# Supplementary material for: Transcriptional Response of Two Brassica napus Cultivars to Short-Term Hypoxia in the Root Zone
Source: Front Plant Sci. 2022 Apr 29;13:897673. doi: 10.3389/fpls.2022.897673 (PMC9100894; doi:10.3389/fpls.2022.897673)
Supplement: Supplementary file 2 [file Data_Sheet_2.xlsx]

## Sheet: Tabelle1
Supporting information
Table S1: RNA sequencing statistics
R = root	S = leaf	K = aerated control	H = hypoxia
Sample	Replicate	No. of reads	No. of reads aligned	% of reads aligned
RAV4h	K1	43992359	33784418	76.7961
RAV4h	K3	40192242	31345135	77.988
RAV4h	K5	50412905	38325430	76.0231
RSZ4h	K1	32961155	24068346	73.0203
RSZ4h	K3	34127518	25013009	73.2928
RSZ4h	K5	44715022	32734834	73.2077
RAV4h	H1	37168710	28783062	77.439
RAV4h	H3	46990718	37018300	78.7779
RAV4h	H4	40851758	31428802	76.9338
RSZ4h	H1	41702657	30556804	73.273
RSZ4h	H3	34478682	25055694	72.6701
RZS4h	H4	36893786	26712900	72.4049
RAV24h	K1	36186672	28087275	77.6177
RAV24h	K3	35381381	27486750	77.687
RAV24h	K5	38514910	29439232	76.4359
RSZ24h	K1	32907604	23779142	72.2603
RSZ24h	K3	39743147	28828849	72.5379
RSZ24h	K5	47066514	33934003	72.098
RAV24h	H1	39695655	30527738	76.9045
RAV24h	H3	29796262	22880655	76.7904
RAV24h	H4	39311539	30753977	78.2314
RSZ24h	H1	30905560	21609929	69.9225
RSZ24h	H3	34682200	24645497	71.0609
RSZ24h	H4	39586148	26838484	67.7977
SAV24h	K1	36898737	29529719	80.0291
SAV24h	K3	51962111	41333017	79.5445
SAV24h	K5	31399817	24945300	79.4441
SZS24h	K1	49788926	36769766	73.8513
SZS24h	K3	32186216	24452001	75.9704
SZS24h	K5	48459487	36586907	75.5
SAV24h	H1	34533071	27515560	79.6789
SAV24h	H3	43413220	34802112	80.1648
SAV24h	H4	45219308	35364701	78.2071
SZS24h	H1	33474630	25242878	75.409
SZS24h	H3	32215368	24233346	75.2229
SZS24h	H4	32077630	24012054	74.8561
