# Supplementary material for: Transcriptional Response of Two Brassica napus Cultivars to Short-Term Hypoxia in the Root Zone
Source: Front Plant Sci. 2022 Apr 29;13:897673. doi: 10.3389/fpls.2022.897673 (PMC9100894; doi:10.3389/fpls.2022.897673)
Supplement: Supplementary file 4 [file Data_Sheet_4.XLSX]

## Sheet: descriptions
Supporting information
Table S3: GO term enrichment analysis of differentially expressed transcripts.
General Abbreviations
	tissue: roots (R) and leaves (L)
	timepoint: 4 h and 24 h
	treatments: aeration (K) and hypoxia (H)
	genotypes: Avatar (AV) and Zhongshuang 9 (ZS)
Sheet GOtotal_up+down_H
	GO analysis of lists of differentially expressed genes (stress response)
	category	GO category: MF, metabolic function; BP, biological process; CC, cellular compartement
	GO ID	GO term number
	GO TERM	GO term description
	totinCat	total number of genes in the expressed Brassica napus transcriptome with this GO term
	FDR	false discovery rate, shows statistics for enrichment of this GO term
	DEinCat	number of differentially expressed genes with this GO term
	groups	differentially expressed in
	1	Avatar R4h up
	2	Avatar R4h down
	3	Avatar R24h up
	4	Avatar R24h down
	5	Avatar L24h up
	6	Avatar L24h down
	7	Zhongshuang R4h up
	8	Zhongshuang R4h down
	9	Zhongshuang R24h up
	10	Zhongshuang R24h down
	11	Zhongshuang L24h up
	12	Zhongshuang L24h down
	13	both R4h up
	14	both R4h down
	15	both R24h up
	16	both R24h down
	17	both L24h up
	18	both L24h down
Sheet -log10_H_up
	-log10 of FDR in the sheet GOtotal_up+down_H for each group (only up)
Sheet -log10_H_down
	-log10 of FDR in the sheet GOtotal_up+down_H for each group (only down)
Sheet GOtotal_genotype_H
	GO analysis of lists of differentially expressed genes (genotype comparison)
	category	GO category: MF, metabolic function; BP, biological process; CC, cellular compartement
	GO ID	GO term number
	GO TERM	GO term description
	totinCat	total number of genes in the expressed Brassica napus transcriptome with this GO term
	FDR	false discovery rate, shows statistics for enrichment of this GO term
	DEinCat	number of differentially expressed genes with this GO term
	groups	differentially expressed in
	1	higher in Avatar H R4h
	2	higher in Zhongshuang H R4h
	3	higher in Avatar H R24h
	4	higher in Zhongshuang H R24h
	5	higher in Avatar H L24h
	6	higher in Zhongshuang H L24h
	7	higher in Avatar K R4h
	8	higher in Zhongshuang K R4h
	9	higher in Avatar K R24h
	10	higher in Zhongshuang K R24h
	11	higher in Avatar K L24h
	12	higher in Zhongshuang K L24h
	13	higher in Avatar H+K R4h
	14	higher in Zhongshuang H+K R4h
	15	higher in Avatar H+K R24h
	16	higher in Zhongshuang H+K R24h
	17	higher in Avatar H+K L24h
	18	higher in Zhongshuang H+K L24h
Sheet -log10_Avatar_higher
	-log10 of FDR in the sheet GOtotal_genotype_H for each group (higher in Avatar)
Sheet -log10_Zhongshuang_higher
	-log10 of FDR in the sheet GOtotal_genotype_H for each group (higher in Zhongshuang)
Sheet GOtotal_GTxTR_H
	GO analysis of lists of differentially expressed genes (genotype x treatment)
	category	GO category: MF, metabolic function; BP, biological process; CC, cellular compartement
	GO ID	GO term number
	GO TERM	GO term description
	totinCat	total number of genes in the expressed Brassica napus transcriptome with this GO term
	FDR	false discovery rate, shows statistics for enrichment of this GO term
	DEinCat	number of differentially expressed genes with this GO term
	groups
	1	sum of 2+3
	2	stronger induced under submergence in Avatar than in Zhongshuang R4h
	3	stronger reduced under submergence in Zhongshuang than in Avatar R4h
	4	sum of 5+6
	5	stronger reduced under submergence in Avatar than in Zhongshuang R4h
	6	stronger induced under submergence in Zhongshuang than in Avatar R4h
	7	sum of 8+9
	8	stronger induced under submergence in Avatar than in Zhongshuang R24h
	9	stronger reduced under submergence in Zhongshuang than in Avatar R24h
	10	sum of 11+12
	11	stronger reduced under submergence in Avatar than in Zhongshuang R24h
	12	stronger induced under submergence in Zhongshuang than in Avatar R24h
	13	sum of 14+15
	14	stronger induced under submergence in Avatar than in Zhongshuang L24h
	15	stronger reduced under submergence in Zhongshuang than in Avatar L24h
	16	sum of 17+18
	17	stronger reduced under submergence in Avatar than in Zhongshuang L24h
	18	stronger induced under submergence in Zhongshuang than in Avatar L24h
Sheet -log10 GTxTR_AV
	-log10 of FDR in the sheet GOtotal_Gtxtreat_H for selected groups (more responsive in Avatar)
Sheet -log10 GTxTR_ZS
	-log10 of FDR in the sheet GOtotal_Gtxtreat_H for selected groups (more responsive in Zhongshuang)

## Sheet: GOtotal_up+down_Hyp
category	GO ID	GO TERM	totinCat	1.FDR_1	1.DEinCat_1	2.FDR_2	2.DEinCat_2	3.FDR_3	3.DEinCat_3	4.FDR_4	4.DEinCat_4	5.FDR_5	5.DEinCat_5	6.FDR_6	6.DEinCat_6	7.FDR_7	7.DEinCat_7	8.FDR_8	8.DEinCat_8	9.FDR_9	9.DEinCat_9	10.FDR_10	10.DEinCat_10	11.FDR_11	11.DEinCat_11	12.FDR_12	12.DEinCat_12	13.FDR_13	13.DEinCat_13	14.FDR_14	14.DEinCat_14	15.FDR_15	15.DEinCat_15	16.FDR_16	16.DEinCat_16	17.FDR_17	17.DEinCat_17	18.FDR_18	18.DEinCat_18
BP	GO:0000002	mitochondrial genome maintenance	5	1	0	1	0	1	0	1	0	1	0	1	0	1	0	1	0	1	0	1	0	1	0	1	0	1	0	1	0	1	0	1	0	1	0	1	0
BP	GO:0000003	reproduction	59	1	0	1	2	1	0	1	0	1	0	1	0	1	0	1	1	1	0	1	1	1	0	1	0	1	0	1	0	1	0	1	0	1	0	1	0
BP	GO:0000012	single strand break repair	4	1	0	0.51809	2	1	0	1	0	1	0	1	0	1	0	0.409995	2	1	0	1	1	1	0	1	0	1	0	0.305813	2	1	0	1	0	1	0	1	0
BP	GO:0000023	maltose metabolic process	432	0.214544	54	1	52	1	10	1	25	1	0	1	0	1	28	1	39	1	9	1	39	1	0	1	2	1	22	1	34	1	4	1	21	1	0	1	0
BP	GO:0000024	maltose biosynthetic process	4	1	1	1	0	1	1	1	1	1	0	1	0	1	1	1	0	1	0	1	0	1	0	1	0	1	1	1	0	1	0	1	0	1	0	1	0
BP	GO:0000025	maltose catabolic process	4	1	0	1	0	1	0	1	0	1	0	1	0	1	0	1	0	1	0	1	1	1	0	1	0	1	0	1	0	1	0	1	0	1	0	1	0
BP	GO:0000028	ribosomal small subunit assembly	16	1	0	1	2	1	0	1	0	1	0	0.0363188	3	1	0	1	2	1	0	1	2	1	0	0.0424097	3	1	0	1	2	1	0	1	0	1	0	0.0669997	2
BP	GO:0000038	very long-chain fatty acid metabolic process	147	1	6	6.06846e-05	43	1	6	0.0973756	19	1	1	1	0	1	5	3.00834e-07	42	1	5	0.343123	20	1	0	1	1	1	5	2.18353e-07	37	1	5	0.275175	13	1	0	1	0
BP	GO:0000041	transition metal ion transport	364	1	24	8.71881e-08	95	1	12	1.44786e-06	57	1	3	1	2	1	24	0.00164552	66	0.249794	28	5.08732e-05	62	1	1	1	0	1	19	0.00598654	53	1	12	0.000187161	39	1	0	1	0
BP	GO:0000045	autophagosome assembly	2	1	0	1	0	1	0	1	0	1	0	1	0	1	0	1	0	1	0	1	0	1	0	1	0	1	0	1	0	1	0	1	0	1	0	1	0
BP	GO:0000060	protein import into nucleus, translocation	17	1	0	1	3	1	0	1	0	1	0	1	0	1	0	1	0	1	0	1	1	1	0	1	1	1	0	1	0	1	0	1	0	1	0	1	0
BP	GO:0000070	mitotic sister chromatid segregation	2	1	0	1	0	1	0	1	0	1	0	1	0	0.898895	1	1	0	1	0	1	0	1	0	1	0	1	0	1	0	1	0	1	0	1	0	1	0
BP	GO:0000076	DNA replication checkpoint	8	1	0	0.51809	3	1	0	1	1	1	0	1	0	1	0	0.356592	3	1	0	0.830673	2	1	0	1	0	1	0	0.235509	3	1	0	1	1	1	0	1	0
BP	GO:0000077	DNA damage checkpoint	8	1	0	1	1	1	0	1	1	1	0	1	0	1	0	1	1	1	0	1	1	1	0	1	0	1	0	1	1	1	0	1	1	1	0	1	0
BP	GO:0000079	regulation of cyclin-dependent protein serine/threonine kinase activity	3	1	0	1	0	1	0	1	0	1	0	1	0	1	0	1	0	1	0	1	0	1	0	1	0	1	0	1	0	1	0	1	0	1	0	1	0
BP	GO:0000082	G1/S transition of mitotic cell cycle	18	1	0	0.982512	4	1	0	1	1	1	0	1	0	1	0	1	3	1	0	1	2	1	0	1	0	1	0	1	3	1	0	1	0	1	0	1	0
BP	GO:0000086	G2/M transition of mitotic cell cycle	7	1	1	1	1	1	0	1	1	1	0	1	0	1	0	0.860715	2	1	0	1	1	1	0	1	0	1	0	1	1	1	0	1	0	1	0	1	0
BP	GO:0000087	mitotic M phase	2	1	0	0.982512	1	1	0	1	0	1	0	1	0	1	0	0.922643	1	1	0	0.0982751	2	1	0	1	0	1	0	0.850511	1	1	0	1	0	1	0	1	0
BP	GO:0000096	sulfur amino acid metabolic process	152	1	15	0.0191525	36	0.99519	10	1	12	1	1	1	0	1	12	0.0133977	31	1	9	0.191767	22	1	0	1	1	1	11	0.032702	25	0.486986	9	1	8	1	0	1	0
BP	GO:0000103	sulfate assimilation	44	0.742772	7	0.0772401	13	1	2	1	3	1	0	1	0	0.0452925	9	0.090681	11	1	1	0.337837	8	1	0	1	0	0.671845	5	0.022728	11	1	1	1	3	1	0	1	0
BP	GO:0000105	histidine biosynthetic process	27	1	0	1	3	1	0	1	2	1	0	1	0	1	0	1	3	1	0	1	4	1	0	1	2	1	0	1	3	1	0	1	2	1	0	1	0
BP	GO:0000154	rRNA modification	5	1	0	1	0	1	0	1	0	1	0	1	1	1	0	1	0	1	0	1	0	1	0	1	0	1	0	1	0	1	0	1	0	1	0	1	0
BP	GO:0000160	phosphorelay signal transduction system	35	0.163263	8	1	1	0.712605	4	0.317034	6	1	2	0.220894	3	0.0398162	8	1	1	0.403238	5	0.00475224	11	0.213881	2	1	1	0.149971	6	1	1	0.311278	4	0.27002	5	1	1	1	1
BP	GO:0000162	tryptophan biosynthetic process	49	1	0	0.0136024	16	1	0	0.460951	7	1	0	1	0	1	0	0.00495753	15	1	0	0.0576188	11	1	0	1	0	1	0	0.0179596	12	1	0	0.126229	7	1	0	1	0
BP	GO:0000165	MAPK cascade	798	1.89143e-08	131	1	60	0.783407	42	1	31	1	5	1	0	5.11878e-13	113	1	51	0.000298673	69	1	44	1	2	1	1	3.7338e-07	82	1	41	0.887662	30	1	21	1	0	1	0
BP	GO:0000169	activation of MAPK activity involved in osmosensory signaling pathway	2	1	0	1	0	1	0	1	0	1	0	1	0	1	0	1	0	1	0	1	0	1	0	1	0	1	0	1	0	1	0	1	0	1	0	1	0
BP	GO:0000184	nuclear-transcribed mRNA catabolic process, nonsense-mediated decay	19	1	0	1	0	1	0	1	0	1	0	1	0	1	0	1	0	1	0	1	0	1	0	1	0	1	0	1	0	1	0	1	0	1	0	1	0
BP	GO:0000209	protein polyubiquitination	8	1	1	1	0	1	0	1	0	1	0	1	0	1	1	1	0	1	1	1	0	1	0	1	0	1	1	1	0	1	0	1	0	1	0	1	0
BP	GO:0000212	meiotic spindle organization	2	0.979073	1	1	0	1	0	1	0	1	0	1	0	1	0	1	0	1	0	1	0	1	0	1	0	1	0	1	0	1	0	1	0	1	0	1	0
BP	GO:0000226	microtubule cytoskeleton organization	468	1	9	1.524e-14	135	1	3	1.07121e-05	65	1	0	1	0	1	4	4.00779e-09	101	1	3	6.84472e-11	93	1	1	1	1	1	3	1.84708e-10	90	1	2	1.73973e-05	50	1	0	1	0
BP	GO:0000237	leptotene	2	1	0	1	0	1	0	1	0	1	0	1	0	1	0	1	0	1	0	1	0	1	0	1	0	1	0	1	0	1	0	1	0	1	0	1	0
BP	GO:0000238	zygotene	2	1	0	1	0	1	0	1	0	1	0	1	0	1	0	1	0	1	0	1	0	1	0	1	0	1	0	1	0	1	0	1	0	1	0	1	0
BP	GO:0000245	spliceosomal complex assembly	8	1	0	1	0	1	0	1	0	1	0	1	0	1	1	1	0	1	0	1	0	1	0	1	0	1	0	1	0	1	0	1	0	1	0	1	0
BP	GO:0000256	allantoin catabolic process	8	1	0	1	2	1	0	1	0	1	0	1	0	1	0	0.356592	3	1	0	1	0	1	0	1	0	1	0	0.830378	2	1	0	1	0	1	0	1	0
BP	GO:0000266	mitochondrial fission	19	1	0	1	0	1	0	1	0	1	0	1	1	1	1	1	0	1	0	1	0	1	0	1	0	1	0	1	0	1	0	1	0	1	0	1	0
BP	GO:0000271	polysaccharide biosynthetic process	343	1	7	6.59617e-22	124	1	3	0.000782149	46	1	1	1	2	1	7	5.69439e-10	83	1	5	0.000121949	58	1	1	1	1	1	5	5.4771e-11	74	1	1	0.00013446	38	1	1	1	0
BP	GO:0000272	polysaccharide catabolic process	97	1	2	0.33767	20	1	0	1	6	1	0	1	0	1	0	1	10	1	1	1	11	1	0	1	0	1	0	1	10	1	0	1	5	1	0	1	0
BP	GO:0000278	mitotic cell cycle	532	1	32	1	73	1	9	1	25	1	0	1	2	1	15	1	55	1	7	1	44	1	0	1	0	1	14	1	50	1	4	1	23	1	0	1	0
BP	GO:0000280	nuclear division	137	1	4	2.12935e-05	42	1	3	1	12	1	1	1	1	1	3	0.000537902	33	1	3	6.87833e-05	31	1	0	1	1	1	1	0.000107874	30	1	3	1	8	1	0	1	0
BP	GO:0000289	nuclear-transcribed mRNA poly(A) tail shortening	10	1	0	1	0	1	0	1	0	1	0	1	0	1	0	1	0	1	0	1	0	1	0	1	0	1	0	1	0	1	0	1	0	1	0	1	0
BP	GO:0000291	nuclear-transcribed mRNA catabolic process, exonucleolytic	3	1	0	1	0	1	0	1	0	1	0	1	0	1	0	1	0	1	0	1	0	1	0	1	0	1	0	1	0	1	0	1	0	1	0	1	0
BP	GO:0000302	response to reactive oxygen species	114	1	9	1	13	1	2	1	10	1	1	0.233482	5	1	7	1	12	1	4	1	10	1	0	1	0	1	5	1	10	1	2	1	7	1	0	1	0
BP	GO:0000303	response to superoxide	113	0.0652841	20	1	10	1	6	1	2	0.601097	4	1	0	0.21642	14	1	9	1	4	1	6	0.167924	3	1	0	0.212717	12	1	7	1	1	1	2	0.00619403	3	1	0
BP	GO:0000304	response to singlet oxygen	15	0.122974	5	1	1	1	1	1	1	1	0	1	0	0.603874	3	1	0	1	1	1	1	1	0	1	1	0.432292	3	1	0	1	1	1	1	1	0	1	0
BP	GO:0000338	protein deneddylation	14	1	0	1	0	1	0	1	0	1	0	1	0	1	0	1	0	1	1	1	0	1	0	1	0	1	0	1	0	1	0	1	0	1	0	1	0
BP	GO:0000354	cis assembly of pre-catalytic spliceosome	2	1	0	1	0	1	0	1	0	1	0	1	0	1	0	1	0	1	0	1	0	1	0	1	0	1	0	1	0	1	0	1	0	1	0	1	0
BP	GO:0000372	Group I intron splicing	2	1	0	1	0	1	0	1	0	1	0	1	0	1	0	1	0	1	0	1	0	1	0	1	0	1	0	1	0	1	0	1	0	1	0	1	0
BP	GO:0000373	Group II intron splicing	26	1	2	1	3	1	0	1	0	1	0	1	1	1	1	1	2	1	1	1	0	1	0	1	0	1	1	1	1	1	0	1	0	1	0	1	0
BP	GO:0000380	alternative mRNA splicing, via spliceosome	13	1	1	1	2	0.295937	3	1	0	1	0	1	0	1	0	0.830856	3	0.358852	3	1	0	1	0	1	0	1	0	1	1	0.137495	3	1	0	1	0	1	0
BP	GO:0000381	regulation of alternative mRNA splicing, via spliceosome	8	0.298573	3	1	0	1	0	1	0	1	0	1	0	0.191058	3	1	0	1	0	1	0	1	0	1	0	1	1	1	0	1	0	1	0	1	0	1	0
BP	GO:0000394	RNA splicing, via endonucleolytic cleavage and ligation	422	1	20	1	42	1	13	1	9	1	1	1	2	1	12	1	23	1	17	1	13	1	0	1	2	1	8	1	21	1	9	1	6	1	0	1	0
BP	GO:0000398	mRNA splicing, via spliceosome	297	1	22	1	7	1	10	1	6	1	1	0.385194	8	1	8	1	4	1	11	1	9	1	0	1	2	1	5	1	1	1	6	1	3	1	0	1	0
BP	GO:0000412	histone peptidyl-prolyl isomerization	7	0.818436	2	1	1	1	0	1	0	1	0	1	0	1	0	1	0	1	0	1	0	1	0	1	0	1	0	1	0	1	0	1	0	1	0	1	0
BP	GO:0000413	protein peptidyl-prolyl isomerization	59	1	4	1	6	1	1	0.795142	7	1	0	1	0	1	3	1	5	1	1	1	7	1	0	1	0	1	2	1	5	1	1	0.960255	5	1	0	1	0
BP	GO:0000447	endonucleolytic cleavage in ITS1 to separate SSU-rRNA from 5.8S rRNA and LSU-rRNA from tricistronic rRNA transcript (SSU-rRNA, 5.8S rRNA, LSU-rRNA)	18	1	0	1	2	1	0	1	0	1	0	0.0449215	3	1	0	1	2	1	0	1	1	1	0	4.10357e-05	5	1	0	1	1	1	0	1	0	1	0	0.0669997	2
BP	GO:0000461	endonucleolytic cleavage to generate mature 3'-end of SSU-rRNA from (SSU-rRNA, 5.8S rRNA, LSU-rRNA)	18	1	0	1	2	1	0	1	0	1	0	0.0449215	3	1	0	1	2	1	0	1	1	1	0	4.10357e-05	5	1	0	1	1	1	0	1	0	1	0	0.0669997	2
BP	GO:0000462	maturation of SSU-rRNA from tricistronic rRNA transcript (SSU-rRNA, 5.8S rRNA, LSU-rRNA)	16	1	0	1	1	1	0	1	0	1	0	0.0363188	3	1	0	1	1	1	0	1	1	1	0	5.263e-11	8	1	0	1	1	1	0	1	0	1	0	0.000662252	3
BP	GO:0000469	cleavage involved in rRNA processing	3	1	0	1	0	1	0	1	0	1	0	1	1	1	0	1	0	1	0	1	0	1	0	1	0	1	0	1	0	1	0	1	0	1	0	1	0
BP	GO:0000478	endonucleolytic cleavage involved in rRNA processing	40	1	1	1	5	1	1	1	1	1	0	0.0045994	5	1	0	1	4	1	0	1	1	1	0	0.434614	3	1	0	1	2	1	0	1	0	1	0	1	0
BP	GO:0000488	maturation of LSU-rRNA from tetracistronic rRNA transcript (SSU-rRNA, LSU-rRNA, 4.5S-rRNA, 5S-rRNA)	2	1	0	1	0	1	0	1	0	1	0	1	0	1	0	1	0	1	0	1	0	1	0	1	0	1	0	1	0	1	0	1	0	1	0	1	0
BP	GO:0000489	maturation of SSU-rRNA from tetracistronic rRNA transcript (SSU-rRNA, LSU-rRNA, 4.5S-rRNA, 5S-rRNA)	2	1	0	1	0	1	0	1	0	1	0	1	0	1	0	1	0	1	0	1	0	1	0	1	0	1	0	1	0	1	0	1	0	1	0	1	0
BP	GO:0000491	small nucleolar ribonucleoprotein complex assembly	3	1	0	1	0	1	1	1	0	1	0	1	0	1	0	1	0	1	0	1	0	1	0	1	0	1	0	1	0	1	0	1	0	1	0	1	0
BP	GO:0000578	embryonic axis specification	7	1	0	1	0	1	1	1	0	1	0	1	0	1	0	1	0	1	0	1	0	1	0	1	0	1	0	1	0	1	0	1	0	1	0	1	0
BP	GO:0000706	meiotic DNA double-strand break processing	3	1	0	1	0	1	0	1	0	1	0	1	0	1	0	1	0	1	0	1	0	1	0	1	0	1	0	1	0	1	0	1	0	1	0	1	0
BP	GO:0000710	meiotic mismatch repair	16	1	0	0.80402	4	1	0	1	0	1	0	1	0	1	0	1	2	1	0	1	1	1	0	1	0	1	0	1	2	1	0	1	0	1	0	1	0
BP	GO:0000712	resolution of meiotic recombination intermediates	11	1	0	0.843331	3	1	0	1	1	1	0	1	0	1	0	0.628737	3	1	0	1	2	1	0	1	0	1	0	1	2	1	0	1	1	1	0	1	0
BP	GO:0000719	photoreactive repair	9	0.377063	3	1	0	1	1	1	0	1	0	1	0	0.240496	3	1	0	1	0	1	0	1	0	1	0	0.156881	3	1	0	1	0	1	0	1	0	1	0
BP	GO:0000723	telomere maintenance	19	1	1	1	2	1	0	1	0	1	0	1	0	1	0	1	0	1	0	1	0	1	0	1	0	1	0	1	0	1	0	1	0	1	0	1	0
BP	GO:0000724	double-strand break repair via homologous recombination	175	1	13	0.00671449	42	1	5	1	8	1	0	1	3	1	7	0.637039	25	1	6	0.501729	22	1	1	1	0	1	6	0.29949	23	1	3	1	7	1	0	1	0
BP	GO:0000731	DNA synthesis involved in DNA repair	4	1	0	0.102204	3	1	0	1	1	1	0	1	0	1	0	0.0652213	3	1	0	0.337837	2	1	0	1	0	1	0	0.0396722	3	1	0	1	1	1	0	1	0
BP	GO:0000738	DNA catabolic process, exonucleolytic	2	1	0	1	0	1	0	1	0	1	0	1	0	1	0	0.922643	1	1	0	1	0	1	0	1	0	1	0	1	0	1	0	1	0	1	0	1	0
BP	GO:0000740	nuclear membrane fusion	4	1	0	1	0	1	0	1	0	1	0	1	0	1	0	1	0	1	0	1	0	1	0	1	0	1	0	1	0	1	0	1	0	1	0	1	0
BP	GO:0000741	karyogamy	123	1	0	1	9	1	1	1	1	1	0	5.19461e-09	14	1	0	1	4	1	2	1	1	1	0	1	1	1	0	1	4	1	0	1	0	1	0	1	0
BP	GO:0000769	syncytium formation by mitosis without cytokinesis	1	0.654476	1	1	0	1	0	1	0	1	0	1	0	1	0	1	0	1	0	1	0	1	0	1	0	1	0	1	0	1	0	1	0	1	0	1	0
BP	GO:0000819	sister chromatid segregation	2	1	0	0.157942	2	1	0	0.802657	1	1	0	1	0	1	0	0.11967	2	1	0	0.0982751	2	1	0	1	0	1	0	0.0902099	2	1	0	0.665369	1	1	0	1	0
BP	GO:0000902	cell morphogenesis	272	1	18	1	23	1	4	1	9	1	0	1	0	1	14	1	13	1	10	1	10	1	0	1	2	1	13	1	11	1	2	1	6	1	0	1	0
BP	GO:0000904	cell morphogenesis involved in differentiation	6	1	0	0.273916	3	1	0	0.00894345	4	1	0	1	1	1	0	0.695989	2	1	0	0.582852	2	1	0	0.135896	2	1	0	0.554927	2	1	0	0.303667	2	1	0	1	1
BP	GO:0000911	cytokinesis by cell plate formation	625	1	9	9.75654e-28	201	1	6	1.33512e-07	87	1	0	1	1	1	4	1.81885e-20	157	1	4	9.63434e-22	141	1	1	1	1	1	4	1.017e-23	143	1	4	4.44844e-08	70	1	0	1	0
BP	GO:0000913	preprophase band assembly	15	1	0	1	0	1	0	1	0	1	0	1	0	1	0	1	1	1	0	1	0	1	0	1	0	1	0	1	0	1	0	1	0	1	0	1	0
BP	GO:0000914	phragmoplast assembly	16	1	1	0.00224363	9	1	0	0.0635722	5	1	0	1	0	1	0	0.0182946	7	1	0	0.0347691	6	1	0	1	0	1	0	0.00585936	7	1	0	0.0995286	4	1	0	1	0
BP	GO:0000919	cell plate assembly	19	1	1	1	0	1	0	1	1	1	0	1	0	1	0	1	2	1	0	1	1	1	0	1	0	1	0	1	0	1	0	1	1	1	0	1	0
BP	GO:0000956	nuclear-transcribed mRNA catabolic process	315	1	31	1	5	1	15	1	4	1	0	1	0	1	17	1	2	1	14	1	2	1	0	1	0	1	12	1	1	1	8	1	1	1	0	1	0
BP	GO:0000957	mitochondrial RNA catabolic process	3	1	0	1	1	1	0	1	0	1	0	1	0	1	0	1	0	1	0	1	0	1	0	1	0	1	0	1	0	1	0	1	0	1	0	1	0
BP	GO:0000963	mitochondrial RNA processing	6	1	0	0.273916	3	1	0	1	0	1	0	1	0	1	0	1	0	1	0	1	0	1	0	1	0	1	0	1	0	1	0	1	0	1	0	1	0
BP	GO:0001510	RNA methylation	696	1	9	1	83	1	7	1	9	1	3	8.49381e-115	123	1	6	1	67	1	6	1	36	1	0	4.67721e-105	108	1	6	1	43	1	3	1	4	1	0	2.33357e-43	37
BP	GO:0001558	regulation of cell growth	14	1	1	1	3	1	0	1	2	1	0	1	0	1	1	1	2	1	0	1	2	1	0	1	0	1	1	1	2	1	0	1	1	1	0	1	0
BP	GO:0001560	regulation of cell growth by extracellular stimulus	6	1	0	0.845832	2	1	0	1	0	1	0	1	0	1	0	0.695989	2	1	0	1	1	1	0	1	0	1	0	0.554927	2	1	0	1	0	1	0	1	0
BP	GO:0001561	fatty acid alpha-oxidation	5	1	0	1	1	1	0	1	0	1	0	0.0576987	2	1	0	0.574338	2	1	0	1	0	1	0	1	0	1	0	1	1	1	0	1	0	1	0	1	0
BP	GO:0001578	microtubule bundle formation	10	1	0	1	0	1	0	1	0	1	0	1	0	1	0	1	0	1	0	1	0	1	0	1	0	1	0	1	0	1	0	1	0	1	0	1	0
BP	GO:0001666	response to hypoxia	216	9.56873e-17	67	1	18	2.14539e-27	58	1	11	1	2	1	1	3.83493e-22	63	1	9	1.49627e-26	61	1	8	1	0	1	0	1.94645e-23	59	1	5	9.84104e-30	52	1	5	1	0	1	0
BP	GO:0001676	long-chain fatty acid metabolic process	78	1	10	1	6	1	6	1	2	1	0	1	0	1	4	1	2	1	5	1	3	1	0	1	0	1	2	1	2	1	4	1	1	1	0	1	0
BP	GO:0001682	tRNA 5'-leader removal	4	1	0	1	0	1	0	1	0	1	0	1	0	1	0	1	0	1	0	1	0	1	0	1	0	1	0	1	0	1	0	1	0	1	0	1	0
BP	GO:0001708	cell fate specification	85	1	6	0.206811	19	1	1	0.826941	9	1	0	1	1	1	3	0.0684147	18	1	2	0.0277639	17	1	0	1	0	1	2	0.0449854	16	1	1	0.457844	8	1	0	1	0
BP	GO:0001709	cell fate determination	14	1	1	1	0	1	0	1	0	1	1	1	0	1	0	1	0	1	0	1	0	1	0	1	0	1	0	1	0	1	0	1	0	1	0	1	0
BP	GO:0001736	establishment of planar polarity	13	1	0	0.0139153	7	1	0	1	2	1	0	1	0	1	0	0.113395	5	1	0	1	2	1	0	1	0	1	0	0.0535778	5	1	0	1	1	1	0	1	0
BP	GO:0001778	plasma membrane repair	2	1	0	1	0	1	0	1	0	1	0	1	0	1	0	1	0	1	0	1	0	1	0	1	0	1	0	1	0	1	0	1	0	1	0	1	0
BP	GO:0001881	receptor recycling	4	1	0	1	0	1	0	1	0	1	0	1	0	1	0	1	0	1	0	1	0	1	0	1	0	1	0	1	0	1	0	1	0	1	0	1	0
BP	GO:0001887	selenium compound metabolic process	10	1	0	0.0154479	6	1	0	0.00894345	5	1	0	1	0	1	0	0.164989	4	1	0	0.395392	3	1	0	1	0	1	0	0.0936553	4	1	0	0.633393	2	1	0	1	0
BP	GO:0001932	regulation of protein phosphorylation	5	1	0	1	0	1	0	1	1	1	0	1	0	1	0	1	0	1	0	0.00744966	4	1	0	1	0	1	0	1	0	1	0	1	1	1	0	1	0
BP	GO:0001944	vasculature development	15	1	0	1	2	1	0	0.204868	4	1	0	1	1	1	0	1	1	1	0	0.337837	4	1	0	1	0	1	0	1	1	1	0	0.321742	3	1	0	1	0
BP	GO:0002098	tRNA wobble uridine modification	8	1	0	1	0	1	0	1	0	1	0	1	0	1	0	1	0	1	0	1	0	1	0	1	0	1	0	1	0	1	0	1	0	1	0	1	0
BP	GO:0002100	tRNA wobble adenosine to inosine editing	3	1	0	1	0	1	0	1	0	1	0	1	0	1	0	1	0	1	0	1	0	1	0	1	0	1	0	1	0	1	0	1	0	1	0	1	0
BP	GO:0002213	defense response to insect	116	0.809835	15	1	15	0.108086	12	0.769438	12	1	2	1	0	0.380712	13	1	10	0.112482	13	1	12	1	0	1	0	0.677014	10	1	7	0.0223731	11	1	8	1	0	1	0
BP	GO:0002215	defense response to nematode	4	0.377063	2	1	1	0.209999	2	1	1	1	0	1	0	1	1	1	1	0.249794	2	1	0	1	0	1	0	1	1	1	1	0.12629	2	1	0	1	0	1	0
BP	GO:0002229	defense response to oomycetes	41	1	3	0.611998	9	1	0	1	4	1	0	1	0	1	2	0.820502	7	1	1	0.26359	8	1	0	1	0	1	1	0.438873	7	1	0	0.876862	4	1	0	1	0
BP	GO:0002237	response to molecule of bacterial origin	272	0.911668	31	1	40	0.00486385	26	1	8	1	1	1	1	0.864849	23	1	32	0.00365185	29	1	15	1	2	1	0	0.863302	19	1	28	0.0347391	18	1	6	1	0	1	0
BP	GO:0002238	response to molecule of fungal origin	95	0.298573	15	1	13	0.326819	9	1	8	1	2	1	0	0.142858	13	1	7	0.0674776	12	1	8	1	0	1	0	0.320415	10	1	7	0.142765	8	1	4	1	0	1	0
BP	GO:0002240	response to molecule of oomycetes origin	8	0.298573	3	1	1	1	1	1	0	1	0	1	0	0.0280948	4	1	0	1	1	1	0	1	0	1	0	0.125155	3	1	0	1	0	1	0	1	0	1	0
BP	GO:0002540	leukotriene production involved in inflammatory response	4	1	0	1	1	1	0	1	1	1	0	1	0	1	0	1	1	1	0	1	1	1	0	1	0	1	0	1	1	1	0	1	1	1	0	1	0
BP	GO:0002679	respiratory burst involved in defense response	448	6.40247e-21	115	1	15	3.5585e-06	46	1	11	1	1	1	0	1.31061e-27	104	1	8	6.95971e-23	83	1	10	1	1	1	0	1.04927e-18	79	1	5	1.21965e-09	43	1	9	1	0	1	0
BP	GO:0002752	cell surface pattern recognition receptor signaling pathway	2	1	0	1	0	1	0	1	0	1	0	1	0	1	0	1	0	1	0	1	0	1	0	1	0	1	0	1	0	1	0	1	0	1	0	1	0
BP	GO:0002764	immune response-regulating signaling pathway	2	0.11299	2	1	0	1	0	1	0	1	0	1	0	0.898895	1	1	0	1	0	1	0	1	0	1	0	0.772216	1	1	0	1	0	1	0	1	0	1	0
BP	GO:0003002	regionalization	64	1	2	1	3	1	0	1	1	1	0	1	0	1	2	1	4	1	1	1	3	1	0	1	0	1	2	1	3	1	0	1	1	1	0	1	0
BP	GO:0003006	developmental process involved in reproduction	19	1	3	1	1	1	2	1	0	1	1	1	1	1	0	0.765649	4	1	2	1	0	1	0	1	0	1	0	1	1	1	2	1	0	1	0	1	0
BP	GO:0003156	regulation of animal organ formation	2	0.979073	1	1	0	1	0	1	0	1	0	1	0	1	0	1	0	1	0	1	0	1	0	1	0	1	0	1	0	1	0	1	0	1	0	1	0
BP	GO:0005513	detection of calcium ion	22	1	0	0.843331	5	1	0	1	2	1	0	1	0	1	0	0.241064	6	1	0	1	3	1	0	1	0	1	0	0.305813	5	1	0	1	2	1	0	1	0
BP	GO:0005975	carbohydrate metabolic process	248	1	11	0.0136024	54	1	5	1	16	1	0	1	0	1	10	0.0351938	43	1	8	1	24	1	0	1	0	1	8	0.128504	33	1	4	1	11	1	0	1	0
BP	GO:0005976	polysaccharide metabolic process	5	1	0	0.170437	3	1	0	0.0524224	3	1	0	1	0	1	0	0.11967	3	1	0	0.00744966	4	1	0	1	0	1	0	0.0769388	3	1	0	0.0241333	3	1	0	1	0
BP	GO:0005982	starch metabolic process	153	1	7	0.982512	25	1	3	1	14	1	0	1	0	1	7	1	13	1	9	0.830673	18	1	0	1	0	1	4	1	13	1	2	1	10	1	0	1	0
BP	GO:0005983	starch catabolic process	58	1	5	1	5	1	2	1	6	1	0	1	0	1	3	1	2	1	2	1	7	1	0	1	0	1	2	1	2	1	0	1	4	1	0	1	0
BP	GO:0005985	sucrose metabolic process	24	1	2	0.982512	5	1	0	0.628615	4	1	1	1	0	1	1	1	4	1	1	0.180052	6	1	0	1	0	1	1	1	3	1	0	0.279329	4	1	0	1	0
BP	GO:0005986	sucrose biosynthetic process	44	0.21332	9	1	3	0.209999	6	0.637577	6	1	0	1	0	0.268236	7	1	1	0.329639	6	0.337837	8	1	0	1	0	0.136396	7	1	0	0.186315	5	0.984561	4	1	0	1	0
BP	GO:0005987	sucrose catabolic process	12	1	0	1	2	1	0	1	2	1	0	1	0	1	0	1	2	1	0	1	2	1	0	1	0	1	0	1	2	1	0	0.758778	2	1	0	1	0
BP	GO:0005991	trehalose metabolic process	5	1	0	1	0	1	0	1	0	1	0	1	0	1	0	1	0	1	0	1	0	1	0	1	0	1	0	1	0	1	0	1	0	1	0	1	0
BP	GO:0005992	trehalose biosynthetic process	53	0.0534547	12	0.137957	14	0.796709	5	0.0566111	10	1	1	1	1	0.119695	9	0.11967	12	0.260422	7	0.0408783	12	1	0	1	0	0.043797	9	0.0769744	11	0.311333	5	0.0216329	9	1	0	1	0
BP	GO:0005993	trehalose catabolic process	4	0.377063	2	1	0	1	1	1	0	1	0	1	0	0.268236	2	1	0	1	0	1	0	1	0	1	0	0.212717	2	1	0	1	0	1	0	1	0	1	0
BP	GO:0005996	monosaccharide metabolic process	4	1	0	1	0	1	0	1	0	1	0	1	0	1	0	1	0	1	0	1	0	1	0	1	0	1	0	1	0	1	0	1	0	1	0	1	0
BP	GO:0005997	xylulose metabolic process	2	1	0	1	0	1	0	1	0	1	0	1	0	1	0	1	0	1	0	1	0	1	0	1	0	1	0	1	0	1	0	1	0	1	0	1	0
BP	GO:0006000	fructose metabolic process	17	1	3	1	0	1	0	1	0	1	0	1	0	1	1	1	1	1	0	1	2	1	0	1	0	1	1	1	0	1	0	1	0	1	0	1	0
BP	GO:0006002	fructose 6-phosphate metabolic process	6	1	1	1	0	1	0	1	0	1	0	1	0	1	0	1	1	1	0	1	0	1	0	1	0	1	0	1	0	1	0	1	0	1	0	1	0
BP	GO:0006003	fructose 2,6-bisphosphate metabolic process	6	1	1	1	0	1	0	1	0	1	0	1	0	1	0	1	1	1	0	1	0	1	0	1	0	1	0	1	0	1	0	1	0	1	0	1	0
BP	GO:0006005	L-fucose biosynthetic process	2	1	0	1	0	1	0	1	0	1	0	1	0	1	0	1	0	1	0	1	0	1	0	1	0	1	0	1	0	1	0	1	0	1	0	1	0
BP	GO:0006006	glucose metabolic process	21	1	0	0.747737	5	1	0	0.0458408	6	1	0	1	0	1	1	1	1	1	0	0.105999	6	1	0	1	0	1	0	1	1	1	0	0.0109796	6	1	0	1	0
BP	GO:0006007	glucose catabolic process	449	1	26	1	52	1	18	1	16	1	1	1	1	1	18	1	35	1	20	1	20	1	0	1	2	1	14	1	28	1	12	1	11	1	0	1	0
BP	GO:0006011	UDP-glucose metabolic process	4	1	0	1	0	1	0	1	0	1	0	1	0	1	0	1	0	1	0	1	0	1	0	1	0	1	0	1	0	1	0	1	0	1	0	1	0
BP	GO:0006012	galactose metabolic process	43	1	2	0.982512	8	1	2	1	3	1	0	1	0	1	3	1	3	1	2	1	5	1	0	1	0	1	1	1	3	1	2	1	2	1	0	1	0
BP	GO:0006020	inositol metabolic process	8	1	0	1	1	1	0	1	1	1	1	1	0	1	0	0.949169	2	1	0	0.26359	3	1	0	1	0	1	0	1	1	1	0	1	1	1	0	1	0
BP	GO:0006021	inositol biosynthetic process	12	1	0	1	1	1	0	0.0203793	5	1	0	1	0	1	0	1	0	1	0	0.00744966	6	1	0	1	0	1	0	1	0	1	0	0.0404298	4	1	0	1	0
BP	GO:0006032	chitin catabolic process	6	0.679037	2	1	1	0.403881	2	1	0	1	0	1	0	1	1	1	1	0.0648875	3	0.582852	2	1	0	1	0	1	1	1	1	0.239498	2	1	0	1	0	1	0
BP	GO:0006042	glucosamine biosynthetic process	4	1	1	0.51809	2	1	1	1	0	1	0	1	0	1	1	0.409995	2	1	1	1	0	1	0	1	0	1	1	0.305813	2	1	1	1	0	1	0	1	0
BP	GO:0006044	N-acetylglucosamine metabolic process	4	1	0	1	1	1	0	1	0	1	0	1	0	1	0	1	1	1	0	1	1	1	0	1	0	1	0	1	1	1	0	1	0	1	0	1	0
BP	GO:0006047	UDP-N-acetylglucosamine metabolic process	6	1	0	0.0580789	4	1	0	1	1	1	0	1	0	1	0	1	1	1	0	1	1	1	0	1	0	1	0	1	1	1	0	1	1	1	0	1	0
BP	GO:0006048	UDP-N-acetylglucosamine biosynthetic process	11	1	1	1	0	1	1	1	0	1	0	1	0	1	1	1	0	1	1	1	0	1	0	1	0	1	1	1	0	1	1	1	0	1	0	1	0
BP	GO:0006065	UDP-glucuronate biosynthetic process	11	1	1	0.843331	3	1	0	1	1	1	0	1	0	1	1	1	2	1	0	1	2	1	0	1	0	1	1	1	2	1	0	1	1	1	0	1	0
BP	GO:0006066	alcohol metabolic process	4	1	0	1	1	1	0	1	0	1	0	1	0	1	0	1	1	1	0	1	0	1	0	1	0	1	0	1	1	1	0	1	0	1	0	1	0
BP	GO:0006071	glycerol metabolic process	46	1	4	0.182164	12	1	1	1	3	1	0	1	0	1	2	1	5	1	2	0.690878	7	1	0	1	0	1	2	1	5	1	1	1	3	1	0	1	0
BP	GO:0006072	glycerol-3-phosphate metabolic process	11	1	1	1	1	1	0	1	1	1	0	1	0	1	1	1	0	1	0	1	1	1	0	1	0	1	1	1	0	1	0	1	0	1	0	1	0
BP	GO:0006075	(1->3)-beta-D-glucan biosynthetic process	37	1	2	1	2	1	2	1	0	1	1	1	0	1	2	1	1	1	2	1	0	1	0	1	0	1	0	1	1	1	1	1	0	1	0	1	0
BP	GO:0006083	acetate metabolic process	5	1	0	1	0	1	0	1	0	1	0	1	0	1	0	1	0	1	0	1	0	1	0	1	0	1	0	1	0	1	0	1	0	1	0	1	0
BP	GO:0006084	acetyl-CoA metabolic process	277	1	6	2.30522e-20	105	1	3	1.4126e-09	54	1	1	1	0	1	6	5.40568e-17	86	1	5	9.67813e-11	65	1	1	1	3	1	5	2.42516e-18	78	1	3	4.32708e-08	42	1	0	1	0
BP	GO:0006085	acetyl-CoA biosynthetic process	33	1	4	1	5	0.637463	4	0.608572	5	1	1	1	1	0.246988	6	0.768183	6	0.120474	6	1	4	1	0	1	1	0.7427	4	1	4	0.266617	4	1	3	1	0	1	0
BP	GO:0006086	acetyl-CoA biosynthetic process from pyruvate	7	1	0	1	1	1	0	0.622377	2	1	0	1	0	1	0	1	0	1	0	1	0	1	0	1	1	1	0	1	0	1	0	1	0	1	0	1	0
BP	GO:0006091	generation of precursor metabolites and energy	131	1	1	1	2	1	0	1	0	1	0	1	0	1	4	1	0	1	0	1	0	1	0	1	0	1	1	1	0	1	0	1	0	1	0	1	0
BP	GO:0006094	gluconeogenesis	706	1	51	1	94	0.19674	43	1	39	1	0	1	5	1	49	1	63	0.0674776	52	1	42	1	0	1	10	1	41	1	57	0.0435939	35	1	20	1	0	1	2
BP	GO:0006096	glycolytic process	882	1	64	1	127	0.3069	50	1	58	1	3	1	10	1	56	1	84	0.112482	61	1	66	1	0	1	12	1	45	1	74	0.24276	37	1	35	1	0	1	3
BP	GO:0006097	glyoxylate cycle	2	1	0	1	0	1	0	1	0	1	0	1	0	1	0	1	0	1	0	1	0	1	0	1	0	1	0	1	0	1	0	1	0	1	0	1	0
BP	GO:0006098	pentose-phosphate shunt	608	0.00111287	88	1	41	1	25	1	17	1	2	1	3	0.370511	51	1	32	1	26	1	24	1	0	1	1	0.236831	44	1	22	1	15	1	8	1	0	1	0
BP	GO:0006099	tricarboxylic acid cycle	51	1	1	0.00290926	18	1	0	0.0458408	10	1	0	1	0	1	1	0.370009	10	1	0	0.33185	9	1	0	1	0	1	0	0.131441	10	1	0	0.147886	7	1	0	1	0
BP	GO:0006101	citrate metabolic process	9	1	0	1	2	1	0	0.802657	2	1	0	1	0	1	0	1	2	1	0	1	0	1	0	1	0	1	0	0.904099	2	1	0	1	0	1	0	1	0
BP	GO:0006102	isocitrate metabolic process	31	1	0	1	4	1	0	1	2	1	0	1	0	1	0	1	2	1	1	1	0	1	0	1	0	1	0	1	2	1	0	1	0	1	0	1	0
BP	GO:0006104	succinyl-CoA metabolic process	2	1	0	1	0	0.871675	1	1	0	1	0	1	0	1	0	1	0	0.926819	1	1	0	1	0	1	0	1	0	1	0	0.766787	1	1	0	1	0	1	0
BP	GO:0006105	succinate metabolic process	6	1	0	1	1	1	0	1	1	1	1	1	0	1	0	0.695989	2	1	0	0.129114	3	1	0	1	0	1	0	1	1	1	0	1	1	1	0	1	0
BP	GO:0006108	malate metabolic process	15	1	2	1	2	0.403171	3	1	1	1	0	1	0	1	2	1	1	1	2	1	1	1	0	1	0	1	2	1	1	0.848344	2	1	1	1	0	1	0
BP	GO:0006109	regulation of carbohydrate metabolic process	19	0.659473	4	1	0	1	0	1	0	1	0	1	0	1	0	1	0	1	1	1	1	1	0	1	0	1	0	1	0	1	0	1	0	1	0	1	0
BP	GO:0006110	regulation of glycolytic process	4	1	0	1	0	1	0	1	0	1	0	1	0	1	0	1	0	1	0	1	1	1	0	1	0	1	0	1	0	1	0	1	0	1	0	1	0
BP	GO:0006120	mitochondrial electron transport, NADH to ubiquinone	28	1	1	1	0	1	1	1	0	1	0	1	0	1	0	1	0	1	1	1	0	1	0	1	0	1	0	1	0	1	1	1	0	1	0	1	0
BP	GO:0006121	mitochondrial electron transport, succinate to ubiquinone	19	1	0	1	1	1	0	0.84207	3	1	0	1	0	1	0	1	1	1	0	1	2	1	0	1	0	1	0	1	1	1	0	1	1	1	0	1	0
BP	GO:0006122	mitochondrial electron transport, ubiquinol to cytochrome c	20	1	0	1	0	1	0	1	0	1	0	1	0	1	0	1	0	1	0	1	0	1	0	1	0	1	0	1	0	1	0	1	0	1	0	1	0
BP	GO:0006127	glycerophosphate shuttle	4	1	0	1	1	1	0	1	1	1	0	1	0	1	0	1	1	1	0	0.337837	2	1	0	1	0	1	0	1	1	1	0	1	1	1	0	1	0
BP	GO:0006139	nucleobase-containing compound metabolic process	11	1	0	1	2	1	0	1	1	1	0	1	0	1	0	1	1	1	0	1	2	1	0	1	0	1	0	1	1	1	0	1	0	1	0	1	0
BP	GO:0006144	purine nucleobase metabolic process	2	0.11299	2	1	0	0.0674364	2	1	0	1	0	1	0	0.088348	2	1	0	0.0674776	2	1	0	1	0	1	0	0.0630082	2	1	0	0.0347391	2	1	0	1	0	1	0
BP	GO:0006145	purine nucleobase catabolic process	16	1	1	1	2	1	1	1	0	1	0	1	0	1	1	0.566827	4	1	1	1	0	1	0	1	0	1	1	1	2	1	1	1	0	1	0	1	0
BP	GO:0006148	inosine catabolic process	7	1	1	1	0	1	1	1	0	1	0	1	0	1	0	1	0	1	1	1	1	1	0	1	0	1	0	1	0	1	0	1	0	1	0	1	0
BP	GO:0006152	purine nucleoside catabolic process	6	1	0	0.0580789	4	1	0	0.082393	3	1	0	1	0	1	0	0.0305975	4	1	0	0.0179159	4	1	0	1	0	1	0	0.0153314	4	1	0	0.0404298	3	1	0	1	0
BP	GO:0006154	adenosine catabolic process	4	1	1	1	0	1	1	1	0	1	0	1	0	1	0	1	0	1	1	1	0	1	0	1	0	1	0	1	0	1	0	1	0	1	0	1	0
BP	GO:0006164	purine nucleotide biosynthetic process	118	1	2	1	14	1	2	1	2	1	0	4.46834e-14	18	1	0	1	5	1	0	1	1	1	0	8.97173e-06	10	1	0	1	5	1	0	1	1	1	0	0.000514495	5
BP	GO:0006166	purine ribonucleoside salvage	2	1	0	1	0	1	0	1	0	1	0	1	0	1	0	1	0	1	0	1	0	1	0	1	0	1	0	1	0	1	0	1	0	1	0	1	0
BP	GO:0006167	AMP biosynthetic process	6	1	0	1	1	1	0	1	0	1	0	1	0	1	0	1	0	1	0	1	0	1	0	1	1	1	0	1	0	1	0	1	0	1	0	1	0
BP	GO:0006168	adenine salvage	13	0.742772	3	0.200385	5	0.295937	3	1	1	1	0	1	1	1	1	1	2	0.358852	3	0.626039	3	1	0	1	0	1	1	1	2	0.137495	3	1	1	1	0	1	0
BP	GO:0006169	adenosine salvage	9	1	0	0.617837	3	1	0	1	0	1	0	1	0	1	0	1	2	1	0	0.912388	2	1	0	1	0	1	0	0.904099	2	1	0	1	0	1	0	1	0
BP	GO:0006176	dATP biosynthetic process from ADP	3	1	0	1	0	1	0	1	0	1	0	1	0	1	1	1	0	1	0	1	0	1	0	1	0	1	0	1	0	1	0	1	0	1	0	1	0
BP	GO:0006177	GMP biosynthetic process	4	0.377063	2	1	0	0.209999	2	1	0	1	0	1	1	0.268236	2	1	0	0.249794	2	1	0	1	0	1	0	0.212717	2	1	0	0.12629	2	1	0	1	0	1	0
BP	GO:0006178	guanine salvage	2	1	0	1	0	1	0	1	0	1	0	1	0	1	0	1	0	1	0	1	0	1	0	1	0	1	0	1	0	1	0	1	0	1	0	1	0
BP	GO:0006182	cGMP biosynthetic process	3	1	0	1	0	1	0	1	0	1	0	1	0	1	0	1	0	1	0	1	1	1	0	1	0	1	0	1	0	1	0	1	0	1	0	1	0
BP	GO:0006189	'de novo' IMP biosynthetic process	4	1	0	1	0	1	0	1	0	1	0	1	0	1	0	1	0	1	0	1	0	1	0	1	0	1	0	1	0	1	0	1	0	1	0	1	0
BP	GO:0006207	'de novo' pyrimidine nucleobase biosynthetic process	14	1	0	1	0	1	0	1	0	1	0	1	0	1	0	1	0	1	0	1	0	1	0	1	0	1	0	1	0	1	0	1	0	1	0	1	0
BP	GO:0006212	uracil catabolic process	11	1	1	1	0	1	0	1	1	1	0	1	0	1	0	1	0	1	0	1	0	1	0	1	0	1	0	1	0	1	0	1	0	1	0	1	0
BP	GO:0006218	uridine catabolic process	5	1	0	0.0258321	4	1	0	0.381142	2	1	0	1	0	1	0	0.01388	4	1	0	0.0868169	3	1	0	1	0	1	0	0.00656886	4	1	0	0.230446	2	1	0	1	0
BP	GO:0006221	pyrimidine nucleotide biosynthetic process	5	1	0	1	0	1	0	1	0	1	0	1	0	1	0	1	0	1	0	1	0	1	0	1	0	1	0	1	0	1	0	1	0	1	0	1	0
BP	GO:0006259	DNA metabolic process	93	1	4	1	10	1	0	1	1	1	0	1	2	1	2	1	3	1	1	1	2	1	0	1	0	1	2	1	3	1	0	1	1	1	0	1	0
BP	GO:0006260	DNA replication	284	1	4	6.84379e-28	120	1	1	0.00335424	38	1	0	1	2	1	2	2.02402e-25	102	1	0	7.52664e-29	97	1	0	1	0	1	2	6.52939e-25	90	1	0	0.000187161	33	1	0	1	0
BP	GO:0006261	DNA-dependent DNA replication	258	1	4	5.91971e-18	96	1	1	1	18	1	0	1	0	1	2	1.29154e-12	74	1	3	1.0722e-12	66	1	0	1	0	1	2	2.12074e-14	68	1	1	1	16	1	0	1	0
BP	GO:0006264	mitochondrial DNA replication	6	1	0	1	1	1	0	1	1	1	0	1	0	1	0	1	1	1	0	1	0	1	0	1	0	1	0	1	0	1	0	1	0	1	0	1	0
BP	GO:0006265	DNA topological change	34	1	0	1	4	1	0	1	1	1	0	1	0	1	0	1	3	1	0	1	2	1	0	1	0	1	0	1	2	1	0	1	1	1	0	1	0
BP	GO:0006266	DNA ligation	10	1	0	1	2	1	0	1	0	1	0	1	0	1	0	1	2	1	0	1	1	1	0	1	0	1	0	1	2	1	0	1	0	1	0	1	0
BP	GO:0006268	DNA unwinding involved in DNA replication	33	1	0	1.53362e-05	17	1	0	0.0962912	7	1	0	1	0	1	0	7.50288e-08	18	1	0	4.21716e-07	16	1	0	1	0	1	0	1.35365e-05	14	1	0	0.0208414	7	1	0	1	0
BP	GO:0006269	DNA replication, synthesis of RNA primer	4	1	0	0.102204	3	1	0	1	1	1	0	1	0	1	0	0.0652213	3	1	0	0.337837	2	1	0	1	0	1	0	0.0396722	3	1	0	1	1	1	0	1	0
BP	GO:0006270	DNA replication initiation	174	1	3	2.90859e-30	92	1	2	0.000506391	29	1	0	1	1	1	3	1.10812e-28	81	1	0	2.08573e-30	76	1	0	1	0	1	3	1.51496e-27	72	1	0	1.02983e-05	27	1	0	1	0
BP	GO:0006271	DNA strand elongation involved in DNA replication	5	1	0	0.0258321	4	1	0	0.381142	2	1	0	1	0	1	0	0.01388	4	1	0	0.0868169	3	1	0	1	0	1	0	0.00656886	4	1	0	0.230446	2	1	0	1	0
BP	GO:0006275	regulation of DNA replication	315	1	6	4.27667e-32	135	1	2	0.000462658	44	1	0	1	1	1	4	3.195e-30	117	1	1	2.50079e-28	102	1	0	1	0	1	4	5.36473e-30	104	1	0	0.000123899	36	1	0	1	0
BP	GO:0006278	RNA-dependent DNA biosynthetic process	1	1	0	1	0	1	0	1	0	1	0	1	0	1	0	1	0	1	0	1	0	1	0	1	0	1	0	1	0	1	0	1	0	1	0	1	0
BP	GO:0006279	premeiotic DNA replication	3	1	0	0.33767	2	1	0	1	1	1	0	1	0	1	0	0.264978	2	1	0	1	1	1	0	1	0	1	0	0.202751	2	1	0	0.887595	1	1	0	1	0
BP	GO:0006281	DNA repair	296	1	21	1	37	1	5	1	8	1	2	1	2	1	16	1	29	1	11	1	25	1	2	1	2	1	11	1	26	1	4	1	8	1	0	1	0
BP	GO:0006282	regulation of DNA repair	6	1	0	1	1	1	0	1	0	1	0	1	0	1	0	1	1	1	0	1	0	1	0	1	1	1	0	1	1	1	0	1	0	1	0	1	0
BP	GO:0006284	base-excision repair	28	1	1	1	4	1	0	1	1	1	0	1	0	1	0	1	3	1	0	1	3	1	0	1	0	1	0	1	3	1	0	1	1	1	0	1	0
BP	GO:0006287	base-excision repair, gap-filling	2	1	0	0.982512	1	1	0	1	0	1	0	1	0	1	0	1	0	1	0	1	0	1	0	1	0	1	0	1	0	1	0	1	0	1	0	1	0
BP	GO:0006289	nucleotide-excision repair	17	1	0	1	0	1	0	1	1	1	0	1	0	1	0	1	1	1	0	1	1	1	0	1	0	1	0	1	0	1	0	1	1	1	0	1	0
BP	GO:0006290	pyrimidine dimer repair	7	1	1	0.384016	3	1	0	1	0	1	0	1	0	1	1	1	1	1	0	1	0	1	0	1	0	1	1	1	1	1	0	1	0	1	0	1	0
BP	GO:0006294	nucleotide-excision repair, preincision complex assembly	2	1	0	1	0	1	0	1	0	1	0	1	0	1	0	1	0	1	0	1	0	1	0	1	0	1	0	1	0	1	0	1	0	1	0	1	0
BP	GO:0006296	nucleotide-excision repair, DNA incision, 5'-to lesion	2	1	0	1	0	1	0	1	0	1	0	1	0	1	0	1	0	1	0	1	0	1	0	1	0	1	0	1	0	1	0	1	0	1	0	1	0
BP	GO:0006297	nucleotide-excision repair, DNA gap filling	2	1	0	0.982512	1	1	0	1	0	1	0	1	0	1	0	1	0	1	0	1	0	1	0	1	0	1	0	1	0	1	0	1	0	1	0	1	0
BP	GO:0006298	mismatch repair	34	1	0	1	5	1	0	1	3	1	0	1	0	1	0	1	3	1	0	1	3	1	0	1	0	1	0	1	2	1	0	1	2	1	0	1	0
BP	GO:0006301	postreplication repair	112	1	7	1	7	1	6	1	3	1	0	1	0	1	3	1	2	1	5	1	5	1	0	1	0	1	2	1	1	1	2	1	2	1	0	1	0
BP	GO:0006302	double-strand break repair	107	1	1	1	14	1	1	1	4	1	0	1	0	1	0	1	7	1	2	1	4	0.0213822	4	1	1	1	0	1	5	1	0	1	2	1	0	1	0
BP	GO:0006303	double-strand break repair via nonhomologous end joining	5	1	0	1	0	1	0	1	0	1	0	1	0	1	0	1	1	1	0	1	0	1	0	1	0	1	0	1	0	1	0	1	0	1	0	1	0
BP	GO:0006306	DNA methylation	466	1	8	8.24256e-18	143	1	1	0.213531	45	1	1	1	2	1	7	7.71392e-15	116	1	2	6.48041e-18	109	1	1	1	1	1	6	4.64477e-15	101	1	0	0.0433033	37	1	0	1	0
BP	GO:0006308	DNA catabolic process	14	1	0	1	2	1	0	1	2	1	0	1	1	1	0	1	0	1	0	0.716567	3	1	0	1	0	1	0	1	0	1	0	1	1	1	0	1	0
BP	GO:0006310	DNA recombination	128	1	5	1	19	1	2	1	4	1	0	1	0	1	4	1	10	1	4	1	9	1	2	1	0	1	3	1	9	1	1	1	4	1	0	1	0
BP	GO:0006311	meiotic gene conversion	4	1	0	1	1	1	0	1	0	1	0	1	0	1	0	1	0	1	0	1	0	1	0	1	0	1	0	1	0	1	0	1	0	1	0	1	0
BP	GO:0006312	mitotic recombination	143	1	6	1	15	1	2	1	1	1	0	1	1	1	4	1	7	1	5	1	5	1	0	1	2	1	4	1	6	1	2	1	1	1	0	1	0
BP	GO:0006325	chromatin organization	74	1	3	1	7	1	2	1	1	1	0	1	0	1	1	1	3	1	0	1	3	1	0	1	0	1	1	1	2	1	0	1	1	1	0	1	0
BP	GO:0006333	chromatin assembly or disassembly	132	1	3	1	13	1	3	1	5	1	2	0.40516	5	1	3	1	9	1	3	1	9	1	1	1	1	1	0	1	7	1	2	1	4	1	0	1	0
BP	GO:0006334	nucleosome assembly	55	1	1	1	8	1	1	1	3	1	0	1	1	1	0	1	3	1	0	1	5	1	0	1	1	1	0	1	3	1	0	1	3	1	0	1	0
BP	GO:0006338	chromatin remodeling	42	1	1	1	4	1	1	1	1	1	0	1	0	1	0	1	4	1	0	1	5	1	0	1	0	1	0	1	3	1	0	1	1	1	0	1	0
BP	GO:0006342	chromatin silencing	375	1	7	2.08219e-09	102	1	2	0.172934	38	1	0	1	6	1	8	9.69605e-08	82	1	3	2.152e-06	68	1	2	1	4	1	5	4.72294e-08	71	1	2	0.0489948	31	1	0	1	3
BP	GO:0006344	maintenance of chromatin silencing	11	1	0	0.843331	3	1	0	0.99031	2	1	0	1	0	1	0	0.628737	3	1	0	0.481418	3	1	0	1	0	1	0	0.438873	3	1	0	0.665369	2	1	0	1	0
BP	GO:0006346	methylation-dependent chromatin silencing	366	1	12	1.93743e-06	91	1	7	0.901681	31	1	0	1	1	1	6	0.00313376	65	1	2	0.000115446	61	1	0	1	2	1	5	0.000103913	60	1	2	0.221967	27	1	0	1	0
BP	GO:0006349	regulation of gene expression by genetic imprinting	36	1	0	1	6	1	0	1	2	1	0	1	0	1	0	1	5	1	1	1	5	1	0	1	0	1	0	1	4	1	0	1	2	1	0	1	0
BP	GO:0006351	transcription, DNA-templated	137	1	3	1	12	1	4	1	7	1	0	1	2	1	0	1	10	1	5	1	8	1	0	1	0	1	0	1	8	1	3	1	5	1	0	1	0
BP	GO:0006352	DNA-templated transcription, initiation	54	1	6	1	2	0.837422	5	1	2	1	0	1	1	0.925823	6	1	1	0.280655	7	1	2	1	0	1	0	0.99561	5	1	1	1	3	1	2	1	0	1	0
BP	GO:0006353	DNA-templated transcription, termination	2	1	0	1	0	1	0	1	0	1	0	1	0	1	0	1	0	1	0	1	0	1	0	1	0	1	0	1	0	1	0	1	0	1	0	1	0
BP	GO:0006354	DNA-templated transcription, elongation	304	1	6	1	14	1	0	1	1	1	0	1	6	1	11	1	4	1	0	1	4	1	0	1	0	1	5	1	4	1	0	1	1	1	0	1	0
BP	GO:0006355	regulation of transcription, DNA-templated	3732	1.13002e-15	506	1	511	1.87436e-15	265	1	240	1	21	1	22	2.91281e-14	367	1	427	6.66658e-20	317	1	339	1	8	1	1	3.21084e-12	300	1	322	2.98466e-16	201	1	166	1	1	1	0
BP	GO:0006357	regulation of transcription by RNA polymerase II	8	1	0	1	0	1	0	1	0	1	0	1	0	1	0	1	0	1	0	1	0	1	0	1	0	1	0	1	0	1	0	1	0	1	0	1	0
BP	GO:0006360	transcription by RNA polymerase I	5	1	0	1	0	1	0	1	0	1	0	1	1	1	0	1	0	1	0	1	0	1	0	1	0	1	0	1	0	1	0	1	0	1	0	1	0
BP	GO:0006364	rRNA processing	766	0.0436518	96	1	46	1	26	1	11	1	5	0.00096298	22	1	38	1	25	1	20	1	24	1	1	1	11	1	33	1	15	1	11	1	7	1	0	1	4
BP	GO:0006366	transcription by RNA polymerase II	158	1	7	1	7	1	7	1	0	1	1	1	0	1	3	1	4	1	9	1	1	1	0	1	0	1	2	1	3	1	3	1	0	1	0	1	0
BP	GO:0006367	transcription initiation from RNA polymerase II promoter	8	1	0	1	0	1	0	1	0	1	0	1	0	1	0	1	0	1	0	1	0	1	0	1	0	1	0	1	0	1	0	1	0	1	0	1	0
BP	GO:0006370	7-methylguanosine mRNA capping	12	1	0	1	0	1	0	1	0	1	0	1	0	1	0	1	0	1	0	1	1	1	0	1	0	1	0	1	0	1	0	1	0	1	0	1	0
BP	GO:0006376	mRNA splice site selection	2	0.979073	1	1	0	1	0	0.802657	1	1	0	1	0	1	0	1	0	1	0	1	0	1	0	1	0	1	0	1	0	1	0	1	0	1	0	1	0
BP	GO:0006378	mRNA polyadenylation	17	1	2	1	0	1	0	1	0	1	0	1	0	1	1	1	0	1	0	1	0	1	0	1	0	1	1	1	0	1	0	1	0	1	0	1	0
BP	GO:0006379	mRNA cleavage	4	1	0	1	0	1	0	1	0	1	0	1	0	1	0	1	0	1	0	1	0	1	0	1	0	1	0	1	0	1	0	1	0	1	0	1	0
BP	GO:0006388	tRNA splicing, via endonucleolytic cleavage and ligation	12	1	0	1	1	1	0	1	0	1	0	1	0	1	1	1	0	1	0	1	0	1	0	1	0	1	0	1	0	1	0	1	0	1	0	1	0
BP	GO:0006396	RNA processing	424	1	44	1	17	1	17	1	2	1	0	1	4	1	21	1	7	1	14	1	5	1	0	1	3	1	19	1	4	1	9	1	2	1	0	1	0
BP	GO:0006397	mRNA processing	75	1	4	1	0	1	0	1	0	1	0	1	0	1	4	1	0	1	0	1	0	1	0	1	0	1	2	1	0	1	0	1	0	1	0	1	0
BP	GO:0006399	tRNA metabolic process	110	1	6	1	5	1	3	1	1	1	1	1	1	1	2	1	1	1	1	1	3	1	0	1	0	1	2	1	1	1	0	1	0	1	0	1	0
BP	GO:0006400	tRNA modification	18	1	3	1	2	1	1	1	0	1	0	1	1	0.83757	3	1	1	1	1	1	1	1	0	1	0	0.596433	3	1	1	1	1	1	0	1	0	1	0
BP	GO:0006401	RNA catabolic process	10	1	1	0.276983	4	1	0	1	1	1	0	1	0	1	0	0.164989	4	1	0	1	2	1	0	1	0	1	0	0.0936553	4	1	0	1	0	1	0	1	0
BP	GO:0006402	mRNA catabolic process	8	1	0	1	1	1	0	1	1	1	0	1	0	1	0	1	0	1	0	1	0	1	0	1	0	1	0	1	0	1	0	1	0	1	0	1	0
BP	GO:0006406	mRNA export from nucleus	199	1	8	1	17	1	4	1	7	1	0	2.4866e-14	22	1	5	1	9	1	3	1	6	1	0	1	5	1	5	1	8	1	3	1	5	1	0	1	0
BP	GO:0006407	rRNA export from nucleus	18	1	0	1	3	1	0	1	0	1	0	0.0449215	3	1	0	1	2	1	0	1	1	1	0	4.10357e-05	5	1	0	1	2	1	0	1	0	1	0	0.0669997	2
BP	GO:0006409	tRNA export from nucleus	9	1	0	1	0	1	0	1	0	1	0	1	0	1	0	1	0	1	0	1	0	1	0	1	0	1	0	1	0	1	0	1	0	1	0	1	0
BP	GO:0006412	translation	1169	1	28	1	127	1	8	1	18	1	3	1.19391e-91	127	1	17	1	106	1	3	1	81	1	0	1.31602e-233	209	1	15	1	77	1	3	1	10	1	0	1.40798e-84	64
BP	GO:0006413	translational initiation	150	1	14	1	4	1	5	1	1	1	0	0.00209352	9	1	6	1	3	1	3	1	5	1	0	1	2	1	6	1	3	1	2	1	1	1	0	1	0
BP	GO:0006414	translational elongation	101	1	2	1	11	1	1	1	3	1	1	0.00634759	7	1	1	1	11	1	1	1	5	1	0	1.74426e-24	23	1	1	1	8	1	0	1	1	1	0	7.90423e-06	6
BP	GO:0006415	translational termination	24	0.520398	5	1	0	1	1	1	0	1	0	1	0	1	2	1	0	1	1	1	0	1	0	1	0	1	2	1	0	1	0	1	0	1	0	1	0
BP	GO:0006417	regulation of translation	76	1	7	1	13	1	2	1	7	1	0	0.286018	4	1	6	1	8	1	2	1	9	1	0	1	3	1	4	1	7	1	2	0.593019	7	1	0	0.977265	2
BP	GO:0006418	tRNA aminoacylation for protein translation	56	1	0	1	6	1	0	1	0	1	0	1	2	1	1	1	2	1	0	1	0	1	0	1	0	1	0	1	2	1	0	1	0	1	0	1	0
BP	GO:0006419	alanyl-tRNA aminoacylation	7	1	0	1	0	1	0	1	0	1	0	1	0	1	0	1	0	1	0	1	1	1	0	1	0	1	0	1	0	1	0	1	0	1	0	1	0
BP	GO:0006420	arginyl-tRNA aminoacylation	5	1	0	1	0	1	0	1	0	1	0	1	1	1	0	1	0	1	0	1	0	1	0	1	0	1	0	1	0	1	0	1	0	1	0	1	0
BP	GO:0006421	asparaginyl-tRNA aminoacylation	7	1	1	1	0	1	0	1	0	1	0	1	0	1	1	1	0	1	0	1	0	1	0	1	0	1	1	1	0	1	0	1	0	1	0	1	0
BP	GO:0006422	aspartyl-tRNA aminoacylation	4	1	0	1	0	1	0	1	0	1	0	1	0	1	0	1	0	1	0	1	0	1	0	1	0	1	0	1	0	1	0	1	0	1	0	1	0
BP	GO:0006423	cysteinyl-tRNA aminoacylation	7	1	0	1	1	1	0	1	0	1	0	1	0	1	0	1	1	1	0	1	1	1	0	1	0	1	0	1	0	1	0	1	0	1	0	1	0
BP	GO:0006424	glutamyl-tRNA aminoacylation	10	1	2	1	0	0.743964	2	1	0	1	0	1	0	0.268236	3	1	0	0.219356	3	1	0	1	0	1	0	0.7427	2	1	0	0.499029	2	1	0	1	0	1	0
BP	GO:0006426	glycyl-tRNA aminoacylation	10	1	0	1	0	1	0	1	0	1	0	1	0	1	0	1	0	1	0	1	0	1	0	1	0	1	0	1	0	1	0	1	0	1	0	1	0
BP	GO:0006427	histidyl-tRNA aminoacylation	5	1	1	1	0	1	0	1	0	1	0	1	0	1	0	1	0	1	1	1	0	1	0	1	0	1	0	1	0	1	0	1	0	1	0	1	0
BP	GO:0006430	lysyl-tRNA aminoacylation	5	1	0	1	0	1	0	1	0	1	0	1	0	1	0	1	0	1	0	1	0	1	0	1	0	1	0	1	0	1	0	1	0	1	0	1	0
BP	GO:0006431	methionyl-tRNA aminoacylation	2	1	0	1	0	1	0	1	0	1	0	1	0	1	0	1	0	1	0	1	0	1	0	1	0	1	0	1	0	1	0	1	0	1	0	1	0
BP	GO:0006432	phenylalanyl-tRNA aminoacylation	14	1	0	1	0	1	0	1	0	1	0	1	0	1	0	1	0	1	0	1	0	1	0	1	0	1	0	1	0	1	0	1	0	1	0	1	0
BP	GO:0006434	seryl-tRNA aminoacylation	6	1	0	1	0	1	0	1	0	1	0	1	0	1	0	1	0	1	0	1	0	1	0	1	0	1	0	1	0	1	0	1	0	1	0	1	0
BP	GO:0006435	threonyl-tRNA aminoacylation	6	0.679037	2	1	0	1	0	1	0	1	0	1	0	1	0	1	0	1	0	1	0	1	0	1	0	1	0	1	0	1	0	1	0	1	0	1	0
BP	GO:0006436	tryptophanyl-tRNA aminoacylation	5	1	0	1	0	1	0	1	0	1	0	1	0	1	0	1	0	1	0	1	0	1	0	1	0	1	0	1	0	1	0	1	0	1	0	1	0
BP	GO:0006446	regulation of translational initiation	42	1	4	1	1	1	1	1	0	1	0	1	0	1	0	1	1	1	2	1	0	1	0	1	0	1	0	1	1	1	1	1	0	1	0	1	0
BP	GO:0006457	protein folding	852	0.122573	101	1	100	1	31	0.0228004	84	1	7	1	5	1	58	1	89	1	37	0.770826	87	1	1	1	5	0.671845	54	1	74	1	21	0.665369	50	1	1	1	1
BP	GO:0006464	cellular protein modification process	72	0.0982038	14	1	6	1	1	1	2	1	0	1	0	0.0195355	13	1	3	1	4	1	3	1	0	1	1	0.0877753	10	1	3	1	1	1	0	1	0	1	0
BP	GO:0006465	signal peptide processing	11	1	1	1	0	1	0	1	0	1	0	1	0	1	0	1	0	1	0	1	0	1	0	1	0	1	0	1	0	1	0	1	0	1	0	1	0
BP	GO:0006468	protein phosphorylation	876	1	64	0.00671449	161	1	41	1	44	1	3	1	3	1	56	0.0948489	121	1	51	1	72	1	0	1	1	1	44	0.00736748	108	1	30	1	31	1	0	1	1
BP	GO:0006469	negative regulation of protein kinase activity	2	1	0	0.982512	1	1	0	0.802657	1	1	1	1	0	1	0	0.11967	2	1	0	0.0982751	2	1	0	1	0	1	0	0.850511	1	1	0	0.665369	1	1	0	1	0
BP	GO:0006470	protein dephosphorylation	134	1	7	1	21	1	3	1	7	1	1	1	0	1	5	0.615303	20	1	3	0.830673	16	1	0	1	0	1	4	0.768061	16	1	2	1	6	1	0	1	0
BP	GO:0006471	protein ADP-ribosylation	7	1	0	1	0	1	0	1	0	1	0	1	0	1	0	1	0	1	0	1	0	0.803874	1	1	0	1	0	1	0	1	0	1	0	1	0	1	0
BP	GO:0006473	protein acetylation	59	1	3	1	5	1	2	1	0	1	0	1	0	1	2	0.922643	9	1	1	1	3	1	1	1	0	1	2	1	5	1	1	1	0	1	0	1	0
BP	GO:0006481	C-terminal protein methylation	3	1	0	1	0	1	0	1	0	1	0	1	0	1	0	1	0	1	0	1	0	1	0	1	0	1	0	1	0	1	0	1	0	1	0	1	0
BP	GO:0006486	protein glycosylation	420	1	21	1	8	1	10	1	1	1	1	1	0	1	18	1	5	1	17	1	1	1	0	1	1	1	12	1	2	1	7	1	0	1	0	1	0
BP	GO:0006487	protein N-linked glycosylation	352	1	23	1	12	1	9	1	6	1	2	1	0	1	14	1	10	1	10	1	5	1	0	1	1	1	11	1	6	1	3	1	0	1	0	1	0
BP	GO:0006490	oligosaccharide-lipid intermediate biosynthetic process	4	1	0	1	0	1	0	1	0	1	0	1	0	1	0	1	0	1	0	1	0	1	0	1	0	1	0	1	0	1	0	1	0	1	0	1	0
BP	GO:0006491	N-glycan processing	15	1	0	1	2	1	0	1	2	1	0	1	0	1	1	1	1	1	0	1	1	1	0	1	0	1	0	1	1	1	0	1	1	1	0	1	0
BP	GO:0006493	protein O-linked glycosylation	2	1	0	1	0	1	0	1	0	1	0	1	0	1	0	1	0	1	0	1	0	1	0	1	0	1	0	1	0	1	0	1	0	1	0	1	0
BP	GO:0006497	protein lipidation	2	1	0	1	0	1	0	1	0	1	0	1	0	1	0	1	0	1	0	1	0	1	0	1	0	1	0	1	0	1	0	1	0	1	0	1	0
BP	GO:0006499	N-terminal protein myristoylation	517	1	44	1	30	1	20	1	16	1	2	1	1	1	30	1	24	1	20	1	20	1	1	1	0	1	21	1	20	1	13	1	8	1	0	1	0
BP	GO:0006505	GPI anchor metabolic process	2	1	0	1	0	1	0	1	0	1	0	1	0	1	0	1	0	1	0	1	0	1	0	1	0	1	0	1	0	1	0	1	0	1	0	1	0
BP	GO:0006506	GPI anchor biosynthetic process	14	1	0	1	2	1	0	1	0	1	0	1	0	1	0	1	0	1	0	1	0	1	0	1	0	1	0	1	0	1	0	1	0	1	0	1	0
BP	GO:0006508	proteolysis	646	1	42	2.95935e-07	146	1	13	2.31112e-05	81	1	3	1	8	1	28	4.44097e-06	117	1	17	9.39116e-05	95	1	1	1	3	1	24	5.79749e-08	105	1	6	4.61096e-05	61	1	0	1	0
BP	GO:0006511	ubiquitin-dependent protein catabolic process	918	1	51	1	39	1	29	1	11	1	3	1	3	1	43	1	24	1	35	1	22	1	0	1	4	1	36	1	18	1	19	1	4	1	0	1	0
BP	GO:0006513	protein monoubiquitination	17	1	1	1	0	1	0	1	0	1	0	1	0	1	1	1	0	1	0	1	0	1	0	1	0	1	0	1	0	1	0	1	0	1	0	1	0
BP	GO:0006515	protein quality control for misfolded or incompletely synthesized proteins	11	1	1	0.843331	3	1	0	1	0	1	0	1	0	1	0	1	2	1	0	1	0	1	0	1	0	1	0	1	2	1	0	1	0	1	0	1	0
BP	GO:0006516	glycoprotein catabolic process	12	1	1	1	2	1	1	1	0	1	1	1	0	1	1	1	1	1	0	1	1	1	0	1	0	1	1	1	1	1	0	1	0	1	0	1	0
BP	GO:0006517	protein deglycosylation	1	1	0	1	0	1	0	1	0	1	0	1	0	0.57969	1	1	0	1	0	1	0	1	0	1	0	1	0	1	0	1	0	1	0	1	0	1	0
BP	GO:0006520	cellular amino acid metabolic process	69	1	5	0.0011655	23	1	3	0.240828	10	1	0	1	0	1	4	0.00142068	20	1	2	0.199717	12	1	0	1	0	1	3	0.000736276	18	1	2	0.0965318	9	1	0	1	0
BP	GO:0006521	regulation of cellular amino acid metabolic process	13	0.27264	4	1	0	1	0	1	0	1	0	1	0	1	1	1	1	1	0	1	1	1	0	1	0	1	1	1	0	1	0	1	0	1	0	1	0
BP	GO:0006526	arginine biosynthetic process	23	1	0	1	0	1	0	1	0	1	0	1	1	1	0	1	2	1	1	1	2	1	0	1	1	1	0	1	0	1	0	1	0	1	0	1	0
BP	GO:0006527	arginine catabolic process	2	0.979073	1	1	0	1	0	1	0	1	0	1	0	1	0	1	0	1	0	1	0	1	0	1	0	1	0	1	0	1	0	1	0	1	0	1	0
BP	GO:0006529	asparagine biosynthetic process	8	0.298573	3	1	1	1	1	1	1	1	0	1	1	0.74504	2	1	1	1	0	1	0	1	0	1	0	0.582956	2	1	1	1	0	1	0	1	0	1	0
BP	GO:0006535	cysteine biosynthetic process from serine	3	1	0	1	1	1	0	1	0	1	0	1	0	1	0	1	1	1	0	1	1	1	0	1	0	1	0	1	1	1	0	1	0	1	0	1	0
BP	GO:0006536	glutamate metabolic process	8	1	0	1	1	1	1	1	1	1	1	1	0	1	0	0.949169	2	1	1	0.26359	3	1	0	1	0	1	0	1	1	1	1	1	1	1	0	1	0
BP	GO:0006537	glutamate biosynthetic process	10	0.464902	3	1	2	1	1	0.280681	3	1	0	1	0	0.268236	3	0.03902	5	0.219356	3	0.395392	3	1	0	1	0	0.201644	3	1	2	1	1	0.143761	3	1	0	1	0
BP	GO:0006540	glutamate decarboxylation to succinate	9	1	0	1	1	1	0	1	1	0.280844	2	1	0	1	0	1	2	1	0	0.337837	3	1	0	1	0	1	0	1	1	1	0	1	1	1	0	1	0
BP	GO:0006541	glutamine metabolic process	6	1	0	1	1	1	0	1	1	1	1	1	0	1	0	0.695989	2	1	0	0.129114	3	1	0	1	0	1	0	1	1	1	0	1	1	1	0	1	0
BP	GO:0006542	glutamine biosynthetic process	6	1	0	1	1	1	0	1	1	1	0	1	0	1	0	1	1	1	0	0.582852	2	1	0	1	0	1	0	1	1	1	0	1	1	1	0	1	0
BP	GO:0006544	glycine metabolic process	22	1	2	0.204674	7	1	0	1	2	1	0	1	0	1	2	0.958033	4	1	0	1	3	1	0	1	0	1	2	0.704156	4	1	0	1	0	1	0	1	0
BP	GO:0006546	glycine catabolic process	169	1	16	0.0115793	40	1	10	0.802657	16	1	1	1	0	1	12	0.0307522	32	1	10	0.28784	23	1	0	1	1	1	11	0.0567234	26	0.73676	9	1	10	1	0	1	0
BP	GO:0006551	leucine metabolic process	6	0.679037	2	1	0	1	0	1	0	1	0	1	0	0.489154	2	1	0	1	1	1	0	1	0	1	0	0.401476	2	1	0	1	0	1	0	1	0	1	0
BP	GO:0006552	leucine catabolic process	12	0.001077	7	1	0	0.889952	2	1	0	1	0	1	0	0.107035	4	1	0	1	0	1	1	1	0	1	0	0.0630082	4	1	0	1	0	1	0	1	0	1	0
BP	GO:0006555	methionine metabolic process	14	1	0	0.00424668	8	1	0	1	2	1	0	1	0	1	0	1	1	1	0	1	0	1	0	1	0	1	0	1	1	1	0	1	0	1	0	1	0
BP	GO:0006556	S-adenosylmethionine biosynthetic process	14	1	0	0.00424668	8	1	0	0.557334	3	1	0	1	0	1	0	0.922643	3	1	0	1	2	1	0	1	0	1	0	0.690501	3	1	0	1	1	1	0	1	0
BP	GO:0006559	L-phenylalanine catabolic process	11	0.562409	3	0.356189	4	0.209999	3	0.99031	2	1	1	1	0	1	2	0.628737	3	0.926819	2	0.481418	3	1	0	1	0	0.805946	2	0.438873	3	0.583272	2	0.665369	2	1	0	1	0
BP	GO:0006560	proline metabolic process	3	1	1	1	0	1	1	1	0	1	0	1	0	1	1	1	0	1	1	0.21553	2	1	0	1	0	0.99561	1	1	0	0.989552	1	1	0	1	0	1	0
BP	GO:0006561	proline biosynthetic process	30	1	3	0.617837	7	1	1	0.474352	5	1	0	1	0	1	3	0.622621	6	1	2	0.161748	7	1	0	1	0	1	3	0.690501	5	1	1	0.168552	5	1	0	1	0
BP	GO:0006562	proline catabolic process	7	1	0	0.982512	2	1	0	0.127209	3	1	0	1	0	1	0	0.00692681	5	1	0	0.191767	3	1	0	1	0	1	0	0.690501	2	1	0	0.0594458	3	1	0	1	0
BP	GO:0006563	L-serine metabolic process	24	1	2	0.293836	7	1	0	1	2	1	0	1	0	1	2	0.654511	5	1	0	1	3	1	0	1	0	1	2	0.850511	4	1	0	1	0	1	0	1	0
BP	GO:0006564	L-serine biosynthetic process	8	1	0	0.156681	4	1	0	0.71992	2	1	0	1	0	1	0	0.0888748	4	1	0	0.830673	2	1	0	1	0	1	0	0.0462797	4	1	0	0.457844	2	1	0	1	0
BP	GO:0006566	threonine metabolic process	10	1	2	1	0	0.743964	2	1	0	1	0	1	0	0.923128	2	1	0	1	1	1	0	1	0	1	0	1	1	1	0	1	1	1	0	1	0	1	0
BP	GO:0006567	threonine catabolic process	42	1	2	1	6	1	0	1	4	1	0	1	1	1	0	0.548445	8	1	1	0.539653	7	1	0	1	1	1	0	1	5	1	0	1	3	1	0	1	0
BP	GO:0006568	tryptophan metabolic process	3	1	0	1	1	1	0	0.170502	2	1	0	1	0	1	0	0.0237061	3	1	0	0.21553	2	1	0	1	0	1	0	1	1	1	0	0.104387	2	1	0	1	0
BP	GO:0006569	tryptophan catabolic process	232	0.681678	28	1.69471e-08	70	0.501664	16	0.0014168	34	1	1	1	0	0.463076	22	3.74416e-10	64	1	14	4.38649e-05	45	1	0	1	0	0.254589	20	2.77207e-10	56	0.848344	11	0.0051849	25	1	0	1	0
BP	GO:0006571	tyrosine biosynthetic process	11	1	0	1	2	1	0	1	0	1	0	1	0	1	0	1	2	1	0	1	0	1	0	1	0	1	0	1	2	1	0	1	0	1	0	1	0
BP	GO:0006572	tyrosine catabolic process	11	0.562409	3	1	2	0.209999	3	1	1	1	1	1	0	1	2	1	2	0.926819	2	1	1	1	0	1	0	0.805946	2	1	2	0.583272	2	1	1	1	0	1	0
BP	GO:0006573	valine metabolic process	2	0.11299	2	1	0	1	0	1	0	1	0	1	0	0.088348	2	1	0	0.926819	1	1	0	1	0	1	0	0.0630082	2	1	0	1	0	1	0	1	0	1	0
BP	GO:0006574	valine catabolic process	6	1	1	1	0	1	0	1	0	1	0	1	0	1	0	1	0	1	0	1	1	1	0	1	0	1	0	1	0	1	0	1	0	1	0	1	0
BP	GO:0006580	ethanolamine metabolic process	6	1	0	1	0	1	0	1	0	1	0	1	0	1	0	1	0	1	0	1	0	1	0	1	0	1	0	1	0	1	0	1	0	1	0	1	0
BP	GO:0006593	ornithine catabolic process	2	1	0	1	0	1	0	1	0	1	0	1	0	1	0	1	0	1	0	1	0	1	0	1	0	1	0	1	0	1	0	1	0	1	0	1	0
BP	GO:0006595	polyamine metabolic process	2	0.979073	1	1	0	1	0	1	0	1	0	1	0	1	0	1	0	1	0	1	0	1	0	1	0	1	0	1	0	1	0	1	0	1	0	1	0
BP	GO:0006596	polyamine biosynthetic process	36	1	3	0.10018	11	1	0	0.349104	6	1	0	1	0	1	2	0.575043	7	1	1	1	3	1	0	1	0	1	2	1	5	1	0	1	3	1	0	1	0
BP	GO:0006598	polyamine catabolic process	186	1	13	2.0752e-06	55	1	6	0.00775362	27	1	1	1	1	1	7	0.0011781	40	1	8	0.0452586	29	1	0	1	1	1	7	9.7803e-05	37	1	5	0.0191937	20	1	0	1	0
BP	GO:0006605	protein targeting	94	1	9	1	2	1	3	1	2	1	0	1	0	1	5	1	2	1	3	1	3	1	0	1	0	1	5	1	2	1	1	1	2	1	0	1	0
BP	GO:0006606	protein import into nucleus	339	1	4	1	35	1	3	1	12	1	2	1.07147e-41	51	1	4	1	16	1	0	1	8	1	0	0.596598	8	1	0	1	12	1	0	1	6	1	0	1	2
BP	GO:0006611	protein export from nucleus	12	1	1	1	0	1	0	1	0	1	0	1	0	1	0	1	0	1	0	1	0	1	0	1	0	1	0	1	0	1	0	1	0	1	0	1	0
BP	GO:0006612	protein targeting to membrane	1391	3.21397e-17	237	1	146	0.00561178	87	1	72	1	9	1	5	5.11878e-13	168	1	132	3.40923e-11	133	1	102	1	4	1	2	1.97283e-10	136	1	96	0.0159737	62	1	51	1	0	1	1
BP	GO:0006617	SRP-dependent cotranslational protein targeting to membrane, signal sequence recognition	14	1	1	1	0	1	0	1	0	1	0	1	0	1	0	1	0	1	0	1	0	1	0	1	0	1	0	1	0	1	0	1	0	1	0	1	0
BP	GO:0006621	protein retention in ER lumen	4	1	0	1	0	1	0	1	0	1	0	1	0	1	1	1	0	1	0	1	0	1	0	1	0	1	0	1	0	1	0	1	0	1	0	1	0
BP	GO:0006623	protein targeting to vacuole	497	1	35	1	22	1	10	1	10	1	0	1	0	1	23	1	19	1	16	1	10	1	0	1	1	1	16	1	9	1	5	1	5	1	0	1	0
BP	GO:0006624	vacuolar protein processing	6	1	0	1	0	1	0	1	1	1	0	1	0	1	0	1	0	1	0	1	0	1	0	1	0	1	0	1	0	1	0	1	0	1	0	1	0
BP	GO:0006625	protein targeting to peroxisome	15	1	0	1	0	1	0	1	0	1	0	1	0	1	0	1	0	1	0	1	0	1	0	1	0	1	0	1	0	1	0	1	0	1	0	1	0
BP	GO:0006626	protein targeting to mitochondrion	313	1	12	1	21	1	6	1	2	1	0	3.3125e-06	17	1	8	1	11	1	10	1	4	1	0	1	5	1	7	1	10	1	4	1	1	1	0	1	0
BP	GO:0006629	lipid metabolic process	161	1	6	1	22	1	4	0.3174	18	1	1	1	2	1	2	0.386676	25	1	7	1	15	1	0	1	0	1	1	1	15	1	3	0.96425	11	1	0	1	0
BP	GO:0006631	fatty acid metabolic process	78	1	9	1	11	0.613326	7	1	2	1	1	1	0	1	5	1	10	1	6	1	3	1	0	1	0	1	5	1	6	0.887662	5	1	1	1	0	1	0
BP	GO:0006633	fatty acid biosynthetic process	198	1	12	1	15	1	9	0.71992	19	1	0	1	0	1	9	1	8	1	8	1	21	1	0	1	0	1	6	1	7	1	7	1	11	1	0	1	0
BP	GO:0006635	fatty acid beta-oxidation	577	0.11299	72	1	23	1	29	1	6	1	5	1	0	1	36	1	18	1	31	1	16	1	2	1	1	1	32	1	9	1	19	1	3	1	0	1	0
BP	GO:0006636	unsaturated fatty acid biosynthetic process	229	0.361722	30	0.519425	40	1	12	1	18	1	2	1	0	0.835993	20	0.264978	35	1	13	0.591514	27	1	0	1	1	0.7427	17	0.366556	28	1	9	1	13	1	0	1	0
BP	GO:0006637	acyl-CoA metabolic process	2	1	0	1	0	1	0	1	0	1	0	1	0	1	0	1	0	1	0	1	0	1	0	1	0	1	0	1	0	1	0	1	0	1	0	1	0
BP	GO:0006641	triglyceride metabolic process	5	1	0	1	0	1	0	1	0	1	0	1	0	1	0	1	0	1	0	1	0	1	0	1	0	1	0	1	0	1	0	1	0	1	0	1	0
BP	GO:0006642	triglyceride mobilization	4	1	0	1	0	1	0	1	0	1	0	1	0	1	0	1	0	1	0	1	0	1	0	1	0	1	0	1	0	1	0	1	0	1	0	1	0
BP	GO:0006643	membrane lipid metabolic process	7	1	0	1	0	1	1	1	0	1	0	1	0	1	0	1	0	1	1	1	0	1	0	1	0	1	0	1	0	1	1	1	0	1	0	1	0
BP	GO:0006644	phospholipid metabolic process	11	0.562409	3	1	1	1	1	1	0	1	0	1	0	1	2	1	2	0.926819	2	1	0	1	0	1	0	0.805946	2	1	1	1	1	1	0	1	0	1	0
BP	GO:0006646	phosphatidylethanolamine biosynthetic process	9	1	0	1	1	1	0	1	0	1	0	1	0	1	0	1	1	1	0	1	0	1	0	1	0	1	0	1	1	1	0	1	0	1	0	1	0
BP	GO:0006649	phospholipid transfer to membrane	4	1	0	1	0	1	0	1	0	1	0	1	0	1	0	0.409995	2	1	0	1	0	1	0	1	0	1	0	1	0	1	0	1	0	1	0	1	0
BP	GO:0006650	glycerophospholipid metabolic process	4	1	0	1	0	1	0	1	0	1	0	1	0	1	0	1	0	1	0	1	0	1	0	1	0	1	0	1	0	1	0	1	0	1	0	1	0
BP	GO:0006651	diacylglycerol biosynthetic process	15	1	2	1	0	1	1	1	0	1	0	1	0	1	1	1	0	1	1	1	0	1	0	1	0	1	1	1	0	1	0	1	0	1	0	1	0
BP	GO:0006655	phosphatidylglycerol biosynthetic process	205	0.0854815	31	1	22	1	8	1	5	1	2	1	0	0.0231853	26	1	16	1	11	1	12	1	0	1	2	0.10885	20	1	13	1	6	1	4	1	0	1	0
BP	GO:0006656	phosphatidylcholine biosynthetic process	20	1	0	0.33767	6	1	2	0.922293	3	1	0	1	0	1	0	0.858656	4	1	1	1	3	1	0	1	0	1	0	0.566501	4	1	0	0.567279	3	1	0	1	0
BP	GO:0006659	phosphatidylserine biosynthetic process	6	1	0	1	0	1	0	0.499996	2	1	0	1	0	1	0	1	0	1	0	0.582852	2	1	0	1	0	1	0	1	0	1	0	0.303667	2	1	0	1	0
BP	GO:0006661	phosphatidylinositol biosynthetic process	269	1	27	1	20	1	11	1	12	1	3	1	0	1	10	1	18	1	13	1	14	1	0	1	1	1	10	1	11	1	7	1	7	1	0	1	0
BP	GO:0006665	sphingolipid metabolic process	10	0.464902	3	1	0	0.743964	2	1	0	1	0	1	0	0.923128	2	1	0	0.873634	2	1	0	1	0	1	0	0.7427	2	1	0	0.499029	2	1	0	1	0	1	0
BP	GO:0006671	phytosphingosine metabolic process	5	1	0	1	0	1	0	1	0	1	0	1	0	1	0	1	0	1	0	1	1	1	0	1	0	1	0	1	0	1	0	1	0	1	0	1	0
BP	GO:0006672	ceramide metabolic process	2	1	0	1	0	1	0	1	0	1	0	1	0	1	0	1	0	1	0	1	0	1	0	1	0	1	0	1	0	1	0	1	0	1	0	1	0
BP	GO:0006694	steroid biosynthetic process	16	1	1	1	2	1	0	1	1	1	0	1	0	1	1	1	2	1	0	1	0	1	0	1	0	1	1	1	2	1	0	1	0	1	0	1	0
BP	GO:0006720	isoprenoid metabolic process	6	1	0	0.845832	2	1	0	1	0	1	0	1	0	1	0	1	1	1	0	1	0	1	0	1	0	1	0	1	1	1	0	1	0	1	0	1	0
BP	GO:0006721	terpenoid metabolic process	2	0.979073	1	1	0	0.871675	1	1	0	1	0	1	0	0.898895	1	1	0	1	0	1	0	1	0	1	0	0.772216	1	1	0	1	0	1	0	1	0	1	0
BP	GO:0006723	cuticle hydrocarbon biosynthetic process	10	1	0	0.276983	4	1	0	1	1	1	0	1	0	1	0	0.164989	4	1	0	1	1	1	0	1	0	1	0	0.366556	3	1	0	1	0	1	0	1	0
BP	GO:0006725	cellular aromatic compound metabolic process	8	1	0	0.51809	3	1	0	0.71992	2	1	0	1	0	1	0	0.949169	2	1	0	0.0526081	4	1	0	1	0	1	0	0.830378	2	1	0	0.457844	2	1	0	1	0
BP	GO:0006730	one-carbon metabolic process	56	1	0	1.91111e-09	29	1	1	0.000961372	14	1	0	1	1	1	0	0.000793124	18	1	2	0.00867281	14	1	0	1	0	1	0	3.56487e-05	18	1	0	0.000135353	13	1	0	1	0
BP	GO:0006733	oxidoreduction coenzyme metabolic process	131	1	15	0.156354	28	0.631742	10	1	10	1	1	1	0	0.941361	12	0.111844	24	1	9	0.374291	18	1	0	1	1	0.677014	11	0.202889	19	0.245837	9	1	6	1	0	1	0
BP	GO:0006739	NADP metabolic process	6	1	0	1	0	1	0	1	0	1	0	1	0	1	0	1	0	1	1	1	0	1	0	1	0	1	0	1	0	1	0	1	0	1	0	1	0
BP	GO:0006741	NADP biosynthetic process	10	1	2	1	2	1	1	0.00894345	5	1	0	1	0	0.923128	2	1	2	1	1	1	2	1	0	1	0	0.7427	2	1	2	1	1	0.633393	2	1	0	1	0
BP	GO:0006744	ubiquinone biosynthetic process	72	1	2	1	6	1	0	0.802657	8	1	1	1	0	1	1	1	2	1	1	0.425723	11	1	0	1	1	1	1	1	2	1	0	0.876862	6	1	0	1	0
BP	GO:0006749	glutathione metabolic process	24	1	4	1	4	1	0	1	2	1	0	1	0	1	3	1	3	1	0	1	3	1	0	1	0	0.900076	3	1	2	1	0	1	2	1	0	1	0
BP	GO:0006750	glutathione biosynthetic process	13	1	0	1	3	1	0	1	2	1	0	1	0	1	0	0.830856	3	1	1	1	2	1	0	1	0	1	0	1	2	1	0	1	1	1	0	1	0
BP	GO:0006751	glutathione catabolic process	10	1	0	1	1	1	0	1	0	1	0	1	0	1	1	1	0	1	0	1	0	1	0	1	0	1	0	1	0	1	0	1	0	1	0	1	0
BP	GO:0006753	nucleoside phosphate metabolic process	12	0.659473	3	1	2	0.000331275	6	1	2	1	0	1	0	0.388713	3	1	2	0.00697298	5	1	1	1	0	1	0	0.285069	3	1	2	0.000931611	5	1	1	1	0	1	0
BP	GO:0006754	ATP biosynthetic process	12	1	1	1	0	1	0	1	0	1	0	1	0	1	1	1	0	1	0	1	0	1	0	1	0	1	1	1	0	1	0	1	0	1	0	1	0
BP	GO:0006760	folic acid-containing compound metabolic process	5	1	0	1	1	1	0	0.0524224	3	1	0	1	0	1	0	0.574338	2	1	0	0.0868169	3	1	0	1	0	1	0	1	1	1	0	0.230446	2	1	0	1	0
BP	GO:0006766	vitamin metabolic process	131	1	15	0.156354	28	0.631742	10	1	10	1	1	1	0	0.941361	12	0.111844	24	1	9	0.374291	18	1	0	1	1	0.677014	11	0.202889	19	0.245837	9	1	6	1	0	1	0
BP	GO:0006772	thiamine metabolic process	4	1	1	0.51809	2	1	0	1	0	1	0	1	0	1	1	0.409995	2	1	0	1	0	1	0	1	0	1	1	0.305813	2	1	0	1	0	1	0	1	0
BP	GO:0006777	Mo-molybdopterin cofactor biosynthetic process	16	1	2	1	0	1	1	1	0	1	1	1	0	1	1	1	0	1	2	1	0	1	0	1	0	1	0	1	0	1	1	1	0	1	0	1	0
BP	GO:0006778	porphyrin-containing compound metabolic process	3	0.0162871	3	1	0	1	1	1	0	1	0	1	0	1	1	1	0	0.160741	2	1	0	1	0	1	0	0.99561	1	1	0	0.989552	1	1	0	1	0	1	0
BP	GO:0006779	porphyrin-containing compound biosynthetic process	35	1	2	1	3	1	1	1	1	1	0	1	1	1	2	1	1	1	2	1	1	1	0	1	0	1	1	1	1	1	1	1	1	1	0	1	0
BP	GO:0006780	uroporphyrinogen III biosynthetic process	2	1	0	1	0	1	0	1	0	1	0	1	0	1	0	1	0	1	0	1	0	1	0	1	0	1	0	1	0	1	0	1	0	1	0	1	0
BP	GO:0006783	heme biosynthetic process	60	1	6	1	8	1	1	1	2	1	0	1	1	1	2	1	7	1	0	1	3	1	0	1	0	1	1	1	6	1	0	1	1	1	0	1	0
BP	GO:0006788	heme oxidation	8	1	0	1	0	1	0	1	0	1	0	1	0	1	0	1	0	1	0	1	0	1	0	1	0	1	0	1	0	1	0	1	0	1	0	1	0
BP	GO:0006790	sulfur compound metabolic process	54	1	6	1	5	1	1	1	0	1	0	1	0	0.523725	7	1	5	1	2	1	3	1	0	1	1	0.99561	5	1	5	1	1	1	0	1	0	1	0
BP	GO:0006792	regulation of sulfur utilization	5	0.101145	3	1	0	1	0	1	1	1	0	1	0	0.380712	2	1	0	1	0	1	1	1	0	1	0	1	1	1	0	1	0	1	1	1	0	1	0
BP	GO:0006793	phosphorus metabolic process	3	1	1	1	0	1	0	1	0	1	0	1	0	1	0	1	0	1	0	1	0	1	0	1	0	1	0	1	0	1	0	1	0	1	0	1	0
BP	GO:0006796	phosphate-containing compound metabolic process	2	1	0	1	0	1	0	1	0	1	0	1	0	1	0	1	0	1	0	1	0	1	0	1	0	1	0	1	0	1	0	1	0	1	0	1	0
BP	GO:0006805	xenobiotic metabolic process	14	1	0	0.621229	4	1	2	1	0	1	0	1	0	1	1	0.922643	3	1	1	1	1	1	0	1	0	1	0	1	2	1	1	1	0	1	0	1	0
BP	GO:0006807	nitrogen compound metabolic process	48	1	3	0.663594	10	1	3	0.0817388	9	1	0	1	0	1	4	0.139016	11	1	4	0.460234	8	1	0	1	0	1	2	1	6	1	3	0.116454	7	1	0	1	0
BP	GO:0006808	regulation of nitrogen utilization	10	1	0	1	1	1	0	1	0	1	0	1	0	1	0	1	1	1	0	1	0	1	0	1	0	1	0	1	1	1	0	1	0	1	0	1	0
BP	GO:0006809	nitric oxide biosynthetic process	17	0.190293	5	1	3	1	1	0.276126	4	1	0	1	0	0.0152986	6	0.626739	4	0.036588	5	0.919059	3	1	0	1	0	0.0415666	5	0.904099	3	1	1	0.428759	3	1	0	1	0
BP	GO:0006810	transport	476	1	44	0.0287577	91	1	16	0.0228004	52	1	1	1	6	1	33	6.19266e-05	88	1	26	0.192804	57	1	1	1	3	1	27	0.00525281	66	1	15	0.0387048	38	1	0	1	0
BP	GO:0006812	cation transport	95	1	5	1	16	1	3	0.802657	10	1	1	1	0	1	4	1	11	1	4	1	4	7.01589e-05	6	1	0	1	2	1	5	1	3	1	2	1	0	1	0
BP	GO:0006813	potassium ion transport	90	1	11	1	11	1	6	1	4	1	0	1	0	0.906332	9	1	6	0.817356	8	1	7	1	1	1	0	1	7	1	4	1	5	1	2	1	0	1	0
BP	GO:0006814	sodium ion transport	74	0.918561	10	0.0381268	20	1	5	1	4	1	0	1	0	1	4	0.264569	14	1	3	1	6	1	0	1	0	1	4	0.0694269	14	1	3	1	4	1	0	1	0
BP	GO:0006816	calcium ion transport	476	1	29	0.000134525	104	1	11	0.000204447	61	1	2	1	0	1	19	0.175878	68	1	16	0.0441787	62	1	2	1	1	1	14	0.097021	58	1	9	1.25885e-05	51	1	0	1	0
BP	GO:0006817	phosphate ion transport	79	1	7	1	10	1	5	1	2	1	1	1	0	1	3	1	9	0.269963	9	1	1	1	0	1	0	1	3	1	4	1	4	1	0	1	0	1	0
BP	GO:0006820	anion transport	163	1	10	1	18	1	3	1	5	1	0	1	4	1	7	1	13	1	8	1	2	1	0	1	0	1	6	1	10	1	2	1	1	1	0	1	0
BP	GO:0006821	chloride transport	20	1	2	0.0525136	8	1	2	0.0361123	6	1	0	1	0	1	2	0.164989	6	1	2	0.60869	4	1	0	1	0	1	2	0.0784388	6	1	2	0.171889	4	1	0	1	0
BP	GO:0006824	cobalt ion transport	5	1	0	1	0	1	0	1	0	1	0	1	0	1	0	1	0	1	0	1	0	1	0	1	0	1	0	1	0	1	0	1	0	1	0	1	0
BP	GO:0006825	copper ion transport	36	1	2	0.0139153	13	1	1	0.71992	5	1	0	1	0	1	3	0.00803264	12	1	2	0.0597389	9	1	0	1	0	1	1	0.00503975	11	1	1	0.665369	4	1	0	1	0
BP	GO:0006826	iron ion transport	318	1	22	1.90887e-17	109	1	10	4.83928e-12	64	1	1	0.0721631	10	1	18	1.14132e-09	78	1	20	2.28319e-09	68	0.265223	4	1	0	1	18	1.06792e-08	65	1	10	0.000142017	36	1	0	1	0
BP	GO:0006828	manganese ion transport	34	1	1	0.156354	10	1	0	0.110939	7	1	0	1	0	1	1	1	4	1	0	0.000816502	12	1	0	1	0	1	1	1	4	1	0	0.0241333	7	1	0	1	0
BP	GO:0006829	zinc ion transport	35	1	0	0.0106861	13	1	0	0.127209	7	1	0	1	0	1	0	1	5	1	0	0.0178212	10	0.00072176	4	1	0	1	0	0.938009	5	1	0	0.665369	4	1	0	1	0
BP	GO:0006833	water transport	551	1	44	0.00203235	111	0.871675	30	0.00324703	63	1	5	1	4	1	36	0.0311181	84	0.356479	38	0.000405133	81	0.02989	7	1	3	1	33	0.0184732	71	1	20	0.000772129	50	1	0	1	1
BP	GO:0006835	dicarboxylic acid transport	12	0.659473	3	1	2	1	1	1	1	1	0	1	0	1	0	1	1	1	0	1	2	1	0	1	0	1	0	1	1	1	0	1	1	1	0	1	0
BP	GO:0006839	mitochondrial transport	124	0.145331	20	1	18	1	7	0.451595	14	1	0	1	4	0.215024	15	0.165313	22	1	8	1	11	1	0	1	0	0.10877	14	0.52607	16	1	6	0.912522	9	1	0	1	0
BP	GO:0006848	pyruvate transport	4	1	0	1	1	1	0	1	0	1	0	1	0	1	0	1	1	1	0	1	0	1	0	1	0	1	0	1	1	1	0	1	0	1	0	1	0
BP	GO:0006849	plasma membrane pyruvate transport	4	1	0	0.102204	3	1	0	0.273715	2	1	0	1	0	1	0	0.409995	2	1	0	0.337837	2	1	0	1	0	1	0	0.305813	2	1	0	0.164787	2	1	0	1	0
BP	GO:0006855	drug transmembrane transport	35	1	1	0.0843343	11	1	2	1	4	1	1	1	0	1	0	0.00624832	12	1	1	1	4	1	0	1	0	1	0	0.0135533	10	1	1	1	2	1	0	1	0
BP	GO:0006857	oligopeptide transport	315	1	19	0.000206677	74	1	15	0.622377	29	1	1	1	2	1	21	1.21818e-07	72	1	17	0.030713	45	1	0	1	2	1	15	1.95363e-05	56	1	12	0.65964	21	1	0	1	0
BP	GO:0006858	extracellular transport	5	1	0	1	0	1	0	1	0	1	0	1	0	1	0	1	0	1	0	1	0	1	0	1	0	1	0	1	0	1	0	1	0	1	0	1	0
BP	GO:0006862	nucleotide transport	120	1	10	1	13	1	2	1	4	1	0	1	2	1	7	1	10	1	8	1	0	1	0	1	0	1	6	1	7	1	2	1	0	1	0	1	0
BP	GO:0006863	purine nucleobase transport	142	1	9	0.000139635	41	1	2	1	11	1	2	1	0	1	6	0.318222	23	1	6	0.809684	17	1	0	1	0	1	6	0.139127	21	1	2	1	8	1	0	1	0
BP	GO:0006865	amino acid transport	418	0.00345481	63	0.000494474	91	0.209999	28	1	31	1	3	1	4	0.0181068	45	0.0981056	63	0.00124504	41	0.60869	46	1	1	1	5	0.0377937	37	0.0360616	55	0.306352	20	1	23	1	1	1	1
BP	GO:0006869	lipid transport	304	1	18	8.21689e-06	77	1	8	0.0186673	37	1	2	1	3	1	11	5.66506e-12	81	1	15	0.0622057	42	1	0	1	3	1	10	2.83593e-08	62	1	5	0.0387048	27	1	0	1	1
BP	GO:0006873	cellular ion homeostasis	15	1	0	0.00687436	8	1	0	1	1	1	0	1	0	1	0	0.000280042	9	1	1	0.337837	4	1	0	1	0	1	0	0.00387681	7	1	0	1	1	1	0	1	0
BP	GO:0006874	cellular calcium ion homeostasis	51	1	2	0.0494901	15	1	0	1	5	1	0	1	0	1	1	0.370009	10	1	1	1	6	1	0	1	0	1	0	0.274809	9	1	0	0.678916	5	1	0	1	0
BP	GO:0006875	cellular metal ion homeostasis	26	1	0	1	3	1	0	0.310987	5	1	0	1	0	1	1	1	3	1	0	0.534466	5	1	0	1	0	1	0	1	3	1	0	0.110897	5	1	0	1	0
BP	GO:0006878	cellular copper ion homeostasis	26	1	3	0.707768	6	1	0	1	3	1	0	1	0	1	0	1	3	1	0	1	3	0.159807	2	1	0	1	0	1	3	1	0	1	2	1	0	1	0
BP	GO:0006879	cellular iron ion homeostasis	36	1	2	0.00126297	15	1	0	0.0522731	8	1	0	0.00284976	5	1	1	0.0652213	10	1	0	1.09232e-05	15	1	0	1	0	1	1	0.124357	8	1	0	0.10757	6	1	0	1	0
BP	GO:0006880	intracellular sequestering of iron ion	2	1	0	0.982512	1	1	0	0.802657	1	1	0	1	0	1	0	1	0	1	0	1	0	1	0	1	0	1	0	1	0	1	0	1	0	1	0	1	0
BP	GO:0006882	cellular zinc ion homeostasis	69	1	6	1	4	1	1	1	3	1	0	1	0	1	5	1	2	1	3	1	3	0.563895	2	1	0	1	3	1	2	1	1	1	2	1	0	1	0
BP	GO:0006883	cellular sodium ion homeostasis	3	1	0	0.33767	2	1	0	0.170502	2	1	0	1	0	1	0	0.0237061	3	1	0	0.21553	2	1	0	1	0	1	0	0.202751	2	1	0	0.104387	2	1	0	1	0
BP	GO:0006884	cell volume homeostasis	4	1	1	1	0	1	0	1	0	1	0	1	0	1	1	1	0	1	0	1	0	1	0	1	0	1	0	1	0	1	0	1	0	1	0	1	0
BP	GO:0006885	regulation of pH	11	1	0	1	2	1	1	1	1	1	0	1	0	1	0	1	2	1	1	1	0	1	0	1	0	1	0	1	1	1	1	1	0	1	0	1	0
BP	GO:0006886	intracellular protein transport	275	1	19	1	27	1	10	1	14	1	1	1	0	1	20	1	21	1	10	1	21	1	0	1	1	1	15	1	17	1	5	1	11	1	0	1	0
BP	GO:0006887	exocytosis	3	1	0	0.33767	2	1	0	1	0	1	0	1	0	1	0	1	0	1	0	1	0	1	0	1	0	1	0	1	0	1	0	1	0	1	0	1	0
BP	GO:0006888	ER to Golgi vesicle-mediated transport	377	1	23	1	43	1	8	1	14	1	1	1	3	1	15	1	32	1	11	1	12	1	0	1	1	1	13	1	28	1	5	1	7	1	0	1	0
BP	GO:0006890	retrograde vesicle-mediated transport, Golgi to ER	25	1	0	1	0	1	1	1	0	1	1	1	0	1	1	1	0	1	0	1	0	1	0	1	0	1	0	1	0	1	0	1	0	1	0	1	0
BP	GO:0006891	intra-Golgi vesicle-mediated transport	210	1	22	1	10	1	12	1	4	1	1	1	0	0.928062	18	1	10	1	12	1	8	1	0	1	0	0.93485	15	1	7	1	6	1	4	1	0	1	0
BP	GO:0006896	Golgi to vacuole transport	29	1	0	1	0	1	0	1	1	1	0	1	0	1	1	1	1	1	0	1	2	1	0	1	0	1	0	1	0	1	0	1	0	1	0	1	0
BP	GO:0006897	endocytosis	69	1	2	1	7	1	1	1	1	1	0	1	0	1	1	1	6	1	0	1	2	1	0	1	0	1	1	1	5	1	0	1	1	1	0	1	0
BP	GO:0006898	receptor-mediated endocytosis	3	0.249256	2	1	0	1	1	1	0	1	0	1	0	0.191058	2	1	0	0.160741	2	1	0	1	0	1	0	0.142793	2	1	0	0.989552	1	1	0	1	0	1	0
BP	GO:0006900	vesicle budding from membrane	8	1	0	1	0	1	0	1	0	1	0	1	0	1	0	1	0	1	0	1	0	1	0	1	0	1	0	1	0	1	0	1	0	1	0	1	0
BP	GO:0006904	vesicle docking involved in exocytosis	63	0.00151721	17	1	9	1	2	1	6	1	0	1	0	0.000406505	15	1	5	1	5	1	4	1	0	1	0	0.00368797	12	1	4	1	2	1	2	1	0	1	0
BP	GO:0006907	pinocytosis	4	1	0	0.00671449	4	1	0	0.0261589	3	1	0	1	0	1	0	0.0652213	3	1	0	0.337837	2	1	0	1	0	1	0	0.0396722	3	1	0	0.164787	2	1	0	1	0
BP	GO:0006913	nucleocytoplasmic transport	66	1	3	1	6	1	0	1	3	1	0	0.192287	4	1	2	1	4	1	1	1	6	1	0	1	0	1	2	1	4	1	0	1	2	1	0	1	0
BP	GO:0006914	autophagy	229	1.40138e-05	47	1	18	0.956227	14	1	7	1	2	1	0	0.0263113	28	1	18	0.198512	20	1	15	1	1	1	0	0.229365	20	1	14	0.499029	12	1	6	1	0	1	0
BP	GO:0006949	syncytium formation	83	1	2	1.80359e-12	41	1	1	0.00199159	17	1	2	1	2	1	0	5.34842e-11	35	1	2	1.89841e-07	27	1	0	1	0	1	0	2.98902e-12	33	1	1	0.000482544	15	1	0	1	0
BP	GO:0006952	defense response	855	1	83	1	102	0.119056	52	1	61	1	9	1	3	0.0767068	76	1	77	2.15166e-05	77	1	75	1	1	1	0	0.679865	54	1	65	0.0212593	42	1	45	1	0	1	0
BP	GO:0006954	inflammatory response	14	1	0	0.265144	5	1	0	1	1	1	0	1	0	1	0	0.409995	4	1	0	1	1	1	0	1	1	1	0	0.248841	4	1	0	1	1	1	0	1	0
BP	GO:0006955	immune response	32	1	2	1	4	1	2	1	1	1	0	1	0	0.989815	4	1	2	1	2	1	1	1	0	1	0	1	2	1	1	1	2	1	1	1	0	1	0
BP	GO:0006970	response to osmotic stress	465	0.00449723	68	1	59	0.116683	32	0.0152523	52	1	3	1	5	0.00988762	50	1	48	0.000769341	45	0.700366	50	1	3	1	1	0.00792216	43	1	43	0.00997823	28	0.0178688	39	1	0	1	1
BP	GO:0006972	hyperosmotic response	422	1	30	0.51809	70	0.332865	27	1	32	1	3	1	4	1	27	1	42	0.209022	32	1	39	1	0	1	3	1	24	1	36	0.766787	18	1	22	1	0	1	1
BP	GO:0006974	cellular response to DNA damage stimulus	51	1	0	1	7	1	0	1	0	1	0	1	0	1	0	1	6	1	2	1	2	1	0	1	0	1	0	1	5	1	0	1	0	1	0	1	0
BP	GO:0006979	response to oxidative stress	593	3.63639e-09	107	1	53	0.108755	39	0.71992	50	1	7	1	5	1.76836e-06	75	1	51	4.28451e-05	58	1	58	1	1	1	5	5.98463e-06	63	1	35	0.152361	28	0.852205	35	1	0	1	1
BP	GO:0006982	response to lipid hydroperoxide	4	1	1	1	0	1	0	1	0	1	0	1	0	1	0	1	0	1	0	1	0	1	0	1	0	1	0	1	0	1	0	1	0	1	0	1	0
BP	GO:0006983	ER overload response	5	1	0	1	0	1	0	1	0	1	0	1	0	1	0	1	0	1	0	1	0	1	0	1	0	1	0	1	0	1	0	1	0	1	0	1	0
BP	GO:0006984	ER-nucleus signaling pathway	47	1	5	1	3	1	2	1	2	1	0	1	0	1	5	1	4	1	4	1	2	1	0	1	0	1	3	1	1	1	2	1	2	1	0	1	0
BP	GO:0006986	response to unfolded protein	2	1	0	1	0	1	0	1	0	1	0	1	0	1	0	1	0	1	0	1	0	1	0	1	0	1	0	1	0	1	0	1	0	1	0	1	0
BP	GO:0006990	positive regulation of transcription from RNA polymerase II promoter involved in unfolded protein response	2	1	0	1	0	1	0	1	0	1	0	1	0	1	0	1	0	1	0	1	0	1	0	1	0	1	0	1	0	1	0	1	0	1	0	1	0
BP	GO:0006995	cellular response to nitrogen starvation	109	0.864038	14	1	18	1	7	1	8	1	0	1	0	1	10	0.969798	15	1	7	1	12	1	0	1	1	1	7	1	11	1	4	1	5	1	0	1	0
BP	GO:0006997	nucleus organization	25	1	2	1	0	1	0	1	0	1	0	1	0	1	1	1	0	1	0	1	1	1	0	1	0	1	1	1	0	1	0	1	0	1	0	1	0
BP	GO:0007000	nucleolus organization	74	1	3	0.138708	18	1	3	1	5	1	1	1	1	1	3	0.413633	13	1	3	0.157202	13	1	0	1	1	1	1	0.421802	11	1	3	1	3	1	0	1	0
BP	GO:0007004	telomere maintenance via telomerase	1	1	0	1	0	1	0	1	0	1	0	1	0	1	0	1	0	1	0	1	0	1	0	1	0	1	0	1	0	1	0	1	0	1	0	1	0
BP	GO:0007005	mitochondrion organization	41	1	0	1	3	1	0	1	1	1	0	1	0	1	0	1	2	1	0	1	1	1	0	1	0	1	0	1	2	1	0	1	1	1	0	1	0
BP	GO:0007009	plasma membrane organization	8	1	0	1	0	1	0	1	0	1	0	1	0	1	0	1	0	1	0	1	0	1	0	1	0	1	0	1	0	1	0	1	0	1	0	1	0
BP	GO:0007010	cytoskeleton organization	408	1	34	1	56	0.517761	25	1	20	1	0	1	1	0.663312	34	1	32	0.425884	29	1	16	1	0	1	2	0.406821	30	1	30	0.253582	20	1	7	1	0	1	0
BP	GO:0007015	actin filament organization	130	1	9	0.0329624	31	1	5	1	12	1	1	1	0	1	5	1	16	1	7	1	6	1	0	1	1	1	4	0.884087	15	1	5	1	5	1	0	1	0
BP	GO:0007017	microtubule-based process	71	1	2	0.431054	15	1	2	1	5	1	0	1	0	1	3	0.353125	13	1	1	1	4	1	0	1	1	1	2	0.345765	11	1	1	1	2	1	0	1	0
BP	GO:0007020	microtubule nucleation	191	1	0	3.48246e-07	58	1	0	0.802657	18	1	1	1	0	1	0	0.0123057	37	1	0	0.459118	24	1	0	1	0	1	0	0.000918586	35	1	0	0.876862	13	1	0	1	0
BP	GO:0007021	tubulin complex assembly	18	1	2	1	3	1	1	1	0	1	0	1	0	1	0	1	1	1	1	1	0	1	0	1	0	1	0	1	1	1	1	1	0	1	0	1	0
BP	GO:0007026	negative regulation of microtubule depolymerization	5	1	0	1	0	1	0	1	0	1	0	1	0	1	0	1	0	1	0	1	0	1	0	1	0	1	0	1	0	1	0	1	0	1	0	1	0
BP	GO:0007029	endoplasmic reticulum organization	13	0.742772	3	1	1	1	1	1	2	1	0	1	0	0.464323	3	1	0	1	1	0.626039	3	1	0	1	0	0.99561	2	1	0	1	1	0.852205	2	1	0	1	0
BP	GO:0007030	Golgi organization	763	1	48	0.00342516	145	1	32	0.00284928	82	1	5	1	4	1	36	0.483905	98	1	38	0.266113	85	1	2	1	4	1	32	0.211028	84	1	23	0.00193806	62	1	0	1	1
BP	GO:0007031	peroxisome organization	92	1	7	1	7	1	2	1	2	1	0	1	0	1	4	1	6	1	1	1	3	1	0	1	0	1	3	1	4	1	1	1	2	1	0	1	0
BP	GO:0007032	endosome organization	19	1	0	1	4	1	0	0.84207	3	1	0	1	0	1	0	0.765649	4	1	0	0.224969	5	1	0	1	0	1	0	0.523712	4	1	0	0.513146	3	1	0	1	0
BP	GO:0007033	vacuole organization	219	1	4	1	10	1	1	1	3	1	0	1	0	1	0	1	6	1	4	1	5	1	0	1	1	1	0	1	5	1	1	1	1	1	0	1	0
BP	GO:0007034	vacuolar transport	23	1	0	1	1	1	0	1	1	1	0	1	0	1	0	1	0	1	0	1	0	1	0	1	0	1	0	1	0	1	0	1	0	1	0	1	0
BP	GO:0007043	cell-cell junction assembly	17	1	0	7.44987e-05	11	1	0	9.97719e-12	14	1	0	1	0	1	0	0.264978	5	1	0	1.51278e-10	14	1	0	1	0	1	0	0.136783	5	1	0	3.5897e-11	13	1	0	1	0
BP	GO:0007050	cell cycle arrest	8	1	0	1	1	1	0	1	0	1	0	1	0	1	0	1	0	1	0	1	0	1	0	1	0	1	0	1	0	1	0	1	0	1	0	1	0
BP	GO:0007059	chromosome segregation	83	1	4	1	11	1	1	1	1	1	0	1	0	1	2	1	6	1	1	1	4	1	0	1	0	1	1	1	5	1	0	1	1	1	0	1	0
BP	GO:0007062	sister chromatid cohesion	370	1	18	1	41	1	7	1	7	1	0	1	2	1	13	1	22	1	9	1	17	1	0	1	2	1	11	1	19	1	2	1	5	1	0	1	0
BP	GO:0007065	male meiosis sister chromatid cohesion	3	1	1	1	0	1	1	1	0	1	0	1	0	1	0	1	0	1	0	1	0	1	0	1	0	1	0	1	0	1	0	1	0	1	0	1	0
BP	GO:0007066	female meiosis sister chromatid cohesion	3	1	1	1	0	1	1	1	0	1	0	1	0	1	0	1	0	1	0	1	0	1	0	1	0	1	0	1	0	1	0	1	0	1	0	1	0
BP	GO:0007076	mitotic chromosome condensation	1	1	0	1	0	1	0	1	0	1	0	1	0	1	0	1	0	1	0	1	0	1	0	1	0	1	0	1	0	1	0	1	0	1	0	1	0
BP	GO:0007088	regulation of mitotic nuclear division	2	1	0	0.982512	1	1	0	1	0	1	0	1	0	1	0	0.922643	1	1	0	1	0	1	0	1	0	1	0	0.850511	1	1	0	1	0	1	0	1	0
BP	GO:0007093	mitotic cell cycle checkpoint	1	0.654476	1	1	0	1	0	1	0	1	0	1	0	0.57969	1	1	0	1	0	1	0	1	0	1	0	0.527419	1	1	0	1	0	1	0	1	0	1	0
BP	GO:0007094	mitotic spindle assembly checkpoint	11	1	0	0.843331	3	1	0	0.349104	3	1	0	1	0	1	0	0.628737	3	1	0	0.139892	4	1	0	1	0	1	0	0.438873	3	1	0	0.169688	3	1	0	1	0
BP	GO:0007112	male meiosis cytokinesis	4	1	1	1	1	1	1	1	0	1	0	1	0	0.268236	2	1	0	1	0	1	0	1	0	1	0	1	1	1	0	1	0	1	0	1	0	1	0
BP	GO:0007113	endomitotic cell cycle	2	1	0	0.982512	1	1	0	1	0	1	0	1	0	1	0	0.922643	1	1	0	1	0	1	0	1	0	1	0	0.850511	1	1	0	1	0	1	0	1	0
BP	GO:0007129	synapsis	151	1	7	0.971202	25	1	0	1	3	1	0	1	0	1	4	1	10	1	2	1	6	1	0	1	1	1	3	1	10	1	0	1	1	1	0	1	0
BP	GO:0007130	synaptonemal complex assembly	1	1	0	0.674201	1	1	0	1	0	1	0	1	0	1	0	1	0	1	0	1	0	1	0	1	0	1	0	1	0	1	0	1	0	1	0	1	0
BP	GO:0007131	reciprocal meiotic recombination	299	1	14	1	45	1	3	1	7	1	0	1	2	1	11	1	27	1	8	1	16	1	0	1	1	1	8	1	25	1	1	1	5	1	0	1	0
BP	GO:0007135	meiosis II	2	1	0	1	0	1	0	1	0	1	1	1	0	1	0	1	0	1	0	1	0	1	0	1	0	1	0	1	0	1	0	1	0	1	0	1	0
BP	GO:0007140	male meiotic nuclear division	45	1	3	1	4	1	0	1	0	1	1	1	0	1	1	1	2	1	1	1	2	1	0	1	0	1	1	1	2	1	0	1	0	1	0	1	0
BP	GO:0007141	male meiosis I	2	1	0	1	0	1	0	1	0	1	0	1	0	1	0	1	0	1	0	1	0	1	0	1	0	1	0	1	0	1	0	1	0	1	0	1	0
BP	GO:0007142	male meiosis II	2	1	0	1	0	1	0	1	0	1	0	1	0	1	0	0.922643	1	1	0	0.836012	1	1	0	1	0	1	0	1	0	1	0	1	0	1	0	1	0
BP	GO:0007143	female meiotic nuclear division	14	1	2	1	0	1	0	1	0	1	0	1	0	1	1	1	0	1	1	1	0	1	0	1	0	1	1	1	0	1	0	1	0	1	0	1	0
BP	GO:0007154	cell communication	220	6.3134e-07	49	1	17	0.138622	18	1	5	1	2	1	0	6.9954e-08	41	1	14	0.0762912	21	1	7	1	0	1	0	1.13025e-06	34	1	12	0.12246	14	1	3	1	0	1	0
BP	GO:0007155	cell adhesion	316	1	10	0.512639	54	1	0	1	19	1	1	1	2	1	8	1	38	1	6	1	21	1	1	1	1	1	6	0.904099	33	1	0	1	12	1	0	1	0
BP	GO:0007160	cell-matrix adhesion	4	1	0	1	0	1	0	1	0	1	0	1	0	1	0	1	0	1	0	1	0	1	0	1	0	1	0	1	0	1	0	1	0	1	0	1	0
BP	GO:0007163	establishment or maintenance of cell polarity	5	1	0	1	1	1	0	1	0	1	0	1	0	1	0	1	1	1	0	1	0	1	0	1	0	1	0	1	1	1	0	1	0	1	0	1	0
BP	GO:0007165	signal transduction	1032	0.00125859	136	0.708258	159	0.0422249	64	0.884124	81	1	7	1	2	0.0447699	91	0.00172726	156	1	59	0.800971	104	1	4	1	1	0.136396	72	0.0142452	122	0.474564	40	0.852205	58	0.608608	3	1	0
BP	GO:0007166	cell surface receptor signaling pathway	7	1	1	1	0	1	0	1	0	1	0	1	0	1	1	1	0	1	0	1	0	1	0	1	0	1	1	1	0	1	0	1	0	1	0	1	0
BP	GO:0007169	transmembrane receptor protein tyrosine kinase signaling pathway	335	1	28	5.65459e-11	98	0.775246	20	1	19	1	3	1	0	1	24	4.17367e-10	82	1	21	0.352954	40	1	0	1	0	1	22	3.2769e-10	71	0.766787	15	1	14	1	0	1	0
BP	GO:0007172	signal complex assembly	2	1	0	1	0	1	0	1	0	1	0	1	0	1	0	1	0	1	0	1	0	1	0	1	0	1	0	1	0	1	0	1	0	1	0	1	0
BP	GO:0007186	G protein-coupled receptor signaling pathway	25	1	4	1	2	1	1	1	1	1	0	1	0	1	2	1	2	1	1	1	0	1	0	1	0	1	1	1	2	1	0	1	0	1	0	1	0
BP	GO:0007188	adenylate cyclase-modulating G protein-coupled receptor signaling pathway	19	0.659473	4	1	2	1	1	1	1	1	0	1	0	1	1	1	2	1	1	1	0	1	0	1	0	1	1	1	2	1	0	1	0	1	0	1	0
BP	GO:0007202	activation of phospholipase C activity	4	1	0	1	0	1	0	1	0	1	0	1	0	1	0	1	0	1	0	1	0	1	0	1	0	1	0	1	0	1	0	1	0	1	0	1	0
BP	GO:0007205	protein kinase C-activating G protein-coupled receptor signaling pathway	33	1	3	1	2	1	1	1	1	1	0	1	0	1	0	1	0	1	1	1	2	1	0	1	0	1	0	1	0	1	1	1	1	1	0	1	0
BP	GO:0007231	osmosensory signaling pathway	13	1	2	1	2	0.9935	2	1	0	1	0	1	1	1	2	1	0	1	2	1	1	1	0	1	1	0.99561	2	1	0	0.73676	2	1	0	1	0	1	1
BP	GO:0007263	nitric oxide mediated signal transduction	4	1	1	1	1	1	0	0.273715	2	1	0	1	0	1	1	1	0	1	0	1	1	1	0	1	0	1	1	1	0	1	0	1	1	1	0	1	0
BP	GO:0007267	cell-cell signaling	220	1	5	0.865405	36	1	0	1	8	1	0	1	0	1	4	1	21	1	0	1	9	1	0	1	2	1	3	1	18	1	0	1	3	1	0	1	0
BP	GO:0007275	multicellular organism development	368	0.11299	49	1	44	1	10	1	21	1	0	1	0	1	19	1	41	1	22	1	32	1	1	1	1	1	17	1	30	1	10	1	14	1	0	1	0
BP	GO:0007276	gamete generation	50	1	2	0.741389	10	1	0	1	2	1	0	1	0	1	1	0.575043	9	1	0	1	4	1	1	1	0	1	1	0.249861	9	1	0	1	1	1	0	1	0
BP	GO:0007292	female gamete generation	6	1	0	1	0	1	0	1	0	1	0	1	0	1	0	1	0	1	0	1	0	1	0	1	0	1	0	1	0	1	0	1	0	1	0	1	0
BP	GO:0007338	single fertilization	7	1	1	1	0	1	1	1	1	1	0	1	0	1	1	1	0	1	1	1	1	1	0	1	0	1	1	1	0	1	1	1	1	1	0	1	0
BP	GO:0007346	regulation of mitotic cell cycle	90	1	5	1	3	1	2	1	1	1	0	1	0	1	2	1	2	1	3	1	3	1	0	1	0	1	2	1	2	1	2	1	1	1	0	1	0
BP	GO:0007389	pattern specification process	176	1	5	9.39162e-17	73	1	2	0.0832963	22	1	0	1	0	1	3	5.34842e-11	55	1	5	2.07202e-05	38	1	0	1	0	1	3	2.58475e-11	49	1	1	0.0107266	20	1	0	1	0
BP	GO:0007530	sex determination	3	1	0	1	0	1	0	1	0	1	0	1	1	1	0	1	0	1	0	1	0	1	0	1	0	1	0	1	0	1	0	1	0	1	0	1	0
BP	GO:0007568	aging	149	0.235763	22	0.569343	27	0.631742	11	0.71992	15	1	2	1	1	1	10	0.949169	20	0.74402	12	0.161748	22	1	1	1	2	1	9	1	14	0.815317	8	0.165734	14	1	0	1	0
BP	GO:0007584	response to nutrient	10	0.464902	3	0.717693	3	1	1	1	1	1	0	1	0	0.268236	3	1	2	0.873634	2	1	1	1	0	1	0	0.201644	3	1	2	1	1	1	0	1	0	1	0
BP	GO:0007623	circadian rhythm	450	6.55539e-07	81	1	54	1.29184e-10	56	1	34	1	0	1	6	0.292979	40	1	41	1.52848e-10	61	0.851731	47	1	1	1	2	0.19114	35	1	31	3.65768e-11	46	0.437045	30	1	0	1	0
BP	GO:0007638	mechanosensory behavior	4	1	0	0.51809	2	1	0	1	0	1	0	1	0	1	0	1	0	1	0	1	0	1	0	1	0	1	0	1	0	1	0	1	0	1	0	1	0
BP	GO:0008033	tRNA processing	24	1	2	1	2	1	1	1	0	1	0	1	0	1	1	1	0	1	1	1	0	1	0	1	1	1	1	1	0	1	1	1	0	1	0	1	0
BP	GO:0008150	biological_process	12829	1	1176	1	1679	1	512	1	800	1	59	1	68	1	762	1	1258	1	581	1	1061	1	23	1	32	1	615	1	984	1	324	1	520	1	1	1	1
BP	GO:0008152	metabolic process	477	1	41	0.0035134	97	1	14	0.589851	42	1	4	1	3	1	26	0.0246584	75	1	18	0.716567	51	1	1	1	3	1	19	0.0124952	64	1	7	0.49586	31	1	0	1	0
BP	GO:0008153	para-aminobenzoic acid biosynthetic process	4	1	0	1	0	1	0	1	0	1	0	1	0	1	0	1	1	1	0	1	0	1	0	1	0	1	0	1	0	1	0	1	0	1	0	1	0
BP	GO:0008154	actin polymerization or depolymerization	9	1	0	0.617837	3	1	0	1	0	1	0	1	0	1	1	1	1	1	0	1	0	1	0	1	0	1	0	1	1	1	0	1	0	1	0	1	0
BP	GO:0008202	steroid metabolic process	39	1	0	1	4	1	0	1	2	1	0	1	0	1	0	1	4	1	0	1	1	1	0	1	1	1	0	1	3	1	0	1	0	1	0	1	0
BP	GO:0008219	cell death	206	1	21	1	28	1	11	1	16	1	1	1	3	0.646839	19	1	26	0.873634	15	0.852296	23	1	1	1	0	0.864026	15	1	22	1	6	1	12	1	1	1	0
BP	GO:0008272	sulfate transport	22	1	1	1	0	1	0	1	0	1	1	1	1	1	2	1	0	1	0	1	1	1	0	1	1	1	0	1	0	1	0	1	0	1	0	1	1
BP	GO:0008283	cell proliferation	508	1	16	1.01404e-32	185	1	6	1.07121e-05	69	1	0	1	4	1	13	2.20924e-27	151	1	6	6.31458e-39	154	1	2	1	1	1	12	4.31793e-27	132	1	4	8.30424e-08	60	1	0	1	1
BP	GO:0008284	positive regulation of cell proliferation	217	1	15	1	14	1	3	1	7	1	0	1	1	1	11	1	14	1	1	1	10	1	0	1	0	1	11	1	10	1	0	1	5	1	0	1	0
BP	GO:0008285	negative regulation of cell proliferation	20	1	0	1	4	1	0	1	1	1	0	1	0	1	0	1	2	1	0	1	2	1	0	1	0	1	0	1	2	1	0	1	1	1	0	1	0
BP	GO:0008295	spermidine biosynthetic process	28	1	0	1	1	1	1	1	0	1	0	1	0	1	0	1	0	1	0	1	3	1	0	1	0	1	0	1	0	1	0	1	0	1	0	1	0
BP	GO:0008299	isoprenoid biosynthetic process	32	1	3	1	6	1	0	1	3	1	0	1	0	1	2	1	5	1	0	0.832194	5	1	0	1	0	1	1	1	3	1	0	1	1	1	0	1	0
BP	GO:0008333	endosome to lysosome transport	14	1	0	1	0	1	0	1	0	1	0	1	0	1	0	1	0	1	0	1	1	1	0	1	0	1	0	1	0	1	0	1	0	1	0	1	0
BP	GO:0008356	asymmetric cell division	59	1	0	0.621229	12	1	0	1	2	1	0	1	0	1	0	0.409995	11	1	1	0.836012	8	1	0	1	0	1	0	0.823381	8	1	0	1	1	1	0	1	0
BP	GO:0008360	regulation of cell shape	6	1	0	1	0	1	1	1	0	1	0	1	0	1	0	1	0	1	1	1	0	1	0	1	0	1	0	1	0	1	0	1	0	1	0	1	0
BP	GO:0008361	regulation of cell size	177	1	12	8.4112e-15	70	1	6	0.0524224	23	1	0	1	0	1	9	7.3428e-09	51	1	10	9.5723e-06	39	1	0	1	0	1	9	3.82253e-10	47	1	3	0.0111312	20	1	0	1	0
BP	GO:0008380	RNA splicing	130	0.681272	17	1	1	0.928438	9	1	2	1	0	1	1	1	7	1	1	1	8	1	2	1	0	1	1	1	4	1	0	1	6	1	1	1	0	1	0
BP	GO:0008535	respiratory chain complex IV assembly	7	1	0	1	0	1	0	1	0	1	0	1	1	1	0	1	0	1	1	1	0	1	0	1	0	1	0	1	0	1	0	1	0	1	0	1	0
BP	GO:0008610	lipid biosynthetic process	26	1	4	0.178651	8	0.391931	4	0.722953	4	1	0	1	0	0.704301	4	0.409995	6	0.497434	4	0.534466	5	1	0	1	0	0.467999	4	0.208557	6	0.147239	4	0.852205	3	1	0	1	0
BP	GO:0008612	peptidyl-lysine modification to peptidyl-hypusine	2	1	0	1	0	1	0	1	0	1	0	1	0	1	0	1	0	1	0	1	0	1	0	1	0	1	0	1	0	1	0	1	0	1	0	1	0
BP	GO:0008615	pyridoxine biosynthetic process	11	1	1	1	0	1	1	1	0	1	0	1	0	1	0	1	0	0.926819	2	1	0	1	0	1	0	1	0	1	0	1	1	1	0	1	0	1	0
BP	GO:0008618	7-methylguanosine metabolic process	1	1	0	0.674201	1	1	0	1	0	1	0	1	0	1	0	1	0	1	0	1	0	1	0	1	0	1	0	1	0	1	0	1	0	1	0	1	0
BP	GO:0008643	carbohydrate transport	7	0.818436	2	1	0	1	0	1	0	1	0	1	0	0.609835	2	1	1	1	0	1	0	1	0	1	0	0.486435	2	1	0	1	0	1	0	1	0	1	0
BP	GO:0008652	cellular amino acid biosynthetic process	166	1	15	0.0266094	38	1	10	1	13	1	1	1	1	1	12	0.0409639	31	1	9	0.356186	22	1	0	1	1	1	11	0.0784388	25	0.685431	9	1	8	1	0	1	0
BP	GO:0008654	phospholipid biosynthetic process	61	1	6	1	5	1	4	0.802657	7	1	0	1	0	1	4	1	4	1	4	0.59443	9	1	0	1	0	1	3	1	3	1	3	0.590678	6	1	0	1	0
BP	GO:0009051	pentose-phosphate shunt, oxidative branch	21	1	0	0.747737	5	1	0	0.0458408	6	1	0	1	0	1	1	1	1	1	0	0.105999	6	1	0	1	0	1	0	1	1	1	0	0.0109796	6	1	0	1	0
BP	GO:0009058	biosynthetic process	172	1	15	0.831455	29	1	8	1	15	1	0	1	1	1	9	1	17	1	7	1	17	1	0	1	2	1	8	1	14	1	6	1	11	1	0	1	0
BP	GO:0009060	aerobic respiration	152	1	5	1	20	1	2	1	12	1	0	1	0	1	3	1	12	1	2	1	10	1	0	1	0	1	3	1	12	1	1	1	4	1	0	1	0
BP	GO:0009061	anaerobic respiration	30	1.86117e-13	21	1	0	4.09009e-15	18	1	0	1	1	1	0	2.1151e-16	21	1	0	2.80235e-10	15	1	0	1	0	1	0	9.03887e-14	18	1	0	3.25169e-13	15	1	0	1	0	1	0
BP	GO:0009062	fatty acid catabolic process	160	0.979073	19	1	16	1	9	1	8	1	0	1	1	1	14	1	12	1	10	1	8	1	0	1	0	1	10	1	7	1	6	1	4	1	0	1	0
BP	GO:0009063	cellular amino acid catabolic process	4	0.0512043	3	1	0	1	1	1	0	1	0	1	0	0.268236	2	1	0	1	0	1	0	1	0	1	0	0.212717	2	1	0	1	0	1	0	1	0	1	0
BP	GO:0009067	aspartate family amino acid biosynthetic process	13	1	0	0.0139153	7	1	0	1	2	1	0	1	0	1	0	0.34977	4	1	0	1	1	1	0	1	0	1	0	0.202889	4	1	0	1	1	1	0	1	0
BP	GO:0009069	serine family amino acid metabolic process	28	1	0	0.0480372	10	1	0	1	2	1	0	1	0	1	0	0.0121963	10	1	0	0.618119	5	1	0	1	0	1	0	0.0381222	8	1	0	1	2	1	0	1	0
BP	GO:0009072	aromatic amino acid family metabolic process	135	1	15	0.184263	28	0.711533	10	1	10	1	1	1	0	1	12	0.134826	24	1	9	0.452497	18	1	0	1	1	0.74764	11	0.248841	19	0.28521	9	1	6	1	0	1	0
BP	GO:0009073	aromatic amino acid family biosynthetic process	206	0.0542795	32	1	13	1	11	1	5	1	1	1	1	1	16	1	6	1	8	1	12	1	0	1	1	0.864026	15	1	4	1	7	1	4	1	0	1	0
BP	GO:0009082	branched-chain amino acid biosynthetic process	18	1	3	1	1	1	0	1	0	1	0	1	0	1	2	1	0	1	2	1	1	1	0	1	0	1	2	1	0	1	0	1	0	1	0	1	0
BP	GO:0009083	branched-chain amino acid catabolic process	2	0.11299	2	1	0	1	0	1	0	1	0	1	0	0.898895	1	1	0	1	0	0.836012	1	1	0	1	0	0.772216	1	1	0	1	0	1	0	1	0	1	0
BP	GO:0009086	methionine biosynthetic process	294	1	15	1	46	1	8	1	12	1	0	1	3	1	11	1	29	1	9	1	15	1	0	1	2	1	8	1	26	1	7	1	9	1	0	1	0
BP	GO:0009088	threonine biosynthetic process	15	1	0	1	2	1	0	1	1	1	0	1	0	1	0	1	1	1	0	1	2	1	0	1	0	1	0	1	1	1	0	1	1	1	0	1	0
BP	GO:0009089	lysine biosynthetic process via diaminopimelate	22	1	3	1	2	1	1	1	0	1	0	1	0	1	2	1	1	1	1	1	0	1	0	1	1	1	2	1	0	1	1	1	0	1	0	1	0
BP	GO:0009094	L-phenylalanine biosynthetic process	23	1	0	1	2	1	0	1	2	1	0	1	0	1	0	1	3	1	0	1	2	1	0	1	0	1	0	1	2	1	0	1	1	1	0	1	0
BP	GO:0009097	isoleucine biosynthetic process	10	1	2	1	0	0.743964	2	1	0	1	0	1	0	0.923128	2	1	0	1	1	1	0	1	0	1	0	1	1	1	0	1	1	1	0	1	0	1	0
BP	GO:0009098	leucine biosynthetic process	13	1	2	0.200385	5	1	0	1	0	1	1	1	1	1	1	0.34977	4	1	1	1	0	1	1	1	0	1	1	0.202889	4	1	0	1	0	1	0	1	0
BP	GO:0009102	biotin biosynthetic process	9	1	2	0.617837	3	1	0	0.802657	2	1	0	1	0	0.849485	2	0.436063	3	1	0	0.337837	3	1	0	1	0	0.671845	2	0.305813	3	1	0	0.550891	2	1	0	1	0
BP	GO:0009103	lipopolysaccharide biosynthetic process	4	1	0	1	1	1	0	1	0	1	0	1	0	1	0	1	0	1	0	1	0	1	0	1	0	1	0	1	0	1	0	1	0	1	0	1	0
BP	GO:0009106	lipoate metabolic process	131	1	15	0.156354	28	0.631742	10	1	10	1	1	1	0	0.941361	12	0.111844	24	1	9	0.374291	18	1	0	1	1	0.677014	11	0.202889	19	0.245837	9	1	6	1	0	1	0
BP	GO:0009107	lipoate biosynthetic process	6	1	0	1	0	1	0	1	1	1	0	1	0	1	0	1	0	1	0	1	0	1	0	1	0	1	0	1	0	1	0	1	0	1	0	1	0
BP	GO:0009108	coenzyme biosynthetic process	131	1	15	0.156354	28	0.631742	10	1	10	1	1	1	0	0.941361	12	0.111844	24	1	9	0.374291	18	1	0	1	1	0.677014	11	0.202889	19	0.245837	9	1	6	1	0	1	0
BP	GO:0009113	purine nucleobase biosynthetic process	8	1	0	1	0	1	0	1	0	1	0	1	1	1	0	1	0	1	0	1	0	1	0	1	1	1	0	1	0	1	0	1	0	1	0	1	0
BP	GO:0009116	nucleoside metabolic process	22	1	0	1	0	1	0	1	1	1	0	1	0	1	0	1	0	1	0	1	1	1	0	1	0	1	0	1	0	1	0	1	1	1	0	1	0
BP	GO:0009117	nucleotide metabolic process	153	1	15	0.0376561	35	1	10	0.557334	16	1	1	1	0	1	12	0.0433466	29	1	9	0.0452586	25	1	0	1	1	1	11	0.0600812	24	0.499029	9	0.550891	12	1	0	1	0
BP	GO:0009150	purine ribonucleotide metabolic process	14	1	0	1	1	1	0	1	0	1	0	1	0	1	0	1	1	1	0	1	0	1	0	1	0	1	0	1	1	1	0	1	0	1	0	1	0
BP	GO:0009152	purine ribonucleotide biosynthetic process	15	1	1	1	3	1	0	1	0	1	0	1	0	1	0	1	1	1	0	1	1	1	0	1	1	1	0	1	1	1	0	1	0	1	0	1	0
BP	GO:0009165	nucleotide biosynthetic process	324	1	16	0.0351633	65	1	8	1	13	1	1	7.1352e-13	25	1	13	0.00810592	57	1	7	0.571801	37	1	0	1	7	1	12	0.00721208	48	1	5	1	13	1	0	1	2
BP	GO:0009168	purine ribonucleoside monophosphate biosynthetic process	6	1	0	1	0	1	0	1	0	1	0	1	0	1	0	1	0	1	0	1	0	1	0	1	0	1	0	1	0	1	0	1	0	1	0	1	0
BP	GO:0009173	pyrimidine ribonucleoside monophosphate metabolic process	7	1	0	0.014308	5	1	0	0.622377	2	1	0	1	0	1	0	0.264978	3	1	0	1	0	1	0	1	0	1	0	0.172953	3	1	0	1	0	1	0	1	0
BP	GO:0009186	deoxyribonucleoside diphosphate metabolic process	8	1	1	0.51809	3	1	0	0.71992	2	1	0	1	0	1	0	0.356592	3	1	0	0.0526081	4	1	0	1	0	1	0	0.235509	3	1	0	0.457844	2	1	0	1	0
BP	GO:0009202	deoxyribonucleoside triphosphate biosynthetic process	4	1	0	0.102204	3	1	0	1	0	1	0	1	0	1	0	0.409995	2	1	0	0.337837	2	1	0	1	0	1	0	0.305813	2	1	0	1	0	1	0	1	0
BP	GO:0009220	pyrimidine ribonucleotide biosynthetic process	474	1	4	1	47	1	4	1	1	1	0	1.0809e-36	53	1	4	1	24	1	3	1	10	1	0	5.80696e-13	27	1	3	1	22	1	2	1	1	1	0	1.45388e-08	12
BP	GO:0009225	nucleotide-sugar metabolic process	60	1	6	0.0437473	17	1	2	0.0488357	11	1	1	1	0	1	4	1	8	1	2	0.0931695	12	1	0	1	0	1	4	0.850511	8	1	2	0.116454	8	1	0	1	0
BP	GO:0009226	nucleotide-sugar biosynthetic process	10	1	0	1	2	1	0	1	0	1	0	1	0	1	0	1	0	1	0	1	1	1	0	1	0	1	0	1	0	1	0	1	0	1	0	1	0
BP	GO:0009228	thiamine biosynthetic process	16	1	2	1	0	1	2	1	0	1	0	1	0	1	2	1	0	1	2	1	0	1	1	1	0	1	2	1	0	0.927419	2	1	0	1	0	1	0
BP	GO:0009231	riboflavin biosynthetic process	20	1	3	1	0	1	2	1	0	1	0	1	0	1	2	1	0	1	2	1	0	1	0	1	0	1	2	1	0	1	1	1	0	1	0	1	0
BP	GO:0009240	isopentenyl diphosphate biosynthetic process	2	1	0	1	0	1	0	1	0	1	0	1	0	1	0	1	0	1	0	1	0	1	0	1	0	1	0	1	0	1	0	1	0	1	0	1	0
BP	GO:0009245	lipid A biosynthetic process	4	1	1	1	0	1	1	1	0	1	0	1	0	1	0	1	0	1	0	1	0	1	0	1	0	1	0	1	0	1	0	1	0	1	0	1	0
BP	GO:0009247	glycolipid biosynthetic process	17	1	1	1	0	1	1	1	0	1	1	1	0	1	1	1	1	1	0	1	1	1	0	1	0	1	1	1	0	1	0	1	0	1	0	1	0
BP	GO:0009249	protein lipoylation	2	1	0	1	0	1	0	1	0	1	0	1	0	1	0	1	0	1	0	1	0	1	0	1	0	1	0	1	0	1	0	1	0	1	0	1	0
BP	GO:0009257	10-formyltetrahydrofolate biosynthetic process	5	1	0	1	1	1	0	1	0	1	0	1	0	1	0	1	0	1	0	1	0	1	0	1	0	1	0	1	0	1	0	1	0	1	0	1	0
BP	GO:0009259	ribonucleotide metabolic process	2	1	0	1	0	1	0	1	0	1	0	1	0	1	0	1	0	1	0	1	0	1	0	1	0	1	0	1	0	1	0	1	0	1	0	1	0
BP	GO:0009266	response to temperature stimulus	437	1	37	1	63	0.437658	27	1	34	1	3	1	4	1	32	1	42	0.542926	30	1	36	1	0	1	3	0.80133	29	1	35	1	17	1	22	1	0	1	1
BP	GO:0009267	cellular response to starvation	15	0.00487893	7	1	1	1	1	1	1	1	1	1	0	1	1	0.0544055	6	1	1	1	1	1	0	1	0	1	1	1	1	1	1	1	1	1	0	1	0
BP	GO:0009268	response to pH	6	1	0	1	0	1	0	1	0	1	0	1	0	1	0	1	0	1	0	1	0	1	0	1	0	1	0	1	0	1	0	1	0	1	0	1	0
BP	GO:0009269	response to desiccation	122	1	13	0.51809	23	1	4	0.0747718	17	1	3	1	0	1	8	0.517093	19	1	6	0.567139	16	1	0	1	1	1	8	0.933666	14	1	3	0.576481	10	1	0	1	0
BP	GO:0009270	response to humidity	4	1	0	0.51809	2	1	0	1	0	1	0	1	0	1	0	1	1	1	0	1	1	1	0	1	0	1	0	1	1	1	0	1	0	1	0	1	0
BP	GO:0009294	DNA mediated transformation	100	1	1	1	16	1	2	1	4	1	1	1	1	1	1	0.949169	14	1	1	1	6	1	0	1	1	1	0	0.619064	13	1	0	1	3	1	0	1	0
BP	GO:0009299	mRNA transcription	11	1	0	0.356189	4	1	0	0.99031	2	1	0	1	0	1	0	0.628737	3	1	0	1	2	1	0	1	0	1	0	0.438873	3	1	0	0.665369	2	1	0	1	0
BP	GO:0009301	snRNA transcription	2	1	0	1	0	1	0	1	0	1	0	1	0	1	0	1	0	1	0	1	0	1	0	1	0	1	0	1	0	1	0	1	0	1	0	1	0
BP	GO:0009303	rRNA transcription	8	1	0	1	0	1	0	1	0	1	0	1	0	1	0	1	0	1	0	1	0	1	0	1	0	1	0	1	0	1	0	1	0	1	0	1	0
BP	GO:0009304	tRNA transcription	2	1	0	1	0	1	0	1	0	1	0	1	0	1	0	1	0	1	0	1	0	1	0	1	0	1	0	1	0	1	0	1	0	1	0	1	0
BP	GO:0009306	protein secretion	58	1	4	1	4	1	2	1	1	1	0	1	0	1	3	1	3	1	3	1	3	1	0	1	0	1	2	1	3	1	0	1	1	1	0	1	0
BP	GO:0009311	oligosaccharide metabolic process	18	1	1	1	3	1	0	0.802657	3	1	0	1	0	1	1	1	3	0.671987	3	1	3	1	0	1	0	1	0	1	3	1	0	1	2	1	0	1	0
BP	GO:0009314	response to radiation	6	1	0	1	0	1	0	1	0	1	0	1	0	1	0	1	0	1	0	1	0	1	0	1	0	1	0	1	0	1	0	1	0	1	0	1	0
BP	GO:0009394	2'-deoxyribonucleotide metabolic process	2	1	0	0.157942	2	1	0	1	0	1	0	1	0	1	0	0.11967	2	1	0	0.0982751	2	1	0	1	0	1	0	0.0902099	2	1	0	1	0	1	0	1	0
BP	GO:0009395	phospholipid catabolic process	8	1	1	1	1	1	0	1	0	1	0	1	0	1	0	1	0	1	0	1	0	1	0	1	0	1	0	1	0	1	0	1	0	1	0	1	0
BP	GO:0009396	folic acid-containing compound biosynthetic process	20	1	0	1	1	1	0	1	0	1	0	1	0	1	0	1	0	1	0	1	0	1	0	1	0	1	0	1	0	1	0	1	0	1	0	1	0
BP	GO:0009399	nitrogen fixation	4	1	0	1	0	1	0	1	0	1	0	1	0	1	0	1	0	1	1	1	0	1	0	1	0	1	0	1	0	1	0	1	0	1	0	1	0
BP	GO:0009405	pathogenesis	4	1	0	1	0	1	0	1	0	1	0	1	0	1	0	1	0	1	0	1	0	1	0	1	0	1	0	1	0	1	0	1	0	1	0	1	0
BP	GO:0009407	toxin catabolic process	687	0.781774	74	1	81	1	27	1	42	1	3	1	1	1	44	1	56	1	34	1	44	0.213881	6	1	2	1	35	1	42	1	20	1	23	1	0	1	0
BP	GO:0009408	response to heat	744	0.000108933	109	1	92	1	30	1.55427e-06	95	1	5	1	2	0.00588408	74	1	86	0.358578	49	0.0692761	89	1	0	1	4	0.000160859	69	1	68	1	26	0.00497187	59	1	0	1	1
BP	GO:0009409	response to cold	1510	1.5768e-08	217	1	181	0.631742	76	0.622377	120	0.105486	20	1	15	0.000242079	142	1	144	0.0648875	99	1	125	1	3	1	18	0.000252246	119	1	115	0.408482	56	1	75	1	0	1	5
BP	GO:0009410	response to xenobiotic stimulus	237	0.459401	30	1	21	1	14	1	6	1	4	1	0	0.925823	20	1	15	1	12	1	9	0.159807	4	1	1	1	15	1	13	1	10	1	3	0.599739	2	1	0
BP	GO:0009411	response to UV	110	1	7	1	17	1	1	1	7	1	0	1	0	1	9	0.802425	16	1	6	1	11	1	0	1	1	1	6	0.880125	13	1	0	1	4	1	0	1	0
BP	GO:0009413	response to flooding	9	0.00136064	6	1	1	0.00110279	5	1	0	1	0	1	0	0.000256079	6	1	0	0.00165479	5	1	0	1	0	1	0	8.73022e-05	6	1	0	0.000189651	5	1	0	1	0	1	0
BP	GO:0009414	response to water deprivation	1140	2.88539e-19	211	1	148	0.000532253	79	0.0743321	103	0.0219579	19	1	4	1.54227e-09	134	0.595577	141	3.2147e-06	99	0.168114	125	1	5	1	3	2.68234e-09	114	1	102	4.95926e-05	63	0.129118	73	0.707443	3	1	1
BP	GO:0009415	response to water	12	0.22207	4	1	0	0.889952	2	1	1	1	1	1	0	0.388713	3	1	0	0.317591	3	1	1	1	0	1	0	0.285069	3	1	0	0.653382	2	1	0	1	0	1	0
BP	GO:0009416	response to light stimulus	555	0.0549171	72	0.0380261	103	1	26	0.0305502	58	1	4	1	2	0.285512	48	0.00229152	92	1	27	0.0271538	72	1	1	1	2	0.30503	40	0.00469825	75	1	13	0.0518314	42	1	1	1	0
BP	GO:0009423	chorismate biosynthetic process	8	1	0	1	1	1	0	1	0	1	0	1	1	1	0	1	1	1	0	1	0	1	0	1	0	1	0	1	0	1	0	1	0	1	0	1	0
BP	GO:0009432	SOS response	11	1	0	1	0	1	0	1	0	1	0	1	0	1	1	1	0	1	1	1	0	1	0	1	0	1	0	1	0	1	0	1	0	1	0	1	0
BP	GO:0009435	NAD biosynthetic process	10	1	1	1	0	1	1	1	0	1	0	1	0	1	1	1	0	1	1	1	0	1	0	1	0	1	1	1	0	1	1	1	0	1	0	1	0
BP	GO:0009439	cyanate metabolic process	2	1	0	1	0	1	0	1	0	1	0	1	0	1	0	1	0	1	0	1	0	1	0	1	0	1	0	1	0	1	0	1	0	1	0	1	0
BP	GO:0009440	cyanate catabolic process	2	1	0	1	0	1	0	1	0	1	0	1	0	1	0	1	0	1	0	1	0	1	0	1	0	1	0	1	0	1	0	1	0	1	0	1	0
BP	GO:0009443	pyridoxal 5'-phosphate salvage	4	1	0	1	0	1	0	1	0	1	0	1	0	1	0	1	0	1	0	1	0	1	0	1	0	1	0	1	0	1	0	1	0	1	0	1	0
BP	GO:0009446	putrescine biosynthetic process	13	1	0	1	3	1	0	0.133387	4	1	0	1	0	1	0	1	2	1	0	1	2	1	0	1	0	1	0	1	2	1	0	0.852205	2	1	0	1	0
BP	GO:0009448	gamma-aminobutyric acid metabolic process	6	1	0	1	1	1	0	1	1	1	1	1	0	1	0	0.695989	2	1	0	0.129114	3	1	0	1	0	1	0	1	1	1	0	1	1	1	0	1	0
BP	GO:0009450	gamma-aminobutyric acid catabolic process	9	1	0	1	1	1	0	1	1	0.280844	2	1	0	1	0	1	2	1	0	0.337837	3	1	0	1	0	1	0	1	1	1	0	1	1	1	0	1	0
BP	GO:0009451	RNA modification	56	1	2	1	2	1	0	1	0	1	0	1	1	1	0	1	2	1	0	1	1	1	0	1	0	1	0	1	1	1	0	1	0	1	0	1	0
BP	GO:0009553	embryo sac development	198	1	12	1	16	1	4	1	4	1	1	0.173153	7	1	7	1	19	1	4	1	8	1	0	1	2	1	5	1	11	1	2	1	3	1	0	1	0
BP	GO:0009554	megasporogenesis	15	0.377063	4	1	2	1	0	1	0	1	0	1	0	0.207125	4	1	2	1	2	1	1	1	0	1	0	0.125155	4	1	2	1	0	1	0	1	0	1	0
BP	GO:0009555	pollen development	507	1	39	0.789058	80	1	17	1	35	1	0	1	5	1	31	1	58	1	23	1	51	1	0	1	2	1	23	1	49	1	11	1	29	1	0	1	0
BP	GO:0009556	microsporogenesis	135	1	8	1	18	1	4	1	8	1	2	1	0	1	8	1	14	1	5	1	12	1	2	1	1	1	5	1	11	1	3	1	5	1	0	1	0
BP	GO:0009558	embryo sac cellularization	19	1	0	0.0380261	8	1	0	1	2	1	0	1	0	1	0	1	3	1	0	0.567139	4	1	0	1	0	1	0	1	3	1	0	1	1	1	0	1	0
BP	GO:0009559	embryo sac central cell differentiation	1	1	0	0.674201	1	1	0	1	0	1	0	1	0	1	0	0.622621	1	1	0	1	0	1	0	1	0	1	0	0.553159	1	1	0	1	0	1	0	1	0
BP	GO:0009560	embryo sac egg cell differentiation	414	1	11	1	39	1	6	1	4	1	0	1.43771e-06	20	1	6	1	15	1	7	1	8	1	0	1	5	1	5	1	14	1	2	1	0	1	0	1	0
BP	GO:0009561	megagametogenesis	70	1	3	1	10	1	1	1	1	1	0	5.40324e-06	9	1	2	1	8	1	2	1	1	1	0	1	3	1	2	1	6	1	1	1	0	1	0	1	0
BP	GO:0009567	double fertilization forming a zygote and endosperm	76	1	3	1	11	1	0	1	1	1	1	1	0	1	2	1	9	1	1	1	8	1	0	1	0	1	0	1	7	1	0	1	1	1	0	1	0
BP	GO:0009581	detection of external stimulus	58	0.377063	10	1	4	1	2	1	2	1	1	1	0	0.672686	7	1	2	1	5	1	2	1	0	1	0	0.677014	6	1	1	1	1	1	2	1	0	1	0
BP	GO:0009583	detection of light stimulus	2	1	0	1	0	1	0	1	0	1	0	1	0	1	0	1	0	1	0	1	0	1	0	1	0	1	0	1	0	1	0	1	0	1	0	1	0
BP	GO:0009585	red, far-red light phototransduction	50	0.0346912	12	1	1	1	3	1	1	1	0	1	0	0.813478	6	1	2	1	1	1	4	1	0	1	0	0.86098	5	1	1	1	1	1	1	1	0	1	0
BP	GO:0009590	detection of gravity	27	1	1	1	3	1	0	1	0	1	0	1	0	1	0	1	0	1	1	1	0	1	0	1	0	1	0	1	0	1	0	1	0	1	0	1	0
BP	GO:0009594	detection of nutrient	5	1	0	1	0	1	0	1	0	1	0	1	0	1	0	1	0	1	0	1	0	1	0	1	0	1	0	1	0	1	0	1	0	1	0	1	0
BP	GO:0009595	detection of biotic stimulus	394	0.0036168	60	1	26	1	15	1	13	1	3	1	0	0.00307916	46	1	25	0.232771	30	1	17	1	0	1	1	0.0262811	36	1	17	1	11	1	9	1	0	1	0
BP	GO:0009606	tropism	5	1	0	0.688106	2	1	0	1	0	1	0	1	0	1	0	1	0	1	0	1	0	1	0	1	0	1	0	1	0	1	0	1	0	1	0	1	0
BP	GO:0009610	response to symbiotic fungus	140	0.142876	22	1	12	1	5	1	10	1	1	1	1	0.259933	16	1	7	1	6	1	10	1	1	1	0	1	10	1	5	1	4	1	7	1	0	1	0
BP	GO:0009611	response to wounding	1135	8.14099e-18	206	1	159	5.62506e-05	83	0.802657	90	1	8	1	6	5.28734e-14	148	1	129	1.23946e-08	107	1	104	1	2	1	1	6.43292e-12	122	1	101	0.000149172	61	1	56	1	2	1	0
BP	GO:0009612	response to mechanical stimulus	174	0.00106356	34	1	14	0.0424548	17	1	8	1	1	1	0	0.0022159	26	1	16	0.0137196	20	1	11	1	0	1	0	0.0107249	21	1	12	0.0518511	13	1	7	1	0	1	0
BP	GO:0009615	response to virus	122	1	9	1	20	1	0	0.0747718	17	1	0	1	0	1	5	0.356592	20	1	3	1	14	1	0	1	1	1	3	0.202889	18	1	0	0.179329	12	1	0	1	0
BP	GO:0009616	virus induced gene silencing	295	1	13	1	31	1	6	1	3	1	0	1	1	1	8	1	14	1	3	1	8	1	0	1	1	1	7	1	13	1	3	1	3	1	0	1	0
BP	GO:0009617	response to bacterium	585	0.0151933	79	0.454469	96	1	25	0.193134	55	1	8	1	3	0.0385461	57	1	64	0.0887273	44	0.0769905	72	1	3	1	0	0.122794	45	1	57	1	18	0.0750807	43	1	1	1	0
BP	GO:0009620	response to fungus	379	1.20861e-12	86	1	27	0.0883727	28	1	22	1	1	1	4	2.1988e-12	68	1	32	0.00072934	39	1	24	1	0	1	1	2.68234e-09	54	1	21	0.0915961	21	1	14	1	0	1	1
BP	GO:0009623	response to parasitic fungus	4	1	0	1	1	1	1	1	0	1	0	1	0	1	0	0.409995	2	1	1	1	1	1	0	1	0	1	0	1	1	1	1	1	0	1	0	1	0
BP	GO:0009624	response to nematode	275	0.190446	37	1	40	0.567762	18	1	17	1	1	1	2	0.898895	23	0.965987	35	1	17	0.836012	30	0.00875196	6	1	0	0.900076	19	1	26	1	7	1	12	1	0	1	0
BP	GO:0009625	response to insect	164	1	17	1	25	1	3	1	10	0.00867785	8	1	0	0.849485	15	1	19	1	9	1	13	0.066559	4	1	0	1	10	1	13	1	3	1	5	1	0	1	0
BP	GO:0009626	plant-type hypersensitive response	121	0.00765411	24	1	7	0.133502	12	1	6	1	1	1	0	0.00359415	20	1	4	0.00140621	18	1	7	1	0	1	0	0.0185047	16	1	2	0.0313742	11	1	4	1	0	1	0
BP	GO:0009627	systemic acquired resistance	822	0.734747	88	0.982512	124	0.94784	42	1	46	1	5	1	3	0.268236	68	1	98	0.133385	57	1	49	1	1	1	0	0.969624	50	0.690501	83	0.845458	31	1	30	1	0	1	0
BP	GO:0009629	response to gravity	13	1	0	1	0	1	0	1	0	1	0	1	0	1	0	1	0	1	2	1	1	1	0	1	0	1	0	1	0	1	0	1	0	1	0	1	0
BP	GO:0009630	gravitropism	485	1	21	1	22	1	7	1	11	1	0	1	0	1	12	1	19	1	11	1	14	1	0	1	0	1	10	1	11	1	2	1	9	1	0	1	0
BP	GO:0009631	cold acclimation	100	0.0813629	18	1	14	1	2	1	6	1	2	1	1	1	9	1	7	1	5	1	4	0.900336	2	1	2	1	7	1	6	1	1	1	2	1	0	1	0
BP	GO:0009635	response to herbicide	3	1	0	1	1	1	0	0.170502	2	1	0	1	0	1	0	0.264978	2	1	0	0.0162192	3	1	0	1	0	1	0	1	1	1	0	0.104387	2	1	0	1	0
BP	GO:0009636	response to toxic substance	27	1	4	1	5	0.413858	4	1	1	1	0	1	0	1	2	0.858095	5	1	3	1	1	1	0	1	0	1	2	1	3	0.612356	3	1	0	1	0	1	0
BP	GO:0009637	response to blue light	334	8.51612e-05	59	1	28	1	15	1	21	1	0	1	0	1	24	1	30	1	9	1	29	1	0	1	0	0.784116	23	1	22	1	7	1	15	1	0	1	0
BP	GO:0009638	phototropism	42	0.659473	7	1	7	1	1	0.00371142	11	1	0	1	0	1	3	1	6	1	0	0.0201089	11	1	0	1	0	1	3	0.850511	6	1	0	0.0200824	8	1	0	1	0
BP	GO:0009639	response to red or far red light	128	0.880393	16	1	14	0.884856	9	1	5	1	0	1	0	1	11	1	11	0.637709	11	1	9	1	0	1	0	1	7	1	9	1	6	1	4	1	0	1	0
BP	GO:0009640	photomorphogenesis	689	1	51	1	62	1	22	1	14	1	2	0.000668495	21	1	33	1	45	1	22	1	28	1	4	1	3	1	28	1	38	1	11	1	10	1	0	1	0
BP	GO:0009641	shade avoidance	53	1	6	0.229107	13	1	2	1	4	1	2	1	0	1	5	0.0106693	15	1	4	0.361132	9	1	0	1	1	1	4	0.0121031	13	1	2	1	3	1	0	1	0
BP	GO:0009642	response to light intensity	36	1	4	1	2	1	0	1	2	1	0	1	0	1	4	1	1	1	0	1	1	1	0	1	0	1	2	1	1	1	0	1	1	1	0	1	0
BP	GO:0009643	photosynthetic acclimation	25	0.577504	5	1	1	1	0	1	1	1	0	1	0	0.268236	5	1	4	1	1	1	3	1	0	1	0	0.967327	3	1	1	1	0	1	1	1	0	1	0
BP	GO:0009644	response to high light intensity	677	1.81305e-09	119	1	72	0.553123	38	0.00221435	75	1	4	1	4	0.107035	61	1	63	0.783025	42	1	64	1	0	1	6	0.00582056	58	1	49	0.685431	27	0.39488	43	1	0	1	2
BP	GO:0009645	response to low light intensity stimulus	6	1	1	0.845832	2	1	1	0.499996	2	1	0	1	0	1	1	0.695989	2	1	1	0.582852	2	1	0	1	0	1	1	0.554927	2	1	1	0.303667	2	1	0	1	0
BP	GO:0009646	response to absence of light	105	1.51791e-12	39	1	3	0.0579007	12	1	4	1	2	1	0	1.29995e-05	23	1	6	0.00270397	16	1	7	1	0	1	0	7.13995e-06	21	1	2	0.093575	9	1	4	1	0	1	0
BP	GO:0009647	skotomorphogenesis	11	1	0	1	1	1	0	1	0	1	0	1	0	1	0	1	0	1	0	1	0	1	0	1	0	1	0	1	0	1	0	1	0	1	0	1	0
BP	GO:0009648	photoperiodism	31	1	1	1	1	1	2	1	2	1	0	1	0	1	1	1	0	1	1	1	4	1	0	1	0	1	0	1	0	1	1	1	2	1	0	1	0
BP	GO:0009649	entrainment of circadian clock	18	1	2	1	1	0.556158	3	1	0	1	0	1	0	1	1	1	0	0.671987	3	1	0	1	0	1	0	1	1	1	0	1	2	1	0	1	0	1	0
BP	GO:0009650	UV protection	18	1	3	0.0954351	7	1	0	1	2	1	0	1	0	1	2	0.034326	7	1	0	0.190256	5	1	0	1	0	1	2	0.0117975	7	1	0	1	2	1	0	1	0
BP	GO:0009651	response to salt stress	2501	0.00540251	287	0.0107103	413	0.0169121	138	3.73365e-05	239	1	21	1	19	0.0181068	202	0.180359	311	0.0123667	160	0.000108839	294	0.560573	11	1	21	0.00246838	174	0.0353402	263	0.00230415	105	8.45207e-07	185	1	3	1	4
BP	GO:0009652	thigmotropism	13	1	2	1	1	1	1	1	1	1	0	1	0	1	1	1	1	1	1	1	1	1	0	1	0	1	1	1	1	1	0	1	1	1	0	1	0
BP	GO:0009653	anatomical structure morphogenesis	40	1	1	1.65452e-05	19	1	0	0.228167	7	1	0	1	0	1	1	0.240887	9	1	1	1	5	1	0	1	0	1	0	0.0902099	9	1	0	0.398137	5	1	0	1	0
BP	GO:0009657	plastid organization	299	0.000216346	53	1	17	1	10	1	10	1	2	1	0	1	15	1	13	1	8	1	13	1	0	1	0	1	13	1	8	1	5	1	9	1	0	1	0
BP	GO:0009658	chloroplast organization	473	0.0536438	63	1	33	1	19	1	18	1	3	1	4	1	35	1	14	1	23	1	22	1	0	1	1	0.536193	33	1	10	1	12	1	12	1	0	1	0
BP	GO:0009660	amyloplast organization	21	1	1	1	2	1	0	1	2	1	0	1	0	1	0	1	1	1	1	1	2	1	0	1	1	1	0	1	1	1	0	1	1	1	0	1	0
BP	GO:0009661	chromoplast organization	2	1	0	1	0	1	0	1	0	1	0	1	0	1	0	1	0	1	0	1	0	1	0	1	0	1	0	1	0	1	0	1	0	1	0	1	0
BP	GO:0009662	etioplast organization	5	1	0	1	0	1	0	1	0	1	0	1	0	1	0	1	0	1	0	1	1	1	0	1	0	1	0	1	0	1	0	1	0	1	0	1	0
BP	GO:0009663	plasmodesma organization	7	1	0	1	1	1	0	1	0	1	0	1	0	1	0	1	0	1	0	1	1	1	0	1	0	1	0	1	0	1	0	1	0	1	0	1	0
BP	GO:0009664	plant-type cell wall organization	385	1	13	1.96492e-07	98	1	3	0.236671	38	1	1	0.0112066	13	1	11	0.00275238	68	1	4	0.0125103	55	1	0	1.15431e-08	20	1	9	6.6425e-05	63	1	1	0.642873	25	1	0	9.51278e-05	8
BP	GO:0009682	induced systemic resistance	43	1	5	0.688106	9	1	2	0.994383	5	1	1	1	0	1	3	0.922643	7	0.698919	5	1	4	1	1	1	0	1	2	0.52607	7	1	2	1	3	1	0	1	0
BP	GO:0009684	indoleacetic acid biosynthetic process	328	1	32	2.0443e-15	107	1	18	6.70346e-05	48	0.162021	8	1	0	1	25	4.57695e-15	92	1	15	3.45915e-07	64	1	0	1	0	0.935011	22	2.12213e-14	79	1	12	0.000556362	35	1	0	1	0
BP	GO:0009685	gibberellin metabolic process	4	1	1	1	0	1	0	1	0	1	0	1	0	1	0	1	0	1	0	1	0	1	0	1	0	1	0	1	0	1	0	1	0	1	0	1	0
BP	GO:0009686	gibberellin biosynthetic process	79	0.0181423	17	1	5	1	6	1	2	1	1	1	1	0.197127	11	1	5	1	5	1	1	1	0	1	0	0.527448	8	1	3	1	2	1	0	1	0	1	0
BP	GO:0009687	abscisic acid metabolic process	17	1	0	1	0	1	0	1	1	1	0	1	0	1	1	1	0	1	0	0.919059	3	1	0	1	0	1	0	1	0	1	0	1	1	1	0	1	0
BP	GO:0009688	abscisic acid biosynthetic process	74	0.11299	14	1	7	1	4	1	4	1	1	1	0	0.138764	11	1	9	1	4	1	7	1	0	1	0	0.212717	9	1	6	1	2	1	2	1	0	1	0
BP	GO:0009690	cytokinin metabolic process	73	1	5	1	11	1	1	1	6	1	0	1	0	1	3	1	9	1	3	1	7	1	0	1	0	1	2	1	8	1	1	0.895923	6	1	0	1	0
BP	GO:0009691	cytokinin biosynthetic process	91	1	10	0.150237	21	0.877916	7	1	5	1	0	1	2	0.923128	9	0.489511	15	1	2	1	7	1	0	1	0	1	7	0.627624	12	1	1	1	5	1	0	1	0
BP	GO:0009693	ethylene biosynthetic process	321	0.000199939	56	1	30	0.00961608	28	1	12	1	1	1	0	0.000516193	42	1	27	1.03551e-06	42	1	16	1	0	1	0	0.0124596	32	1	16	0.000506896	25	1	10	1	0	1	0
BP	GO:0009694	jasmonic acid metabolic process	136	0.00377625	27	0.896608	23	1	2	0.000142349	26	1	0	1	1	1	12	0.651969	20	1	3	0.00553004	26	1	0	1	0	0.517881	12	0.825221	16	1	1	0.00124484	19	1	0	1	0
BP	GO:0009695	jasmonic acid biosynthetic process	439	3.23427e-15	101	1	47	0.000292203	40	1	28	1	1	1	4	2.8703e-10	70	1	51	0.000430988	44	1	41	1	0	1	1	3.41232e-09	59	1	34	0.000131888	32	1	16	1	0	1	0
BP	GO:0009696	salicylic acid metabolic process	16	1	0	1	3	1	0	1	2	1	0	1	0	1	0	1	3	1	0	0.375689	4	1	0	1	0	1	0	0.850511	3	1	0	1	2	1	0	1	0
BP	GO:0009697	salicylic acid biosynthetic process	745	0.00482246	100	1	64	1	31	1	29	1	5	1	3	6.11845e-05	83	1	56	0.036588	56	1	35	1	1	1	3	0.0123341	61	1	43	1	24	1	19	1	0	1	1
BP	GO:0009698	phenylpropanoid metabolic process	227	1	20	0.00013975	58	1	6	0.015283	30	1	1	1	1	1	12	0.0237061	41	1	9	0.152267	31	1	0	1	1	1	12	0.00574446	37	1	5	0.109635	20	1	0	1	0
BP	GO:0009699	phenylpropanoid biosynthetic process	45	0.233697	9	0.308822	11	1	4	1	4	1	0	1	0	0.281277	7	0.969798	7	0.782111	5	1	6	1	0	1	0	0.143251	7	0.988614	6	0.588647	4	1	2	1	0	1	0
BP	GO:0009700	indole phytoalexin biosynthetic process	7	1	0	0.982512	2	1	0	0.622377	2	1	0	1	0	1	0	1	1	1	0	1	1	1	0	1	0	1	0	1	1	1	0	1	1	1	0	1	0
BP	GO:0009704	de-etiolation	33	0.604515	6	1	1	1	0	1	1	1	0	1	0	1	2	1	0	1	1	0.497647	6	1	0	1	0	1	2	1	0	1	0	1	1	1	0	1	0
BP	GO:0009715	chalcone biosynthetic process	9	1	0	1	0	1	0	1	0	1	0	1	0	1	0	1	0	0.782111	2	1	1	1	0	1	0	1	0	1	0	1	0	1	0	1	0	1	0
BP	GO:0009718	anthocyanin-containing compound biosynthetic process	136	1	10	1	19	1	5	0.901681	13	1	1	1	0	0.519872	14	1	9	1	10	1	13	1	0	1	1	1	8	1	6	1	4	1	7	1	0	1	0
BP	GO:0009722	detection of cytokinin stimulus	4	1	0	0.51809	2	1	0	1	1	1	0	1	0	1	0	0.409995	2	1	0	1	0	1	0	1	0	1	0	0.305813	2	1	0	1	0	1	0	1	0
BP	GO:0009723	response to ethylene	875	8.9705e-28	196	1	95	4.03401e-10	84	1	47	1	8	1	1	2.60932e-17	132	1	88	9.6593e-10	92	1	65	1	4	1	3	2.67155e-14	108	1	62	1.0133e-10	67	1	36	1	2	1	0
BP	GO:0009725	response to hormone	26	1	1	7.1496e-05	14	1	1	0.310987	5	1	0	1	0	1	1	0.00029703	12	1	1	0.534466	5	1	0	1	1	1	1	2.8526e-05	12	1	1	0.334261	4	1	0	1	0
BP	GO:0009727	detection of ethylene stimulus	10	1	2	0.717693	3	1	1	1	0	1	0	1	0	1	1	1	1	0.873634	2	1	0	1	0	1	0	1	1	1	1	1	1	1	0	1	0	1	0
BP	GO:0009729	detection of brassinosteroid stimulus	13	1	0	1	1	1	0	1	0	1	0	1	0	1	0	1	2	1	0	1	0	1	0	1	0	1	0	1	1	1	0	1	0	1	0	1	0
BP	GO:0009733	response to auxin	1208	1.68324e-06	172	0.663594	186	0.440336	64	0.00264414	120	1	8	1	3	0.000171242	119	0.11967	160	0.416707	74	2.97493e-05	161	1	3	1	2	0.00317627	94	0.704156	119	0.24276	48	3.94582e-05	98	1	2	1	0
BP	GO:0009734	auxin-activated signaling pathway	154	1	12	0.688106	27	1	5	1	11	1	0	1	1	1	6	1	19	1	8	1	10	1	0	1	1	1	4	0.77557	18	1	5	1	8	1	0	1	0
BP	GO:0009735	response to cytokinin	777	1	57	0.807323	120	1	18	0.71992	64	1	4	1.16467e-05	26	1	27	1	85	1	21	0.337837	85	1	0	1	9	1	22	1	73	1	14	0.447949	48	1	0	1	3
BP	GO:0009736	cytokinin-activated signaling pathway	234	1	24	6.4883e-11	76	1	13	3.15639e-05	39	1	5	1	5	1	18	0.0084414	44	1	13	1.13936e-12	62	0.687011	3	1	1	1	15	0.000133602	43	1	9	6.61979e-07	35	1	1	1	1
BP	GO:0009737	response to abscisic acid	1531	1.31809e-13	241	1	202	0.000292203	101	1	113	0.0659202	21	1	9	2.50121e-06	154	1	163	3.2321e-06	124	0.486503	156	1	3	1	5	1.88493e-05	126	1	127	9.46508e-06	81	1	81	1	3	1	1
BP	GO:0009738	abscisic acid-activated signaling pathway	738	8.72916e-15	143	1	70	9.44607e-06	63	1	37	0.517539	11	1	2	4.38678e-11	102	1	67	3.05336e-06	72	1	43	1	4	1	0	4.79518e-09	83	1	46	1.46247e-07	53	1	24	0.405076	3	1	0
BP	GO:0009739	response to gibberellin	309	0.00299005	50	1	47	0.718873	19	1	18	1	5	1	6	0.243308	30	1	37	0.646811	22	0.902314	33	1	1	1	4	0.124583	27	1	29	0.499029	15	1	11	1	0	1	2
BP	GO:0009740	gibberellic acid mediated signaling pathway	187	0.120276	28	0.33767	35	0.650811	13	1	14	1	2	1	2	0.058284	23	0.107102	32	1	13	0.287633	25	1	0	1	1	0.152649	18	0.0600812	28	1	8	1	10	1	0	1	0
BP	GO:0009741	response to brassinosteroid	255	0.0823897	37	0.00599711	57	1	15	0.00736227	34	1	4	1	1	0.058284	29	0.00857406	47	1	14	0.0110213	40	1	0	1	1	0.0490613	25	0.0121031	39	1	11	0.0321829	24	1	0	1	0
BP	GO:0009742	brassinosteroid mediated signaling pathway	156	1	12	1	25	1	8	1	11	1	0	1	0	1	12	1	18	1	6	1	16	1	0	1	2	1	10	1	14	1	6	1	8	1	0	1	0
BP	GO:0009743	response to carbohydrate	80	0.0204081	17	1	5	1	3	1	1	1	3	1	0	0.101581	12	1	0	1	3	1	1	0.687011	2	1	0	0.147038	10	1	0	1	0	1	0	0.138433	2	1	0
BP	GO:0009744	response to sucrose	724	1.31341e-17	149	1	106	1.00561e-05	62	1	54	1	8	1	4	0.000352871	78	0.747223	90	0.0046198	59	0.830673	74	1	0	1	5	0.000125882	68	1	68	0.00347291	40	1	35	1	0	1	1
BP	GO:0009745	sucrose mediated signaling	2	1	0	1	0	1	0	1	0	1	0	1	0	1	0	1	0	0.926819	1	1	0	1	0	1	0	1	0	1	0	1	0	1	0	1	0	1	0
BP	GO:0009747	hexokinase-dependent signaling	4	1	0	1	0	1	0	1	0	1	0	1	0	1	0	1	0	1	0	1	0	1	0	1	0	1	0	1	0	1	0	1	0	1	0	1	0
BP	GO:0009749	response to glucose	313	0.483546	38	0.215105	57	0.238412	22	1	22	1	3	1	4	1	24	0.645434	42	0.343824	24	0.978377	33	1	0	1	3	0.748333	22	0.438873	36	0.313231	16	1	18	1	0	1	1
BP	GO:0009750	response to fructose	517	5.45048e-05	83	0.00671449	102	0.00434674	41	0.227177	49	0.512351	9	1	3	0.928506	40	0.0202102	81	0.35784	36	0.00123497	75	1	3	1	3	0.379669	37	0.0600812	64	0.588933	22	0.0071012	44	1	0	1	1
BP	GO:0009751	response to salicylic acid	501	2.1009e-06	86	1	55	0.333985	31	1	28	1	6	1	6	0.000329131	59	1	53	0.0362032	41	1	43	1	1	1	1	0.0018972	48	1	32	0.482019	22	1	17	1	0	1	0
BP	GO:0009753	response to jasmonic acid	952	3.56534e-20	188	1	115	0.0417704	60	0.257229	83	1	10	1	5	9.38805e-10	118	0.714695	117	0.000781507	77	0.115703	108	1	3	1	0	2.4688e-08	97	1	81	0.00591372	48	0.184023	61	1	2	1	0
BP	GO:0009755	hormone-mediated signaling pathway	145	0.00101139	30	1	3	1	8	1	1	1	1	1	0	0.967517	13	1	7	1	4	1	3	1	1	1	0	0.428596	13	1	3	1	3	1	0	1	1	1	0
BP	GO:0009759	indole glucosinolate biosynthetic process	32	1	4	0.440325	8	1	3	0.0261757	8	1	0	1	0	0.489154	5	0.00970666	11	0.317591	5	0.0308211	9	1	0	1	0	1	3	0.0757927	8	0.815317	3	0.00366081	8	1	0	1	0
BP	GO:0009765	photosynthesis, light harvesting	18	1	1	1	0	1	0	1	0	1	0	1	0	1	0	1	0	1	0	1	0	1	0	1	0	1	0	1	0	1	0	1	0	1	0	1	0
BP	GO:0009767	photosynthetic electron transport chain	42	0.0724521	10	1	1	0.957256	4	1	1	1	0	1	0	0.923128	5	1	3	1	4	1	2	1	0	1	0	0.607341	5	1	0	1	3	1	0	1	0	1	0
BP	GO:0009768	photosynthesis, light harvesting in photosystem I	19	1	2	1	1	1	0	1	0	1	0	1	0	1	0	1	0	1	0	1	0	1	0	1	0	1	0	1	0	1	0	1	0	1	0	1	0
BP	GO:0009769	photosynthesis, light harvesting in photosystem II	14	1	0	1	2	1	0	1	0	1	0	1	0	1	0	1	0	1	0	1	0	1	0	1	0	1	0	1	0	1	0	1	0	1	0	1	0
BP	GO:0009772	photosynthetic electron transport in photosystem II	30	1	1	1	2	1	0	1	1	1	0	1	0	1	1	1	4	1	0	1	1	1	0	1	0	1	1	1	2	1	0	1	1	1	0	1	0
BP	GO:0009773	photosynthetic electron transport in photosystem I	195	9.03659e-05	40	1	4	0.743964	13	1	4	1	1	1	0	0.225364	21	1	11	1	10	1	10	1	0	1	1	0.0677391	20	1	4	1	7	1	3	1	0	1	0
BP	GO:0009780	photosynthetic NADP+ reduction	6	1	0	1	0	1	0	1	0	1	0	1	0	1	0	1	1	1	0	1	1	1	0	1	1	1	0	1	0	1	0	1	0	1	0	1	0
BP	GO:0009785	blue light signaling pathway	46	1	3	1	5	1	2	1	3	1	0	1	0	1	2	1	5	1	1	0.391792	8	1	0	1	0	1	2	1	4	1	1	1	3	1	0	1	0
BP	GO:0009786	regulation of asymmetric cell division	8	1	0	1	1	1	0	1	1	1	0	1	0	1	1	0.949169	2	1	0	1	1	1	0	1	0	1	0	1	1	1	0	1	0	1	0	1	0
BP	GO:0009787	regulation of abscisic acid-activated signaling pathway	21	0.809835	4	0.170399	7	1	1	1	2	1	0	1	0	0.99825	3	0.0231371	8	1	2	0.0331952	7	1	0	1	0	1	2	0.0280799	7	1	1	1	2	1	0	1	0
BP	GO:0009788	negative regulation of abscisic acid-activated signaling pathway	101	0.909904	13	0.99474	17	0.738706	8	1	6	1	1	1	0	1	8	0.242846	18	1	8	1	10	1	0	1	0	1	8	0.646602	13	0.423234	7	1	3	1	0	1	0
BP	GO:0009789	positive regulation of abscisic acid-activated signaling pathway	57	0.601557	9	1	4	0.889952	5	1	2	1	0	1	0	1	4	1	2	1	5	1	5	1	0	1	0	1	4	1	2	0.958836	4	1	2	1	0	1	0
BP	GO:0009791	post-embryonic development	103	1	4	1	5	1	3	1	4	1	0	1	0	1	4	1	5	1	5	1	2	1	0	1	2	1	3	1	1	1	2	1	2	1	0	1	0
BP	GO:0009793	embryo development ending in seed dormancy	1457	1	84	1	125	1	39	1	50	1	5	1	19	1	46	1	90	1	45	1	82	1	5	1	14	1	35	1	64	1	20	1	38	1	0	1	4
BP	GO:0009799	specification of symmetry	2	1	0	1	0	1	0	1	0	1	0	1	0	1	0	1	0	1	0	1	0	1	0	1	0	1	0	1	0	1	0	1	0	1	0	1	0
BP	GO:0009800	cinnamic acid biosynthetic process	5	0.101145	3	1	1	1	1	1	0	1	0	1	0	1	0	1	1	1	0	1	0	1	0	1	0	1	0	1	1	1	0	1	0	1	0	1	0
BP	GO:0009801	cinnamic acid ester metabolic process	4	1	1	1	0	1	0	1	0	1	0	1	0	0.268236	2	1	0	1	0	1	0	1	0	1	0	1	1	1	0	1	0	1	0	1	0	1	0
BP	GO:0009805	coumarin biosynthetic process	224	1	18	9.74676e-06	61	1	10	0.172934	25	1	0	1	0	1	17	0.0719928	38	1	11	0.531673	27	1	0	1	0	1	15	0.0251324	34	1	9	1	14	1	0	1	0
BP	GO:0009807	lignan biosynthetic process	32	1	0	0.00117363	14	1	2	0.000309122	11	1	0	1	0	1	2	0.00970666	11	1	0	0.0883704	8	1	0	1	0	1	0	0.0249595	9	1	0	0.0668932	6	1	0	1	0
BP	GO:0009808	lignin metabolic process	58	0.377063	10	0.00195696	20	1	2	2.31112e-05	17	1	0	1	0	1	6	0.0237061	15	1	3	0.00424628	15	1	0	1	0	0.677014	6	0.00329064	15	1	2	0.0123364	10	1	0	1	0
BP	GO:0009809	lignin biosynthetic process	144	1	15	0.00413373	37	1	6	0.398176	16	1	0	1	0	1	6	1	17	1	6	1	16	1	0	1	0	1	6	1	12	1	6	0.428759	12	1	0	1	0
BP	GO:0009812	flavonoid metabolic process	6	1	1	1	1	1	0	1	1	1	0	1	0	1	1	1	0	1	0	1	1	1	0	1	0	1	1	1	0	1	0	1	0	1	0	1	0
BP	GO:0009813	flavonoid biosynthetic process	176	0.00127268	34	1	17	0.743964	12	0.247602	20	1	3	1	0	0.000419506	28	1	18	0.646811	14	0.523514	22	1	0	1	1	0.0281388	20	1	13	1	8	0.910268	12	1	0	1	0
BP	GO:0009814	defense response, incompatible interaction	348	1	36	1	25	1	12	1	11	1	1	1	3	0.446559	31	1	23	0.701792	24	1	16	1	0	1	2	1	19	1	15	1	9	1	7	1	0	1	1
BP	GO:0009816	defense response to bacterium, incompatible interaction	147	0.324102	21	1	7	1	8	1	4	1	2	1	0	0.492421	15	1	3	0.0327388	17	1	8	1	0	1	0	0.68363	12	1	1	1	6	1	3	1	0	1	0
BP	GO:0009817	defense response to fungus, incompatible interaction	122	1	11	1	10	1	7	1	9	1	1	1	0	1	10	1	3	0.0723551	14	1	10	1	0	1	0	1	9	1	3	0.786288	7	1	7	1	0	1	0
BP	GO:0009819	drought recovery	16	1	0	1	2	1	0	1	2	1	0	1	0	1	0	1	0	1	0	1	2	1	0	1	0	1	0	1	0	1	0	1	2	1	0	1	0
BP	GO:0009821	alkaloid biosynthetic process	35	1	4	0.33553	9	1	2	0.127209	7	1	0	1	0	1	2	0.540271	7	1	1	0.000213416	13	1	0	1	0	1	2	0.537763	6	1	1	0.0274154	7	1	0	1	0
BP	GO:0009823	cytokinin catabolic process	13	1	1	0.0690549	6	1	0	1	2	1	0	1	0	1	1	0.00495753	7	1	0	0.228616	4	1	0	1	0	1	1	0.0535778	5	1	0	1	1	1	0	1	0
BP	GO:0009825	multidimensional cell growth	349	1	8	8.50214e-18	117	1	4	0.0199355	41	1	0	1	1	1	7	1.656e-08	80	1	8	0.00702771	52	1	0	1	1	1	5	5.71413e-09	70	1	2	0.00314829	34	1	0	1	0
BP	GO:0009826	unidimensional cell growth	347	1	16	1.44302e-17	116	1	15	6.6157e-05	50	1	1	1	2	1	21	6.66049e-08	78	1	17	0.00366204	53	1	0	1	0	1	14	2.55857e-10	73	1	11	0.000155421	38	1	0	1	0
BP	GO:0009827	plant-type cell wall modification	175	1	7	0.0914217	37	1	4	1.46249e-05	33	1	0	1	1	1	4	0.169939	29	1	5	0.00613209	31	1	2	1	1	1	3	0.421802	22	1	2	0.0208314	19	1	0	1	0
BP	GO:0009828	plant-type cell wall loosening	89	1	8	6.41026e-15	46	1	6	1.35051e-05	22	1	1	1	3	1	8	2.38121e-09	34	1	6	5.03428e-08	29	1	0	1	0	1	7	2.90208e-11	33	0.614638	6	2.17926e-05	18	1	0	1	0
BP	GO:0009830	cell wall modification involved in abscission	25	1	2	1	4	1	2	1	0	1	2	0.914294	2	1	0	0.152898	7	1	3	1	0	1	0	1	0	1	0	0.880125	4	1	1	1	0	1	0	1	0
BP	GO:0009831	plant-type cell wall modification involved in multidimensional cell growth	68	1	2	8.87902e-14	38	1	1	4.64835e-05	18	1	1	1	0	1	2	3.0318e-07	26	1	1	1.05955e-06	23	1	0	1	0	1	1	8.41846e-08	24	1	1	0.000873071	13	1	0	1	0
BP	GO:0009832	plant-type cell wall biogenesis	339	1	9	1.19175e-12	103	1	7	0.031316	39	1	1	1	2	1	10	0.11967	52	1	7	0.0178212	49	1	0	1	0	1	7	0.010401	49	1	2	0.116454	27	1	0	1	0
BP	GO:0009833	plant-type primary cell wall biogenesis	17	1	0	0.475189	5	1	0	1	0	1	0	1	0	1	0	1	1	1	0	1	0	1	0	1	0	1	0	1	1	1	0	1	0	1	0	1	0
BP	GO:0009834	plant-type secondary cell wall biogenesis	111	1	4	8.44999e-09	43	1	1	0.000133508	23	1	0	1	0	1	4	0.000891979	28	1	2	0.0190293	21	1	0	1	1	1	1	0.000128618	26	1	1	0.00301097	16	1	0	1	0
BP	GO:0009835	fruit ripening	15	0.0299049	6	0.126528	6	1	0	0.628615	3	1	0	1	0	0.207125	4	0.0544055	6	1	1	0.817781	3	1	0	1	0	0.125155	4	0.0902099	5	1	0	0.321742	3	1	0	1	0
BP	GO:0009838	abscission	14	1	0	0.621229	4	1	0	1	0	1	0	1	0	1	0	0.922643	3	1	0	1	1	1	0	1	0	1	0	0.690501	3	1	0	1	0	1	0	1	0
BP	GO:0009845	seed germination	511	1	44	1	44	1	25	1	10	1	5	1	7	1	30	1	26	1	25	1	21	0.914648	4	1	6	1	23	1	23	1	20	1	7	1	0	1	2
BP	GO:0009846	pollen germination	144	1	8	0.956022	24	1	2	0.261821	17	1	0	1	1	1	7	1	18	1	1	1	14	1	0	1	0	1	4	0.772744	17	1	1	0.428759	12	1	0	1	0
BP	GO:0009850	auxin metabolic process	36	1	4	1	4	1	0	0.349104	6	1	0	1	0	1	2	0.310604	8	1	1	0.613267	6	1	0	1	0	1	2	1	4	1	0	0.295087	5	1	0	1	0
BP	GO:0009851	auxin biosynthetic process	46	1	6	0.337889	11	0.594053	5	0.71992	6	1	0	1	0	1	3	0.229952	10	0.816252	5	0.690878	7	1	0	1	0	1	3	0.345568	8	0.214024	5	0.567734	5	1	0	1	0
BP	GO:0009853	photorespiration	661	1	32	1	47	1	13	1	14	1	2	1	8	1	20	1	35	1	15	1	27	1	0	1	5	1	15	1	28	1	8	1	9	1	0	1	0
BP	GO:0009854	oxidative photosynthetic carbon pathway	8	1	0	1	0	1	0	1	0	1	0	1	0	1	0	1	0	1	0	1	1	1	0	1	0	1	0	1	0	1	0	1	0	1	0	1	0
BP	GO:0009855	determination of bilateral symmetry	383	1	37	4.29255e-06	93	0.0965741	28	0.802657	33	1	2	1	0	1	30	0.00578911	66	0.358852	28	0.279511	46	1	2	1	0	0.626562	27	0.000393774	60	0.160599	20	0.63043	25	1	0	1	0
BP	GO:0009856	pollination	2	1	0	1	0	1	0	1	0	1	0	1	0	1	0	1	0	1	0	1	0	1	0	1	0	1	0	1	0	1	0	1	0	1	0	1	0
BP	GO:0009860	pollen tube growth	371	1	20	0.0237073	74	1	5	0.000181422	51	1	2	1	3	1	13	0.160948	55	1	8	0.00193128	57	1	0	1	1	1	11	0.0962898	47	1	2	0.00115861	37	1	0	1	0
BP	GO:0009861	jasmonic acid and ethylene-dependent systemic resistance	22	1	2	1	1	1	1	1	0	1	0	1	0	1	3	0.550424	5	1	1	1	1	1	0	1	0	1	2	1	1	1	0	1	0	1	0	1	0
BP	GO:0009862	systemic acquired resistance, salicylic acid mediated signaling pathway	901	2.25791e-17	173	1	72	2.30343e-07	78	1	32	1	7	1	0	1.64631e-22	147	1	55	3.35025e-14	106	1	45	1	4	1	1	4.2086e-17	117	1	43	5.86902e-09	64	1	21	1	0	1	0
BP	GO:0009863	salicylic acid mediated signaling pathway	556	3.63292e-08	99	1	47	0.00822155	42	1	19	1	3	1	2	1.61113e-09	80	1	42	6.16762e-06	58	1	24	1	1	1	2	6.00503e-07	63	1	27	0.00188032	34	1	9	1	1	1	1
BP	GO:0009864	induced systemic resistance, jasmonic acid mediated signaling pathway	35	0.0204081	10	1	3	0.284188	5	1	2	1	1	1	0	0.0398162	8	1	1	0.403238	5	1	2	1	0	1	0	0.049949	7	1	1	0.0922872	5	1	2	1	0	1	0
BP	GO:0009865	pollen tube adhesion	8	1	0	0.51809	3	1	0	0.71992	2	1	1	1	0	1	0	0.0888748	4	1	0	0.0526081	4	1	0	1	0	1	0	0.235509	3	1	0	0.457844	2	1	0	1	0
BP	GO:0009866	induced systemic resistance, ethylene mediated signaling pathway	5	1	0	1	0	1	0	1	0	1	0	1	0	1	0	1	0	1	0	1	0	1	0	1	0	1	0	1	0	1	0	1	0	1	0	1	0
BP	GO:0009867	jasmonic acid mediated signaling pathway	997	1.31809e-13	174	1	83	0.209999	57	1	44	1	6	1	2	1.23374e-14	137	1	81	8.29636e-05	84	1	60	1	1	1	2	4.04705e-10	106	1	57	0.239498	41	1	28	1	0	1	0
BP	GO:0009868	jasmonic acid and ethylene-dependent systemic resistance, jasmonic acid mediated signaling pathway	4	1	1	1	0	1	1	1	0	1	0	1	0	0.268236	2	1	0	1	0	1	0	1	0	1	0	1	1	1	0	1	0	1	0	1	0	1	0
BP	GO:0009870	defense response signaling pathway, resistance gene-dependent	60	0.11735	12	1	3	1	4	1	1	1	0	1	0	0.749168	7	1	2	1	5	1	0	1	0	1	0	0.7427	6	1	2	1	3	1	0	1	0	1	0
BP	GO:0009871	jasmonic acid and ethylene-dependent systemic resistance, ethylene mediated signaling pathway	16	1	0	1	1	1	0	0.71913	3	1	0	1	0	1	0	1	1	1	0	0.836012	3	1	0	1	0	1	0	1	1	1	0	1	1	1	0	1	0
BP	GO:0009873	ethylene-activated signaling pathway	330	5.67632e-12	77	1	23	1.26723e-07	41	1	11	0.512351	7	1	2	9.34082e-09	55	1	23	2.09742e-06	42	1	11	1	3	1	0	1.35269e-08	48	1	14	1.27885e-05	29	1	6	0.0762121	3	1	0
BP	GO:0009875	pollen-pistil interaction	3	1	0	1	1	1	0	1	0	1	0	1	0	1	0	1	1	1	0	1	0	1	0	1	0	1	0	1	1	1	0	1	0	1	0	1	0
BP	GO:0009877	nodulation	7	1	1	0.982512	2	0.00561178	4	1	0	1	0	1	0	1	1	0.264978	3	0.00723956	4	1	0	1	0	1	0	1	1	0.690501	2	0.0344444	3	1	0	1	0	1	0
BP	GO:0009880	embryonic pattern specification	136	1	6	1	13	1	2	1	2	1	0	1	2	1	2	1	9	1	2	1	5	1	0	1	1	1	2	1	8	1	1	1	1	1	0	1	0
BP	GO:0009886	post-embryonic animal morphogenesis	49	1	4	1	8	1	0	1	1	1	0	1	0	1	3	1	7	1	0	1	4	1	0	1	0	1	2	1	5	1	0	1	1	1	0	1	0
BP	GO:0009887	animal organ morphogenesis	332	1	25	0.355871	58	1	13	1	18	1	0	1	0	1	18	0.574338	45	1	15	1	32	1	0	1	0	1	15	0.248841	40	1	7	1	13	1	0	1	0
BP	GO:0009888	tissue development	166	1	7	1	20	1	3	1	7	1	0	1	0	1	4	1	15	1	4	1	11	1	0	1	0	1	4	1	13	1	2	1	5	1	0	1	0
BP	GO:0009892	negative regulation of metabolic process	5	0.101145	3	1	1	1	1	1	0	1	0	1	0	1	0	1	1	1	0	1	0	1	0	1	0	1	0	1	1	1	0	1	0	1	0	1	0
BP	GO:0009901	anther dehiscence	29	0.39585	6	1	1	1	0	1	2	1	0	1	0	1	2	1	1	1	2	1	2	1	0	1	0	1	1	1	0	1	0	1	1	1	0	1	0
BP	GO:0009902	chloroplast relocation	311	0.00340688	50	1	13	1	11	1	11	1	2	1	1	0.334586	29	1	11	1	12	1	19	1	0	1	0	0.279578	25	1	5	1	5	1	8	1	0	1	0
BP	GO:0009903	chloroplast avoidance movement	21	1	0	1	4	1	0	0.993351	3	1	0	1	0	1	0	1	2	1	0	1	1	1	0	1	0	1	0	1	2	1	0	1	1	1	0	1	0
BP	GO:0009904	chloroplast accumulation movement	14	1	0	0.621229	4	1	0	0.557334	3	1	0	1	0	1	0	1	2	1	0	1	1	1	0	1	0	1	0	1	2	1	0	1	1	1	0	1	0
BP	GO:0009908	flower development	295	1	22	1	33	1	8	1	16	1	1	1	6	1	17	1	26	1	9	1	21	1	1	1	0	1	12	1	21	1	5	1	10	1	0	1	0
BP	GO:0009909	regulation of flower development	854	1	45	0.00178077	162	1	21	1	39	1	2	1	14	1	23	0.00578911	129	1	17	0.000472521	115	1	4	1	6	1	20	0.000431182	113	1	11	1	35	1	0	1	0
BP	GO:0009910	negative regulation of flower development	163	1	16	1	14	1	6	1	3	1	0	1	1	1	13	1	9	1	10	1	7	1	0	1	0	1	10	1	8	1	5	1	2	1	0	1	0
BP	GO:0009911	positive regulation of flower development	102	1	7	1	11	1	4	1	8	1	0	1	0	1	4	1	10	1	3	1	7	1	0	1	0	1	3	1	7	1	2	1	6	1	0	1	0
BP	GO:0009913	epidermal cell differentiation	57	1	1	0.118356	15	1	0	1	5	1	0	1	0	1	2	0.0211958	15	1	1	0.481418	9	1	0	1	0	1	1	0.0535778	12	1	0	1	4	1	0	1	0
BP	GO:0009915	phloem sucrose loading	8	1	1	0.156681	4	1	0	0.71992	2	1	0	1	0	1	1	0.0139933	5	1	0	0.0526081	4	1	0	1	0	1	1	0.0462797	4	1	0	0.457844	2	1	0	1	0
BP	GO:0009920	cell plate formation involved in plant-type cell wall biogenesis	30	1	1	1	0	1	1	1	0	1	0	1	1	1	1	1	0	1	1	1	2	1	0	1	0	1	1	1	0	1	1	1	0	1	0	1	0
BP	GO:0009926	auxin polar transport	245	1	15	1.6361e-13	84	1	8	0.0229887	31	1	0	1	0	1	10	1.4597e-09	65	1	10	3.09031e-06	50	1	1	1	0	1	9	9.12797e-11	59	1	4	0.00503429	26	1	0	1	0
BP	GO:0009932	cell tip growth	332	1	7	1.08886e-20	119	1	4	0.000185188	47	1	0	1	1	1	7	3.82819e-09	79	1	8	0.000186716	56	1	0	1	1	1	6	5.60612e-10	70	1	2	0.00014226	37	1	0	1	0
BP	GO:0009933	meristem structural organization	294	1	16	1	23	1	7	1	5	1	2	1	3	1	10	1	17	1	7	1	12	0.215009	4	1	2	1	8	1	13	1	4	1	5	1	0	1	0
BP	GO:0009934	regulation of meristem structural organization	40	1	4	0.0878483	12	1	1	1	2	1	0	1	0	1	1	0.0490263	11	1	0	0.100861	9	1	0	1	0	1	1	0.0352819	10	1	0	1	1	1	0	1	0
BP	GO:0009937	regulation of gibberellic acid mediated signaling pathway	9	1	1	1	1	1	0	1	0	1	0	1	0	1	1	1	1	1	0	1	0	1	0	1	0	1	1	1	0	1	0	1	0	1	0	1	0
BP	GO:0009938	negative regulation of gibberellic acid mediated signaling pathway	24	1	0	1	1	1	0	1	0	1	0	1	0	1	0	1	1	1	0	1	1	1	0	1	1	1	0	1	0	1	0	1	0	1	0	1	0
BP	GO:0009939	positive regulation of gibberellic acid mediated signaling pathway	17	0.190293	5	1	0	0.133683	4	1	0	1	0	1	0	0.268236	4	1	0	0.181308	4	1	0	1	0	1	0	0.545438	3	1	0	0.0451312	4	1	0	1	0	1	0
BP	GO:0009942	longitudinal axis specification	22	0.39585	5	1	2	1	0	1	1	1	0	1	0	1	1	1	3	1	0	1	3	1	0	1	0	1	1	1	2	1	0	1	1	1	0	1	0
BP	GO:0009943	adaxial/abaxial axis specification	25	1	4	1	4	0.877916	3	1	1	1	0	1	0	0.0914839	6	1	4	0.447369	4	1	2	1	0	1	0	0.423528	4	1	3	1	2	1	0	1	0	1	0
BP	GO:0009944	polarity specification of adaxial/abaxial axis	242	0.298573	32	3.13574e-05	63	0.000292203	27	0.3174	25	1	2	1	2	0.088348	27	0.0004716	50	0.00308924	27	0.0394558	36	1	2	1	0	0.0502193	24	2.81601e-05	46	0.000519323	21	0.275584	19	1	0	1	0
BP	GO:0009945	radial axis specification	7	0.228611	3	1	0	1	0	1	0	1	0	1	0	1	1	1	0	1	0	1	0	1	0	1	0	1	1	1	0	1	0	1	0	1	0	1	0
BP	GO:0009946	proximal/distal axis specification	6	1	0	1	0	1	0	1	0	1	0	1	0	1	0	1	0	1	1	1	0	1	0	1	0	1	0	1	0	1	0	1	0	1	0	1	0
BP	GO:0009954	proximal/distal pattern formation	41	0.00623966	12	1	2	1	2	1	4	1	0	1	0	0.225364	7	1	5	1	2	1	4	1	0	1	0	0.104643	7	1	1	1	0	0.876862	4	1	0	1	0
BP	GO:0009955	adaxial/abaxial pattern specification	25	1	4	1	5	1	1	1	0	1	0	0.914294	2	0.268236	5	0.699786	5	1	1	1	2	1	0	0.1362	3	0.423528	4	0.438873	5	1	1	1	0	1	0	0.122237	2
BP	GO:0009956	radial pattern formation	25	1	0	0.655341	6	1	0	1	1	1	0	1	0	1	1	0.699786	5	1	1	1	2	1	0	1	0	1	0	0.438873	5	1	0	1	1	1	0	1	0
BP	GO:0009957	epidermal cell fate specification	42	1	0	0.118845	12	1	0	0.559515	6	1	0	1	1	1	0	0.0269592	12	1	0	0.00643506	12	1	0	1	2	1	0	0.111272	9	1	0	0.178871	6	1	0	1	1
BP	GO:0009958	positive gravitropism	85	0.268119	14	0.0431953	22	1	1	0.0186673	15	1	0	1	0	1	8	0.0349131	19	1	1	0.00180279	20	1	0	1	0	0.671845	8	0.0449854	16	1	0	0.0200686	12	1	0	1	0
BP	GO:0009959	negative gravitropism	31	1	2	1	4	1	1	1	2	1	0	1	0	1	0	1	1	1	1	1	2	1	0	1	1	1	0	1	1	1	0	1	1	1	0	1	0
BP	GO:0009960	endosperm development	45	1	3	1	5	1	1	1	0	1	0	1	0	1	0	1	3	1	0	1	4	1	0	1	0	1	0	1	2	1	0	1	0	1	0	1	0
BP	GO:0009961	response to 1-aminocyclopropane-1-carboxylic acid	18	1	2	1	0	1	0	1	0	1	0	1	0	1	2	1	0	1	0	1	0	1	0	1	0	1	2	1	0	1	0	1	0	1	0	1	0
BP	GO:0009962	regulation of flavonoid biosynthetic process	7	1	0	1	0	1	0	1	0	1	0	1	0	1	0	1	0	1	0	1	0	1	0	1	0	1	0	1	0	1	0	1	0	1	0	1	0
BP	GO:0009963	positive regulation of flavonoid biosynthetic process	409	0.00123369	64	0.51809	68	0.176763	28	0.308599	39	1	2	1	1	0.0854	41	0.11967	61	0.036588	35	0.00425068	60	1	1	1	0	0.107857	34	0.896132	42	0.160599	21	0.132367	31	1	0	1	0
BP	GO:0009965	leaf morphogenesis	600	0.589482	67	1	90	1	27	1	32	1	2	1	4	1	39	1	70	1	27	1	55	1	1	1	2	1	36	1	58	1	15	1	23	1	0	1	1
BP	GO:0009968	negative regulation of signal transduction	4	1	0	0.00671449	4	1	0	1	0	1	0	1	0	1	0	0.00405303	4	1	0	0.337837	2	1	0	1	0	1	0	0.00175547	4	1	0	1	0	1	0	1	0
BP	GO:0009969	xyloglucan biosynthetic process	23	1	0	0.253136	7	1	0	1	2	1	0	1	0	1	0	1	3	1	0	1	2	1	0	1	0	1	0	1	3	1	0	1	2	1	0	1	0
BP	GO:0009970	cellular response to sulfate starvation	50	1	4	0.741389	10	1	1	1	5	1	1	1	0	1	5	0.016295	14	1	2	0.836012	7	1	1	1	0	1	2	0.117432	10	1	1	1	3	1	0	1	0
BP	GO:0009972	cytidine deamination	6	1	0	1	1	1	0	1	0	1	0	1	0	1	0	1	1	1	0	1	1	1	0	1	0	1	0	1	0	1	0	1	0	1	0	1	0
BP	GO:0009991	response to extracellular stimulus	4	0.377063	2	1	0	0.209999	2	1	0	1	0	1	0	0.268236	2	1	0	0.249794	2	1	0	1	0	1	0	0.212717	2	1	0	0.12629	2	1	0	1	0	1	0
BP	GO:0009992	cellular water homeostasis	6	1	0	1	0	1	0	1	0	1	0	1	0	1	1	1	0	0.0648875	3	1	0	1	0	1	0	1	0	1	0	1	0	1	0	1	0	1	0
BP	GO:0010014	meristem initiation	390	1	36	3.20055e-05	91	0.114329	28	0.474352	36	1	2	1	0	1	30	0.0585374	61	0.783025	26	0.337837	46	1	2	1	0	0.677014	27	0.00592375	56	0.188329	20	0.37699	27	1	0	1	0
BP	GO:0010015	root morphogenesis	171	1	3	1.50388e-17	73	1	4	0.0203793	24	1	0	1	2	1	3	5.34842e-11	54	1	5	1.03773e-05	38	1	0	1	2	1	3	1.96119e-12	50	1	2	0.00115861	22	1	0	1	1
BP	GO:0010016	shoot system morphogenesis	27	1	1	1	2	1	1	1	1	1	0	1	0	1	0	1	2	1	0	1	2	1	0	1	0	1	0	1	1	1	0	1	1	1	0	1	0
BP	GO:0010017	red or far-red light signaling pathway	87	0.000484379	22	1	13	0.802855	7	1	8	1	0	1	1	0.281277	11	1	9	1	5	1	8	1	1	1	0	0.212717	10	1	8	1	3	0.497548	8	1	0	1	0
BP	GO:0010018	far-red light signaling pathway	4	1	0	0.00671449	4	1	0	1	0	1	0	1	0	1	0	0.409995	2	1	1	1	0	1	0	1	0	1	0	0.305813	2	1	0	1	0	1	0	1	0
BP	GO:0010019	chloroplast-nucleus signaling pathway	25	1	1	1	1	1	0	1	0	1	0	1	0	1	0	1	0	1	0	1	1	1	0	1	0	1	0	1	0	1	0	1	0	1	0	1	0
BP	GO:0010020	chloroplast fission	58	1	1	1	0	1	0	1	0	1	0	1	1	1	0	1	0	1	0	1	0	1	0	1	1	1	0	1	0	1	0	1	0	1	0	1	0
BP	GO:0010021	amylopectin biosynthetic process	15	1	0	1	2	1	0	1	1	1	0	1	0	1	2	1	0	1	0	1	2	1	0	1	0	1	0	1	0	1	0	1	1	1	0	1	0
BP	GO:0010022	meristem determinacy	11	1	0	0.123963	5	1	0	0.99031	2	1	0	1	0	1	0	0.628737	3	1	0	1	2	1	0	1	0	1	0	0.438873	3	1	0	0.665369	2	1	0	1	0
BP	GO:0010023	proanthocyanidin biosynthetic process	5	1	0	0.688106	2	1	0	1	0	1	1	1	0	1	0	1	0	1	0	1	1	1	0	1	0	1	0	1	0	1	0	1	0	1	0	1	0
BP	GO:0010024	phytochromobilin biosynthetic process	11	1	0	1	0	1	0	1	0	1	0	1	0	1	0	1	0	1	0	1	0	1	0	1	0	1	0	1	0	1	0	1	0	1	0	1	0
BP	GO:0010025	wax biosynthetic process	57	1	5	0.0594428	16	1	2	1	3	1	0	1	0	1	2	0.0473112	14	1	2	1	4	1	0	1	0	1	1	0.114528	11	1	1	1	1	1	0	1	0
BP	GO:0010026	trichome differentiation	56	1	0	0.0223965	17	1	0	1	5	1	1	1	0	1	0	0.820502	9	1	1	0.125411	11	1	0	1	0	1	0	0.690501	8	1	0	0.873478	5	1	0	1	0
BP	GO:0010027	thylakoid membrane organization	600	0.00176245	86	1	39	1	20	1	17	1	2	1	3	0.50557	49	1	28	1	22	1	32	1	0	1	1	0.483927	41	1	19	1	10	1	13	1	0	1	0
BP	GO:0010028	xanthophyll cycle	2	1	0	1	0	1	0	1	0	1	0	1	0	1	0	1	0	1	0	1	0	1	0	1	0	1	0	1	0	1	0	1	0	1	0	1	0
BP	GO:0010029	regulation of seed germination	159	0.163109	24	1	13	0.090675	15	1	6	1	2	1	2	1	13	1	13	0.124878	16	1	15	1	0	1	1	1	11	1	10	0.0683873	12	1	5	1	0	1	1
BP	GO:0010030	positive regulation of seed germination	52	1	5	1	9	1	1	1	4	1	0	1	0	1	5	1	4	1	1	1	5	1	0	1	0	1	3	1	4	1	1	1	3	1	0	1	0
BP	GO:0010031	circumnutation	18	0.231159	5	0.523339	5	0.0318601	5	1	0	1	0	1	0	1	1	1	1	0.209022	4	1	0	1	0	1	1	1	1	1	1	0.0518511	4	1	0	1	0	1	0
BP	GO:0010033	response to organic substance	6	1	0	1	1	1	0	1	1	1	1	1	0	1	0	0.695989	2	1	0	0.129114	3	1	0	1	0	1	0	1	1	1	0	1	1	1	0	1	0
BP	GO:0010036	response to boron-containing substance	13	0.742772	3	1	1	1	1	1	0	1	0	1	0	1	1	1	0	0.358852	3	1	0	1	0	1	0	1	1	1	0	1	1	1	0	1	0	1	0
BP	GO:0010037	response to carbon dioxide	13	1	0	0.000244097	9	1	0	0.000462658	7	1	0	1	0	1	0	0.0269592	6	1	0	0.00164673	7	1	0	1	0	1	0	0.0101647	6	1	0	0.000754885	6	1	0	1	0
BP	GO:0010038	response to metal ion	18	1	0	1	2	1	0	1	2	1	0	1	0	1	0	1	2	1	0	1	1	1	0	1	0	1	0	1	2	1	0	1	1	1	0	1	0
BP	GO:0010039	response to iron ion	89	1	4	1	12	1	0	0.968163	9	1	0	0.000393428	8	1	2	1	11	1	0	0.042134	17	1	0	1	0	1	1	1	7	1	0	0.887595	7	1	0	1	0
BP	GO:0010042	response to manganese ion	8	1	0	1	1	1	0	1	0	1	0	1	0	1	0	1	0	1	0	1	0	1	0	1	0	1	0	1	0	1	0	1	0	1	0	1	0
BP	GO:0010043	response to zinc ion	212	1	15	0.56852	37	1	10	0.738037	20	1	2	1	2	1	10	1	26	1	12	1	21	1	0	1	0	1	8	1	20	1	6	0.917775	14	1	0	1	0
BP	GO:0010044	response to aluminum ion	26	0.645106	5	1	0	0.391931	4	1	2	1	0	1	0	1	2	1	0	1	3	1	2	1	0	1	0	1	2	1	0	1	2	1	2	1	0	1	0
BP	GO:0010045	response to nickel cation	5	1	0	1	0	1	0	1	0	1	0	1	0	1	0	1	0	1	0	1	0	1	0	1	0	1	0	1	0	1	0	1	0	1	0	1	0
BP	GO:0010046	response to mycotoxin	6	1	0	1	0	1	0	1	0	1	0	1	0	1	0	1	0	1	0	1	0	1	0	1	0	1	0	1	0	1	0	1	0	1	0	1	0
BP	GO:0010047	fruit dehiscence	17	1	0	1	1	1	0	1	1	1	0	1	0	1	0	1	3	1	0	1	1	1	0	1	0	1	0	1	1	1	0	1	1	1	0	1	0
BP	GO:0010048	vernalization response	296	1	19	1	14	1	10	1	9	1	0	1	0	1	9	1	17	1	6	1	9	1	0	1	0	1	7	1	9	1	1	1	5	1	0	1	0
BP	GO:0010050	vegetative phase change	205	1	12	1	12	1	7	1	2	1	0	1	1	1	6	1	6	1	4	1	5	1	0	1	0	1	6	1	5	1	4	1	2	1	0	1	0
BP	GO:0010051	xylem and phloem pattern formation	219	1	7	9.74676e-06	60	1	3	1	18	1	0	1	2	1	6	0.00129175	45	1	4	0.455602	27	1	0	1	1	1	4	6.15399e-05	42	1	1	1	8	1	0	1	0
BP	GO:0010052	guard cell differentiation	28	1	1	1	5	1	0	1	0	1	0	1	0	1	1	1	2	1	2	1	0	1	1	1	0	1	1	1	1	1	0	1	0	1	0	1	0
BP	GO:0010053	root epidermal cell differentiation	76	1	3	1	11	1	3	0.628615	9	1	0	1	0	1	3	1	5	1	5	1	8	1	0	1	0	1	3	1	5	1	3	0.984561	6	1	0	1	0
BP	GO:0010054	trichoblast differentiation	123	1	5	4.00303e-11	50	1	0	1.80085e-24	52	1	0	1	0	1	9	0.156519	22	1	0	0.00669024	24	1	0	1	0	1	5	0.0769388	20	1	0	3.94582e-05	21	1	0	1	0
BP	GO:0010059	positive regulation of atrichoblast fate specification	5	1	0	0.688106	2	1	0	1	0	1	0	1	0	1	0	0.574338	2	1	0	1	0	1	0	1	0	1	0	1	1	1	0	1	0	1	0	1	0
BP	GO:0010062	negative regulation of trichoblast fate specification	2	1	0	1	0	1	0	1	0	1	0	1	0	1	0	1	0	1	0	1	0	1	0	1	0	1	0	1	0	1	0	1	0	1	0	1	0
BP	GO:0010063	positive regulation of trichoblast fate specification	11	1	0	0.843331	3	1	0	1	1	1	0	1	0	1	0	0.628737	3	1	0	1	0	1	0	1	0	1	0	1	2	1	0	1	0	1	0	1	0
BP	GO:0010064	embryonic shoot morphogenesis	5	1	0	1	0	1	0	1	0	1	1	1	0	1	0	1	0	1	0	1	0	1	0	1	0	1	0	1	0	1	0	1	0	1	0	1	0
BP	GO:0010067	procambium histogenesis	27	1	0	0.00301848	12	1	0	0.127209	6	1	0	1	0	1	0	0.0305975	9	1	0	0.00210993	10	1	0	1	0	1	0	0.007945	9	1	0	0.125374	5	1	0	1	0
BP	GO:0010068	protoderm histogenesis	6	1	0	1	0	1	0	1	0	1	0	1	0	1	0	1	0	1	0	1	0	1	0	1	0	1	0	1	0	1	0	1	0	1	0	1	0
BP	GO:0010069	zygote asymmetric cytokinesis in embryo sac	2	1	0	0.157942	2	1	0	1	0	1	0	1	0	1	0	0.922643	1	1	0	0.836012	1	1	0	1	0	1	0	0.850511	1	1	0	1	0	1	0	1	0
BP	GO:0010070	zygote asymmetric cell division	3	1	1	1	0	1	0	1	0	1	0	1	0	1	1	1	0	1	1	1	0	1	0	1	0	0.99561	1	1	0	1	0	1	0	1	0	1	0
BP	GO:0010071	root meristem specification	16	1	2	1	2	1	2	1	0	1	0	1	0	1	1	1	2	1	0	1	1	1	0	1	0	1	0	1	1	1	0	1	0	1	0	1	0
BP	GO:0010072	primary shoot apical meristem specification	175	1	5	1	20	1	4	1	4	1	0	1	2	1	2	1	14	1	3	1	7	1	0	1	1	1	2	1	12	1	1	1	2	1	0	1	0
BP	GO:0010073	meristem maintenance	234	1	5	0.000334628	58	1	4	1	12	1	1	1	1	1	2	0.11967	38	1	3	0.836012	26	1	0	1	0	1	1	0.0449497	34	1	1	1	9	1	0	1	0
BP	GO:0010074	maintenance of meristem identity	94	1	6	1	7	1	1	1	1	1	0	0.563328	4	1	5	1	3	1	0	1	1	1	0	1	1	1	5	1	2	1	0	1	0	1	0	1	0
BP	GO:0010075	regulation of meristem growth	538	1	47	4.22759e-27	180	0.0147411	40	3.47445e-05	70	1	8	1	0	0.741903	43	3.5007e-20	141	1	31	1.00615e-13	110	1	2	1	0	0.303272	39	2.47496e-22	127	0.239498	25	8.45207e-07	59	1	0	1	0
BP	GO:0010076	maintenance of floral meristem identity	16	1	0	1	0	1	0	1	0	1	0	1	0	1	0	1	0	1	0	1	2	1	0	1	0	1	0	1	0	1	0	1	0	1	0	1	0
BP	GO:0010077	maintenance of inflorescence meristem identity	19	1	0	1	1	1	0	1	0	1	0	1	1	1	0	1	0	1	0	1	0	1	0	1	0	1	0	1	0	1	0	1	0	1	0	1	0
BP	GO:0010078	maintenance of root meristem identity	27	1	2	1	4	1	2	1	2	1	0	1	0	1	1	1	2	1	0	0.274611	6	1	0	1	0	1	0	1	2	1	0	1	1	1	0	1	0
BP	GO:0010080	regulation of floral meristem growth	11	0.562409	3	0.843331	3	0.843354	2	1	0	1	0	1	0	1	2	1	2	1	0	1	0	1	0	1	0	0.805946	2	1	2	1	0	1	0	1	0	1	0
BP	GO:0010081	regulation of inflorescence meristem growth	4	1	0	0.102204	3	1	0	1	0	1	0	1	0	1	0	0.409995	2	1	0	1	0	1	0	1	0	1	0	0.305813	2	1	0	1	0	1	0	1	0
BP	GO:0010082	regulation of root meristem growth	56	1	3	1	10	1	3	1	1	1	1	1	0	1	1	1	7	1	1	1	4	1	0	1	0	1	1	1	7	1	1	1	1	1	0	1	0
BP	GO:0010084	specification of animal organ axis polarity	2	1	0	1	0	1	0	1	0	1	0	1	0	1	0	1	0	1	0	1	0	1	0	1	0	1	0	1	0	1	0	1	0	1	0	1	0
BP	GO:0010086	embryonic root morphogenesis	15	1	1	0.704721	4	1	0	0.628615	3	1	0	1	1	1	2	0.966782	3	1	0	0.817781	3	1	0	1	1	1	1	1	2	1	0	0.984561	2	1	0	1	1
BP	GO:0010087	phloem or xylem histogenesis	73	1	3	0.956022	13	1	0	1	6	1	0	1	0	1	0	1	10	1	0	1	7	1	0	1	0	1	0	1	8	1	0	1	3	1	0	1	0
BP	GO:0010088	phloem development	11	1	0	1	1	1	0	1	0	1	0	1	0	1	0	1	2	1	0	1	0	1	0	1	0	1	0	1	1	1	0	1	0	1	0	1	0
BP	GO:0010089	xylem development	248	0.65287	30	3.85573e-09	75	0.0666631	21	3.63284e-06	43	1	2	1	1	0.343876	24	0.000883141	50	0.74402	18	7.31892e-07	52	1	1	1	0	0.401476	20	5.42449e-05	46	0.0685039	16	3.94582e-05	32	1	0	1	0
BP	GO:0010090	trichome morphogenesis	464	1	14	0.655341	75	1	3	1	22	1	1	1	2	1	12	1	48	1	8	1	28	1	1	1	0	1	10	1	39	1	1	1	14	1	0	1	0
BP	GO:0010091	trichome branching	111	1	10	1	15	1	6	1	6	1	1	1	1	1	6	1	10	1	6	1	9	1	0	1	0	1	5	1	8	1	4	1	5	1	0	1	0
BP	GO:0010093	specification of floral organ identity	52	1	3	1	7	1	1	1	2	1	1	1	0	1	2	1	6	1	1	1	1	1	0	1	0	1	2	1	4	1	1	1	0	1	0	1	0
BP	GO:0010094	specification of carpel identity	2	0.11299	2	1	0	1	0	1	0	1	0	1	0	0.898895	1	1	0	0.926819	1	1	0	1	0	1	0	0.772216	1	1	0	1	0	1	0	1	0	1	0
BP	GO:0010098	suspensor development	6	1	0	1	0	1	0	1	0	1	0	1	0	1	0	1	0	1	0	1	0	1	0	1	0	1	0	1	0	1	0	1	0	1	0	1	0
BP	GO:0010099	regulation of photomorphogenesis	26	0.00847122	9	1	1	0.93093	3	1	0	1	0	1	0	0.0289453	7	1	1	1	2	1	0	1	0	1	0	0.0490613	6	1	0	1	1	1	0	1	0	1	0
BP	GO:0010100	negative regulation of photomorphogenesis	45	1	6	1	1	1	2	1	0	1	0	1	1	0.603874	6	1	0	1	2	1	0	1	0	1	0	0.693629	5	1	0	1	1	1	0	1	0	1	0
BP	GO:0010102	lateral root morphogenesis	60	1	4	0.0437473	17	1	1	0.254821	9	1	0	1	1	1	3	0.419652	11	1	4	0.844608	8	1	0	1	3	1	2	0.299673	10	1	1	0.116454	8	1	0	1	1
BP	GO:0010103	stomatal complex morphogenesis	425	1	43	1	62	1	20	1	22	1	4	1	1	1	27	1	47	1	18	1	34	1	1	1	1	1	23	1	39	1	12	1	12	1	0	1	0
BP	GO:0010104	regulation of ethylene-activated signaling pathway	13	0.742772	3	1	2	1	1	1	0	1	0	1	0	0.138764	4	1	0	1	1	1	0	1	0	1	0	0.331591	3	1	0	1	0	1	0	1	0	1	0
BP	GO:0010105	negative regulation of ethylene-activated signaling pathway	41	0.00179465	13	1	3	1	3	1	1	1	1	1	0	6.11845e-05	13	1	1	1	2	1	2	1	0	1	0	0.000297312	11	1	1	1	2	1	1	1	0	1	0
BP	GO:0010106	cellular response to iron ion starvation	323	1	22	6.68719e-17	109	1	10	9.07914e-11	62	1	1	1	5	1	17	5.7285e-09	77	1	20	1.86446e-09	69	0.271041	4	1	0	1	17	2.01145e-08	65	1	10	9.00459e-05	37	1	0	1	0
BP	GO:0010107	potassium ion import	17	0.190293	5	0.18447	6	0.133683	4	1	0	1	0	1	0	0.0848316	5	1	3	0.181308	4	1	0	1	0	1	0	0.0415666	5	0.904099	3	0.0451312	4	1	0	1	0	1	0
BP	GO:0010109	regulation of photosynthesis	10	1	2	1	1	1	1	1	1	1	0	1	0	0.923128	2	1	2	1	0	1	1	1	0	1	0	0.7427	2	1	1	1	0	1	1	1	0	1	0
BP	GO:0010111	glyoxysome organization	7	1	1	1	0	1	0	1	0	1	0	1	0	1	0	1	0	1	0	1	1	1	0	1	0	1	0	1	0	1	0	1	0	1	0	1	0
BP	GO:0010112	regulation of systemic acquired resistance	33	1	2	1	1	1	0	1	0	1	0	1	0	1	3	1	0	1	2	1	0	1	0	1	0	1	2	1	0	1	0	1	0	1	0	1	0
BP	GO:0010113	negative regulation of systemic acquired resistance	8	0.298573	3	1	1	1	1	1	0	1	0	1	0	0.191058	3	1	1	0.671987	2	0.830673	2	1	0	1	0	0.582956	2	1	1	1	1	1	0	1	0	1	0
BP	GO:0010114	response to red light	330	9.75721e-08	67	1	31	1	16	1	25	1	1	1	3	0.100242	34	1	28	1	15	1	30	1	0	1	0	0.0190129	32	1	22	1	8	1	20	1	0	1	0
BP	GO:0010115	regulation of abscisic acid biosynthetic process	9	1	2	1	1	1	1	1	0	1	0	1	0	0.849485	2	1	1	1	1	1	0	1	0	1	0	0.671845	2	1	1	1	1	1	0	1	0	1	0
BP	GO:0010116	positive regulation of abscisic acid biosynthetic process	2	1	0	0.982512	1	1	0	0.802657	1	1	0	1	0	1	0	1	0	1	0	1	0	1	0	1	0	1	0	1	0	1	0	1	0	1	0	1	0
BP	GO:0010117	photoprotection	22	0.0119806	8	1	2	0.743964	3	1	2	1	0	1	0	0.00178292	8	1	1	0.926819	3	1	2	1	0	1	0	0.0236856	6	1	1	0.408482	3	1	1	1	0	1	0
BP	GO:0010118	stomatal movement	152	0.781774	19	0.982512	25	1	6	0.544333	16	1	1	1	1	1	12	0.498092	23	1	9	0.0238112	26	1	0	1	1	0.772216	12	0.521759	19	1	5	0.321742	13	1	0	1	0
BP	GO:0010119	regulation of stomatal movement	174	1	8	0.235751	34	1	6	0.045632	23	1	0	1	3	1	8	0.0719928	31	1	6	0.642756	21	1	0	1	0	1	4	0.117432	25	1	5	0.143761	16	1	0	1	0
BP	GO:0010120	camalexin biosynthetic process	36	0.18863	8	1	4	1	3	1	2	1	1	1	0	0.136517	7	1	3	0.431382	5	1	2	1	0	1	0	0.41367	5	1	3	1	2	1	2	1	0	1	0
BP	GO:0010133	proline catabolic process to glutamate	3	1	1	1	0	1	1	1	0	1	0	1	0	1	1	1	0	1	1	0.21553	2	1	0	1	0	0.99561	1	1	0	0.989552	1	1	0	1	0	1	0
BP	GO:0010136	ureide catabolic process	12	1	1	1	2	1	1	1	0	1	0	1	0	1	1	0.27574	4	1	1	1	0	1	0	1	0	1	1	1	2	1	1	1	0	1	0	1	0
BP	GO:0010143	cutin biosynthetic process	22	1	2	0.473388	6	1	1	1	1	1	0	1	0	1	1	0.0939284	7	1	2	0.337863	5	1	0	1	0	1	1	0.112529	6	1	1	1	1	1	0	1	0
BP	GO:0010148	transpiration	15	0.377063	4	1	2	1	0	1	1	1	0	1	0	0.603874	3	1	1	1	0	1	0	1	0	1	0	0.432292	3	1	1	1	0	1	0	1	0	1	0
BP	GO:0010150	leaf senescence	233	0.39271	30	1	22	1	10	1	11	1	3	1	1	1	12	1	17	1	7	1	16	1	0	1	0	1	11	1	12	1	4	1	10	1	0	1	0
BP	GO:0010152	pollen maturation	41	1	1	1	4	1	0	1	0	1	0	1	0	1	1	1	3	1	0	1	4	1	0	1	0	1	0	1	3	1	0	1	0	1	0	1	0
BP	GO:0010154	fruit development	95	1	10	1	15	1	6	0.179263	13	1	1	1	2	1	9	1	12	0.313067	10	0.571801	13	1	0	1	0	0.574951	9	1	10	1	4	1	7	1	0	1	0
BP	GO:0010155	regulation of proton transport	252	5.11369e-07	54	1	21	1	9	1	15	1	0	1	0	1	18	1	21	1	5	1	15	1	0	1	0	1	16	1	16	1	4	1	9	1	0	1	0
BP	GO:0010157	response to chlorate	6	1	1	1	0	1	0	1	0	1	0	1	0	1	0	1	0	1	0	1	0	1	0	1	0	1	0	1	0	1	0	1	0	1	0	1	0
BP	GO:0010158	abaxial cell fate specification	24	1	0	1	4	1	0	1	1	1	0	1	0	1	1	1	4	1	0	1	2	1	0	1	0	1	0	1	3	1	0	1	1	1	0	1	0
BP	GO:0010159	specification of animal organ position	4	1	0	1	0	1	0	1	0	1	0	1	0	1	0	1	0	1	0	1	0	1	0	1	0	1	0	1	0	1	0	1	0	1	0	1	0
BP	GO:0010160	formation of animal organ boundary	4	1	0	0.51809	2	1	0	0.273715	2	1	0	1	0	1	0	0.409995	2	1	0	0.337837	2	1	0	1	0	1	0	0.305813	2	1	0	0.164787	2	1	0	1	0
BP	GO:0010161	red light signaling pathway	25	1	1	1	4	1	1	1	3	1	0	1	0	1	0	1	3	1	0	1	2	1	0	1	0	1	0	1	2	1	0	1	2	1	0	1	0
BP	GO:0010162	seed dormancy process	417	1	28	1	57	1	17	1	13	1	5	1	8	1	22	1	46	1	18	1	34	0.584047	4	1	3	1	16	1	41	1	11	1	11	1	0	1	0
BP	GO:0010165	response to X-ray	10	1	0	1	0	1	0	1	0	1	0	1	0	1	0	1	0	1	0	1	0	1	0	1	0	1	0	1	0	1	0	1	0	1	0	1	0
BP	GO:0010167	response to nitrate	637	1	67	1.14683e-23	194	1	25	5.56021e-19	117	1	3	1	9	0.380712	53	1.81885e-20	159	0.0941884	47	3.89238e-13	122	1	0	1	0	0.304217	45	4.36375e-18	132	1	24	1.14678e-07	69	1	0	1	0
BP	GO:0010182	sugar mediated signaling pathway	336	1	24	1	22	1	8	1	4	1	3	1	3	1	13	1	16	1	8	1	10	0.301749	4	1	2	1	10	1	11	1	4	1	3	1	0	1	0
BP	GO:0010183	pollen tube guidance	35	0.692743	6	1	4	1	1	1	2	1	1	1	1	1	3	1	5	1	3	1	4	1	0	1	0	1	2	1	4	1	1	1	2	1	0	1	0
BP	GO:0010184	cytokinin transport	4	1	0	0.51809	2	1	0	1	0	1	0	1	0	1	0	1	1	1	0	1	1	1	0	1	0	1	0	1	1	1	0	1	0	1	0	1	0
BP	GO:0010186	positive regulation of cellular defense response	3	1	0	1	0	1	0	1	0	1	0	1	0	1	0	1	0	1	0	1	0	1	0	1	0	1	0	1	0	1	0	1	0	1	0	1	0
BP	GO:0010187	negative regulation of seed germination	64	1	4	1	10	1	3	1	6	1	0	1	1	1	0	1	9	1	0	1	6	1	0	1	1	1	0	1	7	1	0	1	5	1	0	1	0
BP	GO:0010188	response to microbial phytotoxin	29	1	1	0.293836	8	1	0	1	3	1	0	1	0	1	3	0.574338	6	1	0	1	4	1	0	1	0	1	1	0.637012	5	1	0	0.985905	3	1	0	1	0
BP	GO:0010189	vitamin E biosynthetic process	20	0.00616935	8	1	1	1	2	1	1	1	0	1	0	1	2	1	1	1	2	1	1	1	0	1	0	1	2	1	0	1	0	1	1	1	0	1	0
BP	GO:0010190	cytochrome b6f complex assembly	17	1	3	1	1	1	0	1	0	1	0	1	0	1	2	1	0	1	0	0.919059	3	1	0	1	0	1	1	1	0	1	0	1	0	1	0	1	0
BP	GO:0010192	mucilage biosynthetic process	7	1	1	0.982512	2	0.494687	2	1	1	1	0	1	0	1	1	1	1	0.562553	2	0.716567	2	1	0	1	0	1	1	1	1	1	1	1	1	1	0	1	0
BP	GO:0010193	response to ozone	120	1	10	1	7	1	3	1	3	1	0	1	0	1	10	1	3	0.7845	10	1	3	1	0	1	1	1	8	1	3	1	3	1	1	1	0	1	0
BP	GO:0010196	nonphotochemical quenching	29	0.818436	5	1	2	1	0	1	3	1	0	1	0	1	1	1	2	1	2	1	3	1	0	1	0	1	1	1	2	1	0	1	2	1	0	1	0
BP	GO:0010197	polar nucleus fusion	56	1	1	0.741389	11	1	1	1	0	1	0	1	1	1	1	0.318222	11	1	1	1	4	1	0	1	0	1	0	0.396623	9	1	1	1	0	1	0	1	0
BP	GO:0010198	synergid death	5	1	0	1	0	1	0	1	0	1	0	1	0	1	0	1	0	1	0	1	0	1	0	1	0	1	0	1	0	1	0	1	0	1	0	1	0
BP	GO:0010199	organ boundary specification between lateral organs and the meristem	11	1	0	1	0	1	0	1	0	1	0	1	0	1	0	1	0	1	0	1	0	1	0	1	0	1	0	1	0	1	0	1	0	1	0	1	0
BP	GO:0010200	response to chitin	1526	1.83202e-51	345	1	111	4.09009e-15	138	1	63	1	8	1	3	4.09108e-53	277	1	102	1.28978e-41	215	1	68	1	4	1	1	1.24859e-39	219	1	67	7.02007e-20	118	1	41	1	0	1	0
BP	GO:0010201	response to continuous far red light stimulus by the high-irradiance response system	11	1	0	1	2	1	0	1	1	1	0	1	0	1	0	1	2	1	0	1	1	1	0	1	0	1	0	1	2	1	0	1	1	1	0	1	0
BP	GO:0010202	response to low fluence red light stimulus	3	1	0	1	0	1	0	1	0	1	0	1	0	1	0	1	0	1	0	1	0	1	0	1	0	1	0	1	0	1	0	1	0	1	0	1	0
BP	GO:0010203	response to very low fluence red light stimulus	4	1	0	0.51809	2	1	0	1	1	1	0	1	0	1	0	0.409995	2	1	0	1	1	1	0	1	0	1	0	0.305813	2	1	0	1	1	1	0	1	0
BP	GO:0010204	defense response signaling pathway, resistance gene-independent	49	0.0768851	11	1	4	1	4	1	0	1	0	1	0	0.76733	6	1	1	1	4	1	2	1	0	1	0	0.436221	6	1	1	1	3	1	0	1	0	1	0
BP	GO:0010205	photoinhibition	32	0.267109	7	1	2	1	0	1	1	1	1	1	0	1	2	1	3	1	1	1	3	1	0	1	0	1	1	1	2	1	0	1	1	1	0	1	0
BP	GO:0010206	photosystem II repair	31	0.0307653	9	1	2	1	3	1	1	1	0	1	0	0.464323	5	1	2	1	1	1	1	1	0	1	0	0.671845	4	1	1	1	1	1	1	1	0	1	0
BP	GO:0010207	photosystem II assembly	517	1.46919e-09	98	1	21	1	19	1	8	1	3	1	0	0.928506	40	1	15	1	17	1	20	1	0	1	0	0.486435	36	1	6	1	9	1	6	1	0	1	0
BP	GO:0010208	pollen wall assembly	13	1	1	1	3	1	0	1	2	1	0	1	0	1	1	1	1	1	1	1	1	1	0	1	0	1	0	1	1	1	0	1	0	1	0	1	0
BP	GO:0010212	response to ionizing radiation	49	1	4	1	2	1	1	1	0	1	0	1	2	1	3	1	1	1	4	1	0	1	0	1	0	1	3	1	0	1	1	1	0	1	0	1	0
BP	GO:0010213	non-photoreactive DNA repair	6	1	0	1	0	1	0	1	0	1	0	1	0	1	0	1	0	1	0	1	0	1	0	1	0	1	0	1	0	1	0	1	0	1	0	1	0
BP	GO:0010214	seed coat development	41	1	0	0.102204	12	1	0	0.0948364	8	1	0	1	1	1	0	0.122648	10	1	1	0.115703	9	1	0	1	0	1	0	0.22461	8	1	0	0.0563944	7	1	0	1	0
BP	GO:0010215	cellulose microfibril organization	19	1	0	1	2	1	0	1	1	1	0	1	0	1	0	1	0	1	0	1	0	1	0	1	0	1	0	1	0	1	0	1	0	1	0	1	0
BP	GO:0010216	maintenance of DNA methylation	18	1	1	0.235106	6	1	0	1	0	1	0	1	0	1	1	1	2	1	0	1	1	1	0	1	0	1	1	1	2	1	0	1	0	1	0	1	0
BP	GO:0010218	response to far red light	320	9.25672e-05	57	1	29	1	15	1	16	1	1	1	0	0.240496	31	1	28	1	15	1	22	1	0	1	0	0.0630082	29	1	21	1	9	1	11	1	0	1	0
BP	GO:0010219	regulation of vernalization response	3	1	0	1	1	1	0	1	0	1	0	1	0	1	0	1	0	1	0	1	0	1	0	1	0	1	0	1	0	1	0	1	0	1	0	1	0
BP	GO:0010220	positive regulation of vernalization response	9	1	0	1	1	1	1	1	0	1	0	1	0	1	0	1	0	1	0	1	0	1	0	1	1	1	0	1	0	1	0	1	0	1	0	1	0
BP	GO:0010221	negative regulation of vernalization response	1	1	0	1	0	1	0	1	0	1	0	1	0	1	0	1	0	1	0	1	0	1	0	1	0	1	0	1	0	1	0	1	0	1	0	1	0
BP	GO:0010222	stem vascular tissue pattern formation	17	1	0	0.0727743	7	1	0	1	2	1	0	1	0	1	0	0.0250782	7	1	1	1	2	1	0	1	0	1	0	0.0396722	6	1	0	1	1	1	0	1	0
BP	GO:0010223	secondary shoot formation	20	1	2	0.33767	6	1	1	1	2	1	0	1	0	1	2	0.858656	4	1	2	0.60869	4	1	0	1	0	1	2	0.566501	4	1	1	1	2	1	0	1	0
BP	GO:0010224	response to UV-B	310	6.40014e-07	62	1	35	1	16	1	15	1	1	1	0	1.89123e-07	50	1	27	0.317591	24	1	19	1	0	1	3	5.77375e-05	38	1	21	1	12	1	7	1	0	1	0
BP	GO:0010225	response to UV-C	10	1	0	1	0	1	0	1	0	1	0	1	0	1	0	1	0	1	1	1	0	1	0	1	0	1	0	1	0	1	0	1	0	1	0	1	0
BP	GO:0010226	response to lithium ion	2	1	0	0.982512	1	1	0	1	0	1	0	1	0	1	0	1	0	1	0	1	0	1	0	1	1	1	0	1	0	1	0	1	0	1	0	1	0
BP	GO:0010227	floral organ abscission	97	0.336815	15	1	13	1	3	1	7	1	0	1	0	0.774506	10	1	12	1	4	1	9	1	0	1	0	0.354808	10	1	7	1	1	1	6	1	0	1	0
BP	GO:0010228	vegetative to reproductive phase transition of meristem	986	1	45	1	105	1	23	1	30	1	7	1	5	1	32	1	75	1	30	1	47	0.231372	7	1	4	1	21	1	61	1	14	1	20	1	1	1	0
BP	GO:0010229	inflorescence development	42	1	4	1	3	1	1	1	1	1	2	1	0	1	4	1	4	1	0	1	3	1	0	1	0	1	3	1	3	1	0	1	1	1	0	1	0
BP	GO:0010230	alternative respiration	3	1	0	1	0	1	0	1	0	1	0	1	0	1	0	1	0	1	0	1	0	1	0	1	0	1	0	1	0	1	0	1	0	1	0	1	0
BP	GO:0010231	maintenance of seed dormancy	6	1	0	1	0	1	0	1	0	1	0	1	0	1	0	1	0	1	0	1	0	1	0	1	0	1	0	1	0	1	0	1	0	1	0	1	0
BP	GO:0010233	phloem transport	30	1	1	1.73497e-05	16	1	1	0.0655025	7	1	0	1	2	1	1	0.00029703	13	1	1	0.000203053	12	1	0	1	0	1	1	0.000153963	12	1	1	0.012956	7	1	0	1	0
BP	GO:0010235	guard mother cell cytokinesis	7	1	1	1	0	1	1	1	0	1	0	1	0	1	1	1	1	1	1	1	0	1	0	1	0	1	1	1	0	1	1	1	0	1	0	1	0
BP	GO:0010236	plastoquinone biosynthetic process	17	0.190293	5	1	1	1	2	1	0	1	0	1	0	1	2	1	1	1	0	1	0	1	0	1	0	1	2	1	1	1	0	1	0	1	0	1	0
BP	GO:0010239	chloroplast mRNA processing	10	1	0	1	0	1	0	1	0	1	0	1	0	1	0	1	0	1	0	1	0	1	0	1	0	1	0	1	0	1	0	1	0	1	0	1	0
BP	GO:0010241	ent-kaurene oxidation to kaurenoic acid	2	0.11299	2	1	0	1	0	1	0	1	0	1	0	0.898895	1	1	0	1	0	1	0	1	0	1	0	0.772216	1	1	0	1	0	1	0	1	0	1	0
BP	GO:0010243	response to organonitrogen compound	2	1	0	1	0	1	0	1	0	1	0	1	0	1	0	1	0	1	0	0.836012	1	1	0	1	0	1	0	1	0	1	0	1	0	1	0	1	0
BP	GO:0010244	response to low fluence blue light stimulus by blue low-fluence system	11	1	0	1	2	1	0	1	0	1	0	1	0	1	0	1	1	1	0	1	0	1	0	1	0	1	0	1	1	1	0	1	0	1	0	1	0
BP	GO:0010245	radial microtubular system formation	2	1	0	0.982512	1	1	0	1	0	1	0	1	0	1	0	1	0	1	0	1	0	1	0	1	0	1	0	1	0	1	0	1	0	1	0	1	0
BP	GO:0010247	detection of phosphate ion	6	0.15562	3	1	0	1	1	1	0	1	0	1	0	0.0934422	3	1	0	0.446295	2	1	0	1	0	1	0	0.401476	2	1	0	1	1	1	0	1	0	1	0
BP	GO:0010248	establishment or maintenance of transmembrane electrochemical gradient	8	0.0618777	4	0.156681	4	0.111484	3	1	1	1	0	1	0	0.191058	3	0.356592	3	0.671987	2	1	1	1	0	1	0	0.125155	3	0.235509	3	0.363164	2	1	1	1	0	1	0
BP	GO:0010252	auxin homeostasis	73	1	6	0.0338042	20	1	1	0.0302922	13	1	0	1	2	1	4	0.0733999	16	1	1	0.0361132	15	1	0	1	2	1	4	0.0283579	15	1	1	0.0473601	10	1	0	1	1
BP	GO:0010253	UDP-rhamnose biosynthetic process	15	1	1	0.00687436	8	1	0	1	2	1	0	1	0	1	1	0.482148	4	1	0	0.100861	5	1	0	1	0	1	1	0.304423	4	1	0	0.984561	2	1	0	1	0
BP	GO:0010254	nectary development	4	1	0	0.51809	2	1	0	0.273715	2	1	0	1	0	1	0	1	1	1	0	0.337837	2	1	0	1	0	1	0	1	1	1	0	0.164787	2	1	0	1	0
BP	GO:0010255	glucose mediated signaling pathway	11	1	0	1	1	1	0	1	0	1	0	1	0	1	0	1	1	1	0	1	1	1	0	1	0	1	0	1	1	1	0	1	0	1	0	1	0
BP	GO:0010256	endomembrane system organization	14	1	0	1	0	1	1	1	0	1	0	1	0	1	0	1	0	1	1	1	0	1	0	1	0	1	0	1	0	1	1	1	0	1	0	1	0
BP	GO:0010258	NADH dehydrogenase complex (plastoquinone) assembly	6	1	0	1	0	1	0	1	0	1	0	1	0	1	0	1	0	1	0	1	0	1	0	1	0	1	0	1	0	1	0	1	0	1	0	1	0
BP	GO:0010260	animal organ senescence	94	0.163263	16	1	10	1	3	1	2	1	1	1	0	1	7	1	7	1	4	1	5	1	0	1	0	1	6	1	4	1	1	1	1	1	0	1	0
BP	GO:0010262	somatic embryogenesis	28	1	3	1	3	1	1	1	2	1	0	1	0	1	3	1	2	1	1	1	2	1	0	1	0	1	2	1	2	1	1	1	2	1	0	1	0
BP	GO:0010264	myo-inositol hexakisphosphate biosynthetic process	187	1.68324e-06	43	1	12	0.0782377	17	1	13	1	0	1	0	2.6881e-05	32	1	11	0.356479	16	0.716567	22	1	0	1	0	1.04016e-05	29	1	6	0.038578	14	1	11	1	0	1	0
BP	GO:0010265	SCF complex assembly	5	1	0	1	0	1	0	1	0	1	0	1	0	1	0	1	0	1	0	1	0	1	0	1	0	1	0	1	0	1	0	1	0	1	0	1	0
BP	GO:0010266	response to vitamin B1	6	1	0	1	0	1	0	1	0	1	1	1	0	1	0	1	0	1	0	1	0	1	0	1	0	1	0	1	0	1	0	1	0	1	0	1	0
BP	GO:0010267	production of ta-siRNAs involved in RNA interference	312	1	11	1	38	1	5	1	7	1	0	1	0	1	8	1	20	1	3	1	14	1	0	1	1	1	7	1	20	1	3	1	6	1	0	1	0
BP	GO:0010268	brassinosteroid homeostasis	24	1	1	0.0147101	10	1	1	1	3	1	0	1	0	1	1	0.126704	7	1	0	1	2	1	0	1	0	1	1	0.157682	6	1	0	1	2	1	0	1	0
BP	GO:0010269	response to selenium ion	1	1	0	1	0	1	0	1	0	1	0	1	0	1	0	1	0	1	0	0.576733	1	1	0	1	0	1	0	1	0	1	0	1	0	1	0	1	0
BP	GO:0010270	photosystem II oxygen evolving complex assembly	8	0.0618777	4	1	0	1	0	1	1	1	0	1	0	1	0	1	0	1	0	0.830673	2	1	0	1	0	1	0	1	0	1	0	1	1	1	0	1	0
BP	GO:0010271	regulation of chlorophyll catabolic process	11	1	1	1	1	1	0	1	0	1	0	1	0	1	0	1	1	1	0	1	0	1	0	1	0	1	0	1	1	1	0	1	0	1	0	1	0
BP	GO:0010273	detoxification of copper ion	7	0.818436	2	1	0	1	1	1	1	1	0	1	0	0.609835	2	1	0	1	0	1	0	1	0	1	0	0.486435	2	1	0	1	0	1	0	1	0	1	0
BP	GO:0010274	hydrotropism	7	1	1	1	1	1	0	1	0	1	0	1	0	1	0	1	0	1	0	0.716567	2	1	0	1	0	1	0	1	0	1	0	1	0	1	0	1	0
BP	GO:0010275	NAD(P)H dehydrogenase complex assembly	6	1	0	1	0	1	0	1	0	1	0	1	0	1	0	1	0	1	0	1	0	1	0	1	0	1	0	1	0	1	0	1	0	1	0	1	0
BP	GO:0010286	heat acclimation	285	4.3299e-22	89	1	14	0.00827768	26	1	19	1	2	1	2	2.07213e-13	59	1	11	2.06166e-10	46	1	12	0.0576363	5	1	0	8.10267e-12	50	1	9	0.011214	20	1	8	1	1	1	0
BP	GO:0010288	response to lead ion	11	1	0	1	0	1	0	1	0	1	0	1	0	1	0	1	0	1	0	1	0	1	0	1	0	1	0	1	0	1	0	1	0	1	0	1	0
BP	GO:0010289	homogalacturonan biosynthetic process	19	1	0	1	2	1	0	1	0	1	0	1	0	1	1	1	1	1	0	1	0	1	0	1	0	1	0	1	1	1	0	1	0	1	0	1	0
BP	GO:0010299	detoxification of cobalt ion	1	1	0	1	0	1	0	1	0	1	0	1	0	1	0	1	0	1	0	1	0	1	0	1	0	1	0	1	0	1	0	1	0	1	0	1	0
BP	GO:0010304	PSII associated light-harvesting complex II catabolic process	85	0.00101139	21	1	7	1	2	1	3	1	0	1	0	0.147289	12	1	7	1	2	1	7	1	0	1	0	0.0431249	12	1	3	1	0	1	2	1	0	1	0
BP	GO:0010305	leaf vascular tissue pattern formation	102	1	4	0.32714	21	1	1	1	4	1	0	1	2	1	1	0.0287262	22	1	0	1	9	1	0	1	0	1	1	0.0936553	17	1	0	1	3	1	0	1	0
BP	GO:0010306	rhamnogalacturonan II biosynthetic process	8	1	0	1	2	1	0	1	1	1	0	1	0	1	1	1	0	1	0	1	0	1	0	1	0	1	0	1	0	1	0	1	0	1	0	1	0
BP	GO:0010310	regulation of hydrogen peroxide metabolic process	658	4.411e-14	130	1	57	4.62993e-07	62	1	28	1	5	1	0	1.7186e-18	112	1	44	2.33066e-14	87	1	37	1	2	1	1	2.18867e-14	90	1	35	2.85634e-08	51	1	18	1	0	1	0
BP	GO:0010311	lateral root formation	111	1	5	0.0753587	26	1	2	1	5	1	0	1	1	1	2	0.066916	22	1	6	1	11	1	0	1	0	1	1	0.172953	17	1	1	1	2	1	0	1	0
BP	GO:0010312	detoxification of zinc ion	1	1	0	1	0	1	0	1	0	1	0	1	0	1	0	1	0	1	0	1	0	1	0	1	0	1	0	1	0	1	0	1	0	1	0	1	0
BP	GO:0010315	auxin efflux	45	1	4	0.308822	11	0.567762	5	1	3	1	0	1	0	1	3	0.969798	7	1	3	1	2	1	0	1	0	1	3	1	5	1	2	1	1	1	0	1	0
BP	GO:0010321	regulation of vegetative phase change	10	1	1	1	0	1	0	1	0	1	0	1	0	0.923128	2	1	0	1	0	1	0	1	0	1	0	1	0	1	0	1	0	1	0	1	0	1	0
BP	GO:0010322	regulation of isopentenyl diphosphate biosynthetic process, methylerythritol 4-phosphate pathway	6	1	1	1	0	1	0	1	0	1	0	1	0	1	0	1	1	1	0	1	0	1	0	1	0	1	0	1	0	1	0	1	0	1	0	1	0
BP	GO:0010323	negative regulation of isopentenyl diphosphate biosynthetic process, methylerythritol 4-phosphate pathway	4	1	1	1	0	1	0	1	1	1	0	1	0	1	0	1	0	1	0	1	0	1	0	1	0	1	0	1	0	1	0	1	0	1	0	1	0
BP	GO:0010325	raffinose family oligosaccharide biosynthetic process	27	0.682669	5	1	1	0.413858	4	1	1	1	0	1	0	0.760394	4	1	2	0.546721	4	1	3	1	0	1	1	1	3	1	0	0.160599	4	1	1	1	0	1	0
BP	GO:0010332	response to gamma radiation	187	1	5	1	23	1	1	1	9	1	0	1	0	1	3	1	11	1	3	1	11	0.0841308	4	1	0	1	3	1	10	1	0	1	5	1	0	1	0
BP	GO:0010335	response to non-ionic osmotic stress	4	1	1	1	0	1	0	1	0	1	0	1	0	1	0	1	0	1	0	1	0	1	0	1	0	1	0	1	0	1	0	1	0	1	0	1	0
BP	GO:0010337	regulation of salicylic acid metabolic process	23	0.003463	9	1	2	0.00210932	7	1	0	1	0	1	0	3.76548e-06	11	1	0	0.00374742	7	1	0	1	0	1	0	0.000644941	8	1	0	0.00230415	6	1	0	1	0	1	0
BP	GO:0010338	leaf formation	16	1	0	0.80402	4	1	1	0.247602	4	1	0	1	0	1	0	1	3	1	1	0.375689	4	1	0	1	0	1	0	0.850511	3	1	0	0.0995286	4	1	0	1	0
BP	GO:0010342	endosperm cellularization	7	1	0	0.384016	3	1	0	0.622377	2	1	0	1	0	1	0	0.264978	3	1	0	0.716567	2	1	0	1	0	1	0	0.172953	3	1	0	0.39488	2	1	0	1	0
BP	GO:0010343	singlet oxygen-mediated programmed cell death	9	0.377063	3	1	0	1	0	1	0	1	0	1	0	0.849485	2	1	0	1	0	1	0	1	0	1	0	0.671845	2	1	0	1	0	1	0	1	0	1	0
BP	GO:0010344	seed oilbody biogenesis	3	1	0	1	0	1	0	1	0	1	0	1	0	1	0	1	0	1	0	1	0	1	0	1	0	1	0	1	0	1	0	1	0	1	0	1	0
BP	GO:0010345	suberin biosynthetic process	28	1	1	6.83406e-07	17	1	0	1.3456e-05	12	1	0	1	0	1	1	0.00012341	13	1	0	1.47346e-05	13	1	0	1	0	1	1	7.00374e-05	12	1	0	4.63005e-06	11	1	0	1	0
BP	GO:0010350	cellular response to magnesium starvation	8	1	1	1	1	1	1	1	1	1	0	1	0	1	0	1	1	1	1	1	0	1	0	1	0	1	0	1	1	1	1	1	0	1	0	1	0
BP	GO:0010351	lithium ion transport	105	0.742772	14	1	11	1	7	1	1	1	0	1	0	0.656843	11	1	7	1	8	1	2	1	0	1	0	0.486435	10	1	6	1	5	1	1	1	0	1	0
BP	GO:0010352	lithium ion export across the plasma membrane	2	1	0	1	0	1	0	1	0	1	0	1	0	1	0	1	0	1	0	1	0	1	0	1	0	1	0	1	0	1	0	1	0	1	0	1	0
BP	GO:0010353	response to trehalose	10	1	0	1	0	1	0	1	0	1	1	1	0	1	0	1	0	0.873634	2	1	0	1	0	1	0	1	0	1	0	1	0	1	0	1	0	1	0
BP	GO:0010358	leaf shaping	31	1	4	0.384016	8	0.567762	4	1	3	1	0	1	0	0.464323	5	0.358184	7	0.74402	4	1	4	1	0	1	0	0.671845	4	0.366556	6	1	2	1	2	1	0	1	0
BP	GO:0010359	regulation of anion channel activity	104	1	7	1	10	1	2	1	4	1	0	1	0	1	8	1	10	1	4	1	7	1	0	1	0	1	6	1	8	1	2	1	2	1	0	1	0
BP	GO:0010362	negative regulation of anion channel activity by blue light	9	1	0	0.617837	3	1	0	0.00536811	5	1	0	1	0	1	0	1	2	1	0	0.0831692	4	1	0	1	0	1	0	0.904099	2	1	0	0.550891	2	1	0	1	0
BP	GO:0010363	regulation of plant-type hypersensitive response	1394	3.86971e-17	237	1	146	0.00581487	87	1	73	1	9	1	5	5.72049e-13	168	1	134	9.44166e-12	135	1	103	1	4	1	2	2.15939e-10	136	1	96	0.0110973	63	1	51	1	0	1	1
BP	GO:0010364	regulation of ethylene biosynthetic process	11	1	0	1	1	1	0	1	0	1	0	1	0	1	0	1	1	1	0	1	0	1	0	1	0	1	0	1	0	1	0	1	0	1	0	1	0
BP	GO:0010366	negative regulation of ethylene biosynthetic process	14	1	1	0.621229	4	1	0	1	1	1	0	1	0	1	1	1	2	1	0	1	1	1	0	1	0	1	1	1	2	1	0	1	1	1	0	1	0
BP	GO:0010374	stomatal complex development	43	1	2	1	6	1	1	1	2	1	1	1	0	1	3	1	4	1	4	1	0	1	0	1	0	1	1	1	3	1	0	1	0	1	0	1	0
BP	GO:0010375	stomatal complex patterning	10	1	2	1	0	1	0	1	1	1	0	0.192287	2	1	0	1	0	1	0	1	0	1	0	1	0	1	0	1	0	1	0	1	0	1	0	1	0
BP	GO:0010376	stomatal complex formation	2	1	0	0.157942	2	1	0	0.802657	1	1	0	1	0	1	0	0.922643	1	1	0	0.836012	1	1	0	1	0	1	0	0.850511	1	1	0	0.665369	1	1	0	1	0
BP	GO:0010378	temperature compensation of the circadian clock	2	1	0	1	0	1	0	1	0	1	0	1	0	1	0	1	0	1	0	1	0	1	0	1	0	1	0	1	0	1	0	1	0	1	0	1	0
BP	GO:0010380	regulation of chlorophyll biosynthetic process	53	0.451115	9	1	4	1	2	1	2	1	1	1	1	0.119695	9	1	1	1	2	1	1	1	0	1	0	0.259656	7	1	1	1	1	1	1	1	0	1	0
BP	GO:0010381	peroxisome-chloroplast membrane tethering	4	1	1	1	0	1	0	1	0	1	0	1	0	1	1	1	0	1	0	1	0	1	0	1	0	1	0	1	0	1	0	1	0	1	0	1	0
BP	GO:0010387	COP9 signalosome assembly	17	1	0	1	0	1	0	1	0	1	0	1	0	1	0	1	0	1	1	1	0	1	0	1	0	1	0	1	0	1	0	1	0	1	0	1	0
BP	GO:0010389	regulation of G2/M transition of mitotic cell cycle	180	1	1	9.19821e-22	82	1	0	0.0341949	24	1	0	1	1	1	0	5.33526e-21	72	1	0	3.10375e-15	57	1	0	1	0	1	0	1.82327e-21	65	1	0	0.0265205	19	1	0	1	0
BP	GO:0010390	histone monoubiquitination	6	1	0	1	0	1	0	1	0	1	0	1	0	1	0	1	0	1	0	1	0	1	0	1	0	1	0	1	0	1	0	1	0	1	0	1	0
BP	GO:0010394	homogalacturonan metabolic process	4	1	0	0.51809	2	1	0	1	0	1	0	1	0	1	0	1	1	1	0	1	0	1	0	1	0	1	0	1	1	1	0	1	0	1	0	1	0
BP	GO:0010398	xylogalacturonan metabolic process	1	1	0	1	0	1	0	1	0	1	0	1	0	1	0	1	0	1	0	1	0	1	0	1	0	1	0	1	0	1	0	1	0	1	0	1	0
BP	GO:0010400	rhamnogalacturonan I side chain metabolic process	3	1	0	1	0	1	0	1	0	1	0	1	0	1	0	1	0	1	0	1	0	1	0	1	0	1	0	1	0	1	0	1	0	1	0	1	0
BP	GO:0010405	arabinogalactan protein metabolic process	5	1	0	0.688106	2	1	0	1	1	1	0	1	0	1	0	1	1	1	0	1	1	1	0	1	0	1	0	1	1	1	0	1	1	1	0	1	0
BP	GO:0010411	xyloglucan metabolic process	49	1	2	3.13815e-07	24	1	1	0.0125585	11	1	0	1	0	1	3	0.0794564	12	1	1	0.270172	9	1	0	1	1	1	1	0.0462797	11	1	1	0.0433033	8	1	0	1	0
BP	GO:0010413	glucuronoxylan metabolic process	515	1	16	1.76965e-06	119	1	8	1.08903e-12	89	1	1	1	0	1	17	0.0473112	78	1	11	0.000207649	78	1	0	1	0	1	10	0.0191949	67	1	4	1.06969e-07	60	1	0	1	0
BP	GO:0010417	glucuronoxylan biosynthetic process	45	1	1	0.0386779	14	1	0	0.00168811	12	1	0	1	2	1	2	1	4	1	1	0.182824	9	1	0	1	0	1	0	1	4	1	0	0.0278813	8	1	0	1	0
BP	GO:0010421	hydrogen peroxide-mediated programmed cell death	7	1	0	0.982512	2	1	0	1	0	1	0	1	0	1	0	1	1	1	1	1	0	1	0	1	0	1	0	1	1	1	0	1	0	1	0	1	0
BP	GO:0010422	regulation of brassinosteroid biosynthetic process	4	1	0	1	1	1	0	0.0261589	3	1	1	1	0	1	0	1	1	1	0	0.00193128	4	1	0	1	0	1	0	1	1	1	0	0.0124881	3	1	0	1	0
BP	GO:0010423	negative regulation of brassinosteroid biosynthetic process	2	1	0	0.157942	2	1	0	0.802657	1	1	0	1	0	1	0	0.11967	2	1	0	0.836012	1	1	0	1	0	1	0	0.0902099	2	1	0	0.665369	1	1	0	1	0
BP	GO:0010424	DNA methylation on cytosine within a CG sequence	5	1	0	0.688106	2	1	0	1	0	1	0	1	0	1	0	1	1	1	0	1	1	1	0	1	0	1	0	1	1	1	0	1	0	1	0	1	0
BP	GO:0010426	DNA methylation on cytosine within a CHH sequence	2	1	0	1	0	1	0	1	0	1	0	1	0	1	0	1	0	1	0	1	0	1	0	1	0	1	0	1	0	1	0	1	0	1	0	1	0
BP	GO:0010430	fatty acid omega-oxidation	2	1	0	0.982512	1	1	0	1	0	1	0	1	0	1	0	0.11967	2	1	0	1	0	1	0	1	0	1	0	0.850511	1	1	0	1	0	1	0	1	0
BP	GO:0010431	seed maturation	152	1	8	1	11	1	3	1	4	1	0	1	4	1	3	1	7	1	5	1	6	1	0	1	1	1	3	1	6	1	2	1	1	1	0	1	0
BP	GO:0010432	bract development	1	1	0	0.674201	1	1	0	1	0	1	0	1	0	1	0	0.622621	1	1	0	1	0	1	0	1	0	1	0	0.553159	1	1	0	1	0	1	0	1	0
BP	GO:0010434	bract formation	4	1	0	0.51809	2	1	0	0.273715	2	1	0	1	0	1	0	1	1	1	0	0.337837	2	1	0	1	0	1	0	1	1	1	0	0.164787	2	1	0	1	0
BP	GO:0010438	cellular response to sulfur starvation	21	1	3	0.170399	7	1	0	3.55718e-05	10	1	1	1	0	1	2	0.19876	6	1	0	0.000193102	10	1	1	1	0	1	1	0.271727	5	1	0	0.000190701	8	1	0	1	0
BP	GO:0010439	regulation of glucosinolate biosynthetic process	26	1	3	0.0844685	9	1	0	0.000266074	10	1	1	1	0	1	2	0.00678388	10	1	1	5.70663e-06	13	1	1	1	0	1	2	0.0783133	7	1	0	0.000921969	8	1	0	1	0
BP	GO:0010440	stomatal lineage progression	170	1	13	0.0380261	38	1	1	0.29006	19	1	0	1	0	1	5	0.409995	26	1	4	0.00749097	30	1	0	1	1	1	5	0.235509	23	1	1	0.205088	15	1	0	1	0
BP	GO:0010442	guard cell morphogenesis	11	1	0	0.123963	5	1	0	1	0	1	0	1	0	1	0	1	0	1	1	1	1	1	0	1	0	1	0	1	0	1	0	1	0	1	0	1	0
BP	GO:0010444	guard mother cell differentiation	8	1	0	1	1	1	0	1	0	1	0	1	0	1	0	1	0	1	0	1	0	1	0	1	0	1	0	1	0	1	0	1	0	1	0	1	0
BP	GO:0010447	response to acidic pH	7	1	1	0.384016	3	1	0	0.622377	2	1	0	1	0	1	0	0.264978	3	1	0	0.191767	3	1	0	1	0	1	0	0.172953	3	1	0	0.39488	2	1	0	1	0
BP	GO:0010449	root meristem growth	16	1	1	1	3	1	0	0.71913	3	1	0	1	1	1	1	1	2	1	0	0.836012	3	1	0	1	0	1	1	1	2	1	0	0.37699	3	1	0	1	0
BP	GO:0010450	inflorescence meristem growth	4	1	0	1	0	1	0	1	0	1	0	1	0	1	0	1	0	1	0	1	0	1	0	1	0	1	0	1	0	1	0	1	0	1	0	1	0
BP	GO:0010451	floral meristem growth	1	1	0	0.674201	1	1	0	1	0	1	0	1	0	1	0	0.622621	1	1	0	1	0	1	0	1	0	1	0	0.553159	1	1	0	1	0	1	0	1	0
BP	GO:0010452	histone H3-K36 methylation	9	1	2	1	0	1	1	1	0	1	0	1	0	0.849485	2	1	0	0.782111	2	1	0	1	0	1	0	0.671845	2	1	0	1	1	1	0	1	0	1	0
BP	GO:0010455	positive regulation of cell fate commitment	6	1	0	1	0	1	0	1	0	1	0	1	0	1	0	1	1	1	0	1	1	1	0	1	0	1	0	1	0	1	0	1	0	1	0	1	0
BP	GO:0010468	regulation of gene expression	103	1	8	1	14	1	5	1	2	1	0	1	1	1	5	1	10	1	3	1	9	1	0	1	0	1	4	1	7	1	3	1	1	1	0	1	0
BP	GO:0010476	gibberellin mediated signaling pathway	18	0.231159	5	1	0	0.153246	4	1	0	1	0	0.0449215	3	0.289779	4	1	0	0.209022	4	1	0	1	0	0.0570159	3	0.596433	3	1	0	0.0518511	4	1	0	1	0	0.0669997	2
BP	GO:0010477	response to sulfur dioxide	5	1	0	1	0	1	0	1	0	1	0	1	0	1	0	1	0	1	0	1	0	1	0	1	1	1	0	1	0	1	0	1	0	1	0	1	0
BP	GO:0010478	chlororespiration	4	1	0	1	0	1	0	1	0	1	0	1	0	1	0	1	0	1	0	1	0	1	0	1	0	1	0	1	0	1	0	1	0	1	0	1	0
BP	GO:0010479	stele development	5	1	0	0.688106	2	1	0	1	0	1	0	1	0	1	0	1	1	1	0	0.470499	2	1	0	1	0	1	0	1	1	1	0	1	0	1	0	1	0
BP	GO:0010480	microsporocyte differentiation	4	1	0	0.51809	2	1	0	1	0	1	0	1	0	1	0	0.409995	2	1	0	1	1	1	0	1	0	1	0	0.305813	2	1	0	1	0	1	0	1	0
BP	GO:0010482	regulation of epidermal cell division	5	1	0	1	1	1	0	1	0	1	0	1	0	1	0	1	1	1	0	1	0	1	0	1	0	1	0	1	1	1	0	1	0	1	0	1	0
BP	GO:0010483	pollen tube reception	8	1	0	1	1	1	0	1	0	1	0	1	0	1	0	1	0	1	1	1	0	1	0	1	0	1	0	1	0	1	0	1	0	1	0	1	0
BP	GO:0010492	maintenance of shoot apical meristem identity	43	1	6	1	7	0.494687	5	1	0	1	0	1	0	1	4	0.922643	7	1	1	0.324756	8	1	0	1	0	1	2	0.52607	7	1	1	1	0	1	0	1	0
BP	GO:0010493	Lewis a epitope biosynthetic process	5	1	0	0.688106	2	1	0	0.381142	2	1	0	1	0	1	0	0.574338	2	1	0	0.470499	2	1	0	1	0	1	0	0.438873	2	1	0	0.230446	2	1	0	1	0
BP	GO:0010495	long-distance posttranscriptional gene silencing	5	1	0	1	1	1	0	1	0	1	0	1	0	1	0	1	0	1	0	1	0	1	0	1	0	1	0	1	0	1	0	1	0	1	0	1	0
BP	GO:0010496	intercellular transport	5	1	0	1	0	1	0	1	0	1	0	1	0	1	0	1	0	1	0	1	0	1	0	1	0	1	0	1	0	1	0	1	0	1	0	1	0
BP	GO:0010497	plasmodesmata-mediated intercellular transport	22	1	1	0.0907848	8	1	0	0.191713	5	1	0	1	0	1	1	0.241064	6	1	0	0.337863	5	1	0	1	0	1	1	0.112529	6	1	0	0.665369	3	1	0	1	0
BP	GO:0010498	proteasomal protein catabolic process	335	1	32	1	45	0.176763	24	1	18	1	0	1	1	0.317291	31	1	28	0.111431	28	1	16	1	0	1	2	0.157486	28	1	26	0.0533368	20	1	7	1	0	1	0
BP	GO:0010500	transmitting tissue development	2	1	0	1	0	1	0	1	0	1	0	1	0	1	0	0.11967	2	1	0	0.0982751	2	1	0	1	0	1	0	1	0	1	0	1	0	1	0	1	0
BP	GO:0010501	RNA secondary structure unwinding	10	0.464902	3	1	1	0.176763	3	1	0	1	0	1	0	0.923128	2	1	2	0.219356	3	1	0	1	0	1	0	0.7427	2	1	1	0.0784506	3	1	0	1	0	1	0
BP	GO:0010507	negative regulation of autophagy	11	1	0	1	1	1	0	1	0	1	0	1	0	1	0	1	0	1	0	1	0	1	0	1	0	1	0	1	0	1	0	1	0	1	0	1	0
BP	GO:0010508	positive regulation of autophagy	8	0.298573	3	1	0	1	0	1	0	1	0	1	0	0.191058	3	1	0	0.133309	3	1	0	1	0	1	0	0.582956	2	1	0	1	0	1	0	1	0	1	0
BP	GO:0010529	negative regulation of transposition	5	1	0	1	0	1	0	1	0	1	0	1	0	1	0	1	0	1	0	1	0	1	0	1	0	1	0	1	0	1	0	1	0	1	0	1	0
BP	GO:0010540	basipetal auxin transport	69	1	3	0.0784533	18	1	3	0.110654	11	1	0	1	0	1	1	0.0955059	15	1	2	0.836012	9	1	0	1	0	1	1	0.305813	11	1	0	0.443794	7	1	0	1	0
BP	GO:0010541	acropetal auxin transport	41	1	1	0.184492	11	1	3	0.249633	7	1	0	1	0	1	0	0.122648	10	1	1	1	4	1	0	1	0	1	0	0.438873	7	1	0	1	3	1	0	1	0
BP	GO:0010555	response to mannitol	36	0.001952	12	1	3	0.111484	6	1	2	1	0	1	0	0.295048	6	1	3	0.169769	6	1	1	1	0	1	0	0.161897	6	1	3	0.0994204	5	1	1	1	0	1	0
BP	GO:0010564	regulation of cell cycle process	159	1	3	1	18	1	1	1	2	1	0	1	4	1	2	1	8	1	1	1	5	1	0	1	1	1	1	1	8	1	0	1	1	1	0	1	0
BP	GO:0010581	regulation of starch biosynthetic process	15	1	2	1	0	1	1	1	0	1	0	1	0	1	2	1	0	1	1	1	0	1	0	1	0	1	2	1	0	1	1	1	0	1	0	1	0
BP	GO:0010582	floral meristem determinacy	27	1	0	0.215105	8	1	0	1	3	1	1	1	1	1	0	0.45618	6	1	0	0.582852	5	1	0	1	0	1	0	0.238384	6	1	0	0.893773	3	1	0	1	0
BP	GO:0010583	response to cyclopentenone	462	0.973113	50	0.0011655	97	1	19	0.00529331	54	1	1	1	1	0.286128	41	0.00378564	78	1	24	0.00270292	67	0.739971	4	1	1	0.900076	30	0.032702	60	1	12	0.0244494	38	1	0	1	0
BP	GO:0010584	pollen exine formation	61	1	3	1	8	1	3	0.802657	7	1	0	1	0	1	3	1	8	1	3	1	4	1	0	1	0	1	2	1	5	1	1	1	4	1	0	1	0
BP	GO:0010585	glutamine secretion	3	0.0162871	3	1	0	0.138622	2	1	0	1	0	1	0	0.00881401	3	1	0	0.00511703	3	1	0	1	0	1	0	0.00562184	3	1	0	0.0784506	2	1	0	1	0	1	0
BP	GO:0010586	miRNA metabolic process	3	1	0	1	0	1	0	1	0	1	0	1	0	1	0	1	0	1	0	1	0	1	0	1	0	1	0	1	0	1	0	1	0	1	0	1	0
BP	GO:0010587	miRNA catabolic process	18	1	0	0.982512	4	1	0	1	0	1	0	1	0	1	0	0.317388	5	1	1	1	3	1	0	1	0	1	0	0.451589	4	1	0	1	0	1	0	1	0
BP	GO:0010588	cotyledon vascular tissue pattern formation	50	1	3	0.00654941	17	1	1	1	5	1	1	1	1	1	2	0.000589046	17	1	0	1	5	1	0	1	0	1	2	0.00721208	13	1	0	1	3	1	0	1	0
BP	GO:0010589	leaf proximal/distal pattern formation	13	1	1	1	1	1	0	1	1	1	0	1	0	1	1	1	1	1	0	1	1	1	0	1	0	1	1	1	1	1	0	1	1	1	0	1	0
BP	GO:0010597	green leaf volatile biosynthetic process	3	0.249256	2	1	0	1	0	1	0	1	0	1	0	1	1	1	0	0.160741	2	1	0	1	0	1	0	0.99561	1	1	0	1	0	1	0	1	0	1	0
BP	GO:0010599	production of lsiRNA involved in RNA interference	9	1	1	1	0	1	1	1	0	1	0	1	0	1	1	1	0	1	1	1	0	1	0	1	0	1	1	1	0	1	1	1	0	1	0	1	0
BP	GO:0010600	regulation of auxin biosynthetic process	12	0.22207	4	1	0	0.0488847	4	1	0	1	0	1	0	1	1	1	1	0.0648875	4	1	0	1	0	1	0	1	1	1	0	0.0143966	4	1	0	1	0	1	0
BP	GO:0010602	regulation of 1-aminocyclopropane-1-carboxylate metabolic process	6	0.15562	3	1	1	1	1	1	0	1	0	1	0	0.00787985	4	1	0	1	1	1	0	1	0	1	0	0.0630082	3	1	0	1	0	1	0	1	0	1	0
BP	GO:0010606	positive regulation of cytoplasmic mRNA processing body assembly	4	1	0	1	0	1	0	1	0	1	0	1	0	1	0	1	0	1	0	1	0	1	0	1	0	1	0	1	0	1	0	1	0	1	0	1	0
BP	GO:0010608	posttranscriptional regulation of gene expression	6	0.679037	2	1	0	1	1	1	0	1	0	1	0	1	1	1	0	1	1	1	0	1	0	1	0	1	1	1	0	1	0	1	0	1	0	1	0
BP	GO:0010617	circadian regulation of calcium ion oscillation	9	1	1	1	1	1	1	1	1	1	0	1	0	1	0	1	1	1	0	1	1	1	0	1	0	1	0	1	1	1	0	1	1	1	0	1	0
BP	GO:0010618	aerenchyma formation	17	1	3	1	2	1	1	1	1	1	1	1	0	0.268236	4	1	1	1	1	1	1	1	0	1	0	0.545438	3	1	0	1	0	1	1	1	0	1	0
BP	GO:0010623	programmed cell death involved in cell development	17	0.520398	4	1	1	0.494687	3	1	1	1	1	1	0	0.268236	4	1	0	1	1	1	1	1	0	1	0	0.162556	4	1	0	1	1	1	0	1	0	1	0
BP	GO:0010628	positive regulation of gene expression	22	0.875624	4	1	2	1	2	1	0	1	0	1	1	1	3	1	2	1	2	1	0	1	0	1	0	0.784116	3	1	2	1	2	1	0	1	0	1	0
BP	GO:0010629	negative regulation of gene expression	11	3.83705e-05	8	1	0	0.209999	3	1	0	1	0	1	0	1	1	1	0	0.0479056	4	1	0	1	0	1	0	1	1	1	0	0.0975769	3	1	0	1	0	1	0
BP	GO:0010638	positive regulation of organelle organization	169	1	5	1	13	1	2	1	5	1	0	1	0	1	4	1	10	1	3	1	9	1	0	1	0	1	4	1	9	1	1	1	4	1	0	1	0
BP	GO:0010647	positive regulation of cell communication	2	0.979073	1	1	0	1	0	1	0	1	0	1	0	0.898895	1	1	0	1	0	1	0	1	0	1	0	0.772216	1	1	0	1	0	1	0	1	0	1	0
BP	GO:0010729	positive regulation of hydrogen peroxide biosynthetic process	6	0.0190571	4	1	0	1	1	1	0	1	0	1	0	0.489154	2	1	0	1	1	1	0	1	0	1	0	0.401476	2	1	0	1	1	1	0	1	0	1	0
BP	GO:0010730	negative regulation of hydrogen peroxide biosynthetic process	1	1	0	1	0	1	0	1	0	0.882847	1	1	0	1	0	1	0	1	0	0.576733	1	1	0	1	0	1	0	1	0	1	0	1	0	1	0	1	0
BP	GO:0010731	protein glutathionylation	8	1	0	1	0	1	0	1	0	1	0	1	0	1	1	1	0	1	0	0.830673	2	1	0	1	0	1	0	1	0	1	0	1	0	1	0	1	0
BP	GO:0010817	regulation of hormone levels	286	1	5	3.95453e-24	114	1	3	0.000462658	41	1	0	1	1	1	5	4.50364e-12	78	1	4	5.06094e-05	52	1	0	1	1	1	4	1.32848e-12	69	1	1	0.000100844	34	1	0	1	0
BP	GO:0010928	regulation of auxin mediated signaling pathway	16	1	0	1	1	1	0	1	0	1	0	1	0	1	0	1	2	1	0	1	1	1	0	1	0	1	0	1	1	1	0	1	0	1	0	1	0
BP	GO:0010941	regulation of cell death	2	0.11299	2	1	0	0.0674364	2	1	0	1	0	1	0	1	0	1	0	0.0674776	2	1	0	1	0	1	0	1	0	1	0	0.0347391	2	1	0	1	0	1	0
BP	GO:0010942	positive regulation of cell death	26	1	1	1	2	1	1	1	1	1	1	1	0	1	1	1	2	1	3	1	1	1	0	1	0	1	1	1	1	1	1	1	1	1	0	1	0
BP	GO:0010951	negative regulation of endopeptidase activity	13	1	2	1	3	1	1	1	0	1	0	1	0	1	1	1	2	1	2	1	0	1	0	1	0	1	1	1	2	1	1	1	0	1	0	1	0
BP	GO:0010971	positive regulation of G2/M transition of mitotic cell cycle	12	1	0	1	0	1	0	1	0	1	0	1	0	1	0	1	0	1	0	1	0	1	0	1	0	1	0	1	0	1	0	1	0	1	0	1	0
BP	GO:0012501	programmed cell death	59	0.220983	11	1	9	1	1	0.236671	9	1	0	1	2	1	4	0.922643	9	0.782111	6	0.0147832	14	1	0	1	0	1	3	1	6	1	0	0.0404298	9	1	0	1	0
BP	GO:0012502	induction of programmed cell death	2	1	0	1	0	1	0	1	0	1	0	1	0	1	0	1	0	1	0	1	0	1	0	1	0	1	0	1	0	1	0	1	0	1	0	1	0
BP	GO:0015031	protein transport	96	1	4	1	4	1	2	1	2	1	0	1	1	1	4	1	2	1	1	1	6	1	0	1	0	1	2	1	2	1	1	1	2	1	0	1	0
BP	GO:0015074	DNA integration	7	1	0	1	0	1	0	1	0	1	0	1	0	1	0	1	0	1	0	1	0	1	0	1	0	1	0	1	0	1	0	1	0	1	0	1	0
BP	GO:0015670	carbon dioxide transport	9	1	0	1	0	1	0	1	0	1	0	1	0	1	0	1	0	1	0	1	1	1	0	1	1	1	0	1	0	1	0	1	0	1	0	1	0
BP	GO:0015671	oxygen transport	3	0.249256	2	1	0	0.138622	2	1	0	1	0	1	0	0.191058	2	1	0	0.160741	2	1	0	1	0	1	0	0.142793	2	1	0	0.0784506	2	1	0	1	0	1	0
BP	GO:0015675	nickel cation transport	14	1	0	0.00424668	8	1	0	0.557334	3	1	0	1	0	1	0	1	2	1	0	0.000284338	8	1	0	1	0	1	0	1	1	1	0	0.910268	2	1	0	1	0
BP	GO:0015680	protein maturation by copper ion transfer	8	0.973113	2	1	0	1	0	1	0	1	0	1	0	0.74504	2	1	0	1	0	1	0	0.0299093	2	1	0	1	0	1	0	1	0	1	0	1	0	1	0
BP	GO:0015688	iron chelate transport	5	1	0	0.170437	3	1	0	1	1	1	0	1	0	1	0	1	0	1	0	0.00744966	4	1	0	1	0	1	0	1	0	1	0	1	1	1	0	1	0
BP	GO:0015689	molybdate ion transport	6	1	0	0.000207689	6	1	0	0.082393	3	1	0	1	0	1	0	0.695989	2	1	0	1	1	1	0	1	0	1	0	0.554927	2	1	0	1	1	1	0	1	0
BP	GO:0015690	aluminum cation transport	2	0.11299	2	1	0	1	0	1	0	1	0	1	0	1	0	1	0	0.926819	1	1	0	1	0	1	0	1	0	1	0	1	0	1	0	1	0	1	0
BP	GO:0015691	cadmium ion transport	32	1	2	0.0437473	11	1	0	0.082393	7	1	0	1	0	1	1	1	5	1	0	0.000410231	12	1	0	1	0	1	1	0.823381	5	1	0	0.0191937	7	1	0	1	0
BP	GO:0015692	lead ion transport	10	1	0	0.717693	3	1	0	0.00894345	5	1	0	1	0	1	0	0.550424	3	1	0	0.0201573	5	1	0	1	0	1	0	0.366556	3	1	0	0.00198607	5	1	0	1	0
BP	GO:0015693	magnesium ion transport	5	1	0	1	0	1	0	0.381142	2	1	0	1	0	1	0	1	0	1	0	1	1	1	0	1	0	1	0	1	0	1	0	1	0	1	0	1	0
BP	GO:0015695	organic cation transport	16	1	2	1	0	1	0	1	0	1	0	1	0	1	1	1	1	0.00348156	6	1	0	1	0	1	0	1	1	1	0	1	0	1	0	1	0	1	0
BP	GO:0015696	ammonium transport	127	1	10	1	13	1	2	1	4	1	0	1	2	1	7	1	10	1	9	1	0	1	0	1	0	1	6	1	7	1	2	1	0	1	0	1	0
BP	GO:0015698	inorganic anion transport	27	1	0	0.781048	6	1	0	0.349104	5	1	0	1	2	1	0	0.858095	5	1	0	1	2	1	0	1	0	1	0	0.539651	5	1	0	1	2	1	0	1	0
BP	GO:0015700	arsenite transport	24	1	0	1	2	1	1	1	0	1	0	1	0	1	1	1	0	1	1	1	0	1	0	1	0	1	0	1	0	1	1	1	0	1	0	1	0
BP	GO:0015706	nitrate transport	645	1	62	9.62364e-27	203	1	21	2.57026e-20	121	1	3	1	9	1	47	1.43967e-24	170	0.671987	41	2.37728e-15	129	1	0	1	0	1	39	4.19616e-21	140	1	20	5.67561e-08	71	1	0	1	0
BP	GO:0015712	hexose phosphate transport	5	1	0	0.170437	3	1	0	1	1	1	0	1	0	1	0	0.01388	4	1	0	0.0868169	3	1	0	1	0	1	0	0.0769388	3	1	0	1	1	1	0	1	0
BP	GO:0015713	phosphoglycerate transmembrane transport	20	1	1	0.687154	5	1	0	1	2	1	0	1	0	1	0	0.164989	6	1	0	0.0932476	6	1	0	1	0	1	0	0.235509	5	1	0	1	2	1	0	1	0
BP	GO:0015714	phosphoenolpyruvate transport	13	1	0	1	3	1	0	1	2	1	0	1	0	1	0	0.34977	4	1	0	0.228616	4	1	0	1	0	1	0	0.602371	3	1	0	0.852205	2	1	0	1	0
BP	GO:0015717	triose phosphate transport	5	1	1	1	0	1	0	1	0	1	0	1	0	1	0	1	0	1	0	1	0	1	0	1	0	1	0	1	0	1	0	1	0	1	0	1	0
BP	GO:0015720	allantoin transport	6	1	0	0.273916	3	1	0	0.082393	3	1	0	1	0	1	1	0.180359	3	1	0	0.582852	2	1	0	1	0	1	0	0.117432	3	1	0	0.303667	2	1	0	1	0
BP	GO:0015727	lactate transport	4	0.00216948	4	1	0	0.000292203	4	1	0	1	0	1	0	0.000775042	4	1	0	0.000399479	4	1	0	1	0	1	0	0.000386214	4	1	0	6.9705e-05	4	1	0	1	0	1	0
BP	GO:0015729	oxaloacetate transport	6	1	0	1	1	1	0	1	1	1	0	1	0	1	0	1	1	1	0	1	1	1	0	1	0	1	0	1	1	1	0	1	1	1	0	1	0
BP	GO:0015739	sialic acid transport	2	1	0	0.982512	1	1	0	1	0	1	0	1	0	1	0	1	0	1	0	1	0	1	0	1	0	1	0	1	0	1	0	1	0	1	0	1	0
BP	GO:0015742	alpha-ketoglutarate transport	2	1	0	0.982512	1	1	0	0.802657	1	1	0	1	0	1	0	0.922643	1	1	0	0.836012	1	1	0	1	0	1	0	0.850511	1	1	0	0.665369	1	1	0	1	0
BP	GO:0015743	malate transport	15	0.122974	5	1	1	1	1	1	1	1	0	1	0	1	0	1	1	1	0	1	2	1	0	1	0	1	0	1	1	1	0	1	1	1	0	1	0
BP	GO:0015744	succinate transport	2	1	0	0.982512	1	1	0	0.802657	1	1	0	0.763573	1	1	0	0.922643	1	1	0	0.836012	1	1	0	1	0	1	0	0.850511	1	1	0	0.665369	1	1	0	1	0
BP	GO:0015749	monosaccharide transmembrane transport	17	0.0111921	7	1	1	1	2	0.767209	3	1	0	1	0	0.0848316	5	1	0	0.61728	3	1	1	1	0	1	0	0.0415666	5	1	0	1	1	1	1	1	0	1	0
BP	GO:0015755	fructose transmembrane transport	8	0.973113	2	1	1	1	0	1	0	1	0	1	0	1	0	1	0	1	0	1	0	1	0	1	0	1	0	1	0	1	0	1	0	1	0	1	0
BP	GO:0015760	glucose-6-phosphate transport	9	1	0	0.617837	3	1	0	1	1	1	0	1	0	1	0	0.11967	4	1	0	0.337837	3	1	0	1	0	1	0	0.305813	3	1	0	1	1	1	0	1	0
BP	GO:0015770	sucrose transport	26	1	0	0.0844685	9	1	0	1	2	1	1	1	0	1	0	0.0237061	9	1	0	1	1	1	0	1	0	1	0	0.487639	5	1	0	1	1	1	0	1	0
BP	GO:0015774	polysaccharide transport	12	1	1	1	2	1	0	1	1	1	0	1	0	1	1	1	0	1	0	1	0	1	0	1	0	1	1	1	0	1	0	1	0	1	0	1	0
BP	GO:0015780	nucleotide-sugar transmembrane transport	31	1	2	1	4	1	0	1	0	1	0	1	0	1	2	1	1	1	0	1	0	1	0	1	0	1	2	1	1	1	0	1	0	1	0	1	0
BP	GO:0015783	GDP-fucose transmembrane transport	7	0.818436	2	1	1	1	0	1	0	1	1	1	0	0.609835	2	1	1	1	1	1	0	1	0	1	0	0.486435	2	1	1	1	0	1	0	1	0	1	0
BP	GO:0015786	UDP-glucose transmembrane transport	9	1	2	0.617837	3	1	0	0.802657	2	1	1	1	0	0.849485	2	0.436063	3	1	1	0.912388	2	1	0	1	0	0.671845	2	0.305813	3	1	0	0.550891	2	1	0	1	0
BP	GO:0015791	polyol transport	2	1	0	1	0	1	0	1	0	1	0	1	0	1	0	1	0	1	0	1	0	1	0	1	0	1	0	1	0	1	0	1	0	1	0	1	0
BP	GO:0015794	glycerol-3-phosphate transmembrane transport	2	1	0	1	0	1	0	1	0	1	0	1	0	1	0	1	0	1	0	1	0	1	0	1	0	1	0	1	0	1	0	1	0	1	0	1	0
BP	GO:0015798	myo-inositol transport	6	1	0	0.273916	3	1	0	0.00894345	4	1	0	1	0	1	0	0.695989	2	1	0	0.0179159	4	1	0	1	0	1	0	1	1	1	0	0.0404298	3	1	0	1	0
BP	GO:0015800	acidic amino acid transport	4	1	1	1	0	1	0	1	0	1	0	1	0	1	0	1	0	1	0	1	0	1	0	1	0	1	0	1	0	1	0	1	0	1	0	1	0
BP	GO:0015802	basic amino acid transport	124	1	10	1	16	1	3	1	4	1	0	1	2	1	7	1	10	1	9	1	0	1	0	1	0	1	6	1	7	1	3	1	0	1	0	1	0
BP	GO:0015804	neutral amino acid transport	10	1	1	1	2	1	0	0.877708	2	1	0	1	0	1	0	1	0	1	0	0.395392	3	1	0	1	0	1	0	1	0	1	0	1	1	1	0	1	0
BP	GO:0015805	S-adenosyl-L-methionine transport	2	1	0	1	0	1	0	1	0	1	0	1	0	1	0	1	0	1	0	1	0	1	0	1	0	1	0	1	0	1	0	1	0	1	0	1	0
BP	GO:0015809	arginine transport	4	1	0	0.102204	3	1	1	1	0	1	0	1	0	1	0	1	0	1	1	1	0	1	0	1	0	1	0	1	0	1	1	1	0	1	0	1	0
BP	GO:0015810	aspartate transmembrane transport	2	1	0	0.157942	2	1	0	0.0743321	2	1	0	1	0	1	0	0.11967	2	1	0	0.0982751	2	1	0	1	0	1	0	0.0902099	2	1	0	0.0433033	2	1	0	1	0
BP	GO:0015812	gamma-aminobutyric acid transport	7	1	1	1	0	1	0	1	0	1	0	1	1	1	1	1	1	1	0	1	0	1	0	1	0	1	0	1	0	1	0	1	0	1	0	1	0
BP	GO:0015813	L-glutamate transmembrane transport	4	1	0	1	0	1	0	1	0	1	0	1	0	1	0	1	0	1	0	1	0	1	0	1	0	1	0	1	0	1	0	1	0	1	0	1	0
BP	GO:0015822	ornithine transport	6	1	0	0.273916	3	1	0	0.499996	2	1	0	1	0	1	0	0.0305975	4	1	0	0.129114	3	1	0	1	0	1	0	0.117432	3	1	0	0.303667	2	1	0	1	0
BP	GO:0015824	proline transport	230	1	22	0.151507	45	1	9	0.0524224	28	1	0	1	1	1	13	0.274796	35	1	9	0.0318679	35	1	1	1	0	1	9	0.852691	25	1	7	0.0690798	21	1	0	1	0
BP	GO:0015827	tryptophan transport	2	1	0	0.157942	2	1	0	0.0743321	2	1	0	1	0	1	0	0.11967	2	1	0	0.0982751	2	1	0	1	0	1	0	0.0902099	2	1	0	0.0433033	2	1	0	1	0
BP	GO:0015833	peptide transport	5	0.54172	2	1	1	1	1	1	0	1	0	1	0	0.380712	2	1	0	1	1	1	0	1	0	1	0	0.30709	2	1	0	1	0	1	0	1	0	1	0
BP	GO:0015840	urea transport	11	1	0	0.000442398	8	1	0	0.00154903	6	1	0	1	0	1	0	0.00012037	8	1	0	0.00455146	6	1	0	1	0	1	0	2.13834e-05	8	1	0	0.000261176	6	1	0	1	0
BP	GO:0015843	methylammonium transport	2	1	0	1	0	1	0	1	0	1	0	1	0	1	0	1	0	1	0	1	0	1	0	1	0	1	0	1	0	1	0	1	0	1	0	1	0
BP	GO:0015846	polyamine transport	10	1	0	0.717693	3	1	0	0.877708	2	1	0	1	0	1	0	1	2	1	0	1	1	1	0	1	0	1	0	1	2	1	0	1	1	1	0	1	0
BP	GO:0015850	organic hydroxy compound transport	3	1	0	0.0378476	3	1	0	1	0	1	0	1	0	1	0	0.0237061	3	1	0	1	0	1	0	1	0	1	0	0.0135533	3	1	0	1	0	1	0	1	0
BP	GO:0015853	adenine transport	2	1	0	0.157942	2	1	0	1	0	1	0	1	0	1	0	1	0	1	0	1	0	1	0	1	0	1	0	1	0	1	0	1	0	1	0	1	0
BP	GO:0015854	guanine transport	2	1	0	0.157942	2	1	0	1	0	1	0	1	0	1	0	1	0	1	0	1	0	1	0	1	0	1	0	1	0	1	0	1	0	1	0	1	0
BP	GO:0015857	uracil transport	2	1	0	1	0	1	0	1	0	1	0	1	0	1	0	1	0	1	0	1	0	1	0	1	0	1	0	1	0	1	0	1	0	1	0	1	0
BP	GO:0015858	nucleoside transport	6	1	0	0.845832	2	1	0	0.499996	2	1	0	1	0	1	0	0.695989	2	1	0	0.582852	2	1	0	1	0	1	0	0.554927	2	1	0	0.303667	2	1	0	1	0
BP	GO:0015864	pyrimidine nucleoside transport	4	1	0	0.51809	2	1	0	0.273715	2	1	0	1	0	1	0	0.409995	2	1	0	0.337837	2	1	0	1	0	1	0	0.305813	2	1	0	0.164787	2	1	0	1	0
BP	GO:0015865	purine nucleotide transport	7	1	0	1	1	1	0	1	0	1	0	1	0	1	0	1	0	1	0	1	0	1	0	1	0	1	0	1	0	1	0	1	0	1	0	1	0
BP	GO:0015866	ADP transport	14	0.326781	4	1	0	1	2	1	1	1	0	1	0	0.177967	4	1	0	1	1	1	0	1	0	1	0	0.104643	4	1	0	1	1	1	0	1	0	1	0
BP	GO:0015867	ATP transport	21	0.133106	6	1	2	0.711533	3	0.993351	3	1	0	1	0	0.167053	5	1	2	1	2	1	2	1	0	1	0	0.0854306	5	1	2	1	2	1	2	1	0	1	0
BP	GO:0015884	folic acid transport	4	1	0	1	0	1	0	1	0	1	0	1	0	1	0	1	0	1	0	1	0	1	0	1	0	1	0	1	0	1	0	1	0	1	0	1	0
BP	GO:0015908	fatty acid transport	9	0.0982038	4	0.617837	3	1	0	1	0	1	0	1	0	0.240496	3	0.436063	3	1	0	1	0	1	0	1	0	0.156881	3	0.904099	2	1	0	1	0	1	0	1	0
BP	GO:0015914	phospholipid transport	4	0.377063	2	1	0	1	0	1	0	1	0	1	0	1	1	1	0	1	0	1	0	1	0	1	0	1	1	1	0	1	0	1	0	1	0	1	0
BP	GO:0015916	fatty-acyl-CoA transport	3	1	0	1	1	1	0	1	1	1	0	1	0	1	0	1	1	1	0	1	1	1	0	1	0	1	0	1	1	1	0	0.887595	1	1	0	1	0
BP	GO:0015937	coenzyme A biosynthetic process	17	1	0	1	2	1	1	1	2	1	0	1	0	1	0	1	2	1	1	1	1	1	0	1	0	1	0	1	2	1	1	1	1	1	0	1	0
BP	GO:0015940	pantothenate biosynthetic process	5	1	0	1	0	1	0	1	1	1	0	1	0	1	0	1	1	1	0	1	0	1	0	1	0	1	0	1	0	1	0	1	0	1	0	1	0
BP	GO:0015967	diadenosine tetraphosphate catabolic process	6	0.15562	3	1	0	8.45259e-05	5	1	0	1	0	1	0	0.0934422	3	1	0	0.00372485	4	1	0	1	0	1	0	0.0630082	3	1	0	0.000758016	4	1	0	1	0	1	0
BP	GO:0015976	carbon utilization	24	1	2	0.139874	8	1	1	0.022443	7	1	0	1	0	1	0	0.0475099	8	1	0	0.000113666	11	1	0	1	0	1	0	0.157682	6	1	0	0.0200824	6	1	0	1	0
BP	GO:0015977	carbon fixation	20	1	0	1	0	1	0	1	0	1	0	1	0	1	0	1	0	1	0	1	0	1	0	1	0	1	0	1	0	1	0	1	0	1	0	1	0
BP	GO:0015979	photosynthesis	525	0.27264	63	1	28	1	11	1	13	1	2	1	5	1	27	1	21	1	9	1	27	1	0	1	1	1	22	1	13	1	5	1	11	1	0	1	0
BP	GO:0015986	ATP synthesis coupled proton transport	42	1	1	1	3	1	0	1	3	1	0	1	0	1	1	1	1	1	1	1	4	1	0	1	1	1	1	1	1	1	0	1	2	1	0	1	0
BP	GO:0015991	ATP hydrolysis coupled proton transport	29	1	0	0.151507	9	1	0	0.836594	4	1	0	1	0	1	0	0.0152066	10	1	0	0.680957	5	1	0	1	0	1	0	0.0447679	8	1	0	0.447949	4	1	0	1	0
BP	GO:0015994	chlorophyll metabolic process	79	1	7	1	9	1	3	1	3	1	0	1	0	1	3	1	10	1	3	1	9	1	0	1	2	1	3	1	6	1	2	1	2	1	0	1	0
BP	GO:0015995	chlorophyll biosynthetic process	372	2.10416e-06	69	1	25	0.25629	25	1	12	1	3	1	0	0.00596387	43	1	25	0.966143	24	1	25	1	0	1	1	0.0028967	38	1	17	0.845458	16	1	10	1	0	1	0
BP	GO:0015996	chlorophyll catabolic process	164	9.75721e-08	42	1	16	0.00866315	18	1	9	1	2	1	0	0.000122046	28	1	20	0.0787553	17	1	13	1	0	1	2	2.52329e-05	26	1	11	0.00446071	15	1	6	1	0	1	0
BP	GO:0016032	viral process	4	1	0	1	0	1	0	1	0	1	0	1	0	1	0	1	0	1	0	1	0	1	0	1	0	1	0	1	0	1	0	1	0	1	0	1	0
BP	GO:0016036	cellular response to phosphate starvation	428	1	46	1	60	1	18	1	28	1	6	1	1	1	32	0.637039	56	1	21	1	38	1	0	1	1	1	26	1	34	1	13	1	20	1	0	1	1
BP	GO:0016045	detection of bacterium	50	0.654476	8	1	4	0.712605	5	1	0	1	0	1	0	0.813478	6	1	3	0.475848	6	1	0	1	0	1	1	0.470653	6	1	3	0.753654	4	1	0	1	0	1	0
BP	GO:0016048	detection of temperature stimulus	6	1	0	0.845832	2	1	0	1	0	1	0	1	0	1	0	0.695989	2	1	0	0.582852	2	1	0	1	0	1	0	0.554927	2	1	0	1	0	1	0	1	0
BP	GO:0016049	cell growth	474	1	32	1	63	1	11	1	25	1	0	1	1	1	28	1	33	1	21	1	28	1	0	1	2	1	24	1	29	1	8	1	18	1	0	1	0
BP	GO:0016050	vesicle organization	4	1	0	1	0	1	0	1	0	1	0	1	0	1	0	1	0	1	0	1	0	1	0	1	0	1	0	1	0	1	0	1	0	1	0	1	0
BP	GO:0016051	carbohydrate biosynthetic process	172	1	4	0.0743293	37	1	2	1	11	1	1	1	0	1	5	1	13	1	6	1	10	1	0	1	1	1	3	1	12	1	2	1	6	1	0	1	0
BP	GO:0016070	RNA metabolic process	23	1	1	1	1	1	1	1	0	1	0	0.00676298	4	1	2	1	0	1	2	1	0	1	0	1	0	1	1	1	0	1	1	1	0	1	0	1	0
BP	GO:0016071	mRNA metabolic process	2	1	0	1	0	1	0	1	0	1	0	1	0	1	0	1	0	1	0	1	0	1	0	1	0	1	0	1	0	1	0	1	0	1	0	1	0
BP	GO:0016075	rRNA catabolic process	2	1	0	1	0	1	0	1	0	1	0	1	0	1	0	1	0	1	0	1	0	1	0	1	0	1	0	1	0	1	0	1	0	1	0	1	0
BP	GO:0016099	monoterpenoid biosynthetic process	7	1	0	1	0	1	0	1	0	1	1	1	0	1	0	1	0	1	0	1	0	1	0	1	0	1	0	1	0	1	0	1	0	1	0	1	0
BP	GO:0016102	diterpenoid biosynthetic process	2	1	0	1	0	1	0	1	0	1	0	1	0	1	0	1	0	1	0	1	0	1	0	1	0	1	0	1	0	1	0	1	0	1	0	1	0
BP	GO:0016104	triterpenoid biosynthetic process	9	1	0	1	0	1	0	1	0	1	0	1	0	1	1	1	0	1	0	1	0	1	0	1	0	1	0	1	0	1	0	1	0	1	0	1	0
BP	GO:0016106	sesquiterpenoid biosynthetic process	5	1	0	1	0	1	0	1	0	1	0	1	0	1	0	1	0	1	0	1	0	1	0	1	0	1	0	1	0	1	0	1	0	1	0	1	0
BP	GO:0016114	terpenoid biosynthetic process	31	1	2	1	3	1	2	1	1	1	0	1	1	1	3	1	2	0.74402	4	1	1	1	0	1	1	1	1	1	1	1	2	1	0	1	0	1	0
BP	GO:0016116	carotenoid metabolic process	2	0.11299	2	1	0	0.871675	1	1	0	1	0	1	0	0.088348	2	1	0	0.0674776	2	1	0	1	0	1	0	0.0630082	2	1	0	0.766787	1	1	0	1	0	1	0
BP	GO:0016117	carotenoid biosynthetic process	328	0.00208854	53	1	34	1	15	1	13	1	1	1	3	0.500832	29	1	23	1	15	1	22	1	0	1	1	0.409324	25	1	18	1	9	1	10	1	0	1	0
BP	GO:0016118	carotenoid catabolic process	3	0.249256	2	1	1	1	0	1	0	1	0	1	0	0.191058	2	1	0	1	0	1	0	1	0	1	0	0.142793	2	1	0	1	0	1	0	1	0	1	0
BP	GO:0016119	carotene metabolic process	5	1	1	1	0	1	0	1	0	1	0	1	0	0.380712	2	1	0	1	0	1	0	1	0	1	0	1	1	1	0	1	0	1	0	1	0	1	0
BP	GO:0016120	carotene biosynthetic process	26	1	3	1	0	1	0	1	1	1	0	1	0	1	0	1	0	1	0	1	0	1	0	1	0	1	0	1	0	1	0	1	0	1	0	1	0
BP	GO:0016121	carotene catabolic process	3	0.249256	2	1	1	1	0	1	0	1	0	1	0	0.191058	2	1	0	1	0	1	0	1	0	1	0	0.142793	2	1	0	1	0	1	0	1	0	1	0
BP	GO:0016122	xanthophyll metabolic process	6	1	1	1	1	1	0	1	1	1	0	1	0	1	1	0.695989	2	1	0	0.582852	2	1	0	1	0	1	1	1	1	1	0	1	1	1	0	1	0
BP	GO:0016123	xanthophyll biosynthetic process	26	0.296955	6	1	1	1	0	1	1	1	0	1	0	0.704301	4	1	0	1	0	1	0	1	0	1	0	1	3	1	0	1	0	1	0	1	0	1	0
BP	GO:0016124	xanthophyll catabolic process	3	0.249256	2	1	1	1	0	1	0	1	0	1	0	0.191058	2	1	0	1	0	1	0	1	0	1	0	0.142793	2	1	0	1	0	1	0	1	0	1	0
BP	GO:0016125	sterol metabolic process	17	1	0	0.88267	4	1	0	0.276126	4	1	0	1	0	1	0	0.626739	4	1	0	0.438763	4	1	0	1	0	1	0	0.400048	4	1	0	0.116454	4	1	0	1	0
BP	GO:0016126	sterol biosynthetic process	526	1	29	1.50388e-17	155	1	14	1.06298e-08	80	1	6	1	2	1	26	2.19536e-11	117	1	19	1.71544e-07	91	1	0	1	5	1	24	3.00623e-13	105	1	13	1.05083e-07	61	1	0	1	0
BP	GO:0016127	sterol catabolic process	5	1	1	0.170437	3	1	1	0.0524224	3	1	0	1	0	1	0	0.11967	3	1	0	0.0868169	3	1	0	1	0	1	0	0.0769388	3	1	0	0.0241333	3	1	0	1	0
BP	GO:0016131	brassinosteroid metabolic process	35	0.37223	7	0.164016	10	1	1	0.317034	6	1	1	1	0	0.00212093	10	0.540271	7	0.926819	4	0.306622	7	1	0	1	0	0.149971	6	0.260262	7	1	1	0.0995286	6	1	0	1	0
BP	GO:0016132	brassinosteroid biosynthetic process	404	1	9	9.686e-28	150	1	5	1.08903e-12	76	1	2	1	2	1	11	6.37846e-20	116	1	6	6.84472e-11	84	1	0	1	3	1	8	2.1009e-23	108	1	4	1.68164e-10	58	1	0	1	0
BP	GO:0016139	glycoside catabolic process	14	1	1	1	3	1	0	0.557334	3	1	0	1	0	1	0	0.922643	3	1	0	0.716567	3	1	0	1	0	1	0	0.690501	3	1	0	0.910268	2	1	0	1	0
BP	GO:0016192	vesicle-mediated transport	627	1	41	1	49	1	12	1	24	1	1	1	2	1	28	1	38	1	22	1	30	1	1	1	1	1	18	1	27	1	8	1	16	1	0	1	0
BP	GO:0016197	endosomal transport	115	1	4	1	6	1	2	1	4	1	0	1	0	1	7	1	7	1	5	1	5	1	0	1	1	1	3	1	4	1	1	1	2	1	0	1	0
BP	GO:0016226	iron-sulfur cluster assembly	312	1	34	1	31	1	10	1	17	1	1	1	2	1	22	1	25	1	8	1	22	1	1	1	0	1	19	1	21	1	3	1	13	1	0	1	0
BP	GO:0016233	telomere capping	7	1	0	1	0	1	0	1	0	1	0	1	0	1	0	1	0	1	0	1	0	1	0	1	0	1	0	1	0	1	0	1	0	1	0	1	0
BP	GO:0016236	macroautophagy	2	0.979073	1	1	0	1	0	1	0	1	0	1	0	1	0	1	0	1	0	1	0	1	0	1	0	1	0	1	0	1	0	1	0	1	0	1	0
BP	GO:0016246	RNA interference	246	1	9	1	38	1	5	1	13	1	0	1	0	1	4	1	26	1	1	1	25	1	0	1	0	1	3	1	23	1	1	1	11	1	0	1	0
BP	GO:0016310	phosphorylation	80	0.101145	15	1	11	1	6	1	3	1	1	1	0	0.210174	11	1	10	1	5	1	9	1	0	1	1	0.297567	9	1	9	1	3	1	3	1	0	1	0
BP	GO:0016311	dephosphorylation	10	1	2	0.717693	3	0.743964	2	1	1	1	1	1	0	1	1	1	2	1	1	0.395392	3	1	0	1	0	1	1	1	2	1	1	1	1	1	0	1	0
BP	GO:0016441	posttranscriptional gene silencing	38	1	1	0.254245	10	1	2	1	3	1	1	1	0	1	0	1	6	1	0	1	3	0.215009	2	1	0	1	0	0.672686	6	1	0	1	2	1	0	1	0
BP	GO:0016444	somatic cell DNA recombination	83	1	2	0.282192	18	1	0	1	3	1	0	1	0	1	2	1	11	1	1	0.731026	11	1	0	1	0	1	1	0.672686	11	1	0	1	3	1	0	1	0
BP	GO:0016458	gene silencing	193	1	4	4.12208e-20	83	1	1	0.194432	22	1	0	1	1	1	3	1.96126e-18	71	1	1	1.44809e-15	60	1	0	1	0	1	3	4.19616e-21	67	1	1	0.0979372	18	1	0	1	0
BP	GO:0016482	cytosolic transport	7	1	0	1	0	1	0	1	0	1	0	1	0	1	0	1	0	1	0	1	0	1	0	1	0	1	0	1	0	1	0	1	0	1	0	1	0
BP	GO:0016485	protein processing	22	1	1	1	1	1	0	1	2	1	0	1	0	1	0	1	1	1	0	1	0	1	0	1	0	1	0	1	0	1	0	1	0	1	0	1	0
BP	GO:0016487	farnesol metabolic process	8	1	1	1	2	1	1	1	0	1	0	1	0	1	1	1	1	1	0	1	0	1	0	1	0	1	1	1	1	1	0	1	0	1	0	1	0
BP	GO:0016540	protein autoprocessing	2	1	0	1	0	1	0	1	0	1	0	1	0	1	0	1	0	1	0	1	0	1	0	1	0	1	0	1	0	1	0	1	0	1	0	1	0
BP	GO:0016553	base conversion or substitution editing	8	0.973113	2	1	0	1	0	1	0	1	0	1	0	1	0	1	0	1	0	1	0	1	0	1	0	1	0	1	0	1	0	1	0	1	0	1	0
BP	GO:0016554	cytidine to uridine editing	15	1	0	1	2	1	0	1	0	1	0	1	0	1	0	1	2	1	0	1	0	1	0	1	0	1	0	1	0	1	0	1	0	1	0	1	0
BP	GO:0016556	mRNA modification	233	1	20	1	17	1	5	1	12	1	2	1	1	1	15	1	8	1	6	1	9	1	0	1	2	1	11	1	5	1	3	1	3	1	0	1	0
BP	GO:0016558	protein import into peroxisome matrix	305	0.00379342	49	1	14	0.476811	20	1	2	1	3	1	0	0.281277	29	1	10	0.279166	24	1	3	1	0	1	0	0.157486	26	1	7	1	13	1	1	1	0	1	0
BP	GO:0016559	peroxisome fission	32	1	4	1	0	1	0	1	0	1	0	1	0	1	1	1	2	1	0	1	0	1	0	1	0	1	1	1	0	1	0	1	0	1	0	1	0
BP	GO:0016560	protein import into peroxisome matrix, docking	2	0.979073	1	1	0	1	0	1	0	1	0	1	0	1	0	1	0	1	0	1	0	1	0	1	0	1	0	1	0	1	0	1	0	1	0	1	0
BP	GO:0016567	protein ubiquitination	550	1	37	1	42	1	15	1	10	1	4	1	8	1	21	1	25	1	22	1	22	1	4	1	5	1	13	1	19	1	9	1	7	1	0	1	0
BP	GO:0016569	covalent chromatin modification	65	1	3	1	5	1	0	1	1	1	0	1	0	1	3	1	2	1	0	1	3	1	0	1	0	1	3	1	2	1	0	1	1	1	0	1	0
BP	GO:0016570	histone modification	181	1	3	0.0132228	42	1	2	1	9	1	0	1	0	1	1	0.113395	31	1	0	0.139892	26	1	0	1	3	1	1	0.255133	24	1	0	1	8	1	0	1	0
BP	GO:0016571	histone methylation	202	1	9	1	16	1	2	1	5	1	0	1	5	1	4	1	12	1	5	1	11	1	0	1	1	1	4	1	8	1	2	1	4	1	0	1	0
BP	GO:0016572	histone phosphorylation	194	1	2	3.42903e-15	75	1	0	2.77453e-06	37	1	0	1	0	1	0	1.33292e-14	65	1	0	1.17193e-13	57	1	1	1	0	1	0	1.17545e-13	56	1	0	2.84471e-06	30	1	0	1	0
BP	GO:0016573	histone acetylation	16	1	0	1	0	1	0	1	0	1	0	1	0	1	0	1	0	1	0	1	0	1	0	1	0	1	0	1	0	1	0	1	0	1	0	1	0
BP	GO:0016575	histone deacetylation	35	1	2	1	1	1	1	1	0	1	1	1	0	1	1	1	1	1	1	1	0	1	0	1	0	1	1	1	1	1	1	1	0	1	0	1	0
BP	GO:0016578	histone deubiquitination	4	1	0	1	0	1	0	1	0	1	0	1	0	1	0	1	0	1	0	1	0	1	0	1	0	1	0	1	0	1	0	1	0	1	0	1	0
BP	GO:0016579	protein deubiquitination	166	1	10	1	9	1	3	1	3	1	0	0.900871	5	1	5	1	6	1	5	1	8	1	0	1	0	1	5	1	3	1	3	1	2	1	0	1	0
BP	GO:0016598	protein arginylation	5	1	0	1	1	1	0	1	0	1	0	1	0	1	0	1	0	1	0	1	0	1	0	1	0	1	0	1	0	1	0	1	0	1	0	1	0
BP	GO:0016925	protein sumoylation	70	1	7	1	2	1	1	1	2	1	0	1	0	1	6	1	2	1	2	1	2	1	0	1	1	1	3	1	0	1	1	1	1	1	0	1	0
BP	GO:0016926	protein desumoylation	286	1	11	1	37	1	2	1	13	1	4	1	0	1	5	1	27	1	6	1	18	1	2	1	0	1	5	1	20	1	2	1	11	1	1	1	0
BP	GO:0016973	poly(A)+ mRNA export from nucleus	19	1	1	1	0	1	1	1	0	1	0	1	0	1	1	1	0	1	0	1	0	1	0	1	0	1	1	1	0	1	0	1	0	1	0	1	0
BP	GO:0016998	cell wall macromolecule catabolic process	34	1	3	0.0696931	11	1	1	0.645486	5	1	0	1	0	1	1	1	4	1	2	0.270172	7	1	0	1	0	1	1	1	4	1	1	0.241777	5	1	0	1	0
BP	GO:0017004	cytochrome complex assembly	14	1	0	1	1	1	0	1	0	1	0	1	0	1	0	1	0	1	0	1	0	1	0	1	0	1	0	1	0	1	0	1	0	1	0	1	0
BP	GO:0017126	nucleologenesis	3	1	0	1	1	1	0	1	0	1	0	1	0	1	0	1	1	1	0	1	0	1	0	1	0	1	0	1	1	1	0	1	0	1	0	1	0
BP	GO:0017145	stem cell division	6	1	0	1	0	1	0	1	0	1	0	1	0	1	0	1	1	1	0	1	0	1	0	1	0	1	0	1	0	1	0	1	0	1	0	1	0
BP	GO:0017148	negative regulation of translation	29	1	2	0.151507	9	0.493589	4	1	2	1	0	1	0	1	3	0.27574	7	0.646811	4	0.680957	5	1	0	1	0	1	2	0.305813	6	0.198511	4	1	2	1	0	1	0
BP	GO:0017157	regulation of exocytosis	8	1	1	0.51809	3	1	0	0.71992	2	1	0	1	0	1	1	0.949169	2	1	1	0.830673	2	1	0	1	0	1	1	0.830378	2	1	0	0.457844	2	1	0	1	0
BP	GO:0017183	peptidyl-diphthamide biosynthetic process from peptidyl-histidine	5	1	1	1	0	1	0	1	0	1	0	1	1	1	0	1	0	1	0	1	0	1	0	1	0	1	0	1	0	1	0	1	0	1	0	1	0
BP	GO:0017186	peptidyl-pyroglutamic acid biosynthetic process, using glutaminyl-peptide cyclotransferase	2	1	0	1	0	0.871675	1	1	0	1	0	1	0	0.088348	2	1	0	1	0	1	0	1	0	1	0	1	0	1	0	1	0	1	0	1	0	1	0
BP	GO:0018008	N-terminal peptidyl-glycine N-myristoylation	8	1	1	1	1	1	1	1	1	1	0	1	0	1	0	1	1	1	1	1	0	1	0	1	0	1	0	1	1	1	1	1	0	1	0	1	0
BP	GO:0018022	peptidyl-lysine methylation	2	1	0	0.157942	2	1	0	1	0	1	0	1	0	1	0	1	0	1	0	1	0	1	0	1	0	1	0	1	0	1	0	1	0	1	0	1	0
BP	GO:0018023	peptidyl-lysine trimethylation	2	0.979073	1	1	0	1	0	1	0	1	0	1	0	0.898895	1	1	0	1	0	1	0	1	0	1	0	0.772216	1	1	0	1	0	1	0	1	0	1	0
BP	GO:0018063	cytochrome c-heme linkage	2	1	0	1	0	1	0	1	0	1	0	1	0	1	0	1	0	1	0	1	0	1	0	1	0	1	0	1	0	1	0	1	0	1	0	1	0
BP	GO:0018105	peptidyl-serine phosphorylation	6	1	0	1	0	1	0	1	0	1	0	1	0	1	0	1	0	1	0	1	0	1	0	1	0	1	0	1	0	1	0	1	0	1	0	1	0
BP	GO:0018119	peptidyl-cysteine S-nitrosylation	73	0.57321	11	1	2	1	2	1	0	1	0	1	0	1	3	1	0	1	3	1	3	1	0	1	2	1	3	1	0	1	2	1	0	1	0	1	0
BP	GO:0018131	oxazole or thiazole biosynthetic process	6	1	0	1	0	1	0	1	0	1	0	1	0	1	0	1	0	1	0	1	0	1	0	1	0	1	0	1	0	1	0	1	0	1	0	1	0
BP	GO:0018208	peptidyl-proline modification	70	1	7	1	6	1	1	1	6	1	0	1	0	1	3	1	4	1	1	1	6	1	0	1	0	1	2	1	4	1	1	1	4	1	0	1	0
BP	GO:0018258	protein O-linked glycosylation via hydroxyproline	5	1	0	0.688106	2	1	0	1	1	1	0	1	0	1	0	1	1	1	0	1	1	1	0	1	0	1	0	1	1	1	0	1	1	1	0	1	0
BP	GO:0018279	protein N-linked glycosylation via asparagine	4	1	0	1	0	1	0	1	0	1	0	1	0	1	0	1	0	1	0	1	0	1	0	1	0	1	0	1	0	1	0	1	0	1	0	1	0
BP	GO:0018283	iron incorporation into metallo-sulfur cluster	1	1	0	1	0	1	0	1	0	1	0	1	0	1	0	1	0	1	0	0.576733	1	1	0	1	0	1	0	1	0	1	0	1	0	1	0	1	0
BP	GO:0018315	molybdenum incorporation into molybdenum-molybdopterin complex	5	1	1	1	0	1	1	1	0	1	0	1	0	1	1	1	0	0.356479	2	1	0	1	0	1	0	1	0	1	0	1	1	1	0	1	0	1	0
BP	GO:0018316	peptide cross-linking via L-cystine	4	0.377063	2	1	0	1	1	1	0	1	0	1	0	1	0	1	0	1	0	1	0	1	0	1	0	1	0	1	0	1	0	1	0	1	0	1	0
BP	GO:0018342	protein prenylation	8	1	0	1	1	1	0	1	0	1	0	1	0	1	0	1	0	1	0	1	0	1	0	1	0	1	0	1	0	1	0	1	0	1	0	1	0
BP	GO:0018343	protein farnesylation	2	1	0	1	0	1	0	1	0	1	0	1	0	1	0	1	0	1	0	1	0	1	0	1	0	1	0	1	0	1	0	1	0	1	0	1	0
BP	GO:0018344	protein geranylgeranylation	4	1	0	1	0	1	0	1	0	1	0	1	0	1	0	1	0	1	0	1	0	1	0	1	0	1	0	1	0	1	0	1	0	1	0	1	0
BP	GO:0018345	protein palmitoylation	9	1	0	1	1	1	0	1	0	1	0	1	0	1	0	1	1	1	0	1	0	1	0	1	0	1	0	1	0	1	0	1	0	1	0	1	0
BP	GO:0018377	protein myristoylation	5	1	0	1	0	1	0	1	0	1	0	1	0	1	0	1	1	1	0	1	0	1	0	1	0	1	0	1	0	1	0	1	0	1	0	1	0
BP	GO:0018401	peptidyl-proline hydroxylation to 4-hydroxy-L-proline	34	0.326781	7	1	0	0.0891858	6	1	0	1	0	1	0	0.104755	7	1	0	0.00749926	8	1	1	1	0	1	0	0.0447266	7	1	0	0.0175526	6	1	0	1	0	1	0
BP	GO:0018874	benzoate metabolic process	6	1	0	1	1	1	0	1	1	1	0	1	0	1	0	1	1	1	0	0.582852	2	1	0	1	0	1	0	1	1	1	0	1	1	1	0	1	0
BP	GO:0018920	glyphosate metabolic process	4	1	0	1	1	1	0	1	0	1	0	1	0	1	0	1	0	1	0	1	0	1	0	1	0	1	0	1	0	1	0	1	0	1	0	1	0
BP	GO:0019048	modulation by virus of host morphology or physiology	4	1	0	1	0	1	0	1	0	1	0	1	0	1	0	1	0	1	0	1	0	1	0	1	0	1	0	1	0	1	0	1	0	1	0	1	0
BP	GO:0019079	viral genome replication	17	1	0	1	3	1	0	1	1	1	0	1	0	1	0	1	3	1	0	1	0	1	0	1	0	1	0	1	2	1	0	1	0	1	0	1	0
BP	GO:0019216	regulation of lipid metabolic process	66	1	5	1	9	1	2	1	3	1	0	1	0	1	2	1	9	1	2	0.787404	9	1	0	1	1	1	2	1	6	1	1	1	2	1	0	1	0
BP	GO:0019243	methylglyoxal catabolic process to D-lactate via S-lactoyl-glutathione	301	1	23	1	23	1	15	1	8	1	2	1	2	1	17	1	13	1	13	1	13	1	0	1	1	1	14	1	10	1	10	1	7	1	0	1	0
BP	GO:0019252	starch biosynthetic process	553	1	58	1	72	1	10	1	31	1	0	1	0	1	29	1	56	1	11	1	52	1	0	1	2	1	23	1	47	1	4	1	25	1	0	1	0
BP	GO:0019253	reductive pentose-phosphate cycle	26	0.645106	5	1	2	1	1	1	1	1	0	1	0	1	0	1	2	1	0	1	0	1	0	1	0	1	0	1	2	1	0	1	0	1	0	1	0
BP	GO:0019255	glucose 1-phosphate metabolic process	15	1	0	1	2	1	0	1	0	1	0	1	0	1	0	1	0	1	0	1	0	1	0	1	0	1	0	1	0	1	0	1	0	1	0	1	0
BP	GO:0019276	UDP-N-acetylgalactosamine metabolic process	6	1	0	0.0580789	4	1	0	1	1	1	0	1	0	1	0	1	1	1	0	1	1	1	0	1	0	1	0	1	1	1	0	1	1	1	0	1	0
BP	GO:0019279	L-methionine biosynthetic process from L-homoserine via cystathionine	5	1	0	0.170437	3	1	0	1	0	1	0	1	0	1	0	0.11967	3	1	0	0.470499	2	1	0	1	0	1	0	0.0769388	3	1	0	1	0	1	0	1	0
BP	GO:0019287	isopentenyl diphosphate biosynthetic process, mevalonate pathway	12	1	0	1	1	1	0	1	0	1	0	1	0	1	0	1	0	1	0	1	0	1	0	1	0	1	0	1	0	1	0	1	0	1	0	1	0
BP	GO:0019288	isopentenyl diphosphate biosynthetic process, methylerythritol 4-phosphate pathway	735	0.000430377	105	1	70	1	31	1	40	1	5	1	0	0.0924749	66	1	55	1	26	1	59	1	0	1	2	0.0490613	57	1	43	1	18	1	30	1	0	1	0
BP	GO:0019294	keto-3-deoxy-D-manno-octulosonic acid biosynthetic process	4	1	0	0.51809	2	1	0	1	1	1	0	1	0	1	0	1	0	1	0	1	0	1	0	1	0	1	0	1	0	1	0	1	0	1	0	1	0
BP	GO:0019305	dTDP-rhamnose biosynthetic process	6	1	0	0.273916	3	1	0	1	0	1	0	1	0	1	0	0.695989	2	1	0	1	1	1	0	1	0	1	0	0.554927	2	1	0	1	0	1	0	1	0
BP	GO:0019307	mannose biosynthetic process	6	1	0	0.273916	3	1	0	0.082393	3	1	0	1	0	1	0	0.695989	2	1	0	0.582852	2	1	0	1	0	1	0	0.554927	2	1	0	0.303667	2	1	0	1	0
BP	GO:0019344	cysteine biosynthetic process	740	1	67	0.076472	130	1	29	0.51277	63	1	10	1	1	1	22	0.0082821	113	1	21	0.0186581	93	1	1	1	4	1	19	0.0184732	91	1	15	0.192532	49	1	0	1	0
BP	GO:0019354	siroheme biosynthetic process	4	1	1	0.51809	2	1	0	1	1	1	0	1	1	1	0	1	1	1	0	1	1	1	0	1	0	1	0	1	1	1	0	1	1	1	0	1	0
BP	GO:0019358	nicotinate nucleotide salvage	4	1	0	1	1	1	0	1	1	1	0	1	0	1	0	1	0	1	0	1	1	1	0	1	0	1	0	1	0	1	0	1	1	1	0	1	0
BP	GO:0019363	pyridine nucleotide biosynthetic process	12	1	2	1	2	1	1	0.0203793	5	1	0	1	0	1	2	1	2	1	1	1	2	1	0	1	0	0.900076	2	1	2	1	1	0.758778	2	1	0	1	0
BP	GO:0019365	pyridine nucleotide salvage	3	1	0	1	0	1	0	1	0	1	0	1	0	1	1	1	0	1	0	1	0	1	0	1	0	1	0	1	0	1	0	1	0	1	0	1	0
BP	GO:0019370	leukotriene biosynthetic process	4	1	0	1	1	1	0	1	1	1	0	1	0	1	0	1	1	1	0	1	1	1	0	1	0	1	0	1	1	1	0	1	1	1	0	1	0
BP	GO:0019373	epoxygenase P450 pathway	2	1	0	0.157942	2	1	0	0.802657	1	1	0	1	0	1	0	0.11967	2	1	0	0.0982751	2	1	0	1	0	1	0	0.0902099	2	1	0	0.665369	1	1	0	1	0
BP	GO:0019374	galactolipid metabolic process	5	1	1	0.688106	2	1	0	0.381142	2	1	0	1	0	1	0	1	1	1	0	1	1	1	0	1	0	1	0	1	1	1	0	1	1	1	0	1	0
BP	GO:0019375	galactolipid biosynthetic process	284	0.00816818	45	1	34	0.118536	22	1	21	1	4	1	0	0.00172509	37	1	33	0.979837	19	1	24	1	0	1	0	0.00368797	31	1	22	0.507293	14	1	16	1	0	1	0
BP	GO:0019379	sulfate assimilation, phosphoadenylyl sulfate reduction by phosphoadenylyl-sulfate reductase (thioredoxin)	2	0.11299	2	1	0	1	0	1	0	1	0	1	0	0.088348	2	1	0	1	0	1	0	1	0	1	0	0.0630082	2	1	0	1	0	1	0	1	0	1	0
BP	GO:0019388	galactose catabolic process	11	1	0	1	2	1	0	1	0	1	0	1	0	1	0	1	0	1	0	1	0	1	0	1	0	1	0	1	0	1	0	1	0	1	0	1	0
BP	GO:0019395	fatty acid oxidation	10	1	2	1	1	1	0	1	0	1	0	1	0	1	0	1	1	1	0	1	1	1	0	1	0	1	0	1	1	1	0	1	0	1	0	1	0
BP	GO:0019408	dolichol biosynthetic process	44	1	4	1	7	1	1	0.310987	7	1	0	1	0	1	2	1	5	1	1	0.337837	8	1	0	1	0	1	2	1	4	1	0	0.208613	6	1	0	1	0
BP	GO:0019419	sulfate reduction	9	1	1	1	0	1	0	1	0	1	0	1	0	0.849485	2	1	0	1	0	1	0	1	0	1	0	1	1	1	0	1	0	1	0	1	0	1	0
BP	GO:0019428	allantoin biosynthetic process	2	1	0	1	0	1	0	1	0	1	0	1	0	1	0	1	0	1	0	1	0	1	0	1	0	1	0	1	0	1	0	1	0	1	0	1	0
BP	GO:0019430	removal of superoxide radicals	26	1	2	1	1	1	0	1	1	1	0	1	1	1	0	1	0	1	0	1	1	0.159807	2	1	0	1	0	1	0	1	0	1	0	1	0	1	0
BP	GO:0019432	triglyceride biosynthetic process	45	1	1	1	4	1	1	1	4	1	0	1	0	1	1	1	4	1	2	0.361132	8	1	0	1	0	1	0	1	3	1	1	1	4	1	0	1	0
BP	GO:0019433	triglyceride catabolic process	5	0.00783127	4	1	1	1	0	1	0	1	0	1	0	1	0	1	0	1	0	1	0	1	0	1	0	1	0	1	0	1	0	1	0	1	0	1	0
BP	GO:0019447	D-cysteine catabolic process	2	1	0	1	0	1	0	1	0	1	0	1	0	1	0	0.922643	1	1	0	1	0	1	0	1	0	1	0	1	0	1	0	1	0	1	0	1	0
BP	GO:0019450	L-cysteine catabolic process to pyruvate	2	0.11299	2	1	0	0.0674364	2	1	0	1	0	1	0	0.898895	1	1	0	1	0	1	0	1	0	1	0	0.772216	1	1	0	1	0	1	0	1	0	1	0
BP	GO:0019458	methionine catabolic process via 2-oxobutanoate	2	1	0	0.982512	1	1	0	0.802657	1	1	0	1	0	1	0	0.922643	1	1	0	0.836012	1	1	0	1	0	1	0	0.850511	1	1	0	0.665369	1	1	0	1	0
BP	GO:0019464	glycine decarboxylation via glycine cleavage system	8	1	0	0.51809	3	1	0	1	1	1	1	1	0	1	0	0.949169	2	1	0	1	1	1	0	1	0	1	0	0.830378	2	1	0	1	0	1	0	1	0
BP	GO:0019477	L-lysine catabolic process	8	0.973113	2	1	1	1	0	0.71992	2	1	0	1	0	1	0	1	1	1	0	0.830673	2	1	0	1	0	1	0	1	0	1	0	0.457844	2	1	0	1	0
BP	GO:0019478	D-amino acid catabolic process	2	1	0	1	0	1	0	1	0	1	0	1	0	1	0	1	0	1	0	1	0	1	0	1	0	1	0	1	0	1	0	1	0	1	0	1	0
BP	GO:0019481	L-alanine catabolic process, by transamination	7	0.00340688	5	1	0	0.000259737	5	1	0	1	0	1	1	0.000922863	5	1	0	0.000387688	5	1	0	1	0	1	0	0.000386214	5	1	0	4.53436e-05	5	1	0	1	0	1	0
BP	GO:0019484	beta-alanine catabolic process	6	1	0	1	1	1	0	1	1	1	1	1	0	1	0	0.695989	2	1	0	0.129114	3	1	0	1	0	1	0	1	1	1	0	1	1	1	0	1	0
BP	GO:0019499	cyanide metabolic process	7	0.818436	2	0.982512	2	1	1	1	1	1	0	1	0	1	1	1	1	1	1	1	1	1	0	1	0	1	1	1	1	1	1	1	1	1	0	1	0
BP	GO:0019500	cyanide catabolic process	5	1	0	0.688106	2	1	0	1	1	1	0	1	0	1	0	1	1	1	0	1	1	1	0	1	0	1	0	1	1	1	0	1	1	1	0	1	0
BP	GO:0019509	L-methionine salvage from methylthioadenosine	10	1	0	1	0	1	0	1	0	1	0	1	0	1	0	1	0	1	0	1	0	1	0	1	0	1	0	1	0	1	0	1	0	1	0	1	0
BP	GO:0019538	protein metabolic process	6	1	0	0.845832	2	1	0	0.082393	3	1	0	1	0	1	0	0.695989	2	1	0	0.582852	2	1	0	1	0	1	0	0.554927	2	1	0	0.303667	2	1	0	1	0
BP	GO:0019544	arginine catabolic process to glutamate	6	0.679037	2	1	1	1	0	1	1	1	0	1	0	1	1	1	1	1	0	0.129114	3	1	0	1	0	1	1	1	1	1	0	1	1	1	0	1	0
BP	GO:0019563	glycerol catabolic process	15	1	0	1	2	1	0	1	1	1	0	1	0	1	0	1	2	1	0	1	2	1	0	1	0	1	0	1	2	1	0	1	1	1	0	1	0
BP	GO:0019566	arabinose metabolic process	2	1	0	1	0	1	0	0.0743321	2	1	0	1	0	1	0	0.922643	1	1	0	0.0982751	2	1	0	1	0	1	0	1	0	1	0	0.0433033	2	1	0	1	0
BP	GO:0019567	arabinose biosynthetic process	2	1	0	1	0	1	0	1	0	1	0	1	0	1	0	1	0	1	0	1	0	1	0	1	0	1	0	1	0	1	0	1	0	1	0	1	0
BP	GO:0019593	mannitol biosynthetic process	2	1	0	1	0	1	0	0.802657	1	1	0	1	0	1	0	0.922643	1	1	0	0.0982751	2	1	0	1	0	1	0	1	0	1	0	0.665369	1	1	0	1	0
BP	GO:0019605	butyrate metabolic process	2	1	0	1	0	1	0	1	0	1	0	1	0	1	0	1	0	1	0	1	0	1	0	1	0	1	0	1	0	1	0	1	0	1	0	1	0
BP	GO:0019632	shikimate metabolic process	9	1	0	1	0	1	0	1	0	1	0	1	0	1	0	1	1	1	0	1	0	1	0	1	0	1	0	1	0	1	0	1	0	1	0	1	0
BP	GO:0019674	NAD metabolic process	2	1	0	1	0	1	0	1	0	1	0	1	0	1	0	1	0	1	0	1	0	1	0	1	0	1	0	1	0	1	0	1	0	1	0	1	0
BP	GO:0019676	ammonia assimilation cycle	13	0.742772	3	0.200385	5	1	1	1	1	1	0	1	0	0.464323	3	0.113395	5	0.358852	3	1	1	1	0	1	0	0.331591	3	0.0535778	5	1	1	1	1	1	0	1	0
BP	GO:0019684	photosynthesis, light reaction	518	0.292402	62	1	24	1	11	1	13	1	1	1	3	1	25	1	23	1	17	1	25	1	0	1	2	1	18	1	12	1	3	1	9	1	0	1	1
BP	GO:0019685	photosynthesis, dark reaction	2	1	0	1	0	1	0	1	0	1	0	1	0	1	0	1	0	1	0	1	0	1	0	1	0	1	0	1	0	1	0	1	0	1	0	1	0
BP	GO:0019722	calcium-mediated signaling	192	1	21	0.687742	33	1	9	1	13	1	2	1	0	1	15	0.128423	32	1	12	0.830673	22	1	0	1	1	0.900076	14	0.187593	26	1	9	1	10	1	0	1	0
BP	GO:0019725	cellular homeostasis	6	0.15562	3	1	0	1	1	1	0	1	0	1	0	0.489154	2	1	0	1	1	1	0	1	0	1	0	0.401476	2	1	0	1	1	1	0	1	0	1	0
BP	GO:0019745	pentacyclic triterpenoid biosynthetic process	110	1	12	1	16	1	6	1	8	1	1	1	0	0.793218	11	1	11	1	8	1	12	1	0	1	0	0.582956	10	1	8	1	5	0.984561	8	1	0	1	0
BP	GO:0019748	secondary metabolic process	146	1	15	0.0322061	34	0.871675	10	0.84207	14	1	1	1	0	1	12	0.0719928	27	1	9	0.13574	22	1	0	1	1	0.967327	11	0.108522	22	0.407984	9	1	10	1	0	1	0
BP	GO:0019750	chloroplast localization	3	1	0	1	0	1	0	1	0	1	0	1	0	1	0	1	0	1	0	1	0	1	0	1	0	1	0	1	0	1	0	1	0	1	0	1	0
BP	GO:0019760	glucosinolate metabolic process	125	0.377063	18	1	20	1	5	1	7	1	0	1	0	1	10	0.965987	17	1	5	0.60869	16	1	0	1	1	1	7	1	14	1	2	1	7	1	0	1	0
BP	GO:0019761	glucosinolate biosynthetic process	556	1	37	8.51124e-18	162	1	19	0.0313346	58	0.105486	11	1	1	1	27	6.38649e-16	134	1	22	1.06138e-06	92	1	4	1	2	1	18	2.12074e-14	112	1	11	0.00961564	46	1	0	1	0
BP	GO:0019762	glucosinolate catabolic process	43	1	2	0.138987	12	1	1	5.04626e-05	14	1	0	1	0	1	0	0.330186	9	1	1	0.000117279	15	1	0	1	0	1	0	1	5	1	1	4.61096e-05	12	1	0	1	0
BP	GO:0019827	stem cell population maintenance	26	1	2	1	0	1	1	1	0	1	0	1	1	1	1	1	0	1	1	1	2	1	0	1	0	1	1	1	0	1	1	1	0	1	0	1	0
BP	GO:0019853	L-ascorbic acid biosynthetic process	47	1	6	1	6	1	4	0.389916	7	1	1	1	0	1	5	1	4	0.866595	5	1	5	1	0	1	0	0.762602	5	1	3	0.653382	4	0.601317	5	1	0	1	0
BP	GO:0019915	lipid storage	269	1	14	1	24	1	6	1	3	1	2	1	3	1	9	1	15	1	9	1	9	0.20037	4	1	2	1	7	1	13	1	3	1	2	1	0	1	0
BP	GO:0019919	peptidyl-arginine methylation, to asymmetrical-dimethyl arginine	11	1	1	1	1	1	0	1	0	1	0	1	1	1	0	1	0	1	0	1	0	1	0	1	0	1	0	1	0	1	0	1	0	1	0	1	0
BP	GO:0019932	second-messenger-mediated signaling	63	1	1	0.0703052	17	1	0	0.149044	10	1	0	1	0	1	0	0.098898	14	1	0	0.118899	12	1	0	1	0	1	0	0.0191949	14	1	0	0.144945	8	1	0	1	0
BP	GO:0019953	sexual reproduction	16	1	0	0.0511707	7	1	0	1	0	1	0	1	0	1	0	0.00375124	8	1	0	1	1	1	0	1	0	1	0	0.34471	4	1	0	1	0	1	0	1	0
BP	GO:0019985	translesion synthesis	2	1	0	1	0	1	0	1	0	1	0	1	0	1	0	1	0	1	0	1	0	1	0	1	0	1	0	1	0	1	0	1	0	1	0	1	0
BP	GO:0022603	regulation of anatomical structure morphogenesis	1	1	0	1	0	1	0	1	0	1	0	1	0	1	0	0.622621	1	1	0	1	0	1	0	1	0	1	0	1	0	1	0	1	0	1	0	1	0
BP	GO:0022619	generative cell differentiation	4	1	0	1	0	1	0	1	0	1	0	1	0	1	0	1	0	1	0	1	1	1	0	1	0	1	0	1	0	1	0	1	0	1	0	1	0
BP	GO:0022622	root system development	17	1	1	1	1	1	0	1	0	1	0	1	0	1	1	1	2	1	0	1	0	1	0	1	0	1	1	1	1	1	0	1	0	1	0	1	0
BP	GO:0022900	electron transport chain	7	1	0	0.982512	2	1	0	1	0	1	0	1	0	1	0	1	1	1	0	1	0	1	0	1	0	1	0	1	1	1	0	1	0	1	0	1	0
BP	GO:0022904	respiratory electron transport chain	6	1	0	1	0	1	0	1	0	1	0	1	0	1	0	1	0	1	0	1	0	1	0	1	0	1	0	1	0	1	0	1	0	1	0	1	0
BP	GO:0023052	signaling	2	1	0	0.157942	2	1	0	0.0743321	2	1	0	1	0	1	0	0.922643	1	1	0	0.0982751	2	1	0	1	0	1	0	0.850511	1	1	0	0.0433033	2	1	0	1	0
BP	GO:0030001	metal ion transport	97	1	11	1	12	1	4	1	9	1	0	1	0	1	8	1	7	1	6	0.0868169	17	0.0174762	4	1	0	1	6	1	5	1	4	0.419664	9	1	0	1	0
BP	GO:0030003	cellular cation homeostasis	360	0.0154476	53	0.568264	60	0.444979	23	0.71992	32	1	3	1	0	1	25	0.140721	54	1	21	0.0982751	47	1	2	1	2	1	20	0.241161	43	1	12	0.287691	26	1	0	1	0
BP	GO:0030007	cellular potassium ion homeostasis	22	1	0	0.0287577	9	1	0	1	2	1	0	1	0	1	1	0.000280042	11	1	0	1	3	1	0	1	0	1	0	0.00854709	8	1	0	1	2	1	0	1	0
BP	GO:0030010	establishment of cell polarity	8	1	0	1	0	1	0	1	0	1	0	1	0	1	0	1	0	1	0	1	0	1	0	1	0	1	0	1	0	1	0	1	0	1	0	1	0
BP	GO:0030026	cellular manganese ion homeostasis	14	1	1	0.265144	5	1	0	1	1	1	0	1	0	1	0	1	2	1	0	1	1	0.0701766	2	1	0	1	0	1	2	1	0	1	1	1	0	1	0
BP	GO:0030029	actin filament-based process	9	1	2	1	0	1	1	1	0	1	0	1	0	0.849485	2	1	0	1	1	1	0	1	0	1	0	0.671845	2	1	0	1	1	1	0	1	0	1	0
BP	GO:0030036	actin cytoskeleton organization	50	1	2	0.293836	12	1	0	0.497974	7	1	0	1	0	1	2	1	7	1	3	0.531673	8	1	0	1	1	1	1	0.830131	7	1	0	0.138369	7	1	0	1	0
BP	GO:0030041	actin filament polymerization	17	1	0	1	1	1	0	1	0	1	0	1	0	1	0	1	3	1	0	1	1	1	0	1	0	1	0	1	1	1	0	1	0	1	0	1	0
BP	GO:0030042	actin filament depolymerization	8	1	0	1	1	1	0	1	0	1	0	1	0	1	0	1	0	1	0	1	0	1	0	1	0	1	0	1	0	1	0	1	0	1	0	1	0
BP	GO:0030048	actin filament-based movement	186	1	11	0.00415096	45	1	1	0.00775362	27	1	2	1	1	1	6	0.0652213	33	1	5	1	20	1	0	1	0	1	4	0.138109	26	1	1	0.209193	16	1	0	1	0
BP	GO:0030104	water homeostasis	10	1	0	0.717693	3	1	0	0.877708	2	1	0	1	0	1	0	0.03902	5	1	0	1	2	1	0	1	0	1	0	0.366556	3	1	0	0.633393	2	1	0	1	0
BP	GO:0030148	sphingolipid biosynthetic process	27	1	1	1	2	1	0	1	0	1	0	1	0	1	0	1	1	1	1	1	0	1	0	1	0	1	0	1	1	1	0	1	0	1	0	1	0
BP	GO:0030149	sphingolipid catabolic process	2	1	0	1	0	1	0	1	0	1	0	1	0	1	0	1	0	1	0	1	0	1	0	1	0	1	0	1	0	1	0	1	0	1	0	1	0
BP	GO:0030154	cell differentiation	432	6.70578e-05	72	1	55	0.129086	30	1	20	1	1	1	1	0.218927	40	1	36	0.873634	28	1	34	1	1	1	1	0.037633	38	1	29	1	17	1	15	1	0	1	0
BP	GO:0030155	regulation of cell adhesion	2	1	0	0.157942	2	1	0	0.802657	1	1	0	1	0	1	0	0.922643	1	1	0	1	0	1	0	1	0	1	0	0.850511	1	1	0	1	0	1	0	1	0
BP	GO:0030162	regulation of proteolysis	13	1	2	1	3	1	1	1	0	1	0	1	0	1	1	1	2	1	2	1	0	1	0	1	0	1	1	1	2	1	1	1	0	1	0	1	0
BP	GO:0030163	protein catabolic process	64	1	4	1	6	1	1	1	4	1	0	1	0	1	3	1	3	1	1	1	0	1	0	1	0	1	3	1	3	1	1	1	0	1	0	1	0
BP	GO:0030198	extracellular matrix organization	5	1	0	0.170437	3	1	0	1	1	1	0	1	0	1	0	0.01388	4	1	0	1	1	1	0	1	0	1	0	0.0769388	3	1	0	1	1	1	0	1	0
BP	GO:0030243	cellulose metabolic process	125	1	2	0.00238611	34	1	2	0.71992	13	1	0	1	1	1	3	1	12	1	4	1	13	1	0	1	0	1	2	1	11	1	1	0.936917	9	1	0	1	0
BP	GO:0030244	cellulose biosynthetic process	291	1	10	1	40	1	7	1	15	1	1	1	0	1	9	1	21	1	7	1	15	1	0	1	1	1	7	1	18	1	5	1	10	1	0	1	0
BP	GO:0030261	chromosome condensation	2	1	0	0.157942	2	1	0	0.802657	1	1	0	1	0	1	0	0.11967	2	1	0	0.836012	1	1	0	1	0	1	0	0.0902099	2	1	0	0.665369	1	1	0	1	0
BP	GO:0030307	positive regulation of cell growth	10	1	0	1	1	1	0	1	1	1	0	1	0	1	0	1	1	1	0	1	1	1	0	1	0	1	0	1	1	1	0	1	1	1	0	1	0
BP	GO:0030308	negative regulation of cell growth	12	1	2	1	1	1	0	1	0	1	0	1	0	1	0	1	0	1	1	1	1	1	0	1	0	1	0	1	0	1	0	1	0	1	0	1	0
BP	GO:0030327	prenylated protein catabolic process	2	1	0	1	0	1	0	1	0	1	0	1	0	1	0	1	0	0.926819	1	1	0	1	0	1	0	1	0	1	0	1	0	1	0	1	0	1	0
BP	GO:0030388	fructose 1,6-bisphosphate metabolic process	11	1	2	1	0	1	0	1	0	1	0	1	0	1	1	1	0	1	0	1	2	1	0	1	0	1	1	1	0	1	0	1	0	1	0	1	0
BP	GO:0030397	membrane disassembly	2	0.979073	1	1	0	1	0	1	0	1	0	1	0	1	0	1	0	1	0	0.836012	1	1	0	1	0	1	0	1	0	1	0	1	0	1	0	1	0
BP	GO:0030418	nicotianamine biosynthetic process	10	1	0	0.000154253	8	1	0	0.000813231	6	1	0	0.192287	2	1	0	0.00640821	6	1	0	3.17742e-07	9	1	0	1	0	1	0	0.00204547	6	1	0	0.00014226	6	1	0	1	0
BP	GO:0030422	production of siRNA involved in RNA interference	128	1	13	1	8	1	4	1	2	1	0	0.0229305	7	1	6	1	4	1	2	1	0	1	0	1	0	1	5	1	4	1	2	1	0	1	0	1	0
BP	GO:0030433	ubiquitin-dependent ERAD pathway	23	1	1	1	1	1	0	1	0	1	1	1	0	1	1	1	0	1	0	1	0	1	0	1	0	1	1	1	0	1	0	1	0	1	0	1	0
BP	GO:0030497	fatty acid elongation	18	1	0	0.000154417	11	1	0	0.802657	3	1	0	1	0	1	0	2.17956e-05	11	1	0	0.0585356	6	1	0	1	0	1	0	2.81601e-05	10	1	0	0.457844	3	1	0	1	0
BP	GO:0030581	symbiont intracellular protein transport in host	5	1	0	1	0	1	0	1	0	1	0	1	0	1	0	1	0	1	0	1	0	1	0	1	0	1	0	1	0	1	0	1	0	1	0	1	0
BP	GO:0030643	cellular phosphate ion homeostasis	12	1	0	1	2	0.889952	2	1	0	1	0	1	0	1	0	1	1	1	2	1	1	1	0	1	0	1	0	1	1	0.653382	2	1	0	1	0	1	0
BP	GO:0030833	regulation of actin filament polymerization	8	1	1	0.51809	3	1	0	0.71992	2	1	0	1	0	1	1	0.949169	2	1	1	0.830673	2	1	0	1	0	1	1	0.830378	2	1	0	0.457844	2	1	0	1	0
BP	GO:0030834	regulation of actin filament depolymerization	4	1	1	0.102204	3	1	0	0.273715	2	1	0	1	0	1	1	0.409995	2	1	1	0.337837	2	1	0	1	0	1	1	0.305813	2	1	0	0.164787	2	1	0	1	0
BP	GO:0030835	negative regulation of actin filament depolymerization	16	1	0	1	2	1	0	1	1	1	0	1	0	1	0	1	2	1	0	1	2	1	0	1	0	1	0	1	2	1	0	1	1	1	0	1	0
BP	GO:0030865	cortical cytoskeleton organization	15	1	0	1	1	1	0	1	1	1	0	1	0	1	0	1	2	1	0	1	1	1	0	1	0	1	0	1	1	1	0	1	1	1	0	1	0
BP	GO:0030968	endoplasmic reticulum unfolded protein response	714	3.89083e-11	129	1	53	0.00140681	54	1	23	1	5	1	0	6.89895e-14	107	1	52	2.77616e-05	67	1	31	1	2	1	1	1.97283e-10	85	1	40	0.00014712	44	1	15	1	2	1	0
BP	GO:0030974	thiamine pyrophosphate transmembrane transport	4	0.0512043	3	1	0	1	0	1	0	1	0	1	1	0.268236	2	1	0	1	1	1	0	1	0	1	0	0.212717	2	1	0	1	0	1	0	1	0	1	0
BP	GO:0031047	gene silencing by RNA	277	1	6	0.000355726	66	1	2	1	16	1	0	1	0	1	5	0.00938851	50	1	3	0.00153193	46	1	1	1	1	1	5	0.00574446	43	1	1	1	13	1	0	1	0
BP	GO:0031048	chromatin silencing by small RNA	333	1	19	2.17527e-05	81	1	8	0.802657	29	1	0	1	1	1	11	0.0311181	55	1	6	0.000198798	56	1	0	1	2	1	11	0.00464046	50	1	4	0.32708	24	1	0	1	0
BP	GO:0031053	primary miRNA processing	10	1	0	1	0	1	0	1	0	1	0	1	0	1	0	1	1	1	0	1	0	1	0	1	0	1	0	1	0	1	0	1	0	1	0	1	0
BP	GO:0031054	pre-miRNA processing	5	1	0	1	1	1	0	1	1	1	0	1	0	1	0	1	1	1	0	1	1	1	0	1	0	1	0	1	1	1	0	1	1	1	0	1	0
BP	GO:0031060	regulation of histone methylation	2	1	0	1	0	1	0	1	0	1	0	1	0	1	0	1	0	1	0	1	0	1	0	1	0	1	0	1	0	1	0	1	0	1	0	1	0
BP	GO:0031062	positive regulation of histone methylation	2	0.11299	2	1	0	0.871675	1	1	0	1	0	1	0	0.088348	2	1	0	0.0674776	2	1	0	1	0	1	0	0.0630082	2	1	0	0.766787	1	1	0	1	0	1	0
BP	GO:0031063	regulation of histone deacetylation	2	1	0	1	0	1	0	1	0	1	0	1	0	0.898895	1	1	0	0.926819	1	1	0	1	0	1	0	1	0	1	0	1	0	1	0	1	0	1	0
BP	GO:0031087	deadenylation-independent decapping of nuclear-transcribed mRNA	21	1	0	1	1	1	0	1	1	1	0	1	0	1	0	1	1	1	0	1	0	1	0	1	0	1	0	1	0	1	0	1	0	1	0	1	0
BP	GO:0031110	regulation of microtubule polymerization or depolymerization	2	1	0	0.982512	1	1	0	0.802657	1	1	0	1	0	1	0	1	0	1	0	1	0	1	0	1	0	1	0	1	0	1	0	1	0	1	0	1	0
BP	GO:0031115	negative regulation of microtubule polymerization	9	1	1	1	2	1	1	0.802657	2	1	0	1	0	1	0	1	2	1	1	1	1	1	0	1	0	1	0	0.904099	2	1	1	1	1	1	0	1	0
BP	GO:0031116	positive regulation of microtubule polymerization	8	1	0	1	0	1	0	1	0	1	0	1	0	1	0	1	0	1	0	1	0	1	0	1	0	1	0	1	0	1	0	1	0	1	0	1	0
BP	GO:0031117	positive regulation of microtubule depolymerization	12	1	1	1	1	1	1	1	1	1	0	1	0	1	0	1	1	1	1	1	0	1	0	1	0	1	0	1	1	1	1	1	0	1	0	1	0
BP	GO:0031122	cytoplasmic microtubule organization	5	1	0	1	0	1	0	1	1	1	0	1	0	1	0	1	0	1	0	1	0	1	0	1	0	1	0	1	0	1	0	1	0	1	0	1	0
BP	GO:0031123	RNA 3'-end processing	8	1	0	1	0	1	0	1	0	1	0	1	0	1	0	1	0	1	0	1	0	1	0	1	0	1	0	1	0	1	0	1	0	1	0	1	0
BP	GO:0031125	rRNA 3'-end processing	4	1	0	1	1	1	0	1	0	1	0	0.0424642	2	1	0	1	0	1	0	1	0	1	0	1	0	1	0	1	0	1	0	1	0	1	0	1	0
BP	GO:0031129	inductive cell-cell signaling	2	1	0	1	0	1	0	1	0	1	0	1	0	1	0	1	0	1	0	1	0	1	0	1	0	1	0	1	0	1	0	1	0	1	0	1	0
BP	GO:0031146	SCF-dependent proteasomal ubiquitin-dependent protein catabolic process	14	1	2	1	1	1	1	1	0	1	0	1	0	1	1	1	1	1	2	1	1	1	0	1	0	1	1	1	1	1	1	1	0	1	0	1	0
BP	GO:0031204	posttranslational protein targeting to membrane, translocation	3	1	0	1	0	1	0	1	0	1	0	1	0	1	0	1	0	1	0	1	0	1	0	1	0	1	0	1	0	1	0	1	0	1	0	1	0
BP	GO:0031222	arabinan catabolic process	2	1	0	1	0	1	0	1	0	1	0	1	0	1	0	1	0	1	0	1	0	1	0	1	0	1	0	1	0	1	0	1	0	1	0	1	0
BP	GO:0031347	regulation of defense response	354	7.37186e-06	65	1	32	0.0199927	29	1	8	1	3	1	0	0.00776492	41	1	28	6.95956e-05	40	1	12	1	1	1	1	0.0159456	34	1	22	0.0481651	21	1	5	1	0	1	0
BP	GO:0031348	negative regulation of defense response	981	1.44175e-11	165	1	74	0.209999	56	1	39	1	5	1	0	3.73334e-14	134	1	64	7.46008e-06	87	1	52	1	4	1	1	6.42721e-09	101	1	50	0.198511	41	1	26	1	0	1	0
BP	GO:0031349	positive regulation of defense response	11	1	1	1	0	1	0	1	0	1	0	1	0	1	1	1	0	1	0	1	0	1	0	1	0	1	1	1	0	1	0	1	0	1	0	1	0
BP	GO:0031365	N-terminal protein amino acid modification	14	1	1	1	0	1	1	1	1	1	0	1	0	1	0	1	0	1	2	1	0	1	1	1	0	1	0	1	0	1	1	1	0	1	0	1	0
BP	GO:0031396	regulation of protein ubiquitination	4	1	1	1	0	1	0	1	0	1	0	1	0	1	1	1	0	1	0	1	0	1	0	1	0	1	1	1	0	1	0	1	0	1	0	1	0
BP	GO:0031407	oxylipin metabolic process	13	1	2	1	2	1	1	1	1	1	1	1	0	1	2	1	2	1	1	1	2	1	0	1	0	1	1	1	2	1	1	1	1	1	0	1	0
BP	GO:0031408	oxylipin biosynthetic process	68	1	5	1	9	1	2	1	3	1	0	1	0	1	2	0.951077	10	1	3	0.836012	9	1	0	1	1	1	2	1	6	1	1	1	2	1	0	1	0
BP	GO:0031425	chloroplast RNA processing	26	0.645106	5	1	0	1	2	1	1	1	0	1	0	0.704301	4	1	0	1	3	1	0	1	0	1	0	1	3	1	0	1	2	1	0	1	0	1	0
BP	GO:0031426	polycistronic mRNA processing	1	1	0	1	0	1	0	1	0	1	0	1	0	1	0	1	0	1	0	1	0	1	0	1	0	1	0	1	0	1	0	1	0	1	0	1	0
BP	GO:0031507	heterochromatin assembly	48	1	6	0.419663	11	1	1	1	2	1	0	1	1	1	0	1	3	1	0	1	3	1	0	1	0	1	0	1	3	1	0	1	2	1	0	1	0
BP	GO:0031508	pericentric heterochromatin assembly	3	1	0	1	0	1	0	1	0	1	0	1	0	1	0	1	0	1	0	1	0	1	0	1	0	1	0	1	0	1	0	1	0	1	0	1	0
BP	GO:0031537	regulation of anthocyanin metabolic process	49	0.609386	8	1	1	1	4	1	2	1	2	1	2	1	5	1	1	1	3	0.830673	7	1	0	1	1	1	4	1	1	1	2	1	2	1	0	1	1
BP	GO:0031538	negative regulation of anthocyanin metabolic process	7	1	1	1	1	1	0	1	0	1	0	1	0	1	1	1	1	1	1	1	1	1	0	1	0	1	1	1	1	1	0	1	0	1	0	1	0
BP	GO:0031539	positive regulation of anthocyanin metabolic process	8	0.0618777	4	1	1	1	0	1	0	1	0	1	0	0.0280948	4	1	0	1	0	1	0	1	0	1	0	0.0152242	4	1	0	1	0	1	0	1	0	1	0
BP	GO:0031540	regulation of anthocyanin biosynthetic process	19	1	0	1	3	1	0	1	1	1	0	1	0	1	0	1	1	1	2	1	1	1	0	1	0	1	0	1	1	1	0	1	0	1	0	1	0
BP	GO:0031564	transcription antitermination	6	1	0	1	1	1	0	1	0	1	0	1	0	1	0	1	1	1	0	1	0	1	0	1	0	1	0	1	1	1	0	1	0	1	0	1	0
BP	GO:0031567	mitotic cell size control checkpoint	4	1	0	0.51809	2	1	0	1	0	1	0	1	0	1	0	1	1	1	0	1	1	1	0	1	0	1	0	1	1	1	0	1	0	1	0	1	0
BP	GO:0031591	wybutosine biosynthetic process	2	1	0	1	0	1	0	1	0	1	0	1	0	1	0	1	0	1	0	1	0	1	0	1	0	1	0	1	0	1	0	1	0	1	0	1	0
BP	GO:0031669	cellular response to nutrient levels	13	1	0	1	0	1	0	1	0	1	0	1	0	1	0	1	0	1	1	1	0	1	0	1	0	1	0	1	0	1	0	1	0	1	0	1	0
BP	GO:0031930	mitochondria-nucleus signaling pathway	8	1	0	1	1	1	0	0.71992	2	1	0	1	0	1	1	1	0	1	0	0.830673	2	1	0	1	0	1	0	1	0	1	0	0.457844	2	1	0	1	0
BP	GO:0031935	regulation of chromatin silencing	7	1	0	1	0	1	0	1	0	1	0	1	0	1	0	1	0	1	0	1	0	1	0	1	0	1	0	1	0	1	0	1	0	1	0	1	0
BP	GO:0031936	negative regulation of chromatin silencing	2	1	0	1	0	1	0	1	0	1	0	1	0	1	0	1	0	1	0	1	0	1	0	1	0	1	0	1	0	1	0	1	0	1	0	1	0
BP	GO:0031998	regulation of fatty acid beta-oxidation	10	1	0	1	1	1	0	1	0	1	0	1	0	1	0	1	0	1	0	1	0	1	0	1	0	1	0	1	0	1	0	1	0	1	0	1	0
BP	GO:0032025	response to cobalt ion	11	1	0	0.843331	3	1	0	0.99031	2	1	0	1	0	1	0	1	2	1	0	1	2	1	0	1	0	1	0	1	2	1	0	0.665369	2	1	0	1	0
BP	GO:0032042	mitochondrial DNA metabolic process	2	1	0	1	0	1	0	1	0	1	0	1	0	1	0	1	0	1	0	1	0	1	0	1	0	1	0	1	0	1	0	1	0	1	0	1	0
BP	GO:0032091	negative regulation of protein binding	2	1	0	0.982512	1	1	0	1	0	1	0	1	0	1	0	0.922643	1	1	0	1	0	1	0	1	0	1	0	0.850511	1	1	0	1	0	1	0	1	0
BP	GO:0032107	regulation of response to nutrient levels	4	0.0512043	3	1	0	0.209999	2	1	0	1	0	1	0	1	1	1	0	1	1	1	0	1	0	1	0	1	1	1	0	1	1	1	0	1	0	1	0
BP	GO:0032119	sequestering of zinc ion	13	1	0	1	0	1	0	1	0	1	0	1	0	1	0	1	0	1	1	1	0	1	0	1	0	1	0	1	0	1	0	1	0	1	0	1	0
BP	GO:0032197	transposition, RNA-mediated	6	1	0	0.273916	3	1	0	0.499996	2	1	0	1	0	1	0	0.180359	3	1	0	0.129114	3	1	0	1	0	1	0	0.117432	3	1	0	0.303667	2	1	0	1	0
BP	GO:0032204	regulation of telomere maintenance	117	1	5	1	18	1	0	1	2	1	0	1	0	1	3	1	6	1	2	1	5	1	0	1	0	1	3	1	6	1	0	1	1	1	0	1	0
BP	GO:0032206	positive regulation of telomere maintenance	2	1	0	0.157942	2	1	0	1	0	1	0	1	0	1	0	1	0	1	0	1	0	1	0	1	0	1	0	1	0	1	0	1	0	1	0	1	0
BP	GO:0032211	negative regulation of telomere maintenance via telomerase	5	0.54172	2	1	0	1	0	1	0	1	0	1	0	1	0	1	0	1	0	1	0	1	0	1	0	1	0	1	0	1	0	1	0	1	0	1	0
BP	GO:0032212	positive regulation of telomere maintenance via telomerase	2	1	0	0.157942	2	1	0	1	0	1	0	1	0	1	0	1	0	1	0	1	0	1	0	1	0	1	0	1	0	1	0	1	0	1	0	1	0
BP	GO:0032260	response to jasmonic acid stimulus involved in jasmonic acid and ethylene-dependent systemic resistance	6	1	0	0.273916	3	1	0	1	1	1	0	1	0	1	0	0.695989	2	1	0	0.582852	2	1	0	1	0	1	0	1	1	1	0	1	1	1	0	1	0
BP	GO:0032263	GMP salvage	2	1	0	1	0	1	0	1	0	1	0	1	0	1	0	1	0	1	0	1	0	1	0	1	0	1	0	1	0	1	0	1	0	1	0	1	0
BP	GO:0032264	IMP salvage	2	1	0	1	0	1	0	1	0	1	0	1	0	1	0	1	0	1	0	1	0	1	0	1	0	1	0	1	0	1	0	1	0	1	0	1	0
BP	GO:0032268	regulation of cellular protein metabolic process	5	0.000279434	5	1	0	1	0	0.000102831	5	1	0	1	0	6.24541e-05	5	1	0	1	0	1	0	1	0	1	0	2.52329e-05	5	1	0	1	0	1	0	1	0	1	0
BP	GO:0032350	regulation of hormone metabolic process	4	1	0	1	0	1	0	1	0	1	0	1	0	1	0	1	0	1	0	1	0	1	0	1	0	1	0	1	0	1	0	1	0	1	0	1	0
BP	GO:0032365	intracellular lipid transport	6	1	0	1	0	1	0	1	0	1	0	1	0	1	0	1	0	1	0	1	0	1	0	1	0	1	0	1	0	1	0	1	0	1	0	1	0
BP	GO:0032456	endocytic recycling	10	1	0	1	1	1	0	1	0	1	0	1	0	1	0	1	0	1	0	1	0	1	0	1	0	1	0	1	0	1	0	1	0	1	0	1	0
BP	GO:0032467	positive regulation of cytokinesis	6	1	0	1	0	1	0	1	1	1	0	1	0	1	0	0.695989	2	1	0	1	1	1	0	1	0	1	0	1	0	1	0	1	1	1	0	1	0
BP	GO:0032491	detection of molecule of fungal origin	2	1	0	1	0	1	0	1	0	1	0	1	0	1	0	1	0	1	0	1	0	1	0	1	0	1	0	1	0	1	0	1	0	1	0	1	0
BP	GO:0032499	detection of peptidoglycan	2	1	0	1	0	1	0	1	0	1	0	1	0	1	0	1	0	1	0	1	0	1	0	1	0	1	0	1	0	1	0	1	0	1	0	1	0
BP	GO:0032502	developmental process	74	1	8	1	5	1	1	1	5	1	3	1	1	1	5	1	7	1	2	1	5	1	0	0.330244	4	1	5	1	5	1	1	1	3	1	0	1	1
BP	GO:0032504	multicellular organism reproduction	62	1	3	1	10	1	0	1	1	1	0	1	0	1	2	1	3	1	1	1	3	1	0	1	0	1	2	1	3	1	0	1	0	1	0	1	0
BP	GO:0032508	DNA duplex unwinding	21	0.0408956	7	1	4	0.711533	3	1	2	1	0	1	0	1	2	0.922643	4	0.311239	4	1	0	1	0	1	1	1	2	1	3	0.366083	3	1	0	1	0	1	0
BP	GO:0032509	endosome transport via multivesicular body sorting pathway	10	1	0	1	0	1	1	1	0	1	0	1	0	1	0	1	0	1	0	1	0	1	0	1	0	1	0	1	0	1	0	1	0	1	0	1	0
BP	GO:0032515	negative regulation of phosphoprotein phosphatase activity	3	1	0	1	0	1	0	1	0	1	0	1	0	1	0	1	0	1	0	1	0	1	0	1	0	1	0	1	0	1	0	1	0	1	0	1	0
BP	GO:0032527	protein exit from endoplasmic reticulum	16	0.15562	5	1	0	0.44478	3	1	0	1	0	1	0	0.0664051	5	1	0	0.546721	3	1	1	1	0	1	0	0.142793	4	1	0	0.215378	3	1	0	1	0	1	0
BP	GO:0032544	plastid translation	37	1	3	1	4	1	0	1	2	1	1	1	0	1	0	1	3	1	0	0.352954	7	1	0	1	0	1	0	1	2	1	0	1	2	1	0	1	0
BP	GO:0032776	DNA methylation on cytosine	5	1	0	1	1	1	0	1	1	1	0	1	0	1	0	1	0	1	0	1	0	1	0	1	0	1	0	1	0	1	0	1	0	1	0	1	0
BP	GO:0032784	regulation of DNA-templated transcription, elongation	4	1	0	1	1	1	0	1	0	1	0	1	0	1	0	1	1	1	0	1	1	1	0	1	0	1	0	1	1	1	0	1	0	1	0	1	0
BP	GO:0032875	regulation of DNA endoreduplication	52	1	2	0.57787	11	1	0	1	4	1	0	1	0	1	1	0.409995	10	1	0	0.905322	7	1	1	1	0	1	1	0.146537	10	1	0	1	3	1	0	1	0
BP	GO:0032876	negative regulation of DNA endoreduplication	21	1	0	0.747737	5	1	0	1	1	1	0	1	0	1	0	1	2	1	1	1	1	1	0	1	0	1	0	1	2	1	0	1	1	1	0	1	0
BP	GO:0032877	positive regulation of DNA endoreduplication	13	1	0	0.523339	4	1	0	1	2	1	0	1	0	1	0	0.34977	4	1	0	0.626039	3	1	0	1	0	1	0	0.202889	4	1	0	0.852205	2	1	0	1	0
BP	GO:0032880	regulation of protein localization	146	1	13	1	20	1	8	1	8	1	1	1	0	1	8	1	17	1	5	1	10	1	2	1	2	1	8	1	13	1	4	1	7	1	0	1	0
BP	GO:0032922	circadian regulation of gene expression	18	1	3	1	0	1	0	1	0	1	0	1	0	1	2	1	1	1	1	1	0	1	0	1	0	1	2	1	0	1	0	1	0	1	0	1	0
BP	GO:0032928	regulation of superoxide anion generation	2	1	0	0.982512	1	1	0	0.802657	1	1	0	1	0	1	0	0.922643	1	1	0	0.0982751	2	1	0	1	0	1	0	0.850511	1	1	0	0.665369	1	1	0	1	0
BP	GO:0032940	secretion by cell	10	1	2	1	0	0.743964	2	1	0	1	0	1	0	0.923128	2	1	0	0.873634	2	1	0	1	0	1	0	0.7427	2	1	0	0.499029	2	1	0	1	0	1	0
BP	GO:0032953	regulation of (1->3)-beta-D-glucan biosynthetic process	6	1	1	1	0	1	1	1	0	1	0	1	0	1	0	1	0	1	1	1	0	1	0	1	0	1	0	1	0	1	0	1	0	1	0	1	0
BP	GO:0032957	inositol trisphosphate metabolic process	69	1	4	1	5	1	0	1	5	1	1	1	0	1	5	1	4	1	0	1	4	1	0	1	0	1	3	1	4	1	0	1	3	1	0	1	0
BP	GO:0032960	regulation of inositol trisphosphate biosynthetic process	4	1	0	1	0	1	0	1	0	1	0	1	0	1	0	1	0	1	0	1	0	1	0	1	0	1	0	1	0	1	0	1	0	1	0	1	0
BP	GO:0032973	amino acid export across plasma membrane	4	1	0	0.00671449	4	1	0	1	0	1	0	1	0	1	0	1	0	1	0	1	0	1	0	1	0	1	0	1	0	1	0	1	0	1	0	1	0
BP	GO:0032981	mitochondrial respiratory chain complex I assembly	2	0.979073	1	1	0	0.871675	1	1	0	1	0	1	0	0.898895	1	1	0	0.926819	1	1	0	1	0	1	0	0.772216	1	1	0	1	0	1	0	1	0	1	0
BP	GO:0033014	tetrapyrrole biosynthetic process	15	0.948753	3	1	0	0.403171	3	1	0	1	0	1	0	1	2	1	0	1	2	1	0	1	0	1	0	1	2	1	0	0.848344	2	1	0	1	0	1	0
BP	GO:0033043	regulation of organelle organization	54	1	0	1	3	1	0	1	1	1	0	1	0	1	0	1	3	1	0	1	2	1	0	1	0	1	0	1	3	1	0	1	1	1	0	1	0
BP	GO:0033044	regulation of chromosome organization	271	1	11	1	23	1	2	1	5	1	0	1	0	1	9	1	16	1	6	1	13	1	0	1	0	1	8	1	14	1	1	1	4	1	0	1	0
BP	GO:0033169	histone H3-K9 demethylation	6	1	0	1	1	1	1	1	1	1	0	1	0	1	0	1	0	1	0	1	0	1	0	1	0	1	0	1	0	1	0	1	0	1	0	1	0
BP	GO:0033198	response to ATP	4	1	0	1	1	1	0	1	0	1	0	1	0	1	0	1	1	1	0	1	1	1	0	1	0	1	0	1	1	1	0	1	0	1	0	1	0
BP	GO:0033234	negative regulation of protein sumoylation	4	1	0	1	0	1	0	1	0	1	0	1	0	1	0	1	0	1	0	1	0	1	0	1	0	1	0	1	0	1	0	1	0	1	0	1	0
BP	GO:0033259	plastid DNA replication	6	1	0	1	1	1	0	1	1	1	0	1	0	1	0	1	1	1	0	1	0	1	0	1	0	1	0	1	0	1	0	1	0	1	0	1	0
BP	GO:0033306	phytol metabolic process	6	1	0	0.845832	2	1	0	1	1	1	0	1	0	1	1	1	1	1	0	0.129114	3	1	0	1	0	1	0	1	1	1	0	1	1	1	0	1	0
BP	GO:0033345	asparagine catabolic process via L-aspartate	12	1	1	1	2	1	1	1	0	1	1	1	0	1	1	1	1	1	0	1	1	1	0	1	0	1	1	1	1	1	0	1	0	1	0	1	0
BP	GO:0033354	chlorophyll cycle	2	1	0	1	0	0.871675	1	1	0	1	0	1	0	1	0	1	0	0.926819	1	1	0	1	0	1	0	1	0	1	0	0.766787	1	1	0	1	0	1	0
BP	GO:0033356	UDP-L-arabinose metabolic process	13	1	0	0.00230681	8	1	0	0.133387	4	1	0	1	0	1	0	0.00495753	7	1	0	0.0619077	5	1	0	1	0	1	0	0.0101647	6	1	0	0.049062	4	1	0	1	0
BP	GO:0033365	protein localization to organelle	4	1	0	1	0	1	0	1	0	1	0	1	0	1	1	1	0	1	0	1	0	1	0	1	0	1	0	1	0	1	0	1	0	1	0	1	0
BP	GO:0033466	trans-zeatin biosynthetic process	5	1	0	1	0	1	0	1	0	1	0	1	0	1	0	0.11967	3	1	0	0.470499	2	1	0	1	0	1	0	1	0	1	0	1	0	1	0	1	0
BP	GO:0033468	CMP-keto-3-deoxy-D-manno-octulosonic acid biosynthetic process	4	1	0	1	1	1	0	1	0	1	0	1	0	1	0	1	0	1	0	1	0	1	0	1	0	1	0	1	0	1	0	1	0	1	0	1	0
BP	GO:0033473	indoleacetic acid conjugate metabolic process	3	1	0	1	1	1	0	1	1	1	0	1	0	1	0	1	1	1	0	1	1	1	0	1	0	1	0	1	1	1	0	1	0	1	0	1	0
BP	GO:0033494	ferulate metabolic process	2	1	0	1	0	1	0	1	0	1	0	1	0	1	0	1	0	1	0	1	0	1	0	1	0	1	0	1	0	1	0	1	0	1	0	1	0
BP	GO:0033500	carbohydrate homeostasis	13	1	2	1	2	0.9935	2	1	0	1	0	1	1	1	2	1	0	1	2	1	1	1	0	1	1	0.99561	2	1	0	0.73676	2	1	0	1	0	1	1
BP	GO:0033506	glucosinolate biosynthetic process from homomethionine	2	1	0	0.982512	1	1	0	0.802657	1	1	0	1	0	1	0	0.922643	1	1	0	0.836012	1	1	0	1	0	1	0	0.850511	1	1	0	0.665369	1	1	0	1	0
BP	GO:0033523	histone H2B ubiquitination	24	1	1	1	1	1	0	1	0	1	0	1	0	1	0	1	1	1	1	1	0	1	0	1	0	1	0	1	1	1	0	1	0	1	0	1	0
BP	GO:0033528	S-methylmethionine cycle	3	1	0	1	0	1	0	1	0	1	0	1	1	1	0	1	0	1	0	1	0	1	0	1	0	1	0	1	0	1	0	1	0	1	0	1	0
BP	GO:0033542	fatty acid beta-oxidation, unsaturated, even number	2	1	0	1	0	0.871675	1	1	0	1	0	1	0	1	0	1	0	1	0	1	0	1	0	1	0	1	0	1	0	1	0	1	0	1	0	1	0
BP	GO:0033587	shikimate biosynthetic process	8	1	0	1	1	1	0	1	0	1	0	1	0	1	0	1	0	1	0	1	0	1	0	1	0	1	0	1	0	1	0	1	0	1	0	1	0
BP	GO:0033591	response to L-ascorbic acid	9	1	1	1	2	1	0	0.802657	2	1	0	1	0	1	0	1	1	1	0	0.912388	2	1	0	1	0	1	0	1	1	1	0	0.550891	2	1	0	1	0
BP	GO:0033611	oxalate catabolic process	3	1	0	1	1	1	0	1	0	1	0	1	0	1	0	1	0	1	0	1	0	1	0	1	0	1	0	1	0	1	0	1	0	1	0	1	0
BP	GO:0033617	mitochondrial respiratory chain complex IV assembly	3	1	0	1	0	1	0	1	0	1	0	1	0	1	0	1	0	1	1	1	0	1	0	1	0	1	0	1	0	1	0	1	0	1	0	1	0
BP	GO:0033962	cytoplasmic mRNA processing body assembly	4	1	0	1	0	1	0	1	0	1	0	1	0	1	0	1	0	1	0	1	0	1	0	1	0	1	0	1	0	1	0	1	0	1	0	1	0
BP	GO:0034050	host programmed cell death induced by symbiont	5	1	0	0.170437	3	1	0	1	0	1	0	1	0	1	0	0.574338	2	1	0	1	0	1	0	1	0	1	0	0.438873	2	1	0	1	0	1	0	1	0
BP	GO:0034051	negative regulation of plant-type hypersensitive response	9	1	2	1	0	1	1	1	0	1	0	1	0	1	1	1	1	1	1	1	0	1	0	1	0	1	1	1	0	1	1	1	0	1	0	1	0
BP	GO:0034052	positive regulation of plant-type hypersensitive response	8	0.298573	3	1	0	0.594053	2	1	0	1	0	1	0	0.191058	3	1	0	0.671987	2	1	0	1	0	1	0	0.582956	2	1	0	0.363164	2	1	0	1	0	1	0
BP	GO:0034059	response to anoxia	6	3.48625e-05	6	1	0	1.09091e-06	6	1	0	1	0	1	0	5.05992e-06	6	1	0	1.74987e-06	6	1	0	1	0	1	0	1.64233e-06	6	1	0	1.00454e-07	6	1	0	1	0	1	0
BP	GO:0034089	establishment of meiotic sister chromatid cohesion	2	1	0	1	0	1	0	1	0	1	0	1	0	0.898895	1	1	0	1	0	1	0	1	0	1	0	1	0	1	0	1	0	1	0	1	0	1	0
BP	GO:0034090	maintenance of meiotic sister chromatid cohesion	1	1	0	1	0	1	0	1	0	1	0	1	0	1	0	1	0	1	0	1	0	1	0	1	0	1	0	1	0	1	0	1	0	1	0	1	0
BP	GO:0034196	acylglycerol transport	1	1	0	1	0	1	0	1	0	1	0	1	0	1	0	1	0	1	0	1	0	1	0	1	0	1	0	1	0	1	0	1	0	1	0	1	0
BP	GO:0034214	protein hexamerization	12	1	0	1	1	1	0	1	0	1	0	1	0	1	0	1	1	1	0	1	0	1	0	1	0	1	0	1	0	1	0	1	0	1	0	1	0
BP	GO:0034219	carbohydrate transmembrane transport	4	1	1	1	0	1	0	1	0	1	0	1	0	1	0	1	0	1	0	1	0	1	0	1	0	1	0	1	0	1	0	1	0	1	0	1	0
BP	GO:0034243	regulation of transcription elongation from RNA polymerase II promoter	4	1	0	1	0	1	0	1	0	1	0	1	0	1	0	1	0	1	0	1	0	1	0	1	0	1	0	1	0	1	0	1	0	1	0	1	0
BP	GO:0034263	positive regulation of autophagy in response to ER overload	2	1	0	1	0	1	0	1	0	1	0	1	0	1	0	1	0	1	0	1	0	1	0	1	0	1	0	1	0	1	0	1	0	1	0	1	0
BP	GO:0034389	lipid droplet organization	6	1	0	0.845832	2	1	0	1	0	1	0	1	0	1	0	0.695989	2	1	0	0.582852	2	1	0	1	0	1	0	0.554927	2	1	0	1	0	1	0	1	0
BP	GO:0034434	sterol esterification	5	1	1	0.170437	3	1	1	0.0524224	3	1	0	1	0	1	0	0.11967	3	1	0	0.0868169	3	1	0	1	0	1	0	0.0769388	3	1	0	0.0241333	3	1	0	1	0
BP	GO:0034440	lipid oxidation	19	0.27264	5	1	0	1	1	1	1	1	0	1	0	1	1	1	0	0.74402	3	0.567139	4	1	0	1	0	1	1	1	0	1	1	1	1	1	0	1	0
BP	GO:0034484	raffinose catabolic process	3	1	1	1	1	1	0	1	0	1	0	1	0	1	0	1	0	1	0	1	0	1	0	1	0	1	0	1	0	1	0	1	0	1	0	1	0
BP	GO:0034508	centromere complex assembly	6	1	0	1	0	1	0	1	0	1	0	1	0	1	0	1	0	1	0	1	0	1	0	1	0	1	0	1	0	1	0	1	0	1	0	1	0
BP	GO:0034599	cellular response to oxidative stress	31	1	4	1	4	1	2	1	1	1	0	1	0	1	1	1	2	1	3	1	1	1	0	1	0	1	1	1	2	1	2	1	0	1	0	1	0
BP	GO:0034605	cellular response to heat	47	0.000567957	15	1	0	1	2	1	3	1	0	1	0	5.83837e-05	14	1	0	0.169769	7	1	0	0.00161107	4	1	0	0.00502876	10	1	0	1	1	1	0	1	0	1	0
BP	GO:0034613	cellular protein localization	22	1	0	1	0	1	0	1	0	1	0	1	0	1	0	1	0	1	0	1	0	1	0	1	0	1	0	1	0	1	0	1	0	1	0	1	0
BP	GO:0034614	cellular response to reactive oxygen species	5	1	0	1	1	1	0	1	0	1	0	0.0576987	2	1	0	0.574338	2	1	0	1	0	1	0	1	0	1	0	1	1	1	0	1	0	1	0	1	0
BP	GO:0034620	cellular response to unfolded protein	6	1	1	1	0	1	1	0.499996	2	1	0	1	0	1	0	1	0	1	1	1	0	1	0	1	0	1	0	1	0	1	1	1	0	1	0	1	0
BP	GO:0034635	glutathione transport	6	1	1	0.845832	2	1	0	1	1	1	0	1	0	1	0	1	1	1	0	0.582852	2	1	0	1	0	1	0	1	1	1	0	1	1	1	0	1	0
BP	GO:0034660	ncRNA metabolic process	251	0.000696895	45	1	7	1	11	1	8	1	2	1	1	0.0841701	28	1	9	1	10	1	14	1	0	1	0	0.0432447	25	1	4	1	5	1	6	1	0	1	0
BP	GO:0034720	histone H3-K4 demethylation	2	1	0	1	0	1	0	1	0	1	0	1	0	1	0	1	0	1	0	1	0	1	0	1	0	1	0	1	0	1	0	1	0	1	0	1	0
BP	GO:0034755	iron ion transmembrane transport	4	1	0	0.51809	2	1	0	0.273715	2	1	0	1	0	1	0	0.409995	2	1	0	0.337837	2	1	0	1	0	1	0	0.305813	2	1	0	0.164787	2	1	0	1	0
BP	GO:0034756	regulation of iron ion transport	6	1	0	0.0580789	4	1	0	0.499996	2	1	0	1	0	1	0	1	1	1	0	1	1	1	0	1	0	1	0	1	1	1	0	1	1	1	0	1	0
BP	GO:0034757	negative regulation of iron ion transport	7	1	1	1	1	1	0	1	0	1	0	1	0	1	0	1	1	1	0	1	0	1	0	1	0	1	0	1	1	1	0	1	0	1	0	1	0
BP	GO:0034968	histone lysine methylation	296	1	5	1.56266e-20	110	1	3	0.381142	29	1	0	1	5	1	3	4.04938e-17	90	1	1	3.82491e-19	84	1	0	1	2	1	3	5.09336e-20	84	1	1	0.0467524	26	1	0	1	0
BP	GO:0034970	histone H3-R2 methylation	8	1	0	1	1	1	0	1	0	1	0	1	0	1	0	1	0	1	0	1	0	1	0	1	0	1	0	1	0	1	0	1	0	1	0	1	0
BP	GO:0034971	histone H3-R17 methylation	8	1	0	1	1	1	0	1	0	1	0	1	0	1	0	1	0	1	0	1	0	1	0	1	0	1	0	1	0	1	0	1	0	1	0	1	0
BP	GO:0034972	histone H3-R26 methylation	8	1	0	1	1	1	0	1	0	1	0	1	0	1	0	1	0	1	0	1	0	1	0	1	0	1	0	1	0	1	0	1	0	1	0	1	0
BP	GO:0034976	response to endoplasmic reticulum stress	597	1	53	0.730033	94	1	20	0.0261589	62	1	3	1	2	1	39	0.575043	77	1	26	1	53	1	0	1	2	1	30	0.366556	65	1	14	0.590678	37	1	0	1	1
BP	GO:0035019	somatic stem cell population maintenance	3	1	0	1	0	1	0	1	0	1	0	1	0	1	0	1	0	1	0	1	0	1	0	1	0	1	0	1	0	1	0	1	0	1	0	1	0
BP	GO:0035024	negative regulation of Rho protein signal transduction	2	1	0	0.157942	2	1	0	0.802657	1	1	0	1	0	1	0	0.11967	2	1	0	0.836012	1	1	0	1	0	1	0	0.0902099	2	1	0	0.665369	1	1	0	1	0
BP	GO:0035067	negative regulation of histone acetylation	6	1	0	1	0	1	0	1	0	1	0	1	0	1	0	1	0	1	0	1	0	1	0	1	0	1	0	1	0	1	0	1	0	1	0	1	0
BP	GO:0035194	posttranscriptional gene silencing by RNA	19	1	0	1	1	1	0	1	0	1	0	1	0	1	0	1	1	1	0	1	0	1	0	1	0	1	0	1	1	1	0	1	0	1	0	1	0
BP	GO:0035195	gene silencing by miRNA	15	1	1	1	0	1	1	1	0	1	0	1	0	1	1	1	0	1	1	1	1	1	0	1	0	1	1	1	0	1	1	1	0	1	0	1	0
BP	GO:0035196	production of miRNAs involved in gene silencing by miRNA	372	1	21	1	37	1	7	1	8	1	0	1	5	1	10	1	20	1	3	1	14	1	0	1	1	1	8	1	20	1	3	1	6	1	0	1	0
BP	GO:0035264	multicellular organism growth	5	0.54172	2	1	0	1	1	1	0	1	0	1	0	1	1	1	0	1	1	1	0	1	0	1	0	1	1	1	0	1	1	1	0	1	0	1	0
BP	GO:0035265	organ growth	34	0.0165118	10	1	6	0.0891858	6	1	4	1	0	1	0	0.00784696	9	1	4	0.873634	4	0.911708	5	1	0	1	0	0.00211748	9	1	4	0.290854	4	0.633393	4	1	0	1	0
BP	GO:0035266	meristem growth	8	1	0	1	0	1	0	1	0	1	0	1	1	1	0	1	0	1	0	1	0	1	0	1	0	1	0	1	0	1	0	1	0	1	0	1	0
BP	GO:0035278	miRNA mediated inhibition of translation	4	1	0	1	0	1	0	1	0	1	0	1	0	1	0	1	0	1	0	1	0	1	0	1	0	1	0	1	0	1	0	1	0	1	0	1	0
BP	GO:0035279	mRNA cleavage involved in gene silencing by miRNA	9	1	1	1	1	1	0	1	1	1	0	1	0	1	1	1	1	1	0	1	1	1	0	1	0	1	1	1	1	1	0	1	1	1	0	1	0
BP	GO:0035280	miRNA loading onto RISC involved in gene silencing by miRNA	6	1	0	0.00570189	5	1	0	0.00894345	4	1	0	1	1	1	0	0.00275238	5	1	0	0.0179159	4	1	0	1	0	1	0	0.000918586	5	1	0	0.00266412	4	1	0	1	0
BP	GO:0035281	pre-miRNA export from nucleus	3	1	0	1	1	1	0	1	0	1	0	1	0	1	0	1	0	1	0	1	0	1	0	1	0	1	0	1	0	1	0	1	0	1	0	1	0
BP	GO:0035304	regulation of protein dephosphorylation	486	0.000919549	74	1	36	1	23	1	19	1	3	1	0	0.369002	42	1	27	1	27	1	34	1	1	1	0	0.657689	33	1	21	1	11	1	14	1	0	1	0
BP	GO:0035335	peptidyl-tyrosine dephosphorylation	6	1	0	1	0	1	0	1	0	1	0	1	0	1	0	1	0	1	0	1	0	1	0	1	0	1	0	1	0	1	0	1	0	1	0	1	0
BP	GO:0035407	histone H3-T11 phosphorylation	2	1	0	1	0	1	0	1	0	1	0	1	0	1	0	1	0	1	0	1	0	1	0	1	0	1	0	1	0	1	0	1	0	1	0	1	0
BP	GO:0035434	copper ion transmembrane transport	4	0.377063	2	1	0	1	1	1	0	1	0	1	0	0.268236	2	1	0	0.249794	2	1	0	1	0	1	0	0.212717	2	1	0	1	1	1	0	1	0	1	0
BP	GO:0035436	triose phosphate transmembrane transport	16	1	1	0.389061	5	1	0	1	1	1	0	1	0	1	0	0.0716619	6	1	0	0.129114	5	1	0	1	0	1	0	0.112529	5	1	0	1	1	1	0	1	0
BP	GO:0035437	maintenance of protein localization in endoplasmic reticulum	2	1	0	1	0	1	0	1	0	1	0	1	0	1	0	1	0	1	0	1	0	1	0	1	0	1	0	1	0	1	0	1	0	1	0	1	0
BP	GO:0035556	intracellular signal transduction	490	1.30077e-20	121	1	20	8.06242e-08	53	1	11	1	1	1	0	2.18969e-24	104	1	18	9.72107e-13	69	1	8	1	1	1	0	4.12732e-18	82	1	12	1.43984e-10	47	1	5	1	0	1	0
BP	GO:0035672	oligopeptide transmembrane transport	6	0.15562	3	1	0	1	1	1	0	1	0	1	0	1	0	1	0	1	0	1	0	1	0	1	0	1	0	1	0	1	0	1	0	1	0	1	0
BP	GO:0035674	tricarboxylic acid transmembrane transport	6	1	0	0.845832	2	1	0	1	1	1	0	1	0	1	0	1	1	1	0	1	1	1	0	1	0	1	0	1	1	1	0	1	1	1	0	1	0
BP	GO:0035725	sodium ion transmembrane transport	67	1	8	0.178651	16	0.740309	6	1	6	1	0	1	0	1	2	0.657203	11	1	5	1	5	1	0	1	0	1	2	0.45978	10	1	4	1	3	1	0	1	0
BP	GO:0035825	homologous recombination	3	1	0	1	0	1	0	1	0	1	0	1	0	1	0	1	0	1	0	1	0	1	0	1	0	1	0	1	0	1	0	1	0	1	0	1	0
BP	GO:0035864	response to potassium ion	2	1	0	1	0	1	0	1	0	1	0	1	0	1	0	1	0	1	0	1	0	1	0	1	0	1	0	1	0	1	0	1	0	1	0	1	0
BP	GO:0035865	cellular response to potassium ion	10	1	1	0.717693	3	1	1	0.280681	3	1	0	1	0	1	0	0.550424	3	1	1	1	2	1	0	1	0	1	0	0.366556	3	1	1	0.633393	2	1	0	1	0
BP	GO:0035970	peptidyl-threonine dephosphorylation	2	1	0	1	0	1	0	0.802657	1	1	0	1	0	1	0	1	0	1	0	1	0	1	0	1	0	1	0	1	0	1	0	1	0	1	0	1	0
BP	GO:0036290	protein trans-autophosphorylation	2	1	0	0.157942	2	1	0	1	0	1	0	1	0	1	0	0.922643	1	1	0	1	0	1	0	1	0	1	0	0.850511	1	1	0	1	0	1	0	1	0
BP	GO:0036292	DNA rewinding	2	1	0	1	0	1	0	1	0	1	0	1	0	1	0	1	0	1	0	1	0	1	0	1	0	1	0	1	0	1	0	1	0	1	0	1	0
BP	GO:0040007	growth	200	1	15	8.85561e-13	72	1	4	0.0193104	27	1	1	1	4	1	10	9.68457e-09	55	1	10	1.22817e-05	42	1	0	1	2	1	10	9.39705e-09	48	1	2	0.00152813	24	1	0	1	1
BP	GO:0040008	regulation of growth	18	1	3	1	1	1	1	0.802657	3	1	0	1	0	0.83757	3	1	1	0.209022	4	0.497922	4	1	0	1	0	1	2	1	1	1	1	0.457844	3	1	0	1	0
BP	GO:0040009	regulation of growth rate	4	1	0	0.00671449	4	1	0	0.000964882	4	1	0	1	0	1	0	0.0652213	3	1	0	0.00193128	4	1	0	1	0	1	0	0.0396722	3	1	0	0.000288155	4	1	0	1	0
BP	GO:0040014	regulation of multicellular organism growth	12	1	0	1	0	1	0	1	0	1	0	1	0	1	0	1	0	1	0	1	0	1	0	1	0	1	0	1	0	1	0	1	0	1	0	1	0
BP	GO:0040019	positive regulation of embryonic development	7	1	0	1	0	1	1	1	0	1	0	1	0	1	1	1	0	0.562553	2	1	0	1	0	1	0	1	0	1	0	1	1	1	0	1	0	1	0
BP	GO:0040020	regulation of meiotic nuclear division	18	1	0	1	2	1	0	1	1	1	0	1	0	1	0	1	2	1	0	1	1	1	0	1	0	1	0	1	2	1	0	1	1	1	0	1	0
BP	GO:0040029	regulation of gene expression, epigenetic	53	1	4	1	2	1	2	1	0	1	0	1	0	1	3	1	1	1	2	1	0	1	0	1	0	1	3	1	1	1	1	1	0	1	0	1	0
BP	GO:0040034	regulation of development, heterochronic	14	1	1	1	0	1	1	1	0	1	0	1	0	1	1	1	0	1	1	1	0	1	0	1	0	1	1	1	0	1	1	1	0	1	0	1	0
BP	GO:0042023	DNA endoreduplication	346	1	14	0.00404733	74	1	3	1	20	1	1	1	0	1	8	0.02886	57	1	4	0.21553	43	1	1	1	0	1	8	0.00191521	53	1	2	1	17	1	0	1	0
BP	GO:0042127	regulation of cell proliferation	136	1	6	1.73497e-05	42	1	3	0.707755	14	1	0	1	1	1	4	8.8516e-07	39	1	1	0.00553004	26	1	1	1	0	1	3	3.6816e-06	33	1	1	0.825874	10	1	0	1	0
BP	GO:0042128	nitrate assimilation	36	0.384296	7	0.639769	8	0.743964	4	0.71992	5	1	0	1	0	0.295048	6	0.310604	8	0.00241737	9	0.613267	6	1	0	1	0	0.161897	6	0.294262	7	0.989552	3	0.665369	4	1	0	1	0
BP	GO:0042138	meiotic DNA double-strand break formation	187	1	10	1	26	1	0	1	4	1	0	1	0	1	8	1	16	1	5	1	10	1	0	1	1	1	6	1	14	1	0	1	3	1	0	1	0
BP	GO:0042147	retrograde transport, endosome to Golgi	18	1	0	1	0	1	0	1	0	1	0	1	0	1	1	1	0	1	0	1	0	1	0	1	0	1	0	1	0	1	0	1	0	1	0	1	0
BP	GO:0042149	cellular response to glucose starvation	6	1	0	1	0	1	0	1	0	1	0	1	0	1	0	1	0	1	0	1	0	1	0	1	0	1	0	1	0	1	0	1	0	1	0	1	0
BP	GO:0042176	regulation of protein catabolic process	5	1	0	1	0	1	0	1	0	1	0	1	0	1	0	1	0	1	0	1	0	1	0	1	0	1	0	1	0	1	0	1	0	1	0	1	0
BP	GO:0042177	negative regulation of protein catabolic process	4	0.377063	2	1	0	1	0	1	0	1	0	1	0	1	0	1	0	1	0	1	0	1	0	1	0	1	0	1	0	1	0	1	0	1	0	1	0
BP	GO:0042178	xenobiotic catabolic process	9	1	0	0.617837	3	0.685769	2	1	0	1	0	1	0	1	0	0.436063	3	1	1	1	1	1	0	1	0	1	0	0.904099	2	1	1	1	0	1	0	1	0
BP	GO:0042254	ribosome biogenesis	404	1	13	1	45	1	3	1	5	1	1	4.94091e-22	37	1	8	1	41	1	1	1	27	1	0	4.28988e-82	78	1	8	1	31	1	1	1	2	1	0	3.50089e-21	20
BP	GO:0042256	mature ribosome assembly	8	1	0	1	1	1	0	1	0	1	0	0.137346	2	1	0	1	1	1	0	1	1	1	0	1	1	1	0	1	1	1	0	1	0	1	0	1	1
BP	GO:0042273	ribosomal large subunit biogenesis	3	1	0	1	0	1	0	1	0	1	0	1	0	1	0	1	0	1	0	1	0	1	0	1	0	1	0	1	0	1	0	1	0	1	0	1	0
BP	GO:0042274	ribosomal small subunit biogenesis	30	1	0	1	4	1	0	1	0	1	0	6.32155e-05	6	1	0	1	2	1	0	1	0	1	0	2.63039e-05	6	1	0	1	1	1	0	1	0	1	0	0.00424937	3
BP	GO:0042276	error-prone translesion synthesis	5	1	0	0.170437	3	1	0	1	1	1	0	1	0	1	0	1	1	1	0	1	0	1	0	1	0	1	0	1	1	1	0	1	0	1	0	1	0
BP	GO:0042304	regulation of fatty acid biosynthetic process	2	1	0	0.157942	2	1	0	0.0743321	2	1	0	1	0	1	0	1	0	1	0	0.836012	1	1	0	1	0	1	0	1	0	1	0	0.665369	1	1	0	1	0
BP	GO:0042306	regulation of protein import into nucleus	9	1	0	1	1	1	0	1	0	1	0	1	0	1	0	1	0	1	0	1	0	1	0	1	0	1	0	1	0	1	0	1	0	1	0	1	0
BP	GO:0042325	regulation of phosphorylation	10	1	0	1	0	1	0	1	0	1	0	1	0	1	0	1	0	1	0	1	0	1	0	1	0	1	0	1	0	1	0	1	0	1	0	1	0
BP	GO:0042335	cuticle development	159	1	3	0.000967053	42	1	4	0.464021	17	1	1	1	0	1	2	2.54635e-05	40	1	2	0.740677	19	1	0	1	1	1	2	1.83442e-05	35	1	2	0.918253	11	1	0	1	0
BP	GO:0042343	indole glucosinolate metabolic process	23	0.0162871	8	1	3	0.284071	4	0.0685301	6	1	0	1	0	0.00237439	8	1	2	0.000540063	8	0.151546	6	1	0	1	0	0.00490202	7	1	1	0.110708	4	0.0724391	5	1	0	1	0
BP	GO:0042344	indole glucosinolate catabolic process	12	1	1	1	0	1	0	1	0	1	0	1	0	1	1	1	0	1	0	1	0	1	0	1	0	1	0	1	0	1	0	1	0	1	0	1	0
BP	GO:0042350	GDP-L-fucose biosynthetic process	2	1	0	1	0	1	0	1	0	1	0	1	0	1	0	1	0	1	0	1	0	1	0	1	0	1	0	1	0	1	0	1	0	1	0	1	0
BP	GO:0042351	'de novo' GDP-L-fucose biosynthetic process	6	1	1	0.273916	3	1	0	1	1	1	0	1	0	0.489154	2	0.180359	3	1	0	1	1	1	0	1	0	1	1	0.117432	3	1	0	1	1	1	0	1	0
BP	GO:0042352	GDP-L-fucose salvage	2	1	0	1	0	1	0	1	0	1	0	1	0	1	0	1	0	1	0	1	0	1	0	1	0	1	0	1	0	1	0	1	0	1	0	1	0
BP	GO:0042353	fucose biosynthetic process	4	1	0	1	0	1	0	1	0	1	0	1	0	1	0	1	0	1	0	1	0	1	0	1	0	1	0	1	0	1	0	1	0	1	0	1	0
BP	GO:0042362	fat-soluble vitamin biosynthetic process	2	1	0	1	0	1	0	1	0	1	0	1	0	1	0	1	0	1	0	1	0	1	0	1	0	1	0	1	0	1	0	1	0	1	0	1	0
BP	GO:0042371	vitamin K biosynthetic process	2	0.979073	1	1	0	0.871675	1	1	0	1	0	1	0	0.898895	1	0.922643	1	0.926819	1	1	0	1	0	1	0	0.772216	1	1	0	0.766787	1	1	0	1	0	1	0
BP	GO:0042372	phylloquinone biosynthetic process	31	0.502818	6	0.676823	7	1	1	1	2	1	0	1	0	0.932389	4	0.667187	6	1	3	1	2	1	0	1	0	0.671845	4	0.75948	5	1	0	1	1	1	0	1	0
BP	GO:0042391	regulation of membrane potential	2	1	0	1	0	1	0	1	0	1	0	1	0	1	0	1	0	1	0	1	0	1	0	1	0	1	0	1	0	1	0	1	0	1	0	1	0
BP	GO:0042398	cellular modified amino acid biosynthetic process	180	1	11	4.04546e-06	53	1	4	0.00949251	26	1	1	1	1	1	5	0.00248816	38	1	6	0.0526081	28	1	0	1	1	1	5	0.000278714	35	1	3	0.0265205	19	1	0	1	0
BP	GO:0042407	cristae formation	2	1	0	1	0	1	0	1	0	1	0	1	0	1	0	0.922643	1	1	0	0.836012	1	1	0	1	0	1	0	1	0	1	0	1	0	1	0	1	0
BP	GO:0042425	choline biosynthetic process	3	1	0	0.33767	2	1	0	1	1	1	0	1	0	1	0	0.264978	2	1	1	1	1	1	0	1	0	1	0	0.202751	2	1	0	0.887595	1	1	0	1	0
BP	GO:0042450	arginine biosynthetic process via ornithine	4	1	0	1	0	1	0	1	0	1	0	1	1	1	0	1	0	1	0	1	0	1	0	1	0	1	0	1	0	1	0	1	0	1	0	1	0
BP	GO:0042493	response to drug	4	1	0	0.00671449	4	1	0	1	1	1	0	1	0	1	0	0.00405303	4	1	0	0.0441787	3	1	0	1	0	1	0	0.00175547	4	1	0	1	1	1	0	1	0
BP	GO:0042538	hyperosmotic salinity response	548	6.03644e-07	94	1	52	0.843354	30	1	37	0.0430712	12	1	2	5.71531e-05	66	1	54	0.597678	36	1	52	1	2	1	2	0.00392091	50	1	33	0.266617	25	1	24	1	2	1	0
BP	GO:0042539	hypotonic salinity response	6	1	1	0.845832	2	1	1	1	0	1	0	1	0	0.489154	2	0.180359	3	1	0	1	1	1	0	1	0	1	1	0.554927	2	1	0	1	0	1	0	1	0
BP	GO:0042542	response to hydrogen peroxide	612	0.000124486	93	1	69	1	31	6.23703e-06	80	1	3	1	5	0.388713	51	1	66	0.541239	40	0.455861	67	1	0	1	2	0.10877	47	1	49	1	23	0.0194138	48	1	0	1	1
BP	GO:0042545	cell wall modification	215	1	3	0.00832498	49	1	0	0.280681	23	1	1	3.81365e-05	13	1	4	0.0410801	38	1	2	0.011952	35	1	0	3.53068e-13	20	1	2	0.0408236	32	1	0	0.195442	18	1	0	1.48977e-06	8
BP	GO:0042546	cell wall biogenesis	191	1	8	6.65988e-18	79	1	3	6.71901e-07	38	1	0	1	0	1	6	0.000217007	43	1	4	5.61586e-05	39	1	0	1	0	1	6	1.21123e-05	40	1	2	4.61096e-05	27	1	0	1	0
BP	GO:0042547	cell wall modification involved in multidimensional cell growth	8	1	0	0.156681	4	1	0	1	0	1	0	1	0	1	0	0.0139933	5	1	0	1	0	1	0	1	0	1	0	0.235509	3	1	0	1	0	1	0	1	0
BP	GO:0042548	regulation of photosynthesis, light reaction	2	0.11299	2	1	0	1	0	1	0	1	0	1	0	0.898895	1	1	0	1	0	1	0	1	0	1	0	0.772216	1	1	0	1	0	1	0	1	0	1	0
BP	GO:0042549	photosystem II stabilization	24	0.223256	6	1	0	1	0	1	0	1	0	1	0	1	1	1	1	1	1	1	1	1	0	1	0	1	0	1	0	1	0	1	0	1	0	1	0
BP	GO:0042550	photosystem I stabilization	10	1	2	1	1	1	0	1	1	1	0	1	0	1	1	1	2	1	0	1	1	1	0	1	1	1	1	1	1	1	0	1	0	1	0	1	0
BP	GO:0042554	superoxide anion generation	4	1	0	1	0	1	0	1	0	1	0	1	0	1	0	1	0	1	0	1	0	1	0	1	0	1	0	1	0	1	0	1	0	1	0	1	0
BP	GO:0042593	glucose homeostasis	9	1	1	1	2	1	0	0.802657	2	1	0	1	0	1	0	1	1	1	0	0.912388	2	1	0	1	0	1	0	1	1	1	0	0.550891	2	1	0	1	0
BP	GO:0042594	response to starvation	33	0.298573	7	1	0	1	2	1	0	1	0	1	0	1	4	1	2	0.351846	5	1	0	1	0	1	0	0.7427	4	1	0	1	2	1	0	1	0	1	0
BP	GO:0042631	cellular response to water deprivation	240	0.666627	29	1	19	1	7	1	6	1	5	1	0	1	16	1	17	1	5	1	12	1	0	1	0	1	13	1	10	1	3	1	3	1	0	1	0
BP	GO:0042726	flavin-containing compound metabolic process	4	1	0	0.51809	2	1	0	1	0	1	0	1	0	1	0	1	0	1	0	1	0	1	0	1	0	1	0	1	0	1	0	1	0	1	0	1	0
BP	GO:0042732	D-xylose metabolic process	124	1	11	1	17	1	2	1	6	1	0	1	0	1	5	1	15	1	1	1	5	1	0	1	0	1	5	1	10	1	1	1	3	1	0	1	0
BP	GO:0042742	defense response to bacterium	1368	0.0439789	160	1	147	1	58	1	79	1	6	1	8	0.00502498	123	1	125	0.0050915	98	1	113	1	1	1	7	0.10877	93	1	96	1	44	1	59	1	0	1	2
BP	GO:0042744	hydrogen peroxide catabolic process	273	0.176945	37	0.87092	44	1	16	3.18075e-06	46	1	1	1	1	0.339531	26	0.174283	42	1	16	2.97493e-05	51	1	0	1	3	0.222334	23	1	28	1	11	0.00112542	30	1	0	1	0
BP	GO:0042752	regulation of circadian rhythm	126	0.818436	16	1	10	0.163837	12	1	11	1	0	1	1	1	11	1	7	0.195312	13	1	12	1	0	1	0	1	9	1	7	0.459636	8	1	8	1	0	1	0
BP	GO:0042753	positive regulation of circadian rhythm	11	0.170032	4	1	1	1	1	1	0	1	0	1	0	0.088348	4	1	0	1	1	1	0	1	0	1	0	0.0490613	4	1	0	1	1	1	0	1	0	1	0
BP	GO:0042754	negative regulation of circadian rhythm	10	0.0227595	5	1	0	1	1	1	0	1	0	1	0	0.923128	2	1	0	1	0	1	1	1	0	1	0	0.7427	2	1	0	1	0	1	0	1	0	1	0
BP	GO:0042759	long-chain fatty acid biosynthetic process	5	1	1	1	0	1	0	1	0	1	0	1	0	1	0	1	0	1	0	1	0	1	0	1	0	1	0	1	0	1	0	1	0	1	0	1	0
BP	GO:0042761	very long-chain fatty acid biosynthetic process	35	1	5	0.33553	9	0.712605	4	1	1	1	1	1	0	1	4	1	5	1	3	1	3	1	0	1	0	1	3	0.938009	5	0.943178	3	1	1	1	0	1	0
BP	GO:0042762	regulation of sulfur metabolic process	3	1	0	1	0	1	0	1	0	1	0	1	0	1	0	1	0	1	0	1	0	1	0	1	0	1	0	1	0	1	0	1	0	1	0	1	0
BP	GO:0042775	mitochondrial ATP synthesis coupled electron transport	3	1	0	1	0	1	0	1	0	1	0	1	0	1	0	1	0	1	0	1	0	1	0	1	0	1	0	1	0	1	0	1	0	1	0	1	0
BP	GO:0042776	mitochondrial ATP synthesis coupled proton transport	2	1	0	1	0	1	0	1	0	1	0	1	0	1	0	1	0	1	0	1	0	1	0	1	0	1	0	1	0	1	0	1	0	1	0	1	0
BP	GO:0042780	tRNA 3'-end processing	11	1	0	1	1	1	0	1	0	1	0	1	0	1	0	1	0	1	0	1	0	1	0	1	0	1	0	1	0	1	0	1	0	1	0	1	0
BP	GO:0042793	plastid transcription	220	2.68756e-05	45	1	9	1	9	1	6	1	1	1	1	0.0914839	25	1	6	1	11	1	12	1	0	1	0	0.0630082	22	1	4	1	5	1	5	1	0	1	0
BP	GO:0042794	plastid rRNA transcription	2	1	0	1	0	1	0	1	0	1	0	1	0	1	0	1	0	1	0	1	0	1	0	1	0	1	0	1	0	1	0	1	0	1	0	1	0
BP	GO:0042814	monopolar cell growth	9	1	1	1	2	1	0	1	0	1	0	1	0	1	0	1	2	1	0	1	0	1	0	1	0	1	0	0.904099	2	1	0	1	0	1	0	1	0
BP	GO:0042817	pyridoxal metabolic process	2	1	0	1	0	1	0	1	0	1	0	1	0	1	0	1	0	1	0	1	0	1	0	1	0	1	0	1	0	1	0	1	0	1	0	1	0
BP	GO:0042819	vitamin B6 biosynthetic process	13	0.742772	3	1	0	1	1	1	0	1	0	1	0	1	0	1	0	1	2	1	1	1	0	1	0	1	0	1	0	1	1	1	0	1	0	1	0
BP	GO:0042821	pyridoxal biosynthetic process	2	1	0	1	0	1	0	1	0	1	0	1	0	1	0	1	0	1	0	1	0	1	0	1	0	1	0	1	0	1	0	1	0	1	0	1	0
BP	GO:0042906	xanthine transport	2	1	0	1	0	1	0	1	0	1	0	1	0	1	0	1	0	1	0	1	0	1	0	1	0	1	0	1	0	1	0	1	0	1	0	1	0
BP	GO:0042938	dipeptide transport	12	1	2	1	2	1	1	1	0	1	0	1	0	1	2	0.27574	4	1	1	1	1	1	0	1	0	0.900076	2	1	1	1	0	1	0	1	0	1	0
BP	GO:0042939	tripeptide transport	12	1	2	1	2	1	1	1	0	1	0	1	0	1	2	0.27574	4	1	1	1	1	1	0	1	0	0.900076	2	1	1	1	0	1	0	1	0	1	0
BP	GO:0042964	thioredoxin reduction	14	1	0	1	0	1	0	1	0	1	0	1	0	1	0	1	0	1	0	1	0	1	0	1	0	1	0	1	0	1	0	1	0	1	0	1	0
BP	GO:0042966	biotin carboxyl carrier protein biosynthetic process	3	1	0	1	1	1	0	1	0	1	0	1	0	1	0	1	0	1	0	1	1	1	0	1	0	1	0	1	0	1	0	1	0	1	0	1	0
BP	GO:0043039	tRNA aminoacylation	6	1	0	1	0	1	0	1	0	1	0	1	0	1	0	1	0	1	0	1	0	1	0	1	0	1	0	1	0	1	0	1	0	1	0	1	0
BP	GO:0043044	ATP-dependent chromatin remodeling	11	1	0	1	0	1	0	1	0	1	0	1	0	1	0	1	0	1	0	1	0	1	0	1	0	1	0	1	0	1	0	1	0	1	0	1	0
BP	GO:0043067	regulation of programmed cell death	38	0.472356	7	1	6	1	2	1	4	1	1	1	0	0.363585	6	1	6	1	3	1	5	1	0	1	0	0.483927	5	1	3	1	1	1	3	1	0	1	0
BP	GO:0043068	positive regulation of programmed cell death	18	1	3	1	1	1	2	1	1	1	0	1	0	0.83757	3	1	0	0.209022	4	1	0	1	0	1	0	1	2	1	0	1	2	1	0	1	0	1	0
BP	GO:0043069	negative regulation of programmed cell death	645	1.06661e-16	135	1	48	6.1129e-06	58	1	20	1	4	1	4	1.21966e-20	115	1	36	1.41453e-13	84	1	16	1	2	1	1	7.32051e-17	94	1	25	1.3172e-05	44	1	8	1	0	1	1
BP	GO:0043085	positive regulation of catalytic activity	328	0.431783	40	1	44	1	8	1	23	1	1	1	0	1	19	1	33	1	8	0.764073	36	1	0	1	0	1	15	1	26	1	5	1	19	1	0	1	0
BP	GO:0043086	negative regulation of catalytic activity	14	0.326781	4	1	2	1	0	1	0	1	0	1	0	1	0	0.922643	3	1	0	1	1	1	0	1	0	1	0	1	2	1	0	1	0	1	0	1	0
BP	GO:0043090	amino acid import	305	1	29	1	42	1	11	1	16	1	1	1	3	1	21	1	30	1	16	1	14	1	0	1	1	1	19	1	24	1	7	1	8	1	0	1	0
BP	GO:0043100	pyrimidine nucleobase salvage	2	1	0	1	0	1	0	1	0	1	0	1	0	1	0	1	0	1	0	1	0	1	0	1	0	1	0	1	0	1	0	1	0	1	0	1	0
BP	GO:0043132	NAD transport	14	0.834791	3	1	0	1	1	1	0	1	0	1	0	0.523594	3	1	0	1	1	1	0	1	0	1	0	0.400083	3	1	0	1	1	1	0	1	0	1	0
BP	GO:0043137	DNA replication, removal of RNA primer	2	1	0	0.982512	1	1	0	1	0	1	0	1	0	1	0	1	0	1	0	1	0	1	0	1	0	1	0	1	0	1	0	1	0	1	0	1	0
BP	GO:0043144	snoRNA processing	4	1	0	1	0	1	0	1	0	1	0	1	0	1	0	1	0	1	0	1	0	1	0	1	0	1	0	1	0	1	0	1	0	1	0	1	0
BP	GO:0043153	entrainment of circadian clock by photoperiod	5	1	1	1	0	1	1	1	0	1	0	1	0	1	0	1	0	1	0	1	0	1	0	1	0	1	0	1	0	1	0	1	0	1	0	1	0
BP	GO:0043157	response to cation stress	13	1	0	0.523339	4	1	0	1	0	1	0	1	0	1	0	0.34977	4	1	0	1	2	1	0	1	0	1	0	0.202889	4	1	0	1	0	1	0	1	0
BP	GO:0043161	proteasome-mediated ubiquitin-dependent protein catabolic process	401	1	18	1	28	1	8	1	8	1	3	1	2	1	10	1	17	1	8	1	12	1	3	1	1	1	8	1	13	1	5	1	6	1	0	1	0
BP	GO:0043181	vacuolar sequestering	13	1	0	1	0	1	0	1	0	1	0	1	0	1	0	1	0	1	1	1	0	1	0	1	0	1	0	1	0	1	0	1	0	1	0	1	0
BP	GO:0043182	vacuolar sequestering of sodium ion	6	1	0	1	0	1	0	1	0	1	0	1	0	1	0	1	0	1	0	1	0	1	0	1	0	1	0	1	0	1	0	1	0	1	0	1	0
BP	GO:0043201	response to leucine	5	1	0	1	0	1	0	1	0	1	0	1	0	1	0	0.574338	2	1	0	1	1	1	0	1	0	1	0	1	0	1	0	1	0	1	0	1	0
BP	GO:0043247	telomere maintenance in response to DNA damage	117	1	5	1	18	1	0	1	2	1	0	1	0	1	3	1	6	1	2	1	5	1	0	1	0	1	3	1	6	1	0	1	1	1	0	1	0
BP	GO:0043248	proteasome assembly	287	1	9	1	23	1	2	1	6	1	1	1	2	1	5	1	12	1	4	1	6	1	1	1	0	1	5	1	10	1	2	1	4	1	0	1	0
BP	GO:0043255	regulation of carbohydrate biosynthetic process	15	1	0	1	3	1	0	1	0	1	0	1	0	1	0	1	0	1	0	1	0	1	0	1	0	1	0	1	0	1	0	1	0	1	0	1	0
BP	GO:0043266	regulation of potassium ion transport	12	0.22207	4	1	1	1	0	1	0	1	0	1	0	1	1	1	1	1	0	1	1	1	0	1	0	1	1	1	1	1	0	1	0	1	0	1	0
BP	GO:0043268	positive regulation of potassium ion transport	4	1	0	1	0	1	0	1	0	1	0	1	0	1	0	1	0	1	0	1	0	1	0	1	0	1	0	1	0	1	0	1	0	1	0	1	0
BP	GO:0043269	regulation of ion transport	121	1	11	1	13	1	2	1	4	1	0	1	2	1	7	1	10	1	8	1	0	1	0	1	0	1	6	1	7	1	2	1	0	1	0	1	0
BP	GO:0043335	protein unfolding	5	0.101145	3	1	0	1	0	0.381142	2	1	0	1	0	0.380712	2	1	0	1	0	1	1	1	0	1	0	0.30709	2	1	0	1	0	1	1	1	0	1	0
BP	GO:0043388	positive regulation of DNA binding	3	1	0	1	0	1	0	1	0	1	0	1	0	1	0	1	0	1	0	1	1	1	0	1	0	1	0	1	0	1	0	1	0	1	0	1	0
BP	GO:0043392	negative regulation of DNA binding	4	1	0	0.00671449	4	1	0	1	0	1	0	1	0	1	0	0.00405303	4	1	0	1	0	1	0	1	0	1	0	0.00175547	4	1	0	1	0	1	0	1	0
BP	GO:0043405	regulation of MAP kinase activity	8	1	0	0.51809	3	1	0	1	1	1	0	1	0	1	0	0.949169	2	1	0	0.26359	3	1	0	1	0	1	0	0.830378	2	1	0	1	1	1	0	1	0
BP	GO:0043407	negative regulation of MAP kinase activity	42	1	5	1	3	0.476606	5	1	1	1	0	1	1	0.24107	7	1	2	1	3	1	3	1	0	1	0	1	3	1	2	1	3	1	1	1	0	1	0
BP	GO:0043433	negative regulation of DNA-binding transcription factor activity	25	1	3	1	3	1	1	1	3	1	0	1	0	1	2	1	3	1	0	1	2	1	0	1	0	1	2	1	2	1	0	1	0	1	0	1	0
BP	GO:0043447	alkane biosynthetic process	13	1	0	0.200385	5	1	0	1	1	1	0	1	0	1	0	0.34977	4	1	0	1	1	1	0	1	0	1	0	0.602371	3	1	0	1	0	1	0	1	0
BP	GO:0043457	regulation of cellular respiration	4	1	0	0.51809	2	1	0	1	1	1	0	1	0	1	0	1	1	1	0	1	0	1	0	1	1	1	0	1	1	1	0	1	0	1	0	1	0
BP	GO:0043481	anthocyanin accumulation in tissues in response to UV light	419	1	14	4.77724e-15	126	1	9	0.0227603	47	1	0	1	1	1	9	4.61442e-08	90	1	6	0.00270292	62	1	0	1	1	1	8	4.2092e-08	77	1	1	0.0104518	37	1	0	1	0
BP	GO:0043484	regulation of RNA splicing	17	0.520398	4	1	0	1	0	1	1	1	0	1	0	0.760394	3	1	0	1	0	1	1	1	0	1	0	1	1	1	0	1	0	1	1	1	0	1	0
BP	GO:0043488	regulation of mRNA stability	2	1	0	1	0	1	0	1	0	1	0	1	0	1	0	1	0	1	0	1	0	1	0	1	0	1	0	1	0	1	0	1	0	1	0	1	0
BP	GO:0043489	RNA stabilization	11	0.562409	3	1	0	1	1	1	0	1	0	1	1	1	0	1	0	1	1	1	0	1	0	1	1	1	0	1	0	1	1	1	0	1	0	1	0
BP	GO:0043496	regulation of protein homodimerization activity	4	1	1	1	0	1	0	1	0	1	0	1	0	1	0	1	0	1	0	1	1	1	0	1	0	1	0	1	0	1	0	1	0	1	0	1	0
BP	GO:0043547	positive regulation of GTPase activity	4	0.377063	2	1	0	1	1	1	0	1	0	1	0	1	1	1	0	1	0	1	0	1	0	1	0	1	1	1	0	1	0	1	0	1	0	1	0
BP	GO:0043562	cellular response to nitrogen levels	21	0.133106	6	1	0	0.711533	3	1	1	0.882847	2	1	0	1	2	1	0	0.873634	3	1	0	1	0	1	0	1	2	1	0	1	2	1	0	1	0	1	0
BP	GO:0043570	maintenance of DNA repeat elements	11	1	0	0.356189	4	1	0	1	0	1	0	1	0	1	0	1	2	1	0	1	1	1	0	1	0	1	0	1	2	1	0	1	0	1	0	1	0
BP	GO:0043572	plastid fission	16	1	1	1	0	1	1	1	0	1	0	1	0	1	2	1	0	1	2	1	0	1	0	1	1	1	1	1	0	1	1	1	0	1	0	1	0
BP	GO:0043574	peroxisomal transport	5	1	0	1	0	1	0	1	0	1	0	1	0	1	0	1	0	1	0	1	0	1	0	1	0	1	0	1	0	1	0	1	0	1	0	1	0
BP	GO:0043609	regulation of carbon utilization	9	1	1	1	0	1	0	1	0	1	0	1	0	1	0	1	1	1	0	1	0	1	0	1	0	1	0	1	0	1	0	1	0	1	0	1	0
BP	GO:0043617	cellular response to sucrose starvation	10	0.000236589	7	1	1	0.176763	3	0.877708	2	1	0	1	0	0.0664051	4	1	2	0.873634	2	1	2	1	0	1	0	0.037633	4	1	1	0.499029	2	0.633393	2	1	0	1	0
BP	GO:0043619	regulation of transcription from RNA polymerase II promoter in response to oxidative stress	3	1	0	1	1	1	0	0.170502	2	1	0	1	0	1	0	0.0237061	3	1	0	0.21553	2	1	0	1	0	1	0	1	1	1	0	0.104387	2	1	0	1	0
BP	GO:0043620	regulation of DNA-templated transcription in response to stress	4	0.0512043	3	1	0	0.209999	2	1	0	1	0	1	0	1	1	1	0	1	1	1	0	1	0	1	0	1	1	1	0	1	1	1	0	1	0	1	0
BP	GO:0043622	cortical microtubule organization	73	1	3	1	8	1	2	1	3	1	0	1	0	1	4	1	4	1	2	1	1	1	0	1	0	1	2	1	4	1	1	1	1	1	0	1	0
BP	GO:0043631	RNA polyadenylation	10	1	0	1	0	1	0	1	0	1	0	1	0	1	0	1	0	1	0	1	1	1	0	1	0	1	0	1	0	1	0	1	0	1	0	1	0
BP	GO:0043686	co-translational protein modification	4	1	0	1	0	1	1	1	0	1	0	1	0	1	0	1	0	1	0	1	0	1	0	1	0	1	0	1	0	1	0	1	0	1	0	1	0
BP	GO:0043687	post-translational protein modification	300	0.431783	37	1	9	1	15	1	3	1	0	0.149174	9	1	21	1	6	1	14	1	4	1	0	1	0	1	19	1	6	1	8	1	1	1	0	1	0
BP	GO:0043697	cell dedifferentiation	2	1	0	1	0	1	0	1	0	1	0	1	0	1	0	1	0	1	0	1	0	1	0	1	0	1	0	1	0	1	0	1	0	1	0	1	0
BP	GO:0043900	regulation of multi-organism process	365	0.0046102	56	1	22	1	13	1	11	1	3	1	0	0.00408166	43	1	24	0.249794	28	1	15	1	0	1	1	0.043797	33	1	16	1	10	1	7	1	0	1	0
BP	GO:0043903	regulation of symbiosis, encompassing mutualism through parasitism	4	1	0	1	0	1	0	1	0	1	0	1	1	0.268236	2	1	0	1	0	1	0	1	0	1	0	1	0	1	0	1	0	1	0	1	0	1	0
BP	GO:0043966	histone H3 acetylation	7	0.228611	3	1	0	1	0	1	0	1	0	1	0	0.609835	2	1	0	1	0	1	0	1	0	1	0	0.486435	2	1	0	1	0	1	0	1	0	1	0
BP	GO:0043967	histone H4 acetylation	3	1	0	1	0	1	0	1	0	1	0	1	0	1	0	1	0	1	0	1	0	1	0	1	0	1	0	1	0	1	0	1	0	1	0	1	0
BP	GO:0043971	histone H3-K18 acetylation	2	1	0	1	0	1	0	1	0	1	0	1	0	1	0	1	0	1	0	1	0	1	0	1	0	1	0	1	0	1	0	1	0	1	0	1	0
BP	GO:0043972	histone H3-K23 acetylation	2	1	0	1	0	1	0	1	0	1	0	1	0	1	0	1	0	1	0	1	0	1	0	1	0	1	0	1	0	1	0	1	0	1	0	1	0
BP	GO:0043985	histone H4-R3 methylation	4	1	0	1	0	1	0	1	0	1	0	1	0	1	0	1	0	1	0	1	0	1	0	1	0	1	0	1	0	1	0	1	0	1	0	1	0
BP	GO:0043987	histone H3-S10 phosphorylation	4	1	0	0.51809	2	1	0	1	1	1	0	1	0	1	0	1	1	1	0	1	0	1	0	1	0	1	0	1	1	1	0	1	0	1	0	1	0
BP	GO:0043988	histone H3-S28 phosphorylation	4	1	0	0.51809	2	1	0	1	1	1	0	1	0	1	0	1	1	1	0	1	0	1	0	1	0	1	0	1	1	1	0	1	0	1	0	1	0
BP	GO:0044030	regulation of DNA methylation	33	1	0	1	6	1	0	1	2	1	0	1	0	1	0	0.768183	6	1	0	0.241675	7	1	0	1	0	1	0	0.850511	5	1	0	1	2	1	0	1	0
BP	GO:0044036	cell wall macromolecule metabolic process	240	0.836143	28	9.12598e-11	77	0.0475928	21	6.51533e-07	44	1	2	1	1	0.268236	24	0.00465954	46	0.409706	19	3.81959e-06	49	1	1	1	0	0.320772	20	0.000540365	42	0.0518511	16	2.17926e-05	32	1	0	1	0
BP	GO:0044090	positive regulation of vacuole organization	4	1	0	1	0	1	0	1	0	1	0	1	0	1	0	1	0	1	0	1	0	1	0	1	0	1	0	1	0	1	0	1	0	1	0	1	0
BP	GO:0044148	positive regulation of growth of symbiont involved in interaction with host	2	1	0	1	0	1	0	0.0743321	2	1	0	1	0	1	0	1	0	1	0	0.0982751	2	1	0	1	0	1	0	1	0	1	0	0.0433033	2	1	0	1	0
BP	GO:0044154	histone H3-K14 acetylation	2	1	0	1	0	1	0	1	0	1	0	1	0	1	0	1	0	1	0	1	0	1	0	1	0	1	0	1	0	1	0	1	0	1	0	1	0
BP	GO:0044206	UMP salvage	6	1	0	1	1	1	0	1	0	1	0	1	0	1	0	1	0	1	0	1	0	1	0	1	0	1	0	1	0	1	0	1	0	1	0	1	0
BP	GO:0044242	cellular lipid catabolic process	37	1	2	0.0495599	12	1	1	1	4	1	0	1	0	1	2	0.0738697	10	1	0	1	5	0.215009	2	1	0	1	2	0.305813	7	1	0	1	2	1	0	1	0
BP	GO:0044257	cellular protein catabolic process	2	1	0	0.982512	1	1	0	1	0	1	0	1	0	1	0	0.922643	1	1	0	1	0	1	0	1	0	1	0	1	0	1	0	1	0	1	0	1	0
BP	GO:0044262	cellular carbohydrate metabolic process	7	1	0	1	0	1	0	1	0	1	0	1	0	1	0	1	0	1	0	1	0	1	0	1	0	1	0	1	0	1	0	1	0	1	0	1	0
BP	GO:0044265	cellular macromolecule catabolic process	40	0.000341232	14	1	2	1	3	1	1	1	0	1	0	1	4	1	0	1	2	1	0	1	0	1	0	1	4	1	0	1	2	1	0	1	0	1	0
BP	GO:0044272	sulfur compound biosynthetic process	131	1	15	0.156354	28	0.631742	10	1	10	1	1	1	0	0.941361	12	0.111844	24	1	9	0.374291	18	1	0	1	1	0.677014	11	0.202889	19	0.245837	9	1	6	1	0	1	0
BP	GO:0044375	regulation of peroxisome size	10	1	1	1	0	1	1	1	0	1	0	1	0	1	1	1	0	1	1	1	0	1	0	1	0	1	1	1	0	1	1	1	0	1	0	1	0
BP	GO:0044419	interspecies interaction between organisms	8	0.973113	2	1	0	1	0	1	0	1	0	1	0	0.74504	2	1	0	1	1	1	0	1	0	1	0	0.582956	2	1	0	1	0	1	0	1	0	1	0
BP	GO:0044774	mitotic DNA integrity checkpoint	2	1	0	0.157942	2	1	0	0.802657	1	1	0	1	0	1	0	0.11967	2	1	0	0.0982751	2	1	0	1	0	1	0	0.0902099	2	1	0	0.665369	1	1	0	1	0
BP	GO:0045003	double-strand break repair via synthesis-dependent strand annealing	13	1	2	1	0	1	0	1	0	1	0	1	0	1	1	1	0	1	1	1	0	1	0	1	0	1	1	1	0	1	0	1	0	1	0	1	0
BP	GO:0045004	DNA replication proofreading	2	1	0	0.982512	1	1	0	1	0	1	0	1	0	1	0	1	0	1	0	1	0	1	0	1	0	1	0	1	0	1	0	1	0	1	0	1	0
BP	GO:0045010	actin nucleation	343	1	10	0.136172	64	1	0	1	20	1	1	1	2	1	8	0.966782	43	1	4	1	27	1	1	1	0	1	6	0.554927	38	1	0	1	13	1	0	1	0
BP	GO:0045014	carbon catabolite repression of transcription by glucose	5	1	0	1	0	1	0	1	0	1	0	1	0	1	0	1	0	1	0	1	0	1	0	1	0	1	0	1	0	1	0	1	0	1	0	1	0
BP	GO:0045017	glycerolipid biosynthetic process	10	1	0	1	0	1	0	1	0	1	0	1	0	1	0	1	0	1	0	1	0	1	0	1	0	1	0	1	0	1	0	1	0	1	0	1	0
BP	GO:0045022	early endosome to late endosome transport	5	1	0	1	0	1	0	1	0	1	0	1	0	1	0	1	0	1	0	1	0	1	0	1	0	1	0	1	0	1	0	1	0	1	0	1	0
BP	GO:0045036	protein targeting to chloroplast	162	0.804144	20	1	6	1	7	1	9	1	0	1	3	1	11	1	4	1	3	1	12	1	0	1	0	1	9	1	4	1	3	1	6	1	0	1	0
BP	GO:0045037	protein import into chloroplast stroma	62	1	4	1	3	1	0	1	2	1	0	1	1	1	2	1	2	1	0	1	2	1	0	1	0	1	2	1	2	1	0	1	2	1	0	1	0
BP	GO:0045038	protein import into chloroplast thylakoid membrane	24	1	1	1	1	1	0	1	1	1	0	1	0	1	0	1	0	1	0	1	1	1	0	1	0	1	0	1	0	1	0	1	1	1	0	1	0
BP	GO:0045039	protein import into mitochondrial inner membrane	11	1	0	1	1	1	0	1	0	1	0	1	1	1	0	1	1	1	0	1	1	1	0	1	0	1	0	1	1	1	0	1	0	1	0	1	0
BP	GO:0045053	protein retention in Golgi apparatus	5	1	0	1	1	1	0	1	1	1	0	1	0	1	0	1	1	1	0	1	1	1	0	1	0	1	0	1	1	1	0	1	1	1	0	1	0
BP	GO:0045087	innate immune response	342	0.0549171	48	1	18	0.869461	20	1	4	1	2	1	1	0.0416197	37	1	17	0.0818823	29	1	6	1	1	1	0	0.194916	28	1	10	0.1228	19	1	0	1	1	1	0
BP	GO:0045088	regulation of innate immune response	158	1	18	1	8	1	5	1	5	1	2	1	0	0.0747626	20	1	5	0.915373	12	1	5	1	1	1	0	0.406821	14	1	4	1	3	1	4	1	0	1	0
BP	GO:0045116	protein neddylation	8	1	1	1	0	1	0	1	0	1	0	1	0	0.74504	2	1	0	1	0	1	0	1	0	1	0	1	1	1	0	1	0	1	0	1	0	1	0
BP	GO:0045128	negative regulation of reciprocal meiotic recombination	7	1	0	0.982512	2	1	0	1	0	1	0	1	0	1	0	1	1	1	0	1	0	1	0	1	0	1	0	1	0	1	0	1	0	1	0	1	0
BP	GO:0045132	meiotic chromosome segregation	250	1	16	1	32	1	5	1	4	1	0	1	0	1	12	1	16	1	8	1	11	1	0	1	1	1	10	1	14	1	2	1	3	1	0	1	0
BP	GO:0045143	homologous chromosome segregation	3	1	0	1	0	1	0	1	0	1	0	1	0	1	0	1	0	1	0	1	0	1	0	1	0	1	0	1	0	1	0	1	0	1	0	1	0
BP	GO:0045165	cell fate commitment	10	1	0	0.276983	4	1	0	0.877708	2	1	0	1	0	1	0	0.550424	3	1	0	0.395392	3	1	0	1	0	1	0	0.366556	3	1	0	0.633393	2	1	0	1	0
BP	GO:0045168	cell-cell signaling involved in cell fate commitment	5	1	0	0.170437	3	1	1	0.0524224	3	1	0	1	0	1	0	0.574338	2	1	0	0.0868169	3	1	0	1	0	1	0	0.438873	2	1	0	0.230446	2	1	0	1	0
BP	GO:0045176	apical protein localization	2	0.979073	1	1	0	1	0	1	0	1	0	1	0	0.898895	1	1	0	1	0	1	0	1	0	1	0	0.772216	1	1	0	1	0	1	0	1	0	1	0
BP	GO:0045185	maintenance of protein location	2	1	0	1	0	1	0	1	0	1	0	1	0	1	0	1	0	1	0	1	0	1	0	1	0	1	0	1	0	1	0	1	0	1	0	1	0
BP	GO:0045292	mRNA cis splicing, via spliceosome	2	1	0	0.157942	2	1	0	1	0	1	0	1	0	1	0	0.922643	1	1	0	1	0	1	0	1	0	1	0	0.850511	1	1	0	1	0	1	0	1	0
BP	GO:0045324	late endosome to vacuole transport	12	1	1	1	0	1	0	1	0	1	0	1	0	1	1	1	1	1	0	1	1	1	0	1	0	1	0	1	0	1	0	1	0	1	0	1	0
BP	GO:0045333	cellular respiration	66	1	3	1	4	1	2	1	3	1	0	1	0	1	3	1	1	1	2	1	4	1	0	1	0	1	2	1	0	1	2	1	3	1	0	1	0
BP	GO:0045337	farnesyl diphosphate biosynthetic process	4	1	0	0.102204	3	1	0	0.000964882	4	1	0	1	0	1	0	0.00405303	4	1	0	0.00193128	4	1	0	1	0	1	0	0.0396722	3	1	0	0.000288155	4	1	0	1	0
BP	GO:0045338	farnesyl diphosphate metabolic process	2	1	0	1	0	1	0	1	0	1	0	1	0	1	0	1	0	0.926819	1	1	0	1	0	1	0	1	0	1	0	1	0	1	0	1	0	1	0
BP	GO:0045454	cell redox homeostasis	54	0.818436	8	1	3	1	1	1	3	1	2	1	0	0.523725	7	1	2	1	1	1	7	1	0	1	0	0.582956	6	1	2	1	1	1	3	1	0	1	0
BP	GO:0045487	gibberellin catabolic process	14	0.326781	4	1	1	1	2	1	1	1	0	1	0	1	1	1	0	1	1	1	0	1	0	1	0	1	1	1	0	1	1	1	0	1	0	1	0
BP	GO:0045488	pectin metabolic process	6	1	0	0.845832	2	1	0	1	0	1	0	1	0	1	0	1	1	1	0	1	0	1	0	1	0	1	0	1	1	1	0	1	0	1	0	1	0
BP	GO:0045489	pectin biosynthetic process	20	1	1	0.000548206	11	1	1	0.137413	5	1	0	1	0	1	1	0.0604813	7	1	1	1	2	1	0	1	0	1	1	0.0209912	7	1	1	1	2	1	0	1	0
BP	GO:0045490	pectin catabolic process	13	1	0	1	0	1	0	1	0	1	0	1	0	1	0	1	1	1	0	1	0	1	0	1	0	1	0	1	0	1	0	1	0	1	0	1	0
BP	GO:0045491	xylan metabolic process	4	1	0	0.102204	3	1	0	0.0261589	3	1	0	1	0	1	0	0.0652213	3	1	0	0.00193128	4	1	0	1	0	1	0	0.0396722	3	1	0	0.0124881	3	1	0	1	0
BP	GO:0045492	xylan biosynthetic process	519	1	16	1.52488e-06	120	1	8	1.40436e-12	89	1	1	1	0	1	17	0.0560432	78	1	11	0.000268594	78	1	0	1	1	1	10	0.0227509	67	1	4	1.15911e-07	60	1	0	1	0
BP	GO:0045493	xylan catabolic process	9	1	1	0.204209	4	1	0	0.236671	3	1	0	1	0	1	0	0.11967	4	1	0	1	1	1	0	1	0	1	0	0.0721658	4	1	0	1	1	1	0	1	0
BP	GO:0045595	regulation of cell differentiation	165	1	4	1	18	1	2	1	2	1	0	1	2	1	1	1	11	1	4	1	5	1	0	1	1	1	1	1	10	1	0	1	1	1	0	1	0
BP	GO:0045596	negative regulation of cell differentiation	3	1	0	1	0	1	0	1	0	1	1	1	0	1	0	1	0	1	0	1	0	1	0	1	0	1	0	1	0	1	0	1	0	1	0	1	0
BP	GO:0045597	positive regulation of cell differentiation	11	1	1	0.843331	3	1	0	0.99031	2	1	0	1	0	1	1	1	2	1	0	1	1	1	1	1	0	1	1	1	2	1	0	1	1	1	0	1	0
BP	GO:0045604	regulation of epidermal cell differentiation	7	1	0	1	0	1	1	1	0	1	0	1	0	1	1	1	0	1	1	1	0	1	0	1	0	1	0	1	0	1	1	1	0	1	0	1	0
BP	GO:0045694	regulation of embryo sac egg cell differentiation	11	1	0	1	0	1	0	1	0	1	0	1	0	1	0	1	0	1	1	1	0	1	0	1	0	1	0	1	0	1	0	1	0	1	0	1	0
BP	GO:0045723	positive regulation of fatty acid biosynthetic process	4	1	0	1	1	1	0	0.273715	2	1	0	1	0	1	0	1	1	1	0	0.337837	2	1	0	1	0	1	0	1	1	1	0	0.164787	2	1	0	1	0
BP	GO:0045727	positive regulation of translation	74	1	6	1	4	1	0	1	4	1	0	1	0	1	5	1	1	1	1	1	4	1	0	1	0	1	4	1	1	1	0	1	3	1	0	1	0
BP	GO:0045730	respiratory burst	4	0.377063	2	1	0	1	1	1	0	1	0	1	0	1	1	1	0	1	1	1	0	1	0	1	0	1	1	1	0	1	1	1	0	1	0	1	0
BP	GO:0045732	positive regulation of protein catabolic process	2	1	0	1	0	1	0	1	0	1	0	1	0	1	0	1	0	1	0	1	0	1	0	1	0	1	0	1	0	1	0	1	0	1	0	1	0
BP	GO:0045736	negative regulation of cyclin-dependent protein serine/threonine kinase activity	94	1	5	0.117311	22	1	0	1	4	1	0	1	0	1	2	0.141779	18	1	1	1	9	1	0	1	0	1	2	0.172953	15	1	0	1	3	1	0	1	0
BP	GO:0045739	positive regulation of DNA repair	8	1	0	1	0	1	0	1	0	1	0	1	0	1	1	1	0	1	0	1	0	1	0	1	0	1	0	1	0	1	0	1	0	1	0	1	0
BP	GO:0045740	positive regulation of DNA replication	2	1	0	1	0	1	0	1	0	1	0	1	0	1	0	1	0	1	0	1	0	1	0	1	0	1	0	1	0	1	0	1	0	1	0	1	0
BP	GO:0045786	negative regulation of cell cycle	6	1	1	1	0	1	0	1	0	1	0	1	0	1	0	1	0	1	0	1	0	1	0	1	0	1	0	1	0	1	0	1	0	1	0	1	0
BP	GO:0045787	positive regulation of cell cycle	48	1	6	0.965372	9	1	1	1	1	1	0	1	1	1	0	1	1	1	0	1	1	1	0	1	0	1	0	1	1	1	0	1	0	1	0	1	0
BP	GO:0045792	negative regulation of cell size	6	1	0	1	1	1	0	1	0	1	0	1	0	1	1	1	0	1	0	1	1	1	0	1	0	1	0	1	0	1	0	1	0	1	0	1	0
BP	GO:0045793	positive regulation of cell size	8	1	0	1	1	1	0	1	1	1	0	1	0	1	0	0.949169	2	1	0	0.830673	2	1	0	1	0	1	0	1	1	1	0	1	1	1	0	1	0
BP	GO:0045814	negative regulation of gene expression, epigenetic	13	1	0	1	0	1	0	1	0	1	0	1	0	1	0	1	0	1	0	1	0	1	0	1	0	1	0	1	0	1	0	1	0	1	0	1	0
BP	GO:0045836	positive regulation of meiotic nuclear division	19	1	2	1	0	1	0	1	0	1	0	1	0	1	2	1	0	1	0	1	0	1	0	1	0	1	1	1	0	1	0	1	0	1	0	1	0
BP	GO:0045839	negative regulation of mitotic nuclear division	6	1	0	0.845832	2	1	0	1	0	1	0	1	0	1	0	0.180359	3	1	0	1	1	1	0	1	0	1	0	0.554927	2	1	0	1	0	1	0	1	0
BP	GO:0045848	positive regulation of nitrogen utilization	2	1	0	1	0	1	0	1	0	1	0	1	0	1	0	1	0	1	0	1	0	1	0	1	0	1	0	1	0	1	0	1	0	1	0	1	0
BP	GO:0045857	negative regulation of molecular function, epigenetic	5	1	0	1	0	1	0	1	0	1	0	1	0	1	0	1	0	1	0	1	0	1	0	1	0	1	0	1	0	1	0	1	0	1	0	1	0
BP	GO:0045860	positive regulation of protein kinase activity	2	1	0	1	0	1	0	1	0	1	0	1	0	1	0	1	0	1	0	1	0	1	0	1	0	1	0	1	0	1	0	1	0	1	0	1	0
BP	GO:0045876	positive regulation of sister chromatid cohesion	3	1	0	0.33767	2	1	0	1	0	1	0	1	0	1	0	1	0	1	0	1	0	1	0	1	0	1	0	1	0	1	0	1	0	1	0	1	0
BP	GO:0045892	negative regulation of transcription, DNA-templated	507	1	54	1	68	0.680636	29	1	35	1	6	1	2	0.982122	39	1	57	1	30	1	46	1	0	1	0	0.805946	33	1	42	0.756282	21	1	23	1	0	1	0
BP	GO:0045893	positive regulation of transcription, DNA-templated	1323	8.51612e-05	176	1	109	0.303849	71	1	62	1	8	1	12	1	94	1	81	1	64	1	84	1	5	1	2	0.262278	86	1	63	1	39	1	46	1	1	1	0
BP	GO:0045910	negative regulation of DNA recombination	14	1	0	1	3	1	0	1	0	1	0	1	0	1	0	1	2	1	0	1	1	1	0	1	0	1	0	1	2	1	0	1	0	1	0	1	0
BP	GO:0045926	negative regulation of growth	11	1	1	1	2	1	1	1	0	1	0	1	0	1	1	0.628737	3	1	1	0.481418	3	1	0	1	0	1	1	1	2	1	1	1	0	1	0	1	0
BP	GO:0045927	positive regulation of growth	13	1	2	1	0	1	0	1	0	1	0	1	0	1	1	1	0	1	0	1	0	1	0	1	0	1	1	1	0	1	0	1	0	1	0	1	0
BP	GO:0045930	negative regulation of mitotic cell cycle	4	1	0	1	0	1	0	1	0	1	0	1	0	1	0	1	0	1	0	1	0	1	0	1	0	1	0	1	0	1	0	1	0	1	0	1	0
BP	GO:0045931	positive regulation of mitotic cell cycle	9	1	0	1	0	1	1	1	0	1	0	1	0	1	1	1	0	1	1	1	0	1	0	1	0	1	0	1	0	1	0	1	0	1	0	1	0
BP	GO:0045947	negative regulation of translational initiation	3	1	0	1	0	1	0	1	0	1	0	1	0	1	0	1	0	1	0	1	0	1	0	1	0	1	0	1	0	1	0	1	0	1	0	1	0
BP	GO:0045962	positive regulation of development, heterochronic	28	1	1	0.12423	9	1	0	0.381142	5	1	0	1	0	1	0	0.518991	6	1	0	0.618119	5	1	0	1	0	1	0	0.271727	6	1	0	0.142468	5	1	0	1	0
BP	GO:0045995	regulation of embryonic development	13	1	1	1	1	1	0	1	1	1	0	1	0	1	0	1	2	1	0	1	2	1	0	1	0	1	0	1	1	1	0	1	1	1	0	1	0
BP	GO:0046085	adenosine metabolic process	1	1	0	1	0	1	0	1	0	1	0	1	0	1	0	1	0	1	0	1	0	1	0	1	0	1	0	1	0	1	0	1	0	1	0	1	0
BP	GO:0046098	guanine metabolic process	2	1	0	1	0	1	0	1	0	1	0	1	0	1	0	1	0	1	0	1	0	1	0	1	0	1	0	1	0	1	0	1	0	1	0	1	0
BP	GO:0046100	hypoxanthine metabolic process	2	1	0	1	0	1	0	1	0	1	0	1	0	1	0	1	0	1	0	1	0	1	0	1	0	1	0	1	0	1	0	1	0	1	0	1	0
BP	GO:0046109	uridine biosynthetic process	2	1	0	1	0	1	0	0.802657	1	1	0	1	0	1	0	1	0	1	0	0.836012	1	1	0	1	0	1	0	1	0	1	0	0.665369	1	1	0	1	0
BP	GO:0046110	xanthine metabolic process	4	1	0	1	0	1	0	1	0	1	0	1	0	1	0	1	0	1	0	1	0	1	0	1	0	1	0	1	0	1	0	1	0	1	0	1	0
BP	GO:0046166	glyceraldehyde-3-phosphate biosynthetic process	4	1	0	1	0	1	0	1	0	1	0	1	0	1	0	1	0	1	0	1	0	1	0	1	0	1	0	1	0	1	0	1	0	1	0	1	0
BP	GO:0046167	glycerol-3-phosphate biosynthetic process	3	1	0	1	0	1	0	1	1	1	0	1	0	1	0	1	0	1	0	1	1	1	0	1	0	1	0	1	0	1	0	1	0	1	0	1	0
BP	GO:0046185	aldehyde catabolic process	2	1	0	1	0	1	0	1	0	1	0	1	0	1	0	1	0	1	0	1	0	1	0	1	0	1	0	1	0	1	0	1	0	1	0	1	0
BP	GO:0046202	cyanide biosynthetic process	2	1	0	1	0	1	0	1	0	1	0	1	0	1	0	1	0	1	0	1	0	1	0	1	0	1	0	1	0	1	0	1	0	1	0	1	0
BP	GO:0046244	salicylic acid catabolic process	4	1	0	1	1	1	0	1	0	1	0	1	0	1	0	1	0	1	0	1	0	1	0	1	0	1	0	1	0	1	0	1	0	1	0	1	0
BP	GO:0046246	terpene biosynthetic process	3	1	0	1	1	1	0	1	1	1	0	1	0	1	0	1	1	1	0	1	1	1	0	1	0	1	0	1	1	1	0	0.887595	1	1	0	1	0
BP	GO:0046274	lignin catabolic process	4	1	0	1	1	1	0	1	0	1	0	1	0	1	0	1	0	1	0	1	0	1	0	1	0	1	0	1	0	1	0	1	0	1	0	1	0
BP	GO:0046283	anthocyanin-containing compound metabolic process	23	1	0	0.51809	6	1	0	0.576847	4	1	0	1	0	1	0	1	4	1	0	0.382623	5	1	0	1	0	1	0	1	2	1	0	1	2	1	0	1	0
BP	GO:0046292	formaldehyde metabolic process	4	1	0	1	0	1	0	1	0	1	0	1	0	1	0	1	0	1	0	1	0	1	0	1	0	1	0	1	0	1	0	1	0	1	0	1	0
BP	GO:0046340	diacylglycerol catabolic process	3	1	0	0.33767	2	1	0	1	0	1	0	1	0	1	0	1	0	1	0	1	0	1	0	1	0	1	0	1	0	1	0	1	0	1	0	1	0
BP	GO:0046345	abscisic acid catabolic process	6	1	1	0.845832	2	1	0	1	1	1	0	1	0	0.489154	2	0.695989	2	1	0	1	1	1	0	1	0	1	1	0.554927	2	1	0	1	1	1	0	1	0
BP	GO:0046369	galactose biosynthetic process	4	0.0512043	3	1	0	0.209999	2	1	0	1	0	1	0	0.268236	2	1	0	1	0	1	0	1	0	1	0	0.212717	2	1	0	1	0	1	0	1	0	1	0
BP	GO:0046396	D-galacturonate metabolic process	3	1	0	1	0	1	0	1	0	1	0	1	0	1	0	1	1	1	0	1	1	1	0	1	0	1	0	1	0	1	0	1	0	1	0	1	0
BP	GO:0046398	UDP-glucuronate metabolic process	2	1	0	1	0	1	0	1	0	1	0	1	0	1	0	1	0	1	0	1	0	1	0	1	0	1	0	1	0	1	0	1	0	1	0	1	0
BP	GO:0046417	chorismate metabolic process	2	1	0	1	0	1	0	1	0	1	0	1	0	1	0	0.922643	1	1	0	1	0	1	0	1	0	1	0	1	0	1	0	1	0	1	0	1	0
BP	GO:0046443	FAD metabolic process	2	0.979073	1	1	0	0.871675	1	1	0	1	0	1	0	0.898895	1	1	0	1	0	1	0	1	0	1	0	0.772216	1	1	0	1	0	1	0	1	0	1	0
BP	GO:0046459	short-chain fatty acid metabolic process	4	0.377063	2	1	0	1	0	1	0	1	0	1	0	1	0	1	0	1	0	1	0	1	0	1	0	1	0	1	0	1	0	1	0	1	0	1	0
BP	GO:0046466	membrane lipid catabolic process	4	1	0	1	0	1	0	1	0	1	0	1	0	1	0	1	0	1	0	1	1	1	0	1	0	1	0	1	0	1	0	1	0	1	0	1	0
BP	GO:0046470	phosphatidylcholine metabolic process	4	0.0512043	3	1	0	1	0	1	0	1	0	1	0	1	1	1	0	1	0	1	0	1	0	1	0	1	1	1	0	1	0	1	0	1	0	1	0
BP	GO:0046471	phosphatidylglycerol metabolic process	4	1	0	1	0	1	0	1	1	1	0	1	0	1	0	1	1	1	0	1	0	1	0	1	0	1	0	1	0	1	0	1	0	1	0	1	0
BP	GO:0046473	phosphatidic acid metabolic process	4	1	0	1	0	1	0	1	0	1	0	1	0	1	0	1	0	1	1	1	0	1	0	1	0	1	0	1	0	1	0	1	0	1	0	1	0
BP	GO:0046477	glycosylceramide catabolic process	12	1	1	0.965372	3	1	0	0.409071	3	1	0	1	0	1	0	0.712099	3	1	0	0.571667	3	1	0	1	0	1	0	0.529056	3	1	0	0.758778	2	1	0	1	0
BP	GO:0046482	para-aminobenzoic acid metabolic process	115	0.00379342	24	1	9	1	5	1	4	1	0	1	1	0.603874	12	1	4	1	9	1	8	0.167924	3	1	0	0.412687	11	1	4	1	4	1	4	1	0	1	0
BP	GO:0046486	glycerolipid metabolic process	2	1	0	1	0	1	0	1	0	1	0	1	0	1	0	1	0	1	0	1	0	1	0	1	0	1	0	1	0	1	0	1	0	1	0	1	0
BP	GO:0046487	glyoxylate metabolic process	4	1	0	1	0	1	0	1	0	1	0	1	0	1	0	1	0	1	0	1	0	1	0	1	0	1	0	1	0	1	0	1	0	1	0	1	0
BP	GO:0046488	phosphatidylinositol metabolic process	4	1	0	1	0	1	0	1	0	1	0	1	0	1	0	1	0	1	0	1	0	1	0	1	0	1	0	1	0	1	0	1	0	1	0	1	0
BP	GO:0046500	S-adenosylmethionine metabolic process	2	1	0	0.157942	2	1	0	0.0743321	2	1	0	1	0	1	0	0.11967	2	1	0	0.0982751	2	1	0	1	0	1	0	0.0902099	2	1	0	0.0433033	2	1	0	1	0
BP	GO:0046506	sulfolipid biosynthetic process	11	1	0	1	0	1	1	1	0	1	1	1	0	1	0	1	1	1	0	1	1	1	0	1	0	1	0	1	0	1	0	1	0	1	0	1	0
BP	GO:0046520	sphingoid biosynthetic process	82	1	5	1	11	1	1	1	8	1	2	1	0	1	4	1	8	1	2	1	7	1	0	1	0	1	3	1	8	1	1	1	6	1	0	1	0
BP	GO:0046621	negative regulation of organ growth	11	1	1	1	0	1	0	1	0	1	0	1	0	1	1	1	0	1	0	1	1	1	0	1	0	1	1	1	0	1	0	1	0	1	0	1	0
BP	GO:0046622	positive regulation of organ growth	7	1	0	0.102204	4	1	0	5.11133e-05	6	1	0	1	0	1	1	0.264978	3	1	0	0.000137706	6	1	0	1	0	1	0	0.172953	3	1	0	1.02983e-05	6	1	0	1	0
BP	GO:0046653	tetrahydrofolate metabolic process	8	1	1	1	0	1	0	1	0	1	0	1	0	1	0	1	0	1	0	1	1	1	0	1	0	1	0	1	0	1	0	1	0	1	0	1	0
BP	GO:0046654	tetrahydrofolate biosynthetic process	2	1	0	1	0	1	0	1	0	1	0	1	0	1	0	1	0	1	0	1	0	1	0	1	0	1	0	1	0	1	0	1	0	1	0	1	0
BP	GO:0046656	folic acid biosynthetic process	2	1	0	1	0	1	0	1	0	1	0	1	0	1	0	0.922643	1	1	0	1	0	1	0	1	0	1	0	1	0	1	0	1	0	1	0	1	0
BP	GO:0046677	response to antibiotic	4	1	0	1	0	1	0	0.273715	2	1	0	1	0	1	1	1	0	1	0	0.337837	2	1	0	1	0	1	0	1	0	1	0	0.164787	2	1	0	1	0
BP	GO:0046680	response to DDT	2	0.979073	1	1	0	1	0	1	0	1	0	1	0	1	0	1	0	1	0	1	0	1	0	1	0	1	0	1	0	1	0	1	0	1	0	1	0
BP	GO:0046685	response to arsenic-containing substance	126	0.267549	19	0.982512	21	1	5	1	11	1	3	1	0	0.869553	12	0.60882	19	0.926819	10	0.191295	19	1	0	1	0	0.596433	11	0.823381	15	1	5	0.651536	10	1	0	1	0
BP	GO:0046686	response to cadmium ion	1921	1	152	0.985249	284	1	77	0.502141	152	1	12	1	20	1	115	1	210	1	93	0.397765	195	1	3	1	22	1	96	1	174	1	59	0.686579	105	1	0	1	3
BP	GO:0046688	response to copper ion	38	1	3	1	4	1	1	1	2	1	1	1	0	1	3	1	4	1	0	1	2	1	0	1	0	1	3	1	2	1	0	1	1	1	0	1	0
BP	GO:0046713	borate transport	27	1	3	1	5	1	1	1	2	1	0	1	0	1	2	1	3	0.546721	4	1	3	1	1	1	0	1	1	1	3	1	1	1	2	1	0	1	0
BP	GO:0046719	regulation by virus of viral protein levels in host cell	8	1	0	1	0	1	0	1	0	1	0	1	0	1	1	1	0	1	0	1	0	1	0	1	0	1	0	1	0	1	0	1	0	1	0	1	0
BP	GO:0046739	transport of virus in multicellular host	10	1	0	0.0866883	5	1	0	1	1	1	0	1	0	1	0	0.03902	5	1	0	0.395392	3	1	0	1	0	1	0	0.0177861	5	1	0	1	1	1	0	1	0
BP	GO:0046740	transport of virus in host, cell to cell	8	0.973113	2	1	0	0.594053	2	1	0	1	0	1	0	1	1	1	0	1	0	1	1	1	0	1	0	1	0	1	0	1	0	1	0	1	0	1	0
BP	GO:0046777	protein autophosphorylation	497	0.27264	60	1	55	1	17	1	27	1	2	1	3	0.463076	42	1	36	1	25	1	36	1	2	1	1	1	31	1	32	1	13	1	21	1	0	1	0
BP	GO:0046785	microtubule polymerization	11	1	0	1	2	1	0	1	1	1	0	1	0	1	0	1	1	1	0	1	0	1	0	1	0	1	0	1	1	1	0	1	0	1	0	1	0
BP	GO:0046786	viral replication complex formation and maintenance	18	1	2	1	1	1	0	1	0	1	0	1	0	1	2	1	0	1	0	1	0	1	0	1	0	1	2	1	0	1	0	1	0	1	0	1	0
BP	GO:0046827	positive regulation of protein export from nucleus	6	1	0	1	0	1	0	1	0	1	0	1	0	1	0	1	0	1	0	1	0	1	0	1	0	1	0	1	0	1	0	1	0	1	0	1	0
BP	GO:0046835	carbohydrate phosphorylation	6	1	1	1	0	1	0	1	0	1	0	1	0	1	0	1	1	1	0	0.582852	2	1	0	1	0	1	0	1	0	1	0	1	0	1	0	1	0
BP	GO:0046854	phosphatidylinositol phosphorylation	7	1	1	1	0	1	0	1	0	1	0	1	0	1	0	1	0	1	0	1	0	1	0	1	0	1	0	1	0	1	0	1	0	1	0	1	0
BP	GO:0046855	inositol phosphate dephosphorylation	83	1	5	1	6	1	1	1	6	1	1	1	0	1	7	1	5	1	0	1	6	1	0	1	0	1	4	1	4	1	0	1	3	1	0	1	0
BP	GO:0046856	phosphatidylinositol dephosphorylation	8	1	1	1	0	1	0	1	0	1	0	1	0	1	1	1	0	1	0	1	0	1	0	1	0	1	1	1	0	1	0	1	0	1	0	1	0
BP	GO:0046900	tetrahydrofolylpolyglutamate metabolic process	4	1	0	1	0	1	0	1	0	1	0	1	0	1	0	1	0	1	0	1	0	1	0	1	0	1	0	1	0	1	0	1	0	1	0	1	0
BP	GO:0046901	tetrahydrofolylpolyglutamate biosynthetic process	6	1	0	0.273916	3	1	0	0.082393	3	1	0	1	0	1	0	0.695989	2	1	0	0.129114	3	1	0	1	0	1	0	0.554927	2	1	0	0.0404298	3	1	0	1	0
BP	GO:0046907	intracellular transport	24	1	0	1	1	1	1	1	0	1	0	1	0	1	0	1	2	1	1	1	0	1	0	1	0	1	0	1	1	1	1	1	0	1	0	1	0
BP	GO:0046916	cellular transition metal ion homeostasis	4	0.377063	2	1	0	0.209999	2	1	0	1	0	1	0	0.268236	2	1	0	0.249794	2	1	0	1	0	1	0	0.212717	2	1	0	0.12629	2	1	0	1	0	1	0
BP	GO:0046938	phytochelatin biosynthetic process	11	1	0	1	1	1	0	1	0	1	0	1	0	1	1	1	1	1	0	1	1	1	0	1	0	1	0	1	1	1	0	1	0	1	0	1	0
BP	GO:0046939	nucleotide phosphorylation	2	1	0	1	0	1	0	1	0	1	0	1	0	1	0	1	0	1	0	1	0	1	0	1	0	1	0	1	0	1	0	1	0	1	0	1	0
BP	GO:0046949	fatty-acyl-CoA biosynthetic process	1	1	0	0.674201	1	1	0	0.557334	1	1	0	1	0	1	0	1	0	1	0	1	0	1	0	1	0	1	0	1	0	1	0	1	0	1	0	1	0
BP	GO:0046967	cytosol to ER transport	6	1	0	1	0	1	0	1	0	1	0	1	0	1	0	1	0	1	0	1	0	1	0	1	0	1	0	1	0	1	0	1	0	1	0	1	0
BP	GO:0047484	regulation of response to osmotic stress	11	1	2	1	0	0.843354	2	1	0	1	0	1	0	1	1	1	0	1	1	1	0	1	0	1	0	1	1	1	0	1	1	1	0	1	0	1	0
BP	GO:0048015	phosphatidylinositol-mediated signaling	8	1	0	0.156681	4	1	0	1	0	1	0	1	0	1	0	0.0888748	4	1	0	0.830673	2	1	0	1	0	1	0	0.0462797	4	1	0	1	0	1	0	1	0
BP	GO:0048016	inositol phosphate-mediated signaling	5	1	0	0.688106	2	1	0	1	0	1	0	1	0	1	0	0.574338	2	1	0	1	0	1	0	1	0	1	0	0.438873	2	1	0	1	0	1	0	1	0
BP	GO:0048024	regulation of mRNA splicing, via spliceosome	2	0.979073	1	1	0	1	0	0.802657	1	1	0	1	0	1	0	1	0	1	0	1	0	1	0	1	0	1	0	1	0	1	0	1	0	1	0	1	0
BP	GO:0048041	focal adhesion assembly	12	1	0	0.456878	4	1	0	1	1	1	0	1	0	1	0	0.712099	3	1	0	0.18399	4	1	0	1	0	1	0	0.529056	3	1	0	1	1	1	0	1	0
BP	GO:0048102	autophagic cell death	8	0.298573	3	1	0	1	1	1	0	1	0	1	0	1	1	1	0	1	1	1	0	1	0	1	0	1	1	1	0	1	1	1	0	1	0	1	0
BP	GO:0048193	Golgi vesicle transport	664	1	54	1	45	1	16	1	17	1	1	1	0	1	41	1	32	1	25	1	27	1	0	1	3	1	34	1	25	1	9	1	14	1	0	1	0
BP	GO:0048194	Golgi vesicle budding	6	1	0	1	0	1	0	1	0	1	0	1	0	1	0	1	0	1	0	1	0	1	0	1	0	1	0	1	0	1	0	1	0	1	0	1	0
BP	GO:0048209	regulation of vesicle targeting, to, from or within Golgi	3	1	0	1	0	1	0	1	0	1	0	1	0	1	0	1	0	1	0	1	0	1	0	1	0	1	0	1	0	1	0	1	0	1	0	1	0
BP	GO:0048219	inter-Golgi cisterna vesicle-mediated transport	5	0.54172	2	1	0	1	0	1	0	1	0	1	0	1	1	1	0	1	0	1	0	1	0	1	0	1	1	1	0	1	0	1	0	1	0	1	0
BP	GO:0048227	plasma membrane to endosome transport	3	1	0	1	0	1	0	1	0	1	0	1	0	1	0	1	0	1	0	1	1	1	0	1	0	1	0	1	0	1	0	1	0	1	0	1	0
BP	GO:0048229	gametophyte development	31	1	0	0.0109622	12	1	0	0.963909	4	1	0	1	0	1	0	0.161117	8	1	0	0.188298	7	1	0	1	0	1	0	0.164349	7	1	0	1	3	1	0	1	0
BP	GO:0048232	male gamete generation	22	1	2	0.0907848	8	1	2	1	3	1	0	1	0	1	0	0.0939284	7	1	1	0.0421869	7	1	0	1	0	1	0	0.0362898	7	1	1	0.665369	3	1	0	1	0
BP	GO:0048235	pollen sperm cell differentiation	43	1	1	1	4	1	1	1	1	1	0	1	0	1	1	1	5	1	2	1	3	1	0	1	0	1	1	1	3	1	0	1	0	1	0	1	0
BP	GO:0048236	plant-type sporogenesis	2	0.979073	1	1	0	1	0	1	0	1	0	1	0	1	0	1	0	1	0	1	0	1	0	1	0	1	0	1	0	1	0	1	0	1	0	1	0
BP	GO:0048240	sperm capacitation	4	1	0	1	0	1	0	1	0	1	0	1	0	1	0	1	0	1	0	1	0	1	0	1	0	1	0	1	0	1	0	1	0	1	0	1	0
BP	GO:0048255	mRNA stabilization	8	0.973113	2	1	0	1	0	1	0	1	0	1	0	0.74504	2	1	0	1	0	1	0	1	0	1	0	0.582956	2	1	0	1	0	1	0	1	0	1	0
BP	GO:0048263	determination of dorsal identity	4	1	0	0.51809	2	1	0	0.273715	2	1	0	1	0	1	0	0.409995	2	1	0	1	1	1	0	1	0	1	0	0.305813	2	1	0	1	1	1	0	1	0
BP	GO:0048281	inflorescence morphogenesis	16	1	0	1	3	1	0	1	1	1	0	1	0	1	1	1	1	1	0	1	1	1	0	1	0	1	0	1	1	1	0	1	0	1	0	1	0
BP	GO:0048283	indeterminate inflorescence morphogenesis	4	1	0	1	0	1	0	1	0	1	0	1	0	1	0	1	0	1	0	1	0	1	0	1	0	1	0	1	0	1	0	1	0	1	0	1	0
BP	GO:0048316	seed development	209	1	10	1	27	1	8	1	14	1	0	1	2	1	5	1	25	1	6	1	14	1	0	1	1	1	5	1	21	1	4	1	7	1	0	1	0
BP	GO:0048317	seed morphogenesis	8	1	0	1	0	1	0	1	0	1	0	1	0	1	0	1	0	1	1	1	0	1	0	1	0	1	0	1	0	1	0	1	0	1	0	1	0
BP	GO:0048354	mucilage biosynthetic process involved in seed coat development	18	1	1	1	2	1	0	0.802657	3	1	0	1	0	1	0	1	1	1	0	1	3	1	0	1	0	1	0	1	1	1	0	1	2	1	0	1	0
BP	GO:0048358	mucilage pectin biosynthetic process	9	1	0	1	0	1	0	1	0	1	0	1	0	1	0	1	0	1	0	1	0	1	0	1	0	1	0	1	0	1	0	1	0	1	0	1	0
BP	GO:0048359	mucilage metabolic process involved in seed coat development	10	1	0	1	2	1	0	1	0	1	0	1	0	1	0	1	2	1	0	1	0	1	0	1	0	1	0	1	2	1	0	1	0	1	0	1	0
BP	GO:0048363	mucilage pectin metabolic process	2	1	0	1	0	1	0	1	0	1	0	1	0	1	0	1	0	1	0	1	0	1	0	1	0	1	0	1	0	1	0	1	0	1	0	1	0
BP	GO:0048364	root development	491	1	34	0.569504	80	1	21	0.37009	45	1	3	1	5	1	25	0.606743	64	1	18	0.0271538	65	1	0	1	0	1	16	0.619144	52	1	8	0.176488	35	1	0	1	0
BP	GO:0048366	leaf development	406	1	28	0.144158	74	1	20	1	25	1	1	0.126622	11	1	26	0.241637	58	1	14	1	37	1	0	1	1	1	20	0.366556	46	1	12	1	21	1	0	1	0
BP	GO:0048367	shoot system development	198	1	10	1	21	1	5	1	8	1	2	1	5	1	7	1	19	1	5	1	11	1	0	1	0	1	4	1	14	1	1	1	4	1	0	1	0
BP	GO:0048437	floral organ development	24	1	1	2.56787e-06	15	1	0	0.0782154	6	1	0	1	0	1	1	0.00373016	10	1	0	0.01801	8	1	0	1	0	1	1	0.00344881	9	1	0	0.0200824	6	1	0	1	0
BP	GO:0048438	floral whorl development	37	1	3	1	6	1	0	1	2	1	0	1	0	1	1	0.960614	6	1	1	0.352954	7	1	0	1	0	1	1	1	4	1	0	1	2	1	0	1	0
BP	GO:0048439	flower morphogenesis	201	1	17	0.00657075	47	1	4	1	16	1	0	1	0	1	10	0.00282602	41	1	6	0.103534	29	1	0	1	0	1	9	0.00925475	33	1	1	1	12	1	0	1	0
BP	GO:0048440	carpel development	199	1	8	1	23	1	6	1	8	1	1	1	0	1	6	1	18	1	3	1	9	1	0	1	0	1	3	1	13	1	1	1	4	1	0	1	0
BP	GO:0048441	petal development	45	1	1	1	7	1	0	1	2	1	0	1	1	1	0	1	5	1	0	1	3	1	0	1	0	1	0	1	4	1	0	1	1	1	0	1	0
BP	GO:0048442	sepal development	10	1	0	1	2	1	0	1	0	1	0	1	0	1	0	1	0	1	0	1	0	1	0	1	0	1	0	1	0	1	0	1	0	1	0	1	0
BP	GO:0048443	stamen development	198	1	15	0.16824	39	0.801148	13	1	10	1	1	1	2	1	12	0.034326	36	1	11	1	20	1	0	1	1	1	9	0.0135533	32	1	8	1	7	1	0	1	0
BP	GO:0048444	floral organ morphogenesis	35	1	5	1	2	0.712605	4	1	0	1	0	1	1	1	4	1	2	0.926819	4	1	1	1	0	1	1	1	3	1	1	0.311278	4	1	0	1	0	1	0
BP	GO:0048445	carpel morphogenesis	10	1	0	1	0	1	0	1	0	1	0	1	0	1	0	1	0	1	0	1	0	1	0	1	0	1	0	1	0	1	0	1	0	1	0	1	0
BP	GO:0048446	petal morphogenesis	16	1	2	1	2	1	0	0.013256	6	1	0	1	0	1	2	1	0	1	0	0.0347691	6	1	0	1	0	1	1	1	0	1	0	0.0193645	5	1	0	1	0
BP	GO:0048448	stamen morphogenesis	2	1	0	1	0	1	0	1	0	1	0	1	0	1	0	1	0	1	0	1	0	1	0	1	0	1	0	1	0	1	0	1	0	1	0	1	0
BP	GO:0048449	floral organ formation	233	1	3	0.157942	45	1	2	1	10	1	0	1	0	1	1	0.409995	34	1	0	0.523017	28	1	0	1	3	1	1	0.555234	27	1	0	1	9	1	0	1	0
BP	GO:0048451	petal formation	164	1	6	1.69471e-08	55	1	2	0.000462658	28	1	0	1	2	1	1	1.30818e-08	48	1	0	3.76393e-06	38	1	0	1	0	1	1	4.5497e-08	41	1	0	0.000706459	22	1	0	1	0
BP	GO:0048453	sepal formation	164	1	6	1.69471e-08	55	1	2	0.000462658	28	1	0	1	2	1	1	1.30818e-08	48	1	0	3.76393e-06	38	1	0	1	0	1	1	4.5497e-08	41	1	0	0.000706459	22	1	0	1	0
BP	GO:0048455	stamen formation	6	1	0	1	0	1	0	1	0	1	0	1	0	1	0	1	0	1	0	1	0	1	0	1	0	1	0	1	0	1	0	1	0	1	0	1	0
BP	GO:0048457	floral whorl morphogenesis	1	1	0	1	0	1	0	1	0	1	0	1	0	1	0	1	0	1	0	1	0	1	0	1	0	1	0	1	0	1	0	1	0	1	0	1	0
BP	GO:0048467	gynoecium development	47	1	0	0.617837	10	1	0	1	4	1	1	1	0	1	0	1	7	1	0	1	4	1	0	1	1	1	0	1	5	1	0	1	3	1	0	1	0
BP	GO:0048479	style development	7	1	0	1	0	1	0	1	0	1	0	1	0	1	0	1	0	1	0	1	0	1	0	1	0	1	0	1	0	1	0	1	0	1	0	1	0
BP	GO:0048480	stigma development	7	1	0	1	0	1	0	1	0	1	0	1	0	1	0	1	0	1	0	1	0	1	0	1	0	1	0	1	0	1	0	1	0	1	0	1	0
BP	GO:0048481	plant ovule development	451	1	32	1	52	1	12	1	18	1	1	1	4	1	28	1	37	1	16	1	28	1	0	1	1	1	21	1	29	1	6	1	11	1	0	1	0
BP	GO:0048482	plant ovule morphogenesis	4	1	0	1	0	1	0	1	0	1	0	1	0	1	0	1	0	1	0	1	0	1	0	1	0	1	0	1	0	1	0	1	0	1	0	1	0
BP	GO:0048497	maintenance of floral organ identity	36	0.74691	6	1	6	1	1	1	0	1	0	1	1	1	1	1	4	1	0	1	1	1	0	1	0	1	1	1	2	1	0	1	0	1	0	1	0
BP	GO:0048498	establishment of petal orientation	3	1	0	1	0	1	0	1	0	1	0	1	0	1	0	1	0	1	0	1	0	1	0	1	0	1	0	1	0	1	0	1	0	1	0	1	0
BP	GO:0048507	meristem development	102	1	4	0.843331	18	1	2	1	2	1	2	1	0	1	4	0.580844	16	1	1	1	9	1	0	1	0	1	2	0.438873	14	1	1	1	2	1	0	1	0
BP	GO:0048508	embryonic meristem development	5	0.101145	3	1	0	1	0	1	0	1	0	1	0	1	1	1	0	1	0	1	0	1	0	1	0	1	1	1	0	1	0	1	0	1	0	1	0
BP	GO:0048509	regulation of meristem development	29	1	2	0.915675	6	1	0	1	0	1	0	1	1	1	1	0.27574	7	1	1	1	1	1	0	1	1	1	1	0.637012	5	1	0	1	0	1	0	1	1
BP	GO:0048510	regulation of timing of transition from vegetative to reproductive phase	95	1	5	0.617837	18	1	0	1	5	1	2	1	0	1	2	0.601712	15	1	0	1	9	1	0	1	0	1	0	1	11	1	0	1	4	1	0	1	0
BP	GO:0048513	animal organ development	73	1	4	1	8	1	0	1	2	1	0	1	0	1	2	1	6	1	2	1	0	1	0	1	0	1	2	1	5	1	0	1	0	1	0	1	0
BP	GO:0048519	negative regulation of biological process	144	1	5	0.000193246	41	1	2	1	11	1	0	1	0	1	3	0.00142068	33	1	4	0.199011	21	1	0	1	0	1	2	0.000289679	30	1	1	1	7	1	0	1	0
BP	GO:0048522	positive regulation of cellular process	93	1	9	1	6	1	3	1	2	1	1	1	0	1	5	1	4	1	3	1	3	0.803874	2	1	0	1	4	1	4	1	2	1	1	1	0	1	0
BP	GO:0048523	negative regulation of cellular process	24	1	2	1	0	1	0	1	0	1	0	1	0	1	2	1	0	1	0	1	0	1	0	1	0	1	2	1	0	1	0	1	0	1	0	1	0
BP	GO:0048527	lateral root development	251	1	25	0.000109953	63	1	11	0.000301518	38	1	1	1	0	0.928506	21	0.258279	38	1	14	0.0403911	37	1	0	1	0	1	16	0.0694269	35	1	8	0.0892159	22	1	0	1	0
BP	GO:0048528	post-embryonic root development	33	1	0	1	4	1	2	1	3	1	0	1	0	1	0	1	4	1	1	1	3	1	0	1	0	1	0	1	4	1	0	1	3	1	0	1	0
BP	GO:0048530	fruit morphogenesis	7	1	0	1	1	1	0	1	0	1	0	1	0	1	0	1	1	1	0	1	1	1	0	1	0	1	0	1	1	1	0	1	0	1	0	1	0
BP	GO:0048544	recognition of pollen	6	1	0	0.845832	2	1	0	1	0	1	0	1	0	1	0	1	0	1	0	1	0	1	0	1	0	1	0	1	0	1	0	1	0	1	0	1	0
BP	GO:0048564	photosystem I assembly	26	1	2	1	4	1	0	1	2	1	0	1	0	1	0	1	3	1	0	1	1	1	0	1	0	1	0	1	3	1	0	1	1	1	0	1	0
BP	GO:0048569	post-embryonic animal organ development	6	1	0	1	0	1	0	1	0	1	0	1	1	1	0	1	0	1	0	1	0	1	0	1	1	1	0	1	0	1	0	1	0	1	0	1	0
BP	GO:0048571	long-day photoperiodism	2	1	0	1	0	1	0	1	0	1	0	1	0	1	0	1	0	0.926819	1	1	0	1	0	1	0	1	0	1	0	1	0	1	0	1	0	1	0
BP	GO:0048572	short-day photoperiodism	2	1	0	1	0	1	0	1	0	1	0	1	0	1	0	1	0	1	0	1	0	1	0	1	0	1	0	1	0	1	0	1	0	1	0	1	0
BP	GO:0048573	photoperiodism, flowering	374	0.000178853	63	1	14	0.00300057	33	1	4	1	2	1	1	0.441516	33	1	10	1	22	1	8	1	0	1	0	0.282408	29	1	9	0.366083	18	1	3	1	0	1	0
BP	GO:0048574	long-day photoperiodism, flowering	73	0.00299005	18	1	3	3.33735e-05	15	1	1	1	0	1	0	0.257999	10	1	2	6.19033e-06	17	1	4	1	0	1	0	0.205512	9	1	1	1.60546e-05	13	1	1	1	0	1	0
BP	GO:0048575	short-day photoperiodism, flowering	14	1	2	1	0	1	1	1	0	1	0	1	0	0.177967	4	1	0	0.416707	3	1	0	1	0	1	0	1	2	1	0	1	1	1	0	1	0	1	0
BP	GO:0048577	negative regulation of short-day photoperiodism, flowering	12	1	2	1	0	1	1	1	0	1	0	1	0	1	1	1	0	1	0	1	0	1	0	1	0	1	1	1	0	1	0	1	0	1	0	1	0
BP	GO:0048578	positive regulation of long-day photoperiodism, flowering	11	1	0	1	0	1	0	1	0	1	0	1	0	1	0	1	0	1	0	1	0	1	0	1	0	1	0	1	0	1	0	1	0	1	0	1	0
BP	GO:0048579	negative regulation of long-day photoperiodism, flowering	14	1	2	1	2	0.0795191	4	1	0	1	0	1	0	1	1	1	0	0.416707	3	1	0	1	0	1	0	1	1	1	0	0.786288	2	1	0	1	0	1	0
BP	GO:0048586	regulation of long-day photoperiodism, flowering	3	1	0	1	0	1	0	1	0	1	0	1	0	1	0	1	0	1	0	1	0	1	0	1	0	1	0	1	0	1	0	1	0	1	0	1	0
BP	GO:0048587	regulation of short-day photoperiodism, flowering	8	1	0	1	0	1	0	1	0	1	0	1	0	1	0	1	1	1	1	1	0	1	0	1	0	1	0	1	0	1	0	1	0	1	0	1	0
BP	GO:0048589	developmental growth	168	1	8	1.51711e-05	49	1	4	0.170502	20	1	1	1	0	1	10	0.510252	25	1	10	0.905322	19	1	0	1	0	1	7	0.136945	24	1	3	1	9	1	0	1	0
BP	GO:0048598	embryonic morphogenesis	13	1	0	1	0	1	0	1	0	1	0	1	1	1	0	1	0	1	0	1	0	1	0	1	0	1	0	1	0	1	0	1	0	1	0	1	0
BP	GO:0048608	reproductive structure development	52	1	6	1	1	1	3	1	0	1	0	1	1	0.476638	7	1	1	1	4	1	0	1	0	1	0	0.933756	5	1	0	1	2	1	0	1	0	1	0
BP	GO:0048629	trichome patterning	7	1	0	1	1	1	0	1	1	1	0	1	0	1	0	0.860715	2	1	0	0.716567	2	1	0	1	0	1	0	1	1	1	0	1	1	1	0	1	0
BP	GO:0048638	regulation of developmental growth	8	1	0	1	0	1	0	0.71992	2	1	0	1	0	1	1	1	0	1	0	0.830673	2	1	0	1	0	1	0	1	0	1	0	0.457844	2	1	0	1	0
BP	GO:0048640	negative regulation of developmental growth	5	1	0	0.688106	2	1	0	1	0	1	0	1	0	1	0	1	1	1	0	1	0	1	0	1	0	1	0	1	1	1	0	1	0	1	0	1	0
BP	GO:0048645	animal organ formation	15	1	0	1	0	1	0	1	1	1	0	1	0	1	0	1	0	1	0	1	0	1	0	1	0	1	0	1	0	1	0	1	0	1	0	1	0
BP	GO:0048653	anther development	182	1	11	0.000154253	49	1	4	0.0709458	23	1	3	1	0	1	8	9.44757e-06	45	1	5	4.53842e-05	38	1	2	1	0	1	6	0.000348812	35	1	2	0.18209	16	0.427023	2	1	0
BP	GO:0048654	anther morphogenesis	1	1	0	1	0	1	0	1	0	1	0	1	0	1	0	1	0	1	0	1	0	1	0	1	0	1	0	1	0	1	0	1	0	1	0	1	0
BP	GO:0048657	anther wall tapetum cell differentiation	14	1	1	1	3	1	1	1	1	1	0	1	0	1	1	1	2	1	0	1	0	1	0	1	0	1	1	1	1	1	0	1	0	1	0	1	0
BP	GO:0048658	anther wall tapetum development	8	1	0	0.0310368	5	1	1	0.71992	2	1	0	1	0	1	1	0.0888748	4	1	1	0.830673	2	1	0	1	0	1	0	0.0462797	4	1	1	0.457844	2	1	0	1	0
BP	GO:0048700	acquisition of desiccation tolerance in seed	7	1	0	1	0	1	0	1	0	1	0	1	0	1	0	1	0	1	0	1	0	1	0	1	0	1	0	1	0	1	0	1	0	1	0	1	0
BP	GO:0048759	xylem vessel member cell differentiation	4	1	0	1	1	1	0	1	0	1	0	1	0	1	0	1	0	1	0	1	0	1	0	1	0	1	0	1	0	1	0	1	0	1	0	1	0
BP	GO:0048765	root hair cell differentiation	480	1	12	3.86933e-10	125	1	1	1.80296e-14	89	1	1	1	2	1	12	0.19876	68	1	10	0.00178338	70	1	1	1	1	1	8	0.0446762	61	1	1	3.30595e-05	50	1	0	1	0
BP	GO:0048766	root hair initiation	21	1	1	0.397777	6	1	0	1	2	1	0	1	0	1	1	1	3	1	0	1	2	1	0	1	0	1	1	1	3	1	0	1	2	1	0	1	0
BP	GO:0048767	root hair elongation	699	1	26	3.30931e-23	206	1	7	1.85262e-08	97	1	0	1	3	1	22	1.78632e-05	122	1	16	3.73092e-05	103	1	0	1	2	1	17	1.46367e-07	110	1	4	7.58695e-07	71	1	0	1	0
BP	GO:0048768	root hair cell tip growth	45	1	2	1	5	1	0	0.690124	6	1	0	1	0	1	1	1	3	1	0	1	4	1	0	1	1	1	0	1	3	1	0	1	1	1	0	1	0
BP	GO:0048825	cotyledon development	227	1	6	1	25	1	3	1	5	1	0	0.0341106	9	1	5	1	21	1	2	1	11	1	0	1	3	1	4	1	12	1	1	1	2	1	0	1	0
BP	GO:0048826	cotyledon morphogenesis	11	1	0	1	0	1	1	1	1	1	0	1	0	1	0	1	0	1	1	1	1	1	0	1	0	1	0	1	0	1	0	1	0	1	0	1	0
BP	GO:0048827	phyllome development	22	1	2	1	0	1	0	1	0	1	1	1	0	1	2	1	1	1	0	1	0	1	0	1	0	1	2	1	0	1	0	1	0	1	0	1	0
BP	GO:0048829	root cap development	48	1	4	0.0287904	15	1	0	1	3	1	1	1	0	1	4	0.0690251	12	1	1	1	5	1	0	1	0	1	4	0.0946384	10	1	0	1	2	1	0	1	0
BP	GO:0048830	adventitious root development	14	1	1	0.0954351	6	1	0	1	0	1	0	1	0	1	1	0.136493	5	1	1	1	1	1	0	1	0	1	0	0.0731674	5	1	0	1	0	1	0	1	0
BP	GO:0048831	regulation of shoot system development	67	0.382621	11	1	2	1	5	1	2	1	2	1	2	1	6	1	2	1	5	1	8	1	0	1	1	1	5	1	1	1	3	1	2	1	0	1	1
BP	GO:0048833	specification of floral organ number	4	1	0	1	1	1	0	1	0	1	0	1	0	1	0	1	0	1	0	1	0	1	0	1	0	1	0	1	0	1	0	1	0	1	0	1	0
BP	GO:0048838	release of seed from dormancy	8	1	0	1	0	1	0	1	0	1	0	1	0	1	1	1	0	1	0	0.830673	2	1	0	1	0	1	0	1	0	1	0	1	0	1	0	1	0
BP	GO:0048864	stem cell development	4	1	0	1	0	1	0	1	0	1	0	1	0	1	0	1	0	1	0	1	0	1	0	1	0	1	0	1	0	1	0	1	0	1	0	1	0
BP	GO:0048867	stem cell fate determination	5	1	0	1	0	1	0	1	0	1	0	1	0	1	0	1	0	1	0	1	0	1	0	1	0	1	0	1	0	1	0	1	0	1	0	1	0
BP	GO:0048868	pollen tube development	77	1	3	0.275923	17	1	2	0.0972305	12	1	0	1	0	1	1	0.730226	12	1	1	1	6	1	0	1	1	1	1	0.500366	11	1	1	1	6	1	0	1	0
BP	GO:0048869	cellular developmental process	25	1	0	6.02936e-08	17	1	0	0.0261589	7	1	0	1	0	1	0	0.0606913	8	1	0	0.481418	5	1	0	1	0	1	0	0.0190019	8	1	0	0.0995286	5	1	0	1	0
BP	GO:0050000	chromosome localization	1	1	0	1	0	1	0	1	0	1	0	1	0	1	0	1	0	1	0	1	0	1	0	1	0	1	0	1	0	1	0	1	0	1	0	1	0
BP	GO:0050665	hydrogen peroxide biosynthetic process	290	1	13	1	35	1	5	1	15	1	4	1	0	1	7	1	27	1	8	1	20	1	2	1	0	1	6	1	19	1	4	1	13	1	1	1	0
BP	GO:0050687	negative regulation of defense response to virus	6	1	0	1	0	1	0	1	0	1	0	1	0	1	0	1	0	1	0	1	0	1	0	1	0	1	0	1	0	1	0	1	0	1	0	1	0
BP	GO:0050688	regulation of defense response to virus	2	1	0	1	0	1	0	0.802657	1	1	0	1	0	1	0	1	0	1	0	1	0	1	0	1	0	1	0	1	0	1	0	1	0	1	0	1	0
BP	GO:0050691	regulation of defense response to virus by host	10	0.00285081	6	1	1	0.00199285	5	1	0	1	0	1	0	0.0075136	5	1	1	0.00297306	5	1	1	1	0	1	0	0.00344591	5	1	1	0.00720859	4	1	0	1	0	1	0
BP	GO:0050708	regulation of protein secretion	1	1	0	1	0	1	0	1	0	1	0	1	0	1	0	1	0	1	0	1	0	1	0	1	0	1	0	1	0	1	0	1	0	1	0	1	0
BP	GO:0050732	negative regulation of peptidyl-tyrosine phosphorylation	5	1	0	0.688106	2	1	0	1	0	1	0	1	0	1	0	1	1	1	0	1	0	1	0	1	0	1	0	1	1	1	0	1	0	1	0	1	0
BP	GO:0050776	regulation of immune response	48	1	6	1	4	1	4	1	0	1	0	1	0	1	4	1	3	1	4	1	0	1	0	1	1	1	4	1	3	1	3	1	0	1	0	1	0
BP	GO:0050790	regulation of catalytic activity	46	1	2	1	6	1	1	1	1	1	0	1	0	1	0	1	6	1	1	1	0	1	1	1	0	1	0	1	5	1	1	1	0	1	0	1	0
BP	GO:0050792	regulation of viral process	11	1	0	1	0	1	0	1	0	1	0	1	0	1	2	1	0	1	0	1	0	1	0	1	0	1	0	1	0	1	0	1	0	1	0	1	0
BP	GO:0050793	regulation of developmental process	8	0.0618777	4	1	0	1	1	1	0	1	0	1	0	1	0	1	0	1	0	1	0	1	0	1	0	1	0	1	0	1	0	1	0	1	0	1	0
BP	GO:0050821	protein stabilization	22	1	0	1	0	1	0	1	1	1	0	1	0	1	1	1	2	1	1	1	2	1	0	1	1	1	0	1	0	1	0	1	1	1	0	1	0
BP	GO:0050826	response to freezing	286	1	16	1	27	1	7	1	5	1	2	1	3	1	10	1	19	1	9	1	11	0.215009	4	1	2	1	7	1	17	1	4	1	3	1	0	1	0
BP	GO:0050829	defense response to Gram-negative bacterium	18	0.591659	4	0.235106	6	1	0	0.3174	4	1	0	1	0	0.289779	4	0.119544	6	1	1	1	3	1	0	1	0	0.596433	3	0.168968	5	1	0	0.457844	3	1	0	1	0
BP	GO:0050832	defense response to fungus	1112	7.69726e-15	193	1	91	0.0613206	67	1	54	1	10	1	4	9.93554e-16	151	1	69	8.52663e-09	106	1	63	1	2	1	3	3.48376e-11	118	1	56	0.0159737	52	1	32	1	0	1	1
BP	GO:0050891	multicellular organismal water homeostasis	2	1	0	0.157942	2	1	0	1	0	1	0	1	0	1	0	0.922643	1	1	0	0.836012	1	1	0	1	0	1	0	0.850511	1	1	0	1	0	1	0	1	0
BP	GO:0050982	detection of mechanical stimulus	16	1	0	0.389061	5	1	0	0.013256	6	1	0	1	0	1	0	1	2	1	0	0.0347691	6	1	0	1	0	1	0	1	2	1	0	0.0193645	5	1	0	1	0
BP	GO:0050994	regulation of lipid catabolic process	11	1	0	1	1	1	0	1	0	1	0	1	0	1	0	1	0	1	0	1	0	1	0	1	0	1	0	1	0	1	0	1	0	1	0	1	0
BP	GO:0051014	actin filament severing	9	1	0	1	1	1	0	1	0	1	0	1	0	1	0	1	0	1	0	1	0	1	0	1	0	1	0	1	0	1	0	1	0	1	0	1	0
BP	GO:0051016	barbed-end actin filament capping	3	1	0	0.33767	2	1	0	1	0	1	0	1	0	1	0	1	0	1	0	1	0	1	0	1	0	1	0	1	0	1	0	1	0	1	0	1	0
BP	GO:0051017	actin filament bundle assembly	38	1	0	1	5	1	0	0.802657	5	1	0	1	0	1	0	1	3	1	0	1	5	1	0	1	0	1	0	1	3	1	0	1	2	1	0	1	0
BP	GO:0051026	chiasma assembly	24	1	2	1	4	1	1	1	1	1	0	1	0	1	1	1	2	1	2	1	2	1	0	1	0	1	1	1	2	1	1	1	1	1	0	1	0
BP	GO:0051049	regulation of transport	45	1	4	1	6	1	4	1	1	1	0	1	0	1	3	1	5	1	4	1	1	1	0	1	0	1	3	1	5	1	2	1	1	1	0	1	0
BP	GO:0051085	chaperone cofactor-dependent protein refolding	8	1	0	1	2	1	0	1	1	1	0	1	1	1	0	1	0	1	0	1	0	1	0	1	0	1	0	1	0	1	0	1	0	1	0	1	0
BP	GO:0051090	regulation of DNA-binding transcription factor activity	3	1	0	1	1	1	0	0.170502	2	1	0	1	0	1	0	0.0237061	3	1	0	0.21553	2	1	0	1	0	1	0	1	1	1	0	0.104387	2	1	0	1	0
[truncated: 2,655 more rows]

## Sheet: -log10_Hyp_up
category	GO ID	GO TERM	totinCat	AV_Root_4h	AV_Root_24h	AV_Leaf_24h	ZS_Root_4h	ZS_Root_24h	ZS_Leaf_24h	both_Root_4h	both_Root_24h	both_Leaf_24h
BP	GO:0010200	response to chitin	1526	50.7371	14.3883	0	52.3882	40.8895	0	38.9036	19.1537	0
BP	GO:0009723	response to ethylene	875	27.0472	9.39426	0	16.5835	9.01505	0	13.5732	9.99426	0
BP	GO:0010286	heat acclimation	285	21.3635	2.08209	0	12.6836	9.68578	1.2393	11.0914	1.95024	0
BP	GO:0002679	respiratory burst involved in defense response	448	20.1937	5.44873	0	26.8825	22.1574	0	17.9791	8.91376	0
BP	GO:0035556	intracellular signal transduction	490	19.8858	7.09353	0	23.6596	12.0123	0	17.3843	9.84168	0
BP	GO:0009753	response to jasmonic acid	952	19.4479	1.37913	0	9.02742	3.10707	0	7.60751	2.22814	0
BP	GO:0009414	response to water deprivation	1140	18.5398	3.27388	1.65841	8.81184	5.49286	0	8.57149	4.30458	0.150308
CC	GO:0009534	chloroplast thylakoid	662	17.3814	0	0	0.118387	0	0	0.61542	0	0
BP	GO:0009611	response to wounding	1135	17.0893	4.24987	0	13.2768	7.90677	0	11.1916	3.82631	0
CC	GO:0009535	chloroplast thylakoid membrane	1000	17.047	0	0	0	0	0	0	0	0
BP	GO:0009744	response to sucrose	724	16.8816	4.99757	0	3.45238	2.33538	0	3.90003	2.45931	0
BP	GO:0009862	systemic acquired resistance, salicylic acid mediated signaling pathway	901	16.6463	6.63762	0	21.7835	13.4749	0	16.3759	8.23143	0
BP	GO:0006612	protein targeting to membrane	1391	16.493	2.2509	0	12.2908	10.4673	0	9.70491	1.79659	0
BP	GO:0010363	regulation of plant-type hypersensitive response	1394	16.4123	2.23546	0	12.2426	11.025	0	9.66567	1.95478	0
BP	GO:0001666	response to hypoxia	216	16.0191	26.6685	0	21.4162	25.825	0	22.7108	29.007	0
BP	GO:0043069	negative regulation of programmed cell death	645	15.972	5.21375	0	19.9138	12.8494	0	16.1355	4.88035	0
BP	GO:0006355	regulation of transcription, DNA-templated	3732	14.9469	14.7271	0	13.5357	19.1761	0	11.4934	15.5251	0
MF	GO:0003700	DNA-binding transcription factor activity	4328	14.5496	15.1965	0	7.41647	15.2113	0	6.75525	13.7511	0
BP	GO:0009695	jasmonic acid biosynthetic process	439	14.4902	3.53431	0	9.54207	3.36553	0	8.46695	3.8798	0
BP	GO:0050832	defense response to fungus	1112	14.1137	1.21239	0	15.0028	8.06922	0	10.458	1.79659	0
BP	GO:0009738	abscisic acid-activated signaling pathway	738	14.059	5.02475	0.286057	10.3579	5.51522	0	8.3192	6.83491	0.392464
BP	GO:0010310	regulation of hydrogen peroxide metabolic process	658	13.3555	6.33443	0	17.7648	13.6325	0	13.6598	7.54419	0
BP	GO:0009737	response to abscisic acid	1531	12.8801	3.53431	1.18098	5.60185	5.49052	0	4.72471	5.02388	0
BP	GO:0009867	jasmonic acid mediated signaling pathway	997	12.8801	0.677782	0	13.9088	4.08111	0	9.39286	0.620698	0
BP	GO:0009061	anaerobic respiration	30	12.7302	14.3883	0	15.6747	9.55248	0	13.0439	12.4879	0
BP	GO:0009620	response to fungus	379	11.9177	1.05368	0	11.6578	3.13707	0	8.57149	1.03812	0
CC	GO:0009507	chloroplast	10279	11.8395	0	0	0	0	0	0.190167	0	0
BP	GO:0009646	response to absence of light	105	11.8188	1.23732	0	4.88607	2.568	0	5.14631	1.02884	0
BP	GO:0009873	ethylene-activated signaling pathway	330	11.2459	6.89715	0.290432	8.02961	5.67831	0	7.8688	4.89318	1.11798
BP	GO:0080167	response to karrikin	426	11.0852	2.22742	0	9.69148	0.498132	0	6.80083	0.451681	0
BP	GO:0031348	negative regulation of defense response	981	10.8411	0.677782	0	13.4279	5.12726	0	8.19198	0.702216	0
BP	GO:0030968	endoplasmic reticulum unfolded protein response	714	10.41	2.85176	0	13.1612	4.55656	0	9.70491	3.83233	0
MF	GO:0008270	zinc ion binding	1545	9.26031	2.05198	0	4.10592	1.80691	0	4.02279	1.47058	0
BP	GO:0010207	photosystem II assembly	517	8.83292	0	0	0.0322153	0	0	0.312975	0	0
BP	GO:0009644	response to high light intensity	677	8.74159	0.257178	0	0.970476	0.106224	0	2.23504	0.164036	0
BP	GO:0006979	response to oxidative stress	593	8.43933	0.96355	0	5.75243	4.3681	0	5.22296	0.817125	0
BP	GO:0009409	response to cold	1510	7.80222	0.19946	0.976806	3.61604	1.18784	0	3.59818	0.388827	0
BP	GO:0000165	MAPK cascade	798	7.72321	0.106013	0	12.2908	3.5248	0	6.42785	0.0517526	0
BP	GO:0009863	salicylic acid mediated signaling pathway	556	7.43974	2.08505	0	8.79287	5.20988	0	6.22148	2.72577	0
BP	GO:0015996	chlorophyll catabolic process	164	7.01067	2.06232	0	3.91348	1.10372	0	4.59803	2.3506	0
BP	GO:0010114	response to red light	330	7.01067	0	0	0.998949	0	0	1.72095	0	0
BP	GO:0010155	regulation of proton transport	252	6.29127	0	0	0	0	0	0	0	0
BP	GO:0042538	hyperosmotic salinity response	548	6.21922	0.07399	1.36581	4.24296	0.223533	0	2.40661	0.574113	0
BP	GO:0007154	cell communication	220	6.19974	0.858167	0	7.15519	1.11753	0	5.94683	0.912007	0
BP	GO:0010224	response to UV-B	310	6.19381	0	0	6.72326	0.498132	0	4.23854	0	0
BP	GO:0007623	circadian rhythm	450	6.1834	9.88879	0	0.533164	9.81574	0	0.718649	10.4368	0
BP	GO:0010264	myo-inositol hexakisphosphate biosynthetic process	187	5.77385	1.10658	0	4.57056	0.447967	0	4.9829	1.41366	0
BP	GO:0009733	response to auxin	1208	5.77385	0.356216	0	3.76639	0.38017	0	2.49808	0.614823	0
BP	GO:0009751	response to salicylic acid	501	5.6776	0.476272	0	3.48263	1.44125	0	2.72189	0.316936	0
BP	GO:0015995	chlorophyll biosynthetic process	372	5.67692	0.591268	0	2.22447	0.0149588	0	2.5381	0.0729081	0
BP	GO:0031347	regulation of defense response	354	5.13242	1.69913	0	2.10986	4.15742	0	1.79736	1.31727	0
BP	GO:0006914	autophagy	229	4.85345	0.0194391	0	1.57986	0.702214	0	0.639473	0.301875	0
BP	GO:0042793	plastid transcription	220	4.57064	0	0	1.03866	0	0	1.2006	0	0
BP	GO:0034059	response to anoxia	6	4.45764	5.96221	0	5.29586	5.75699	0	5.78454	6.99803	0
BP	GO:0010629	negative regulation of gene expression	11	4.416	0.677782	0	0	1.31961	0	0	1.01065	0
BP	GO:0009750	response to fructose	517	4.26357	2.36184	0.290432	0.0322153	0.446311	0	0.420595	0.229934	0
BP	GO:0030154	cell differentiation	432	4.17355	0.88912	0	0.659701	0.0586702	0	1.42443	0	0
BP	GO:0045893	positive regulation of transcription, DNA-templated	1323	4.06976	0.517342	0	0	0	0	0.581239	0	0
BP	GO:0009637	response to blue light	334	4.06976	0	0	0	0	0	0.10562	0	0
BP	GO:0009773	photosynthetic electron transport in photosystem I	195	4.044	0.128448	0	0.647116	0	0	1.16916	0	0
BP	GO:0010218	response to far red light	320	4.03354	0	0	0.618891	0	0	1.2006	0	0
BP	GO:0080153	negative regulation of reductive pentose-phosphate cycle	12	4.03354	0	0	0	0	0	0.045721	0	0
BP	GO:0009408	response to heat	744	3.96284	0	0	2.23032	0.445417	0	3.79355	0	0
BP	GO:0042542	response to hydrogen peroxide	612	3.90488	0	0	0.410371	0.266611	0	0.96349	0	0
BP	GO:0048573	photoperiodism, flowering	374	3.7475	2.5228	0	0.355053	0	0	0.549123	0.436421	0
BP	GO:0009693	ethylene biosynthetic process	321	3.6991	2.017	0	3.28719	5.98485	0	1.9045	3.29508	0
BP	GO:0009657	plastid organization	299	3.66485	0	0	0	0	0	0	0	0
BP	GO:0043617	cellular response to sucrose starvation	10	3.62601	0.752608	0	1.1778	0.0586702	0	1.42443	0.301875	0
BP	GO:0072708	response to sorbitol	5	3.55372	4.76543	0	4.20444	4.61341	0	4.59803	5.51256	0
BP	GO:0032268	regulation of cellular protein metabolic process	5	3.55372	0	0	4.20444	0	0	4.59803	0	0
BP	GO:0044265	cellular macromolecule catabolic process	40	3.46695	0	0	0	0	0	0	0	0
BP	GO:0019288	isopentenyl diphosphate biosynthetic process, methylerythritol 4-phosphate pathway	735	3.36615	0	0	1.03398	0	0	1.30926	0	0
BP	GO:0010017	red or far-red light signaling pathway	87	3.31481	0.0953629	0	0.550865	0	0	0.672199	0	0
BP	GO:0034605	cellular response to heat	47	3.24568	0	0	4.23371	0.770142	2.79289	2.29854	0	0
BP	GO:0052542	defense response by callose deposition	163	3.15683	0.464284	0	6.48048	3.0184	0	4.61447	1.45918	0
BP	GO:0034660	ncRNA metabolic process	251	3.15683	0	0	1.07484	0	0	1.36407	0	0
BP	GO:0035304	regulation of protein dephosphorylation	486	3.03643	0	0	0.432971	0	0	0.181979	0	0
BP	GO:0071456	cellular response to hypoxia	55	2.99508	5.21375	0	6.38918	12.0123	0	4.43117	7.21972	0
BP	GO:0010304	PSII associated light-harvesting complex II catabolic process	85	2.99508	0	0	0.831829	0	0	1.36527	0	0
BP	GO:0009755	hormone-mediated signaling pathway	145	2.99508	0	0	0.0143415	0	0	0.367952	0	0
BP	GO:0009612	response to mechanical stimulus	174	2.97324	1.37207	0	2.65445	1.86266	0	1.96961	1.28524	0
CC	GO:0031977	thylakoid lumen	147	2.96955	0	0	0	0	0	0	0	0
BP	GO:0006552	leucine catabolic process	12	2.96778	0.0506336	0	0.970476	0	0	1.2006	0	0
BP	GO:0006098	pentose-phosphate shunt	608	2.95356	0	0	0.431198	0	0	0.625561	0	0
CC	GO:0009579	thylakoid	753	2.91145	0	0	0	0	0	0	0	0
BP	GO:0009963	positive regulation of flavonoid biosynthetic process	409	2.90879	0.752608	0	1.06854	1.43666	0	0.967151	0.794257	0
BP	GO:0007165	signal transduction	1032	2.90011	1.37443	0	1.34901	0	0	0.865199	0.323705	0.215662
BP	GO:0009813	flavonoid biosynthetic process	176	2.89528	0.128448	0	3.37726	0.189222	0	1.55069	0	0
BP	GO:0009413	response to flooding	9	2.86626	2.95751	0	3.59163	2.78126	0	4.05897	3.72205	0
BP	GO:0006904	vesicle docking involved in exocytosis	63	2.81895	0	0	3.39093	0	0	2.43321	0	0
BP	GO:0072593	reactive oxygen species metabolic process	46	2.79285	3.62986	0	1.74216	2.51015	0	2.36716	4.24413	0
BP	GO:0010027	thylakoid membrane organization	600	2.75388	0	0	0.296219	0	0	0.31522	0	0
BP	GO:0010105	negative regulation of ethylene-activated signaling pathway	41	2.74602	0	0	4.21336	0	0	3.52679	0	0
BP	GO:0010555	response to mannitol	36	2.70952	0.952789	0	0.530108	0.770142	0	0.790761	1.00252	0
BP	GO:0016117	carotenoid biosynthetic process	328	2.68016	0	0	0.300308	0	0	0.387932	0	0
BP	GO:0015727	lactate transport	4	2.66364	3.53431	0	3.11067	3.39851	0	3.41317	4.15674	0
BP	GO:0050691	regulation of defense response to virus by host	10	2.54503	2.70053	0	2.12415	2.5268	0	2.4627	2.14215	0
BP	GO:0048574	long-day photoperiodism, flowering	73	2.52432	4.4766	0	0.588383	5.20829	0	0.687163	4.7944	0
BP	GO:0009739	response to gibberellin	309	2.52432	0.143348	0	0.613844	0.189222	0	0.904542	0.301875	0
BP	GO:0080024	indolebutyric acid metabolic process	18	2.52432	0	0	1.6909	0	0	2.09479	0	0
MF	GO:0004033	aldo-keto reductase (NADP) activity	25	2.51561	0	0	4.10592	0	0	3.82389	0	0
MF	GO:0008113	peptide-methionine (S)-S-oxide reductase activity	25	2.51561	0	0	2.38893	0	0	2.18538	0	0
CC	GO:0009543	chloroplast thylakoid lumen	195	2.49965	0	0	0	0	0	0	0	0
BP	GO:0070838	divalent metal ion transport	318	2.49538	0.744772	0	0	0	0	0	0	0
BP	GO:0019481	L-alanine catabolic process, by transamination	7	2.46764	3.58547	0	3.03486	3.41152	0	3.41317	4.34348	0
BP	GO:0009902	chloroplast relocation	311	2.46764	0	0	0.475492	0	0	0.553497	0	0
BP	GO:0006865	amino acid transport	418	2.46158	0.677782	0	1.74216	2.90482	0	1.42258	0.51378	0
BP	GO:0010337	regulation of salicylic acid metabolic process	23	2.46055	2.67586	0	5.42418	2.42627	0	3.19048	2.63749	0
CC	GO:0035061	interchromatin granule	13	2.45838	0.0819469	0	0	0	0	0	0	0
BP	GO:0009595	detection of biotic stimulus	394	2.44168	0	0	2.51157	0.633071	0	1.58036	0	0
BP	GO:0009694	jasmonic acid metabolic process	136	2.42294	0	0	0	0	0	0.28577	0	0
BP	GO:0016558	protein import into peroxisome matrix	305	2.42097	0.321654	0	0.550865	0.554137	0	0.802759	0	0
BP	GO:0046482	para-aminobenzoic acid metabolic process	115	2.42097	0	0	0.219053	0	0.774888	0.384379	0	0
BP	GO:0006970	response to osmotic stress	465	2.34706	0.932993	0	2.00491	3.11388	0	2.10116	2.00095	0
BP	GO:0043900	regulation of multi-organism process	365	2.33628	0	0	2.38916	0.602418	0	1.35856	0	0
BP	GO:0009697	salicylic acid biosynthetic process	745	2.31673	0	0	4.21336	1.43666	0	1.90889	0	0
BP	GO:0080026	response to indolebutyric acid	11	2.31168	0.07399	0	0.480687	0.0330049	0	0.634074	0.234129	0
BP	GO:0009267	cellular response to starvation	15	2.31168	0	0	0	0	0	0	0	0
BP	GO:0009651	response to salt stress	2501	2.2674	1.7718	0	1.74216	1.90775	0.251368	2.60759	2.63749	0
BP	GO:0010189	vitamin E biosynthetic process	20	2.20976	0	0	0	0	0	0	0	0
BP	GO:0009954	proximal/distal pattern formation	41	2.20484	0	0	0.647116	0	0	0.980291	0	0
BP	GO:0080037	negative regulation of cytokinin-activated signaling pathway	8	2.14401	0.952789	0	0.718834	0	0	0.902553	0	0
BP	GO:0071483	cellular response to blue light	16	2.11845	0	0	5.00392	0	0	3.40241	0.0327241	0
BP	GO:0009626	plant-type hypersensitive response	121	2.11611	0.874511	0	2.4444	2.85195	0	1.73272	1.50343	0
BP	GO:0019433	triglyceride catabolic process	5	2.10617	0	0	0	0	0	0	0	0
BP	GO:1902000	homogentisate catabolic process	12	2.08787	2.31016	0	0.970476	1.18784	0	1.2006	1.84174	0
BP	GO:0019375	galactolipid biosynthetic process	284	2.08787	0.926149	0	2.76319	0.00884596	0	2.43321	0.294741	0
BP	GO:0071492	cellular response to UV-A	12	2.08787	0	0	3.83247	0	0	2.08391	0	0
BP	GO:0010099	regulation of photomorphogenesis	26	2.07205	0.0310829	0	1.53842	0	0	1.30926	0	0
BP	GO:0015749	monosaccharide transmembrane transport	17	1.95109	0	0	1.07144	0.209518	0	1.38126	0	0
BP	GO:0010117	photoprotection	22	1.92152	0.128448	0	2.74887	0.0330049	0	1.62552	0.388827	0
MF	GO:0004457	lactate dehydrogenase activity	4	1.88615	2.75348	0	2.38893	2.64778	0	2.64361	3.37624	0
MF	GO:0015129	lactate transmembrane transporter activity	4	1.88615	2.75348	0	2.38893	2.64778	0	2.64361	3.37624	0
MF	GO:0004022	alcohol dehydrogenase (NAD) activity	20	1.88615	0.485251	0	1.10524	0.430329	0	1.45652	0.894032	0
MF	GO:0003674	molecular_function	12282	1.88615	0	0	0.157833	0	0	0.295419	0	0
MF	GO:0003868	4-hydroxyphenylpyruvate dioxygenase activity	4	1.88615	0.485251	0	0	0	0	0	0	0
MF	GO:0004760	serine-pyruvate transaminase activity	4	1.88615	0	0	0	0	0	0	0	0
MF	GO:0050281	serine-glyoxylate transaminase activity	4	1.88615	0	0	0	0	0	0	0	0
MF	GO:0016710	trans-cinnamate 4-monooxygenase activity	10	1.83094	0	0	1.64531	0	0	1.95429	0	0
MF	GO:0004176	ATP-dependent peptidase activity	54	1.83094	0	0	0.889338	0	0	0.963107	0	0
MF	GO:0004396	hexokinase activity	18	1.82535	1.2311	0	2.54077	2.33835	0	3.15164	1.71702	0
MF	GO:0090353	polygalacturonase inhibitor activity	14	1.81883	1.65555	0	1.65571	0.21832	0	2.18538	0.557664	0
BP	GO:0009617	response to bacterium	585	1.81835	0	0	1.41402	1.05194	0	0.910823	0	0
BP	GO:0030003	cellular cation homeostasis	360	1.81114	0.35166	0	0	0	0	0	0	0
BP	GO:0042343	indole glucosinolate metabolic process	23	1.78816	0.546573	0	2.62445	3.26756	0	2.30962	0.95582	0
BP	GO:0010585	glutamine secretion	3	1.78816	0.858167	0	2.05483	2.29098	0	2.25012	1.1054	0
BP	GO:2000121	regulation of removal of superoxide radicals	3	1.78816	0.858167	0	0.718834	0.793873	0	0.845294	1.1054	0
BP	GO:0006778	porphyrin-containing compound metabolic process	3	1.78816	0	0	0	0.793873	0	0.0019106	0.00456138	0
BP	GO:0035265	organ growth	34	1.7822	1.0497	0	2.1053	0.0586702	0	2.67418	0.536324	0
CC	GO:0031090	organelle membrane	12	1.74526	0	0	0.149562	0.827276	0	0.61542	0	0
BP	GO:0009686	gibberellin biosynthetic process	79	1.74131	0	0	0.705254	0	0	0.277821	0	0
BP	GO:0010729	positive regulation of hydrogen peroxide biosynthetic process	6	1.71994	0	0	0.310555	0	0	0.39634	0	0
BP	GO:0071454	cellular response to anoxia	6	1.71994	0	0	0.310555	0	0	0.39634	0	0
MF	GO:0004805	trehalose-phosphatase activity	39	1.71184	0.198796	0	1.26199	0.890286	0	1.79333	0.645932	0
BP	GO:0009864	induced systemic resistance, jasmonic acid mediated signaling pathway	35	1.6902	0.546395	0	1.39994	0.394438	0	1.30147	1.03486	0
BP	GO:0009743	response to carbohydrate	80	1.6902	0	0	0.993187	0	0.163036	0.832569	0	0.858762
BP	GO:0042754	negative regulation of circadian rhythm	10	1.64284	0	0	0.034738	0	0	0.129187	0	0
BP	GO:2000032	regulation of secondary shoot formation	10	1.64284	0	0	0	0	0	0	0	0
CC	GO:0010008	endosome membrane	22	1.62978	1.40961	0	0	0	0	0.145864	0	0
CC	GO:0016607	nuclear speck	85	1.56691	0.716152	0	0	0.827276	0	0	0.60568	0
CC	GO:0030093	chloroplast photosystem I	18	1.56691	0	0	0	0	0	0	0	0
BP	GO:0009835	fruit ripening	15	1.52426	0	0	0.683767	0	0	0.902553	0	0
BP	GO:0010206	photosystem II repair	31	1.51194	0	0	0.33318	0	0	0.172731	0	0
MF	GO:0004768	stearoyl-CoA 9-desaturase activity	5	1.46857	2.35795	0	1.80419	2.12562	0	2.18538	2.9093	0
MF	GO:0016157	sucrose synthase activity	16	1.46857	2.17957	0	1.54251	1.84961	0	1.89598	1.91316	0
MF	GO:0008398	sterol 14-demethylase activity	5	1.46857	1.2311	0	0.889338	1.06225	0	1.09833	1.58453	0
MF	GO:0016229	steroid dehydrogenase activity	12	1.46857	0	0	1.32114	0	0	1.66038	0	0
MF	GO:0070401	NADP+ binding	12	1.46857	0	0	1.32114	0	0	1.66038	0	0
BP	GO:0009585	red, far-red light phototransduction	50	1.45978	0	0	0.0896541	0	0	0.065007	0	0
BP	GO:0051603	proteolysis involved in cellular protein catabolic process	11	1.42735	0	0	1.0538	0	0	1.30926	0	0
CC	GO:0009941	chloroplast envelope	1793	1.42316	0	0	0	0	0	0	0	0
BP	GO:0032508	DNA duplex unwinding	21	1.38832	0.147805	0	0	0.506906	0	0	0.436421	0
BP	GO:0006364	rRNA processing	766	1.36	0	0	0	0	0	0	0	0
BP	GO:0042742	defense response to bacterium	1368	1.35676	0	0	2.29887	2.29315	0	0.96349	0	0
MF	GO:0000156	phosphorelay response regulator activity	89	1.3405	1.93864	0	1.64531	1.31426	0	1.26292	1.18502	0
MF	GO:0016168	chlorophyll binding	96	1.3405	0	0	0.591136	0	0	0.240487	0	0
CC	GO:0009654	photosystem II oxygen evolving complex	37	1.32166	0	0	0	0	0	0	0	0
MF	GO:0004737	pyruvate decarboxylase activity	9	1.3084	2.35795	0	1.70829	2.12562	0	2.18538	2.98127	0
MF	GO:0009973	adenylyl-sulfate reductase activity	9	1.3084	0	0	5.59672	0	0	2.18538	0	0
BP	GO:0051928	positive regulation of calcium ion transport	4	1.29069	0.677782	0	0.571482	0.602418	0	0.672199	0.89863	0
BP	GO:0046369	galactose biosynthetic process	4	1.29069	0.677782	0	0.571482	0	0	0.672199	0	0
BP	GO:0009063	cellular amino acid catabolic process	4	1.29069	0	0	0.571482	0	0	0.672199	0	0
BP	GO:0030974	thiamine pyrophosphate transmembrane transport	4	1.29069	0	0	0.571482	0	0	0.672199	0	0
BP	GO:0032107	regulation of response to nutrient levels	4	1.29069	0.677782	0	0	0	0	0	0	0
BP	GO:0043620	regulation of DNA-templated transcription in response to stress	4	1.29069	0.677782	0	0	0	0	0	0	0
BP	GO:0046470	phosphatidylcholine metabolic process	4	1.29069	0	0	0	0	0	0	0	0
BP	GO:0061416	regulation of transcription from RNA polymerase II promoter in response to salt stress	4	1.29069	0	0	0	0	0	0	0	0
MF	GO:0016040	glutamate synthase (NADH) activity	3	1.28329	0	0	1.62386	1.76275	0	1.79333	0	0
MF	GO:0004411	homogentisate 1,2-dioxygenase activity	3	1.28329	1.96433	0	0.557579	0.650042	0	0.623846	0.892745	0
MF	GO:0010277	chlorophyllide a oxygenase [overall] activity	3	1.28329	0	0	0.557579	0	0	0.623846	0	0
MF	GO:0046982	protein heterodimerization activity	165	1.28329	0	0	0	0	0	0	0	0
CC	GO:0000145	exocyst	85	1.27976	0	0	1.82513	0	0	0.61542	0	0
BP	GO:0005992	trehalose biosynthetic process	53	1.27201	0.0987003	0	0.921924	0.584322	0	1.35856	0.506775	0
BP	GO:0009658	chloroplast organization	473	1.27048	0	0	0	0	0	0.270679	0	0
BP	GO:0071398	cellular response to fatty acid	12	1.27013	2.31016	0	0.970476	2.15658	0	1.2006	3.03077	0
BP	GO:0009073	aromatic amino acid family biosynthetic process	206	1.26536	0	0	0	0	0	0.0634734	0	0
BP	GO:0070370	cellular heat acclimation	28	1.26462	0	0	1.35677	0.223533	0.774888	0.673404	0	0
BP	GO:0045087	innate immune response	342	1.26029	0.0607501	0	1.3807	1.08681	0	0.710152	0.910802	0
BP	GO:0009416	response to light stimulus	555	1.26029	0	0	0.544376	0	0	0.515658	0	0
CC	GO:0005776	autophagosome	7	1.25581	0	0	0	0	0	0	0	0
MF	GO:0032453	histone demethylase activity (H3-K4 specific)	6	1.24208	2.11742	0	1.63513	1.84961	0	1.89598	2.52153	0
MF	GO:0047746	chlorophyllase activity	6	1.24208	0	0	0.814127	0	0	0.960525	0	0
MF	GO:0050242	pyruvate, phosphate dikinase activity	6	1.24208	0	0	0.155026	0	0	0.209838	0	0
BP	GO:0010248	establishment or maintenance of transmembrane electrochemical gradient	8	1.20847	0.952789	0	0.718834	0.172639	0	0.902553	0.439897	0
BP	GO:0031539	positive regulation of anthocyanin metabolic process	8	1.20847	0	0	1.55137	0	0	1.81747	0	0
BP	GO:0010270	photosystem II oxygen evolving complex assembly	8	1.20847	0	0	0	0	0	0	0	0
BP	GO:0050793	regulation of developmental process	8	1.20847	0	0	0	0	0	0	0	0
CC	GO:0030095	chloroplast photosystem II	59	1.20188	0	0	0	0	0	0	0	0
MF	GO:0050403	trans-zeatin O-beta-D-glucosyltransferase activity	10	1.1888	0	0	1.64531	1.09443	0	1.10182	0	0
MF	GO:0050502	cis-zeatin O-beta-D-glucosyltransferase activity	10	1.1888	0	0	1.64531	1.09443	0	1.10182	0	0
MF	GO:0051740	ethylene binding	10	1.1888	0	0	0.863465	0	0	1.10182	0	0
BP	GO:0000303	response to superoxide	113	1.18519	0	0.221055	0.664702	0	0.774888	0.672199	0	2.20803
BP	GO:0009767	photosynthetic electron transport chain	42	1.13995	0.0189718	0	0.034738	0	0	0.216567	0	0
BP	GO:0010204	defense response signaling pathway, resistance gene-independent	49	1.11416	0	0	0.115018	0	0	0.360293	0	0
BP	GO:0009631	cold acclimation	100	1.08957	0	0	0	0	0.0455954	0	0	0
BP	GO:0009741	response to brassinosteroid	255	1.08413	0	0	1.23445	0	0	1.30926	0	0
CC	GO:0042651	thylakoid membrane	41	1.07846	0	0	0.0998517	0	0	0.537895	0	0
MF	GO:0003999	adenine phosphoribosyltransferase activity	15	1.07755	1.54905	0	0.0814288	1.23425	0	0.172113	2.0196	0
BP	GO:0006655	phosphatidylglycerol biosynthetic process	205	1.06813	0	0	1.63479	0	0	0.963173	0	0
MF	GO:0008194	UDP-glycosyltransferase activity	213	1.06324	1.05056	0	1.02895	0.140595	0	0.960525	0.446174	0
BP	GO:0006464	cellular protein modification process	72	1.00787	0	0	1.70917	0	0	1.05663	0	0
BP	GO:0015908	fatty acid transport	9	1.00787	0	0	0.618891	0	0	0.804431	0	0
MF	GO:0003913	DNA photolyase activity	11	0.996473	0	0	0.82514	0	0	0.410322	0	0
BP	GO:0016310	phosphorylation	80	0.995053	0	0	0.677422	0	0	0.526416	0	0
BP	GO:0006792	regulation of sulfur utilization	5	0.995053	0	0	0.419404	0	0	0	0	0
BP	GO:0043335	protein unfolding	5	0.995053	0	0	0.419404	0	0	0.512734	0	0
BP	GO:0090391	granum assembly	5	0.995053	0	0	0.419404	0	0	0.512734	0	0
BP	GO:0009800	cinnamic acid biosynthetic process	5	0.995053	0	0	0	0	0	0	0	0
BP	GO:0009892	negative regulation of metabolic process	5	0.995053	0	0	0	0	0	0	0	0
BP	GO:0048508	embryonic meristem development	5	0.995053	0	0	0	0	0	0	0	0
BP	GO:2000693	positive regulation of seed maturation	14	0.995053	0	0	0	0	0	0	0	0
BP	GO:0006144	purine nucleobase metabolic process	2	0.94696	1.17111	0	1.0538	1.17084	0	1.2006	1.45918	0
BP	GO:1901918	negative regulation of exoribonuclease activity	2	0.94696	1.17111	0	1.0538	1.17084	0	1.2006	1.45918	0
BP	GO:0016116	carotenoid metabolic process	2	0.94696	0.0596455	0	1.0538	1.17084	0	1.2006	0.115325	0
BP	GO:0031062	positive regulation of histone methylation	2	0.94696	0.0596455	0	1.0538	1.17084	0	1.2006	0.115325	0
BP	GO:0010941	regulation of cell death	2	0.94696	1.17111	0	0	1.17084	0	0	1.45918	0
BP	GO:0006573	valine metabolic process	2	0.94696	0	0	1.0538	0.0330049	0	1.2006	0	0
BP	GO:0010094	specification of carpel identity	2	0.94696	0	0	0.0462911	0.0330049	0	0.112261	0	0
BP	GO:0015690	aluminum cation transport	2	0.94696	0	0	0	0.0330049	0	0	0	0
BP	GO:0019379	sulfate assimilation, phosphoadenylyl sulfate reduction by phosphoadenylyl-sulfate reductase (thioredoxin)	2	0.94696	0	0	1.0538	0	0	1.2006	0	0
BP	GO:0009688	abscisic acid biosynthetic process	74	0.94696	0	0	0.857724	0	0	0.672199	0	0
BP	GO:0019450	L-cysteine catabolic process to pyruvate	2	0.94696	1.17111	0	0.0462911	0	0	0.112261	0	0
BP	GO:0002764	immune response-regulating signaling pathway	2	0.94696	0	0	0.0462911	0	0	0.112261	0	0
BP	GO:0009083	branched-chain amino acid catabolic process	2	0.94696	0	0	0.0462911	0	0	0.112261	0	0
BP	GO:0010241	ent-kaurene oxidation to kaurenoic acid	2	0.94696	0	0	0.0462911	0	0	0.112261	0	0
BP	GO:0042548	regulation of photosynthesis, light reaction	2	0.94696	0	0	0.0462911	0	0	0.112261	0	0
BP	GO:0006635	fatty acid beta-oxidation	577	0.94696	0	0	0	0	0	0	0	0
BP	GO:0007275	multicellular organism development	368	0.94696	0	0	0	0	0	0	0	0
BP	GO:0009870	defense response signaling pathway, resistance gene-dependent	60	0.930516	0	0	0.125421	0	0	0.129187	0	0
BP	GO:0009740	gibberellic acid mediated signaling pathway	187	0.919822	0.186545	0	1.23445	0	0	0.816307	0	0
MF	GO:0080025	phosphatidylinositol-3,5-bisphosphate binding	27	0.91357	0	0	0.0138669	0.55647	0	0.123764	0	0
MF	GO:0004168	dolichol kinase activity	4	0.91357	0.485251	0	1.16859	0.457616	0	1.38193	0.664708	0
MF	GO:0016312	inositol bisphosphate phosphatase activity	4	0.91357	0	0	1.16859	0	0	1.38193	0	0
MF	GO:0015145	monosaccharide transmembrane transporter activity	27	0.91357	0	0	0.680325	0	0	0.960525	0	0
MF	GO:0009540	zeaxanthin epoxidase [overall] activity	4	0.91357	0	0	0.399099	0	0	0.452192	0	0
MF	GO:0090422	thiamine pyrophosphate transmembrane transporter activity	4	0.91357	0	0	0.399099	0	0	0.452192	0	0
MF	GO:0003955	NAD(P)H dehydrogenase (quinone) activity	4	0.91357	0.485251	0	0	0	0	0	0	0
MF	GO:0004142	diacylglycerol cholinephosphotransferase activity	4	0.91357	0	0	0	0	0	0	0	0
BP	GO:0006457	protein folding	852	0.911604	0	0	0	0	0	0.172731	0	0
BP	GO:0000304	response to singlet oxygen	15	0.910187	0	0	0.219053	0	0	0.364223	0	0
BP	GO:0015743	malate transport	15	0.910187	0	0	0	0	0	0	0	0
BP	GO:0043562	cellular response to nitrogen levels	21	0.875803	0.147805	0.0541144	0	0.0586702	0	0	0	0
BP	GO:0071486	cellular response to high light intensity	21	0.875803	0	0	2.09685	0	0	1.06839	0	0
BP	GO:0015867	ATP transport	21	0.875803	0.147805	0	0.777146	0	0	1.06839	0	0
MF	GO:0080032	methyl jasmonate esterase activity	17	0.872197	0	0	0.0157658	0	0	0.0921816	0	0
BP	GO:0009610	response to symbiotic fungus	140	0.845042	0	0	0.585139	0	0	0	0	0
BP	GO:0006839	mitochondrial transport	124	0.837643	0	0	0.667513	0	0	0.96349	0	0
MF	GO:0050373	UDP-arabinose 4-epimerase activity	8	0.834658	0.0188306	0	0.557579	0	0	0.0919737	0	0
MF	GO:0003863	3-methyl-2-oxobutanoate dehydrogenase (2-methylpropanoyl-transferring) activity	8	0.834658	0	0	0	0	0	0	0	0
MF	GO:0004352	glutamate dehydrogenase (NAD+) activity	8	0.834658	0	0	0	0	0	0	0	0
MF	GO:0008453	alanine-glyoxylate transaminase activity	23	0.828087	0	0	0	0	0	0	0	0
MF	GO:0009055	electron transfer activity	128	0.824273	0	0	1.80419	1.2061	0	2.18538	0	0
CC	GO:0005634	nucleus	22337	0.814985	1.56455	0	0	0.827276	0	0	1.21683	0
BP	GO:0015967	diadenosine tetraphosphate catabolic process	6	0.807934	4.07301	0	1.02946	2.42889	0	1.2006	3.12032	0
BP	GO:0080143	regulation of amino acid export	16	0.807934	0.351855	0	1.1778	1.53579	0	0.845294	0.666799	0
BP	GO:0010247	detection of phosphate ion	6	0.807934	0	0	1.02946	0.350378	0	0.39634	0	0
BP	GO:0090352	regulation of nitrate assimilation	6	0.807934	0	0	1.02946	0.350378	0	0.39634	0	0
BP	GO:0032527	protein exit from endoplasmic reticulum	16	0.807934	0.351855	0	1.1778	0.262234	0	0.845294	0.666799	0
BP	GO:0010602	regulation of 1-aminocyclopropane-1-carboxylate metabolic process	6	0.807934	0	0	2.10348	0	0	1.2006	0	0
BP	GO:0019725	cellular homeostasis	6	0.807934	0	0	0.310555	0	0	0.39634	0	0
BP	GO:0035672	oligopeptide transmembrane transport	6	0.807934	0	0	0	0	0	0	0	0
BP	GO:0090421	embryonic meristem initiation	6	0.807934	0	0	0	0	0	0	0	0
BP	GO:0010029	regulation of seed germination	159	0.787521	1.04251	0	0	0.903515	0	0	1.16502	0
BP	GO:0000160	phosphorelay signal transduction system	35	0.787113	0.147151	0	1.39994	0.394438	0.669828	0.823994	0.506851	0
BP	GO:0010260	animal organ senescence	94	0.787113	0	0	0	0	0	0	0	0
MF	GO:0016174	NAD(P)H oxidase activity	13	0.774254	1.80222	0	1.16909	1.5173	0	1.49106	2.31535	0
MF	GO:0003978	UDP-glucose 4-epimerase activity	13	0.774254	0	0	0.665672	0	0	0.258955	0	0
BP	GO:0072334	UDP-galactose transmembrane transport	11	0.76947	0	0	0.480687	0.0330049	0	0.634074	0	0
BP	GO:0042753	positive regulation of circadian rhythm	11	0.76947	0	0	1.0538	0	0	1.30926	0	0
BP	GO:0071333	cellular response to glucose stimulus	11	0.76947	0	0	0	0	0	0	0	0
BP	GO:0042744	hydrogen peroxide catabolic process	273	0.752162	0	0	0.469121	0	0	0.652995	0	0
CC	GO:0005673	transcription factor TFIIE complex	2	0.737178	0	0	0	0.827276	0	0	0	0
CC	GO:0031012	extracellular matrix	33	0.737178	0	0	0	0.12843	0	0.145864	0	0
BP	GO:0010120	camalexin biosynthetic process	36	0.724389	0	0	0.864813	0.365138	0	0.383346	0	0
BP	GO:0006809	nitric oxide biosynthetic process	17	0.720578	0	0	1.81535	1.43666	0	1.38126	0	0
BP	GO:0010107	potassium ion import	17	0.720578	0.873923	0	1.07144	0.741583	0	1.38126	1.34552	0
BP	GO:0009939	positive regulation of gibberellic acid mediated signaling pathway	17	0.720578	0.873923	0	0.571482	0.741583	0	0.263255	1.34552	0
BP	GO:2000762	regulation of phenylpropanoid metabolic process	17	0.720578	0.305669	0	0.118961	0	0	0.263255	0	0
BP	GO:0010236	plastoquinone biosynthetic process	17	0.720578	0	0	0	0	0	0	0	0
BP	GO:0009624	response to nematode	275	0.720229	0.245834	0	0.0462911	0	2.05789	0.045721	0	0
BP	GO:0005986	sucrose biosynthetic process	44	0.670968	0.677782	0	0.571482	0.481962	0	0.865199	0.729752	0
BP	GO:0000023	maltose metabolic process	432	0.668483	0	0	0	0	0	0	0	0
MF	GO:0003826	alpha-ketoacid dehydrogenase activity	2	0.660439	1.05056	0	0.82514	0.928754	0	0.960525	1.27102	0
MF	GO:0004147	dihydrolipoamide branched chain acyltransferase activity	2	0.660439	1.05056	0	0.82514	0.928754	0	0.960525	1.27102	0
MF	GO:0004819	glutamine-tRNA ligase activity	2	0.660439	1.05056	0	0.82514	0.928754	0	0.960525	1.27102	0
MF	GO:0004846	urate oxidase activity	2	0.660439	1.05056	0	0.82514	0.928754	0	0.960525	1.27102	0
MF	GO:0042392	sphingosine-1-phosphate phosphatase activity	2	0.660439	1.05056	0	0.82514	0.928754	0	0.960525	1.27102	0
MF	GO:0032441	pheophorbide a oxygenase activity	2	0.660439	0	0	0.82514	0.928754	0	0.960525	0	0
MF	GO:0004365	glyceraldehyde-3-phosphate dehydrogenase (NAD+) (phosphorylating) activity	20	0.660439	0.485251	0	1.10524	0.924774	0	1.45652	0.228171	0
MF	GO:0046408	chlorophyll synthetase activity	5	0.660439	0.291386	0	0.889338	0.322489	0	1.09833	0.53048	0
MF	GO:0004109	coproporphyrinogen oxidase activity	5	0.660439	1.2311	0	0.236058	0.322489	0	0.295419	0.53048	0
MF	GO:0016034	maleylacetoacetate isomerase activity	5	0.660439	0.291386	0	0.236058	0.322489	0	0.295419	0.53048	0
MF	GO:0004485	methylcrotonoyl-CoA carboxylase activity	2	0.660439	0	0	0.82514	0	0	0.960525	0	0
MF	GO:0004604	phosphoadenylyl-sulfate reductase (thioredoxin) activity	2	0.660439	0	0	0.82514	0	0	0.960525	0	0
MF	GO:0004605	phosphatidate cytidylyltransferase activity	25	0.660439	0	0	0.057491	0	0	0.176866	0	0
MF	GO:0080146	L-cysteine desulfhydrase activity	2	0.660439	1.05056	0	0	0	0	0	0	0
MF	GO:0042802	identical protein binding	235	0.660439	0.0188306	0	0	0	0	0.15942	0	0
MF	GO:0008470	isovaleryl-CoA dehydrogenase activity	2	0.660439	0	0	0	0	0	0	0	0
MF	GO:0018822	nitrile hydratase activity	2	0.660439	0	0	0	0	0	0	0	0
MF	GO:0047427	cyanoalanine nitrilase activity	2	0.660439	0	0	0	0	0	0	0	0
MF	GO:0047558	3-cyanoalanine hydratase activity	2	0.660439	0	0	0	0	0	0	0	0
BP	GO:0012501	programmed cell death	59	0.655641	0	0	0	0.106732	0	0	0	0
BP	GO:0010600	regulation of auxin biosynthetic process	12	0.653511	1.31083	0	0	1.18784	0	0	1.84174	0
BP	GO:0009415	response to water	12	0.653511	0.0506336	0	0.410371	0.498132	0	0.545051	0.184833	0
BP	GO:0043266	regulation of potassium ion transport	12	0.653511	0	0	0	0	0	0	0	0
BP	GO:0042549	photosystem II stabilization	24	0.651197	0	0	0	0	0	0	0	0
BP	GO:0043966	histone H3 acetylation	7	0.640903	0	0	0.214787	0	0	0.312975	0	0
BP	GO:0009945	radial axis specification	7	0.640903	0	0	0	0	0	0	0	0
CC	GO:0009522	photosystem I	22	0.640337	0	0	0	0	0	0	0	0
CC	GO:0009538	photosystem I reaction center	35	0.640337	0	0	0	0	0	0	0	0
CC	GO:0012511	monolayer-surrounded lipid storage body	16	0.640337	0	0	0	0	0	0	0	0
BP	GO:0010476	gibberellin mediated signaling pathway	18	0.63609	0.814611	0	0.537933	0.679808	0	0.224438	1.28524	0
BP	GO:0010031	circumnutation	18	0.63609	1.49675	0	0	0.679808	0	0	1.28524	0
BP	GO:0009699	phenylpropanoid biosynthetic process	45	0.631347	0	0	0.550865	0.106732	0	0.843904	0.230145	0
BP	GO:0007568	aging	149	0.627524	0.19946	0	0	0.128415	0	0	0.0886736	0
MF	GO:0008237	metallopeptidase activity	53	0.626862	0	0	0.399099	0	0	0.688165	0	0
MF	GO:0080132	fatty acid alpha-hydroxylase activity	10	0.606642	0.55536	0	0.399099	0.504706	0	0.452192	0.892745	0
MF	GO:0004353	glutamate dehydrogenase [NAD(P)+] activity	10	0.606642	0	0	0	0	0	0	0	0
BP	GO:0015671	oxygen transport	3	0.603355	0.858167	0	0.718834	0.793873	0	0.845294	1.1054	0
BP	GO:0006898	receptor-mediated endocytosis	3	0.603355	0	0	0.718834	0.793873	0	0.845294	0.00456138	0
BP	GO:0010597	green leaf volatile biosynthetic process	3	0.603355	0	0	0	0.793873	0	0.0019106	0	0
BP	GO:0016118	carotenoid catabolic process	3	0.603355	0	0	0.718834	0	0	0.845294	0	0
BP	GO:0016121	carotene catabolic process	3	0.603355	0	0	0.718834	0	0	0.845294	0	0
BP	GO:0016124	xanthophyll catabolic process	3	0.603355	0	0	0.718834	0	0	0.845294	0	0
BP	GO:0060416	response to growth hormone	3	0.603355	0	0	0	0	0	0.0019106	0	0
MF	GO:0015271	outward rectifier potassium channel activity	21	0.593326	0	0	1.63042	0	0	0.323646	0	0
MF	GO:0004866	endopeptidase inhibitor activity	40	0.593326	0	0	0	0	0	0	0	0
MF	GO:0015297	antiporter activity	147	0.590367	0	0	0	0	0	0.137439	0	0
BP	GO:0010205	photoinhibition	32	0.573311	0	0	0	0	0	0	0	0
BP	GO:0046685	response to arsenic-containing substance	126	0.572596	0	0	0.0607039	0.0330049	0	0.224438	0	0
BP	GO:0009958	positive gravitropism	85	0.571673	0	0	0	0	0	0.172731	0	0
BP	GO:0034440	lipid oxidation	19	0.56441	0	0	0	0.128415	0	0	0	0
BP	GO:0046777	protein autophosphorylation	497	0.56441	0	0	0.334348	0	0	0	0	0
BP	GO:0006521	regulation of cellular amino acid metabolic process	13	0.56441	0	0	0	0	0	0	0	0
BP	GO:0015979	photosynthesis	525	0.56441	0	0	0	0	0	0	0	0
MF	GO:0046527	glucosyltransferase activity	16	0.554813	0	0	0.863465	0.650042	0	0.612256	0	0
MF	GO:0000823	inositol-1,4,5-trisphosphate 6-kinase activity	6	0.554813	0	0	0.814127	0	0	0.960525	0	0
MF	GO:0046524	sucrose-phosphate synthase activity	6	0.554813	0	0	0.814127	0	0	0.960525	0	0
MF	GO:0031071	cysteine desulfurase activity	6	0.554813	0	0	0.155026	0	0	0.209838	0	0
MF	GO:0033743	peptide-methionine (R)-S-oxide reductase activity	6	0.554813	0	0	0.155026	0	0	0.209838	0	0
MF	GO:0008887	glycerate kinase activity	6	0.554813	0	0	0	0	0	0	0	0
MF	GO:0015421	oligopeptide-transporting ATPase activity	6	0.554813	0	0	0	0	0	0	0	0
MF	GO:0017153	sodium:dicarboxylate symporter activity	6	0.554813	0	0	0	0	0	0	0	0
MF	GO:0016706	oxidoreductase activity, acting on paired donors, with incorporation or reduction of molecular oxygen, 2-oxoglutarate as one donor, and incorporation of one atom each of oxygen into both donors	125	0.552726	1.20537	0	0.441779	0.780292	0	0.688165	1.18502	0
BP	GO:0019684	photosynthesis, light reaction	518	0.53402	0	0	0	0	0	0	0	0
BP	GO:0016123	xanthophyll biosynthetic process	26	0.527309	0	0	0.152241	0	0	0	0	0
BP	GO:0009944	polarity specification of adaxial/abaxial axis	242	0.52495	3.53431	0	1.0538	2.51015	0	1.29913	3.28456	0
BP	GO:0002238	response to molecule of fungal origin	95	0.52495	0.485693	0	0.845096	1.17084	0	0.494287	0.845378	0
BP	GO:0010508	positive regulation of autophagy	8	0.52495	0	0	0.718834	0.875142	0	0.234364	0	0
BP	GO:0042594	response to starvation	33	0.52495	0	0	0	0.453647	0	0.129187	0	0
BP	GO:0034052	positive regulation of plant-type hypersensitive response	8	0.52495	0.226174	0	0.718834	0.172639	0	0.234364	0.439897	0
BP	GO:0010113	negative regulation of systemic acquired resistance	8	0.52495	0	0	0.718834	0.172639	0	0.234364	0	0
BP	GO:0071490	cellular response to far red light	8	0.52495	0	0	2.66993	0	0	0.902553	0	0
BP	GO:0071491	cellular response to red light	8	0.52495	0	0	2.66993	0	0	0.902553	0	0
BP	GO:0002240	response to molecule of oomycetes origin	8	0.52495	0	0	1.55137	0	0	0.902553	0	0
BP	GO:0000381	regulation of alternative mRNA splicing, via spliceosome	8	0.52495	0	0	0.718834	0	0	0	0	0
BP	GO:0006529	asparagine biosynthetic process	8	0.52495	0	0	0.12782	0	0	0.234364	0	0
BP	GO:0048102	autophagic cell death	8	0.52495	0	0	0	0	0	0	0	0
BP	GO:0051453	regulation of intracellular pH	8	0.52495	0	0	0	0	0	0	0	0
MF	GO:0052634	C-19 gibberellin 2-beta-dioxygenase activity	11	0.512359	0	0	0	0	0	0	0	0
MF	GO:0008266	poly(U) RNA binding	79	0.506063	0	0	0	0	0	0	0	0
MF	GO:0009815	1-aminocyclopropane-1-carboxylate oxidase activity	29	0.498439	1.0865	0	0.23529	0.907957	0	0.426854	1.69557	0
MF	GO:0016762	xyloglucan:xyloglucosyl transferase activity	29	0.498439	0	0	0.584192	0	0	0.874467	0	0
BP	GO:0009816	defense response to bacterium, incompatible interaction	147	0.489319	0	0	0.307663	1.48494	0	0.165179	0	0
CC	GO:0009523	photosystem II	12	0.488282	0	0	0	0	0	0	0	0
CC	GO:0009570	chloroplast stroma	2013	0.488282	0	0	0	0	0	0	0	0
CC	GO:0009706	chloroplast inner membrane	142	0.488282	0	0	0	0	0	0.279529	0	0
CC	GO:0010287	plastoglobule	221	0.488282	0	0	0	0	0	0	0	0
BP	GO:0018401	peptidyl-proline hydroxylation to 4-hydroxy-L-proline	34	0.485744	1.0497	0	0.979826	2.12498	0	1.34943	1.75566	0
BP	GO:0015866	ADP transport	14	0.485744	0	0	0.74966	0	0	0.980291	0	0
BP	GO:0043086	negative regulation of catalytic activity	14	0.485744	0	0	0	0	0	0	0	0
BP	GO:0045487	gibberellin catabolic process	14	0.485744	0	0	0	0	0	0	0	0
BP	GO:0080148	negative regulation of response to water deprivation	14	0.485744	0	0	0	0	0	0	0	0
BP	GO:0010227	floral organ abscission	97	0.472608	0	0	0.110975	0	0	0.450006	0	0
MF	GO:0080046	quercetin 4'-O-glucosyltransferase activity	23	0.471148	0	0	0.488431	0.704743	0	0.235019	0	0
CC	GO:0005811	lipid droplet	3	0.467374	0	0	0.0998517	1.81515	0	0.407997	0	0
CC	GO:0005945	6-phosphofructokinase complex	25	0.467374	1.25569	0	0.0998517	0.51151	0	0.407997	0.962557	0
BP	GO:0006636	unsaturated fatty acid biosynthetic process	229	0.441625	0	0	0.0777974	0	0	0.129187	0	0
BP	GO:0016131	brassinosteroid metabolic process	35	0.429188	0	0	2.67347	0.0330049	0	0.823994	0	0
BP	GO:0051707	response to other organism	257	0.428166	0	0	0.0708444	0.38017	0	0	0	0
BP	GO:0006177	GMP biosynthetic process	4	0.423586	0.677782	0	0.571482	0.602418	0	0.672199	0.89863	0
BP	GO:0009991	response to extracellular stimulus	4	0.423586	0.677782	0	0.571482	0.602418	0	0.672199	0.89863	0
BP	GO:0046916	cellular transition metal ion homeostasis	4	0.423586	0.677782	0	0.571482	0.602418	0	0.672199	0.89863	0
BP	GO:0080021	response to benzoic acid	4	0.423586	0.677782	0	0.571482	0.602418	0	0.672199	0.89863	0
BP	GO:0035434	copper ion transmembrane transport	4	0.423586	0	0	0.571482	0.602418	0	0.672199	0	0
BP	GO:0002215	defense response to nematode	4	0.423586	0.677782	0	0	0.602418	0	0	0.89863	0
BP	GO:0060771	phyllotactic patterning	9	0.423586	0.858167	0	0.618891	0.106732	0	0.172731	0	0
BP	GO:0060774	auxin mediated signaling pathway involved in phyllotactic patterning	9	0.423586	0.858167	0	0.618891	0.106732	0	0.172731	0	0
BP	GO:0051775	response to redox state	9	0.423586	0.163822	0	0.618891	0.106732	0	0.804431	0	0
BP	GO:0009554	megasporogenesis	15	0.423586	0	0	0.683767	0	0	0.902553	0	0
BP	GO:0000719	photoreactive repair	9	0.423586	0	0	0.618891	0	0	0.804431	0	0
BP	GO:0005993	trehalose catabolic process	4	0.423586	0	0	0.571482	0	0	0.672199	0	0
BP	GO:0072660	maintenance of protein location in plasma membrane	4	0.423586	0	0	0.571482	0	0	0.672199	0	0
BP	GO:0080169	cellular response to boron-containing substance deprivation	4	0.423586	0	0	0.571482	0	0	0.672199	0	0
BP	GO:1901183	positive regulation of camalexin biosynthetic process	4	0.423586	0	0	0.571482	0	0	0.672199	0	0
BP	GO:1901332	negative regulation of lateral root development	4	0.423586	0	0	0.571482	0	0	0.672199	0	0
BP	GO:0010148	transpiration	15	0.423586	0	0	0.219053	0	0	0.364223	0	0
BP	GO:0009581	detection of external stimulus	58	0.423586	0	0	0.172188	0	0	0.169402	0	0
BP	GO:0010343	singlet oxygen-mediated programmed cell death	9	0.423586	0	0	0.0708444	0	0	0.172731	0	0
BP	GO:0009808	lignin metabolic process	58	0.423586	0	0	0	0	0	0.169402	0	0
BP	GO:0015914	phospholipid transport	4	0.423586	0	0	0	0	0	0	0	0
BP	GO:0018316	peptide cross-linking via L-cystine	4	0.423586	0	0	0	0	0	0	0	0
BP	GO:0019760	glucosinolate metabolic process	125	0.423586	0	0	0	0	0	0	0	0
BP	GO:0042177	negative regulation of protein catabolic process	4	0.423586	0	0	0	0	0	0	0	0
BP	GO:0043547	positive regulation of GTPase activity	4	0.423586	0	0	0	0	0	0	0	0
BP	GO:0045730	respiratory burst	4	0.423586	0	0	0	0	0	0	0	0
BP	GO:0046459	short-chain fatty acid metabolic process	4	0.423586	0	0	0	0	0	0	0	0
BP	GO:0048831	regulation of shoot system development	67	0.417232	0	0	0	0	0	0	0	0
BP	GO:0042128	nitrate assimilation	36	0.415334	0.128448	0	0.530108	2.61666	0	0.790761	0.00456138	0
BP	GO:0010150	leaf senescence	233	0.405928	0	0	0	0	0	0	0	0
BP	GO:2000031	regulation of salicylic acid mediated signaling pathway	22	0.402469	0.607982	0	0.312789	1.70601	0	0.501619	1.01252	0
BP	GO:0009901	anther dehiscence	29	0.402469	0	0	0	0	0	0	0	0
BP	GO:0009942	longitudinal axis specification	22	0.402469	0	0	0	0	0	0	0	0
MF	GO:0004475	mannose-1-phosphate guanylyltransferase activity	7	0.390493	0.958644	0	0.665672	0.804496	0	0.81081	1.27102	0
MF	GO:0008940	nitrate reductase activity	7	0.390493	0	0	0.665672	0.804496	0	0.81081	0	0
MF	GO:0019904	protein domain specific binding	7	0.390493	0.0840732	0	0.665672	0.125229	0	0.81081	0.299708	0
MF	GO:0032947	protein-containing complex scaffold activity	7	0.390493	0	0	0	0	0	0	0	0
CC	GO:0005740	mitochondrial envelope	56	0.371531	0.726889	0	1.8415	2.61863	0	0.718658	0.933494	0
BP	GO:0043085	positive regulation of catalytic activity	328	0.364734	0	0	0	0	0	0	0	0
BP	GO:0043687	post-translational protein modification	300	0.364734	0	0	0	0	0	0	0	0
MF	GO:0043424	protein histidine kinase binding	68	0.356908	0	0	0.814531	0.650042	0	0.957075	0	0
MF	GO:0005358	high-affinity glucose:proton symporter activity	3	0.356908	0.685105	0	0.557579	0.650042	0	0.623846	0	0
MF	GO:0009679	hexose:proton symporter activity	3	0.356908	0.685105	0	0.557579	0.650042	0	0.623846	0	0
MF	GO:0010327	acetyl CoA:(Z)-3-hexen-1-ol acetyltransferase activity	3	0.356908	0	0	0	0.650042	0	0	0	0
MF	GO:0051777	ent-kaurenoate oxidase activity	3	0.356908	0	0	0	0	0	0	0	0
CC	GO:0031359	integral component of chloroplast outer membrane	34	0.355556	0	0	0.0998517	0	0	0.12472	0	0
BP	GO:2001141	regulation of RNA biosynthetic process	16	0.350534	0	0	0.618891	0	0	0.845294	0.0327241	0
BP	GO:0010380	regulation of chlorophyll biosynthetic process	53	0.345712	0	0	0.921924	0	0	0.585601	0	0
MF	GO:0003872	6-phosphofructokinase activity	25	0.342034	1.32784	0	0.399099	0.650042	0	0.602525	1.27102	0
BP	GO:0009410	response to xenobiotic stimulus	237	0.337808	0	0	0.0334719	0	0.796403	0	0	0.222038
BP	GO:0006537	glutamate biosynthetic process	10	0.332639	0	0	0.571482	0.658851	0	0.695415	0	0
BP	GO:0010501	RNA secondary structure unwinding	10	0.332639	0.752608	0	0.034738	0.658851	0	0.129187	1.1054	0
BP	GO:0007584	response to nutrient	10	0.332639	0	0	0.571482	0.0586702	0	0.695415	0	0
BP	GO:0006665	sphingolipid metabolic process	10	0.332639	0.128448	0	0.034738	0.0586702	0	0.129187	0.301875	0
MF	GO:0003690	double-stranded DNA binding	69	0.327541	0	0	0.0427724	0	0	0.258955	0	0
MF	GO:0051119	sugar transmembrane transporter activity	39	0.327541	0	0	0	0	0	0	0	0
BP	GO:0043067	regulation of programmed cell death	38	0.325731	0	0	0.439395	0	0	0.31522	0	0
MF	GO:0004021	L-alanine:2-oxoglutarate aminotransferase activity	19	0.323028	1.15315	0	0.704914	0.928754	0	0.960525	1.69557	0
MF	GO:0008909	isochorismate synthase activity	13	0.323028	0	0	0.157833	0	0	0.258955	0	0
BP	GO:0009749	response to glucose	313	0.315562	0.622671	0	0	0.463664	0	0.125905	0.504135	0
BP	GO:0042372	phylloquinone biosynthetic process	31	0.29859	0	0	0.0304031	0	0	0.172731	0	0
CC	GO:0005615	extracellular space	28	0.293255	0	0	0	0	0	0	0	0
CC	GO:0009508	plastid chromosome	43	0.291607	0	0	0	0	0	0	0	0
MF	GO:0000248	C-5 sterol desaturase activity	8	0.287796	0.0188306	0	0.557579	0.66461	0	0.673186	0.205422	0
MF	GO:0051536	iron-sulfur cluster binding	8	0.287796	0	0	0.0223815	0.0347444	0	0.0919737	0	0
MF	GO:0004066	asparagine synthase (glutamine-hydrolyzing) activity	8	0.287796	0	0	0.0223815	0	0	0.0919737	0	0
MF	GO:0008840	4-hydroxy-tetrahydrodipicolinate synthase	8	0.287796	0	0	0.0223815	0	0	0.0919737	0	0
MF	GO:0016768	spermine synthase activity	8	0.287796	0	0	0.0223815	0	0	0.0919737	0	0
MF	GO:0030385	ferredoxin:thioredoxin reductase activity	8	0.287796	0	0	0	0	0	0	0	0
MF	GO:0045551	cinnamyl-alcohol dehydrogenase activity	26	0.287796	0	0	0	0	0	0	0	0
BP	GO:0055062	phosphate ion homeostasis	24	0.283664	0	0	0.618891	0	0.796403	0.39634	0	0
BP	GO:0010623	programmed cell death involved in cell development	17	0.283664	0.305669	0	0.571482	0	0	0.788998	0	0
BP	GO:0043484	regulation of RNA splicing	17	0.283664	0	0	0.118961	0	0	0	0	0
BP	GO:0006415	translational termination	24	0.283664	0	0	0	0	0	0	0	0
CC	GO:0019898	extrinsic component of membrane	29	0.277789	0	0	0	0	0	0	0	0
CC	GO:0031361	integral component of thylakoid membrane	4	0.277789	0	0	0	0	0	0	0	0
CC	GO:0043235	receptor complex	4	0.277789	0	0	0	0	0	0	0	0
MF	GO:0003677	DNA binding	3302	0.274977	0.685105	0	0.557579	0.928754	0	0.345165	1.41038	0
MF	GO:0016772	transferase activity, transferring phosphorus-containing groups	20	0.274977	1.07957	0	0.23529	0.430329	0.949353	0.00990259	0.894032	0
MF	GO:0010329	auxin efflux transmembrane transporter activity	20	0.274977	0	0	0	0	0	0.00990259	0	0
MF	GO:0080030	methyl indole-3-acetate esterase activity	20	0.274977	0	0	0	0	0	0.00990259	0	0
MF	GO:0004743	pyruvate kinase activity	41	0.266905	1.54905	0	1.15956	2.64778	0	0.752926	1.69557	0
MF	GO:0015217	ADP transmembrane transporter activity	14	0.266905	0	0	0.561394	0	0	0.757577	0	0
MF	GO:0008886	glyceraldehyde-3-phosphate dehydrogenase (NADP+) (non-phosphorylating) activity	14	0.266905	0	0	0.119584	0	0	0.209838	0	0
MF	GO:0004084	branched-chain-amino-acid transaminase activity	14	0.266905	0	0	0	0	0	0	0	0
MF	GO:0005375	copper ion transmembrane transporter activity	27	0.266301	0	0	0.680325	0.55647	0.765644	0.123764	0	0
BP	GO:0015833	peptide transport	5	0.266225	0	0	0.419404	0	0	0.512734	0	0
BP	GO:0090057	root radial pattern formation	5	0.266225	0	0	0.419404	0	0	0.512734	0	0
BP	GO:0032211	negative regulation of telomere maintenance via telomerase	5	0.266225	0	0	0	0	0	0	0	0
BP	GO:0035264	multicellular organism growth	5	0.266225	0	0	0	0	0	0	0	0
BP	GO:0048219	inter-Golgi cisterna vesicle-mediated transport	5	0.266225	0	0	0	0	0	0	0	0
BP	GO:0060772	leaf phyllotactic patterning	11	0.249948	0.677782	0	1.0538	0.0330049	0	0.093694	0	0
BP	GO:0006559	L-phenylalanine catabolic process	11	0.249948	0.677782	0	0	0.0330049	0	0.093694	0.234129	0
BP	GO:0006572	tyrosine catabolic process	11	0.249948	0.677782	0	0	0.0330049	0	0.093694	0.234129	0
BP	GO:0006644	phospholipid metabolic process	11	0.249948	0	0	0	0.0330049	0	0.093694	0	0
BP	GO:0010080	regulation of floral meristem growth	11	0.249948	0.07399	0	0	0	0	0.093694	0	0
BP	GO:0043489	RNA stabilization	11	0.249948	0	0	0	0	0	0	0	0
BP	GO:0090342	regulation of cell aging	11	0.249948	0	0	0	0	0	0	0	0
BP	GO:0018119	peptidyl-cysteine S-nitrosylation	73	0.241687	0	0	0	0	0	0	0	0
BP	GO:0009643	photosynthetic acclimation	25	0.238445	0	0	0.571482	0	0	0.0144269	0	0
MF	GO:0045300	acyl-[acyl-carrier-protein] desaturase activity	15	0.236714	0.881123	0	0.512849	0.679418	0	0.673968	1.27102	0
MF	GO:0015301	anion:anion antiporter activity	15	0.236714	0	0	0	0.679418	0	0	0	0
MF	GO:0005351	carbohydrate:proton symporter activity	238	0.236714	0	0	0.0947215	0.585335	0	0.137439	0	0
MF	GO:0003938	IMP dehydrogenase activity	4	0.236714	0.485251	0	0.399099	0.457616	0	0.452192	0.664708	0
MF	GO:0046914	transition metal ion binding	4	0.236714	0.485251	0	0.399099	0.457616	0	0.452192	0.664708	0
MF	GO:0051499	D-aminoacyl-tRNA deacylase activity	4	0.236714	0.485251	0	0.399099	0.457616	0	0.452192	0.664708	0
MF	GO:0004015	adenosylmethionine-8-amino-7-oxononanoate transaminase activity	4	0.236714	0	0	0.399099	0	0	0.452192	0	0
MF	GO:0004141	dethiobiotin synthase activity	4	0.236714	0	0	0.399099	0	0	0.452192	0	0
MF	GO:0004555	alpha,alpha-trehalase activity	4	0.236714	0	0	0.399099	0	0	0.452192	0	0
MF	GO:0010301	xanthoxin dehydrogenase activity	4	0.236714	0	0	0.399099	0	0	0.452192	0	0
MF	GO:0015927	trehalase activity	4	0.236714	0	0	0.399099	0	0	0.452192	0	0
MF	GO:0017076	purine nucleotide binding	4	0.236714	0	0	0.399099	0	0	0.452192	0	0
MF	GO:0034485	phosphatidylinositol-3,4,5-trisphosphate 5-phosphatase activity	4	0.236714	0	0	0.399099	0	0	0.452192	0	0
MF	GO:0005459	UDP-galactose transmembrane transporter activity	15	0.236714	0	0	0.0814288	0	0	0.172113	0	0
MF	GO:0003883	CTP synthase activity	15	0.236714	0	0	0	0	0	0	0	0
MF	GO:0004328	formamidase activity	4	0.236714	0	0	0	0	0	0	0	0
MF	GO:0004620	phospholipase activity	15	0.236714	0	0	0	0	0	0	0	0
MF	GO:0004740	pyruvate dehydrogenase (acetyl-transferring) kinase activity	4	0.236714	0	0	0	0	0	0	0	0
MF	GO:0005096	GTPase activator activity	4	0.236714	0	0	0	0	0	0	0	0
MF	GO:0005275	amine transmembrane transporter activity	9	0.236714	0	0	0	0	0	0	0	0
MF	GO:0010276	phytol kinase activity	4	0.236714	0	0	0	0	0	0	0	0
MF	GO:0080139	borate efflux transmembrane transporter activity	9	0.236714	0	0	0	0	0	0	0	0
BP	GO:0009965	leaf morphogenesis	600	0.229529	0	0	0	0	0	0	0	0
BP	GO:0050829	defense response to Gram-negative bacterium	18	0.227929	0	0	0.537933	0	0	0.224438	0	0
CC	GO:0070062	extracellular exosome	16	0.223996	0	0	0	0	0	0	0	0
MF	GO:0016491	oxidoreductase activity	379	0.223155	0	0	0	0	0	0	0	0
BP	GO:0009789	positive regulation of abscisic acid-activated signaling pathway	57	0.220723	0.0506336	0	0	0	0	0	0.0182556	0
MF	GO:0005515	protein binding	5354	0.220365	0	0	0	0	0	0	0	0
BP	GO:0009704	de-etiolation	33	0.218593	0	0	0	0	0	0	0	0
CC	GO:0031201	SNARE complex	10	0.21582	0	0	0	0	0	0	0	0
CC	GO:0043674	columella	10	0.21582	0	0	0	0	0	0	0	0
BP	GO:0031537	regulation of anthocyanin metabolic process	49	0.215108	0	0	0	0	0	0	0	0
MF	GO:0005543	phospholipid binding	29	0.211158	0	0	0	0	0	0.0881044	0	0
BP	GO:2000022	regulation of jasmonic acid mediated signaling pathway	26	0.190369	0.406791	0	0.977233	1.34068	0	0.790761	0.831978	0
BP	GO:0031425	chloroplast RNA processing	26	0.190369	0	0	0.152241	0	0	0	0	0
BP	GO:0010044	response to aluminum ion	26	0.190369	0.406791	0	0	0	0	0	0	0
BP	GO:0019253	reductive pentose-phosphate cycle	26	0.190369	0	0	0	0	0	0	0	0
BP	GO:0010089	xylem development	248	0.185173	1.17611	0	0.463598	0.128415	0	0.39634	1.16428	0
BP	GO:0016045	detection of bacterium	50	0.184106	0.147151	0	0.0896541	0.322531	0	0.327299	0.122828	0
BP	GO:0007093	mitotic cell cycle checkpoint	1	0.184106	0	0	0.236804	0	0	0.277844	0	0
BP	GO:0000769	syncytium formation by mitosis without cytokinesis	1	0.184106	0	0	0	0	0	0	0	0
BP	GO:0006753	nucleoside phosphate metabolic process	12	0.180803	3.47981	0	0.410371	2.15658	0	0.545051	3.03077	0
BP	GO:2000070	regulation of response to water deprivation	12	0.180803	0	0	0.410371	0.498132	0	0.045721	0	0
BP	GO:0071484	cellular response to light intensity	12	0.180803	0.0506336	0	0	0	0	0.045721	0.184833	0
BP	GO:0006109	regulation of carbohydrate metabolic process	19	0.180803	0	0	0	0	0	0	0	0
BP	GO:0006835	dicarboxylic acid transport	12	0.180803	0	0	0	0	0	0	0	0
BP	GO:0007188	adenylate cyclase-modulating G protein-coupled receptor signaling pathway	19	0.180803	0	0	0	0	0	0	0	0
BP	GO:0009638	phototropism	42	0.180803	0	0	0	0	0	0	0	0
BP	GO:2000067	regulation of root morphogenesis	19	0.180803	0	0	0	0	0	0	0	0
BP	GO:0042631	cellular response to water deprivation	240	0.176117	0	0	0	0	0	0	0	0
BP	GO:0006032	chitin catabolic process	6	0.168107	0.393747	0	0	1.18784	0	0	0.620698	0
BP	GO:1900409	positive regulation of cellular response to oxidative stress	6	0.168107	0.393747	0	0.310555	0.350378	0.130785	0.39634	0.620698	0
BP	GO:0051289	protein homotetramerization	6	0.168107	0.393747	0	0.310555	0.350378	0	0.39634	0.620698	0
BP	GO:0006551	leucine metabolic process	6	0.168107	0	0	0.310555	0	0	0.39634	0	0
BP	GO:0051245	negative regulation of cellular defense response	6	0.168107	0	0	0.310555	0	0	0.39634	0	0
BP	GO:0080178	5-carbamoylmethyl uridine residue modification	6	0.168107	0	0	0.310555	0	0	0.39634	0	0
BP	GO:0080005	photosystem stoichiometry adjustment	6	0.168107	0.393747	0	0	0	0	0	0	0
BP	GO:0006435	threonyl-tRNA aminoacylation	6	0.168107	0	0	0	0	0	0	0	0
BP	GO:0010608	posttranscriptional regulation of gene expression	6	0.168107	0	0	0	0	0	0	0	0
BP	GO:0019544	arginine catabolic process to glutamate	6	0.168107	0	0	0	0	0	0	0	0
BP	GO:0008380	RNA splicing	130	0.16668	0.0322471	0	0	0	0	0	0	0
BP	GO:0006569	tryptophan catabolic process	232	0.166421	0.299587	0	0.334348	0	0	0.594161	0.0714282	0
BP	GO:0010325	raffinose family oligosaccharide biosynthetic process	27	0.16579	0.383148	0	0.118961	0.262234	0	0	0.794257	0
CC	GO:0009295	nucleoid	98	0.165145	0	0	0	0	0	0	0	0
CC	GO:0009782	photosystem I antenna complex	5	0.159804	0	0	0	0	0	0	0	0
CC	GO:0031357	integral component of chloroplast inner membrane	5	0.159804	0	0	0	0	0	0	0	0
MF	GO:0003997	acyl-CoA oxidase activity	16	0.159731	0	0	0	0	0	0	0	0
BP	GO:0010183	pollen tube guidance	35	0.159428	0	0	0	0	0	0	0	0
MF	GO:0044212	transcription regulatory region DNA binding	45	0.158624	0	0	0	0	0	0	0	0
MF	GO:0004842	ubiquitin-protein transferase activity	691	0.150524	0	0	0.277074	0	0.0568922	0.0919737	0	0
CC	GO:0001673	male germ cell nucleus	11	0.1499	0	0	0	0	0	0	0	0
MF	GO:0004081	bis(5'-nucleosyl)-tetraphosphatase (asymmetrical) activity	10	0.146628	2.17957	0	0.399099	1.09443	0	0.452192	1.71702	0
MF	GO:0003841	1-acylglycerol-3-phosphate O-acyltransferase activity	10	0.146628	0	0	0	0	0	0	0	0
CC	GO:0033281	TAT protein transport complex	18	0.13706	0	0	0	0	0	0	0	0
BP	GO:0009627	systemic acquired resistance	822	0.133862	0.0232651	0	0.571482	0.874893	0	0.0133965	0.0729081	0
BP	GO:0060359	response to ammonium ion	13	0.129144	0.528801	0	0.33318	0.445085	0	0.479397	0.861714	0
BP	GO:0019676	ammonia assimilation cycle	13	0.129144	0	0	0.33318	0.445085	0	0.479397	0	0
BP	GO:0006168	adenine salvage	13	0.129144	0.528801	0	0	0.445085	0	0	0.861714	0
BP	GO:0010036	response to boron-containing substance	13	0.129144	0	0	0	0.445085	0	0	0	0
BP	GO:0000103	sulfate assimilation	44	0.129144	0	0	1.34397	0	0	0.172731	0	0
BP	GO:0010104	regulation of ethylene-activated signaling pathway	13	0.129144	0	0	0.857724	0	0	0.479397	0	0
BP	GO:0007029	endoplasmic reticulum organization	13	0.129144	0	0	0.33318	0	0	0.0019106	0	0
BP	GO:0010351	lithium ion transport	105	0.129144	0	0	0.182538	0	0	0.312975	0	0
BP	GO:0042819	vitamin B6 biosynthetic process	13	0.129144	0	0	0	0	0	0	0	0
BP	GO:0048497	maintenance of floral organ identity	36	0.126731	0	0	0	0	0	0	0	0
MF	GO:0015228	coenzyme A transmembrane transporter activity	5	0.109203	0	0	0	0.322489	0	0	0	0
MF	GO:0015334	high-affinity oligopeptide transmembrane transporter activity	5	0.109203	0	0	0.236058	0	0	0.295419	0	0
MF	GO:0080044	quercetin 7-O-glucosyltransferase activity	39	0.109203	0	0	0.228083	0	0	0.121908	0	0
MF	GO:0010328	auxin influx transmembrane transporter activity	24	0.109203	0	0	0.0814288	0	0	0.209838	0	0
MF	GO:0000150	recombinase activity	5	0.109203	0	0	0	0	0	0	0	0
MF	GO:0003747	translation release factor activity	24	0.109203	0	0	0	0	0	0	0	0
MF	GO:0004451	isocitrate lyase activity	5	0.109203	0	0	0	0	0	0	0	0
MF	GO:0004721	phosphoprotein phosphatase activity	47	0.109203	0	0	0	0	0	0	0	0
MF	GO:0008047	enzyme activator activity	39	0.109203	0	0	0	0	0	0	0	0
MF	GO:0033744	L-methionine:thioredoxin-disulfide S-oxidoreductase activity	5	0.109203	0	0	0	0	0	0	0	0
MF	GO:0046406	magnesium protoporphyrin IX methyltransferase activity	5	0.109203	0	0	0	0	0	0	0	0
MF	GO:0047807	cytokinin 7-beta-glucosyltransferase activity	5	0.109203	0	0	0	0	0	0	0	0
MF	GO:0080043	quercetin 3-O-glucosyltransferase activity	47	0.109203	0	0	0	0	0	0	0	0
MF	GO:0080045	quercetin 3'-O-glucosyltransferase activity	5	0.109203	0	0	0	0	0	0	0	0
MF	GO:0080062	cytokinin 9-beta-glucosyltransferase activity	5	0.109203	0	0	0	0	0	0	0	0
MF	GO:1990136	linoleate 9S-lipoxygenase activity	5	0.109203	0	0	0	0	0	0	0	0
BP	GO:0009407	toxin catabolic process	687	0.106919	0	0	0	0	0.669828	0	0	0
BP	GO:0010118	stomatal movement	152	0.106919	0	0	0	0	0	0.112261	0	0
BP	GO:0045036	protein targeting to chloroplast	162	0.0946662	0	0	0	0	0	0	0	0
BP	GO:0002213	defense response to insect	116	0.0916037	0.966231	0	0.419404	0.948917	0	0.169402	1.65027	0
BP	GO:0009787	regulation of abscisic acid-activated signaling pathway	21	0.0916037	0	0	0.000760794	0	0	0	0	0
MF	GO:0030551	cyclic nucleotide binding	64	0.0898101	0	0	0.399099	0	0	0	0	0
MF	GO:0008420	RNA polymerase II CTD heptapeptide repeat phosphatase activity	11	0.0873742	0	0	0	0	0	0	0	0
BP	GO:0080149	sucrose induced translational repression	7	0.0870151	2.2509	0	0.857724	2.14029	0	0.312975	2.80493	0
BP	GO:0042752	regulation of circadian rhythm	126	0.0870151	0.785587	0	0	0.709272	0	0	0.337586	0
BP	GO:0060919	auxin influx	7	0.0870151	0.305669	0	0.214787	0.249837	0	0.312975	0.529992	0
BP	GO:0071249	cellular response to nitrate	7	0.0870151	0	0	0.857724	0	0	0.312975	0	0
BP	GO:0045454	cell redox homeostasis	54	0.0870151	0	0	0.280897	0	0	0.234364	0	0
BP	GO:0008643	carbohydrate transport	7	0.0870151	0	0	0.214787	0	0	0.312975	0	0
BP	GO:0010273	detoxification of copper ion	7	0.0870151	0	0	0.214787	0	0	0.312975	0	0
BP	GO:0015783	GDP-fucose transmembrane transport	7	0.0870151	0	0	0.214787	0	0	0.312975	0	0
BP	GO:0000412	histone peptidyl-prolyl isomerization	7	0.0870151	0	0	0	0	0	0	0	0
BP	GO:0010196	nonphotochemical quenching	29	0.0870151	0	0	0	0	0	0	0	0
BP	GO:0019499	cyanide metabolic process	7	0.0870151	0	0	0	0	0	0	0	0
BP	GO:0051365	cellular response to potassium ion starvation	7	0.0870151	0	0	0	0	0	0	0	0
BP	GO:0051410	detoxification of nitrogen compound	7	0.0870151	0	0	0	0	0	0	0	0
BP	GO:1900424	regulation of defense response to bacterium	7	0.0870151	0	0	0	0	0	0	0	0
CC	GO:0009533	chloroplast stromal thylakoid	19	0.0840528	0	0	0	0	0	0	0	0
CC	GO:0009783	photosystem II antenna complex	12	0.0840528	0	0	0	0	0	0	0	0
CC	GO:0031307	integral component of mitochondrial outer membrane	51	0.0823499	0	0	0	0	0	0.279529	0	0
MF	GO:0010427	abscisic acid binding	25	0.0808111	0.824272	0	0	1.05774	0	0	0.645496	0
MF	GO:0009927	histidine phosphotransfer kinase activity	25	0.0808111	0.223101	0	0.399099	0.204059	0.794995	0.176866	0.645496	0
MF	GO:0008441	3'(2'),5'-bisphosphate nucleotidase activity	25	0.0808111	0	0	0.814127	0	0	0.602525	0	0
MF	GO:0019900	kinase binding	25	0.0808111	0	0	0.057491	0	0	0.176866	0	0
BP	GO:0043132	NAD transport	14	0.078422	0	0	0.281005	0	0	0.39785	0	0
BP	GO:0060918	auxin transport	14	0.078422	0	0	0	0	0	0	0	0
BP	GO:0044036	cell wall macromolecule metabolic process	240	0.0777197	1.32246	0	0.571482	0.387528	0	0.493804	1.28524	0
MF	GO:0016987	sigma factor activity	18	0.0763757	0	0	0.351089	0	0	0.452192	0	0
MF	GO:0004857	enzyme inhibitor activity	18	0.0763757	0	0	0	0	0	0	0	0
MF	GO:0010279	indole-3-acetic acid amido synthetase activity	18	0.0763757	0	0	0	0	0	0.0806568	0	0
CC	GO:0000323	lytic vacuole	6	0.0685777	0	0	0	0	0	0	0	0
BP	GO:0006995	cellular response to nitrogen starvation	109	0.0634671	0	0	0	0	0	0	0	0
BP	GO:0010628	positive regulation of gene expression	22	0.0576821	0	0	0	0	0	0.10562	0	0
BP	GO:0052033	pathogen-associated molecular pattern dependent induction by symbiont of host innate immune response	22	0.0576821	0	0	0	0	0	0	0	0
MF	GO:0015144	carbohydrate transmembrane transporter activity	236	0.0568777	0	0	0	0.603373	0	0	0	0
MF	GO:0016791	phosphatase activity	41	0.0568777	2.11742	0	0	0.430329	0	0	1.18502	0
BP	GO:0009639	response to red or far red light	128	0.0553233	0.0531275	0	0	0.195377	0	0	0	0
MF	GO:0008893	guanosine-3',5'-bis(diphosphate) 3'-diphosphatase activity	12	0.0424225	2.75348	0	0.228614	1.65545	0	0.323646	2.45766	0
MF	GO:0008843	endochitinase activity	6	0.0424225	0.198796	0	0	0.928754	0	0	0.421928	0
MF	GO:0035885	exochitinase activity	6	0.0424225	0.198796	0	0	0.928754	0	0	0.421928	0
MF	GO:0019172	glyoxalase III activity	12	0.0424225	0	0	0	0.346617	0	0	0	0
MF	GO:0004340	glucokinase activity	6	0.0424225	0.198796	0	0.155026	0.21832	0	0.209838	0.421928	0
MF	GO:0008865	fructokinase activity	6	0.0424225	0.198796	0	0.155026	0.21832	0	0.209838	0.421928	0
MF	GO:0000035	acyl binding	6	0.0424225	0	0	0.155026	0.21832	0	0.209838	0	0
MF	GO:0016417	S-acyltransferase activity	6	0.0424225	0	0	0.155026	0.21832	0	0.209838	0	0
MF	GO:0015398	high-affinity secondary active ammonium transmembrane transporter activity	6	0.0424225	0	0	0	0.21832	0	0	0	0
MF	GO:0019901	protein kinase binding	50	0.0424225	0	0	0.196134	0	0	0	0	0
MF	GO:0008898	S-adenosylmethionine-homocysteine S-methyltransferase activity	6	0.0424225	0.198796	0	0.155026	0	0	0.209838	0	0
MF	GO:0003985	acetyl-CoA C-acetyltransferase activity	6	0.0424225	0	0	0.155026	0	0	0.209838	0	0
MF	GO:0003914	DNA (6-4) photolyase activity	1	0.0424225	0	0	0.0947215	0	0	0.121908	0	0
MF	GO:0016532	superoxide dismutase copper chaperone activity	6	0.0424225	0	0	0	0	1.74365	0	0	0
MF	GO:0001664	G protein-coupled receptor binding	19	0.0424225	0	0	0	0	0	0	0	0
MF	GO:0004416	hydroxyacylglutathione hydrolase activity	19	0.0424225	0	0	0	0	0	0	0	0
MF	GO:0004766	spermidine synthase activity	12	0.0424225	0	0	0	0	0	0	0	0
MF	GO:0004829	threonine-tRNA ligase activity	6	0.0424225	0	0	0	0	0	0	0	0
MF	GO:0008476	protein-tyrosine sulfotransferase activity	6	0.0424225	0	0	0	0	0	0	0	0
MF	GO:0008800	beta-lactamase activity	6	0.0424225	0	0	0	0	0	0	0	0
MF	GO:0016166	phytoene dehydrogenase activity	6	0.0424225	0	0	0	0	0	0	0	0
MF	GO:0016621	cinnamoyl-CoA reductase activity	26	0.0424225	0	0	0	0	0	0	0	0
MF	GO:0031683	G-protein beta/gamma-subunit complex binding	19	0.0424225	0	0	0	0	0	0	0	0
MF	GO:0034256	chlorophyll(ide) b reductase activity	6	0.0424225	0	0	0	0	0	0	0	0
BP	GO:0009788	negative regulation of abscisic acid-activated signaling pathway	101	0.0410043	0.131528	0	0	0	0	0	0.37342	0
BP	GO:0002237	response to molecule of bacterial origin	272	0.0401634	2.31302	0	0.0630596	2.43749	0	0.0638373	1.45918	0
BP	GO:0006814	sodium ion transport	74	0.0368922	0	0	0	0	0	0	0	0
MF	GO:0046983	protein dimerization activity	27	0.034822	0	0	0.321787	0	0	0	0	0
CC	GO:0005779	integral component of peroxisomal membrane	13	0.0271709	0	0	0	0	0	0	0	0
BP	GO:0080036	regulation of cytokinin-activated signaling pathway	15	0.0228467	0.39451	0.255671	0.683767	0.322531	1.12998	0.364223	0.725084	0.00276226
BP	GO:0033014	tetrapyrrole biosynthetic process	15	0.0228467	0.39451	0	0	0	0	0	0.0714282	0
BP	GO:2000037	regulation of stomatal complex patterning	15	0.0228467	0	0	0	0	0	0	0	0
BP	GO:1900151	regulation of nuclear-transcribed mRNA catabolic process, deadenylation-dependent decay	8	0.0118366	0	0	0	0.172639	0	0	0	0
BP	GO:0010583	response to cyclopentenone	462	0.0118366	0	0	0.54344	0	0.130785	0.045721	0	0
BP	GO:0015680	protein maturation by copper ion transfer	8	0.0118366	0	0	0.12782	0	1.52419	0	0	0
BP	GO:0044419	interspecies interaction between organisms	8	0.0118366	0	0	0.12782	0	0	0.234364	0	0
BP	GO:0048255	mRNA stabilization	8	0.0118366	0	0	0.12782	0	0	0.234364	0	0
BP	GO:0046740	transport of virus in host, cell to cell	8	0.0118366	0.226174	0	0	0	0	0	0	0
BP	GO:0015755	fructose transmembrane transport	8	0.0118366	0	0	0	0	0	0	0	0
BP	GO:0016553	base conversion or substitution editing	8	0.0118366	0	0	0	0	0	0	0	0
BP	GO:0019477	L-lysine catabolic process	8	0.0118366	0	0	0	0	0	0	0	0
BP	GO:0090056	regulation of chlorophyll metabolic process	2	0.0091851	0.0596455	0	0	1.17084	0	0	0.115325	0
BP	GO:0032981	mitochondrial respiratory chain complex I assembly	2	0.0091851	0.0596455	0	0.0462911	0.0330049	0	0.112261	0	0
BP	GO:0042371	vitamin K biosynthetic process	2	0.0091851	0.0596455	0	0.0462911	0.0330049	0	0.112261	0.115325	0
BP	GO:0006721	terpenoid metabolic process	2	0.0091851	0.0596455	0	0.0462911	0	0	0.112261	0	0
BP	GO:0046443	FAD metabolic process	2	0.0091851	0.0596455	0	0.0462911	0	0	0.112261	0	0
BP	GO:0010647	positive regulation of cell communication	2	0.0091851	0	0	0.0462911	0	0	0.112261	0	0
BP	GO:0018023	peptidyl-lysine trimethylation	2	0.0091851	0	0	0.0462911	0	0	0.112261	0	0
BP	GO:0045176	apical protein localization	2	0.0091851	0	0	0.0462911	0	0	0.112261	0	0
BP	GO:1900490	positive regulation of hydroxymethylglutaryl-CoA reductase (NADPH) activity	2	0.0091851	0	0	0.0462911	0	0	0.112261	0	0
BP	GO:0000212	meiotic spindle organization	2	0.0091851	0	0	0	0	0	0	0	0
BP	GO:0003156	regulation of animal organ formation	2	0.0091851	0	0	0	0	0	0	0	0
BP	GO:0006376	mRNA splice site selection	2	0.0091851	0	0	0	0	0	0	0	0
BP	GO:0006527	arginine catabolic process	2	0.0091851	0	0	0	0	0	0	0	0
BP	GO:0006595	polyamine metabolic process	2	0.0091851	0	0	0	0	0	0	0	0
BP	GO:0009062	fatty acid catabolic process	160	0.0091851	0	0	0	0	0	0	0	0
BP	GO:0016236	macroautophagy	2	0.0091851	0	0	0	0	0	0	0	0
BP	GO:0016560	protein import into peroxisome matrix, docking	2	0.0091851	0	0	0	0	0	0	0	0
BP	GO:0030397	membrane disassembly	2	0.0091851	0	0	0	0	0	0	0	0
BP	GO:0046680	response to DDT	2	0.0091851	0	0	0	0	0	0	0	0
BP	GO:0048024	regulation of mRNA splicing, via spliceosome	2	0.0091851	0	0	0	0	0	0	0	0
BP	GO:0048236	plant-type sporogenesis	2	0.0091851	0	0	0	0	0	0	0	0
BP	GO:0060148	positive regulation of posttranscriptional gene silencing	2	0.0091851	0	0	0	0	0	0	0	0
BP	GO:0006952	defense response	855	0	0.924248	0	1.11517	4.66723	0	0.167577	1.67245	0
MF	GO:0016301	kinase activity	2433	0	0.898945	0	0.82514	2.6536	0	0.0836975	0.794558	0
CC	GO:0005886	plasma membrane	9535	0	0.0389742	0	0.0998517	2.61863	0	0.279529	0.279106	0
BP	GO:0015695	organic cation transport	16	0	0	0	0	2.45823	0	0	0	0
BP	GO:0009877	nodulation	7	0	2.2509	0	0	2.14029	0	0	1.46288	0
MF	GO:0008519	ammonium transmembrane transporter activity	16	0	0	0	0	1.84961	0	0	0	0
MF	GO:0015114	phosphate ion transmembrane transporter activity	41	0	0	0	0	1.68795	0	0	0	0
MF	GO:0046715	active borate transmembrane transporter activity	19	0	0	0	0	1.56614	0	0	0	0
BP	GO:0051170	import into nucleus	17	0	0	0	0.571482	1.43666	0	0.263255	0.00456138	0
BP	GO:0009992	cellular water homeostasis	6	0	0	0	0	1.18784	0	0	0	0
BP	GO:0080181	lateral root branching	6	0	0	0	0	1.18784	0	0	0	0
BP	GO:0006094	gluconeogenesis	706	0	0.706107	0	0	1.17084	0	0	1.36057	0
BP	GO:0009817	defense response to fungus, incompatible interaction	122	0	0	0	0	1.14053	0	0	0.104418	0
BP	GO:0071369	cellular response to ethylene stimulus	74	0	0.622671	0	0.0812691	1.07561	0	0.129187	1.34552	0
BP	GO:0010167	response to nitrate	637	0	0	0	0.419404	1.026	0	0.516817	0	0
BP	GO:0010498	proteasomal protein catabolic process	335	0	0.752608	0	0.498542	0.952992	0	0.802759	1.27297	0
BP	GO:0006096	glycolytic process	882	0	0.513003	0	0	0.948917	0	0	0.614823	0
MF	GO:0010331	gibberellin binding	2	0	1.05056	0	0.82514	0.928754	0	0	1.27102	0
MF	GO:0051749	indole acetic acid carboxyl methyltransferase activity	2	0	1.05056	0	0	0.928754	0	0	1.27102	0
MF	GO:0032442	phenylcoumaran benzylic ether reductase activity	2	0	0	0	0	0.928754	0	0	0	0
BP	GO:0006085	acetyl-CoA biosynthetic process	33	0	0.195545	0	0.607325	0.919106	0	0.129187	0.574113	0
BP	GO:0040008	regulation of growth	18	0	0	0	0.0769788	0.679808	0	0	0	0
BP	GO:0043068	positive regulation of programmed cell death	18	0	0	0	0.0769788	0.679808	0	0	0	0
BP	GO:0006972	hyperosmotic response	422	0	0.477732	0	0	0.679808	0	0	0.115325	0
BP	GO:1902347	response to strigolactone	18	0	0	0	0	0.679808	0	0	0	0
BP	GO:0006424	glutamyl-tRNA aminoacylation	10	0	0.128448	0	0.571482	0.658851	0	0.129187	0.301875	0
MF	GO:0005509	calcium ion binding	416	0	0	0	0.236058	0.650042	0	0.121908	0.645496	0
MF	GO:0004359	glutaminase activity	3	0	0	0	0	0.650042	0	0	0	0
MF	GO:0004729	oxygen-dependent protoporphyrinogen oxidase activity	3	0	0	0	0	0.650042	0	0	0	0
BP	GO:0000041	transition metal ion transport	364	0	0	0	0	0.602418	0	0	0	0
BP	GO:2000122	negative regulation of stomatal complex development	4	0	0	0	0	0.602418	0	0	0	0
MF	GO:0004818	glutamate-tRNA ligase activity	9	0	0	0	0	0.601845	0	0.0395066	0.13266	0
MF	GO:0004497	monooxygenase activity	83	0	0	0	0.0223272	0.601576	0	0	0.0456746	0
BP	GO:0051865	protein autoubiquitination	41	0	0	0	0	0.586839	0	0	0	0
MF	GO:0030246	carbohydrate binding	209	0	0	0	0	0.578395	0	0.0059297	0	0
BP	GO:0006817	phosphate ion transport	79	0	0	0	0	0.568696	0	0	0	0
BP	GO:0006352	DNA-templated transcription, initiation	54	0	0.0770558	0	0.0334719	0.551826	0	0.0019106	0	0
CC	GO:0031226	intrinsic component of plasma membrane	3	0	0	0	0	0.51151	0	0	0	0
BP	GO:0010154	fruit development	95	0	0	0	0	0.504362	0	0.240369	0	0
BP	GO:0009759	indole glucosinolate biosynthetic process	32	0	0	0	0.310555	0.498132	0	0	0.0886736	0
CC	GO:0005576	extracellular region	4252	0	0	0	0	0.472098	0	0	0	0
MF	GO:0004069	L-aspartate:2-oxoglutarate aminotransferase activity	19	0	0	0	0.704914	0.457616	0	0.0395066	0	0
MF	GO:0008841	dihydrofolate synthase activity	4	0	0	0	0	0.457616	0	0	0	0
BP	GO:0006833	water transport	551	0	0.0596455	0	0	0.447967	1.52447	0	0	0
BP	GO:0018315	molybdenum incorporation into molybdenum-molybdopterin complex	5	0	0	0	0	0.447967	0	0	0	0
MF	GO:0004568	chitinase activity	52	0	0	0	0	0.446056	0	0	0	0
BP	GO:0009855	determination of bilateral symmetry	383	0	1.01514	0	0	0.445085	0	0.203036	0.794257	0
BP	GO:0000380	alternative mRNA splicing, via spliceosome	13	0	0.528801	0	0	0.445085	0	0	0.861714	0
MF	GO:0016847	1-aminocyclopropane-1-carboxylate synthase activity	11	0	0	0	0	0.432415	0	0	0	0
BP	GO:0071732	cellular response to nitric oxide	72	0	0.321654	0	0	0.430545	0	0	0.910802	0
BP	GO:0052544	defense response by callose deposition in cell wall	59	0	0	0	0	0.425137	0	0	0	0
BP	GO:0048575	short-day photoperiodism, flowering	14	0	0	0	0.74966	0.38017	0	0	0	0
BP	GO:0048579	negative regulation of long-day photoperiodism, flowering	14	0	1.09953	0	0	0.38017	0	0	0.104418	0
BP	GO:0007010	cytoskeleton organization	408	0	0.285871	0	0.178282	0.370708	0	0.390596	0.595882	0
BP	GO:0009943	adaxial/abaxial axis specification	25	0	0.0565468	0	1.03866	0.349335	0	0.373118	0	0
BP	GO:0080163	regulation of protein serine/threonine phosphatase activity	15	0	0	0	0	0.322531	0	0	0.0714282	0
MF	GO:0045544	gibberellin 20-oxidase activity	5	0	0	0	0.236058	0.322489	0	0	0	0
MF	GO:0005315	inorganic phosphate transmembrane transporter activity	44	0	0	0	0	0.322489	0	0	0	0
MF	GO:0045430	chalcone isomerase activity	5	0	0	0	0	0.322489	0	0	0	0
BP	GO:0008610	lipid biosynthetic process	26	0	0.406791	0	0.152241	0.303264	0	0.329755	0.831978	0
MF	GO:0008143	poly(A) binding	23	0	0.958644	0	0	0.268026	0	0	0.114185	0
BP	GO:0009266	response to temperature stimulus	437	0	0.358865	0	0	0.26526	0	0.0961884	0	0
BP	GO:0046713	borate transport	27	0	0	0	0	0.262234	0	0	0	0
MF	GO:0004601	peroxidase activity	203	0	0	0	0	0.24998	0	0	0	0
BP	GO:0010192	mucilage biosynthetic process	7	0	0.305669	0	0	0.249837	0	0	0	0
BP	GO:0040019	positive regulation of embryonic development	7	0	0	0	0	0.249837	0	0	0	0
MF	GO:0015370	solute:sodium symporter activity	6	0	1.05056	0	0	0.21832	0	0	0.421928	0
MF	GO:0051980	iron-nicotianamine transmembrane transporter activity	6	0	0.198796	0	0	0.21832	0	0	0.421928	0
MF	GO:0016041	glutamate synthase (ferredoxin) activity	6	0	0	0	0	0.21832	0	0	0	0
MF	GO:0050521	alpha-glucan, water dikinase activity	6	0	0	0	0	0.21832	0	0	0	0
BP	GO:0017148	negative regulation of translation	29	0	0.306635	0	0	0.189222	0	0	0.702216	0
BP	GO:0071281	cellular response to iron ion	98	0	0.16629	0	0	0.189222	0	0	0.794257	0
BP	GO:0009649	entrainment of circadian clock	18	0	0.254802	0	0	0.172639	0	0	0	0
BP	GO:0009311	oligosaccharide metabolic process	18	0	0	0	0	0.172639	0	0	0	0
BP	GO:0015706	nitrate transport	645	0	0	0	0	0.172639	0	0	0	0
BP	GO:0009682	induced systemic resistance	43	0	0	0	0	0.155573	0	0	0	0
BP	GO:0009814	defense response, incompatible interaction	348	0	0	0	0.350121	0.153792	0	0	0	0
MF	GO:0004356	glutamate-ammonia ligase activity	26	0	0	0	0	0.152966	0	0	0	0
BP	GO:0010358	leaf shaping	31	0	0.245834	0	0.33318	0.128415	0	0.172731	0	0
BP	GO:0016114	terpenoid biosynthetic process	31	0	0	0	0	0.128415	0	0	0	0
MF	GO:0016767	geranylgeranyl-diphosphate geranylgeranyltransferase activity	7	0	0	0	0.665672	0.125229	0	0.137439	0	0
MF	GO:0046905	phytoene synthase activity	7	0	0	0	0.665672	0.125229	0	0.137439	0	0
MF	GO:0005344	oxygen carrier activity	7	0	0.0840732	0	0.0814288	0.125229	0	0.137439	0.299708	0
MF	GO:0004634	phosphopyruvate hydratase activity	16	0	0	0	0.0381488	0.125229	0	0	0	0
MF	GO:0047334	diphosphate-fructose-6-phosphate 1-phosphotransferase activity	16	0	0	0	0.0381488	0.125229	0	0	0	0
BP	GO:0010452	histone H3-K36 methylation	9	0	0	0	0.0708444	0.106732	0	0.172731	0	0
BP	GO:0009715	chalcone biosynthetic process	9	0	0	0	0	0.106732	0	0	0	0
BP	GO:0010014	meristem initiation	390	0	0.941843	0	0	0.106224	0	0.169402	0.725084	0
BP	GO:0010193	response to ozone	120	0	0	0	0	0.105407	0	0	0	0
BP	GO:0009851	auxin biosynthetic process	46	0	0.226174	0	0	0.0881759	0	0	0.669537	0
BP	GO:0006813	potassium ion transport	90	0	0	0	0.0427129	0.0875886	0	0	0	0
BP	GO:0051258	protein polymerization	33	0	0	0	0	0.0752107	0	0	0	0
BP	GO:0019853	L-ascorbic acid biosynthetic process	47	0	0	0	0	0.062184	0	0.117702	0.184833	0
BP	GO:0008219	cell death	206	0	0	0	0.189204	0.0586702	0	0.0634734	0	0
BP	GO:0032940	secretion by cell	10	0	0.128448	0	0.034738	0.0586702	0	0.129187	0.301875	0
BP	GO:0009727	detection of ethylene stimulus	10	0	0	0	0	0.0586702	0	0	0	0
BP	GO:0010353	response to trehalose	10	0	0	0	0	0.0586702	0	0	0	0
BP	GO:0060211	regulation of nuclear-transcribed mRNA poly(A) tail shortening	10	0	0	0	0	0.0586702	0	0	0	0
BP	GO:0045088	regulation of innate immune response	158	0	0	0	1.12632	0.0384019	0	0.390596	0	0
MF	GO:0043295	glutathione binding	29	0	0	0	0	0.0365938	0	0	0	0
MF	GO:0004351	glutamate decarboxylase activity	8	0	0	0	0.557579	0.0347444	0	0.0919737	0	0
MF	GO:0004473	malate dehydrogenase (decarboxylating) (NADP+) activity	8	0	0.0188306	0	0.0223815	0.0347444	0	0.0919737	0.205422	0
MF	GO:0031957	very long-chain fatty acid-CoA ligase activity	8	0	0	0	0	0.0347444	0	0	0	0
BP	GO:0031063	regulation of histone deacetylation	2	0	0	0	0.0462911	0.0330049	0	0	0	0
BP	GO:0048444	floral organ morphogenesis	35	0	0.147151	0	0	0.0330049	0	0	0.506851	0
BP	GO:0006104	succinyl-CoA metabolic process	2	0	0.0596455	0	0	0.0330049	0	0	0.115325	0
BP	GO:0033354	chlorophyll cycle	2	0	0.0596455	0	0	0.0330049	0	0	0.115325	0
BP	GO:2000029	regulation of proanthocyanidin biosynthetic process	2	0	0.0596455	0	0	0.0330049	0	0	0	0
BP	GO:0008615	pyridoxine biosynthetic process	11	0	0	0	0	0.0330049	0	0	0	0
BP	GO:0009745	sucrose mediated signaling	2	0	0	0	0	0.0330049	0	0	0	0
BP	GO:0030327	prenylated protein catabolic process	2	0	0	0	0	0.0330049	0	0	0	0
BP	GO:0045338	farnesyl diphosphate metabolic process	2	0	0	0	0	0.0330049	0	0	0	0
BP	GO:0048571	long-day photoperiodism	2	0	0	0	0	0.0330049	0	0	0	0
BP	GO:1900088	regulation of inositol biosynthetic process	2	0	0	0	0	0.0330049	0	0	0	0
BP	GO:1900091	regulation of raffinose biosynthetic process	2	0	0	0	0	0.0330049	0	0	0	0
MF	GO:0010290	chlorophyll catabolite transmembrane transporter activity	10	0	0	0	1.64531	0	0	0	0	0
MF	GO:0015431	glutathione S-conjugate-exporting ATPase activity	10	0	0	0	1.64531	0	0	0	0	0
BP	GO:0017186	peptidyl-pyroglutamic acid biosynthetic process, using glutaminyl-peptide cyclotransferase	2	0	0.0596455	0	1.0538	0	0	0	0	0
MF	GO:0004438	phosphatidylinositol-3-phosphatase activity	2	0	0	0	0.82514	0	0	0	0	0
MF	GO:0016603	glutaminyl-peptide cyclotransferase activity	2	0	0	0	0.82514	0	0	0	0	0
MF	GO:0052629	phosphatidylinositol-3,5-bisphosphate 3-phosphatase activity	2	0	0	0	0.82514	0	0	0	0	0
MF	GO:0050284	sinapate 1-glucosyltransferase activity	7	0	0	0	0.665672	0	0	0.137439	0	0
BP	GO:1900425	negative regulation of defense response to bacterium	9	0	0	0	0.618891	0	0	0	0	0
BP	GO:0043407	negative regulation of MAP kinase activity	42	0	0.32184	0	0.617856	0	0	0	0	0
BP	GO:0007112	male meiosis cytokinesis	4	0	0	0	0.571482	0	0	0	0	0
BP	GO:0009801	cinnamic acid ester metabolic process	4	0	0	0	0.571482	0	0	0	0	0
BP	GO:0009868	jasmonic acid and ethylene-dependent systemic resistance, jasmonic acid mediated signaling pathway	4	0	0	0	0.571482	0	0	0	0	0
BP	GO:0009955	adaxial/abaxial pattern specification	25	0	0	0	0.571482	0	0	0.373118	0	0
BP	GO:0010618	aerenchyma formation	17	0	0	0	0.571482	0	0	0.263255	0	0
BP	GO:0043903	regulation of symbiosis, encompassing mutualism through parasitism	4	0	0	0	0.571482	0	0	0	0	0
BP	GO:0080147	root hair cell development	54	0	0	0	0.571482	0	0	0.234364	0	0
BP	GO:0080160	selenate transport	4	0	0	0	0.571482	0	0	0	0	0
MF	GO:0004609	phosphatidylserine decarboxylase activity	8	0	0.0188306	0	0.557579	0	0	0	0	0
MF	GO:0009916	alternative oxidase activity	8	0	0	0	0.557579	0	0	0	0	0
MF	GO:0016407	acetyltransferase activity	9	0	0	0	0.431594	0	0	0.0395066	0.13266	0
BP	GO:0016119	carotene metabolic process	5	0	0	0	0.419404	0	0	0	0	0
MF	GO:0005216	ion channel activity	52	0	0	0	0.399099	0	0	0	0	0
MF	GO:0052731	phosphocholine phosphatase activity	4	0	0	0	0.399099	0	0	0	0	0
MF	GO:0052732	phosphoethanolamine phosphatase activity	4	0	0	0	0.399099	0	0	0	0	0
MF	GO:0080150	S-adenosyl-L-methionine:benzoic acid carboxyl methyl transferase activity	4	0	0	0	0.399099	0	0	0	0	0
BP	GO:0048608	reproductive structure development	52	0	0	0	0.321812	0	0	0.0297666	0	0
BP	GO:0042351	'de novo' GDP-L-fucose biosynthetic process	6	0	0	0	0.310555	0	0	0	0	0
BP	GO:0042539	hypotonic salinity response	6	0	0	0	0.310555	0	0	0	0	0
BP	GO:0046345	abscisic acid catabolic process	6	0	0	0	0.310555	0	0	0	0	0
BP	GO:0009718	anthocyanin-containing compound biosynthetic process	136	0	0	0	0.284104	0	0	0	0	0
BP	GO:0006790	sulfur compound metabolic process	54	0	0	0	0.280897	0	0	0.0019106	0	0
BP	GO:0006517	protein deglycosylation	1	0	0	0	0.236804	0	0	0	0	0
BP	GO:1900030	regulation of pectin biosynthetic process	1	0	0	0	0.236804	0	0	0	0	0
MF	GO:0090411	brassinosteroid binding	5	0	0	0	0.236058	0	0	0	0	0
MF	GO:1990135	flavonoid sulfotransferase activity	12	0	0	0	0.228614	0	0	0	0	0
BP	GO:0010100	negative regulation of photomorphogenesis	45	0	0	0	0.219053	0	0	0.158873	0	0
BP	GO:0051262	protein tetramerization	7	0	0	0	0.214787	0	0	0	0	0
MF	GO:0004439	phosphatidylinositol-4,5-bisphosphate 5-phosphatase activity	40	0	0	0	0.188486	0	0	0	0	0
MF	GO:0005347	ATP transmembrane transporter activity	21	0	0	0	0.187627	0	0	0.323646	0	0
MF	GO:0080118	brassinosteroid sulfotransferase activity	13	0	0	0	0.157833	0	0	0	0	0
MF	GO:0008936	nicotinamidase activity	6	0	0	0	0.155026	0	0	0	0	0
MF	GO:0052624	2-phytyl-1,4-naphthoquinone methyltransferase activity	6	0	0	0	0.155026	0	0	0	0	0
BP	GO:0010075	regulation of meristem growth	538	0	1.83147	0	0.129653	0	0	0.518167	0.620698	0
BP	GO:0045116	protein neddylation	8	0	0	0	0.12782	0	0	0	0	0
MF	GO:0009001	serine O-acetyltransferase activity	14	0	0	0	0.119584	0	0	0	0	0
MF	GO:0008810	cellulase activity	23	0	0	0	0.118307	0	0	0	0	0
MF	GO:0008080	N-acetyltransferase activity	65	0	0	0	0.112239	0	0	0	0	0
BP	GO:0055114	oxidation-reduction process	122	0	0	0	0.110975	0	0	0	0	0
BP	GO:0019745	pentacyclic triterpenoid biosynthetic process	110	0	0	0	0.100607	0	0	0.234364	0	0
CC	GO:0010369	chromocenter	17	0	0	0	0.0998517	0	0	0	0	0
MF	GO:0004674	protein serine/threonine kinase activity	737	0	0	0	0.0947215	0	0	0.0395066	0	0
MF	GO:0033925	mannosyl-glycoprotein endo-beta-N-acetylglucosaminidase activity	1	0	0	0	0.0947215	0	0	0	0	0
MF	GO:0000170	sphingosine hydroxylase activity	7	0	0	0	0.0814288	0	0	0.137439	0	0
MF	GO:0005457	GDP-fucose transmembrane transporter activity	7	0	0	0	0.0814288	0	0	0.137439	0	0
MF	GO:0010295	(+)-abscisic acid 8'-hydroxylase activity	15	0	0	0	0.0814288	0	0	0	0	0
MF	GO:0015168	glycerol transmembrane transporter activity	7	0	0	0	0.0814288	0	0	0	0	0
MF	GO:0016629	12-oxophytodienoate reductase activity	7	0	0	0	0.0814288	0	0	0	0	0
MF	GO:0034722	gamma-glutamyl-peptidase activity	7	0	0	0	0.0814288	0	0	0.137439	0	0
BP	GO:0006400	tRNA modification	18	0	0	0	0.0769788	0	0	0.224438	0	0
BP	GO:0009625	response to insect	164	0	0	2.06159	0.0708444	0	1.17679	0	0	0
BP	GO:0009102	biotin biosynthetic process	9	0	0	0	0.0708444	0	0	0.172731	0	0
BP	GO:0010115	regulation of abscisic acid biosynthetic process	9	0	0	0	0.0708444	0	0	0.172731	0	0
BP	GO:0015786	UDP-glucose transmembrane transport	9	0	0	0	0.0708444	0	0	0.172731	0	0
BP	GO:0019419	sulfate reduction	9	0	0	0	0.0708444	0	0	0	0	0
BP	GO:0030029	actin filament-based process	9	0	0	0	0.0708444	0	0	0.172731	0	0
CC	GO:0009505	plant-type cell wall	759	0	0	0	0.0699911	0	0	0.537895	0	0
MF	GO:0016779	nucleotidyltransferase activity	46	0	0	0	0.0552186	0	0	0	0	0
BP	GO:0000070	mitotic sister chromatid segregation	2	0	0	0	0.0462911	0	0	0	0	0
BP	GO:0034089	establishment of meiotic sister chromatid cohesion	2	0	0	0	0.0462911	0	0	0	0	0
BP	GO:0070482	response to oxygen levels	2	0	0	0	0.0462911	0	0	0	0	0
BP	GO:0006566	threonine metabolic process	10	0	0.128448	0	0.034738	0	0	0	0	0
BP	GO:0009097	isoleucine biosynthetic process	10	0	0.128448	0	0.034738	0	0	0	0	0
BP	GO:0009691	cytokinin biosynthetic process	91	0	0.0565468	0	0.034738	0	0	0	0	0
BP	GO:0006741	NADP biosynthetic process	10	0	0	0	0.034738	0	0	0.129187	0	0
BP	GO:0010109	regulation of photosynthesis	10	0	0	0	0.034738	0	0	0.129187	0	0
BP	GO:0010321	regulation of vegetative phase change	10	0	0	0	0.034738	0	0	0	0	0
BP	GO:0006891	intra-Golgi vesicle-mediated transport	210	0	0	0	0.032423	0	0	0.0292582	0	0
BP	GO:0048527	lateral root development	251	0	0	0	0.0322153	0	0	0	0	0
MF	GO:0015116	sulfate transmembrane transporter activity	47	0	0	0	0.0302458	0	0	0	0	0
BP	GO:0006733	oxidoreduction coenzyme metabolic process	131	0	0.19946	0	0.026244	0	0	0.169402	0.609352	0
BP	GO:0006766	vitamin metabolic process	131	0	0.19946	0	0.026244	0	0	0.169402	0.609352	0
BP	GO:0009106	lipoate metabolic process	131	0	0.19946	0	0.026244	0	0	0.169402	0.609352	0
BP	GO:0009108	coenzyme biosynthetic process	131	0	0.19946	0	0.026244	0	0	0.169402	0.609352	0
BP	GO:0044272	sulfur compound biosynthetic process	131	0	0.19946	0	0.026244	0	0	0.169402	0.609352	0
MF	GO:0004364	glutathione transferase activity	132	0	0	0	0.0223815	0	0.608005	0	0	0
MF	GO:0003935	GTP cyclohydrolase II activity	8	0	0	0	0.0223815	0	0	0.0919737	0	0
MF	GO:0004383	guanylate cyclase activity	8	0	0	0	0.0223815	0	0	0.0919737	0	0
MF	GO:0008686	3,4-dihydroxy-2-butanone-4-phosphate synthase activity	8	0	0	0	0.0223815	0	0	0.0919737	0	0
MF	GO:0015089	high-affinity copper ion transmembrane transporter activity	8	0	0	0	0.0223815	0	0	0	0	0
MF	GO:0043495	protein membrane anchor	8	0	0	0	0.0223815	0	0	0.0919737	0	0
MF	GO:0005261	cation channel activity	17	0	0	0	0.0157658	0	0	0	0	0
MF	GO:0019789	SUMO transferase activity	17	0	0	0	0.0157658	0	0	0	0	0
BP	GO:0052543	callose deposition in cell wall	119	0	0	0	0.00943267	0	0	0	0	0
BP	GO:0045892	negative regulation of transcription, DNA-templated	507	0	0.167085	0	0.00783438	0	0	0.093694	0.121316	0
BP	GO:0006955	immune response	32	0	0	0	0.00444604	0	0	0	0	0
MF	GO:0046872	metal ion binding	198	0	0	0	0.00325542	0	0	0	0	0
MF	GO:0016720	delta12-fatty acid dehydrogenase activity	3	0	0.685105	0	0	0	0	0	0	0
CC	GO:0005575	cellular_component	1459	0	0.675401	0	0	0	0	0	0	0
MF	GO:0045548	phenylalanine ammonia-lyase activity	11	0	0.485251	0	0	0	0	0	0	0
BP	GO:0006108	malate metabolic process	15	0	0.39451	0	0	0	0	0	0.0714282	0
BP	GO:0055081	anion homeostasis	6	0	0.393747	0	0	0	0	0	0	0
BP	GO:0009636	response to toxic substance	27	0	0.383148	0	0	0	0	0	0.212996	0
BP	GO:0010492	maintenance of shoot apical meristem identity	43	0	0.305669	0	0	0	0	0	0	0
BP	GO:0010315	auxin efflux	45	0	0.245834	0	0	0	0	0	0	0
BP	GO:0061062	regulation of nematode larval development	8	0	0.226174	0	0	0	0	0	0	0
BP	GO:1901599	(-)-pinoresinol biosynthetic process	8	0	0.226174	0	0	0	0	0	0	0
BP	GO:0006631	fatty acid metabolic process	78	0	0.212308	0	0	0	0	0	0.0517526	0
MF	GO:0004470	malic enzyme activity	15	0	0.198796	0	0	0	0	0	0	0
MF	GO:0016652	oxidoreductase activity, acting on NAD(P)H, NAD(P) as acceptor	15	0	0.198796	0	0	0	0	0	0	0
MF	GO:0008081	phosphoric diester hydrolase activity	27	0	0.179649	0	0	0	0	0	0	0
BP	GO:0042178	xenobiotic catabolic process	9	0	0.163822	0	0	0	0	0	0	0
BP	GO:0009072	aromatic amino acid family metabolic process	135	0	0.147805	0	0	0	0	0.126307	0.544835	0
BP	GO:0042761	very long-chain fatty acid biosynthetic process	35	0	0.147151	0	0	0	0	0	0.0254064	0
BP	GO:0035725	sodium ion transmembrane transport	67	0	0.130587	0	0	0	0	0	0	0
BP	GO:0016311	dephosphorylation	10	0	0.128448	0	0	0	0	0	0	0
BP	GO:0055047	generative cell mitosis	10	0	0.128448	0	0	0	0	0	0	0
BP	GO:0007169	transmembrane receptor protein tyrosine kinase signaling pathway	335	0	0.110561	0	0	0	0	0	0.115325	0
BP	GO:0048443	stamen development	198	0	0.0962874	0	0	0	0	0	0	0
BP	GO:0047484	regulation of response to osmotic stress	11	0	0.07399	0	0	0	0	0	0	0
BP	GO:0019748	secondary metabolic process	146	0	0.0596455	0	0	0	0	0.0144269	0.389357	0
BP	GO:0033542	fatty acid beta-oxidation, unsaturated, even number	2	0	0.0596455	0	0	0	0	0	0	0
BP	GO:0030643	cellular phosphate ion homeostasis	12	0	0.0506336	0	0	0	0	0	0.184833	0
CC	GO:0008287	protein serine/threonine phosphatase complex	15	0	0.0389742	0	0	0	0	0	0	0
CC	GO:0016602	CCAAT-binding factor complex	40	0	0.0389742	0	0	0	0	0	0	0
MF	GO:0005199	structural constituent of cell wall	31	0	0.0188306	0	0	0	0.680352	0	0	0
MF	GO:0042349	guiding stereospecific synthesis activity	8	0	0.0188306	0	0	0	0	0	0	0
MF	GO:0042626	ATPase activity, coupled to transmembrane movement of substances	236	0	0.0188306	0	0	0	0	0	0	0
BP	GO:0007231	osmosensory signaling pathway	13	0	0.00283205	0	0	0	0	0.0019106	0.132674	0
BP	GO:0033500	carbohydrate homeostasis	13	0	0.00283205	0	0	0	0	0.0019106	0.132674	0
BP	GO:0000096	sulfur amino acid metabolic process	152	0	0.00209391	0	0	0	0	0	0.312483	0
MF	GO:0005385	zinc ion transmembrane transporter activity	35	0	0	0	0	0	7.02528	0	0	0
MF	GO:0008324	cation transmembrane transporter activity	53	0	0	0	0	0	6.18733	0	0	0
BP	GO:0006812	cation transport	95	0	0	0	0	0	4.15392	0	0	0
MF	GO:0005381	iron ion transmembrane transporter activity	29	0	0	0	0	0	3.82438	0	0	0
BP	GO:0006829	zinc ion transport	35	0	0	0	0	0	3.14161	0	0	0
MF	GO:0046873	metal ion transmembrane transporter activity	74	0	0	0	0	0	2.2917	0	0	0
BP	GO:0030001	metal ion transport	97	0	0	0	0	0	1.75755	0	0	0
BP	GO:0006302	double-strand break repair	107	0	0	0	0	0	1.66995	0	0	0
MF	GO:0015085	calcium ion transmembrane transporter activity	8	0	0	0	0	0	1.55281	0	0	0
BP	GO:0030026	cellular manganese ion homeostasis	14	0	0	0	0	0	1.15381	0	0	0
BP	GO:0010332	response to gamma radiation	187	0	0	0	0	0	1.07504	0	0	0
MF	GO:0015369	calcium:proton antiporter activity	15	0	0	0	0	0	1.0494	0	0	0
MF	GO:0003968	RNA-directed 5'-3' RNA polymerase activity	18	0	0	0	0	0	0.99661	0	0	0
MF	GO:0015368	calcium:cation antiporter activity	17	0	0	0	0	0	0.99661	0	0	0
BP	GO:0006878	cellular copper ion homeostasis	26	0	0	0	0	0	0.796403	0	0	0
BP	GO:0019430	removal of superoxide radicals	26	0	0	0	0	0	0.796403	0	0	0
BP	GO:0019915	lipid storage	269	0	0	0	0	0	0.698168	0	0	0
BP	GO:0009933	meristem structural organization	294	0	0	0	0	0	0.667543	0	0	0
BP	GO:0016441	posttranscriptional gene silencing	38	0	0	0	0	0	0.667543	0	0	0
BP	GO:0044242	cellular lipid catabolic process	37	0	0	0	0	0	0.667543	0	0	0
BP	GO:0050826	response to freezing	286	0	0	0	0	0	0.667543	0	0	0
BP	GO:0010228	vegetative to reproductive phase transition of meristem	986	0	0	0	0	0	0.63569	0	0	0
BP	GO:0006826	iron ion transport	318	0	0	0	0	0	0.576389	0	0	0
BP	GO:0010106	cellular response to iron ion starvation	323	0	0	0	0	0	0.566965	0	0	0
BP	GO:0010182	sugar mediated signaling pathway	336	0	0	0	0	0	0.520354	0	0	0
MF	GO:0008794	arsenate reductase (glutaredoxin) activity	46	0	0	0	0	0	0.402847	0	0	1.13564
MF	GO:0047893	flavonol 3-O-glucosyltransferase activity	2	0	0	0	0	0	0.385258	0	0	0
BP	GO:0006882	cellular zinc ion homeostasis	69	0	0	0	0	0	0.248802	0	0	0
BP	GO:0010162	seed dormancy process	417	0	0	0	0	0	0.233552	0	0	0
BP	GO:0009736	cytokinin-activated signaling pathway	234	0	0	0	0	0	0.163036	0	0	0
MF	GO:0019825	oxygen binding	403	0	0	0	0	0	0.146802	0	0	0
MF	GO:0043394	proteoglycan binding	4	0	0	0	0	0	0.136176	0	0	0
BP	GO:0006471	protein ADP-ribosylation	7	0	0	0	0	0	0.0948122	0	0	0
BP	GO:0048522	positive regulation of cellular process	93	0	0	0	0	0	0.0948122	0	0	0
BP	GO:0051176	positive regulation of sulfur metabolic process	7	0	0	0	0	0	0.0948122	0	0	0
BP	GO:0009845	seed germination	511	0	0	0	0	0	0.0387458	0	0	0
MF	GO:0003862	3-isopropylmalate dehydrogenase activity	6	0	0	0	0	0	0.00663813	0	0	0
MF	GO:0010177	2-(2'-methylthio)ethylmalate synthase activity	12	0	0	3.13944	0	0	0	0	0	0
BP	GO:0019761	glucosinolate biosynthetic process	556	0	0	0.976806	0	0	0	0	0	0
BP	GO:0009684	indoleacetic acid biosynthetic process	328	0	0	0.790429	0	0	0	0.0291835	0	0
BP	GO:0006540	glutamate decarboxylation to succinate	9	0	0	0.551535	0	0	0	0	0	0
BP	GO:0009450	gamma-aminobutyric acid catabolic process	9	0	0	0.551535	0	0	0	0	0	0
MF	GO:0016836	hydro-lyase activity	8	0	0	0.144366	0	0	0	0	0	0
BP	GO:0010730	negative regulation of hydrogen peroxide biosynthetic process	1	0	0	0.0541144	0	0	0	0	0	0
BP	GO:0000002	mitochondrial genome maintenance	5	0	0	0	0	0	0	0	0	0
BP	GO:0000003	reproduction	59	0	0	0	0	0	0	0	0	0
BP	GO:0000012	single strand break repair	4	0	0	0	0	0	0	0	0	0
BP	GO:0000024	maltose biosynthetic process	4	0	0	0	0	0	0	0	0	0
BP	GO:0000025	maltose catabolic process	4	0	0	0	0	0	0	0	0	0
BP	GO:0000028	ribosomal small subunit assembly	16	0	0	0	0	0	0	0	0	0
BP	GO:0000038	very long-chain fatty acid metabolic process	147	0	0	0	0	0	0	0	0	0
BP	GO:0000045	autophagosome assembly	2	0	0	0	0	0	0	0	0	0
BP	GO:0000060	protein import into nucleus, translocation	17	0	0	0	0	0	0	0	0	0
BP	GO:0000076	DNA replication checkpoint	8	0	0	0	0	0	0	0	0	0
BP	GO:0000077	DNA damage checkpoint	8	0	0	0	0	0	0	0	0	0
BP	GO:0000079	regulation of cyclin-dependent protein serine/threonine kinase activity	3	0	0	0	0	0	0	0	0	0
BP	GO:0000082	G1/S transition of mitotic cell cycle	18	0	0	0	0	0	0	0	0	0
BP	GO:0000086	G2/M transition of mitotic cell cycle	7	0	0	0	0	0	0	0	0	0
BP	GO:0000087	mitotic M phase	2	0	0	0	0	0	0	0	0	0
BP	GO:0000105	histidine biosynthetic process	27	0	0	0	0	0	0	0	0	0
BP	GO:0000154	rRNA modification	5	0	0	0	0	0	0	0	0	0
BP	GO:0000162	tryptophan biosynthetic process	49	0	0	0	0	0	0	0	0	0
BP	GO:0000169	activation of MAPK activity involved in osmosensory signaling pathway	2	0	0	0	0	0	0	0	0	0
BP	GO:0000184	nuclear-transcribed mRNA catabolic process, nonsense-mediated decay	19	0	0	0	0	0	0	0	0	0
BP	GO:0000209	protein polyubiquitination	8	0	0	0	0	0	0	0	0	0
BP	GO:0000226	microtubule cytoskeleton organization	468	0	0	0	0	0	0	0	0	0
BP	GO:0000237	leptotene	2	0	0	0	0	0	0	0	0	0
BP	GO:0000238	zygotene	2	0	0	0	0	0	0	0	0	0
BP	GO:0000245	spliceosomal complex assembly	8	0	0	0	0	0	0	0	0	0
BP	GO:0000256	allantoin catabolic process	8	0	0	0	0	0	0	0	0	0
BP	GO:0000266	mitochondrial fission	19	0	0	0	0	0	0	0	0	0
BP	GO:0000271	polysaccharide biosynthetic process	343	0	0	0	0	0	0	0	0	0
BP	GO:0000272	polysaccharide catabolic process	97	0	0	0	0	0	0	0	0	0
BP	GO:0000278	mitotic cell cycle	532	0	0	0	0	0	0	0	0	0
BP	GO:0000280	nuclear division	137	0	0	0	0	0	0	0	0	0
BP	GO:0000289	nuclear-transcribed mRNA poly(A) tail shortening	10	0	0	0	0	0	0	0	0	0
BP	GO:0000291	nuclear-transcribed mRNA catabolic process, exonucleolytic	3	0	0	0	0	0	0	0	0	0
BP	GO:0000302	response to reactive oxygen species	114	0	0	0	0	0	0	0	0	0
BP	GO:0000338	protein deneddylation	14	0	0	0	0	0	0	0	0	0
BP	GO:0000354	cis assembly of pre-catalytic spliceosome	2	0	0	0	0	0	0	0	0	0
BP	GO:0000372	Group I intron splicing	2	0	0	0	0	0	0	0	0	0
BP	GO:0000373	Group II intron splicing	26	0	0	0	0	0	0	0	0	0
BP	GO:0000394	RNA splicing, via endonucleolytic cleavage and ligation	422	0	0	0	0	0	0	0	0	0
BP	GO:0000398	mRNA splicing, via spliceosome	297	0	0	0	0	0	0	0	0	0
BP	GO:0000413	protein peptidyl-prolyl isomerization	59	0	0	0	0	0	0	0	0	0
BP	GO:0000447	endonucleolytic cleavage in ITS1 to separate SSU-rRNA from 5.8S rRNA and LSU-rRNA from tricistronic rRNA transcript (SSU-rRNA, 5.8S rRNA, LSU-rRNA)	18	0	0	0	0	0	0	0	0	0
BP	GO:0000461	endonucleolytic cleavage to generate mature 3'-end of SSU-rRNA from (SSU-rRNA, 5.8S rRNA, LSU-rRNA)	18	0	0	0	0	0	0	0	0	0
BP	GO:0000462	maturation of SSU-rRNA from tricistronic rRNA transcript (SSU-rRNA, 5.8S rRNA, LSU-rRNA)	16	0	0	0	0	0	0	0	0	0
BP	GO:0000469	cleavage involved in rRNA processing	3	0	0	0	0	0	0	0	0	0
BP	GO:0000478	endonucleolytic cleavage involved in rRNA processing	40	0	0	0	0	0	0	0	0	0
BP	GO:0000488	maturation of LSU-rRNA from tetracistronic rRNA transcript (SSU-rRNA, LSU-rRNA, 4.5S-rRNA, 5S-rRNA)	2	0	0	0	0	0	0	0	0	0
BP	GO:0000489	maturation of SSU-rRNA from tetracistronic rRNA transcript (SSU-rRNA, LSU-rRNA, 4.5S-rRNA, 5S-rRNA)	2	0	0	0	0	0	0	0	0	0
BP	GO:0000491	small nucleolar ribonucleoprotein complex assembly	3	0	0	0	0	0	0	0	0	0
BP	GO:0000578	embryonic axis specification	7	0	0	0	0	0	0	0	0	0
BP	GO:0000706	meiotic DNA double-strand break processing	3	0	0	0	0	0	0	0	0	0
BP	GO:0000710	meiotic mismatch repair	16	0	0	0	0	0	0	0	0	0
BP	GO:0000712	resolution of meiotic recombination intermediates	11	0	0	0	0	0	0	0	0	0
BP	GO:0000723	telomere maintenance	19	0	0	0	0	0	0	0	0	0
BP	GO:0000724	double-strand break repair via homologous recombination	175	0	0	0	0	0	0	0	0	0
BP	GO:0000731	DNA synthesis involved in DNA repair	4	0	0	0	0	0	0	0	0	0
BP	GO:0000738	DNA catabolic process, exonucleolytic	2	0	0	0	0	0	0	0	0	0
BP	GO:0000740	nuclear membrane fusion	4	0	0	0	0	0	0	0	0	0
BP	GO:0000741	karyogamy	123	0	0	0	0	0	0	0	0	0
BP	GO:0000819	sister chromatid segregation	2	0	0	0	0	0	0	0	0	0
BP	GO:0000902	cell morphogenesis	272	0	0	0	0	0	0	0	0	0
BP	GO:0000904	cell morphogenesis involved in differentiation	6	0	0	0	0	0	0	0	0	0
BP	GO:0000911	cytokinesis by cell plate formation	625	0	0	0	0	0	0	0	0	0
BP	GO:0000913	preprophase band assembly	15	0	0	0	0	0	0	0	0	0
BP	GO:0000914	phragmoplast assembly	16	0	0	0	0	0	0	0	0	0
BP	GO:0000919	cell plate assembly	19	0	0	0	0	0	0	0	0	0
BP	GO:0000956	nuclear-transcribed mRNA catabolic process	315	0	0	0	0	0	0	0	0	0
BP	GO:0000957	mitochondrial RNA catabolic process	3	0	0	0	0	0	0	0	0	0
BP	GO:0000963	mitochondrial RNA processing	6	0	0	0	0	0	0	0	0	0
BP	GO:0001510	RNA methylation	696	0	0	0	0	0	0	0	0	0
BP	GO:0001558	regulation of cell growth	14	0	0	0	0	0	0	0	0	0
BP	GO:0001560	regulation of cell growth by extracellular stimulus	6	0	0	0	0	0	0	0	0	0
BP	GO:0001561	fatty acid alpha-oxidation	5	0	0	0	0	0	0	0	0	0
BP	GO:0001578	microtubule bundle formation	10	0	0	0	0	0	0	0	0	0
BP	GO:0001676	long-chain fatty acid metabolic process	78	0	0	0	0	0	0	0	0	0
BP	GO:0001682	tRNA 5'-leader removal	4	0	0	0	0	0	0	0	0	0
BP	GO:0001708	cell fate specification	85	0	0	0	0	0	0	0	0	0
BP	GO:0001709	cell fate determination	14	0	0	0	0	0	0	0	0	0
BP	GO:0001736	establishment of planar polarity	13	0	0	0	0	0	0	0	0	0
BP	GO:0001778	plasma membrane repair	2	0	0	0	0	0	0	0	0	0
BP	GO:0001881	receptor recycling	4	0	0	0	0	0	0	0	0	0
BP	GO:0001887	selenium compound metabolic process	10	0	0	0	0	0	0	0	0	0
BP	GO:0001932	regulation of protein phosphorylation	5	0	0	0	0	0	0	0	0	0
BP	GO:0001944	vasculature development	15	0	0	0	0	0	0	0	0	0
BP	GO:0002098	tRNA wobble uridine modification	8	0	0	0	0	0	0	0	0	0
BP	GO:0002100	tRNA wobble adenosine to inosine editing	3	0	0	0	0	0	0	0	0	0
BP	GO:0002229	defense response to oomycetes	41	0	0	0	0	0	0	0	0	0
BP	GO:0002540	leukotriene production involved in inflammatory response	4	0	0	0	0	0	0	0	0	0
BP	GO:0002752	cell surface pattern recognition receptor signaling pathway	2	0	0	0	0	0	0	0	0	0
BP	GO:0003002	regionalization	64	0	0	0	0	0	0	0	0	0
BP	GO:0003006	developmental process involved in reproduction	19	0	0	0	0	0	0	0	0	0
BP	GO:0005513	detection of calcium ion	22	0	0	0	0	0	0	0	0	0
BP	GO:0005975	carbohydrate metabolic process	248	0	0	0	0	0	0	0	0	0
BP	GO:0005976	polysaccharide metabolic process	5	0	0	0	0	0	0	0	0	0
BP	GO:0005982	starch metabolic process	153	0	0	0	0	0	0	0	0	0
BP	GO:0005983	starch catabolic process	58	0	0	0	0	0	0	0	0	0
BP	GO:0005985	sucrose metabolic process	24	0	0	0	0	0	0	0	0	0
BP	GO:0005987	sucrose catabolic process	12	0	0	0	0	0	0	0	0	0
BP	GO:0005991	trehalose metabolic process	5	0	0	0	0	0	0	0	0	0
BP	GO:0005996	monosaccharide metabolic process	4	0	0	0	0	0	0	0	0	0
BP	GO:0005997	xylulose metabolic process	2	0	0	0	0	0	0	0	0	0
BP	GO:0006000	fructose metabolic process	17	0	0	0	0	0	0	0	0	0
BP	GO:0006002	fructose 6-phosphate metabolic process	6	0	0	0	0	0	0	0	0	0
BP	GO:0006003	fructose 2,6-bisphosphate metabolic process	6	0	0	0	0	0	0	0	0	0
BP	GO:0006005	L-fucose biosynthetic process	2	0	0	0	0	0	0	0	0	0
BP	GO:0006006	glucose metabolic process	21	0	0	0	0	0	0	0	0	0
BP	GO:0006007	glucose catabolic process	449	0	0	0	0	0	0	0	0	0
BP	GO:0006011	UDP-glucose metabolic process	4	0	0	0	0	0	0	0	0	0
BP	GO:0006012	galactose metabolic process	43	0	0	0	0	0	0	0	0	0
BP	GO:0006020	inositol metabolic process	8	0	0	0	0	0	0	0	0	0
BP	GO:0006021	inositol biosynthetic process	12	0	0	0	0	0	0	0	0	0
BP	GO:0006042	glucosamine biosynthetic process	4	0	0	0	0	0	0	0	0	0
BP	GO:0006044	N-acetylglucosamine metabolic process	4	0	0	0	0	0	0	0	0	0
BP	GO:0006047	UDP-N-acetylglucosamine metabolic process	6	0	0	0	0	0	0	0	0	0
BP	GO:0006048	UDP-N-acetylglucosamine biosynthetic process	11	0	0	0	0	0	0	0	0	0
BP	GO:0006065	UDP-glucuronate biosynthetic process	11	0	0	0	0	0	0	0	0	0
BP	GO:0006066	alcohol metabolic process	4	0	0	0	0	0	0	0	0	0
BP	GO:0006071	glycerol metabolic process	46	0	0	0	0	0	0	0	0	0
BP	GO:0006072	glycerol-3-phosphate metabolic process	11	0	0	0	0	0	0	0	0	0
BP	GO:0006075	(1->3)-beta-D-glucan biosynthetic process	37	0	0	0	0	0	0	0	0	0
BP	GO:0006083	acetate metabolic process	5	0	0	0	0	0	0	0	0	0
BP	GO:0006084	acetyl-CoA metabolic process	277	0	0	0	0	0	0	0	0	0
BP	GO:0006086	acetyl-CoA biosynthetic process from pyruvate	7	0	0	0	0	0	0	0	0	0
BP	GO:0006091	generation of precursor metabolites and energy	131	0	0	0	0	0	0	0	0	0
BP	GO:0006097	glyoxylate cycle	2	0	0	0	0	0	0	0	0	0
BP	GO:0006099	tricarboxylic acid cycle	51	0	0	0	0	0	0	0	0	0
BP	GO:0006101	citrate metabolic process	9	0	0	0	0	0	0	0	0	0
BP	GO:0006102	isocitrate metabolic process	31	0	0	0	0	0	0	0	0	0
BP	GO:0006105	succinate metabolic process	6	0	0	0	0	0	0	0	0	0
BP	GO:0006110	regulation of glycolytic process	4	0	0	0	0	0	0	0	0	0
BP	GO:0006120	mitochondrial electron transport, NADH to ubiquinone	28	0	0	0	0	0	0	0	0	0
BP	GO:0006121	mitochondrial electron transport, succinate to ubiquinone	19	0	0	0	0	0	0	0	0	0
BP	GO:0006122	mitochondrial electron transport, ubiquinol to cytochrome c	20	0	0	0	0	0	0	0	0	0
BP	GO:0006127	glycerophosphate shuttle	4	0	0	0	0	0	0	0	0	0
BP	GO:0006139	nucleobase-containing compound metabolic process	11	0	0	0	0	0	0	0	0	0
BP	GO:0006145	purine nucleobase catabolic process	16	0	0	0	0	0	0	0	0	0
BP	GO:0006148	inosine catabolic process	7	0	0	0	0	0	0	0	0	0
BP	GO:0006152	purine nucleoside catabolic process	6	0	0	0	0	0	0	0	0	0
BP	GO:0006154	adenosine catabolic process	4	0	0	0	0	0	0	0	0	0
BP	GO:0006164	purine nucleotide biosynthetic process	118	0	0	0	0	0	0	0	0	0
BP	GO:0006166	purine ribonucleoside salvage	2	0	0	0	0	0	0	0	0	0
BP	GO:0006167	AMP biosynthetic process	6	0	0	0	0	0	0	0	0	0
BP	GO:0006169	adenosine salvage	9	0	0	0	0	0	0	0	0	0
BP	GO:0006176	dATP biosynthetic process from ADP	3	0	0	0	0	0	0	0	0	0
BP	GO:0006178	guanine salvage	2	0	0	0	0	0	0	0	0	0
BP	GO:0006182	cGMP biosynthetic process	3	0	0	0	0	0	0	0	0	0
BP	GO:0006189	'de novo' IMP biosynthetic process	4	0	0	0	0	0	0	0	0	0
BP	GO:0006207	'de novo' pyrimidine nucleobase biosynthetic process	14	0	0	0	0	0	0	0	0	0
BP	GO:0006212	uracil catabolic process	11	0	0	0	0	0	0	0	0	0
BP	GO:0006218	uridine catabolic process	5	0	0	0	0	0	0	0	0	0
BP	GO:0006221	pyrimidine nucleotide biosynthetic process	5	0	0	0	0	0	0	0	0	0
BP	GO:0006259	DNA metabolic process	93	0	0	0	0	0	0	0	0	0
BP	GO:0006260	DNA replication	284	0	0	0	0	0	0	0	0	0
BP	GO:0006261	DNA-dependent DNA replication	258	0	0	0	0	0	0	0	0	0
BP	GO:0006264	mitochondrial DNA replication	6	0	0	0	0	0	0	0	0	0
BP	GO:0006265	DNA topological change	34	0	0	0	0	0	0	0	0	0
BP	GO:0006266	DNA ligation	10	0	0	0	0	0	0	0	0	0
BP	GO:0006268	DNA unwinding involved in DNA replication	33	0	0	0	0	0	0	0	0	0
BP	GO:0006269	DNA replication, synthesis of RNA primer	4	0	0	0	0	0	0	0	0	0
BP	GO:0006270	DNA replication initiation	174	0	0	0	0	0	0	0	0	0
BP	GO:0006271	DNA strand elongation involved in DNA replication	5	0	0	0	0	0	0	0	0	0
BP	GO:0006275	regulation of DNA replication	315	0	0	0	0	0	0	0	0	0
BP	GO:0006278	RNA-dependent DNA biosynthetic process	1	0	0	0	0	0	0	0	0	0
BP	GO:0006279	premeiotic DNA replication	3	0	0	0	0	0	0	0	0	0
BP	GO:0006281	DNA repair	296	0	0	0	0	0	0	0	0	0
BP	GO:0006282	regulation of DNA repair	6	0	0	0	0	0	0	0	0	0
BP	GO:0006284	base-excision repair	28	0	0	0	0	0	0	0	0	0
BP	GO:0006287	base-excision repair, gap-filling	2	0	0	0	0	0	0	0	0	0
BP	GO:0006289	nucleotide-excision repair	17	0	0	0	0	0	0	0	0	0
BP	GO:0006290	pyrimidine dimer repair	7	0	0	0	0	0	0	0	0	0
BP	GO:0006294	nucleotide-excision repair, preincision complex assembly	2	0	0	0	0	0	0	0	0	0
BP	GO:0006296	nucleotide-excision repair, DNA incision, 5'-to lesion	2	0	0	0	0	0	0	0	0	0
BP	GO:0006297	nucleotide-excision repair, DNA gap filling	2	0	0	0	0	0	0	0	0	0
BP	GO:0006298	mismatch repair	34	0	0	0	0	0	0	0	0	0
BP	GO:0006301	postreplication repair	112	0	0	0	0	0	0	0	0	0
BP	GO:0006303	double-strand break repair via nonhomologous end joining	5	0	0	0	0	0	0	0	0	0
BP	GO:0006306	DNA methylation	466	0	0	0	0	0	0	0	0	0
BP	GO:0006308	DNA catabolic process	14	0	0	0	0	0	0	0	0	0
BP	GO:0006310	DNA recombination	128	0	0	0	0	0	0	0	0	0
BP	GO:0006311	meiotic gene conversion	4	0	0	0	0	0	0	0	0	0
BP	GO:0006312	mitotic recombination	143	0	0	0	0	0	0	0	0	0
BP	GO:0006325	chromatin organization	74	0	0	0	0	0	0	0	0	0
BP	GO:0006333	chromatin assembly or disassembly	132	0	0	0	0	0	0	0	0	0
BP	GO:0006334	nucleosome assembly	55	0	0	0	0	0	0	0	0	0
BP	GO:0006338	chromatin remodeling	42	0	0	0	0	0	0	0	0	0
BP	GO:0006342	chromatin silencing	375	0	0	0	0	0	0	0	0	0
BP	GO:0006344	maintenance of chromatin silencing	11	0	0	0	0	0	0	0	0	0
BP	GO:0006346	methylation-dependent chromatin silencing	366	0	0	0	0	0	0	0	0	0
BP	GO:0006349	regulation of gene expression by genetic imprinting	36	0	0	0	0	0	0	0	0	0
BP	GO:0006351	transcription, DNA-templated	137	0	0	0	0	0	0	0	0	0
BP	GO:0006353	DNA-templated transcription, termination	2	0	0	0	0	0	0	0	0	0
BP	GO:0006354	DNA-templated transcription, elongation	304	0	0	0	0	0	0	0	0	0
BP	GO:0006357	regulation of transcription by RNA polymerase II	8	0	0	0	0	0	0	0	0	0
BP	GO:0006360	transcription by RNA polymerase I	5	0	0	0	0	0	0	0	0	0
BP	GO:0006366	transcription by RNA polymerase II	158	0	0	0	0	0	0	0	0	0
BP	GO:0006367	transcription initiation from RNA polymerase II promoter	8	0	0	0	0	0	0	0	0	0
BP	GO:0006370	7-methylguanosine mRNA capping	12	0	0	0	0	0	0	0	0	0
BP	GO:0006378	mRNA polyadenylation	17	0	0	0	0	0	0	0	0	0
BP	GO:0006379	mRNA cleavage	4	0	0	0	0	0	0	0	0	0
BP	GO:0006388	tRNA splicing, via endonucleolytic cleavage and ligation	12	0	0	0	0	0	0	0	0	0
BP	GO:0006396	RNA processing	424	0	0	0	0	0	0	0	0	0
BP	GO:0006397	mRNA processing	75	0	0	0	0	0	0	0	0	0
BP	GO:0006399	tRNA metabolic process	110	0	0	0	0	0	0	0	0	0
BP	GO:0006401	RNA catabolic process	10	0	0	0	0	0	0	0	0	0
BP	GO:0006402	mRNA catabolic process	8	0	0	0	0	0	0	0	0	0
BP	GO:0006406	mRNA export from nucleus	199	0	0	0	0	0	0	0	0	0
BP	GO:0006407	rRNA export from nucleus	18	0	0	0	0	0	0	0	0	0
BP	GO:0006409	tRNA export from nucleus	9	0	0	0	0	0	0	0	0	0
BP	GO:0006412	translation	1169	0	0	0	0	0	0	0	0	0
BP	GO:0006413	translational initiation	150	0	0	0	0	0	0	0	0	0
BP	GO:0006414	translational elongation	101	0	0	0	0	0	0	0	0	0
BP	GO:0006417	regulation of translation	76	0	0	0	0	0	0	0	0	0
BP	GO:0006418	tRNA aminoacylation for protein translation	56	0	0	0	0	0	0	0	0	0
BP	GO:0006419	alanyl-tRNA aminoacylation	7	0	0	0	0	0	0	0	0	0
BP	GO:0006420	arginyl-tRNA aminoacylation	5	0	0	0	0	0	0	0	0	0
BP	GO:0006421	asparaginyl-tRNA aminoacylation	7	0	0	0	0	0	0	0	0	0
BP	GO:0006422	aspartyl-tRNA aminoacylation	4	0	0	0	0	0	0	0	0	0
BP	GO:0006423	cysteinyl-tRNA aminoacylation	7	0	0	0	0	0	0	0	0	0
BP	GO:0006426	glycyl-tRNA aminoacylation	10	0	0	0	0	0	0	0	0	0
BP	GO:0006427	histidyl-tRNA aminoacylation	5	0	0	0	0	0	0	0	0	0
BP	GO:0006430	lysyl-tRNA aminoacylation	5	0	0	0	0	0	0	0	0	0
BP	GO:0006431	methionyl-tRNA aminoacylation	2	0	0	0	0	0	0	0	0	0
BP	GO:0006432	phenylalanyl-tRNA aminoacylation	14	0	0	0	0	0	0	0	0	0
BP	GO:0006434	seryl-tRNA aminoacylation	6	0	0	0	0	0	0	0	0	0
BP	GO:0006436	tryptophanyl-tRNA aminoacylation	5	0	0	0	0	0	0	0	0	0
BP	GO:0006446	regulation of translational initiation	42	0	0	0	0	0	0	0	0	0
BP	GO:0006465	signal peptide processing	11	0	0	0	0	0	0	0	0	0
BP	GO:0006468	protein phosphorylation	876	0	0	0	0	0	0	0	0	0
BP	GO:0006469	negative regulation of protein kinase activity	2	0	0	0	0	0	0	0	0	0
BP	GO:0006470	protein dephosphorylation	134	0	0	0	0	0	0	0	0	0
BP	GO:0006473	protein acetylation	59	0	0	0	0	0	0	0	0	0
BP	GO:0006481	C-terminal protein methylation	3	0	0	0	0	0	0	0	0	0
BP	GO:0006486	protein glycosylation	420	0	0	0	0	0	0	0	0	0
BP	GO:0006487	protein N-linked glycosylation	352	0	0	0	0	0	0	0	0	0
BP	GO:0006490	oligosaccharide-lipid intermediate biosynthetic process	4	0	0	0	0	0	0	0	0	0
BP	GO:0006491	N-glycan processing	15	0	0	0	0	0	0	0	0	0
BP	GO:0006493	protein O-linked glycosylation	2	0	0	0	0	0	0	0	0	0
BP	GO:0006497	protein lipidation	2	0	0	0	0	0	0	0	0	0
BP	GO:0006499	N-terminal protein myristoylation	517	0	0	0	0	0	0	0	0	0
BP	GO:0006505	GPI anchor metabolic process	2	0	0	0	0	0	0	0	0	0
BP	GO:0006506	GPI anchor biosynthetic process	14	0	0	0	0	0	0	0	0	0
BP	GO:0006508	proteolysis	646	0	0	0	0	0	0	0	0	0
BP	GO:0006511	ubiquitin-dependent protein catabolic process	918	0	0	0	0	0	0	0	0	0
BP	GO:0006513	protein monoubiquitination	17	0	0	0	0	0	0	0	0	0
BP	GO:0006515	protein quality control for misfolded or incompletely synthesized proteins	11	0	0	0	0	0	0	0	0	0
BP	GO:0006516	glycoprotein catabolic process	12	0	0	0	0	0	0	0	0	0
BP	GO:0006520	cellular amino acid metabolic process	69	0	0	0	0	0	0	0	0	0
BP	GO:0006526	arginine biosynthetic process	23	0	0	0	0	0	0	0	0	0
BP	GO:0006535	cysteine biosynthetic process from serine	3	0	0	0	0	0	0	0	0	0
BP	GO:0006536	glutamate metabolic process	8	0	0	0	0	0	0	0	0	0
BP	GO:0006541	glutamine metabolic process	6	0	0	0	0	0	0	0	0	0
BP	GO:0006542	glutamine biosynthetic process	6	0	0	0	0	0	0	0	0	0
BP	GO:0006544	glycine metabolic process	22	0	0	0	0	0	0	0	0	0
BP	GO:0006546	glycine catabolic process	169	0	0	0	0	0	0	0	0.132674	0
BP	GO:0006555	methionine metabolic process	14	0	0	0	0	0	0	0	0	0
BP	GO:0006556	S-adenosylmethionine biosynthetic process	14	0	0	0	0	0	0	0	0	0
BP	GO:0006560	proline metabolic process	3	0	0	0	0	0	0	0.0019106	0.00456138	0
BP	GO:0006561	proline biosynthetic process	30	0	0	0	0	0	0	0	0	0
BP	GO:0006562	proline catabolic process	7	0	0	0	0	0	0	0	0	0
BP	GO:0006563	L-serine metabolic process	24	0	0	0	0	0	0	0	0	0
BP	GO:0006564	L-serine biosynthetic process	8	0	0	0	0	0	0	0	0	0
BP	GO:0006567	threonine catabolic process	42	0	0	0	0	0	0	0	0	0
BP	GO:0006568	tryptophan metabolic process	3	0	0	0	0	0	0	0	0	0
BP	GO:0006571	tyrosine biosynthetic process	11	0	0	0	0	0	0	0	0	0
BP	GO:0006574	valine catabolic process	6	0	0	0	0	0	0	0	0	0
BP	GO:0006580	ethanolamine metabolic process	6	0	0	0	0	0	0	0	0	0
BP	GO:0006593	ornithine catabolic process	2	0	0	0	0	0	0	0	0	0
BP	GO:0006596	polyamine biosynthetic process	36	0	0	0	0	0	0	0	0	0
BP	GO:0006598	polyamine catabolic process	186	0	0	0	0	0	0	0	0	0
BP	GO:0006605	protein targeting	94	0	0	0	0	0	0	0	0	0
BP	GO:0006606	protein import into nucleus	339	0	0	0	0	0	0	0	0	0
BP	GO:0006611	protein export from nucleus	12	0	0	0	0	0	0	0	0	0
BP	GO:0006617	SRP-dependent cotranslational protein targeting to membrane, signal sequence recognition	14	0	0	0	0	0	0	0	0	0
BP	GO:0006621	protein retention in ER lumen	4	0	0	0	0	0	0	0	0	0
BP	GO:0006623	protein targeting to vacuole	497	0	0	0	0	0	0	0	0	0
BP	GO:0006624	vacuolar protein processing	6	0	0	0	0	0	0	0	0	0
BP	GO:0006625	protein targeting to peroxisome	15	0	0	0	0	0	0	0	0	0
BP	GO:0006626	protein targeting to mitochondrion	313	0	0	0	0	0	0	0	0	0
BP	GO:0006629	lipid metabolic process	161	0	0	0	0	0	0	0	0	0
BP	GO:0006633	fatty acid biosynthetic process	198	0	0	0	0	0	0	0	0	0
BP	GO:0006637	acyl-CoA metabolic process	2	0	0	0	0	0	0	0	0	0
BP	GO:0006641	triglyceride metabolic process	5	0	0	0	0	0	0	0	0	0
BP	GO:0006642	triglyceride mobilization	4	0	0	0	0	0	0	0	0	0
BP	GO:0006643	membrane lipid metabolic process	7	0	0	0	0	0	0	0	0	0
BP	GO:0006646	phosphatidylethanolamine biosynthetic process	9	0	0	0	0	0	0	0	0	0
BP	GO:0006649	phospholipid transfer to membrane	4	0	0	0	0	0	0	0	0	0
BP	GO:0006650	glycerophospholipid metabolic process	4	0	0	0	0	0	0	0	0	0
BP	GO:0006651	diacylglycerol biosynthetic process	15	0	0	0	0	0	0	0	0	0
BP	GO:0006656	phosphatidylcholine biosynthetic process	20	0	0	0	0	0	0	0	0	0
BP	GO:0006659	phosphatidylserine biosynthetic process	6	0	0	0	0	0	0	0	0	0
BP	GO:0006661	phosphatidylinositol biosynthetic process	269	0	0	0	0	0	0	0	0	0
BP	GO:0006671	phytosphingosine metabolic process	5	0	0	0	0	0	0	0	0	0
BP	GO:0006672	ceramide metabolic process	2	0	0	0	0	0	0	0	0	0
BP	GO:0006694	steroid biosynthetic process	16	0	0	0	0	0	0	0	0	0
BP	GO:0006720	isoprenoid metabolic process	6	0	0	0	0	0	0	0	0	0
BP	GO:0006723	cuticle hydrocarbon biosynthetic process	10	0	0	0	0	0	0	0	0	0
BP	GO:0006725	cellular aromatic compound metabolic process	8	0	0	0	0	0	0	0	0	0
BP	GO:0006730	one-carbon metabolic process	56	0	0	0	0	0	0	0	0	0
BP	GO:0006739	NADP metabolic process	6	0	0	0	0	0	0	0	0	0
BP	GO:0006744	ubiquinone biosynthetic process	72	0	0	0	0	0	0	0	0	0
BP	GO:0006749	glutathione metabolic process	24	0	0	0	0	0	0	0.045721	0	0
BP	GO:0006750	glutathione biosynthetic process	13	0	0	0	0	0	0	0	0	0
BP	GO:0006751	glutathione catabolic process	10	0	0	0	0	0	0	0	0	0
BP	GO:0006754	ATP biosynthetic process	12	0	0	0	0	0	0	0	0	0
BP	GO:0006760	folic acid-containing compound metabolic process	5	0	0	0	0	0	0	0	0	0
BP	GO:0006772	thiamine metabolic process	4	0	0	0	0	0	0	0	0	0
BP	GO:0006777	Mo-molybdopterin cofactor biosynthetic process	16	0	0	0	0	0	0	0	0	0
BP	GO:0006779	porphyrin-containing compound biosynthetic process	35	0	0	0	0	0	0	0	0	0
BP	GO:0006780	uroporphyrinogen III biosynthetic process	2	0	0	0	0	0	0	0	0	0
BP	GO:0006783	heme biosynthetic process	60	0	0	0	0	0	0	0	0	0
BP	GO:0006788	heme oxidation	8	0	0	0	0	0	0	0	0	0
BP	GO:0006793	phosphorus metabolic process	3	0	0	0	0	0	0	0	0	0
BP	GO:0006796	phosphate-containing compound metabolic process	2	0	0	0	0	0	0	0	0	0
BP	GO:0006805	xenobiotic metabolic process	14	0	0	0	0	0	0	0	0	0
BP	GO:0006807	nitrogen compound metabolic process	48	0	0	0	0	0	0	0	0	0
BP	GO:0006808	regulation of nitrogen utilization	10	0	0	0	0	0	0	0	0	0
BP	GO:0006810	transport	476	0	0	0	0	0	0	0	0	0
BP	GO:0006816	calcium ion transport	476	0	0	0	0	0	0	0	0	0
BP	GO:0006820	anion transport	163	0	0	0	0	0	0	0	0	0
BP	GO:0006821	chloride transport	20	0	0	0	0	0	0	0	0	0
BP	GO:0006824	cobalt ion transport	5	0	0	0	0	0	0	0	0	0
BP	GO:0006825	copper ion transport	36	0	0	0	0	0	0	0	0	0
BP	GO:0006828	manganese ion transport	34	0	0	0	0	0	0	0	0	0
BP	GO:0006848	pyruvate transport	4	0	0	0	0	0	0	0	0	0
BP	GO:0006849	plasma membrane pyruvate transport	4	0	0	0	0	0	0	0	0	0
BP	GO:0006855	drug transmembrane transport	35	0	0	0	0	0	0	0	0	0
BP	GO:0006857	oligopeptide transport	315	0	0	0	0	0	0	0	0	0
BP	GO:0006858	extracellular transport	5	0	0	0	0	0	0	0	0	0
BP	GO:0006862	nucleotide transport	120	0	0	0	0	0	0	0	0	0
BP	GO:0006863	purine nucleobase transport	142	0	0	0	0	0	0	0	0	0
BP	GO:0006869	lipid transport	304	0	0	0	0	0	0	0	0	0
[truncated: 3,327 more rows]

## Sheet: -log10_Hyp_down
category	GO ID	GO TERM	totinCat	AV_Root_4h	AV_Root_24h	AV_Leaf_24h	ZS_Root_4h	ZS_Root_24h	ZS_Leaf_24h	both_Root_4h	both_Root_24h	both_Leaf_24h
[truncated: 4,652 more rows]

[truncated: 6 more sheets: GOtotal_genotype_Hyp, -log10_Avatar_high, -log10_ZS_high, GOtotal_GTxTR_Hyp, -log10_GTxTR_AV, -log10_GTxTR_ZS]
