# Supplementary material for: Transcriptional Response of Two Brassica napus Cultivars to Short-Term Hypoxia in the Root Zone
Source: Front Plant Sci. 2022 Apr 29;13:897673. doi: 10.3389/fpls.2022.897673 (PMC9100894; doi:10.3389/fpls.2022.897673)
Supplement: Supplementary file 5 [file Data_Sheet_5.XLSX]

## Sheet: Tabelle1
Supporting information
Table S4: Statistics for enrichment of affected genes (hypergeometric distributions)
	p-values calculated by the phyper function in R
	gray p-values are not significant (p > 0.05)
affected genes
	starvation up/down min10		number of transcripts in A.thaliana that were significantly up/down-regulated in all ten timepoints under starvation (Usadel et al. 2008, Cookson et al. 2016)
	hypoxia up/down min10		number of transcripts in A.thaliana that were significantly up/down-regulated in at least ten timepoints under oxygen deficiency (Mustroph et al. 2010)
	HRGs		number of hypoxia core-response transcripts in A.thaliana (Mustroph et al. 2009)
sample size		number of transcripts in B. napus that were significantly regulated under root hypoxia
sample affected genes		overlap between sample size and affected genes
		AV	Avatar
		ZS	Zhongshuang 9
		overlap	both genotypes
	total number of genes	total number of affected genes	sample size	sample affected genes	p-value (phyper)			total number of genes	total number of affected genes	sample size	sample affected genes	p-value (phyper)
treatment		starvation up min10							starvation down min10
R4h up AV	63569	278	5736	141	8.23565e-72		R4h up AV	63569	44	5736	5	0.364912
R4h down AV	63569	278	8983	19	0.999955		R4h down AV	63569	44	8983	17	5.24103e-05
R4h up ZS	63569	278	3948	58	3.18521e-16		R4h up ZS	63569	44	3948	5	0.135649
R4h down ZS	63569	278	7010	30	0.578503		R4h down ZS	63569	44	7010	12	0.00228664
R4h overlap up	63569	278	3145	57	4.91069e-20		R4h overlap up	63569	44	3145	3	0.372251
R4h overlap down	63569	278	5562	15	0.986546		R4h overlap down	63569	44	5562	11	0.00114861
R24h up AV	63569	278	2550	54	5.42954e-22		R24h up AV	63569	44	2550	3	0.258665
R24h down AV	63569	278	4415	20	0.468442		R24h down AV	63569	44	4415	6	0.0822062
R24h up ZS	63569	278	3061	35	2.42152e-07		R24h up ZS	63569	44	3061	3	0.356172
R24h down ZS	63569	278	5619	24	0.579066		R24h down ZS	63569	44	5619	14	1.55586e-05
R24h overlap up	63569	278	1729	29	8.8918e-10		R24h overlap up	63569	44	1729	2	0.337186
R24h overlap down	63569	278	2998	15	0.333758		R24h overlap down	63569	44	2998	4	0.152346
L24h up AV	63569	278	341	13	4.85448e-09		L24h up AV	63569	44	341	1	0.210806
L24h down AV	63569	278	564	2	0.707793		L24h down AV	63569	44	564	0	1
L24h up ZS	63569	278	112	1	0.388171		L24h up ZS	63569	44	112	0	1
L24h down ZS	63569	278	418	0	1		L24h down ZS	63569	44	418	0	1
L24h overlap up	63569	278	12	0	1		L24h overlap up	63569	44	12	0	1
L24h overlap down	63569	278	88	0	1		L24h overlap down	63569	44	88	0	1
treatment		hypoxia up min10							hypoxia down min10
R4h up AV	63569	2642	5736	978	0		R4h up AV	63569	2177	5736	87	1
R4h down AV	63569	2642	8983	176	1		R4h down AV	63569	2177	8983	1001	6.35583e-293
R4h up ZS	63569	2642	3948	735	4.32644e-285		R4h up ZS	63569	2177	3948	61	1
R4h down ZS	63569	2642	7010	169	1		R4h down ZS	63569	2177	7010	812	9.79359e-237
R4h overlap up	63569	2642	3145	655	7.82658e-281		R4h overlap up	63569	2177	3145	45	1
R4h overlap down	63569	2642	5562	113	1		R4h overlap down	63569	2177	5562	733	8.79809e-245
R24h up AV	63569	2642	2550	536	7.18186e-228		R24h up AV	63569	2177	2550	42	1
R24h down AV	63569	2642	4415	162	0.959128		R24h down AV	63569	2177	4415	514	2.58825e-140
R24h up ZS	63569	2642	3061	609	8.26537e-248		R24h up ZS	63569	2177	3061	43	1
R24h down ZS	63569	2642	5619	170	0.999999		R24h down ZS	63569	2177	5619	593	2.8929e-144
R24h overlap up	63569	2642	1729	448	3.07003e-228		R24h overlap up	63569	2177	1729	25	1
R24h overlap down	63569	2642	2998	103	0.982941		R24h overlap down	63569	2177	2998	388	6.40813e-118
L24h up AV	63569	2642	341	29	0.000247742		L24h up AV	63569	2177	341	24	0.000795356
L24h down AV	63569	2642	564	9	0.999832		L24h down AV	63569	2177	564	16	0.810734
L24h up ZS	63569	2642	112	16	1.64616e-05		L24h up ZS	63569	2177	112	6	0.1865
L24h down ZS	63569	2642	418	2	1		L24h down ZS	63569	2177	418	11	0.84964
L24h overlap up	63569	2642	12	1	0.399167		L24h overlap up	63569	2177	12	1	0.341765
L24h overlap down	63569	2642	88	0	1		L24h overlap down	63569	2177	88	2	0.80825
treatment		HRGs
R4h up AV	63569	161	5736	127	2.24333e-100
R4h down AV	63569	161	8983	7	0.999988
R4h up ZS	63569	161	3948	118	1.3974e-105
R4h down ZS	63569	161	7010	6	0.999782
R4h overlap up	63569	161	3145	117	1.86129e-115
R4h overlap down	63569	161	5562	4	0.999712
R24h up AV	63569	161	2550	121	1.51261e-133
R24h down AV	63569	161	4415	1	0.999991
R24h up ZS	63569	161	3061	118	1.422e-118
R24h down ZS	63569	161	5619	2	0.999994
R24h overlap up	63569	161	1729	115	3.14127e-142
R24h overlap down	63569	161	2998	1	0.999585
L24h up AV	63569	161	341	1	0.579816
L24h down AV	63569	161	564	2	0.418779
L24h up ZS	63569	161	112	0	1
L24h down ZS	63569	161	418	0	1
L24h overlap up	63569	161	12	0	1
L24h overlap down	63569	161	88	0	1
