# Supplementary material for: Transcriptional Response of Two Brassica napus Cultivars to Short-Term Hypoxia in the Root Zone
Source: Front Plant Sci. 2022 Apr 29;13:897673. doi: 10.3389/fpls.2022.897673 (PMC9100894; doi:10.3389/fpls.2022.897673)
Supplement: Supplementary file 6 [file Data_Sheet_6.XLSX]

## Sheet: descriptions
Supporting information
Table S5: Metabolism-related expression data
Heatmaps of different metabolic pathways of primary metabolism
Gene assignment to pathways was based on annotations of genes of Arabidopsis thaliana
according to Mustroph et al. 2014
color code	SLR
-3	0	3
-3	0	3
	FDR > 0.01
	gene not expressed in Bna

## Sheet: N metabolism
ID	pathway	localization	AGI	annotation	Name	logFC.Root_H4h_AV	logFC.Root_H24h_AV	logFC.Leaf_H24h_AV	logFC.Root_H4h_ZS	logFC.Root_H24h_ZS	logFC.Leaf_H24h_ZS	FDR.Root_H4h_AV	FDR.Root_H24h_AV	FDR.Leaf_H24h_AV	FDR.Root_H4h_ZS	FDR.Root_H24h_ZS	FDR.Leaf_H24h_ZS
BnaC06g20690D	ammonium	cytosol	AT1G77760	GNR1_NIA1_NR1__nitrate reductase 1	NIA1	-3.165	-2.06072	-0.789518	-3.74526	-2.59783	0.333154	6.94429e-06	0.00627837	0.57571	2.41632e-07	0.000417577	0.896948
BnaCnng60930D	ammonium	cytosol	AT1G77760	GNR1_NIA1_NR1__nitrate reductase 1	NIA1	-1.72378	-2.41083	-1.07678	-2.93906	-3.30415	-0.575714	0.0185876	0.00214311	0.57191	8.55809e-05	2.47276e-05	0.835434
BnaA07g33680D	ammonium	cytosol	AT1G77760	GNR1_NIA1_NR1__nitrate reductase 1	NIA1	1.56518	0.90942	-0.309387	1.46193	1.04528	-0.182489	5.09616e-07	0.00923192	0.655024	4.34351e-06	0.00193367	0.865993
BnaC06g38300D	ammonium	cytosol	AT1G77760	GNR1_NIA1_NR1__nitrate reductase 1	NIA1	1.7849	1.79275	-0.508577	1.92354	2.1071	-0.13765	5.84587e-07	1.92986e-06	0.450449	1.14179e-07	1.29693e-08	0.944269
BnaA07g33690D	ammonium	cytosol	AT1G77760	GNR1_NIA1_NR1__nitrate reductase 1	NIA1	1.75778	0.968085	-0.543844	1.85013	1.09779	-0.124666	8.62973e-08	0.00837801	0.350596	2.92341e-08	0.00199139	0.947586
BnaA02g18610D	ammonium	cytosol	AT1G77760	GNR1_NIA1_NR1__nitrate reductase 1	NIA1	-2.76724	-3.08842	-0.0456954	-2.97553	-1.99728	-2.17018	0.00970027	0.00316564	1	8.3405e-05	0.0128099	0.483003
BnaA07g20840D	ammonium	cytosol	AT1G77760	GNR1_NIA1_NR1__nitrate reductase 1	NIA1	-2.10463	-2.51208	-0.283114	-2.43695	-3.86696	0.367204	0.00572452	0.00224899	0.928934	0.00177689	2.85838e-06	0.892808
	ammonium	cytosol	AT1G37130	ATNR2_B29_CHL3_NIA2_NIA2-1_NR_NR2__nitrate reductase 2	NIA2
BnaA07g36300D	ammonium	plastid	AT2G15620	ATHNIR_NIR_NIR1__nitrite reductase 1	NIR1	-1.0152	-0.831973	-0.0725128	-0.915078	-1.23043	-0.363371	0.0194262	0.0898598	1	0.0445177	0.00651831	0.759504
BnaC07g05090D	ammonium	plastid	AT2G15620	ATHNIR_NIR_NIR1__nitrite reductase 1	NIR1	0.0416839	-0.533555	-0.378306	0.337795	-0.0744275	0.188317	0.935863	0.167243	0.576368	0.38939	0.898235	0.86351
BnaCnng63770D	ammonium	plastid	AT2G15620	ATHNIR_NIR_NIR1__nitrite reductase 1	NIR1	-1.69221	-1.22585	-0.601353	-1.46735	-0.65656	-0.381389	7.00302e-08	0.000286871	0.238542	5.27036e-06	0.0672789	0.598771
BnaA09g08530D	ammonium	plastid	AT2G15620	ATHNIR_NIR_NIR1__nitrite reductase 1	NIR1	-3.49267	-1.82516	-0.794321	-2.35142	-1.57371	-0.307344	3.24023e-20	2.19025e-06	0.155916	3.21636e-10	4.45738e-05	0.752677
BnaA07g04150D	ammonium	plastid	AT2G15620	ATHNIR_NIR_NIR1__nitrite reductase 1	NIR1	-1.21137	-0.880141	0.0547747	-1.30783	-1.60296	-0.838428	0.0178799	0.134883	1	0.0126698	0.0025054	0.436196
BnaA04g08160D	ammonium	cytosol	AT5G37600	ATGLN1;1_ATGSR1_GLN1;1_GSR 1__glutamine synthase clone R1	GLN1;1	-1.12112	-0.856095	-1.32863	-0.461438	-0.0351448	-0.28046	0.0458205	0.195525	0.0950207	0.497635	0.988937	0.886245
BnaC06g10000D	ammonium	cytosol	AT5G37600	ATGLN1;1_ATGSR1_GLN1;1_GSR 1__glutamine synthase clone R1	GLN1;1	0.858703	-0.263036	0.00031221	0.948997	1.56219	0.687389	0.348079	0.85339	1	0.311194	0.0801104	0.736471
BnaC04g30250D	ammonium	cytosol	AT5G37600	ATGLN1;1_ATGSR1_GLN1;1_GSR 1__glutamine synthase clone R1	GLN1;1	-1.70547	-1.14974	-1.32929	-1.63151	-1.46418	-0.164935	0.00024156	0.0270055	0.0350015	0.000621466	0.00311996	0.952728
BnaA02g12430D	ammonium	cytosol	AT1G66200	ATGSR2_GLN1;2_GSR2__glutamine synthase clone F11	GLN1;2	-0.86757	0.523199	-0.435271	-0.028414	1.40117	-0.0920388	0.000669694	0.0781586	0.3215	0.968577	5.40169e-08	0.952455
BnaA10g16560D	ammonium	cytosol	AT1G66200	ATGSR2_GLN1;2_GSR2__glutamine synthase clone F11	GLN1;2	1.64032	1.03669	0.206411	1.76555	-0.00243907	4.34397	7.79358e-09	0.000940561	0.801504	0.380863	1	0.151808
BnaA07g09480D	ammonium	cytosol	AT1G66200	ATGSR2_GLN1;2_GSR2__glutamine synthase clone F11	GLN1;2	-0.0019954	0.454676	0.747783	0.0110128	-0.0812607	-0.0351447	1	0.173776	0.0999797	1	0.861959	1
BnaCnng23850D	ammonium	cytosol	AT1G66200	ATGSR2_GLN1;2_GSR2__glutamine synthase clone F11	GLN1;2	-1.72325	0.0537631	-0.0232009	-1.49699	1.10493	0.132968	1.8072e-07	0.937575	1	9.00197e-06	0.00183159	0.938473
BnaA04g08400D	ammonium	cytosol	AT1G66200	ATGSR2_GLN1;2_GSR2__glutamine synthase clone F11	GLN1;2	0.363432	0.274355	1.16371	0.00639216	-0.138027	0.369698	0.531342	0.723514	0.136414	1	0.867756	0.791962
BnaC05g35690D	ammonium	cytosol	AT3G17820	ATGSKB6_GLN1.3_GLN1;3__glutamine synthetase 1.3	GLN1;3	-0.283031	-0.634023	0.324709	-0.192182	-0.293155	0.291363	0.369439	0.042414	0.573484	0.598479	0.402742	0.664686
BnaA03g34780D	ammonium	cytosol	AT3G17820	ATGSKB6_GLN1.3_GLN1;3__glutamine synthetase 1.3	GLN1;3	0.349646	1.56271	0.0266175	1.33562	1.17635	-0.469961	0.678317	0.0553468	1	0.0540463	0.119833	0.816168
BnaC03g40250D	ammonium	cytosol	AT3G17820	ATGSKB6_GLN1.3_GLN1;3__glutamine synthetase 1.3	GLN1;3	-0.912487	-0.627958	-0.14245	-0.260424	-0.379003	0.401812	0.00587217	0.106384	0.923323	0.537696	0.363816	0.620932
BnaA05g22420D	ammonium	cytosol	AT3G17820	ATGSKB6_GLN1.3_GLN1;3__glutamine synthetase 1.3	GLN1;3	-0.737397	-0.764095	0.732009	-0.94295	-1.02305	0.452314	0.00654878	0.00933502	0.076998	0.000556404	0.000253757	0.423629
BnaAnng27730D	ammonium	cytosol	AT3G17820	ATGSKB6_GLN1.3_GLN1;3__glutamine synthetase 1.3	GLN1;3	-2.0561	-1.90338	0.389152	-2.14924	-2.04672	0.942518	9.9075e-05	0.000929615	0.865481	7.86061e-05	0.000279246	0.595871
BnaCnng57900D	ammonium	cytosol	AT3G17820	ATGSKB6_GLN1.3_GLN1;3__glutamine synthetase 1.3	GLN1;3	1.7134	0.681037	-0.776536	0.261001	-0.0277191	-0.144862	0.0307848	0.510924	0.789756	0.837895	1	1
BnaA02g03140D	ammonium	cytosol	AT5G16570	GLN1;4__glutamine synthetase 1;4	GLN1;4	-1.83329	0.0456737	-0.503566	-1.53617	0.546392	0.265884	1.17792e-05	0.9626	0.558744	0.000358675	0.286817	0.840701
BnaC02g06690D	ammonium	cytosol	AT5G16570	GLN1;4__glutamine synthetase 1;4	GLN1;4	-2.99235	-1.58192	-0.990461	-1.57836	0.200034	0.6699	0.0483269	0.383499	0.780002	0.345257	0.946373	0.901544
BnaC09g41340D	ammonium	cytosol	AT5G16570	GLN1;4__glutamine synthetase 1;4	GLN1;4	-3.01263	-2.49942	-0.0265819	-0.776781	-2.4437	-0.266523	0.00129523	0.079078	1	0.544874	0.083743	0.842362
BnaA10g17910D	ammonium	cytosol	AT5G16570	GLN1;4__glutamine synthetase 1;4	GLN1;4	-0.21951	1.54491	-0.330696	0.351924	2.66084	0.103684	0.678679	0.00086909	0.707994	0.506346	8.47399e-10	0.981891
	ammonium	cytosol	AT1G48470	GLN1;5__glutamine synthetase 1;5	GLN1;5
BnaC04g29670D	ammonium	plastid	AT5G35630	ATGSL1_GLN2_GS2__glutamine synthetase 2	GLN2	-1.43293	-0.628013	-0.170279	-1.14937	-0.300083	0.129143	2.28682e-07	0.0525832	0.837295	5.79544e-05	0.404197	0.912122
BnaA08g29950D	ammonium	plastid	AT5G35630	ATGSL1_GLN2_GS2__glutamine synthetase 2	GLN2	-2.29628	-0.729767	-0.247602	-1.77482	-0.529766	0.151952	4.73368e-19	0.0124201	0.664318	8.95908e-12	0.076875	0.861168
BnaA04g07450D	ammonium	plastid	AT5G35630	ATGSL1_GLN2_GS2__glutamine synthetase 2	GLN2	-1.3017	-0.723382	-0.304317	-1.10267	-0.298784	0.165221	1.21674e-05	0.0342076	0.64014	0.000337122	0.441563	0.875089
BnaC08g07930D	ammonium	plastid	AT5G35630	ATGSL1_GLN2_GS2__glutamine synthetase 2	GLN2	-1.69557	-0.35236	-0.141545	-1.6477	-0.541431	0.182726	4.83258e-09	0.366123	0.874313	5.36142e-08	0.125009	0.823932
BnaA03g12250D	ammonium	plastid	AT5G53460	GLT1__NADH-dependent glutamate synthase 1	GLT1	2.30438	1.98865	-0.482736	2.538	2.41378	0.139707	5.34585e-10	3.02915e-07	0.511857	1.45066e-11	2.54848e-10	0.947398
BnaC03g15030D	ammonium	plastid	AT5G53460	GLT1__NADH-dependent glutamate synthase 1	GLT1	2.56228	1.50508	-0.445671	2.32	2.24151	0.170337	4.90896e-05	0.0310829	0.778628	0.000313334	0.000698264	0.978937
BnaC03g15020D	ammonium	plastid	AT5G53460	GLT1__NADH-dependent glutamate synthase 1	GLT1	2.42558	1.51261	0.152814	1.84887	1.77519	0.101854	0.000161008	0.0347122	0.980352	0.0053799	0.00974988	1
BnaCnng10340D	ammonium	plastid	AT5G04140	FD-GOGAT_GLS1_GLU1_GLUS__glutamate synthase 1	GLU1	0.633818	-1.76642	0.553818	-0.356316	-2.01859	0.360252	0.545161	0.0796326	0.811341	0.785458	0.0418552	0.923389
BnaA10g26060D	ammonium	plastid	AT5G04140	FD-GOGAT_GLS1_GLU1_GLUS__glutamate synthase 1	GLU1	-1.34591	-2.09577	-0.827027	-1.01543	-1.85448	-0.440469	0.00295594	7.8529e-06	0.244042	0.0615938	0.000282571	0.687906
BnaA03g19380D	ammonium	plastid	AT2G41220	GLU2__glutamate synthase 2	GLU2	-0.492194	0.660652	-0.138458	-0.462807	1.32894	0.0768468	0.0779902	0.0255902	0.895927	0.117733	6.67773e-07	0.982662
BnaA04g23740D	ammonium	plastid	AT2G41220	GLU2__glutamate synthase 2	GLU2	-0.988292	-0.343584	0.0215373	-1.00254	-0.012361	0.379431	4.50959e-05	0.263433	1	5.15868e-05	0.99743	0.46538
BnaC04g47520D	ammonium	plastid	AT2G41220	GLU2__glutamate synthase 2	GLU2	-1.12996	-0.570972	0.328133	-1.07036	-0.576028	0.478713	7.20138e-05	0.0891722	0.614228	0.000250868	0.0770739	0.4157
BnaC03g23220D	ammonium	plastid	AT2G41220	GLU2__glutamate synthase 2	GLU2	-0.918364	0.373157	0.0546288	-0.555143	1.16722	0.284796	9.14632e-05	0.197757	0.991253	0.029094	1.20694e-06	0.6382
BnaA06g11610D	ammonium	mito	AT1G17290	AlaAT1__alanine aminotransferase 1	ALAAT1	6.66745	3.05709	-0.719341	6.11575	3.9097	0.13641	5.1691e-20	5.99102e-06	0.580127	1.38116e-17	8.33401e-09	0.996846
BnaA09g45030D	ammonium	mito	AT1G17290	AlaAT1__alanine aminotransferase 1	ALAAT1	1.01235	1.13123	0.0947881	1.40194	1.1394	-0.349753	0.000244283	0.00011087	0.950004	6.16848e-07	9.90745e-05	0.622181
BnaC08g37860D	ammonium	mito	AT1G17290	AlaAT1__alanine aminotransferase 1	ALAAT1	-0.265593	-0.375452	-2.31513	0.905919	0.459816	-0.837224	0.733913	0.673817	0.00347051	0.197514	0.576309	0.5387
BnaC08g17310D	ammonium	mito	AT1G17290	AlaAT1__alanine aminotransferase 1	ALAAT1	7.34401	5.48094	-0.0411384	7.39608	6.13564	0.73108	6.22229e-18	2.89817e-11	1	5.96909e-18	1.69036e-13	0.672362
BnaC05g13450D	ammonium	mito	AT1G17290	AlaAT1__alanine aminotransferase 1	ALAAT1	6.11819	3.68284	0.262489	6.25164	4.0438	0.22923	1.65929e-22	5.54181e-10	0.890723	4.48506e-23	1.19136e-11	0.928556
BnaA08g23190D	ammonium	mito	AT1G17290	AlaAT1__alanine aminotransferase 1	ALAAT1	10.2106	9.43727	-0.183624	8.64788	7.94782	-0.111725	6.59788e-25	6.36924e-22	0.980845	4.02082e-20	1.87961e-17	1
BnaCnng13630D	ammonium	mito	AT1G17290	AlaAT1__alanine aminotransferase 1	ALAAT1	-0.336556	0.118981	0.0468528	-0.456424	-0.589124	0.119306	0.4626	0.861605	1	0.363237	0.219	0.966801
	ammonium	mito	AT1G72330	ALAAT2__alanine aminotransferase 2	ALAAT2
BnaC04g41630D	ammonium	mito	AT2G30970	ASP1__aspartate aminotransferase 1	ASP1	-0.131779	-0.0641734	-0.116578	0.0231635	0.0738684	0.078027	0.620082	0.86444	0.873239	0.970158	0.830837	0.952826
BnaC04g54310D	ammonium	mito	AT2G30970	ASP1__aspartate aminotransferase 1	ASP1	-0.468766	-0.86645	-0.463054	0.102339	-1.2405	-0.00276409	0.569834	0.242365	0.705888	0.932888	0.078433	1
BnaA04g28670D	ammonium	mito	AT2G30970	ASP1__aspartate aminotransferase 1	ASP1	-0.85218	-0.907622	-0.0881326	-0.593491	-0.758415	-0.162863	0.00325782	0.00374869	0.960977	0.0633538	0.0173656	0.877399
BnaA10g15590D	ammonium	cytosol	AT5G19550	AAT2_ASP2__aspartate aminotransferase 2	ASP2	3.41599	2.19981	-0.0213383	3.41259	2.05576	-0.422659	2.01463e-24	6.26224e-11	1	3.07916e-24	9.30666e-10	0.586652
BnaA02g04300D	ammonium	cytosol	AT5G19550	AAT2_ASP2__aspartate aminotransferase 2	ASP2	2.30448	2.18803	-0.0419547	5.25232	0.0202313	-3.5849	0.0665235	0.119691	1	0.000166484	1	0.0702847
BnaC02g08820D	ammonium	cytosol	AT5G19550	AAT2_ASP2__aspartate aminotransferase 2	ASP2	1.82094	1.9035	-0.195789	2.85391	3.07798	0.776863	0.0548629	0.0703761	0.988617	0.00330935	0.00221393	0.74101
BnaC09g54080D	ammonium	cytosol	AT5G19550	AAT2_ASP2__aspartate aminotransferase 2	ASP2	3.86491	2.77507	-0.0134813	4.4509	3.57357	0.0390118	2.68284e-21	9.55453e-12	1	1.61238e-26	3.18161e-18	1
BnaA03g03400D	ammonium	plastid	AT5G11520	ASP3_YLS4__aspartate aminotransferase 3	ASP3	1.66297	-0.925654	-0.768013	-0.88161	-0.846237	-1.21032	0.0214515	0.289032	0.607448	0.288713	0.329903	0.371083
BnaC03g04830D	ammonium	plastid	AT5G11520	ASP3_YLS4__aspartate aminotransferase 3	ASP3	-0.901164	-0.465938	0.526822	-1.20116	-0.889635	0.286214	0.142927	0.554735	0.68156	0.0540463	0.187814	0.893909
BnaA09g10660D	ammonium	cytosol	AT1G62800	ASP4__aspartate aminotransferase 4	ASP4	-1.71806	-1.97742	-0.420451	-1.25454	-1.50054	0.218674	0.000148389	3.85729e-05	0.678341	0.00802615	0.00193593	0.902771
BnaA03g54610D	ammonium	cytosol	AT1G62800	ASP4__aspartate aminotransferase 4	ASP4	-2.38863	-1.36521	2.25009	-2.34284	-1.65929	-2.136	4.88434e-10	0.000955492	0.638434	2.53415e-09	3.77551e-05	0.725771
BnaC09g13020D	ammonium	cytosol	AT1G62800	ASP4__aspartate aminotransferase 4	ASP4	-2.17072	-2.02367	0.00122212	-1.48612	-2.98941	-0.0247923	0.000115119	0.000985204	1	0.0125691	2.70091e-07	1
BnaA09g12700D	ammonium	cytosol	AT1G62800	ASP4__aspartate aminotransferase 4	ASP4	0.151888	-0.333036	0.0406157	1.0806	-1.26917	1.74315	0.872589	0.751265	1	0.156081	0.098662	0.653463
BnaCnng72730D	ammonium	cytosol	AT1G62800	ASP4__aspartate aminotransferase 4	ASP4	-2.14802	-0.51745	0.993262	-1.02184	-0.877986	-0.570127	1.46936e-06	0.374005	0.106344	0.019398	0.0765155	0.509151
BnaC04g36800D	ammonium	cytosol	AT1G62800	ASP4__aspartate aminotransferase 4	ASP4	-2.18094	-1.26997	0.238589	-1.96034	-1.27309	-0.179537	0.000250716	0.0599209	0.989447	0.00165414	0.05637	1
BnaC07g43610D	ammonium	plastid	AT4G31990	AAT3_ASP5_ATAAT1__aspartate aminotransferase 5	ASP5	0.306002	0.020251	0.0581654	0.666957	-0.0289625	0.375725	0.217627	0.973469	0.977917	0.00453274	0.956707	0.400613
BnaC07g42600D	ammonium	plastid	AT4G31990	AAT3_ASP5_ATAAT1__aspartate aminotransferase 5	ASP5	0.310528	0.646268	0.571643	0.133485	0.566079	0.385575	0.198251	0.00740419	0.101125	0.661732	0.0186984	0.399924
BnaC01g06460D	ammonium	plastid	AT4G31990	AAT3_ASP5_ATAAT1__aspartate aminotransferase 5	ASP5	-0.0665107	0.973551	1.91674	-0.163727	0.326565	0.897463	0.966963	0.395817	0.163564	0.921748	0.812992	0.696607
BnaA03g51850D	ammonium	plastid	AT4G31990	AAT3_ASP5_ATAAT1__aspartate aminotransferase 5	ASP5	0.945439	0.616768	1.89552	0.616475	0.654306	-0.0883891	0.00595705	0.127527	9.85055e-06	0.104623	0.093	0.991715
BnaA01g04910D	ammonium	plastid	AT4G31990	AAT3_ASP5_ATAAT1__aspartate aminotransferase 5	ASP5	1.09738	0.821099	-0.520097	1.79985	1.6229	0.0338092	8.70449e-07	0.000789533	0.134243	8.10213e-16	9.63121e-13	1
	ammonium	plastid	AT2G22250	AAT_ATAAT_MEE17__aspartate aminotransferase	AAT
BnaA09g13010D	ammonium	cytosol	AT1G62960	ACS10__ACC synthase 10	ACS10	-0.940018	0.245651	0.721063	-1.42979	-0.172772	-0.0156453	0.00284578	0.561111	0.0470035	3.64545e-06	0.693419	1
BnaC09g12920D	ammonium	cytosol	AT1G62960	ACS10__ACC synthase 10	ACS10	-0.0411687	-0.180308	0.240012	-0.409623	-0.415959	0.225263	0.907401	0.601119	0.575694	0.132757	0.154494	0.642854
BnaC02g15560D	ammonium	mito	AT5G51690	ACS12__1-amino-cyclopropane-1-carboxylate synthase 12	ACS12	0.661396	0.290321	0.096844	0.549561	0.587881	0.281651	0.00129478	0.269552	0.889673	0.0106336	0.00845564	0.497501
BnaAnng08090D	ammonium	mito	AT5G51690	ACS12__1-amino-cyclopropane-1-carboxylate synthase 12	ACS12	0.922733	0.920729	-0.217958	-0.146882	-6.51856	-6.88583	0.659736	0.707732	1	1	0.018108	0.0559133
BnaAnng08100D	ammonium	mito	AT5G51690	ACS12__1-amino-cyclopropane-1-carboxylate synthase 12	ACS12	0.141273	-0.106314	-0.00031302	0.329041	-0.0499208	-0.230614	0.800369	0.888052	1	0.602472	0.964923	0.883809
BnaA06g17510D	ammonium	cytosol	AT3G47340	ASN1_AT-ASN1_DIN6__glutamine-dependent asparagine synthase 1	ASN1	7.1051	2.77485	0.583577	4.87366	-0.0201635	-0.0790181	4.2474e-14	0.0014909	0.858753	2.70097e-08	1	1
BnaC03g75390D	ammonium	cytosol	AT3G47340	ASN1_AT-ASN1_DIN6__glutamine-dependent asparagine synthase 1	ASN1	4.8553	1.153	1.80543	2.10526	-0.126027	1.5677	7.78019e-07	0.302111	0.545332	0.0289	0.949352	0.706008
BnaC03g53730D	ammonium	cytosol	AT3G47340	ASN1_AT-ASN1_DIN6__glutamine-dependent asparagine synthase 1	ASN1	0.0372049	1.50461	1.30481	0.40747	0.834031	0.324126	0.974536	0.0175002	0.37695	0.569413	0.201038	0.923299
BnaCnng72260D	ammonium	cytosol	AT3G47340	ASN1_AT-ASN1_DIN6__glutamine-dependent asparagine synthase 1	ASN1	4.41744	0.991097	-0.0289944	1.75196	0.225296	0.0567702	1.51406e-10	0.200518	1	0.0092257	0.823463	1
BnaA06g23950D	ammonium	cytosol	AT5G65010	ASN2__asparagine synthetase 2	ASN2	-0.195028	-1.14596	-1.05555	0.0241265	-0.750041	-0.181502	0.625425	0.00115453	0.0082649	0.988551	0.0484083	0.863252
BnaC03g49300D	ammonium	cytosol	AT5G65010	ASN2__asparagine synthetase 2	ASN2	-1.72949	-0.290743	-1.14803	-1.13885	-0.595073	-0.221989	2.42029e-06	0.595027	0.01242	0.00363638	0.201629	0.844199
BnaC03g04190D	ammonium	cytosol	AT5G10240	ASN3__asparagine synthetase 3	ASN3	-0.532875	-0.312819	-0.251834	-1.07222	-0.246007	-0.333235	0.576083	0.806384	0.95479	0.258812	0.855143	0.935936
BnaA03g02840D	ammonium	cytosol	AT5G10240	ASN3__asparagine synthetase 3	ASN3	-0.867666	-0.913371	-0.9891	-0.905765	-1.01297	-1.18625	0.020642	0.0258885	0.0544701	0.0192942	0.0103012	0.0192464
BnaC09g40620D	ammonium	cytosol	AT5G17330	GAD_GAD1__glutamate decarboxylase	GAD1	-0.502431	-0.545419	-0.0105091	-0.323492	-0.367877	-1.43464	0.024538	0.0241618	1	0.196862	0.145826	0.302055
BnaC03g08350D	ammonium	cytosol	AT5G17330	GAD_GAD1__glutamate decarboxylase	GAD1	0.982589	0.0336962	-2.5371	1.36532	0.611153	0.735006	0.00079284	0.959354	0.223958	4.09222e-06	0.0614202	0.877509
BnaA03g06520D	ammonium	cytosol	AT5G17330	GAD_GAD1__glutamate decarboxylase	GAD1	1.62785	0.275652	-0.36587	1.75355	1.01386	-0.986776	7.84455e-07	0.554329	0.845797	1.70188e-07	0.00456455	0.625437
BnaA03g06540D	ammonium	cytosol	AT5G17330	GAD_GAD1__glutamate decarboxylase	GAD1	1.22634	0.102634	0.0205232	1.12257	0.269459	0.328615	0.0761736	0.933501	1	0.221987	0.780964	1
BnaA03g06510D	ammonium	cytosol	AT5G17330	GAD_GAD1__glutamate decarboxylase	GAD1	1.79733	0.472665	-2.26931	2.39878	0.760597	-0.00222672	3.43854e-05	0.388007	0.638434	2.50962e-07	0.123939	1
BnaAnng27540D	ammonium	cytosol	AT5G17330	GAD_GAD1__glutamate decarboxylase	GAD1	-0.818342	-0.928266	-1.69324	-0.612012	-0.871135	-1.33248	0.00244231	0.00122879	0.308996	0.0338157	0.00214413	0.447479
BnaC06g27330D	ammonium	cytosol	AT1G65960	GAD2__glutamate decarboxylase 2	GAD2	0.731225	1.40046	-0.751042	0.876171	1.11684	-0.32696	0.0679269	0.000639784	0.227336	0.0319233	0.00657893	0.746394
BnaA07g25530D	ammonium	cytosol	AT1G65960	GAD2__glutamate decarboxylase 2	GAD2	-0.975429	0.608296	-0.187222	-0.789402	0.32976	0.799454	0.0354054	0.277616	0.920724	0.113359	0.586066	0.343962
	ammonium	cytosol	AT2G02000	GAD3__glutamate decarboxylase 3	GAD3
BnaC02g34260D	ammonium	cytosol	AT2G02010	GAD4__glutamate decarboxylase 4	GAD4	6.48535	3.87669	-2.52805	6.55713	3.48055	-4.84446	8.50097e-08	0.000927463	0.318363	5.6543e-08	0.00232626	0.179932
BnaC09g52280D	ammonium	cytosol	AT2G02010	GAD4__glutamate decarboxylase 4	GAD4	2.14733	0.231656	3.1791	4.32482	1.44016	2.4958	0.00980648	0.858841	0.442695	3.0232e-07	0.117737	0.631627
BnaA02g26140D	ammonium	cytosol	AT2G02010	GAD4__glutamate decarboxylase 4	GAD4	1.4016	-0.564667	-3.32581	3.10228	-0.34117	-1.61909	0.258027	0.740307	0.101572	0.0124545	0.847785	0.58187
BnaA09g18890D	ammonium	cytosol	AT2G02010	GAD4__glutamate decarboxylase 4	GAD4	4.83584	2.43837	0.0496364	4.93662	2.85352	1.25053	1.99199e-09	0.00341921	1	1.13801e-09	0.000549665	0.811844
	ammonium	cytosol	AT3G17720	Pyridoxal phosphate (PLP)-dependent transferases superfamily protein	GADx
BnaA01g27830D	ammonium	cytosol	AT3G17760	GAD5__glutamate decarboxylase 5	GAD5	0.946803	1.39816	1.38799	-0.233455	-0.392451	0.0239901	0.0269362	0.00263298	0.208154	0.69783	0.492322	1
BnaA10g16660D	ammonium	mito	AT5G18170	GDH1__glutamate dehydrogenase 1	GDH1	-0.996408	-1.02141	0.481986	-0.942138	-1.98905	0.336797	0.0178267	0.0267826	0.597977	0.031967	3.28515e-06	0.774451
BnaC09g39680D	ammonium	mito	AT5G18170	GDH1__glutamate dehydrogenase 1	GDH1	-0.845058	-1.01706	0.634276	-0.62756	-1.73811	0.392429	0.0198618	0.00890813	0.326527	0.11097	1.88745e-06	0.673528
BnaC09g47860D	ammonium	mito	AT5G07440	GDH2__glutamate dehydrogenase 2	GDH2	-0.0948566	-0.368108	0.346233	-0.298958	-0.462963	-0.145795	0.803363	0.314347	0.605481	0.388791	0.17175	0.916413
BnaA10g23880D	ammonium	mito	AT5G07440	GDH2__glutamate dehydrogenase 2	GDH2	0.0793595	-0.394912	0.0595288	-0.297918	-0.526749	-0.517212	0.863991	0.35348	1	0.507713	0.244584	0.634445
BnaC02g01610D	ammonium	mito	AT5G07440	GDH2__glutamate dehydrogenase 2	GDH2	2.95598	0.123019	0.302194	1.37448	-0.600569	1.59158	0.00117028	0.945875	0.949613	0.162787	0.610387	0.387584
BnaC03g03050D	ammonium	mito	AT5G07440	GDH2__glutamate dehydrogenase 2	GDH2	-0.372711	-3.21182	1.71553	-1.01663	-2.77194	1.6801	0.549657	8.7153e-09	0.0143006	0.104305	2.04171e-06	0.0185519
BnaC05g31580D	ammonium	mito	AT5G07440	GDH2__glutamate dehydrogenase 2	GDH2	-0.170984	0.110147	0.625188	-0.504482	-0.294447	0.287657	0.618093	0.808941	0.111676	0.115053	0.414477	0.659479
BnaC09g03800D	ammonium	mito	AT5G07440	GDH2__glutamate dehydrogenase 2	GDH2	1.26927	0.51596	1.12039	0.929125	-1.13214	-0.445088	0.00975983	0.431614	0.180618	0.0791057	0.0364002	0.752325
BnaA03g02040D	ammonium	mito	AT5G07440	GDH2__glutamate dehydrogenase 2	GDH2	2.9094	-0.644398	-0.286794	1.6958	-1.6489	-0.129349	3.22859e-08	0.326053	0.873622	0.00167624	0.00285809	0.991525
BnaAnng13720D	ammonium	mito	AT5G07440	GDH2__glutamate dehydrogenase 2	GDH2	3.68319	1.04834	-0.315137	0.849329	-2.15841	-0.345572	6.28431e-06	0.276522	0.930238	0.357034	0.0101979	0.922097
	ammonium	mito	AT3G03910	GDH3__glutamate dehydrogenase 3	GDH3
BnaA06g02140D	ammonium	cytosol	AT1G51720	Amino acid dehydrogenase family protein	GDH4	-0.296294	-0.343649	-0.0129072	-0.384851	-0.232389	-0.0320127	0.19235	0.169482	1	0.0974022	0.377782	1
BnaC03g77940D	ammonium	cytosol	AT1G51720	Amino acid dehydrogenase family protein	GDH4	-0.0722852	-0.157292	-0.014549	-0.0169748	-0.293294	0.150232	0.769256	0.545276	1	0.979377	0.186681	0.78851
BnaC06g04780D	ammonium	cytosol	AT1G51720	Amino acid dehydrogenase family protein	GDH4	0.505083	0.348027	0.685839	-0.152135	0.217114	-0.0252465	0.0369105	0.238127	0.0692506	0.635441	0.484367	1
BnaA01g26440D	ammonium	cytosol	AT1G51720	Amino acid dehydrogenase family protein	GDH4	0.399781	0.0223471	0.134211	0.160113	0.144447	0.0548098	0.176184	0.976621	0.89348	0.666712	0.724567	1
BnaA08g01810D	ammonium	cytosol	AT1G51720	Amino acid dehydrogenase family protein	GDH4	0.561898	0.16005	0.121371	0.245747	0.00996238	-0.0266968	0.00530741	0.575686	0.84241	0.308985	0.998165	1
BnaA01g24820D	ammonium	mito	AT3G22200	GABA-T_HER1_POP2__Pyridoxal phosphate (PLP)-dependent transferases superfamily protein	GABA-T	-0.852797	-1.06991	1.34805	-2.04448	-1.52112	1.23727	0.103279	0.0586284	0.0574096	5.08885e-05	0.00415992	0.121083
BnaC02g40020D	ammonium	mito	AT3G22200	GABA-T_HER1_POP2__Pyridoxal phosphate (PLP)-dependent transferases superfamily protein	GABA-T	-0.259313	-0.263748	0.204997	-0.0351997	-0.529501	-1.53365	0.643092	0.701021	0.908897	0.987632	0.365245	0.0637494
BnaC03g46060D	ammonium	mito	AT3G22200	GABA-T_HER1_POP2__Pyridoxal phosphate (PLP)-dependent transferases superfamily protein	GABA-T	-1.08757	-0.0928153	0.983118	-1.79002	-4.7442	-6.26112	0.395378	0.972317	0.701924	0.423505	0.0209481	0.0420931
BnaC05g30410D	ammonium	mito	AT3G22200	GABA-T_HER1_POP2__Pyridoxal phosphate (PLP)-dependent transferases superfamily protein	GABA-T	-1.89185	-1.87565	0.920773	-2.13065	-2.2352	0.47919	1.29279e-10	2.62088e-09	0.0328215	6.15425e-13	4.17188e-13	0.45411
BnaCnng33690D	ammonium	mito	AT3G22200	GABA-T_HER1_POP2__Pyridoxal phosphate (PLP)-dependent transferases superfamily protein	GABA-T	0.482489	-0.63846	1.33515	-0.968738	-1.45343	1.24113	0.464398	0.383309	0.115855	0.124044	0.0189508	0.190414
BnaA05g17430D	ammonium	mito	AT3G22200	GABA-T_HER1_POP2__Pyridoxal phosphate (PLP)-dependent transferases superfamily protein	GABA-T	-0.980554	-1.41363	2.18977	-1.22106	-1.75502	0.247734	0.0699677	0.0145432	0.00395278	0.0315401	0.00232482	0.94305
BnaA07g34930D	ammonium	mito	AT1G79440	ALDH5F1_ENF1_SSADH_SSADH1__aldehyde dehydrogenase 5F1	SSADH	-0.291481	0.439086	1.17569	-0.3195	0.664496	0.135957	0.303803	0.161757	0.000300771	0.288207	0.0191612	0.888563
BnaC06g39860D	ammonium	mito	AT1G79440	ALDH5F1_ENF1_SSADH_SSADH1__aldehyde dehydrogenase 5F1	SSADH	-0.185476	0.461583	0.521427	-0.10686	0.511585	0.248697	0.496587	0.0932424	0.1446	0.750728	0.0501328	0.664127
BnaA02g36110D	ammonium	mito	AT1G79440	ALDH5F1_ENF1_SSADH_SSADH1__aldehyde dehydrogenase 5F1	SSADH	0.248022	0.657116	-0.0124367	-0.237173	0.544217	1.12116	0.606117	0.161516	1	0.655824	0.243769	0.143022
	ammonium	cytosol	AT3G25530	ATGHBDH_GHBDH_GLYR1_GR1__glyoxylate reductase 1	GHBDH,GR1
BnaA06g11890D	ammonium	plastid	AT1G17650	GLYR2_GR2__glyoxylate reductase 2	GR2	-1.51244	-1.12169	-0.338004	-1.13821	-1.31246	0.579643	0.00694282	0.0794686	0.814796	0.0625049	0.0426523	0.638567
BnaC05g13730D	ammonium	plastid	AT1G17650	GLYR2_GR2__glyoxylate reductase 2	GR2	-0.518489	-0.0429176	-0.350816	-0.0976174	-0.813944	-0.37534	0.162276	0.958326	0.607352	0.879388	0.0580887	0.617007
BnaA02g27130D	ammonium	cytosol	AT2G01170	BAT1__bidirectional amino acid transporter 1	GABA-P	-1.28446	-1.02548	0.205476	-1.33409	-0.554003	1.11375	0.0131625	0.0825102	0.941436	0.0133241	0.386858	0.288285
BnaA06g34530D	ammonium	cytosol	AT2G01170	BAT1__bidirectional amino acid transporter 1	GABA-P	0.501513	0.516243	0.325602	1.27276	1.08247	-0.299035	0.262346	0.324621	0.793493	0.00203803	0.0126129	0.823407
BnaC07g48770D	ammonium	cytosol	AT2G01170	BAT1__bidirectional amino acid transporter 1	GABA-P	-0.634898	0.211156	-0.0402714	-0.540847	-0.0544631	-0.0398877	0.103856	0.707167	1	0.202002	0.945741	1
BnaC02g33700D	ammonium	cytosol	AT2G01170	BAT1__bidirectional amino acid transporter 1	GABA-P	-0.691924	-0.688896	-2.21448	-1.5108	-0.953107	0.336973	0.0678225	0.0966212	0.00424542	6.40846e-05	0.00985592	0.725771
BnaA06g35110D	ammonium	cytosol	AT2G01170	BAT1__bidirectional amino acid transporter 1	GABA-P	-0.6217	-0.245397	-4.01428	-0.415845	0.0435077	1.7253	0.140707	0.678251	0.196186	0.394364	0.966741	0.511916
BnaC08g02490D	ammonium	cytosol	AT1G08230	ATGAT1_GAT1__Transmembrane amino acid transporter family protein	GAT1	1.37449	0.34479	1.48336	1.05708	0.163603	0.499091	0.000648341	0.526863	0.0830847	0.0122951	0.78825	0.690679
BnaA08g27070D	ammonium	cytosol	AT1G08230	ATGAT1_GAT1__Transmembrane amino acid transporter family protein	GAT1	0.741287	0.278407	0.470391	0.318419	0.0652077	0.909165	0.0197693	0.506608	0.530909	0.404352	0.909696	0.0700239

## Sheet: PP cycle
ID	pathway	localization	AGI	annotation	Name	logFC.Root_H4h_AV	logFC.Root_H24h_AV	logFC.Leaf_H24h_AV	logFC.Root_H4h_ZS	logFC.Root_H24h_ZS	logFC.Leaf_H24h_ZS	FDR.Root_H4h_AV	FDR.Root_H24h_AV	FDR.Leaf_H24h_AV	FDR.Root_H4h_ZS	FDR.Root_H24h_ZS	FDR.Leaf_H24h_ZS
BnaA08g30000D	PP cycle	plastid	AT5G35790	G6PD1__glucose-6-phosphate dehydrogenase 1	G6PD1	2.44732	-1.64882	0.212582	-0.00030204	-0.00026809	-0.0354696	0.132842	0.442383	0.728551	1	1	1
BnaCnng48180D	PP cycle	plastid	AT5G35790	G6PD1__glucose-6-phosphate dehydrogenase 1	G6PD1	2.13036	-1.58624	0.143995	2.88384	0.643226	-0.0121014	0.0464851	0.361887	0.872263	0.00540543	0.613604	1
BnaCnng78750D	PP cycle	plastid	AT5G35790	G6PD1__glucose-6-phosphate dehydrogenase 1	G6PD1	0.116214	0.0393463	0.198994	-0.191317	0.708102	-0.0442067	0.925165	1	0.786297	0.906822	0.439256	1
BnaC09g43980D	PP cycle	plastid	AT5G13110	G6PD2__glucose-6-phosphate dehydrogenase 2	G6PD2	-0.189485	-0.528298	1.36727	-0.103139	-0.399706	-1.44287	0.663093	0.218599	0.428043	0.856462	0.366696	0.207315
BnaC03g05780D	PP cycle	plastid	AT5G13110	G6PD2__glucose-6-phosphate dehydrogenase 2	G6PD2	-1.52326	-0.915818	0.00973228	-1.04067	-0.727767	-0.310293	0.00231562	0.115545	1	0.052472	0.215506	0.8442
BnaA10g20180D	PP cycle	plastid	AT5G13110	G6PD2__glucose-6-phosphate dehydrogenase 2	G6PD2	0.275903	-0.427672	1.21426	0.174578	-0.333943	0.719572	0.565441	0.410753	0.0301532	0.765608	0.52099	0.380554
BnaA03g04190D	PP cycle	plastid	AT5G13110	G6PD2__glucose-6-phosphate dehydrogenase 2	G6PD2	0.204715	-0.613602	-0.184721	-0.856959	-1.0852	0.396755	0.858971	0.597391	0.98792	0.386594	0.271627	0.914889
BnaAnng27690D	PP cycle	plastid	AT1G24280	G6PD3__glucose-6-phosphate dehydrogenase 3	G6PD3	-0.758203	-1.21059	-1.29596	0.167581	-1.03669	-0.0844829	0.0220826	0.000247224	0.204683	0.705288	0.00146671	1
BnaA08g31100D	PP cycle	plastid	AT1G24280	G6PD3__glucose-6-phosphate dehydrogenase 3	G6PD3	-1.80383	-1.36918	-0.635749	-0.0142041	-1.65271	0.0714217	9.98638e-05	0.00691324	0.821072	1	0.000829876	1
BnaC07g11270D	PP cycle	plastid	AT1G24280	G6PD3__glucose-6-phosphate dehydrogenase 3	G6PD3	-1.82874	-1.4902	-0.652164	-0.969119	-1.26336	-0.201991	2.21607e-09	3.75286e-06	0.188578	0.00263049	9.28906e-05	0.840022
BnaA07g08970D	PP cycle	plastid	AT1G24280	G6PD3__glucose-6-phosphate dehydrogenase 3	G6PD3	-1.98934	-1.46724	-0.664612	-1.04054	-1.13779	0.0984507	1.449e-10	7.5857e-06	0.186238	0.00137917	0.000596628	0.971173
BnaCnng06870D	PP cycle	plastid	AT1G09420	G6PD4__glucose-6-phosphate dehydrogenase 4	G6PD4	0.0233682	0.206341	0.996736	0.322446	0.34023	0.346495	0.974683	0.698855	0.0414195	0.482114	0.467676	0.726509
BnaA08g26430D	PP cycle	plastid	AT1G09420	G6PD4__glucose-6-phosphate dehydrogenase 4	G6PD4	0.0901931	0.142934	0.303702	0.384657	0.0427459	0.650778	0.85639	0.8111	0.714671	0.35895	0.960048	0.371772
BnaC07g24170D	PP cycle	cytosol	AT3G27300	G6PD5__glucose-6-phosphate dehydrogenase 5	G6PD5	-0.13924	-0.537789	0.858726	0.656483	-0.846144	0.400988	0.777054	0.259358	0.383666	0.104207	0.0373045	0.770954
BnaC09g01420D	PP cycle	cytosol	AT3G27300	G6PD5__glucose-6-phosphate dehydrogenase 5	G6PD5	-0.768879	-1.21384	-0.0460487	-0.767315	-1.49222	-0.109598	0.0187286	0.000321905	1	0.0239591	5.18808e-06	0.971046
BnaA09g01980D	PP cycle	cytosol	AT3G27300	G6PD5__glucose-6-phosphate dehydrogenase 5	G6PD5	0.364414	-0.327003	0.684218	0.264696	0.138431	-0.734755	0.47274	0.590816	0.400322	0.64867	0.842619	0.406669
BnaA06g32220D	PP cycle	cytosol	AT3G27300	G6PD5__glucose-6-phosphate dehydrogenase 5	G6PD5	-1.33333	-1.91486	0.110987	-0.106859	-3.05251	0.232381	0.014912	0.00135275	1	0.911981	7.14373e-08	0.972002
BnaC06g13190D	PP cycle	cytosol	AT5G40760	G6PD6__glucose-6-phosphate dehydrogenase 6	G6PD6	-0.102927	0.126366	-0.172108	-0.137816	0.194694	-0.0185838	0.73678	0.724711	0.792206	0.67103	0.529399	1
BnaA07g15160D	PP cycle	cytosol	AT5G40760	G6PD6__glucose-6-phosphate dehydrogenase 6	G6PD6	-1.06028	-0.155211	0.341425	-0.481387	0.384458	-0.584231	0.00224771	0.775136	0.68003	0.226428	0.372585	0.41078
BnaA09g46150D	PP cycle	plastid	AT1G13700	PGL1__6-phosphogluconolactonase 1	PGL1	0.416343	-1.18646	0.648107	-0.31502	-0.865833	0.421334	0.337347	0.0231053	0.271141	0.54367	0.106472	0.615916
BnaAnng18330D	PP cycle	plastid	AT1G13700	PGL1__6-phosphogluconolactonase 1	PGL1	-1.78458	-0.689637	-0.198611	-1.07337	-1.14185	-0.0131773	1.47218e-05	0.284181	0.875245	0.0994034	0.0477007	1
BnaA01g20810D	PP cycle	plastid	AT3G49360	PGL2__6-phosphogluconolactonase 2	PGL2	-0.27585	-0.668383	0.224888	-0.625618	-1.18788	0.497961	0.643588	0.26895	0.898309	0.301163	0.0388665	0.699001
BnaA09g04900D	PP cycle	plastid	AT5G24400	EMB2024_PGL3__NagB/RpiA/CoA transferase-like superfamily protein	PGL3	-0.894505	-0.91196	2.22436	0.871509	0.921481	0.615261	0.403869	0.534	0.399585	0.226723	0.216381	0.754731
BnaC07g49660D	PP cycle	plastid	AT5G24400	EMB2024_PGL3__NagB/RpiA/CoA transferase-like superfamily protein	PGL3	0.0682214	0.102156	0.338726	-0.0490886	0.137136	0.380407	0.80038	0.740709	0.374549	0.887801	0.617841	0.32665
BnaC09g04440D	PP cycle	plastid	AT5G24400	EMB2024_PGL3__NagB/RpiA/CoA transferase-like superfamily protein	PGL3	0.062837	-0.189675	-0.0978286	0.149121	-0.0104471	0.117998	0.800361	0.443775	0.902038	0.530268	0.994136	0.865553
BnaA06g26920D	PP cycle	plastid	AT5G24400	EMB2024_PGL3__NagB/RpiA/CoA transferase-like superfamily protein	PGL3	-0.208995	0.097853	0.101219	-0.078793	0.287797	0.241332	0.422966	0.786096	0.911918	0.823402	0.297047	0.673528
BnaC07g49670D	PP cycle	plastid	AT5G24410	PGL4__6-phosphogluconolactonase 4	PGL4	1.08573	-1.81805	-3.924	-0.295878	-1.89987	-0.0245331	0.0843886	0.00488148	0.227713	0.722274	0.00280813	1
BnaA06g39320D	PP cycle	plastid	AT5G24410	PGL4__6-phosphogluconolactonase 4	PGL4	0.540524	-1.24941	-0.859921	0.636297	-1.79125	-0.464668	0.191553	0.00200718	0.880029	0.131497	3.71757e-06	0.981934
BnaC07g30010D	PP cycle	plastid	AT5G24420	PGL5__6-phosphogluconolactonase 5	PGL5	-0.24826	-1.17989	0.798778	-2.39458	0.98909	-0.134488	0.708694	0.0545278	0.3689	0.237684	0.644742	0.984415
BnaA06g39290D	PP cycle	plastid	AT5G24420	PGL5__6-phosphogluconolactonase 5	PGL5	-1.89801	-0.266319	0.912897	-5.12164	-2.93697	-0.233468	0.0666197	0.904702	0.583135	0.00191319	0.00272886	0.972729
BnaA04g11280D	PP cycle	plastid	AT5G41670	6-phosphogluconate dehydrogenase family protein	6PGD	-1.6173	-0.893574	-0.22542	-1.31338	-1.20657	-0.845399	2.18307e-06	0.0203759	0.825201	0.00021125	0.000976774	0.165704
BnaCnng11100D	PP cycle	plastid	AT5G41670	6-phosphogluconate dehydrogenase family protein	6PGD	-1.99746	-1.18996	-0.566734	-1.34582	-1.23709	-0.702729	5.33642e-09	0.00142055	0.3666	0.000133372	0.000688727	0.25844
BnaA07g15420D	PP cycle	plastid	AT5G41670	6-phosphogluconate dehydrogenase family protein	6PGD	-0.0242224	0.784759	0.00915136	-1.12489	-0.813226	1.20858	1	0.731586	1	0.154803	0.316579	0.804114
BnaA01g33010D	PP cycle	plastid	AT3G02360	6-phosphogluconate dehydrogenase family protein	6PGD	-0.17736	-0.443635	0.00948802	-0.205738	-0.343266	0.184948	0.571179	0.150794	1	0.53677	0.27493	0.811654
BnaA05g33580D	PP cycle	plastid	AT3G02360	6-phosphogluconate dehydrogenase family protein	6PGD	-0.597728	-0.423668	0.0418423	-0.471485	-0.309682	0.127597	0.0594786	0.26125	1	0.172403	0.422376	0.929721
BnaC05g48310D	PP cycle	plastid	AT3G02360	6-phosphogluconate dehydrogenase family protein	6PGD	-0.67693	-0.214309	0.0937041	-0.35456	-0.342103	0.0931162	0.0205773	0.596146	0.952587	0.329792	0.361435	0.978768
BnaA09g11480D	PP cycle	plastid	AT1G64190	6-phosphogluconate dehydrogenase family protein	6PGD	-0.112166	0.231429	1.35024	-0.290242	0.0273793	0.0214417	0.880141	0.780582	0.174558	0.687113	0.996383	1
BnaC09g11930D	PP cycle	plastid	AT1G64190	6-phosphogluconate dehydrogenase family protein	6PGD	-1.34764	-1.43572	-0.17603	-1.29681	-1.31645	-0.140289	4.56427e-08	2.05912e-08	0.801504	2.38655e-07	2.79687e-07	0.877774
BnaC08g03060D	PP cycle	plastid	AT1G64190	6-phosphogluconate dehydrogenase family protein	6PGD	-0.926745	0.0126053	0.102324	-0.673982	-1.02512	-0.0605982	0.11336	1	1	0.334512	0.120173	1
BnaC01g01070D	PP cycle	plastid	AT1G64190	6-phosphogluconate dehydrogenase family protein	6PGD	-0.380846	0.170219	0.655971	-0.537542	-0.210224	0.260189	0.23486	0.698728	0.184381	0.099931	0.600104	0.754952
BnaA09g11470D	PP cycle	plastid	AT1G64190	6-phosphogluconate dehydrogenase family protein	6PGD	-0.594336	-0.162266	1.0879	-0.941515	-0.76137	-1.10637	0.251971	0.840261	0.249593	0.0697737	0.183019	0.306626
BnaC06g01480D	PP cycle	mito	AT4G29120	6-phosphogluconate dehydrogenase family protein	6PGD	0.630742	0.421192	0.0171356	0.409274	0.175962	0.0316838	0.00156363	0.0689152	1	0.0617078	0.503478	1
BnaA06g04150D	PP cycle	mito	AT4G29120	6-phosphogluconate dehydrogenase family protein	6PGD	1.4048	1.52281	0.00659641	1.35578	1.27098	-0.0145432	8.79291e-07	3.31325e-07	1	3.59432e-06	2.48923e-05	1
	PP cycle	cytosol	AT1G71170	6-phosphogluconate dehydrogenase family protein	6PGD
BnaA02g35580D	PP cycle	cytosol	AT1G71180	6-phosphogluconate dehydrogenase family protein	6PGD	-0.0681806	0.0631917	0.0839546	-0.168247	-0.420443	-1.03359	0.889503	0.922856	0.980066	0.733071	0.320414	0.0477606
BnaA03g40170D	PP cycle	plastid	AT5G61410	EMB2728_RPE__D-ribulose-5-phosphate-3-epimerase	RPE	-0.353477	-0.172133	-0.10389	-0.213343	0.00534928	0.1604	0.186748	0.635933	0.904475	0.485001	1	0.817147
BnaAnng38360D	PP cycle	plastid	AT5G61410	EMB2728_RPE__D-ribulose-5-phosphate-3-epimerase	RPE	-0.303083	0.147926	0.420052	-2.41254	0.0009393	0.167495	0.464269	0.799887	0.436756	0.229316	1	0.876049
BnaCnng43240D	PP cycle	plastid	AT5G61410	EMB2728_RPE__D-ribulose-5-phosphate-3-epimerase	RPE	0.475142	0.193332	-0.234653	0.521748	-0.0142123	0.204807	0.0739526	0.597169	0.648556	0.0600591	0.994945	0.741709
BnaA10g23990D	PP cycle	plastid	AT5G61410	EMB2728_RPE__D-ribulose-5-phosphate-3-epimerase	RPE	-0.24933	0.00604289	0.0365991	-0.0325102	0.317717	0.430359	0.555624	1	1	0.978475	0.49767	0.580008
BnaC09g48610D	PP cycle	plastid	AT5G61410	EMB2728_RPE__D-ribulose-5-phosphate-3-epimerase	RPE	-0.0954629	-0.0549801	0.0638196	-0.389818	-0.257086	0.0659706	0.740822	0.89407	0.963399	0.121712	0.372669	0.969865
BnaCnng14770D	PP cycle	cytosol	AT3G01850	Aldolase-type TIM barrel family protein	RPE	0.2868	0.150957	-0.0494857	0.300306	0.216895	0.114815	0.261385	0.653166	0.996977	0.267908	0.464638	0.910285
BnaA09g10900D	PP cycle	cytosol	AT1G63290	Aldolase-type TIM barrel family protein	RPE	0.0641314	0.0402386	0.277506	0.136984	0.556292	0.857314	0.939361	0.978528	0.872566	0.875814	0.397238	0.408377
BnaC01g39900D	PP cycle	plastid	AT3G04790	EMB3119__Ribose 5-phosphate isomerase, type A protein	RPI3	-0.693819	-1.62545	-0.955794	-0.504261	-1.79485	-3.0563	0.596656	0.232094	0.674041	0.762979	0.187299	0.0588915
BnaC05g47040D	PP cycle	plastid	AT3G04790	EMB3119__Ribose 5-phosphate isomerase, type A protein	RPI3	-1.81877	-1.35686	-0.223998	-1.48584	-0.481537	0.36252	6.73162e-05	0.00609891	0.853388	0.000751799	0.353462	0.725013
BnaA01g33410D	PP cycle	plastid	AT3G04790	EMB3119__Ribose 5-phosphate isomerase, type A protein	RPI3	-0.32435	0.050978	-0.501414	-0.220154	0.371109	0.496705	0.769081	0.986129	0.840188	0.876845	0.771141	0.861322
BnaAnng10640D	PP cycle	plastid	AT3G04790	EMB3119__Ribose 5-phosphate isomerase, type A protein	RPI3	-1.45058	-0.427809	-0.203978	-1.40269	-0.108723	0.0112684	5.6411e-06	0.274924	0.798804	6.2443e-05	0.837549	1
BnaAnng10100D	PP cycle	plastid	AT5G44520	NagB/RpiA/CoA transferase-like superfamily protein	RPI4	0.149366	-0.380643	-0.188329	0.346318	-0.955652	-0.0531695	0.751203	0.477862	0.811761	0.444861	0.0225843	1
BnaC07g18020D	PP cycle	plastid	AT5G44520	NagB/RpiA/CoA transferase-like superfamily protein	RPI4	1.26276	0.0453992	-0.263245	0.994994	0.331174	-0.0662131	8.53593e-06	0.950793	0.571673	0.000419654	0.427078	0.974288
BnaA02g15350D	PP cycle	cytosol	AT1G71100	RSW10__Ribose 5-phosphate isomerase, type A protein	RPI1	-1.14651	-1.10221	0.565021	-0.474109	-0.566299	-0.603766	0.0114472	0.028473	0.562349	0.379961	0.300263	0.563637
BnaC02g20560D	PP cycle	cytosol	AT1G71100	RSW10__Ribose 5-phosphate isomerase, type A protein	RPI1	-1.09946	-1.46848	-0.7865	-0.78533	-1.39894	0.216882	0.0232362	0.00478652	0.435155	0.135289	0.00544428	0.91395
BnaA06g35020D	PP cycle	cytosol	AT2G01290	RPI2__ribose-5-phosphate isomerase 2	RPI2	-1.4939	-1.82697	-0.839881	0.0343972	0.0131553	0.0717687	0.156823	0.10755	0.462164	1	1	1
BnaA02g27010D	PP cycle	cytosol	AT2G01290	RPI2__ribose-5-phosphate isomerase 2	RPI2	-1.52616	-1.07642	-0.239434	-1.7524	-0.915702	0.0206334	3.4884e-06	0.00203555	0.745144	2.67469e-07	0.00949687	1
BnaC02g33880D	PP cycle	cytosol	AT2G01290	RPI2__ribose-5-phosphate isomerase 2	RPI2	-1.70274	-1.04504	-0.537046	-1.46759	-0.953602	-0.0521415	8.39095e-07	0.00435286	0.300979	4.89414e-05	0.00902018	1
BnaC07g20680D	PP cycle	cytosol	AT2G01290	RPI2__ribose-5-phosphate isomerase 2	RPI2	-0.395259	-0.995762	-0.328802	-0.347453	-0.539779	0.251415	0.448926	0.0574358	0.899197	0.553158	0.33216	0.912038
BnaC06g42640D	PP cycle	plastid	AT3G55800	SBPASE__sedoheptulose-bisphosphatase	SBPase	1.62407	-1.6467	0.13543	0.0167736	0.00678978	0.819085	0.331472	0.443517	0.994687	1	1	0.720015
BnaA07g16660D	PP cycle	plastid	AT3G55800	SBPASE__sedoheptulose-bisphosphatase	SBPase	0.34643	-0.164926	-0.699954	-1.78077	-0.726398	-0.0156037	0.725858	0.930493	0.49252	0.273054	0.694654	1
BnaA09g35380D	PP cycle	plastid	AT3G55800	SBPASE__sedoheptulose-bisphosphatase	SBPase	0.942645	0.136993	-0.290888	-1.42155	-0.348794	0.0636422	0.146208	0.920016	0.731806	0.0717424	0.708181	1
BnaC06g42630D	PP cycle	plastid	AT3G55800	SBPASE__sedoheptulose-bisphosphatase	SBPase	0.00926432	-0.00841471	-0.179821	-0.00302517	-0.00176898	-0.337293	1	1	0.971621	1	1	0.890013
BnaC08g26740D	PP cycle	plastid	AT3G55800	SBPASE__sedoheptulose-bisphosphatase	SBPase	1.39572	0.167105	-0.246022	-0.0844731	0.638068	0.0530602	0.0493807	0.904152	0.851565	0.968702	0.51488	1
BnaC06g42620D	PP cycle	plastid	AT3G55800	SBPASE__sedoheptulose-bisphosphatase	SBPase	0.0327455	-0.0294337	0.569101	-0.0140857	-0.00773892	-0.383584	1	1	0.644975	1	1	0.826064
BnaA04g03360D	PP cycle	plastid	AT3G55800	SBPASE__sedoheptulose-bisphosphatase	SBPase	1.33913	0.414735	-0.239634	1.22044	0.604198	0.124396	0.289164	0.824723	0.675327	0.397989	0.606242	0.901544
BnaC04g25260D	PP cycle	plastid	AT3G55800	SBPASE__sedoheptulose-bisphosphatase	SBPase	1.48924	1.62099	-0.311309	0.745514	-1.01689	0.0291627	0.154973	0.104144	0.583305	0.665991	0.430363	1
BnaC03g07200D	PP cycle	plastid	AT5G13420	Aldolase-type TIM barrel family protein	TA	0.369629	0.295915	0.445136	-0.29363	0.116736	0.319878	0.610918	0.746962	0.76527	0.728923	0.917789	0.878737
BnaC02g04730D	PP cycle	plastid	AT5G13420	Aldolase-type TIM barrel family protein	TA	-1.05597	-1.33433	0.843972	-1.00265	0.0239351	0.19931	0.0637368	0.0296746	0.560663	0.0947373	0.999263	0.984956
BnaA03g04310D	PP cycle	plastid	AT5G13420	Aldolase-type TIM barrel family protein	TA	0.282036	-0.31652	0.283856	0.935481	0.279944	-0.9672	0.655027	0.668874	0.916959	0.108539	0.702949	0.499975
BnaC03g05850D	PP cycle	plastid	AT5G13420	Aldolase-type TIM barrel family protein	TA	0.767556	-0.4161	-0.930496	0.706406	-1.03405	-1.95777	0.369346	0.711485	0.602678	0.530915	0.309955	0.438539
BnaA10g19920D	PP cycle	plastid	AT5G13420	Aldolase-type TIM barrel family protein	TA	0.164467	0.238552	0.0376323	0.360491	0.279506	-0.300031	0.651758	0.557573	1	0.298704	0.458031	0.706008
BnaA08g02750D	PP cycle	plastid	AT5G13420	Aldolase-type TIM barrel family protein	TA	-1.22964	-1.18244	-5.26218	0.622051	0.523844	-6.69928	0.377406	0.475257	0.0927726	0.712197	0.773324	0.0291887
BnaA02g01610D	PP cycle	plastid	AT5G13420	Aldolase-type TIM barrel family protein	TA	-0.598785	-0.537021	0.48178	-0.969991	-0.738953	0.1021	0.140014	0.251285	0.684678	0.0153427	0.0836979	1
BnaC09g43670D	PP cycle	plastid	AT5G13420	Aldolase-type TIM barrel family protein	TA	-1.49735	-0.783122	0.173407	-0.92061	-0.641143	0.0198056	3.27778e-11	0.00173065	0.781206	8.9168e-05	0.0106713	1
BnaC05g09650D	PP cycle	plastid	AT1G12230	Aldolase superfamily protein	TA	-0.904145	-1.05039	0.318042	-0.70464	-1.23653	0.10867	0.000258999	6.46486e-05	0.52455	0.00698516	1.53719e-06	0.923719
BnaA06g08320D	PP cycle	plastid	AT1G12230	Aldolase superfamily protein	TA	0.450778	-0.356887	0.519254	-0.623168	-0.565345	0.20687	0.168053	0.365244	0.32625	0.0605236	0.108759	0.831536
BnaC08g41450D	PP cycle	plastid	AT1G12230	Aldolase superfamily protein	TA	-1.80441	1.0119	1.17168	0.930387	1.29985	1.0717	0.356601	0.687561	0.807144	0.670947	0.568157	0.823791
BnaAnng26460D	PP cycle	plastid	AT2G45290	Transketolase	TK	-1.08223	-0.33899	0.490942	-0.050014	-0.170399	-0.154332	0.000266813	0.383805	0.497824	0.934627	0.690088	0.917124
BnaA05g04720D	PP cycle	plastid	AT2G45290	Transketolase	TK	-1.38165	-0.307072	-0.103947	-0.716244	0.0535994	-0.175051	9.5335e-09	0.331436	0.931628	0.00538375	0.906926	0.834168
BnaC04g22010D	PP cycle	plastid	AT3G60750	Transketolase	TK	-1.68359	-1.23329	-0.124861	-0.831316	-1.00073	0.203995	4.3629e-10	1.76132e-05	0.904185	0.00372595	0.000553222	0.79933
BnaCnng31080D	PP cycle	plastid	AT3G60750	Transketolase	TK	0.595836	0.59092	0.175401	0.569229	0.405418	-0.0543031	0.0213776	0.0422115	0.82288	0.0390537	0.190074	1
BnaA04g01120D	PP cycle	plastid	AT3G60750	Transketolase	TK	-1.45406	-1.08487	-0.253003	-1.01622	-1.00244	0.199389	1.21189e-08	7.35424e-05	0.659624	0.000124568	0.00024171	0.789345
BnaC08g30890D	PP cycle	plastid	AT3G60750	Transketolase	TK	0.39231	-0.438652	-0.0766551	0.354504	-0.467446	0.197328	0.232538	0.234488	0.975926	0.320547	0.184968	0.829396
BnaC05g15760D	PP cycle	plastid	AT3G60750	Transketolase	TK	0.857403	0.349561	-0.147004	0.857532	0.475414	0.219827	4.78301e-05	0.187566	0.794254	7.93739e-05	0.047804	0.674982
BnaA09g38720D	PP cycle	plastid	AT3G60750	Transketolase	TK	0.568714	-0.523088	-0.0581923	0.357787	-0.414267	0.234944	0.0454739	0.108379	0.988898	0.262712	0.208645	0.731971
BnaC02g36240D	Calvin cycle	plastid	AT3G26650	GAPA_GAPA-1__glyceraldehyde 3-phosphate dehydrogenase A subunit	GAPA-1	1.67306	0.646833	0.135564	-0.0964381	-0.753611	0.263299	0.00449499	0.575109	0.932626	0.944772	0.497327	0.799508
BnaC07g23750D	Calvin cycle	plastid	AT3G26650	GAPA_GAPA-1__glyceraldehyde 3-phosphate dehydrogenase A subunit	GAPA-1	1.24184	-0.345203	-0.165957	0.632622	-1.40336	0.0815687	0.00573846	0.532237	0.869323	0.35687	0.012934	0.98341
BnaA02g28150D	Calvin cycle	plastid	AT3G26650	GAPA_GAPA-1__glyceraldehyde 3-phosphate dehydrogenase A subunit	GAPA-1	1.07471	-0.0581251	0.146798	-0.623613	1.28127	0.364094	0.223515	0.969219	0.860668	0.591459	0.315065	0.519349
BnaA06g32740D	Calvin cycle	plastid	AT3G26650	GAPA_GAPA-1__glyceraldehyde 3-phosphate dehydrogenase A subunit	GAPA-1	1.91528	-1.01904	-0.0855452	0.340465	-0.774672	0.246881	8.95724e-05	0.267995	0.979093	0.67097	0.320269	0.807665
BnaC05g09210D	Calvin cycle	plastid	AT1G12900	GAPA-2__glyceraldehyde 3-phosphate dehydrogenase A subunit 2	GAPA-2	0.798974	0.384212	-0.122515	-0.927454	-0.521874	0.11977	0.250102	0.699206	0.986887	0.206757	0.540843	0.996395
BnaC08g40850D	Calvin cycle	plastid	AT1G12900	GAPA-2__glyceraldehyde 3-phosphate dehydrogenase A subunit 2	GAPA-2	2.59751	0.396162	-0.210489	1.10638	-0.985451	0.0851325	1.82079e-06	0.615316	0.92037	0.069143	0.17703	1
BnaA06g07790D	Calvin cycle	plastid	AT1G12900	GAPA-2__glyceraldehyde 3-phosphate dehydrogenase A subunit 2	GAPA-2	1.82155	-0.196236	0.00761574	0.198067	1.0165	0.142525	0.0445645	0.903174	1	0.897355	0.384022	1
BnaA09g46780D	Calvin cycle	plastid	AT1G12900	GAPA-2__glyceraldehyde 3-phosphate dehydrogenase A subunit 2	GAPA-2	2.48417	-0.108147	-0.188584	0.815524	-1.14841	0.146474	4.8606e-07	0.91471	0.92212	0.172145	0.0924528	0.965846
BnaA08g04610D	Calvin cycle	plastid	AT1G42970	GAPB__glyceraldehyde-3-phosphate dehydrogenase B subunit	GAPB	1.04635	-0.368958	-0.234719	-0.478564	0.357273	-0.0317291	0.097856	0.684044	0.901256	0.552254	0.686714	1
BnaC08g46180D	Calvin cycle	plastid	AT1G42970	GAPB__glyceraldehyde-3-phosphate dehydrogenase B subunit	GAPB	0.329994	-0.167648	0.0210449	-0.578888	0.106451	0.0613426	0.701436	0.881275	1	0.517164	0.949603	1
BnaC05g12400D	Calvin cycle	plastid	AT1G16300	GAPCP-2__glyceraldehyde-3-phosphate dehydrogenase of plastid 2	GAPCP-2	0.25025	0.568707	-0.235121	0.561739	0.558871	0.0340324	0.603726	0.248392	0.888318	0.225305	0.237981	1
BnaA06g10900D	Calvin cycle	plastid	AT1G16300	GAPCP-2__glyceraldehyde-3-phosphate dehydrogenase of plastid 2	GAPCP-2	-0.358144	-0.0605379	0.253858	-0.264571	-0.139035	-0.174934	0.244802	0.908818	0.728162	0.447374	0.738321	0.866988
BnaC01g30110D	Calvin cycle	plastid	AT1G79530	GAPCP-1__glyceraldehyde-3-phosphate dehydrogenase of plastid 1	GAPCP-1	-2.28987	-1.32386	-0.0990289	-2.1009	-1.1441	0.082995	3.94411e-06	0.0162669	0.996619	3.35997e-05	0.0371227	1
BnaA07g20300D	Calvin cycle	plastid	AT1G79530	GAPCP-1__glyceraldehyde-3-phosphate dehydrogenase of plastid 1	GAPCP-1	-1.17866	-0.880303	-0.531649	-1.87304	-0.605526	-0.621184	0.000519173	0.020789	0.561574	5.78075e-08	0.129957	0.797648
BnaC02g25850D	Calvin cycle	plastid	AT1G79530	GAPCP-1__glyceraldehyde-3-phosphate dehydrogenase of plastid 1	GAPCP-1	-2.10427	-1.56842	-0.12742	-1.55674	-1.17659	-0.476381	8.14588e-08	0.000179367	0.962403	0.000126299	0.00542493	0.658944
BnaC06g19790D	Calvin cycle	plastid	AT1G79530	GAPCP-1__glyceraldehyde-3-phosphate dehydrogenase of plastid 1	GAPCP-1	-2.92671	-1.61025	-0.928873	-2.35734	-1.70343	0.0429965	1.12395e-12	0.00020632	0.173027	1.03971e-08	6.55317e-05	1
BnaC04g51320D	Calvin cycle	plastid	AT2G47400	CP12-1__CP12 domain-containing protein 1	CP12-1	1.95451	2.10153	-1.83971	-0.692036	0.199771	-0.232882	0.0796097	0.192292	0.226443	0.784181	0.963554	0.986056
BnaA03g21770D	Calvin cycle	plastid	AT2G47400	CP12-1__CP12 domain-containing protein 1	CP12-1	2.64575	-0.164833	0.300259	1.09419	-0.127415	-0.225152	7.00375e-06	0.913761	0.840341	0.0837882	0.931722	0.916519
BnaA05g00550D	Calvin cycle	plastid	AT2G47400	CP12-1__CP12 domain-containing protein 1	CP12-1	2.25748	0.676961	0.00040391	0.63904	-0.00112308	-0.274353	4.51062e-07	0.258003	1	0.288491	1	0.840423
BnaC03g26040D	Calvin cycle	plastid	AT2G47400	CP12-1__CP12 domain-containing protein 1	CP12-1	2.57776	0.69472	-0.285464	1.35354	0.80924	-0.206622	2.02015e-07	0.285584	0.808343	0.0489152	0.322336	0.902958
BnaA04g26990D	Calvin cycle	plastid	AT2G47400	CP12-1__CP12 domain-containing protein 1	CP12-1	1.4358	0.96853	-0.267803	0.638378	0.833406	-0.12076	4.47081e-06	0.0128087	0.700811	0.0732303	0.0371535	0.936568
BnaC04g51970D	Calvin cycle	plastid	AT2G47400	CP12-1__CP12 domain-containing protein 1	CP12-1	1.96282	1.81603	-0.133937	-0.0342486	1.46324	0.0322329	0.0206029	0.0733636	1	1	0.131013	1
BnaA09g39860D	Calvin cycle	plastid	AT3G62410	CP12-2__CP12 domain-containing protein 2	CP12-2	2.23612	-0.319661	0.814959	1.20224	-0.0360201	0.908974	6.88959e-07	0.62752	0.219351	0.0110476	0.982664	0.189786
BnaC08g32210D	Calvin cycle	plastid	AT3G62410	CP12-2__CP12 domain-containing protein 2	CP12-2	2.00113	1.88892	0.254886	0.738279	1.18349	0.520715	0.000917615	0.00570473	0.886393	0.282453	0.143061	0.688645
BnaA07g19320D	Calvin cycle	plastid	AT3G62410	CP12-2__CP12 domain-containing protein 2	CP12-2	1.51549	0.0823807	0.331875	-1.10699	-3.54935	0.613779	0.266147	0.991126	0.883664	0.575743	0.0749121	0.725771
BnaC06g18520D	Calvin cycle	plastid	AT3G62410	CP12-2__CP12 domain-containing protein 2	CP12-2	0.539914	-1.20855	0.272908	-1.23606	-1.02355	0.274471	0.674217	0.531619	0.67187	0.375257	0.607562	0.717619
BnaC06g37420D	Calvin cycle	plastid	AT1G76560	CP12-3__CP12 domain-containing protein 3	CP12-3	2.38385	0.316965	0.453255	1.60022	0.440242	0.209624	6.00612e-13	0.494963	0.491077	2.05828e-06	0.289217	0.846738
BnaA07g32870D	Calvin cycle	plastid	AT1G76560	CP12-3__CP12 domain-containing protein 3	CP12-3	3.46407	-0.349415	0.317416	2.64645	0.351079	0.0244789	5.66714e-17	0.533625	0.759455	1.13769e-10	0.508642	1
BnaC05g24200D	Calvin cycle	plastid	AT1G32060	PRK__phosphoribulokinase	PRK	1.86616	-0.43167	-0.0545056	-0.936393	-1.81703	0.236186	0.0141584	0.759917	1	0.30688	0.0850541	0.830388
BnaA05g16480D	Calvin cycle	plastid	AT1G32060	PRK__phosphoribulokinase	PRK	-1.34448	-0.681029	0.337697	-1.25519	1.05471	0.214894	0.268892	0.622629	0.571192	0.142693	0.266714	0.794376
BnaA09g54020D	Calvin cycle	plastid	AT1G32060	PRK__phosphoribulokinase	PRK	0.390175	0.495977	-0.125807	-0.764658	-0.22846	0.21664	0.563878	0.616313	0.951929	0.344348	0.80965	0.869597
BnaA08g07000D	Calvin cycle	plastid	AT1G32060	PRK__phosphoribulokinase	PRK	1.25322	-0.157542	-0.166054	-0.0869344	-0.587995	0.226668	0.043412	0.881153	0.905305	0.951075	0.493096	0.850418
BnaC08g07850D	Calvin cycle	plastid	AT1G32060	PRK__phosphoribulokinase	PRK	-0.171303	-0.286364	-0.0263552	-0.129586	-0.774071	0.243442	0.849013	0.783671	1	0.926024	0.414901	0.839571
BnaAnng15110D	Calvin cycle	plastid	AT5G64380	Inositol monophosphatase family protein	FBPaseP1	0.213833	-0.277329	0.124814	0.0956223	-0.968809	-0.368749	0.665338	0.645984	0.936507	0.890609	0.0361595	0.650946
BnaC03g49790D	Calvin cycle	plastid	AT5G64380	Inositol monophosphatase family protein	FBPaseP1	0.502423	0.731052	0.457108	0.429232	0.122207	-0.00847088	0.0596861	0.011053	0.206075	0.140417	0.757577	1
BnaAnng17200D	Calvin cycle	plastid	AT3G54050	HCEF1__high cyclic electron flow 1	FBPaseP2	0.27931	-1.34329	-0.247772	-1.53327	-0.319311	0.16839	0.723949	0.359333	0.732768	0.232685	0.775394	0.871714
BnaA04g04350D	Calvin cycle	plastid	AT3G54050	HCEF1__high cyclic electron flow 1	FBPaseP2	1.0376	1.32863	-0.295718	1.12167	-0.510649	0.0326299	0.188015	0.282102	0.607872	0.190308	0.687204	1
BnaC03g28890D	Calvin cycle	plastid	AT3G54050	HCEF1__high cyclic electron flow 1	FBPaseP2	0.00162691	0.376712	0.0771629	1.78058	0.00461277	0.00802872	1	0.465481	0.998774	0.380025	1	1
BnaC04g26530D	Calvin cycle	plastid	AT3G54050	HCEF1__high cyclic electron flow 1	FBPaseP2	0.593682	0.835873	-0.328701	0.209185	0.959	-0.0694196	0.0521528	0.00770341	0.483531	0.605064	0.00147341	0.977372
BnaC08g48810D	Calvin cycle	plastid	AT3G54050	HCEF1__high cyclic electron flow 1	FBPaseP2	0.61342	-0.292783	-0.146327	-0.0427489	0.310727	0.169745	0.483885	0.887452	0.945473	1	0.846283	0.936722
BnaC06g15060D	Calvin cycle	plastid	AT3G54050	HCEF1__high cyclic electron flow 1	FBPaseP2	-1.22829	0.365091	-0.0488165	0.995579	-2.11923	-0.53313	0.07745	0.715928	1	0.539267	0.168223	0.640783
BnaC09g23900D	Calvin cycle	plastid	AT3G54050	HCEF1__high cyclic electron flow 1	FBPaseP2	0.49519	0.702422	0.212338	0.00868773	0.761889	0.293906	0.0979557	0.0281925	0.783501	1	0.0140392	0.709598

## Sheet: sucrolysis
ID	pathway	localization	AGI	annotation	Name	logFC.Root_H4h_AV	logFC.Root_H24h_AV	logFC.Leaf_H24h_AV	logFC.Root_H4h_ZS	logFC.Root_H24h_ZS	logFC.Leaf_H24h_ZS	FDR.Root_H4h_AV	FDR.Root_H24h_AV	FDR.Leaf_H24h_AV	FDR.Root_H4h_ZS	FDR.Root_H24h_ZS	FDR.Leaf_H24h_ZS
BnaA03g59380D	sucrolysis	mito	AT1G56560	A/N-InvA__Plant neutral invertase family protein	A/N-INVA	-0.036845	-0.197003	-0.214899	0.0428564	0.0661322	-0.0137893	0.914217	0.527795	0.662942	0.921886	0.86186	1
BnaC04g18190D	sucrolysis	mito	AT1G56560	A/N-InvA__Plant neutral invertase family protein	A/N-INVA	-0.318401	0.123248	-0.567433	0.224515	0.617069	-0.0235028	0.295087	0.776119	0.176802	0.521492	0.0409428	1
BnaC01g03610D	sucrolysis	cytosol	AT4G34860	A/N-InvB__Plant neutral invertase family protein	A/N-INVB	0.177937	-0.0432515	0.145803	0.226241	-0.130129	-0.554198	0.652598	0.948036	0.959382	0.582967	0.782901	0.647728
BnaA01g02350D	sucrolysis	cytosol	AT4G34860	A/N-InvB__Plant neutral invertase family protein	A/N-INVB	0.18644	0.246748	0.369494	-0.00192948	-0.0168294	-1.22889	0.613917	0.554219	0.667301	1	0.998165	0.838087
BnaC03g65720D	sucrolysis	cytosol	AT4G34860	A/N-InvB__Plant neutral invertase family protein	A/N-INVB	-0.459753	-0.633646	0.320079	-0.249312	0.432918	0.987531	0.576089	0.487265	0.889673	0.813002	0.651492	0.480124
BnaC05g45320D	sucrolysis	mito	AT3G06500	A/N-InvC__Plant neutral invertase family protein	A/N-INVC	0.0926745	0.39591	-0.215306	-0.0322307	0.230228	0.502047	0.833933	0.325784	0.798652	0.974016	0.596642	0.416281
BnaA05g30860D	sucrolysis	mito	AT3G06500	A/N-InvC__Plant neutral invertase family protein	A/N-INVC	1.18899	0.561724	0.136535	0.577174	0.762755	0.0813558	0.00042142	0.172633	0.937705	0.12843	0.043485	0.996746
BnaA09g30480D	sucrolysis	cytosol	AT1G22650	A/N-InvD__Plant neutral invertase family protein	A/N-INVD	-0.324119	-0.515389	-0.129864	-0.429652	-0.671928	-0.390267	0.243227	0.0815578	0.910522	0.129485	0.0157143	0.56276
BnaC05g17920D	sucrolysis	cytosol	AT1G22650	A/N-InvD__Plant neutral invertase family protein	A/N-INVD	-0.150379	-0.297717	0.171686	-0.262114	-0.635828	-0.902858	0.625402	0.364622	0.872738	0.390968	0.0215125	0.0593229
BnaA02g05710D	sucrolysis	plastid	AT5G22510	A/N-InvE_At-A/N-InvE_INV-E__alkaline/neutral invertase	A/N-INVE	-1.14493	2.16576	-0.00298711	-1.21292	1.69512	-0.00522909	0.371559	0.146554	1	0.13436	0.205368	1
BnaA10g13840D	sucrolysis	plastid	AT5G22510	A/N-InvE_At-A/N-InvE_INV-E__alkaline/neutral invertase	A/N-INVE	-0.641676	-0.101002	0.0311918	-0.669893	-0.388964	0.281315	0.111167	0.880149	1	0.108968	0.414326	0.792088
BnaC09g36460D	sucrolysis	plastid	AT5G22510	A/N-InvE_At-A/N-InvE_INV-E__alkaline/neutral invertase	A/N-INVE	-0.426392	-0.244477	0.0283114	-0.327681	-0.480439	0.29627	0.0597463	0.396204	1	0.195189	0.0522611	0.520629
	sucrolysis	cytosol	AT1G72000	A/N-InvF__Plant neutral invertase family protein	A/N-INVF
BnaC08g06790D	sucrolysis	cytosol	AT1G35580	A/N-InvG_CINV1__cytosolic invertase 1	A/N-INVG	-0.85611	-0.268992	0.717971	-0.721464	0.127437	-0.50694	0.000920992	0.446677	0.301969	0.0081037	0.751497	0.556863
BnaA05g34980D	sucrolysis	cytosol	AT1G35580	A/N-InvG_CINV1__cytosolic invertase 1	A/N-INVG	-1.25614	-1.23334	0.349625	-1.1776	-1.17696	-0.259977	0.000838009	0.00250014	0.710167	0.00246696	0.00348166	0.836454
BnaAnng38240D	sucrolysis	cytosol	AT1G35580	A/N-InvG_CINV1__cytosolic invertase 1	A/N-INVG	-1.38377	-1.27997	0.452073	-1.39288	-1.50714	0.0535525	4.87759e-05	0.000484304	0.517329	6.40846e-05	2.38482e-05	1
BnaA08g06300D	sucrolysis	cytosol	AT1G35580	A/N-InvG_CINV1__cytosolic invertase 1	A/N-INVG	-0.607442	-0.396036	0.092702	-0.288207	-0.155385	-0.132327	0.00659748	0.135321	0.965829	0.271335	0.613029	0.924214
	sucrolysis	plastid	AT3G05820	A/N-InvH_At-A/N-InvH_INVH__invertase H	A/N-INVH
BnaA03g24030D	sucrolysis	cytosol	AT4G09510	A/N-InvI_CINV2__cytosolic invertase 2	A/N-INVI	-0.0612603	-0.467601	0.399222	-0.493131	0.465958	0.932475	0.941856	0.502921	0.762481	0.437525	0.48348	0.337411
BnaC03g28560D	sucrolysis	cytosol	AT4G09510	A/N-InvI_CINV2__cytosolic invertase 2	A/N-INVI	-0.0723594	0.410199	0.525749	-0.341398	-0.00316656	0.0289272	0.858757	0.249553	0.297696	0.324047	1	1
BnaA01g37220D	sucrolysis	cell wall	AT3G13790	ATBFRUCT1_ATCWINV1__Glycosyl hydrolases family 32 protein	CWINV1	0.398828	-0.436638	-0.34996	0.140333	-0.650335	-1.141	0.437543	0.460098	0.783619	0.841829	0.218416	0.123715
BnaC05g39500D	sucrolysis	cell wall	AT3G13790	ATBFRUCT1_ATCWINV1__Glycosyl hydrolases family 32 protein	CWINV1	0.789039	-0.131068	-1.66457	1.49523	0.120013	-2.35305	0.578518	0.960385	0.549906	0.278839	0.967412	0.408177
BnaC01g37450D	sucrolysis	cell wall	AT3G13790	ATBFRUCT1_ATCWINV1__Glycosyl hydrolases family 32 protein	CWINV1	-0.378613	-1.17345	-1.8657	1.44515	-10.9048	-4.86358	0.867042	0.607934	0.661321	0.564101	4.53748e-05	0.307261
BnaA05g25600D	sucrolysis	cell wall	AT3G13790	ATBFRUCT1_ATCWINV1__Glycosyl hydrolases family 32 protein	CWINV1	1.92742	0.988528	1.38934	1.7674	1.02218	-1.30731	5.38618e-05	0.0726871	0.123433	0.00030433	0.0552356	0.65679
	sucrolysis	cell wall	AT3G52600	AtcwINV2_CWINV2__cell wall invertase 2	CWINV2
BnaA06g00510D	sucrolysis	cell wall	AT1G55120	AtcwINV3_ATFRUCT5_FRUCT5__beta-fructofuranosidase 5	CWINV3	-0.891332	0.734366	0.600356	-0.772856	0.490291	0.312353	0.000545587	0.0116519	0.302915	0.00402069	0.103588	0.67937
BnaC06g07120D	sucrolysis	cell wall	AT1G55120	AtcwINV3_ATFRUCT5_FRUCT5__beta-fructofuranosidase 5	CWINV3	-1.28931	-0.0771459	0.129738	-1.31119	-0.296406	0.0159311	3.89012e-09	0.837022	0.865481	4.16295e-09	0.279367	1
BnaC03g19970D	sucrolysis	cell wall	AT2G36190	AtcwINV4_cwINV4__cell wall invertase 4	CWINV4	2.6596	-0.0210856	0.0448216	1.7748	0.00225393	0.078774	0.10647	1	1	0.383396	1	1
BnaC05g39510D	sucrolysis	cell wall	AT3G13784	AtcwINV5_CWINV5__cell wall invertase 5	CWINV5	-1.11937	-2.05618	1.48521	-1.66212	0.51946	0.644808	0.442613	0.225034	0.221636	0.118914	0.693486	0.721475
BnaC03g05170D	sucrolysis	cell wall	AT5G11920	AtcwINV6_cwINV6__6-&1-fructan exohydrolase	CWINV6	-2.47897	-0.748065	-2.31234	-1.26276	-0.519703	0.459265	3.658e-05	0.320346	0.638434	0.0566027	0.510933	0.994
BnaC09g44700D	sucrolysis	cell wall	AT5G11920	AtcwINV6_cwINV6__6-&1-fructan exohydrolase	CWINV6	-0.502176	-0.692793	2.28663	0.654921	-0.217623	-0.0766104	0.416182	0.307969	0.638434	0.319335	0.793081	1
BnaA10g20680D	sucrolysis	cell wall	AT5G11920	AtcwINV6_cwINV6__6-&1-fructan exohydrolase	CWINV6	-0.060616	-0.282565	1.89656	0.870167	0.0725034	0.739964	0.929737	0.661804	0.137344	0.0688848	0.93506	0.642854
BnaC09g10840D	sucrolysis	cytosol	AT1G62660	Glycosyl hydrolases family 32 protein	VI1	-0.575877	-1.52064	0.0564378	-0.904141	-1.63116	-0.224387	0.386895	0.0212464	1	0.171031	0.00974988	0.95454
BnaC09g13230D	sucrolysis	cytosol	AT1G62660	Glycosyl hydrolases family 32 protein	VI1	-2.23497	-1.72072	-0.140483	-2.86515	-2.13796	0.104298	3.38681e-05	0.00339758	0.975289	2.26658e-07	0.000179156	1
BnaC09g10830D	sucrolysis	cytosol	AT1G62660	Glycosyl hydrolases family 32 protein	VI1	-1.76026	-3.04406	0.738691	-1.2869	-2.09931	1.00979	0.00772215	2.01591e-05	0.941609	0.067503	0.00285714	0.761159
BnaA09g10560D	sucrolysis	cytosol	AT1G62660	Glycosyl hydrolases family 32 protein	VI1	-1.61792	-2.28159	-0.978204	-1.34433	-2.13478	-2.70403	0.0187535	0.00230244	0.807227	0.0631432	0.00327099	0.28594
BnaA09g12880D	sucrolysis	cytosol	AT1G62660	Glycosyl hydrolases family 32 protein	VI1	-1.97346	-1.76397	-0.542115	-1.9119	-2.13073	0.239315	0.000432647	0.00383986	0.656648	0.00089298	0.000336873	0.922944
BnaA09g10570D	sucrolysis	cytosol	AT1G62660	Glycosyl hydrolases family 32 protein	VI1	-0.0089157	-1.32441	0.00970684	-0.444202	-1.43643	-0.0410255	1	0.0861846	1	0.598078	0.054168	1
BnaC05g09640D	sucrolysis	cytosol	AT1G12240	ATBETAFRUCT4_VAC-INV__Glycosyl hydrolases family 32 protein	VI2	-3.60568	-2.67877	-0.181605	-4.16668	-2.40402	-0.167728	5.95222e-15	4.69434e-09	0.913846	4.94481e-18	1.33941e-07	0.937914
BnaA06g08310D	sucrolysis	cytosol	AT1G12240	ATBETAFRUCT4_VAC-INV__Glycosyl hydrolases family 32 protein	VI2	-4.14633	-2.65247	-0.0161412	-4.03556	-3.43594	-0.252012	3.62351e-18	8.69459e-09	1	3.17506e-14	9.19457e-12	0.83349
BnaC08g41390D	sucrolysis	cytosol	AT1G12240	ATBETAFRUCT4_VAC-INV__Glycosyl hydrolases family 32 protein	VI2	-3.43264	-2.23364	-0.165133	-2.09639	-1.62906	0.555786	9.16078e-11	3.71534e-05	0.951854	6.48331e-05	0.00277944	0.640562
BnaA09g47290D	sucrolysis	cytosol	AT1G12240	ATBETAFRUCT4_VAC-INV__Glycosyl hydrolases family 32 protein	VI2	-1.1575	-1.22242	0.292559	-1.3307	-1.04208	0.482497	0.0058905	0.00680905	0.783619	0.00189203	0.0210582	0.616939
BnaC09g37040D	sucrolysis	cytosol	AT5G20830	ASUS1_atsus1_SUS1__sucrose synthase 1	SUS1	3.43646	1.93457	-0.349805	3.64739	2.71457	0.592018	1.74116e-17	2.62233e-06	0.705209	4.07289e-19	2.17497e-11	0.471834
BnaA03g08110D	sucrolysis	cytosol	AT5G20830	ASUS1_atsus1_SUS1__sucrose synthase 1	SUS1	5.46589	4.39061	-0.562999	6.04387	3.65703	-1.06406	2.21392e-13	3.43793e-09	0.723314	3.33674e-15	6.28632e-07	0.432008
BnaA10g14710D	sucrolysis	cytosol	AT5G20830	ASUS1_atsus1_SUS1__sucrose synthase 1	SUS1	4.55129	2.93808	-0.0967255	4.29561	3.32341	0.895664	4.81719e-37	1.55353e-17	0.969164	1.2667e-33	9.04828e-22	0.114807
BnaC05g44340D	sucrolysis	cytosol	AT5G20830	ASUS1_atsus1_SUS1__sucrose synthase 1	SUS1	5.36997	3.2802	-3.48576	6.02832	4.59083	-0.283506	1.25045e-28	1.60847e-12	0.0310168	8.57923e-34	1.3651e-21	0.926041
BnaC03g10290D	sucrolysis	cytosol	AT5G20830	ASUS1_atsus1_SUS1__sucrose synthase 1	SUS1	5.80653	3.20814	-0.191319	6.14165	4.1752	0.333737	1.7774e-24	2.21596e-09	0.938821	1.96195e-26	1.71486e-14	0.837702
BnaC02g31640D	sucrolysis	cytosol	AT5G49190	ATSUS2_SSA_SUS2__sucrose synthase 2	SUS2	1.81957	1.05397	0.292148	2.97108	1.69912	0.572635	3.64738e-06	0.0174074	0.78386	8.58498e-12	0.000266617	0.595078
BnaC09g14230D	sucrolysis	cytosol	AT5G49190	ATSUS2_SSA_SUS2__sucrose synthase 2	SUS2	0.789804	0.519503	0.464089	-0.453188	0.0955892	1.68855	0.0449985	0.313109	0.623891	0.480171	0.932171	0.269416
BnaC02g09240D	sucrolysis	cytosol	AT4G02280	ATSUS3_SUS3__sucrose synthase 3	SUS3	0.0224648	1.38307	0.21606	0.355851	0.00724052	-0.580384	0.998862	0.378707	0.99594	0.903353	1	0.918829
BnaCnng23260D	sucrolysis	cytosol	AT4G02280	ATSUS3_SUS3__sucrose synthase 3	SUS3	1.84664	0.963098	0.670246	0.55	0.293548	0.363648	0.00148475	0.155221	0.509251	0.425832	0.705277	0.809223
	sucrolysis	cytosol	AT3G43190	ATSUS4_SUS4__sucrose synthase 4	SUS4
BnaCnng74430D	sucrolysis	cytosol	AT5G37180	ATSUS5_SUS5__sucrose synthase 5	SUS5	-0.719307	-1.04879	-0.135231	-0.785222	-1.31056	0.107114	0.0855554	0.0175974	0.951697	0.0683278	0.00216156	0.984183
BnaA05g12940D	sucrolysis	cytosol	AT5G37180	ATSUS5_SUS5__sucrose synthase 5	SUS5	-1.23505	-1.47632	-0.0324017	-0.99084	-1.78558	0.278749	0.00109643	0.000237215	1	0.0127345	5.666e-06	0.802356
BnaC06g12120D	sucrolysis	cytosol	AT5G37180	ATSUS5_SUS5__sucrose synthase 5	SUS5	-0.975876	-1.11203	0.132284	-0.885571	-1.25339	0.140777	0.00220477	0.00110552	0.922207	0.00738847	0.000151687	0.922944
BnaC06g23590D	sucrolysis	cytosol	AT1G73370	ATSUS6_SUS6__sucrose synthase 6	SUS6	-0.656259	-0.678527	0.65993	-0.40285	-0.905691	0.0419849	0.111652	0.143406	0.388108	0.395638	0.0356739	1
BnaA07g22680D	sucrolysis	cytosol	AT1G73370	ATSUS6_SUS6__sucrose synthase 6	SUS6	-0.73907	-0.789666	0.259515	-0.502353	-0.774406	0.248111	0.188914	0.211828	0.895314	0.427283	0.209946	0.909305
BnaA07g30830D	sucrolysis	cytosol	AT1G73370	ATSUS6_SUS6__sucrose synthase 6	SUS6	-0.0167529	-0.46806	0.00337179	-0.242592	-0.849022	0.224029	0.985034	0.292116	1	0.601337	0.0306477	0.849093
BnaC06g34330D	sucrolysis	cytosol	AT1G73370	ATSUS6_SUS6__sucrose synthase 6	SUS6	1.52566	2.31386	0.471494	-0.515958	-1.06074	0.272522	0.0117676	0.000303819	0.74496	0.489692	0.122904	0.912765
BnaAnng25620D	sucrolysis	cytosol	AT3G03250	AtUGP1_UGP_UGP1__UDP-GLUCOSE PYROPHOSPHORYLASE 1	UGP1	-1.21766	-0.553788	-0.212054	-0.656526	-0.424499	0.193051	1.80398e-07	0.0415875	0.703748	0.00873122	0.124911	0.76827
BnaCnng53900D	sucrolysis	cytosol	AT3G03250	AtUGP1_UGP_UGP1__UDP-GLUCOSE PYROPHOSPHORYLASE 1	UGP1	-1.364	-0.672136	0.168264	-0.951311	-0.588397	-0.0008462	7.62095e-07	0.0348284	0.842677	0.000919281	0.0621759	1
BnaA05g32480D	sucrolysis	cytosol	AT3G03250	AtUGP1_UGP_UGP1__UDP-GLUCOSE PYROPHOSPHORYLASE 1	UGP1	-0.933438	-0.618137	-0.351232	-0.653386	-0.525039	0.124851	0.00100873	0.057929	0.541622	0.0324849	0.108377	0.921808
BnaA01g34430D	sucrolysis	cytosol	AT3G03250	AtUGP1_UGP_UGP1__UDP-GLUCOSE PYROPHOSPHORYLASE 1	UGP1	-0.996347	-0.590972	0.0278478	-0.637764	-0.0781351	1.08368	0.21617	0.556078	1	0.484668	0.966741	0.467464
BnaC03g08340D	sucrolysis	cytosol	AT5G17310	AtUGP2_UGP2__UDP-glucose pyrophosphorylase 2	UGP2	4.79423	3.65736	-0.243088	4.99022	4.07509	0.258785	1.91841e-10	1.51445e-06	0.940049	7.35066e-11	7.9343e-08	0.944319
BnaA03g06500D	sucrolysis	cytosol	AT5G17310	AtUGP2_UGP2__UDP-glucose pyrophosphorylase 2	UGP2	3.48413	2.64945	-0.210712	3.28124	2.57559	0.501273	5.13464e-22	3.21737e-13	0.843711	9.43805e-20	9.88657e-13	0.505493
BnaA09g55090D	sucrolysis	plastid	AT3G56040	UGP3__UDP-glucose pyrophosphorylase 3	UGP3	1.29501	0.777575	0.0812355	1.01593	0.63129	0.161045	1.97959e-06	0.0144664	0.947151	0.000266703	0.0420471	0.825086
BnaC08g26960D	sucrolysis	plastid	AT3G56040	UGP3__UDP-glucose pyrophosphorylase 3	UGP3	0.775757	0.565838	0.0735606	0.915881	0.492462	0.204704	0.0189315	0.147887	0.981095	0.00656701	0.201227	0.826

## Sheet: glycolysis+fermentation
ID	pathway	localization	AGI	annotation	Name	logFC.Root_H4h_AV	logFC.Root_H24h_AV	logFC.Leaf_H24h_AV	logFC.Root_H4h_ZS	logFC.Root_H24h_ZS	logFC.Leaf_H24h_ZS	FDR.Root_H4h_AV	FDR.Root_H24h_AV	FDR.Leaf_H24h_AV	FDR.Root_H4h_ZS	FDR.Root_H24h_ZS	FDR.Leaf_H24h_ZS
	glycolysis	mito	AT4G29130	ATHXK1_GIN2_HXK1__hexokinase 1	HXK1
BnaC07g01200D	glycolysis	mito	AT2G19860	ATHXK2_HXK2__hexokinase 2	HXK2	-0.604055	-0.329955	-0.0839535	-0.385491	-0.434429	0.163236	0.00110712	0.137379	0.903248	0.0603895	0.0365773	0.734
BnaC09g10170D	glycolysis	mito	AT2G19860	ATHXK2_HXK2__hexokinase 2	HXK2	-0.0249847	-0.676388	-0.568211	0.141858	-0.353067	-0.0515363	0.955983	0.0186941	0.143515	0.694456	0.259575	1
BnaA07g00920D	glycolysis	mito	AT2G19860	ATHXK2_HXK2__hexokinase 2	HXK2	0.562467	0.36488	0.247829	0.788465	0.60388	0.599024	0.117974	0.415586	0.776002	0.0283863	0.120909	0.339972
BnaA09g10080D	glycolysis	mito	AT2G19860	ATHXK2_HXK2__hexokinase 2	HXK2	-0.287698	-0.0866569	-0.732586	-0.112706	-1.02853	-1.18155	0.695419	0.943088	0.528631	0.919566	0.132425	0.247783
BnaA05g19110D	glycolysis	mito	AT3G20040	ATHXK4_HKL2__Hexokinase	HXK4,HKL2	0.325227	-0.076895	0.148416	0.236089	0.205647	-0.617669	0.452651	0.913449	0.93678	0.641704	0.711152	0.506277
BnaC05g32490D	glycolysis	mito	AT3G20040	ATHXK4_HKL2__Hexokinase	HXK4,HKL2	-0.322572	-0.323914	0.00207791	-0.461547	-0.0581161	-0.395434	0.218315	0.281149	1	0.0798139	0.892474	0.480142
BnaC05g26650D	glycolysis	mito	AT1G50460	ATHKL1_HKL1__hexokinase-like 1	HKL1	3.63795	1.43227	-1.07214	3.21943	1.86414	-0.223512	9.98235e-14	0.00617887	0.456393	4.87474e-11	0.000198756	0.977198
BnaC06g03650D	glycolysis	mito	AT1G50460	ATHKL1_HKL1__hexokinase-like 1	HKL1	0.988888	0.396253	-0.172004	0.634231	0.873109	0.367816	0.000409629	0.262457	0.903918	0.0377683	0.00370934	0.636488
BnaA06g02800D	glycolysis	mito	AT1G50460	ATHKL1_HKL1__hexokinase-like 1	HKL1	1.81635	1.53703	0.00297354	1.69581	1.4188	-0.62482	0.00102018	0.0111595	1	0.00324705	0.0186918	0.66632
BnaA05g15840D	glycolysis	mito	AT1G50460	ATHKL1_HKL1__hexokinase-like 1	HKL1	3.37559	1.46594	-0.320159	3.03838	2.15129	-0.0216641	1.6874e-09	0.016532	0.904141	7.2671e-08	0.000205525	1
BnaA08g02130D	glycolysis	mito	AT1G50460	ATHKL1_HKL1__hexokinase-like 1	HKL1	2.76632	1.15094	0.319214	2.69413	1.46457	0.0113976	1.81236e-12	0.00999057	0.78927	9.47626e-12	0.000458489	1
BnaCnng58160D	glycolysis	mito	AT1G50460	ATHKL1_HKL1__hexokinase-like 1	HKL1	3.23124	1.70179	0.79849	2.95782	1.95197	-0.0293892	6.15322e-13	0.000325856	0.633746	5.43764e-11	2.36254e-05	1
BnaC03g68660D	glycolysis	mito	AT1G50460	ATHKL1_HKL1__hexokinase-like 1	HKL1	4.20223	1.77801	0.174546	3.43104	1.81603	-0.532172	2.13598e-10	0.0121561	0.973576	6.51159e-07	0.01571	0.815852
BnaC06g03640D	glycolysis	mito	AT1G50460	ATHKL1_HKL1__hexokinase-like 1	HKL1	0.877177	0.573589	-0.247969	0.232137	0.94799	3.481e-05	0.0352004	0.265821	0.979056	0.689438	0.0326003	1
BnaC03g61220D	glycolysis	mito	AT4G37840	HKL3__hexokinase-like 3	HKL3	-0.8648	0.552882	-0.00671561	0.230028	1.20209	-0.0099945	0.0604688	0.444759	1	0.677372	0.00624656	1
BnaA08g15820D	glycolysis	mito	AT4G37840	HKL3__hexokinase-like 3	HKL3	-0.483886	-0.331474	-0.0317718	0.044133	0.94998	-4.15237	0.346757	0.669658	1	0.972923	0.0548343	0.260811
BnaA10g05030D	glycolysis	plastid	AT1G47840	HXK3__hexokinase 3	HXK3	4.02248	2.74452	0.311161	3.59895	2.49739	0.204531	2.05755e-23	6.79936e-12	0.823792	2.03571e-19	3.50301e-10	0.901696
BnaC06g01220D	glycolysis	plastid	AT1G47840	HXK3__hexokinase 3	HXK3	4.46543	3.17067	-0.338682	4.36236	2.96401	-0.312457	6.5536e-22	4.92029e-12	0.818773	5.64313e-21	7.42513e-11	0.836208
BnaC06g43510D	glycolysis	plastid	AT1G66430	FRK3, FRK6, FRUCTOKINASE 3, FRUCTOKINASE 6	FRK3	-0.471337	-1.23453	-0.531954	-0.252752	-0.983961	0.0426228	0.396142	0.0228349	0.598265	0.704352	0.0690381	1
BnaA07g25850D	glycolysis	plastid	AT1G66430	FRK3, FRK6, FRUCTOKINASE 3, FRUCTOKINASE 6	FRK3	-0.338073	-1.00034	-0.0934574	-0.0225738	-0.726958	0.351668	0.300413	0.00173126	0.949993	0.986551	0.0270211	0.582381
BnaA09g34000D	glycolysis	plastid	AT3G54090	FLN1, FRUCTOKINASE-LIKE 1	FLN1	-0.178173	0.831647	-1.27177	0.883402	-0.396358	-0.630952	0.90394	0.526698	0.290979	0.505532	0.833039	0.704733
BnaC08g24930D	glycolysis	plastid	AT3G54090	FLN1, FRUCTOKINASE-LIKE 1	FLN1	0.198948	0.360108	-0.652547	0.470232	0.285798	-0.458322	0.561602	0.380469	0.0881586	0.181198	0.529216	0.37453
BnaA09g34010D	glycolysis	plastid	AT3G54090	FLN1, FRUCTOKINASE-LIKE 1	FLN1	-0.303815	-0.277839	-0.583112	0.116183	0.0966837	-0.963531	0.460153	0.611516	0.292332	0.839392	0.885961	0.0416521
BnaA07g27750D	glycolysis	plastid	AT1G69200	FLN2, FRUCTOKINASE-LIKE 2	FLN2	0.489079	0.157909	-1.13894	0.402096	-0.0989687	-1.17854	0.237238	0.799108	0.0157137	0.397643	0.889154	0.016602
BnaC06g30380D	glycolysis	plastid	AT1G69200	FLN2, FRUCTOKINASE-LIKE 2	FLN2	-0.306445	-0.0557254	-0.995723	0.0901191	0.0810634	-0.786711	0.532397	0.952457	0.0606706	0.901748	0.921166	0.218899
BnaA01g13990D	glycolysis	plastid	AT4G24620	PGI_PGI1__phosphoglucose isomerase 1	PGI	-0.42625	-1.27635	-0.0663982	-0.693454	-1.02716	-0.113791	0.0693612	3.96724e-08	0.96004	0.00392828	2.86431e-05	0.89467
BnaC01g16480D	glycolysis	plastid	AT4G24620	PGI_PGI1__phosphoglucose isomerase 1	PGI	-0.731482	-0.755595	-0.153319	-0.305638	-0.714916	0.615749	0.0631739	0.0843205	0.924744	0.523244	0.0961233	0.39314
BnaA03g46830D	glycolysis	plastid	AT4G24620	PGI_PGI1__phosphoglucose isomerase 1	PGI	-1.79806	-1.10662	-0.126744	-1.30811	-1.38532	0.198232	5.85503e-13	3.53297e-05	0.886776	2.99693e-07	9.83783e-08	0.786254
BnaC07g39050D	glycolysis	plastid	AT4G24620	PGI_PGI1__phosphoglucose isomerase 1	PGI	-2.51219	-1.47996	-0.331835	-1.7114	-1.33095	0.0719481	1.25013e-22	2.70944e-08	0.52628	3.02193e-11	5.77055e-07	0.980688
BnaA03g40360D	glycolysis	plastid	AT5G61580	PFK4__phosphofructokinase 4	PFK4	-1.73354	-2.0448	0.381787	-2.14757	-2.52581	0.374141	6.61286e-09	2.96404e-10	0.450098	2.42132e-12	7.31148e-15	0.506406
BnaC07g31330D	glycolysis	plastid	AT5G61580	PFK4__phosphofructokinase 4	PFK4	-2.27831	-1.40522	-0.0269717	-2.36371	-1.50281	0.131568	2.20567e-09	0.000767787	1	4.68876e-11	8.57589e-05	0.930371
BnaC08g35040D	glycolysis	plastid	AT2G22480	PFK5__phosphofructokinase 5	PFK5	-1.22347	-0.308754	-0.501714	-0.509127	-0.32771	-0.110022	2.55544e-05	0.432669	0.337625	0.124253	0.379489	0.95169
BnaA09g42580D	glycolysis	plastid	AT2G22480	PFK5__phosphofructokinase 5	PFK5	-0.39447	-0.354896	0.127398	-0.485111	-0.118264	0.444579	0.20954	0.337505	0.91763	0.132856	0.789236	0.457367
BnaC04g33570D	glycolysis	plastid	AT2G21330	FBA1__fructose-bisphosphate aldolase 1	FBA1	1.30285	-1.0135	-0.249621	-0.0172606	-2.82395	0.176908	0.00911372	0.048728	0.835668	1	2.8509e-08	0.923719
BnaA04g12130D	glycolysis	plastid	AT2G21330	FBA1__fructose-bisphosphate aldolase 1	FBA1	0.606815	-0.71621	-0.348038	-0.302557	-0.102336	-0.0243921	0.195031	0.176495	0.669355	0.649717	0.90007	1
BnaC08g35820D	glycolysis	plastid	AT2G21330	FBA1__fructose-bisphosphate aldolase 1	FBA1	-0.508119	-1.22546	-0.516847	-0.792283	-1.85581	0.659745	0.416708	0.0641878	0.585098	0.203226	0.00129797	0.477516
BnaA08g16820D	glycolysis	plastid	AT4G38970	FBA2__fructose-bisphosphate aldolase 2	FBA2	0.364218	0.5566	-0.220491	0.446742	-0.107972	-0.359679	0.683583	0.590579	0.94022	0.629639	0.941949	0.86313
BnaC07g47470D	glycolysis	plastid	AT4G38970	FBA2__fructose-bisphosphate aldolase 2	FBA2	1.28287	0.134876	-0.17619	-0.365317	0.519564	0.0649285	0.0312619	0.905164	0.934359	0.652074	0.495584	1
BnaC03g60280D	glycolysis	plastid	AT4G38970	FBA2__fructose-bisphosphate aldolase 2	FBA2	1.27935	0.210894	-0.0536432	-0.339109	0.418959	0.238381	0.0577695	0.847545	1	0.70975	0.637569	0.930928
BnaA06g37230D	glycolysis	plastid	AT4G38970	FBA2__fructose-bisphosphate aldolase 2	FBA2	0.762464	0.109627	-0.00405188	-0.294194	-0.355464	0.26513	0.228161	0.925178	1	0.756903	0.713398	0.873607
BnaC01g00070D	glycolysis	plastid	AT4G38970	FBA2__fructose-bisphosphate aldolase 2	FBA2	1.65901	0.021814	-0.120921	-0.484896	-0.452895	0.0651196	0.00467163	1	0.951095	0.444635	0.479046	1
BnaAnng40850D	glycolysis	plastid	AT4G38970	FBA2__fructose-bisphosphate aldolase 2	FBA2	0.797631	-0.789401	-0.361975	-0.536034	-0.846806	-0.0580495	0.312204	0.477069	0.574855	0.556356	0.345818	1
BnaC02g33660D	glycolysis	plastid	AT2G01140	PDE345__Aldolase superfamily protein	FBA3	-0.352786	-0.181832	-0.116735	-0.0481446	-0.0567994	-0.121571	0.102618	0.512955	0.857656	0.89313	0.870042	0.861243
BnaA02g27140D	glycolysis	plastid	AT2G01140	PDE345__Aldolase superfamily protein	FBA3	-0.352686	0.0541692	-0.0764708	-0.247406	0.250387	0.117914	0.261976	0.921402	0.973192	0.488999	0.496986	0.932208
	glycolysis	plastid	AT5G03690	Aldolase superfamily protein	FBA4
BnaA09g43380D	glycolysis	plastid	AT2G21170	PDTPI_TIM__triosephosphate isomerase	TIM	-0.979344	-0.780025	-0.0175996	-0.71542	-0.545854	0.115898	6.96041e-05	0.00414232	1	0.00615871	0.0515564	0.90736
BnaC08g35990D	glycolysis	plastid	AT2G21170	PDTPI_TIM__triosephosphate isomerase	TIM	-1.03236	-0.79945	-0.63012	-0.664432	-0.836207	0.200529	0.0233954	0.128571	0.441464	0.19364	0.100159	0.913426
BnaA04g12000D	glycolysis	plastid	AT2G21170	PDTPI_TIM__triosephosphate isomerase	TIM	-0.102202	0.563571	1.01474	-0.163702	-0.222817	-0.158401	0.870453	0.30787	0.114856	0.808305	0.730049	0.949641
BnaC04g33690D	glycolysis	plastid	AT2G21170	PDTPI_TIM__triosephosphate isomerase	TIM	-0.129348	-0.241002	-0.0591506	0.00040129	-0.0412568	0.205491	0.642724	0.418051	0.972917	1	0.925756	0.723634
BnaC03g37820D	glycolysis	plastid	AT3G12780	PGK1__phosphoglycerate kinase 1	PGK1	-0.242779	-0.493345	-0.256536	-0.227882	0.131993	0.459744	0.447791	0.138835	0.643871	0.520966	0.750394	0.334208
BnaCnng23600D	glycolysis	plastid	AT3G12780	PGK1__phosphoglycerate kinase 1	PGK1	0.110638	-0.283593	-0.416151	0.00744041	-0.275152	-0.0515255	0.709928	0.34074	0.278365	1	0.34032	0.995815
BnaA03g32440D	glycolysis	plastid	AT3G12780	PGK1__phosphoglycerate kinase 1	PGK1	-0.773038	-0.626873	-0.308707	-0.751961	-1.78081	-0.277668	0.092437	0.248287	0.774691	0.179375	0.000822526	0.831133
BnaA01g30320D	glycolysis	plastid	AT3G12780	PGK1__phosphoglycerate kinase 1	PGK1	1.94273	0.0644305	0.841001	1.10834	-0.397136	0.454349	0.000506166	0.958691	0.364023	0.0560517	0.581268	0.739536
BnaC01g38270D	glycolysis	plastid	AT3G12780	PGK1__phosphoglycerate kinase 1	PGK1	1.06151	-0.630595	-0.24529	1.35547	-2.02724	-9.91704	0.615891	0.823135	1	0.583225	0.41786	0.00242037
	glycolysis	plastid	AT1G56190	Phosphoglycerate kinase family protein	PGK2
BnaAnng14300D	glycolysis	plastid	AT1G22170	Phosphoglycerate mutase family protein	PGM-a	-4.24377	-0.511048	-2.14366	-2.53643	0.200593	0.298294	2.76392e-08	0.615174	0.303261	0.0010595	0.869556	1
BnaC02g24750D	glycolysis	plastid	AT1G78050	PGM__phosphoglycerate/bisphosphoglycerate mutase	PGM-a	-0.232924	-0.106611	0.109503	-0.429788	-0.775712	-1.76191	0.61476	0.871512	0.978719	0.346331	0.0680871	0.0166412
BnaC06g38530D	glycolysis	plastid	AT1G78050	PGM__phosphoglycerate/bisphosphoglycerate mutase	PGM-a	0.626695	-0.168842	-0.240182	0.943057	0.119791	-0.398696	0.0109047	0.632268	0.669581	0.000114164	0.74039	0.415916
BnaA07g33900D	glycolysis	plastid	AT1G78050	PGM__phosphoglycerate/bisphosphoglycerate mutase	PGM-a	2.46387	1.14525	0.00898803	3.09368	1.63967	-0.505247	9.92871e-09	0.0171631	1	7.58562e-12	0.000650867	0.68839
BnaA02g18710D	glycolysis	plastid	AT1G78050	PGM__phosphoglycerate/bisphosphoglycerate mutase	PGM-a	-1.96216	-1.50847	-0.591121	-1.26324	-1.14872	-0.330229	3.28499e-08	6.89932e-05	0.542738	0.000598085	0.00267202	0.790143
BnaA07g31190D	glycolysis	plastid	AT1G74030	ENO1__enolase 1	ENO1	-0.479861	-0.560581	-0.30554	-0.128201	-0.214742	-0.538936	0.0579235	0.0411219	0.638922	0.707492	0.49634	0.302901
BnaC06g34880D	glycolysis	plastid	AT1G74030	ENO1__enolase 1	ENO1	-0.430904	-0.566916	0.163917	-0.253228	-0.422901	-0.647229	0.200667	0.118652	0.928552	0.51745	0.253424	0.340618
BnaA03g36910D	glycolysis	plastid	AT3G22960	PKP-ALPHA_PKP1__Pyruvate kinase family protein	PKP1	0.303022	-0.200711	-0.237064	-0.159302	0.403699	-0.453179	0.231975	0.527164	0.64675	0.695169	0.302732	0.720057
BnaC01g31270D	glycolysis	plastid	AT3G22960	PKP-ALPHA_PKP1__Pyruvate kinase family protein	PKP1	-0.230025	-1.01828	-0.382245	-0.122505	-0.861629	-0.614435	0.390498	2.54112e-05	0.352334	0.70989	0.00039733	0.0827571
BnaA01g24280D	glycolysis	plastid	AT3G22960	PKP-ALPHA_PKP1__Pyruvate kinase family protein	PKP1	0.214842	-0.632754	-0.35792	0.0488825	-1.36708	-2.91212	0.855764	0.596207	0.917777	0.996626	0.175838	0.0209302
BnaC03g43100D	glycolysis	plastid	AT3G22960	PKP-ALPHA_PKP1__Pyruvate kinase family protein	PKP1	-0.0527109	-0.556775	-0.0426359	-0.0730014	-0.432823	-0.208271	0.891378	0.0654628	1	0.86751	0.158968	0.774555
BnaC09g29010D	glycolysis	plastid	AT5G52920	PKP-BETA1_PKP1_PKP2__plastidic pyruvate kinase beta subunit 1	PKP2	-0.529985	-0.639969	-0.114388	-0.188192	-0.677595	-1.00654	0.0938992	0.0625861	0.933409	0.641984	0.0409057	0.0141348
BnaC02g44850D	glycolysis	plastid	AT5G52920	PKP-BETA1_PKP1_PKP2__plastidic pyruvate kinase beta subunit 1	PKP2	-0.123563	-0.704316	0.402215	-0.103127	-0.700595	-0.857994	0.734395	0.0246278	0.446261	0.812346	0.0227383	0.0330989
BnaA10g06350D	glycolysis	plastid	AT5G52920	PKP-BETA1_PKP1_PKP2__plastidic pyruvate kinase beta subunit 1	PKP2	0.494543	0.279852	-0.177001	0.402921	-0.164457	0.437493	0.473215	0.755386	0.990427	0.567777	0.877901	0.856723
BnaCnng37100D	glycolysis	plastid	AT5G52920	PKP-BETA1_PKP1_PKP2__plastidic pyruvate kinase beta subunit 1	PKP2	-0.275398	-1.15714	-0.0207146	-0.3697	-0.72591	-0.653116	0.487724	0.00135275	1	0.366049	0.0534793	0.276834
BnaC05g26030D	glycolysis	plastid	AT1G32440	PKp3__plastidial pyruvate kinase 3	PKP3	0.141924	0.719803	-0.235682	-0.00945534	-0.00157147	-0.0521931	0.895943	0.464764	0.959472	1	1	1
BnaA05g35800D	glycolysis	plastid	AT1G32440	PKp3__plastidial pyruvate kinase 3	PKP3	-0.939076	-1.70851	-0.635839	-0.787395	-0.837487	-0.220577	0.0075864	2.65789e-06	0.257442	0.0393038	0.0345821	0.839947
BnaC05g28630D	glycolysis	plastid	AT1G32440	PKp3__plastidial pyruvate kinase 3	PKP3	-0.520862	-0.619147	-0.111196	-0.477502	-0.66403	-0.123305	0.0273972	0.0161545	0.887147	0.0573187	0.00770616	0.8778
BnaC09g16990D	glycolysis	cytosol	AT5G42740	Sugar isomerase (SIS) family protein	PGI	-0.211826	-0.423486	0.0706805	-0.0672528	-0.396497	0.0368706	0.328504	0.0521	0.937748	0.822657	0.0637268	1
BnaC09g16980D	glycolysis	cytosol	AT5G42740	Sugar isomerase (SIS) family protein	PGI	-0.109223	-0.380791	-0.351613	0.0993052	-0.163507	0.124269	0.662466	0.101974	0.299848	0.728274	0.534535	0.848337
BnaA09g16190D	glycolysis	cytosol	AT5G42740	Sugar isomerase (SIS) family protein	PGI	0.620436	0.61356	-0.163549	0.911392	0.997625	0.349367	0.00990137	0.0196959	0.79557	0.000136612	4.12694e-05	0.472213
BnaC09g52860D	glycolysis	cytosol	AT5G51830	FRK1, FRUCTOKINASE 1	FRK1	-0.111341	-0.219116	0.158136	-0.121892	0.159638	0.201101	0.72586	0.514894	0.846552	0.730509	0.640644	0.78487
BnaA10g07720D	glycolysis	cytosol	AT5G51830	FRK1, FRUCTOKINASE 1	FRK1	-0.501003	-0.181301	0.487667	-0.255076	0.0765103	0.150329	0.0186758	0.527136	0.191984	0.304349	0.81605	0.838184
BnaC03g17470D	glycolysis	cytosol	AT2G31390	FRK1, FRK2, FRUCTOKINASE 1, FRUCTOKINASE 2	FRK2	2.09609	1.73047	0.293025	2.29917	1.78037	-0.0471871	2.43344e-06	0.000268117	0.817343	3.88568e-07	0.000137095	1
BnaA05g11350D	glycolysis	cytosol	AT2G31390	FRK1, FRK2, FRUCTOKINASE 1, FRUCTOKINASE 2	FRK2	-0.0566541	0.0074431	0.939046	-0.215707	-0.44186	-0.00535069	0.951324	1	0.368975	0.792542	0.540843	1
BnaC04g42400D	glycolysis	cytosol	AT2G31390	FRK1, FRK2, FRUCTOKINASE 1, FRUCTOKINASE 2	FRK2	-0.993513	-0.700636	-0.277532	-0.772177	-1.41034	0.0575537	0.000137753	0.0174316	0.733915	0.0046993	1.40758e-07	1
BnaA03g14420D	glycolysis	cytosol	AT2G31390	FRK1, FRK2, FRUCTOKINASE 1, FRUCTOKINASE 2	FRK2	3.04498	2.06807	0.0447078	2.89152	2.20994	0.420279	1.27011e-23	1.63399e-11	1	1.61445e-21	4.13206e-13	0.552157
BnaA04g18320D	glycolysis	cytosol	AT2G31390	FRK1, FRK2, FRUCTOKINASE 1, FRUCTOKINASE 2	FRK2	-1.36016	-1.02248	-0.249566	-1.29403	-1.38476	-0.0769091	1.40136e-05	0.00291098	0.883514	5.38257e-05	2.31256e-05	1
BnaC04g22930D	glycolysis	cytosol	AT2G31390	FRK1, FRK2, FRUCTOKINASE 1, FRUCTOKINASE 2	FRK2	0.879424	0.54488	0.164748	0.350335	0.0755677	0.0786638	0.00687347	0.163492	0.925058	0.381381	0.899804	1
BnaC03g12820D	glycolysis	cytosol	AT2G31390	FRK1, FRK2, FRUCTOKINASE 1, FRUCTOKINASE 2	FRK2	1.5571	0.958721	-0.064396	0.289913	0.226413	-2.11674	0.0732159	0.390797	1	0.821289	0.877468	0.729392
BnaC02g13870D	glycolysis	cytosol	AT2G31390	FRK1, FRK2, FRUCTOKINASE 1, FRUCTOKINASE 2	FRK2	-0.212654	-0.325026	0.988459	-0.337379	-0.459529	0.193084	0.506451	0.419844	0.229846	0.291955	0.181669	0.928556
BnaUnng01130D	glycolysis	cytosol	AT2G31390	FRK1, FRK2, FRUCTOKINASE 1, FRUCTOKINASE 2	FRK2	4.0852	2.63494	-1.61702	1.4262	1.5015	0.0801537	0.00039219	0.038463	0.438799	0.246946	0.237374	1
BnaCnng30740D	glycolysis	cytosol	AT2G31390	FRK1, FRK2, FRUCTOKINASE 1, FRUCTOKINASE 2	FRK2	1.48707	1.24073	-0.224845	1.76298	1.54202	-0.274373	6.93946e-05	0.00252375	0.91459	3.36025e-06	8.0956e-05	0.86403
	glycolysis	cytosol	AT4G10260	FRK4, FRK5, FRUCTOKINASE 4, FRUCTOKINASE 5	FRK4
	glycolysis	cytosol	AT1G06020	FRK3, FRK5, FRUCTOKINASE 3, FRUCTOKINASE 5	FRK5
BnaC05g04100D	glycolysis	cytosol	AT1G06030	FRK2, FRK6, FRUCTOKINASE 2, FRUCTOKINASE 6	FRK6	4.10008	0.312665	-0.0329201	5.18269	-1.59737	-3.6961	0.000278392	0.890011	1	9.15243e-06	0.210916	0.434101
BnaC04g23060D	glycolysis	cytosol	AT3G59480	FRK4, FRK7, FRUCTOKINASE 4, FRUCTOKINASE 7	FRK7	-1.67755	-1.96672	-0.303376	-1.44434	-1.76687	3.19327	3.22458e-06	2.25242e-07	0.962112	8.60323e-05	2.85695e-06	0.0610725
BnaC06g17380D	glycolysis	cytosol	AT3G59480	FRK4, FRK7, FRUCTOKINASE 4, FRUCTOKINASE 7	FRK7	-0.36526	-4.02491	0.980604	-0.957589	-3.03431	-5.22556	0.659262	9.41303e-07	0.609535	0.216903	7.71008e-05	0.0677446
BnaA04g01640D	glycolysis	cytosol	AT3G59480	FRK4, FRK7, FRUCTOKINASE 4, FRUCTOKINASE 7	FRK7	-1.47423	-2.08126	-4.05307	-1.2802	-1.91753	-4.14177	0.0128569	0.00121705	0.201774	0.0906645	0.00919069	0.276986
BnaC01g09280D	glycolysis	cytosol	AT4G29220	PFK1__phosphofructokinase 1	PFK1	-0.866867	-0.452549	0.304635	-0.588939	-0.421472	0.444229	0.000686523	0.134985	0.555626	0.0314604	0.155608	0.343101
BnaA01g07610D	glycolysis	cytosol	AT4G29220	PFK1__phosphofructokinase 1	PFK1	-0.880524	-0.516338	0.540387	-0.641363	-0.576552	0.461163	4.83675e-05	0.0366184	0.0766625	0.00529636	0.0151803	0.198201
BnaC07g20530D	glycolysis	cytosol	AT5G47810	PFK2__phosphofructokinase 2	PFK2	0.542644	0.841804	0.527069	0.605064	0.656637	0.250373	0.100582	0.0143496	0.448674	0.0789386	0.0576107	0.828336
BnaA06g35220D	glycolysis	cytosol	AT5G47810	PFK2__phosphofructokinase 2	PFK2	0.964656	1.05899	0.505582	0.875344	0.827555	0.256289	0.000409558	0.00024018	0.473879	0.00271342	0.00519157	0.815299
BnaAnng29210D	glycolysis	cytosol	AT4G26270	PFK3__phosphofructokinase 3	PFK3	7.16242	4.86851	-0.189102	6.38544	4.10883	-0.87558	2.41887e-24	3.42634e-13	1	1.54998e-20	3.02935e-10	0.83344
BnaC01g18320D	glycolysis	cytosol	AT4G26270	PFK3__phosphofructokinase 3	PFK3	6.4204	4.47712	-1.22302	6.2082	4.12024	0.136444	1.36763e-24	8.04588e-14	0.34884	2.39395e-23	2.98448e-12	1
BnaA01g15420D	glycolysis	cytosol	AT4G26270	PFK3__phosphofructokinase 3	PFK3	8.98257	9.33792	1.58333	4.52456	2.18021	-0.0697544	2.46961e-22	3.23756e-15	0.777527	1.28542e-09	0.00481618	1
BnaA01g04110D	glycolysis	cytosol	AT4G32840	PFK6__phosphofructokinase 6	PFK6	4.05567	2.92791	0.126638	4.13152	3.17357	0.239056	1.08434e-33	8.85647e-19	0.965155	1.39622e-34	9.77293e-22	0.910285
BnaC01g05570D	glycolysis	cytosol	AT4G32840	PFK6__phosphofructokinase 6	PFK6	4.49505	3.23577	-1.5121	4.51296	3.30766	-0.517215	2.0779e-37	3.65298e-21	0.00820798	1.91527e-37	5.69057e-22	0.59386
BnaA03g10690D	glycolysis	cytosol	AT5G56630	PFK7__phosphofructokinase 7	PFK7	-0.582175	-0.552876	0.107889	-0.0395279	-0.296458	-0.395032	0.171976	0.253987	0.973192	0.973807	0.572918	0.722133
BnaCnng46090D	glycolysis	cytosol	AT5G56630	PFK7__phosphofructokinase 7	PFK7	1.74079	-0.374939	2.53065	-0.055719	-0.0320914	-5.48931	0.382132	0.810272	0.748227	1	1	0.509427
BnaC03g47350D	glycolysis	cytosol	AT5G56630	PFK7__phosphofructokinase 7	PFK7	1.16454	-0.250913	0.399877	0.560928	0.122026	0.689403	0.320016	0.895689	0.934741	0.689399	0.958928	0.825134
BnaA06g03380D	glycolysis	cytosol	AT5G56630	PFK7__phosphofructokinase 7	PFK7	0.257415	1.0178	-0.0717103	-0.0689388	0.591555	-0.70948	0.853018	0.442305	1	0.993229	0.696595	0.865993
BnaC09g27470D	glycolysis	cytosol	AT5G56630	PFK7__phosphofructokinase 7	PFK7	1.38747	0.649387	-0.44124	0.920439	0.428142	-0.230262	0.000710012	0.198227	0.668517	0.0460867	0.432607	0.895703
BnaC02g36920D	glycolysis	cytosol	AT5G56630	PFK7__phosphofructokinase 7	PFK7	0.814337	0.605804	0.23566	0.889546	2.65487	-0.0127846	0.0451133	0.216909	0.875245	0.669223	0.184687	1
BnaC03g13370D	glycolysis	cytosol	AT5G56630	PFK7__phosphofructokinase 7	PFK7	-1.17056	-0.78687	0.117476	-0.933216	-0.284205	0.165743	0.081888	0.333617	1	0.199985	0.764289	0.986037
BnaAnng40390D	glycolysis	cytosol	AT5G56630	PFK7__phosphofructokinase 7	PFK7	0.911171	0.744662	0.111832	-0.011429	-0.00384414	-0.0146769	0.0381093	0.145921	0.979914	1	1	1
BnaC09g33200D	glycolysis	cytosol	AT5G56630	PFK7__phosphofructokinase 7	PFK7	-0.135079	-0.397358	0.096604	0.759159	0.531369	0.23714	0.706576	0.252324	0.9558	0.00960907	0.0937355	0.773096
BnaC02g12110D	glycolysis	cytosol	AT5G56630	PFK7__phosphofructokinase 7	PFK7	-0.0940041	-0.289804	0.163163	0.338765	0.828952	2.47063	0.891985	0.654084	0.992519	0.57282	0.0865304	0.172322
BnaCnng60300D	glycolysis	cytosol	AT5G56630	PFK7__phosphofructokinase 7	PFK7	0.868643	0.71865	-0.307399	0.770902	0.795829	-0.116321	0.00178296	0.022346	0.643474	0.00939178	0.00872316	0.945414
BnaA10g10800D	glycolysis	cytosol	AT5G56630	PFK7__phosphofructokinase 7	PFK7	-0.250614	-0.635119	0.233866	0.287579	0.225107	0.161683	0.500733	0.0799534	0.823451	0.464113	0.596699	0.915508
BnaC08g19600D	glycolysis	cytosol	AT1G20950	Phosphofructokinase family protein	AtPFPA1	-0.980398	-0.698908	-0.399755	-0.666147	-0.880585	-0.659	0.000604856	0.0320158	0.501625	0.0308163	0.0045034	0.184907
BnaC02g28310D	glycolysis	cytosol	AT1G20950	Phosphofructokinase family protein	AtPFPA1	-0.406892	1.72688	-0.191738	-0.193123	0.771559	0.563214	0.591897	0.044853	0.94452	0.937789	0.687697	0.67782
BnaA08g21540D	glycolysis	cytosol	AT1G20950	Phosphofructokinase family protein	AtPFPA1	-1.45682	-1.01484	-0.538893	-1.07194	-0.829078	-0.224896	0.000299801	0.0250782	0.490744	0.0116888	0.070374	0.873713
BnaA05g12130D	glycolysis	cytosol	AT1G20950	Phosphofructokinase family protein	AtPFPA1	-0.82885	-0.298738	0.621661	-0.771111	-0.120768	-0.10803	0.0949139	0.654445	0.708293	0.104979	0.872935	1
BnaA05g12140D	glycolysis	cytosol	AT1G20950	Phosphofructokinase family protein	AtPFPA1	-0.191906	-0.691953	0.0522095	-0.426658	0.623233	-2.17939	0.896125	0.68507	1	0.754639	0.655544	0.477005
BnaC02g17950D	glycolysis	cytosol	AT1G20950	Phosphofructokinase family protein	AtPFPA1	-1.16746	-0.137053	-0.505706	0.329743	1.33938	-0.00858916	0.0810332	0.895354	0.720932	0.747684	0.0932777	1
BnaC05g50320D	glycolysis	cytosol	AT1G20950	Phosphofructokinase family protein	AtPFPA1	-1.8667	-1.08561	-0.100523	-1.59035	-1.2663	-0.277266	5.38893e-12	0.000208631	0.940162	7.01645e-09	8.9724e-06	0.702667
BnaA06g38560D	glycolysis	cytosol	AT1G20950	Phosphofructokinase family protein	AtPFPA1	-1.65904	-0.918753	-0.278487	-1.33613	-0.928601	-0.156862	4.4957e-10	0.00173455	0.641776	8.87429e-07	0.00126027	0.86981
BnaC06g37390D	glycolysis	cytosol	AT1G76550	Phosphofructokinase family protein	AtPFPA2	4.05905	2.32402	-0.0222871	3.97024	2.47054	0.18407	1.24834e-30	2.20108e-11	1	1.91624e-29	8.49958e-13	0.881044
BnaA07g32860D	glycolysis	cytosol	AT1G76550	Phosphofructokinase family protein	AtPFPA2	5.04194	2.81408	0.0384393	4.95884	2.87351	0.0910513	5.71027e-20	1.91899e-07	1	2.55266e-19	7.29531e-08	1
BnaC06g13670D	glycolysis	cytosol	AT1G12000	Phosphofructokinase family protein	AtPFPB1	0.333543	0.426951	0.168329	0.0486287	0.17615	0.349881	0.262115	0.188739	0.865275	0.928204	0.637569	0.627346
BnaA06g08370D	glycolysis	cytosol	AT1G12000	Phosphofructokinase family protein	AtPFPB1	-0.947311	-0.752789	0.346683	-1.05776	-1.38279	-1.14376	0.0802096	0.235475	0.804139	0.0602041	0.0142395	0.196355
BnaC08g41630D	glycolysis	cytosol	AT1G12000	Phosphofructokinase family protein	AtPFPB1	-0.483752	-0.144269	-0.0804647	-0.693593	-0.484954	0.494707	0.179401	0.787035	0.987152	0.0640828	0.249484	0.538448
BnaC07g09630D	glycolysis	cytosol	AT1G12000	Phosphofructokinase family protein	AtPFPB1	0.979523	0.517981	0.657536	1.16533	1.06651	-0.255325	0.000308833	0.114944	0.145406	2.38688e-05	0.000206993	0.764267
BnaC05g09740D	glycolysis	cytosol	AT1G12000	Phosphofructokinase family protein	AtPFPB1	-1.19555	-0.837286	0.0324064	-1.06355	-0.848988	-0.128875	6.8448e-07	0.00155645	1	1.67002e-05	0.00104298	0.890544
BnaC09g22950D	glycolysis	cytosol	AT4G04040	MEE51__Phosphofructokinase family protein	AtPFPB2	0.485031	0.629657	0.0605576	0.432418	0.25443	0.231656	0.0349191	0.00976267	0.971896	0.0766356	0.361015	0.668064
BnaC08g01990D	glycolysis	cytosol	AT1G07110	ATF2KP_F2KP_FKFBP__fructose-2,6-bisphosphatase	PF2K	-0.532004	-0.608448	-0.215681	-1.01581	-0.881463	-0.0327117	0.0800518	0.0685779	0.756948	0.000807274	0.00578532	1
BnaAnng15770D	glycolysis	cytosol	AT1G07110	ATF2KP_F2KP_FKFBP__fructose-2,6-bisphosphatase	PF2K	0.0102168	-0.621707	0.0577805	-0.0153684	-0.554059	-1.07996	1	0.393195	1	1	0.432455	0.261463
BnaC05g04910D	glycolysis	cytosol	AT1G07110	ATF2KP_F2KP_FKFBP__fructose-2,6-bisphosphatase	PF2K	0.788217	0.341888	-0.0746643	-0.0204198	0.0159907	0.00183138	0.000191616	0.189159	0.948049	0.977376	0.984236	1
BnaA10g04550D	glycolysis	cytosol	AT1G07110	ATF2KP_F2KP_FKFBP__fructose-2,6-bisphosphatase	PF2K	1.0308	0.505402	0.0597265	0.646408	0.309826	0.160567	2.919e-08	0.0178835	0.9599	0.00099921	0.170403	0.758593
BnaC08g45130D	glycolysis	cytosol	AT1G07110	ATF2KP_F2KP_FKFBP__fructose-2,6-bisphosphatase	PF2K	-0.686015	-1.29102	-0.115768	-0.0191166	-0.426645	0.799671	0.486046	0.215375	1	1	0.732977	0.710443
BnaA08g28830D	glycolysis	cytosol	AT1G07110	ATF2KP_F2KP_FKFBP__fructose-2,6-bisphosphatase	PF2K	-0.625666	-0.326189	-0.392915	-0.757011	-0.716035	0.157758	0.0233168	0.345899	0.41469	0.00727726	0.0138733	0.853543
BnaA01g15640D	glycolysis	cytosol	AT4G26530	Aldolase superfamily protein	FBA5	-1.93805	-1.00552	0.46675	-1.13791	-1.10859	0.615408	0.0162546	0.474517	0.585401	0.352655	0.382237	0.454413
BnaAnng31970D	glycolysis	cytosol	AT2G36460	Aldolase superfamily protein	FBA6	7.51189	4.64794	-0.46233	7.54039	5.55997	0.379633	2.44702e-26	7.97299e-13	0.819886	2.32885e-26	8.24649e-17	0.859171
BnaAnng07310D	glycolysis	cytosol	AT2G36460	Aldolase superfamily protein	FBA6	7.68212	4.39285	0.270372	7.14227	5.59329	0.599303	8.11045e-14	4.58184e-06	0.968398	2.08694e-12	1.27517e-08	0.834178
	glycolysis	cytosol	AT4G26520	Aldolase superfamily protein	FBA7
BnaC06g14270D	glycolysis	cytosol	AT3G52930	Aldolase superfamily protein	FBA8	2.47114	1.99511	-0.240414	2.65575	2.22796	-0.169579	2.63959e-15	5.23456e-10	0.763297	3.3767e-17	2.57498e-12	0.880581
BnaC08g24100D	glycolysis	cytosol	AT3G52930	Aldolase superfamily protein	FBA8	-0.595855	-0.0552969	-0.514746	-0.100277	0.00794705	-0.51359	0.0293547	0.912775	0.241794	0.805191	1	0.291069
BnaA09g33290D	glycolysis	cytosol	AT3G52930	Aldolase superfamily protein	FBA8	0.827169	0.780729	-0.461789	1.5047	1.01082	-0.298296	0.0025844	0.00920683	0.331713	2.63124e-08	0.00039174	0.649349
BnaCnng50220D	glycolysis	cytosol	AT3G52930	Aldolase superfamily protein	FBA8	3.21345	2.39525	-0.247217	3.42748	2.7906	-0.139875	2.42256e-25	1.02175e-14	0.74954	3.54473e-28	1.74132e-19	0.917349
BnaA04g05120D	glycolysis	cytosol	AT3G52930	Aldolase superfamily protein	FBA8	2.79956	1.85264	-0.265661	2.8691	2.03709	0.0978111	7.43298e-14	1.82982e-06	0.790768	2.89414e-14	9.86662e-08	0.984508
BnaA07g15900D	glycolysis	cytosol	AT3G52930	Aldolase superfamily protein	FBA8	2.92852	2.82285	-0.0243454	2.8144	2.7911	0.422358	2.09287e-14	5.13027e-13	1	2.51662e-13	8.27472e-13	0.638831
BnaA04g03590D	glycolysis	cytosol	AT3G55440	ATCTIMC_CYTOTPI_TPI__triosephosphate isomerase	TIMc	0.501118	0.0937041	0.144702	-0.134588	-0.311067	0.0771541	0.057239	0.821962	0.855197	0.728374	0.360127	0.981344
BnaA04g03580D	glycolysis	cytosol	AT3G55440	ATCTIMC_CYTOTPI_TPI__triosephosphate isomerase	TIMc	0.411469	0.0866158	0.135698	-0.0487024	-0.211139	-0.112081	0.105163	0.827128	0.859041	0.912473	0.497145	0.909607
BnaC04g25470D	glycolysis	cytosol	AT3G55440	ATCTIMC_CYTOTPI_TPI__triosephosphate isomerase	TIMc	0.140088	0.499179	0.0793598	0.21755	0.419883	-0.106568	0.556135	0.0229912	0.924744	0.364906	0.0566114	0.879463
BnaA09g35020D	glycolysis	cytosol	AT3G55440	ATCTIMC_CYTOTPI_TPI__triosephosphate isomerase	TIMc	-0.418109	1.07604	0.219186	-1.48929	0.419815	1.04547	0.57438	0.136562	0.980066	0.0240913	0.604722	0.532097
BnaC04g25490D	glycolysis	cytosol	AT3G55440	ATCTIMC_CYTOTPI_TPI__triosephosphate isomerase	TIMc	-0.271581	-0.25548	0.0624359	-0.0459477	-0.267581	0.194705	0.228813	0.329094	0.960472	0.900416	0.284643	0.716795
BnaA04g06110D	glycolysis	cytosol	AT3G55440	ATCTIMC_CYTOTPI_TPI__triosephosphate isomerase	TIMc	-0.0884858	2.32882	2.95904	-0.0614598	-3.97992	-5.89681	0.949149	0.482414	0.660166	1	0.244271	0.39314
BnaC04g14040D	glycolysis	cytosol	AT3G55440	ATCTIMC_CYTOTPI_TPI__triosephosphate isomerase	TIMc	0.0678727	0.116102	2.56219	0.0872115	0.030395	-0.0861724	0.915698	0.98764	0.500984	1	1	1
BnaC08g40330D	glycolysis	cytosol	AT3G04120	GAPC_GAPC-1_GAPC1__glyceraldehyde-3-phosphate dehydrogenase C subunit 1	GAPC-1	2.12208	1.17265	0.41318	2.12029	0.543263	0.360986	1.93457e-08	0.00491303	0.616495	3.60522e-08	0.240194	0.716385
BnaA05g33200D	glycolysis	cytosol	AT3G04120	GAPC_GAPC-1_GAPC1__glyceraldehyde-3-phosphate dehydrogenase C subunit 1	GAPC-1	-1.0439	-1.09591	0.485931	-0.844636	-0.68743	-1.73256	0.00023717	0.000320283	0.34996	0.00876437	0.0616358	0.0333459
BnaA01g33660D	glycolysis	cytosol	AT3G04120	GAPC_GAPC-1_GAPC1__glyceraldehyde-3-phosphate dehydrogenase C subunit 1	GAPC-1	-0.571829	-0.273395	-0.100464	-0.0776971	0.465676	0.751189	0.279023	0.700301	0.991062	0.936586	0.44461	0.427131
BnaC03g33610D	glycolysis	cytosol	AT3G04120	GAPC_GAPC-1_GAPC1__glyceraldehyde-3-phosphate dehydrogenase C subunit 1	GAPC-1	-1.82847	-1.47503	-0.290165	-1.1924	-1.09358	0.00821205	1.09092e-08	1.35452e-05	0.713539	0.000354252	0.00158754	1
BnaC08g15900D	glycolysis	cytosol	AT3G04120	GAPC_GAPC-1_GAPC1__glyceraldehyde-3-phosphate dehydrogenase C subunit 1	GAPC-1	1.44407	1.58858	-0.00564633	1.79054	1.91966	0.0202258	0.000101192	5.67193e-05	1	1.98304e-06	6.08668e-07	1
BnaA08g24270D	glycolysis	cytosol	AT3G04120	GAPC_GAPC-1_GAPC1__glyceraldehyde-3-phosphate dehydrogenase C subunit 1	GAPC-1	1.52667	0.823711	-1.25456	1.51656	1.53345	-0.110699	0.00429237	0.19904	0.111187	0.00599152	0.00731833	0.999408
BnaC01g40210D	glycolysis	cytosol	AT3G04120	GAPC_GAPC-1_GAPC1__glyceraldehyde-3-phosphate dehydrogenase C subunit 1	GAPC-1	-3.02993	-4.88241	0.128884	-0.286548	-4.19267	-7.284	0.137097	0.0375598	1	0.932121	0.0701583	0.0207332
BnaA03g28480D	glycolysis	cytosol	AT3G04120	GAPC_GAPC-1_GAPC1__glyceraldehyde-3-phosphate dehydrogenase C subunit 1	GAPC-1	-0.770096	-1.20404	-0.224861	-1.9521	-1.753	0.961373	0.310517	0.139108	0.956194	0.0192962	0.0442767	0.834692
BnaC05g47450D	glycolysis	cytosol	AT3G04120	GAPC_GAPC-1_GAPC1__glyceraldehyde-3-phosphate dehydrogenase C subunit 1	GAPC-1	-1.70918	-1.0892	0.244164	-1.07178	-0.797898	-0.222246	2.96897e-08	0.00125667	0.759975	0.000854633	0.0205148	0.815456
BnaA09g46260D	glycolysis	cytosol	AT1G13440	GAPC-2_GAPC2__glyceraldehyde-3-phosphate dehydrogenase C2	GAPC-2	1.6138	1.03751	0.617534	1.84762	1.6225	0.328215	1.21796e-05	0.0121137	0.354787	8.3009e-07	2.9784e-05	0.740162
BnaC05g09880D	glycolysis	cytosol	AT1G13440	GAPC-2_GAPC2__glyceraldehyde-3-phosphate dehydrogenase C2	GAPC-2	2.57192	2.37335	-0.35359	2.97475	2.89174	-0.00976551	1.73976e-11	2.14831e-09	0.680437	1.89166e-14	1.94106e-13	1
BnaA06g08510D	glycolysis	cytosol	AT1G13440	GAPC-2_GAPC2__glyceraldehyde-3-phosphate dehydrogenase C2	GAPC-2	2.0102	2.61498	-0.210217	2.17321	2.13657	-0.872798	0.000196283	5.27933e-06	0.926838	8.39716e-05	0.000190009	0.402191
BnaC06g39910D	glycolysis	cytosol	AT1G79550	PGK__phosphoglycerate kinase	PGK	-0.492447	0.00101889	-0.110917	-0.216668	0.0538737	0.0212702	0.00924662	1	0.848268	0.336334	0.864643	1
BnaC02g46710D	glycolysis	cytosol	AT1G79550	PGK__phosphoglycerate kinase	PGK	-0.539226	-0.401321	-0.306689	-0.114721	-0.231075	0.0497387	0.0217861	0.141368	0.487026	0.732937	0.438825	0.998845
BnaA07g20290D	glycolysis	cytosol	AT1G79550	PGK__phosphoglycerate kinase	PGK	-1.78276	-0.743612	0.098605	-2.63014	-1.67239	-1.86031	0.0144307	0.425103	1	0.00401414	0.0507483	0.58685
BnaC06g19780D	glycolysis	cytosol	AT1G79550	PGK__phosphoglycerate kinase	PGK	-0.37151	-0.0339671	-0.210953	-0.332987	-0.788546	-0.0512947	0.654687	0.991569	0.966135	0.71166	0.328271	1
BnaA07g34980D	glycolysis	cytosol	AT1G79550	PGK__phosphoglycerate kinase	PGK	-0.417116	-0.0526224	0.309164	-0.372758	-1.19525	-1.28619	0.573753	0.974406	0.881995	0.656161	0.0912561	0.230536
BnaC06g19770D	glycolysis	cytosol	AT1G79550	PGK__phosphoglycerate kinase	PGK	-0.532148	-1.29141	-0.506852	-0.326981	-1.164	-0.190868	0.118472	0.000115828	0.396914	0.405053	0.000509412	0.863777
BnaA02g19260D	glycolysis	cytosol	AT1G79550	PGK__phosphoglycerate kinase	PGK	-0.861326	-0.311331	-0.175877	-0.520427	0.0155382	0.571723	0.0440179	0.592447	0.914241	0.284196	1	0.517629
BnaC01g25490D	glycolysis	cytosol	AT4G09520	Cofactor-independent phosphoglycerate mutase	PGM-b	-0.821248	0.302081	-0.621567	-0.475017	-0.492464	-0.157461	0.0357663	0.581317	0.395324	0.29014	0.289119	0.925608
BnaA08g26140D	glycolysis	cytosol	AT1G09780	iPGAM1__Phosphoglycerate mutase, 2,3-bisphosphoglycerate-independent	IPGAM1	-1.80591	-0.844239	-1.14216	-1.2253	-0.945766	-0.27275	3.53261e-08	0.0227499	0.00737644	0.000292723	0.00803892	0.760582
BnaC08g13860D	glycolysis	cytosol	AT1G09780	iPGAM1__Phosphoglycerate mutase, 2,3-bisphosphoglycerate-independent	IPGAM1	-1.25692	-0.820005	-0.87528	-0.993399	-0.842369	-0.112302	3.12262e-05	0.0154297	0.0354627	0.00160055	0.0106845	0.949914
BnaC05g43970D	glycolysis	cytosol	AT3G08590	iPGAM2__Phosphoglycerate mutase, 2,3-bisphosphoglycerate-independent	IPGAM2	-0.180474	-0.699783	-0.367459	0.00179582	-0.560708	0.0782296	0.543405	0.00961397	0.419318	1	0.0396567	0.965937
BnaA05g29640D	glycolysis	cytosol	AT3G08590	iPGAM2__Phosphoglycerate mutase, 2,3-bisphosphoglycerate-independent	IPGAM2	-0.205332	-1.4182	-0.134998	-0.310521	-1.10234	0.0389725	0.564006	3.02348e-06	0.900597	0.393548	0.000352949	1
BnaA05g34310D	glycolysis	cytosol	AT2G36530	ENO2_LOS2__Enolase	ENO2	-0.0129514	-0.269013	-0.607475	-0.187943	-0.0551954	0.310022	0.996683	0.706056	0.575729	0.809271	0.967213	0.879626
BnaA05g07770D	glycolysis	cytosol	AT2G36530	ENO2_LOS2__Enolase	ENO2	2.31595	1.27332	-0.521809	2.11281	1.28286	-0.0153561	3.7964e-20	1.58323e-06	0.205722	6.66238e-17	1.04673e-06	1
BnaAnng31890D	glycolysis	cytosol	AT2G36530	ENO2_LOS2__Enolase	ENO2	-0.203428	0.159723	0.395226	-0.276824	0.0329332	-0.0894798	0.698605	0.806764	0.606566	0.624255	0.979679	0.9863
BnaC03g20200D	glycolysis	cytosol	AT2G36530	ENO2_LOS2__Enolase	ENO2	-1.54963	-1.95388	-1.25333	-1.36301	-1.56944	-0.520374	1.53687e-07	1.18455e-10	0.000726161	7.90077e-06	4.02794e-07	0.380162
BnaA07g02350D	glycolysis	cytosol	AT2G36530	ENO2_LOS2__Enolase	ENO2	-0.196641	0.504089	-0.150729	0.76837	0.38507	0.451201	0.917084	0.793669	1	0.624864	0.840415	0.944319
BnaAnng30290D	glycolysis	cytosol	AT2G36530	ENO2_LOS2__Enolase	ENO2	-0.0129511	-0.269014	-0.607474	-0.187944	-0.0551927	0.310023	0.996683	0.706056	0.575729	0.809271	0.967213	0.879626
BnaAnng32300D	glycolysis	cytosol	AT2G36530	ENO2_LOS2__Enolase	ENO2	0.192624	0.583944	0.205929	-0.237276	0.426728	0.759121	0.896691	0.695373	0.996619	0.901734	0.797236	0.817181
BnaA07g17450D	glycolysis	cytosol	AT2G36530	ENO2_LOS2__Enolase	ENO2	-0.0129512	-0.269013	-0.607474	-0.187944	-0.0551935	0.310023	0.996683	0.706056	0.575729	0.809271	0.967213	0.879626
BnaA03g16750D	glycolysis	cytosol	AT2G36530	ENO2_LOS2__Enolase	ENO2	-0.632628	-0.337045	-0.399049	-0.20757	-0.527628	-0.457918	0.0687404	0.444556	0.559087	0.642961	0.17357	0.514856
BnaC04g08780D	glycolysis	cytosol	AT2G36530	ENO2_LOS2__Enolase	ENO2	0.818601	0.0882641	-0.0927675	1.8612	1.57943	-0.17342	0.0824811	0.91813	0.994152	3.98014e-05	0.000767207	0.940331
BnaC06g31740D	glycolysis	cytosol	AT2G36530	ENO2_LOS2__Enolase	ENO2	0.321179	0.855443	0.267491	0.0903132	0.151728	-0.271166	0.380263	0.0175631	0.769901	0.864823	0.750255	0.780665
BnaAnng21140D	glycolysis	cytosol	AT2G36530	ENO2_LOS2__Enolase	ENO2	0.868715	0.896626	-0.551413	1.40481	1.14351	-0.0787581	0.00161784	0.00249135	0.203733	2.74164e-07	5.63951e-05	0.976902
BnaA05g12480D	glycolysis	cytosol	AT2G29560	ENOC__cytosolic enolase	ENO3	-0.479771	-0.215778	-0.111528	-0.314205	-0.224052	-0.0645159	0.015065	0.398243	0.880357	0.161329	0.368076	0.976069
BnaC04g54450D	glycolysis	cytosol	AT2G29560	ENOC__cytosolic enolase	ENO3	-0.35507	-0.300806	-0.455974	-0.0050293	-0.11193	-0.132254	0.0768537	0.197019	0.140593	1	0.681572	0.835051
BnaA09g52310D	glycolysis	cytosol	AT5G63680	Pyruvate kinase family protein	PK	-1.57694	-2.22579	0.20375	-1.08751	-2.14231	0.796188	0.00167479	5.12915e-05	0.924237	0.0452837	0.000107425	0.427504
BnaA09g52300D	glycolysis	cytosol	AT5G63680	Pyruvate kinase family protein	PK	-0.933489	-1.79012	0.188528	-0.218883	-1.68009	1.2038	0.176696	0.0136484	0.965635	0.831474	0.0271269	0.30653
BnaC09g06050D	glycolysis	cytosol	AT5G63680	Pyruvate kinase family protein	PK	-0.934108	-0.285875	0.274499	-0.638681	-0.7043	0.399926	0.040298	0.66672	0.913497	0.342525	0.26413	0.839381
BnaA06g22820D	glycolysis	cytosol	AT5G63680	Pyruvate kinase family protein	PK	-1.02906	0.314506	-0.183348	-2.07643	0.0600163	-0.0265752	7.3779e-06	0.28758	0.801287	5.84577e-19	0.886644	1
BnaC03g50680D	glycolysis	cytosol	AT5G63680	Pyruvate kinase family protein	PK	-0.211073	0.404825	-0.251723	0.0464489	0.513611	0.199358	0.341431	0.072268	0.638434	0.892612	0.0149382	0.747614
BnaC02g42660D	glycolysis	cytosol	AT5G63680	Pyruvate kinase family protein	PK	-0.847312	1.30401	4.34284	1.04628	2.22602	-4.44431	0.128648	0.0223741	0.134656	0.0711452	1.74294e-05	0.191357
BnaC09g06060D	glycolysis	cytosol	AT5G63680	Pyruvate kinase family protein	PK	-0.797945	-0.67682	0.283469	-0.543089	-1.33711	0.0792992	0.0758598	0.202726	0.869652	0.324047	0.00923004	1
BnaA03g10910D	glycolysis	cytosol	AT5G56350	Pyruvate kinase family protein	PK	0.226583	0.803181	0.838942	2.4018	1.37324	-0.410419	0.70556	0.155787	0.308969	5.61554e-07	0.00697915	0.749099
BnaCnng14000D	glycolysis	cytosol	AT5G56350	Pyruvate kinase family protein	PK	2.56154	2.24705	-0.259821	2.67345	2.6322	0.00837023	2.46102e-07	2.16346e-05	0.877283	1.20932e-07	3.93297e-07	1
BnaC03g13590D	glycolysis	cytosol	AT5G56350	Pyruvate kinase family protein	PK	2.06818	1.02207	-0.00830311	2.12751	1.38182	-0.140993	2.55509e-08	0.014238	1	1.59825e-08	0.000462668	0.950435
BnaA10g10590D	glycolysis	cytosol	AT5G56350	Pyruvate kinase family protein	PK	2.90697	2.69435	-0.107508	3.22634	3.22175	0.640867	2.32632e-08	8.75861e-07	0.999947	1.21173e-09	3.13836e-09	0.603278
BnaA03g52820D	glycolysis	cytosol	AT5G56350	Pyruvate kinase family protein	PK	3.03039	2.37362	-0.71193	2.39586	2.4331	0.240054	2.16786e-06	0.000731004	0.782226	0.000164421	0.000258328	0.969259
BnaA10g00550D	glycolysis	cytosol	AT5G56350	Pyruvate kinase family protein	PK	0.0466391	-0.284057	0.759386	-0.140318	0.182019	0.937843	0.95354	0.679403	0.407634	0.855912	0.805296	0.414306
BnaC09g47410D	glycolysis	cytosol	AT5G08570	Pyruvate kinase family protein	PK	0.318381	1.51922	-0.197436	0.924314	1.92445	-0.142207	0.266531	5.80859e-09	0.82514	0.000406288	4.51684e-14	0.905243
BnaA10g22870D	glycolysis	cytosol	AT5G08570	Pyruvate kinase family protein	PK	0.718269	1.42855	-0.304416	1.23637	1.71724	-0.00670794	0.0384923	4.4618e-05	0.746296	0.000288629	5.08566e-07	1
BnaA03g02560D	glycolysis	cytosol	AT5G08570	Pyruvate kinase family protein	PK	0.400495	0.23827	-0.0963331	-0.798857	-0.427453	0.0175282	0.0817463	0.406387	0.907056	0.000831897	0.112784	1
BnaC03g03680D	glycolysis	cytosol	AT5G08570	Pyruvate kinase family protein	PK	0.00189615	0.00104322	0.380793	0.188718	0.0300718	0.219403	1	1	0.874318	0.877995	1	0.970798
	glycolysis	cytosol	AT3G55650	Pyruvate kinase family protein	PK
	glycolysis	cytosol	AT3G55810	Pyruvate kinase family protein	PK
	glycolysis	cytosol	AT4G26390	Pyruvate kinase family protein	PK
BnaC04g23180D	glycolysis	cytosol	AT3G25960	Pyruvate kinase family protein	PK	0.634905	0.136276	0.646735	-0.0798773	-0.113001	-0.500562	0.0219919	0.7473	0.20699	0.830282	0.74632	0.332106
BnaC04g22280D	glycolysis	cytosol	AT3G25960	Pyruvate kinase family protein	PK	1.10231	0.876861	0.680896	-0.520872	-0.00440703	0.767229	0.118559	0.321503	0.671392	0.764217	1	0.859422
BnaC04g22290D	glycolysis	cytosol	AT3G25960	Pyruvate kinase family protein	PK	0.617485	0.446022	0.584123	0.00385067	0.13071	-0.0137515	0.0941588	0.318914	0.376107	1	0.83465	1
	glycolysis	cytosol	AT3G04050	Pyruvate kinase family protein	PK
BnaCnng32880D	glycolysis	cytosol	AT3G52990	Pyruvate kinase family protein	PK	1.95096	0.851887	-0.0473134	2.09101	1.09806	-0.112836	2.89352e-10	0.0149804	1	2.24923e-11	0.000941415	0.954555
BnaA09g33340D	glycolysis	cytosol	AT3G52990	Pyruvate kinase family protein	PK	-1.2473	-0.262417	-0.107707	-0.867546	0.00129349	0.0702899	6.24065e-10	0.325737	0.879323	3.38775e-05	1	0.960031
BnaCnng24100D	glycolysis	cytosol	AT3G52990	Pyruvate kinase family protein	PK	-0.0739609	0.0891619	-0.169198	0.141624	-0.238101	0.278762	0.897867	0.907642	0.899175	0.823973	0.680873	0.800671
BnaC01g30390D	glycolysis	cytosol	AT3G52990	Pyruvate kinase family protein	PK	0.508169	0.0169141	1.0309	-0.150754	-0.750142	-0.238783	0.708164	1	0.570781	0.90295	0.358316	0.929976
BnaA04g05070D	glycolysis	cytosol	AT3G52990	Pyruvate kinase family protein	PK	1.52636	1.05987	-0.45109	0.0711347	-0.0210945	-0.1929	2.31137e-06	0.00305177	0.48835	0.906569	0.990019	0.867306
BnaC08g24180D	glycolysis	cytosol	AT3G52990	Pyruvate kinase family protein	PK	-0.749059	-0.165404	-0.123023	-0.339801	-0.0279549	0.197282	0.00362495	0.659798	0.891343	0.259081	0.965063	0.784969
BnaC06g14360D	glycolysis	cytosol	AT3G52990	Pyruvate kinase family protein	PK	3.61281	2.41937	-0.0658855	3.66383	2.45336	0.161728	1.55409e-10	3.86689e-05	1	1.41342e-10	2.26206e-05	0.972028
BnaA07g15940D	glycolysis	cytosol	AT3G52990	Pyruvate kinase family protein	PK	2.15055	1.39484	-0.149099	2.79261	1.67758	-0.106528	3.39425e-06	0.00638949	0.954009	3.9615e-09	0.000692537	0.99478
BnaC01g42190D	glycolysis	cytosol	AT2G36580	Pyruvate kinase family protein	PK	-0.00014567	0.00030385	0.00503652	-3.55075	-1.68629	2.52507	1	1	1	0.727082	0.798673	0.869751
BnaA03g43000D	fermentation	cytosol	AT4G17260	Lactate/malate dehydrogenase family protein	LDH	5.8374	3.69811	0.0838622	5.96997	4.50407	-0.0876814	1.94676e-36	1.97204e-17	0.997694	1.46111e-37	3.1932e-24	1
BnaA01g17800D	fermentation	cytosol	AT4G17260	Lactate/malate dehydrogenase family protein	LDH	7.95602	6.66749	0.803389	8.28148	6.49229	1.73174	3.1106e-14	1.35196e-10	0.792256	8.26392e-15	1.57428e-10	0.544701
BnaC01g21080D	fermentation	cytosol	AT4G17260	Lactate/malate dehydrogenase family protein	LDH	6.88944	5.66195	-0.643455	6.7283	5.41832	-1.47951	2.7689e-19	6.38242e-14	0.911959	9.8808e-19	2.10141e-13	0.553405
BnaC07g34250D	fermentation	cytosol	AT4G17260	Lactate/malate dehydrogenase family protein	LDH	5.75093	4.00608	0.108621	5.51489	3.96872	0.00554751	3.78134e-46	6.46407e-26	0.968479	2.4548e-43	1.16866e-25	1
BnaC09g40570D	fermentation	cytosol	AT5G17380	Thiamine pyrophosphate dependent pyruvate decarboxylase family protein	PDC	0.876457	0.157762	0.213605	0.190138	-0.00526129	0.131988	3.68667e-05	0.611441	0.661321	0.488529	1	0.85765
BnaA10g17340D	fermentation	cytosol	AT5G17380	Thiamine pyrophosphate dependent pyruvate decarboxylase family protein	PDC	0.195815	-0.00957348	-0.23832	-0.272389	-0.0807469	-0.0731681	0.518885	0.997435	0.676432	0.382604	0.847297	0.977875
BnaCnng03960D	fermentation	cytosol	AT4G33070	Thiamine pyrophosphate dependent pyruvate decarboxylase family protein	PDC1	8.69027	7.53314	0.116217	9.49629	7.79527	-0.215884	3.27258e-34	1.92839e-27	1	3.30447e-38	4.69954e-29	0.95732
BnaA10g09270D	fermentation	cytosol	AT5G54960	PDC2__pyruvate decarboxylase-2	PDC2	7.87331	5.68938	0.570363	7.81248	5.78821	1.26236	1.43723e-48	1.59906e-30	0.521036	4.81862e-48	2.66708e-31	0.0568037
BnaC09g31460D	fermentation	cytosol	AT5G54960	PDC2__pyruvate decarboxylase-2	PDC2	6.72263	4.59627	0.39516	6.61486	4.49572	0.933731	1.29007e-64	2.02621e-36	0.627765	4.76726e-63	3.4159e-35	0.107913
	fermentation	cytosol	AT5G01330	PDC3__pyruvate decarboxylase-3	PDC3
BnaCnng52860D	fermentation	cytosol	AT5G01320	Thiamine pyrophosphate dependent pyruvate decarboxylase family protein	PDC4	14.1758	11.3969	-2.22972	7.25931	5.11952	-0.15161	1.18261e-25	1.51532e-16	0.63959	2.88554e-07	0.00212457	1
BnaAnng13920D	fermentation	cytosol	AT5G01320	Thiamine pyrophosphate dependent pyruvate decarboxylase family protein	PDC4	14.7317	14.5543	-1.67929	13.57	11.5023	0.520555	2.23677e-21	2.97612e-19	0.580545	8.51523e-20	1.27793e-15	0.933693
BnaC06g37860D	fermentation	cytosol	AT1G77120	ADH_ADH1_ATADH_ATADH1__alcohol dehydrogenase 1	ADH1	9.42885	7.93978	-0.149603	9.69246	8.48853	0.342632	1.42207e-50	5.54352e-40	0.966135	3.53303e-52	1.11935e-43	0.832363
BnaA06g07210D	fermentation	cytosol	AT1G77120	ADH_ADH1_ATADH_ATADH1__alcohol dehydrogenase 1	ADH1	0.440276	-0.16647	-0.507039	0.1152	0.841871	0.354505	0.769661	0.946108	0.91459	0.973547	0.588533	0.970589
BnaA07g33310D	fermentation	cytosol	AT1G77120	ADH_ADH1_ATADH_ATADH1__alcohol dehydrogenase 1	ADH1	9.33394	8.39705	-0.014285	9.34909	8.08162	0.33973	5.68314e-50	5.84697e-43	1	5.74334e-50	5.84163e-41	0.825137

## Sheet: PDH+TCA
ID	pathway	localization	AGI	annotation	Name	logFC.Root_H4h_AV	logFC.Root_H24h_AV	logFC.Leaf_H24h_AV	logFC.Root_H4h_ZS	logFC.Root_H24h_ZS	logFC.Leaf_H24h_ZS	FDR.Root_H4h_AV	FDR.Root_H24h_AV	FDR.Leaf_H24h_AV	FDR.Root_H4h_ZS	FDR.Root_H24h_ZS	FDR.Leaf_H24h_ZS
BnaA01g22040D	PDH	mito	AT1G59900	AT-E1 ALPHA_E1 ALPHA__pyruvate dehydrogenase complex E1 alpha subunit	PDH-E1alike	-0.576228	-0.393889	-0.089187	-0.390296	-0.415438	0.168958	0.00257843	0.0748046	0.899903	0.0617679	0.0514841	0.738797
BnaCnng28160D	PDH	mito	AT1G59900	AT-E1 ALPHA_E1 ALPHA__pyruvate dehydrogenase complex E1 alpha subunit	PDH-E1alike	2.46102	2.46184	-0.726475	3.75165	2.95746	0.00168865	0.00584886	0.0142576	0.785906	3.66999e-05	0.00146913	1
BnaCnng28170D	PDH	mito	AT1G59900	AT-E1 ALPHA_E1 ALPHA__pyruvate dehydrogenase complex E1 alpha subunit	PDH-E1alike	-1.61254	-1.59907	-2.17133	-0.0954862	0.729333	0.775943	0.302564	0.350024	0.661321	0.984263	0.661951	0.836719
BnaCnng66820D	PDH	mito	AT1G59900	AT-E1 ALPHA_E1 ALPHA__pyruvate dehydrogenase complex E1 alpha subunit	PDH-E1alike	-2.04284	-5.26899	-0.016811	-0.578075	0.522323	0.687578	0.279818	0.0130622	1	0.759916	0.789728	0.88139
BnaC01g28440D	PDH	mito	AT1G59900	AT-E1 ALPHA_E1 ALPHA__pyruvate dehydrogenase complex E1 alpha subunit	PDH-E1alike	-0.148776	-0.134374	-0.0461536	-0.0425065	0.013252	0.232452	0.500799	0.615664	0.980066	0.898494	0.985998	0.58641
BnaC06g31170D	PDH	mito	AT1G24180	IAR4__Thiamin diphosphate-binding fold (THDP-binding) superfamily protein	PDH-E1alike	-0.144673	-0.629087	-1.54371	-0.220681	-0.0208023	-0.50649	0.666306	0.0371499	1.4129e-06	0.517777	0.982102	0.301146
BnaC07g12860D	PDH	mito	AT1G24180	IAR4__Thiamin diphosphate-binding fold (THDP-binding) superfamily protein	PDH-E1alike	-0.538579	0.129478	1.07483	-0.339825	-0.17994	0.361344	0.16122	0.825627	0.0263595	0.438829	0.728998	0.686266
BnaC05g19320D	PDH	mito	AT1G24180	IAR4__Thiamin diphosphate-binding fold (THDP-binding) superfamily protein	PDH-E1alike	0.921741	0.102835	0.232302	0.958946	0.629795	-0.183663	0.00177481	0.835425	0.815774	0.00205203	0.0600012	0.889718
BnaA07g28560D	PDH	mito	AT1G24180	IAR4__Thiamin diphosphate-binding fold (THDP-binding) superfamily protein	PDH-E1alike	-0.744054	-0.494451	-1.17341	-0.351662	-0.238982	-0.892761	0.0979557	0.368111	0.0458893	0.515973	0.695423	0.22645
BnaA07g09080D	PDH	mito	AT1G24180	IAR4__Thiamin diphosphate-binding fold (THDP-binding) superfamily protein	PDH-E1alike	-1.19705	-0.259698	-0.270396	-0.795235	0.136481	0.864717	0.0330947	0.758171	0.885272	0.201953	0.886031	0.424589
BnaA09g29700D	PDH	mito	AT1G24180	IAR4__Thiamin diphosphate-binding fold (THDP-binding) superfamily protein	PDH-E1alike	-0.587819	-0.419625	-0.144684	-0.444391	-0.205138	0.220717	0.00798368	0.102459	0.853155	0.0660395	0.471371	0.747094
BnaA02g11520D	PDH	mito	AT5G50850	MAB1__Transketolase family protein	PDH-E1b	0.191534	0.663575	0.37225	0.192874	0.338747	-0.127776	0.586819	0.0436972	0.52115	0.618963	0.349059	0.922187
BnaC09g26770D	PDH	mito	AT5G50850	MAB1__Transketolase family protein	PDH-E1b	-0.722626	-0.690268	-0.169706	-0.373073	-0.439803	-0.186414	0.000117838	0.000694633	0.707086	0.0760016	0.0382872	0.709644
BnaA10g05930D	PDH	mito	AT5G50850	MAB1__Transketolase family protein	PDH-E1b	-0.105667	0.568568	0.197851	-0.380349	-0.296696	-0.0764069	0.775083	0.0796997	0.794896	0.254686	0.414877	0.983924
BnaA03g13490D	PDH	mito	AT5G50850	MAB1__Transketolase family protein	PDH-E1b	-0.330384	-0.212568	-0.455621	-0.065207	0.277607	0.397884	0.351742	0.637782	0.435555	0.909651	0.494485	0.573432
BnaC02g16000D	PDH	mito	AT5G50850	MAB1__Transketolase family protein	PDH-E1b	-0.408855	-0.147748	-0.137938	-0.130096	0.179216	0.0147928	0.0487219	0.60344	0.800612	0.62831	0.489614	1
BnaC03g16370D	PDH	mito	AT5G50850	MAB1__Transketolase family protein	PDH-E1b	-0.452718	-0.118809	-0.51307	0.0687866	0.142606	-0.0847536	0.46246	0.903615	0.656047	0.956836	0.874437	1
BnaC04g28350D	PDH	mito	AT3G52200	LTA3__Dihydrolipoamide acetyltransferase, long form protein	PDH-E2	-0.417712	-0.303011	-0.0898708	-0.271419	-0.28114	-0.0760877	0.0418295	0.211147	0.908971	0.240739	0.237589	0.947579
BnaC08g23510D	PDH	mito	AT3G52200	LTA3__Dihydrolipoamide acetyltransferase, long form protein	PDH-E2	-0.432441	-0.525992	0.525249	-0.87656	-0.748776	0.226734	0.35648	0.319652	0.523876	0.0547146	0.124199	0.880018
BnaA04g05600D	PDH	mito	AT3G52200	LTA3__Dihydrolipoamide acetyltransferase, long form protein	PDH-E2	-0.388368	-0.244493	-0.11981	-0.0557705	-0.026263	0.398565	0.167418	0.484426	0.902298	0.90603	0.969489	0.452838
BnaA03g33170D	PDH	mito	AT3G13930	Dihydrolipoamide acetyltransferase, long form protein	PDH-E2	-0.976932	-0.333645	0.0210081	-0.854662	-0.284239	0.116459	1.96883e-06	0.192626	1	6.66543e-05	0.272842	0.883023
BnaCnng28440D	PDH	mito	AT3G13930	Dihydrolipoamide acetyltransferase, long form protein	PDH-E2	-0.87039	-0.282941	-0.130843	-0.509477	-0.227577	0.0851576	7.2382e-06	0.257026	0.821331	0.0152087	0.36553	0.930258
BnaC03g38230D	PDH	mito	AT3G13930	Dihydrolipoamide acetyltransferase, long form protein	PDH-E2	-1.42504	-0.626892	-0.0742593	-0.974614	-0.450459	-0.229248	6.55503e-07	0.0616708	0.978436	0.00125821	0.194811	0.784969
BnaA05g25500D	PDH	mito	AT3G13930	Dihydrolipoamide acetyltransferase, long form protein	PDH-E2	-0.825225	-0.329017	-0.334303	-0.519918	0.210021	0.680189	0.0327136	0.520005	0.699747	0.231801	0.696109	0.32919
BnaA06g00560D	PDH	mito	AT1G54220	Dihydrolipoamide acetyltransferase, long form protein	PDH-E2	-0.20809	-0.177156	-0.226375	-0.108478	-0.0422522	0.0362028	0.446493	0.594815	0.668383	0.750641	0.92757	1
BnaC06g07040D	PDH	mito	AT1G54220	Dihydrolipoamide acetyltransferase, long form protein	PDH-E2	-0.44782	-0.188772	-0.124418	-0.259326	-0.204213	-0.169393	0.0189702	0.449222	0.815984	0.234501	0.387893	0.733498
BnaC06g10620D	PDH	mito	AT1G54220	Dihydrolipoamide acetyltransferase, long form protein	PDH-E2	-0.401105	0.111763	0.294027	-0.609894	0.400555	0.0359349	0.210187	0.813214	0.686503	0.0545929	0.247969	1
BnaC06g01550D	PR/ PDH	mito	AT1G48030	mtLPD1__mitochondrial lipoamide dehydrogenase 1	AtmLPD1/E3	-0.920663	-0.460751	-0.0915933	-0.650086	-0.291479	0.279992	0.000179686	0.116217	0.935849	0.0129482	0.348027	0.629924
BnaA06g04090D	PR/ PDH	mito	AT1G48030	mtLPD1__mitochondrial lipoamide dehydrogenase 1	AtmLPD1/E3	-0.901262	-1.14538	-0.0362215	-0.807677	-0.444264	0.250295	0.0197225	0.00528356	1	0.047076	0.342265	0.828224
BnaC05g36150D	PR/ PDH	mito	AT3G17240	mtLPD2__lipoamide dehydrogenase 2	AtmLPD2/E3	-1.12775	-0.513846	-0.434796	-0.841447	-0.586345	0.0357636	7.10259e-06	0.08457	0.334228	0.00138016	0.0386856	1
BnaA05g22860D	PR/ PDH	mito	AT3G17240	mtLPD2__lipoamide dehydrogenase 2	AtmLPD2/E3	-0.517446	0.0466776	0.26729	-0.108766	-0.419527	-0.961007	0.326089	0.967393	0.855867	0.894937	0.48954	0.244555
BnaC05g36200D	PR/ PDH	mito	AT3G17240	mtLPD2__lipoamide dehydrogenase 2	AtmLPD2/E3	-0.801161	-0.6018	-0.203908	-0.842516	0.389166	0.242593	0.186621	0.414714	0.951095	0.191216	0.61516	0.942721
BnaC05g00810D	PDH	plastid	AT1G01090	PDH-E1 ALPHA__pyruvate dehydrogenase E1 alpha	PDH-E1a	-0.332458	-0.669854	-0.118724	-0.246399	-0.629546	-1.13865	0.232664	0.0166864	0.896131	0.431163	0.0227999	0.000406508
BnaA09g51510D	PDH	plastid	AT1G01090	PDH-E1 ALPHA__pyruvate dehydrogenase E1 alpha	PDH-E1a	-0.376507	-1.05309	-0.612005	-0.10229	-1.67849	-2.28322	0.65914	0.211147	0.696521	0.946723	0.0321618	0.0223369
BnaC08g46110D	PDH	plastid	AT1G01090	PDH-E1 ALPHA__pyruvate dehydrogenase E1 alpha	PDH-E1a	-0.794345	-1.07356	-0.0265346	-0.10219	-1.00542	-0.370752	0.0345248	0.0069598	1	0.865241	0.0105379	0.677832
BnaA10g00730D	PDH	plastid	AT1G01090	PDH-E1 ALPHA__pyruvate dehydrogenase E1 alpha	PDH-E1a	-0.285016	-0.388668	0.392055	-0.255061	-0.698178	-0.762229	0.289131	0.1839	0.356925	0.383749	0.0064475	0.0210813
	PDH	plastid	AT2G34590	Transketolase family protein	PDH-E1b1
BnaA08g17560D	PDH	plastid	AT1G30120	PDH-E1 BETA__pyruvate dehydrogenase E1 beta	PDH-E1b2	-0.120052	-0.389012	-0.00159856	0.0941121	-0.130897	0.10106	0.83256	0.487458	1	0.899567	0.852952	0.988513
BnaCnng42420D	PDH	plastid	AT1G30120	PDH-E1 BETA__pyruvate dehydrogenase E1 beta	PDH-E1b2	-0.324655	-0.820905	0.00956563	-0.26933	-0.679291	-0.279008	0.180934	0.000551218	1	0.312793	0.00440596	0.582275
BnaA08g17570D	PDH	plastid	AT1G30120	PDH-E1 BETA__pyruvate dehydrogenase E1 beta	PDH-E1b2	-0.261291	-0.758954	0.0351829	-0.139928	-0.462116	0.311781	0.61476	0.131773	1	0.834752	0.388831	0.798179
BnaC03g59130D	PDH	plastid	AT1G30120	PDH-E1 BETA__pyruvate dehydrogenase E1 beta	PDH-E1b2	-0.0843226	-0.528939	-0.145476	-0.0429721	-0.5916	-0.306869	0.756563	0.0225557	0.787787	0.911489	0.00812366	0.46523
BnaA09g26420D	PDH	plastid	AT1G30120	PDH-E1 BETA__pyruvate dehydrogenase E1 beta	PDH-E1b2	-0.895786	-1.47576	0.338714	-0.66225	-0.829559	-0.412618	0.00147326	5.38943e-07	0.631896	0.0272159	0.00659338	0.505508
BnaC09g21610D	PDH	plastid	AT3G25860	LTA2_PLE2__2-oxoacid dehydrogenases acyltransferase family protein	PDH-E2	-0.371185	-0.528232	-0.0247099	0.177955	-0.842517	-0.875071	0.270668	0.154541	1	0.691414	0.0246062	0.0531705
BnaC09g19980D	PDH	plastid	AT3G25860	LTA2_PLE2__2-oxoacid dehydrogenases acyltransferase family protein	PDH-E2	-1.3101	-0.998007	-0.105582	-0.071505	0.144284	-0.824054	0.278049	0.517707	1	0.994175	0.96266	0.881044
BnaC07g23030D	PDH	plastid	AT3G25860	LTA2_PLE2__2-oxoacid dehydrogenases acyltransferase family protein	PDH-E2	-0.157912	-0.622895	-0.081485	-0.0330048	-0.748902	-0.403079	0.536509	0.00791881	0.933409	0.943151	0.000919168	0.302414
BnaA06g33300D	PDH	plastid	AT3G25860	LTA2_PLE2__2-oxoacid dehydrogenases acyltransferase family protein	PDH-E2	-0.647662	-0.954358	-0.130712	-0.161867	-0.501418	0.317173	0.19074	0.0689853	0.966453	0.818398	0.384474	0.818848
BnaA09g19620D	PDH	plastid	AT3G25860	LTA2_PLE2__2-oxoacid dehydrogenases acyltransferase family protein	PDH-E2	0.0376848	-0.00565342	0.829626	0.314422	-0.74583	-0.291236	0.966002	1	0.315655	0.62247	0.190749	0.858529
BnaC06g08280D	PDH	plastid	AT1G34430	EMB3003__2-oxoacid dehydrogenases acyltransferase family protein	PDH-E2	-0.896582	-1.32902	-0.392481	-0.634601	-1.42257	-1.0608	0.00187534	8.83922e-06	0.47642	0.0411694	1.47624e-06	0.00515232
BnaAnng02240D	PDH	plastid	AT1G34430	EMB3003__2-oxoacid dehydrogenases acyltransferase family protein	PDH-E2	-0.941605	-1.37351	-0.226454	-0.696274	-1.38083	-0.791304	0.000222448	1.81734e-07	0.707123	0.0101572	1.37132e-07	0.029142
BnaC01g21970D	PDH	plastid	AT4G16155	dihydrolipoyl dehydrogenases	PDH-E3	-1.03088	-1.10996	-0.409421	-0.709231	-1.00729	-0.22763	1.79023e-05	1.6105e-05	0.313146	0.00530926	9.29298e-05	0.715795
BnaA01g17630D	PDH	plastid	AT4G16155	dihydrolipoyl dehydrogenases	PDH-E3	-0.954402	-1.26723	0.171401	-0.648389	-1.17404	-0.374621	0.000322127	4.7821e-06	0.819323	0.0230769	2.33605e-05	0.506751
BnaC07g33500D	PDH	plastid	AT4G16155	dihydrolipoyl dehydrogenases	PDH-E3	0.921857	0.24235	0.327786	0.988035	-0.412197	0.171901	0.000290767	0.518572	0.533267	0.000833052	0.28218	0.85285
BnaA03g34340D	PDH	plastid	AT3G16950	LPD1_ptlpd1__lipoamide dehydrogenase 1	PDH-E3	-0.775761	-1.17428	0.128321	-0.594119	-0.960967	-0.798108	0.0342483	0.00215976	0.944279	0.136394	0.0123086	0.190404
BnaC03g39780D	PDH	plastid	AT3G16950	LPD1_ptlpd1__lipoamide dehydrogenase 1	PDH-E3	-1.08751	-1.13383	0.295988	-0.869469	-0.976528	-1.14992	0.000542739	0.000770016	0.698575	0.0085213	0.00371594	0.00856426
BnaC04g49560D	TCA cycle	mito	AT2G44350	ATCS_CSY4__Citrate synthase family protein	CSY4	-2.16586	-0.986213	0.00352868	-1.61968	-0.429822	0.258343	1.04319e-19	0.000129955	1	1.87708e-11	0.132396	0.673678
BnaA04g25660D	TCA cycle	mito	AT2G44350	ATCS_CSY4__Citrate synthase family protein	CSY4	-1.50285	-0.856927	-0.0759055	-1.22605	-1.27195	-0.358907	8.655e-07	0.0126966	0.980935	0.000115681	9.48178e-05	0.628097
BnaC03g24820D	TCA cycle	mito	AT2G44350	ATCS_CSY4__Citrate synthase family protein	CSY4	-1.35744	-1.08418	-0.373763	-1.06731	-0.524468	0.238635	5.61697e-06	0.000818823	0.553979	0.000572807	0.137149	0.781327
BnaA03g20770D	TCA cycle	mito	AT2G44350	ATCS_CSY4__Citrate synthase family protein	CSY4	-1.39655	-1.23479	-0.0831496	-0.900179	-0.815811	0.0475546	7.92803e-07	4.21374e-05	0.968616	0.00254147	0.00860478	1
BnaC04g22440D	TCA cycle	mito	AT3G60100	CSY5__citrate synthase 5	CSY5	-2.42029	-2.82296	-0.0053563	-0.0994345	0.709704	0.0822633	0.00366613	0.000468519	1	0.928276	0.292088	1
BnaC03g62580D	TCA cycle	mito	AT4G35830	ACO1__aconitase 1	ACO1	-0.365653	-0.279069	0.112855	-0.21498	-0.247002	-0.108846	0.0782877	0.256728	0.861231	0.371808	0.311157	0.879042
BnaC01g02790D	TCA cycle	mito	AT4G35830	ACO1__aconitase 1	ACO1	-0.280154	0.0531465	-0.0836871	0.129691	0.667273	-0.0342424	0.172731	0.872852	0.91133	0.60723	0.000720084	1
BnaA08g14870D	TCA cycle	mito	AT4G35830	ACO1__aconitase 1	ACO1	-0.355874	-0.425674	0.274524	-0.212974	-0.332532	-0.371161	0.167629	0.132306	0.612543	0.477591	0.248547	0.461631
BnaA01g01700D	TCA cycle	mito	AT4G35830	ACO1__aconitase 1	ACO1	-0.509279	-0.103498	-0.0621108	-0.121874	0.481905	-0.15903	0.0191566	0.754923	0.965559	0.699862	0.0551959	0.824785
BnaAnng22230D	TCA cycle	mito	AT4G26970	ACO2__aconitase 2	ACO2	-3.4281	-1.43023	-0.958496	-2.46025	-0.380798	-0.247511	4.37123e-13	0.00448005	0.187137	1.60665e-07	0.529796	0.880735
BnaA08g14220D	TCA cycle	mito	AT4G26970	ACO2__aconitase 2	ACO2	-2.91555	-1.57041	-1.354	-2.26237	-0.696228	-0.265282	5.32451e-09	0.00349224	0.0470265	6.91355e-06	0.237976	0.878754
BnaA03g38100D	TCA cycle	mito	AT2G05710	ACO3__aconitase 3	ACO3	-0.358952	-0.0189353	0.124097	-0.00319762	0.205724	0.323438	0.165587	0.977824	0.876827	1	0.520128	0.545298
BnaA06g07200D	TCA cycle	mito	AT2G05710	ACO3__aconitase 3	ACO3	-0.418707	-0.300877	0.0446057	-0.278743	-0.153087	0.0579092	0.0652203	0.266015	0.993862	0.276715	0.606603	0.983371
BnaC03g74450D	TCA cycle	mito	AT2G05710	ACO3__aconitase 3	ACO3	-0.733091	-0.343646	-0.128091	-0.594574	-0.168834	0.220303	0.000886447	0.204377	0.851462	0.0103787	0.571982	0.694959
BnaA08g10700D	TCA cycle	mito	AT4G35260	IDH-I_IDH1__isocitrate dehydrogenase 1	IDH-I	-0.0360091	0.0835208	-0.377547	0.176573	0.337899	-0.0439093	0.90165	0.791475	0.320601	0.47324	0.136396	1
BnaA01g02160D	TCA cycle	mito	AT4G35260	IDH-I_IDH1__isocitrate dehydrogenase 1	IDH-I	-0.754021	-0.572414	-0.393181	-0.876675	-0.39761	-0.395019	0.000145024	0.00953431	0.24096	3.15087e-05	0.095949	0.352714
BnaC03g65310D	TCA cycle	mito	AT4G35260	IDH-I_IDH1__isocitrate dehydrogenase 1	IDH-I	-0.350057	-0.30208	-0.188048	-0.23483	-0.151535	0.0313453	0.0896016	0.205608	0.682758	0.315718	0.564168	1
BnaC01g03290D	TCA cycle	mito	AT4G35260	IDH-I_IDH1__isocitrate dehydrogenase 1	IDH-I	-0.556573	-0.444441	-0.514204	-0.638089	-0.364822	-0.00880275	0.0107441	0.0737853	0.115623	0.00403732	0.143684	1
BnaA08g30580D	TCA cycle	mito	AT4G35260	IDH-I_IDH1__isocitrate dehydrogenase 1	IDH-I	-0.125321	0.23501	-0.473413	-0.039899	0.225455	-0.0916189	0.714315	0.527164	0.437948	0.946424	0.524546	0.975366
BnaC07g06150D	TCA cycle	mito	AT2G17130	IDH-II_IDH2__isocitrate dehydrogenase subunit 2	IDH-II	-0.869391	-0.373239	-0.379568	-0.507045	-0.102111	-0.0523984	9.26247e-05	0.170475	0.366901	0.036556	0.764772	0.996617
BnaA07g03150D	TCA cycle	mito	AT2G17130	IDH-II_IDH2__isocitrate dehydrogenase subunit 2	IDH-II	-0.842786	-0.18538	-0.14568	-0.36274	0.175485	0.162326	0.00154934	0.629155	0.878992	0.243497	0.635288	0.866541
	TCA cycle	mito	AT4G35650	IDH-III__isocitrate dehydrogenase III	IDH-III
	TCA cycle	cytosol	AT1G32480	IDH-IV__isocitrate dehydrogenase IV	IDH-IV
BnaCnng02920D	TCA cycle	mito	AT5G03290	IDH-V__isocitrate dehydrogenase V	IDH-V	0.127192	-0.0613502	0.695998	-0.0576073	0.0292372	-0.0846829	0.910558	0.976115	0.680335	0.986125	1	1
BnaA10g26650D	TCA cycle	mito	AT5G03290	IDH-V__isocitrate dehydrogenase V	IDH-V	-0.446218	-0.111964	-0.300229	-0.296749	-0.628609	-0.521261	0.296069	0.866196	0.754158	0.551886	0.163491	0.550677
BnaC03g01130D	TCA cycle	mito	AT5G03290	IDH-V__isocitrate dehydrogenase V	IDH-V	-0.698469	-0.398811	0.0202049	-0.457902	-0.162147	-0.0239509	0.00927524	0.219289	1	0.12258	0.662891	1
BnaA03g00820D	TCA cycle	mito	AT5G03290	IDH-V__isocitrate dehydrogenase V	IDH-V	-2.0079	-0.479048	-0.322368	-0.631149	-0.0195246	-0.472994	0.000725105	0.549063	0.861239	0.382099	1	0.789515
BnaC02g03240D	TCA cycle	mito	AT5G03290	IDH-V__isocitrate dehydrogenase V	IDH-V	-0.59127	-0.329481	0.35285	-0.090658	0.671059	0.701422	0.581064	0.820597	0.925215	0.972338	0.572418	0.775939
BnaAnng18390D	TCA cycle	mito	AT5G03290	IDH-V__isocitrate dehydrogenase V	IDH-V	0.343501	0.265377	0.0409102	0.117292	-0.150534	-0.451498	0.349767	0.555415	1	0.814669	0.756391	0.521206
BnaC05g43210D	TCA cycle	mito	AT3G09810	IDH-VI__isocitrate dehydrogenase VI	IDH-VI	-1.18275	-0.54676	-0.780347	-0.768901	0.245075	-0.295471	0.000935439	0.214321	0.759836	0.0475831	0.618079	0.986718
BnaA05g28740D	TCA cycle	mito	AT3G09810	IDH-VI__isocitrate dehydrogenase VI	IDH-VI	-0.989847	-0.452667	2.26801	-0.347655	0.135903	-0.198148	0.00871078	0.346288	0.638434	0.459866	0.818626	1
BnaA05g28730D	TCA cycle	mito	AT3G09810	IDH-VI__isocitrate dehydrogenase VI	IDH-VI	-0.786316	0.344907	0.0199213	-0.561364	-0.314998	-0.934803	0.137745	0.646643	1	0.301142	0.605978	0.863403
BnaA06g24700D	TCA cycle	mito	AT5G65750	2-oxoglutarate dehydrogenase, E1 component	ODH	-0.456013	-0.379544	-0.154745	-0.138498	-0.0466083	0.444687	0.123398	0.272714	0.858801	0.725132	0.933489	0.40717
BnaCnng13330D	TCA cycle	mito	AT5G65750	2-oxoglutarate dehydrogenase, E1 component	ODH	0.226802	0.36772	-0.0971271	0.32493	0.899444	0.239504	0.630089	0.468502	0.977117	0.49714	0.0333218	0.841633
BnaCnng13340D	TCA cycle	mito	AT5G65750	2-oxoglutarate dehydrogenase, E1 component	ODH	-0.137448	0.317941	0.222287	0.00525354	0.403734	0.375583	0.556713	0.173238	0.588355	1	0.0621552	0.276899
BnaA09g17400D	TCA cycle	mito	AT3G55410	2-oxoglutarate dehydrogenase, E1 component	ODH	-1.48501	-0.863296	-0.975464	-1.04863	-0.659077	-0.316559	2.90181e-05	0.0313349	0.0571902	0.00497931	0.109266	0.741709
BnaA09g17390D	TCA cycle	mito	AT3G55410	2-oxoglutarate dehydrogenase, E1 component	ODH	-1.73812	-0.945767	-0.439873	-1.25287	-0.492004	0.293148	5.88687e-06	0.0294854	0.590932	0.00169524	0.300788	0.792007
BnaCnng40160D	TCA cycle	mito	AT3G55410	2-oxoglutarate dehydrogenase, E1 component	ODH	-0.626899	0.129992	-0.140484	-0.349302	-0.163899	-0.243252	0.0220263	0.754529	0.875353	0.269323	0.664992	0.727554
BnaCnng40150D	TCA cycle	mito	AT3G55410	2-oxoglutarate dehydrogenase, E1 component	ODH	-0.313178	0.060518	-0.236591	0.157749	0.16861	0.314302	0.569634	0.950957	0.885812	0.838524	0.828198	0.852704
BnaC09g18140D	TCA cycle	mito	AT3G55410	2-oxoglutarate dehydrogenase, E1 component	ODH	-1.54556	-0.854995	-0.504396	-1.54881	-0.995883	-0.285235	1.35531e-08	0.00478274	0.277961	2.26289e-08	0.00065896	0.682226
BnaA07g37870D	TCA cycle	mito	AT3G55410	2-oxoglutarate dehydrogenase, E1 component	ODH	-0.0488241	-0.394746	-1.2982	-0.155941	0.241176	0.35947	0.962588	0.637517	0.143003	0.870459	0.783558	0.845288
BnaA07g37880D	TCA cycle	mito	AT3G55410	2-oxoglutarate dehydrogenase, E1 component	ODH	-0.209667	0.0376159	-0.6392	-0.159489	0.178278	-0.55902	0.637991	0.96506	0.298127	0.761774	0.742629	0.464133
BnaC03g03460D	TCA cycle	mito	AT5G08300	Succinyl-CoA ligase, alpha subunit	SCL	-0.795189	-0.331121	0.265254	-0.416717	-0.457518	-0.0670474	0.174554	0.67766	0.888318	0.549646	0.518049	1
BnaA03g02450D	TCA cycle	mito	AT5G08300	Succinyl-CoA ligase, alpha subunit	SCL	-0.214027	-0.252794	-0.196624	-0.13485	-0.0883772	-0.0322749	0.455065	0.440031	0.761052	0.694858	0.821108	1
BnaC09g47610D	TCA cycle	mito	AT5G08300	Succinyl-CoA ligase, alpha subunit	SCL	-0.466985	-0.31351	-0.478965	-0.200531	-0.27804	-0.104809	0.03378	0.234488	0.14462	0.45125	0.286817	0.902956
BnaAnng06200D	TCA cycle	mito	AT5G08300	Succinyl-CoA ligase, alpha subunit	SCL	0.0642909	-0.154565	-0.246734	-0.460452	-0.212903	-0.280659	0.906498	0.791466	0.806938	0.28292	0.680172	0.78554
BnaA10g23060D	TCA cycle	mito	AT5G08300	Succinyl-CoA ligase, alpha subunit	SCL	-1.03586	0.0437606	6.876e-05	-0.155551	0.641149	-0.928753	0.222195	0.988691	1	0.927444	0.591319	0.716246
BnaC02g01230D	TCA cycle	mito	AT5G08300	Succinyl-CoA ligase, alpha subunit	SCL	-1.09939	-0.824505	-0.446223	-0.183563	0.358876	0.116665	0.0298866	0.161222	0.691643	0.806718	0.589531	0.993045
BnaC07g49680D	TCA cycle	mito	AT5G23250	Succinyl-CoA ligase, alpha subunit	SCL	-0.0831838	-0.00056557	-0.109935	0.0873504	-0.21839	0.0464932	0.755115	1	0.890637	0.777638	0.407915	1
BnaA03g39510D	TCA cycle	mito	AT5G23250	Succinyl-CoA ligase, alpha subunit	SCL	-0.0200445	-0.208169	-0.204245	0.087033	-0.270882	-0.00188908	0.962997	0.529579	0.751134	0.814915	0.375328	1
BnaC07g00480D	TCA cycle	mito	AT2G20420	ATP citrate lyase (ACL) family protein	ACL	-0.270293	0.166729	-0.160103	-0.134558	0.31754	0.0166848	0.216524	0.546023	0.758607	0.61041	0.172338	1
BnaA07g00290D	TCA cycle	mito	AT2G20420	ATP citrate lyase (ACL) family protein	ACL	-0.552342	-0.13074	-0.128064	-0.0954878	-0.548696	-1.32356	0.307671	0.87801	0.973569	0.916816	0.371095	0.0724319
BnaC09g11540D	TCA cycle	mito	AT2G20420	ATP citrate lyase (ACL) family protein	ACL	-0.588436	-0.401263	-0.250129	-0.243958	-0.281633	-0.0698764	0.00508248	0.100618	0.56725	0.331785	0.267281	0.961671
BnaA09g11210D	TCA cycle	mito	AT2G20420	ATP citrate lyase (ACL) family protein	ACL	-0.202126	0.025708	0.0371054	-0.221717	0.413596	0.814696	0.752849	0.990668	1	0.758232	0.523189	0.398946
BnaA09g52600D	TCA cycle	mito	AT5G66760	SDH1-1__succinate dehydrogenase 1-1	SDH1-1	-0.419464	-0.41287	-0.134978	-0.196936	-0.295074	0.416716	0.0614617	0.100218	0.829672	0.464101	0.257793	0.280783
BnaA07g37420D	TCA cycle	mito	AT5G66760	SDH1-1__succinate dehydrogenase 1-1	SDH1-1	-0.442224	-0.26534	-0.182673	-0.269183	-0.253443	0.120273	0.139719	0.479929	0.814001	0.43578	0.482715	0.92457
BnaC07g16540D	TCA cycle	mito	AT5G66760	SDH1-1__succinate dehydrogenase 1-1	SDH1-1	-0.416042	-0.387853	-0.26528	-0.0607591	-0.368808	0.185621	0.0714866	0.136663	0.557778	0.86852	0.148815	0.751001
BnaC02g43980D	TCA cycle	mito	AT5G66760	SDH1-1__succinate dehydrogenase 1-1	SDH1-1	-0.523219	-0.754469	-0.252666	-0.282945	-0.564781	0.378909	0.143601	0.0444564	0.761098	0.502063	0.141882	0.625479
BnaC09g07800D	TCA cycle	mito	AT5G66760	SDH1-1__succinate dehydrogenase 1-1	SDH1-1	-0.328113	-0.311829	-0.224496	-0.0718213	-0.305329	0.0257247	0.146281	0.227969	0.633916	0.827752	0.223335	1
BnaAnng38880D	TCA cycle	mito	AT5G66760	SDH1-1__succinate dehydrogenase 1-1	SDH1-1	0.0336222	0.28344	-0.832438	-1.70244	0.00852026	-2.87328	0.995092	0.859852	0.666163	0.426544	1	0.598177
BnaC03g48410D	TCA cycle	mito	AT2G18450	SDH1-2__succinate dehydrogenase 1-2	SDH1-2	-0.586496	-1.83514	-0.714481	0.148416	-0.908412	-0.0461656	0.212694	5.40894e-05	0.942062	0.826767	0.0632395	1
BnaA06g25230D	TCA cycle	mito	AT2G18450	SDH1-2__succinate dehydrogenase 1-2	SDH1-2	-0.502914	-1.85659	-0.728091	0.515594	-0.661941	-0.0319032	0.350831	0.000273672	0.940307	0.377181	0.254598	1
BnaA09g02000D	TCA cycle	mito	AT3G27380	SDH2-1__succinate dehydrogenase 2-1	SDH2-1	-0.512023	-0.0254332	0.00041284	-0.109848	-0.134786	-0.539124	0.79462	1	1	0.930235	0.906909	0.770281
BnaC09g01440D	TCA cycle	mito	AT3G27380	SDH2-1__succinate dehydrogenase 2-1	SDH2-1	0.0425538	-1.67634	-0.0447973	-0.836047	1.02119	-0.15178	1	0.444338	1	0.409079	0.307256	1
BnaCnng16210D	TCA cycle	mito	AT3G27380	SDH2-1__succinate dehydrogenase 2-1	SDH2-1	-1.76256	-1.96173	0.0524152	-1.85977	-2.12239	-0.0498569	3.90999e-05	1.6007e-05	1	1.98858e-05	2.00721e-06	1
BnaA02g28880D	TCA cycle	mito	AT3G27380	SDH2-1__succinate dehydrogenase 2-1	SDH2-1	-0.838322	-0.758995	-0.0865257	-0.821833	-1.01423	0.0333646	0.00204258	0.0110437	0.955752	0.00352607	0.000340886	1
BnaA06g32140D	TCA cycle	mito	AT3G27380	SDH2-1__succinate dehydrogenase 2-1	SDH2-1	0.412379	-0.0554953	-0.0782869	0.299204	0.195792	0.618078	0.394546	0.951538	1	0.589129	0.756488	0.485112
BnaC07g24280D	TCA cycle	mito	AT3G27380	SDH2-1__succinate dehydrogenase 2-1	SDH2-1	-0.220034	-0.58352	-0.0323881	-0.363053	-0.539926	0.148178	0.483154	0.0549765	1	0.244089	0.0719075	0.876856
BnaA09g02000D	TCA cycle	mito	AT3G27380	SDH2-1__succinate dehydrogenase 2-1	SDH2-1	-0.512023	-0.0254332	0.00041284	-0.109848	-0.134786	-0.539124	0.79462	1	1	0.930235	0.906909	0.770281
BnaC09g01440D	TCA cycle	mito	AT3G27380	SDH2-1__succinate dehydrogenase 2-1	SDH2-1	0.0425538	-1.67634	-0.0447973	-0.836047	1.02119	-0.15178	1	0.444338	1	0.409079	0.307256	1
BnaCnng16210D	TCA cycle	mito	AT3G27380	SDH2-1__succinate dehydrogenase 2-1	SDH2-1	-1.76256	-1.96173	0.0524152	-1.85977	-2.12239	-0.0498569	3.90999e-05	1.6007e-05	1	1.98858e-05	2.00721e-06	1
BnaA02g28880D	TCA cycle	mito	AT3G27380	SDH2-1__succinate dehydrogenase 2-1	SDH2-1	-0.838322	-0.758995	-0.0865257	-0.821833	-1.01423	0.0333646	0.00204258	0.0110437	0.955752	0.00352607	0.000340886	1
BnaA06g32140D	TCA cycle	mito	AT3G27380	SDH2-1__succinate dehydrogenase 2-1	SDH2-1	0.412379	-0.0554953	-0.0782869	0.299204	0.195792	0.618078	0.394546	0.951538	1	0.589129	0.756488	0.485112
BnaC07g24280D	TCA cycle	mito	AT3G27380	SDH2-1__succinate dehydrogenase 2-1	SDH2-1	-0.220034	-0.58352	-0.0323881	-0.363053	-0.539926	0.148178	0.483154	0.0549765	1	0.244089	0.0719075	0.876856
BnaA07g15100D	TCA cycle	mito	AT5G40650	SDH2-2__succinate dehydrogenase 2-2	SDH2-2	-0.715047	0.611929	-3.12928	1.10145	0.48564	-0.964543	0.396923	0.539509	0.43595	0.228448	0.584883	0.857226
BnaC06g13120D	TCA cycle	mito	AT5G40650	SDH2-2__succinate dehydrogenase 2-2	SDH2-2	0.86795	0.316589	4.65072	0.371511	-1.33895	-0.483911	0.345564	0.798858	0.105252	0.813128	0.487906	0.981652
BnaA07g15090D	TCA cycle	mito	AT5G40650	SDH2-2__succinate dehydrogenase 2-2	SDH2-2	-0.240762	-0.723546	0.0254573	0.247153	-0.223916	-1.65083	0.827595	0.529181	1	0.829341	0.826104	0.642523
	TCA cycle	mito	AT4G32210	SDH3-2__succinate dehydrogenase 3-2	SDH3-2
BnaA10g22460D	TCA cycle	mito	AT5G09600	SDH3-1__succinate dehydrogenase 3-1	SDH3-1	-0.248852	0.00391913	0.463413	-0.186443	0.232058	0.260492	0.465236	1	0.398979	0.636263	0.54977	0.746235
BnaC09g47030D	TCA cycle	mito	AT5G09600	SDH3-1__succinate dehydrogenase 3-1	SDH3-1	-0.283496	-0.0681385	0.0800954	-0.138801	0.0279689	0.353002	0.155481	0.823981	0.91837	0.563636	0.943124	0.303418
BnaA03g21470D	TCA cycle	mito	AT2G46505	SDH4__succinate dehydrogenase subunit 4	SDH4	-0.257088	-0.175575	0.250758	-0.386939	-0.296831	0.139375	0.282035	0.557215	0.585098	0.102769	0.24964	0.840729
BnaC03g25850D	TCA cycle	mito	AT2G46505	SDH4__succinate dehydrogenase subunit 4	SDH4	-0.0407165	0.50853	0.525986	0.045173	0.325764	0.352923	0.905591	0.0504474	0.13197	0.916816	0.233607	0.454782
BnaA05g01340D	TCA cycle	mito	AT2G46505	SDH4__succinate dehydrogenase subunit 4	SDH4	-0.258366	-0.292532	0.126439	-0.478271	-0.569482	-0.222393	0.51202	0.520554	0.936902	0.231489	0.153408	0.85285
BnaC08g04470D	TCA cycle	mito	AT1G47420	SDH5__succinate dehydrogenase 5	SDH5	-0.580048	-0.425397	0.183	-0.412243	-0.44402	0.0342436	0.00876778	0.0973472	0.74767	0.0885769	0.0732723	1
BnaC06g00070D	TCA cycle	mito	AT1G47420	SDH5__succinate dehydrogenase 5	SDH5	-0.0210054	0.249666	0.180878	-0.102917	0.216372	0.286706	0.947893	0.304769	0.6781	0.704018	0.371232	0.470802
BnaA10g05140D	TCA cycle	mito	AT1G47420	SDH5__succinate dehydrogenase 5	SDH5	-0.207994	0.211741	0.722818	-0.339266	-0.0775149	0.360269	0.598701	0.653513	0.150986	0.392058	0.894202	0.648338
BnaA08g03800D	TCA cycle	mito	AT1G47420	SDH5__succinate dehydrogenase 5	SDH5	-0.694108	-0.470701	0.0946834	-0.466432	-0.289645	0.0680823	0.00285779	0.0815264	0.932399	0.0672664	0.315326	0.982299
BnaA06g04890D	TCA cycle	mito	AT1G08480	SDH6__unknown protein; FUNCTIONS IN: molecular_function unknown; INVOLVED IN: biological_process unknown; LOCATED IN: mitochondrion, plasma membrane, plastid, vacuole; EXPRESSED IN: 27 plant structures; EXPRESSED DURING: 15 growth stages; Has 39 Blast hits to 39 proteins in 13 species: Archae - 0; Bacteria - 0; Metazoa - 0; Fungi - 0; Plants - 39; Viruses - 0; Other Eukaryotes - 0 (source: NCBI B…	SDH6	0.101118	0.167699	0.756171	-0.0295877	0.385072	0.76951	0.895456	0.850041	0.446834	0.997124	0.583862	0.477005
BnaC05g06140D	TCA cycle	mito	AT1G08480	SDH6__unknown protein; FUNCTIONS IN: molecular_function unknown; INVOLVED IN: biological_process unknown; LOCATED IN: mitochondrion, plasma membrane, plastid, vacuole; EXPRESSED IN: 27 plant structures; EXPRESSED DURING: 15 growth stages; Has 39 Blast hits to 39 proteins in 13 species: Archae - 0; Bacteria - 0; Metazoa - 0; Fungi - 0; Plants - 39; Viruses - 0; Other Eukaryotes - 0 (source: NCBI B…	SDH6	-0.160497	0.116669	0.187671	-0.192042	0.112128	0.183966	0.501614	0.700071	0.690638	0.44373	0.699421	0.731692
BnaC08g13570D	TCA cycle	mito	AT1G08480	SDH6__unknown protein; FUNCTIONS IN: molecular_function unknown; INVOLVED IN: biological_process unknown; LOCATED IN: mitochondrion, plasma membrane, plastid, vacuole; EXPRESSED IN: 27 plant structures; EXPRESSED DURING: 15 growth stages; Has 39 Blast hits to 39 proteins in 13 species: Archae - 0; Bacteria - 0; Metazoa - 0; Fungi - 0; Plants - 39; Viruses - 0; Other Eukaryotes - 0 (source: NCBI B…	SDH6	-0.048022	-0.134919	0.219019	-0.267547	-0.205683	0.185565	0.873743	0.661564	0.638434	0.278858	0.443189	0.737142
BnaA08g26910D	TCA cycle	mito	AT1G08480	SDH6__unknown protein; FUNCTIONS IN: molecular_function unknown; INVOLVED IN: biological_process unknown; LOCATED IN: mitochondrion, plasma membrane, plastid, vacuole; EXPRESSED IN: 27 plant structures; EXPRESSED DURING: 15 growth stages; Has 39 Blast hits to 39 proteins in 13 species: Archae - 0; Bacteria - 0; Metazoa - 0; Fungi - 0; Plants - 39; Viruses - 0; Other Eukaryotes - 0 (source: NCBI B…	SDH6	-1.16128	0.329171	0.494426	-0.38079	-0.522177	0.771423	0.473177	0.893302	0.940846	0.882032	0.829322	0.896013
BnaC03g57270D	TCA cycle	mito	AT3G47833	SDH7_SDH7A__unknown protein; BEST Arabidopsis thaliana protein match is: unknown protein (TAIR:AT5G62575.2); Has 42 Blast hits to 42 proteins in 12 species: Archae - 0; Bacteria - 0; Metazoa - 0; Fungi - 0; Plants - 42; Viruses - 0; Other Eukaryotes - 0 (source: NCBI BLink).	SDH7A	-0.414061	-0.336625	0.0549514	-0.310158	-0.182461	-0.112536	0.0539828	0.178767	0.978595	0.190637	0.49918	0.888844
BnaA06g17070D	TCA cycle	mito	AT3G47833	SDH7_SDH7A__unknown protein; BEST Arabidopsis thaliana protein match is: unknown protein (TAIR:AT5G62575.2); Has 42 Blast hits to 42 proteins in 12 species: Archae - 0; Bacteria - 0; Metazoa - 0; Fungi - 0; Plants - 42; Viruses - 0; Other Eukaryotes - 0 (source: NCBI BLink).	SDH7A	-0.101603	-0.156649	-0.067279	-0.0894671	0.0266431	0.303929	0.694762	0.588977	0.958511	0.76486	0.95386	0.500346
BnaC03g53440D	TCA cycle	mito	AT3G47833	SDH7_SDH7A__unknown protein; BEST Arabidopsis thaliana protein match is: unknown protein (TAIR:AT5G62575.2); Has 42 Blast hits to 42 proteins in 12 species: Archae - 0; Bacteria - 0; Metazoa - 0; Fungi - 0; Plants - 42; Viruses - 0; Other Eukaryotes - 0 (source: NCBI BLink).	SDH7A	-0.799835	-0.71156	0.474533	-0.68156	-0.506491	0.389681	0.00145466	0.0109947	0.404427	0.0100215	0.075746	0.548872
	TCA cycle	mito	AT5G62575	SDH7_SDH7B__unknown protein; FUNCTIONS IN: molecular_function unknown; INVOLVED IN: biological_process unknown; LOCATED IN: mitochondrion; EXPRESSED IN: 25 plant structures; EXPRESSED DURING: 15 growth stages; BEST Arabidopsis thaliana protein match is: unknown protein (TAIR:AT3G47833.1); Has 30201 Blast hits to 17322 proteins in 780 species: Archae - 12; Bacteria - 1396; Metazoa - 17338; Fungi -…	SDH7B
BnaA03g21380D	TCA cycle	mito	AT2G46390	SDH8__unknown protein; FUNCTIONS IN: molecular_function unknown; INVOLVED IN: biological_process unknown; LOCATED IN: endomembrane system; EXPRESSED IN: 24 plant structures; EXPRESSED DURING: 15 growth stages; Has 4 Blast hits to 4 proteins in 2 species: Archae - 0; Bacteria - 0; Metazoa - 0; Fungi - 0; Plants - 4; Viruses - 0; Other Eukaryotes - 0 (source: NCBI BLink).	SDH8	-0.425217	0.118993	0.208774	-0.146919	0.20234	-0.198395	0.111954	0.763211	0.745622	0.670947	0.543471	0.793439
BnaC03g25770D	TCA cycle	mito	AT2G46390	SDH8__unknown protein; FUNCTIONS IN: molecular_function unknown; INVOLVED IN: biological_process unknown; LOCATED IN: endomembrane system; EXPRESSED IN: 24 plant structures; EXPRESSED DURING: 15 growth stages; Has 4 Blast hits to 4 proteins in 2 species: Archae - 0; Bacteria - 0; Metazoa - 0; Fungi - 0; Plants - 4; Viruses - 0; Other Eukaryotes - 0 (source: NCBI BLink).	SDH8	-0.631718	0.0491738	0.217417	-0.616518	0.19326	0.2795	0.309693	0.97288	0.928486	0.357656	0.827128	0.897492
BnaA05g01420D	TCA cycle	mito	AT2G46390	SDH8__unknown protein; FUNCTIONS IN: molecular_function unknown; INVOLVED IN: biological_process unknown; LOCATED IN: endomembrane system; EXPRESSED IN: 24 plant structures; EXPRESSED DURING: 15 growth stages; Has 4 Blast hits to 4 proteins in 2 species: Archae - 0; Bacteria - 0; Metazoa - 0; Fungi - 0; Plants - 4; Viruses - 0; Other Eukaryotes - 0 (source: NCBI BLink).	SDH8	-0.365402	-0.384533	0.083493	-0.533778	-0.0216747	-0.180136	0.302171	0.344577	0.977292	0.132561	0.987511	0.880168
BnaC04g01200D	TCA cycle	mito	AT2G46390	SDH8__unknown protein; FUNCTIONS IN: molecular_function unknown; INVOLVED IN: biological_process unknown; LOCATED IN: endomembrane system; EXPRESSED IN: 24 plant structures; EXPRESSED DURING: 15 growth stages; Has 4 Blast hits to 4 proteins in 2 species: Archae - 0; Bacteria - 0; Metazoa - 0; Fungi - 0; Plants - 4; Viruses - 0; Other Eukaryotes - 0 (source: NCBI BLink).	SDH8	-0.511993	-0.308482	0.432113	-0.549939	-0.247506	-0.133241	0.0693112	0.381705	0.385601	0.0621111	0.483553	0.904952
BnaA05g00440D	TCA cycle	mito	AT2G47510	FUM1__fumarase 1	FUM1	-0.764969	-1.05653	-0.602097	-0.863046	-0.842043	-0.33387	0.0142921	0.00130763	0.228272	0.00748575	0.0116235	0.668999
BnaA04g27030D	TCA cycle	mito	AT2G47510	FUM1__fumarase 1	FUM1	0.100959	0.0379903	1.3664	0.095722	0.236468	0.0702103	0.889752	0.982466	0.157187	0.928189	0.783628	1
BnaC04g51900D	TCA cycle	mito	AT2G47510	FUM1__fumarase 1	FUM1	-1.26723	-1.03852	-0.279777	-0.723026	-0.85174	-0.173764	1.28618e-06	0.00022226	0.638434	0.00983145	0.00258055	0.840129
BnaA04g27040D	TCA cycle	mito	AT2G47510	FUM1__fumarase 1	FUM1	0.222335	0.206335	0.627726	0.187457	0.228135	0.174983	0.40066	0.525865	0.0717482	0.529806	0.450583	0.812586
BnaCnng54490D	TCA cycle	mito	AT2G47510	FUM1__fumarase 1	FUM1	-0.777902	-1.19178	-0.600329	-0.622342	-0.739556	-1.1709	0.114837	0.0217923	0.548013	0.251211	0.183797	0.133944
BnaC04g51800D	TCA cycle	mito	AT2G47510	FUM1__fumarase 1	FUM1	0.537661	0.792307	0.531198	0.136154	0.806886	0.358874	0.0937191	0.0196768	0.496712	0.763053	0.0143961	0.73481
BnaAnng12720D	TCA cycle	mito	AT2G47510	FUM1__fumarase 1	FUM1	0.563445	0.394112	-0.163349	0.903521	0.522905	0.126663	0.1436	0.40877	0.905702	0.0160598	0.232558	0.954124
BnaC04g51220D	TCA cycle	mito	AT2G47510	FUM1__fumarase 1	FUM1	-0.765797	-0.947198	-0.149614	-0.365346	-0.723949	0.0221332	0.000245833	1.44731e-05	0.791756	0.124119	0.00112625	1
	TCA cycle	mito	AT5G50950	FUM2__FUMARASE 2	FUM2
BnaA05g14590D	TCA cycle	mito	AT1G53240	mMDH1__Lactate/malate dehydrogenase family protein	mMDH1	-0.796248	-0.7556	-0.807782	-0.679153	-0.456828	-0.203027	0.00089632	0.00385733	0.00828963	0.00711126	0.098939	0.750245
BnaC03g78200D	TCA cycle	mito	AT1G53240	mMDH1__Lactate/malate dehydrogenase family protein	mMDH1	0.329031	0.0348427	0.477424	-0.3725	-0.400967	-0.285663	0.66074	0.98707	0.743723	0.65225	0.633981	0.910285
BnaA06g01050D	TCA cycle	mito	AT1G53240	mMDH1__Lactate/malate dehydrogenase family protein	mMDH1	-1.15956	-0.605415	-0.480469	-0.723397	-0.334631	-0.0555373	6.41364e-08	0.012947	0.150348	0.00140096	0.203004	0.98704
BnaC06g06220D	TCA cycle	mito	AT1G53240	mMDH1__Lactate/malate dehydrogenase family protein	mMDH1	-0.997388	-0.533203	-0.178066	-0.698036	-0.480263	0.0674985	4.66198e-06	0.0335783	0.744192	0.00236442	0.0538229	0.971229
BnaA08g01250D	TCA cycle	mito	AT1G53240	mMDH1__Lactate/malate dehydrogenase family protein	mMDH1	-0.615551	-0.642503	-0.133356	-0.533532	-0.351071	-0.413417	0.120753	0.147455	0.939268	0.214748	0.46367	0.637871
BnaCnng29330D	TCA cycle	mito	AT1G53240	mMDH1__Lactate/malate dehydrogenase family protein	mMDH1	-0.838345	-0.600794	-0.16943	-0.791092	-0.289361	0.335059	0.00815757	0.101488	0.866313	0.0166992	0.475604	0.653549
	TCA cycle	mito	AT3G15020	mMDH2__Lactate/malate dehydrogenase family protein	mMDH2

## Sheet: photorespiration
ID	pathway	localization	AGI	annotation	Name	logFC.Root_H4h_AV	logFC.Root_H24h_AV	logFC.Leaf_H24h_AV	logFC.Root_H4h_ZS	logFC.Root_H24h_ZS	logFC.Leaf_H24h_ZS	FDR.Root_H4h_AV	FDR.Root_H24h_AV	FDR.Leaf_H24h_AV	FDR.Root_H4h_ZS	FDR.Root_H24h_ZS	FDR.Leaf_H24h_ZS
	photorespiration	plastid	AT5G36700	ATPGLP1_PGLP1__2-phosphoglycolate phosphatase 1	PGLP1
BnaC04g30020D	photorespiration	plastid	AT5G36790	Haloacid dehalogenase-like hydrolase (HAD) superfamily protein	HAD	-0.336874	-1.5862	-0.173474	-1.20036	-1.38528	0.184089	0.602661	0.00189209	0.814201	0.0639591	0.0300048	0.818246
BnaA04g07760D	photorespiration	plastid	AT5G36790	Haloacid dehalogenase-like hydrolase (HAD) superfamily protein	HAD	0.107598	-1.87894	-0.17831	-0.00469744	-3.34031	0.239247	0.836593	1.64417e-07	0.848547	1	5.42803e-15	0.778263
BnaC09g20390D	photorespiration	plastid	AT5G47760	ATPGLP2_ATPK5_PGLP2_PGLP2__2-phosphoglycolate phosphatase 2	PGLP2	-1.24165	-2.27508	0.360425	-1.17918	-2.0849	0.52538	5.4205e-05	1.23956e-12	0.581304	0.00017661	5.23338e-11	0.372999
BnaA09g18460D	photorespiration	plastid	AT5G47760	ATPGLP2_ATPK5_PGLP2_PGLP2__2-phosphoglycolate phosphatase 2	PGLP2	-0.102464	-0.857909	-0.391584	-0.67676	-2.8504	-0.799848	0.903908	0.22024	0.794054	0.342189	7.52678e-06	0.522461
BnaA01g29420D	photorespiration	perox	AT3G14415	glycolate oxidase 2	GOX2	-0.732191	0.383735	0.647423	-1.49625	0.441885	0.0346081	0.264805	0.653614	0.601559	0.0247315	0.582004	1
BnaC01g36940D	photorespiration	perox	AT3G14415	glycolate oxidase 2	GOX2	-0.453947	-2.36932	-0.156044	-0.800861	-1.92716	0.212511	0.349967	1.13232e-07	0.929126	0.100386	1.89488e-05	0.882517
BnaA03g33370D	photorespiration	perox	AT3G14415	glycolate oxidase 2	GOX2	1.31147	2.30252	0.194343	2.18712	1.18384	0.144895	0.0220803	0.0138449	0.82865	0.00710556	0.1526	0.910064
BnaCnng09830D	photorespiration	perox	AT3G14415	glycolate oxidase 2	GOX2	1.8694	0.701837	0.0286326	-2.15783	-0.385484	0.374604	0.2172	0.697372	1	0.137771	0.847947	0.899366
BnaA03g33380D	photorespiration	perox	AT3G14415	glycolate oxidase 2	GOX2	2.48473	0.402575	0.121392	-0.798465	-0.154029	0.335319	0.12687	0.782774	0.915047	0.293743	0.913	0.614899
BnaC03g38540D	photorespiration	perox	AT3G14415	glycolate oxidase 2	GOX2	0.851858	1.8357	0.269905	0.12557	0.990714	0.162843	0.183542	0.00403481	0.714671	0.90521	0.0810693	0.887449
BnaA05g25050D	photorespiration	perox	AT3G14420	glycolate oxidase 1	GOX1	0.616453	0.351038	-0.142608	-0.161888	-0.464957	0.777831	0.589081	0.835225	1	0.937633	0.765144	0.70644
BnaC05g39220D	photorespiration	perox	AT3G14420	glycolate oxidase 1	GOX1	1.02737	0.5315	-0.217827	-0.421799	-0.956584	0.400432	0.153555	0.623093	0.911263	0.675455	0.303185	0.769594
BnaC01g36930D	photorespiration	perox	AT3G14420	glycolate oxidase 1	GOX1	-0.170086	-1.37495	-0.330712	-0.79168	-1.63103	0.178643	0.771057	0.00483668	0.74641	0.110713	0.000503423	0.924274
BnaC03g38550D	photorespiration	perox	AT3G14420	glycolate oxidase 1	GOX1	-0.00014137	-0.00042356	-0.392039	0.0196575	0.00784691	0.508409	1	1	0.809079	1	1	0.743017
BnaA01g29410D	photorespiration	perox	AT3G14420	glycolate oxidase 1	GOX1	0.524653	-1.12696	0.293257	0.507073	-0.90773	-1.0038	0.702807	0.435038	0.971621	0.795385	0.586163	0.724992
BnaA03g58240D	photorespiration	perox	AT4G18360	glycolate oxidase 3	GOX3	-0.0512879	-0.204521	0.0217635	-0.481057	-0.176382	0.422569	0.940949	0.758665	1	0.3561	0.788814	0.9511
BnaC07g35250D	photorespiration	perox	AT4G18360	glycolate oxidase 3	GOX3	0.560659	0.372428	0.582635	0.396699	0.0462016	0.083339	0.0324265	0.235433	0.658857	0.170714	0.926756	0.9982
BnaC01g37200D	photorespiration	perox	AT3G14130	Aldolase-type TIM barrel family protein	HAOX1	0.151623	0.0992092	0.329005	-0.150653	-7.77442	-7.63774	0.95637	0.977441	0.985025	1	0.00254491	0.0504472
BnaC03g62120D	photorespiration	perox	AT3G14130	Aldolase-type TIM barrel family protein	HAOX1	3.64672	0.347123	-0.120945	2.17841	-5.13219	-6.49865	0.114171	0.934056	1	0.366018	0.0835567	0.217241
BnaA05g25330D	photorespiration	perox	AT3G14130	Aldolase-type TIM barrel family protein	HAOX1	-0.778886	-0.0947239	0.25966	-0.608295	-1.58192	0.807186	0.373556	0.954773	0.947675	0.57493	0.0892899	0.659906
BnaC04g26750D	photorespiration	perox	AT3G14130	Aldolase-type TIM barrel family protein	HAOX1	2.02431	1.00941	-0.144128	1.43368	1.228	0.312327	4.12334e-09	0.00844926	0.932562	5.25636e-05	0.000829513	0.751435
BnaA01g29580D	photorespiration	perox	AT3G14130	Aldolase-type TIM barrel family protein	HAOX1	1.50707	1.48416	0.579252	0.867186	1.93758	0.0610025	0.000916492	0.00187985	0.638434	0.0721558	1.91578e-05	1
BnaA01g29560D	photorespiration	perox	AT3G14130	Aldolase-type TIM barrel family protein	HAOX1	-0.464492	0.784652	-1.73707	-0.351786	0.16092	1.26287	0.370916	0.140472	0.570569	0.472842	0.784782	0.25603
BnaC05g52090D	photorespiration	perox	AT3G14130	Aldolase-type TIM barrel family protein	HAOX1	-0.961791	0.121813	0.109225	-1.09914	-0.419091	0.985052	0.00164704	0.803955	0.969873	0.000386175	0.25343	0.0617413
BnaA03g33220D	photorespiration	perox	AT3G14150	Aldolase-type TIM barrel family protein	HAOX2	0.566536	0.470669	-0.0134906	1.34076	1.39088	1.32013	0.606862	0.724785	1	0.216571	0.220636	0.729087
BnaC05g52100D	photorespiration	perox	AT3G14150	Aldolase-type TIM barrel family protein	HAOX2	-0.923172	-0.328334	-0.15935	-0.673678	-0.46208	0.633958	0.00527961	0.446671	0.975446	0.0542817	0.231256	0.576483
BnaC03g38300D	photorespiration	perox	AT3G14150	Aldolase-type TIM barrel family protein	HAOX2	-0.271475	-0.0249395	0.424481	-0.523476	-1.24445	-1.20366	0.682108	0.9929	0.748504	0.424438	0.0351821	0.214921
BnaA09g31220D	photorespiration	perox	AT1G23310	AOAT1_GGAT1_GGT1__glutamate:glyoxylate aminotransferase	GGT1	-0.407045	-0.769387	0.0164758	-0.449274	-0.665213	0.153964	0.1487	0.0062146	1	0.127206	0.0181988	0.852219
BnaC07g13140D	photorespiration	perox	AT1G23310	AOAT1_GGAT1_GGT1__glutamate:glyoxylate aminotransferase	GGT1	-0.126835	1.27327	1.35166	-0.733641	1.23322	-0.508894	0.940824	0.429537	0.475224	0.665105	0.446835	0.886644
BnaA07g10020D	photorespiration	perox	AT1G23310	AOAT1_GGAT1_GGT1__glutamate:glyoxylate aminotransferase	GGT1	-1.61753	-4.35407	0.144698	-0.0842399	-1.47502	-2.88331	0.334215	0.0243057	1	1	0.535888	0.280026
BnaC05g18600D	photorespiration	perox	AT1G23310	AOAT1_GGAT1_GGT1__glutamate:glyoxylate aminotransferase	GGT1	-0.981873	-1.03924	-0.159735	-1.1284	-1.02479	0.10071	0.00266473	0.00237049	0.878445	0.000912473	0.00263082	0.963341
BnaA07g10010D	photorespiration	perox	AT1G23310	AOAT1_GGAT1_GGT1__glutamate:glyoxylate aminotransferase	GGT1	-0.0408157	-2.28896	0.0591636	0.0229458	0.0109332	1.75227	1	0.293154	1	1	1	0.383973
BnaC08g06270D	photorespiration	perox	AT1G23310	AOAT1_GGAT1_GGT1__glutamate:glyoxylate aminotransferase	GGT1	0.332888	-0.28499	-0.0270976	0.170233	-0.707565	0.206712	0.416884	0.565424	1	0.739878	0.0784821	0.86182
BnaA08g20540D	photorespiration	perox	AT1G23310	AOAT1_GGAT1_GGT1__glutamate:glyoxylate aminotransferase	GGT1	0.219483	-0.592011	-0.116136	0.0244125	-0.537868	0.415385	0.55225	0.0982361	0.931392	0.985112	0.128701	0.524989
BnaAnng22050D	photorespiration	perox	AT1G70580	AOAT2_GGT2__alanine-2-oxoglutarate aminotransferase 2	GGT2	-1.12479	0.0247402	0.482311	-1.1132	-0.674799	0.476578	0.00578095	0.985753	0.555626	0.00866408	0.151297	0.606581
BnaC06g43710D	photorespiration	perox	AT1G70580	AOAT2_GGT2__alanine-2-oxoglutarate aminotransferase 2	GGT2	-0.828651	-0.43426	-0.113659	-1.11759	-0.542026	0.615008	0.0369055	0.374146	0.959218	0.00515149	0.228697	0.383079
BnaC01g39310D	photorespiration	perox	AT3G08860	PYD4__PYRIMIDINE 4	PYD4	0.429411	0.758279	-2.25135	0.623375	1.61691	-2.20131	0.440981	0.191762	0.638434	0.267654	0.00150478	0.725771
BnaA01g32260D	photorespiration	perox	AT3G08860	PYD4__PYRIMIDINE 4	PYD4	1.05646	1.32723	0.0214743	0.626759	1.03338	-0.0303552	0.00485629	0.00143075	1	0.122459	0.0076811	1
BnaC03g36340D	photorespiration	perox	AT3G08860	PYD4__PYRIMIDINE 4	PYD4	-0.144776	0.60874	6.039	-0.204622	1.06998	5.89389	0.927254	0.699933	0.000709265	0.910335	0.395338	0.0262672
BnaC03g36350D	photorespiration	perox	AT3G08860	PYD4__PYRIMIDINE 4	PYD4	-0.506736	0.238258	7.80697	-0.00600395	1.01088	3.71096	0.615119	0.868677	6.69984e-05	1	0.313577	0.35003
BnaA01g03860D	photorespiration	mito	AT4G33010	AtGLDP1_GLDP1__glycine decarboxylase P-protein 1	AtGDP1	-2.47364	-0.94882	-0.19081	-2.28177	-1.53367	0.37816	5.58776e-09	0.0497635	0.903177	1.09021e-07	0.000595389	0.727542
BnaC01g05230D	photorespiration	mito	AT4G33010	AtGLDP1_GLDP1__glycine decarboxylase P-protein 1	AtGDP1	-2.26309	-0.678155	-0.0161335	-1.89741	-0.991327	0.273525	1.81963e-10	0.107423	1	1.30636e-07	0.0102088	0.786011
	photorespiration	mito	AT2G26080	AtGLDP2_GLDP2__glycine decarboxylase P-protein 2	AtGDP2
BnaC04g09770D	photorespiration	mito	AT2G35370	GDCH__glycine decarboxylase complex H	AtGDH1	-1.76551	-0.36717	1.79343	-0.648836	-1.162	0.744016	0.00747571	0.68266	0.00115841	0.356267	0.0682594	0.359174
BnaA05g34950D	photorespiration	mito	AT2G35370	GDCH__glycine decarboxylase complex H	AtGDH1	-2.4283	-2.59408	1.21974	-2.09877	-0.467456	0.76007	0.161877	0.202067	0.083283	0.15705	0.779241	0.450346
BnaA03g16100D	photorespiration	mito	AT2G35120	Single hybrid motif superfamily protein	AtGDH2	-0.797921	-0.170356	1.51826	-1.05455	-1.1237	-0.419543	0.0703242	0.803206	0.0126059	0.0179211	0.0135341	0.725771
BnaC03g19300D	photorespiration	mito	AT2G35120	Single hybrid motif superfamily protein	AtGDH2	-0.997509	-1.88601	-0.924698	-0.90306	-0.96466	0.229454	0.0516126	0.000342714	0.287134	0.0980774	0.083612	0.928106
BnaA05g08820D	photorespiration	mito	AT2G35120	Single hybrid motif superfamily protein	AtGDH2	-0.552155	-0.122903	0.76564	-0.443884	-0.190883	0.92622	0.0735218	0.795233	0.672871	0.187436	0.641101	0.632451
BnaC04g10230D	photorespiration	mito	AT2G35120	Single hybrid motif superfamily protein	AtGDH2	-0.25722	-0.0332666	2.00811	-0.317225	-0.150855	-0.878993	0.365156	0.950858	0.0437543	0.283289	0.669265	0.602082
BnaAnng15720D	photorespiration	mito	AT2G35120	Single hybrid motif superfamily protein	AtGDH2	-1.29089	-0.526292	3.13382	-2.48305	-1.57632	-3.85129	0.0103918	0.40073	0.436717	0.00379279	0.0520932	0.339004
BnaC05g24600D	photorespiration	plastid	AT1G32470	Single hybrid motif superfamily protein	AtGDH3	0.155742	0.420233	-0.0677375	-0.710168	0.204841	-0.0551189	0.670779	0.217117	0.97331	0.0270331	0.589764	0.997991
BnaC08g07440D	photorespiration	plastid	AT1G32470	Single hybrid motif superfamily protein	AtGDH3	-1.73503	-0.964536	-0.219591	-1.22889	0.0601873	-0.0336784	0.00504732	0.187817	0.774203	0.0931883	0.974476	1
BnaC05g28570D	photorespiration	plastid	AT1G32470	Single hybrid motif superfamily protein	AtGDH3	0.00132297	0.0526541	0.40897	-0.497263	-0.831	0.157537	1	0.952457	0.636775	0.28862	0.0629499	0.934992
BnaAnng37640D	photorespiration	plastid	AT1G32470	Single hybrid motif superfamily protein	AtGDH3	2.82977	-0.765827	-0.0855487	-1.214	2.66328	-0.012537	0.0721702	0.612574	0.957945	0.498304	0.181764	1
BnaA09g24310D	photorespiration	plastid	AT1G32470	Single hybrid motif superfamily protein	AtGDH3	0.0858579	0.633666	-0.160163	-0.54789	0.800458	0.0629084	0.84072	0.0593718	0.828938	0.136643	0.0117992	0.988885
BnaA05g18150D	photorespiration	plastid	AT1G32470	Single hybrid motif superfamily protein	AtGDH3	-0.461626	-0.982209	-1.47223	-0.920136	-0.467157	-0.0120068	0.781921	0.57837	0.588298	0.647414	0.829861	1
BnaC06g01550D	PR/ PDH	mito	AT1G48030	mtLPD1__mitochondrial lipoamide dehydrogenase 1	AtmLPD1/E3	-0.920663	-0.460751	-0.0915933	-0.650086	-0.291479	0.279992	0.000179686	0.116217	0.935849	0.0129482	0.348027	0.629924
BnaA06g04090D	PR/ PDH	mito	AT1G48030	mtLPD1__mitochondrial lipoamide dehydrogenase 1	AtmLPD1/E3	-0.901262	-1.14538	-0.0362215	-0.807677	-0.444264	0.250295	0.0197225	0.00528356	1	0.047076	0.342265	0.828224
BnaC05g36150D	PR/ PDH	mito	AT3G17240	mtLPD2__lipoamide dehydrogenase 2	AtmLPD2/E3	-1.12775	-0.513846	-0.434796	-0.841447	-0.586345	0.0357636	7.10259e-06	0.08457	0.334228	0.00138016	0.0386856	1
BnaA05g22860D	PR/ PDH	mito	AT3G17240	mtLPD2__lipoamide dehydrogenase 2	AtmLPD2/E3	-0.517446	0.0466776	0.26729	-0.108766	-0.419527	-0.961007	0.326089	0.967393	0.855867	0.894937	0.48954	0.244555
BnaC05g36200D	PR/ PDH	mito	AT3G17240	mtLPD2__lipoamide dehydrogenase 2	AtmLPD2/E3	-0.801161	-0.6018	-0.203908	-0.842516	0.389166	0.242593	0.186621	0.414714	0.951095	0.191216	0.61516	0.942721
BnaA08g25100D	photorespiration	mito	AT1G11860	Glycine cleavage T-protein family	AtGDT1	-1.29024	-1.05469	-0.0893892	-2.05985	-1.68151	0.243065	1.65445e-05	0.00130307	0.960982	2.36124e-10	2.58233e-07	0.759993
BnaA09g47510D	photorespiration	mito	AT1G11860	Glycine cleavage T-protein family	AtGDT1	-1.53136	-0.62014	-0.00569866	-1.31599	-0.822984	0.196287	8.29663e-09	0.0448508	1	1.3023e-06	0.00458133	0.8037
BnaC08g41790D	photorespiration	mito	AT1G11860	Glycine cleavage T-protein family	AtGDT1	-1.16169	-0.22454	-0.128744	-0.867262	-0.36109	0.096381	8.13279e-05	0.595453	0.911475	0.00513007	0.327998	0.963015
BnaC08g15110D	photorespiration	mito	AT1G11860	Glycine cleavage T-protein family	AtGDT1	-1.55355	-1.09731	-0.0882277	-0.806286	-0.589163	0.120984	0.000101738	0.0135762	0.987601	0.0660854	0.217622	0.969969
BnaA01g00170D	photorespiration	mito	AT4G37930	SHM1_SHMT1_STM__serine transhydroxymethyltransferase 1	AtSHM1	0.142063	0.443512	-0.243555	0.0105467	-0.122484	0.103561	0.681786	0.179836	0.694753	1	0.769575	0.943456
BnaC01g01090D	photorespiration	mito	AT4G37930	SHM1_SHMT1_STM__serine transhydroxymethyltransferase 1	AtSHM1	0.436537	0.196544	-0.228144	0.223508	-0.0869767	0.146292	0.129156	0.606754	0.714545	0.515446	0.842894	0.874959
BnaC03g61150D	photorespiration	mito	AT4G37930	SHM1_SHMT1_STM__serine transhydroxymethyltransferase 1	AtSHM1	-0.0532433	-1.18614	-0.00932917	-0.998131	-0.292923	0.257812	0.924638	0.00408791	1	0.00820432	0.528401	0.725771
BnaA08g15890D	photorespiration	mito	AT4G37930	SHM1_SHMT1_STM__serine transhydroxymethyltransferase 1	AtSHM1	-0.162423	-0.693561	0.122664	-0.864498	-0.677073	0.334579	0.77959	0.205814	0.920704	0.184771	0.239867	0.63189
BnaC06g32430D	photorespiration	mito	AT5G26780	SHM2__serine hydroxymethyltransferase 2	AtSHM2	-1.67847	-0.84943	-0.162221	-1.5815	-1.06758	-0.00673282	4.51939e-11	0.00260591	0.841263	1.11709e-09	8.84696e-05	1
BnaCnng17010D	photorespiration	mito	AT5G26780	SHM2__serine hydroxymethyltransferase 2	AtSHM2	-1.22055	-0.53305	0.00582372	-0.708219	-0.595624	-0.213768	4.53721e-07	0.0609775	1	0.00595859	0.0285468	0.755531
BnaA07g29260D	photorespiration	mito	AT5G26780	SHM2__serine hydroxymethyltransferase 2	AtSHM2	-1.5432	-0.781979	0.211874	-1.44383	-1.36804	-0.507044	0.000190203	0.109005	0.916275	0.00168203	0.00433558	0.720132
BnaA07g23560D	photorespiration	mito	AT5G26780	SHM2__serine hydroxymethyltransferase 2	AtSHM2	-1.41979	-0.346078	-0.115366	-0.436316	0.380755	0.356225	0.000136003	0.493921	0.960348	0.331914	0.425945	0.724127
BnaC01g06000D	photorespiration	plastid	AT4G32520	AtSHMT3_SHM3__serine hydroxymethyltransferase 3	AtSHM3	-0.654369	-0.0531372	-0.690491	-0.207962	0.0109089	-0.384768	0.0243436	0.923943	0.0981238	0.574823	1	0.534641
BnaC03g67280D	photorespiration	plastid	AT4G32520	AtSHMT3_SHM3__serine hydroxymethyltransferase 3	AtSHM3	-0.90557	-0.690559	-0.911839	-0.472435	-0.996737	-0.975224	0.000545413	0.0195576	0.00775668	0.109472	0.000349783	0.00491002
BnaA08g12180D	photorespiration	plastid	AT4G32520	AtSHMT3_SHM3__serine hydroxymethyltransferase 3	AtSHM3	-1.31987	-1.53684	-1.10415	-1.05633	-0.750643	-0.744767	0.00650982	0.0025248	0.102274	0.0398479	0.183682	0.408377
	photorespiration	cytosol	AT4G13890	EDA36_EDA37_SHM5__Pyridoxal phosphate (PLP)-dependent transferases superfamily protein	AtSHM5
BnaA04g06460D	photorespiration	cytosol	AT4G13930	SHM4__serine hydroxymethyltransferase 4	AtSHM4	-0.940399	-0.0514867	-0.31078	-0.493907	-0.411471	-0.408427	0.000374516	0.920352	0.575697	0.0942179	0.191498	0.440761
BnaCnng62500D	photorespiration	cytosol	AT4G13930	SHM4__serine hydroxymethyltransferase 4	AtSHM4	-1.43155	-0.87697	-0.466041	-1.08989	-0.92832	-0.406872	1.1301e-05	0.0168547	0.449201	0.00132966	0.00914619	0.589271
BnaCnng19300D	photorespiration	cytosol	AT4G13930	SHM4__serine hydroxymethyltransferase 4	AtSHM4	-0.969155	-0.00318473	-0.448747	-0.389788	-0.0574531	-0.0601102	0.00202567	1	0.439298	0.293997	0.926139	1
BnaAnng08840D	photorespiration	cytosol	AT4G13930	SHM4__serine hydroxymethyltransferase 4	AtSHM4	-2.10104	-0.87361	-0.562873	-1.54936	-1.1129	-0.330515	1.59725e-10	0.0185386	0.324595	3.7059e-06	0.00158152	0.694907
BnaC05g17330D	photorespiration	cytosol	AT1G22020	SHM6__serine hydroxymethyltransferase 6	AtSHM6	0.435544	0.039764	0.0121598	0.492333	0.0620194	-0.120125	0.123496	0.943088	1	0.091367	0.896497	0.919442
BnaC08g20110D	photorespiration	cytosol	AT1G22020	SHM6__serine hydroxymethyltransferase 6	AtSHM6	-0.560312	-0.407924	-0.0725811	-0.389285	-0.394247	0.089778	0.0823247	0.280524	0.981114	0.281479	0.28454	0.972369
BnaAnng04180D	photorespiration	cytosol	AT1G22020	SHM6__serine hydroxymethyltransferase 6	AtSHM6	0.676609	0.00984317	-0.262597	0.705191	0.0410406	-0.0494674	0.000291952	0.991	0.478726	0.000247615	0.907499	0.986243
BnaA08g21010D	photorespiration	cytosol	AT1G22020	SHM6__serine hydroxymethyltransferase 6	AtSHM6	0.170012	-0.137963	0.0694396	0.2142	0.169202	0.659475	0.756786	0.845849	1	0.720306	0.794411	0.426466
BnaC08g06530D	photorespiration	cytosol	AT1G36370	SHM7__serine hydroxymethyltransferase 7	AtSHM7	2.20309	-0.633788	-0.303972	2.10204	-0.525408	-1.4122	3.49373e-07	0.233297	0.787176	1.81133e-06	0.323955	0.018347
BnaA08g06130D	photorespiration	cytosol	AT1G36370	SHM7__serine hydroxymethyltransferase 7	AtSHM7	2.05009	-1.02205	-0.218607	1.9817	-1.17117	-1.37783	4.38313e-05	0.0759582	0.908787	0.000116355	0.0331661	0.0619574
BnaAnng38990D	photorespiration	cytosol	AT1G36370	SHM7__serine hydroxymethyltransferase 7	AtSHM7	1.07735	0.252098	-0.0477043	-0.0108794	-0.00328019	-0.0228259	0.18165	0.83552	1	1	1	1
BnaC03g45180D	photorespiration	perox	AT2G13360	AGT_AGT1_SGAT__alanine:glyoxylate aminotransferase	AGT1	1.19583	0.0131671	0.139809	-0.209969	-1.12987	0.110163	0.00757504	1	0.933625	0.720876	0.0151652	0.97322
BnaA03g38340D	photorespiration	perox	AT2G13360	AGT_AGT1_SGAT__alanine:glyoxylate aminotransferase	AGT1	1.28606	-0.663149	0.0965351	0.766637	-1.21879	0.120602	0.000435445	0.184318	0.965919	0.0579106	0.00637484	0.951127
BnaA09g08290D	photorespiration	perox	AT2G13360	AGT_AGT1_SGAT__alanine:glyoxylate aminotransferase	AGT1	3.34459	1.46434	-0.0116586	2.42857	0.888206	0.158155	6.68766e-20	0.000125084	1	1.94535e-11	0.0252172	0.920756
BnaC09g08540D	photorespiration	perox	AT2G13360	AGT_AGT1_SGAT__alanine:glyoxylate aminotransferase	AGT1	2.14674	0.576912	0.057166	0.800864	-0.0942467	0.173477	8.05846e-10	0.177612	1	0.0352074	0.878707	0.898006
BnaC03g76360D	photorespiration	perox	AT4G39660	AGT2__alanine:glyoxylate aminotransferase 2	AGT2	2.43646	-1.28742	-0.252364	1.11536	-2.11645	-0.0416294	6.24617e-05	0.0623385	0.927842	0.0922145	0.0010255	1
BnaA08g16370D	photorespiration	perox	AT4G39660	AGT2__alanine:glyoxylate aminotransferase 2	AGT2	2.56445	-0.248818	-0.141314	1.61872	-1.02121	-0.225379	1.65365e-09	0.696778	0.951929	0.000192035	0.0308614	0.891231
BnaC01g00550D	photorespiration	perox	AT4G39660	AGT2__alanine:glyoxylate aminotransferase 2	AGT2	-1.12311	-1.61289	-0.21787	-1.05173	-1.46142	0.283135	0.00194382	2.68275e-05	0.844617	0.00411136	7.41249e-05	0.772899
BnaA01g05670D	photorespiration	perox	AT4G39660	AGT2__alanine:glyoxylate aminotransferase 2	AGT2	-0.190717	-0.681591	0.159906	-0.870359	-1.05662	0.0686818	0.599936	0.0432878	0.871825	0.00482919	0.000707641	0.994826
BnaA03g56490D	photorespiration	perox	AT2G38400	AGT3__alanine:glyoxylate aminotransferase 3	AGT3	1.33601	-0.438067	0.546969	-0.595858	-0.676439	1.48471	0.0670229	0.65856	0.747581	0.490543	0.438776	0.198712
BnaC03g21300D	photorespiration	perox	AT2G38400	AGT3__alanine:glyoxylate aminotransferase 3	AGT3	0.885822	-0.675268	0.636457	-1.05907	-1.2355	0.975069	0.107236	0.294213	0.540313	0.0601721	0.0297126	0.295081
BnaC06g29160D	photorespiration	perox	AT1G68010	ATHPR1_HPR__hydroxypyruvate reductase	HPR1	0.654365	-1.49883	-0.203442	0.237902	-0.959371	0.796967	0.453143	0.0820385	0.969732	0.838132	0.290604	0.649058
BnaA07g26770D	photorespiration	perox	AT1G68010	ATHPR1_HPR__hydroxypyruvate reductase	HPR1	0.745478	-1.08815	-0.781657	-0.598975	-2.90103	-0.498902	0.237346	0.105091	0.469091	0.412155	5.94226e-06	0.7352
BnaA07g24840D	photorespiration	perox	AT1G68010	ATHPR1_HPR__hydroxypyruvate reductase	HPR1	1.28803	1.4074	0.333741	-0.1374	-0.573423	0.444145	0.0253885	0.0418975	0.736927	0.898867	0.462038	0.649349
BnaC06g26170D	photorespiration	perox	AT1G68010	ATHPR1_HPR__hydroxypyruvate reductase	HPR1	1.39141	0.556133	-0.0054982	-0.402377	1.25231	0.130618	0.0127653	0.536475	1	0.734659	0.312564	0.952261
BnaA07g19710D	photorespiration	cytosol	AT1G79870	D-isomer specific 2-hydroxyacid dehydrogenase family protein	HPR2	-0.228031	-0.0240304	-0.0811637	-0.290629	0.0180881	0.268649	0.426705	0.969442	0.949993	0.330681	0.98503	0.640562
BnaC06g18970D	photorespiration	cytosol	AT1G79870	D-isomer specific 2-hydroxyacid dehydrogenase family protein	HPR2	-0.0859834	-0.0379653	0.156959	0.0107738	0.175835	0.222558	0.73892	0.922448	0.747496	0.998606	0.500086	0.633698
BnaCnng33820D	photorespiration	cytosol	AT1G79870	D-isomer specific 2-hydroxyacid dehydrogenase family protein	HPR2	0.689479	0.39866	0.00631561	0.825654	-0.0780643	-0.31037	0.0423209	0.35396	1	0.0204821	0.897487	0.725771
BnaA07g35930D	photorespiration	cytosol	AT1G79870	D-isomer specific 2-hydroxyacid dehydrogenase family protein	HPR2	-0.0956445	-0.139198	-0.334826	-0.455748	0.232979	-0.058568	0.921734	0.905762	0.879056	0.610232	0.8246	1
BnaA09g47050D	photorespiration	cytosol	AT1G12550	HPR3__D-isomer specific 2-hydroxyacid dehydrogenase family protein	HPR3	2.10135	0.128353	-0.207423	1.1866	0.202637	-0.298183	3.16601e-05	0.89358	0.932981	0.0294927	0.801682	0.871936
BnaA06g08050D	photorespiration	cytosol	AT1G12550	HPR3__D-isomer specific 2-hydroxyacid dehydrogenase family protein	HPR3	0.0408176	-0.210128	-1.06797	-1.34321	-1.74877	-0.77929	0.980021	0.864537	0.380691	0.113222	0.0406128	0.709278
BnaC08g41130D	photorespiration	cytosol	AT1G12550	HPR3__D-isomer specific 2-hydroxyacid dehydrogenase family protein	HPR3	1.74743	1.10116	0.132178	-0.301623	0.155576	-1.29507	1.2115e-05	0.0155642	0.955918	0.584539	0.812369	0.100112
BnaCnng31510D	photorespiration	cytosol	AT1G12550	HPR3__D-isomer specific 2-hydroxyacid dehydrogenase family protein	HPR3	-2.81791	-1.38125	0.195198	-2.71943	-1.28704	0.145355	4.17745e-10	0.00207382	0.91518	4.3961e-08	0.00383934	0.96175
BnaC08g41120D	photorespiration	cytosol	AT1G12550	HPR3__D-isomer specific 2-hydroxyacid dehydrogenase family protein	HPR3	0.423869	-0.761319	-4.14678	0.0764526	0.245748	-0.248702	0.722744	0.576685	0.00323458	0.982795	0.876533	0.980326
BnaC06g40610D	photorespiration	plastid	AT1G80380	P-loop containing nucleoside triphosphate hydrolases superfamily protein	GLYK	1.42266	0.517942	0.0061005	-0.708602	-0.274856	-0.0372474	0.00335788	0.413757	1	0.202815	0.693643	1
BnaC06g19150D	photorespiration	plastid	AT1G80380	P-loop containing nucleoside triphosphate hydrolases superfamily protein	GLYK	2.84969	1.67338	-0.116083	1.10407	1.54446	0.0165936	2.43289e-13	4.4618e-05	0.961776	0.00635321	0.000145831	1
BnaC02g23140D	photorespiration	plastid	AT1G80380	P-loop containing nucleoside triphosphate hydrolases superfamily protein	GLYK	-0.967112	-0.200142	-0.0156159	-1.10958	-0.1125	0.0832208	0.000306559	0.606482	1	7.45323e-05	0.784815	0.962536
BnaA07g19850D	photorespiration	plastid	AT1G80380	P-loop containing nucleoside triphosphate hydrolases superfamily protein	GLYK	3.56538	1.24061	-1.19085	0.733593	2.06505	0.540677	0.000744315	0.349911	0.573927	0.561334	0.06645	0.873973
BnaA07g35670D	photorespiration	plastid	AT1G80380	P-loop containing nucleoside triphosphate hydrolases superfamily protein	GLYK	0.209323	0.0481455	-0.0232366	-0.751074	0.55275	0.671149	0.890364	0.993345	1	0.586535	0.718539	0.837668
BnaA02g19770D	photorespiration	plastid	AT1G80380	P-loop containing nucleoside triphosphate hydrolases superfamily protein	GLYK	-0.295867	-0.0877289	-0.10372	0.0670949	0.516939	-0.0114115	0.289707	0.83767	0.908897	0.873419	0.0703903	1

## Sheet: starch+sucrose
ID	pathway	localization	AGI	annotation	Name	logFC.Root_H4h_AV	logFC.Root_H24h_AV	logFC.Leaf_H24h_AV	logFC.Root_H4h_ZS	logFC.Root_H24h_ZS	logFC.Leaf_H24h_ZS	FDR.Root_H4h_AV	FDR.Root_H24h_AV	FDR.Leaf_H24h_AV	FDR.Root_H4h_ZS	FDR.Root_H24h_ZS	FDR.Leaf_H24h_ZS
BnaA03g55140D	starch	plastid	AT5G51820	ATPGMP_PGM_PGM1_STF1__phosphoglucomutase	PGM1	0.105372	-0.0637364	-0.135314	-2.41585	-0.515356	-0.0180692	0.866684	0.945711	0.960348	0.231312	0.836014	1
BnaCnng44490D	starch	plastid	AT5G51820	ATPGMP_PGM_PGM1_STF1__phosphoglucomutase	PGM1	-0.452143	-0.364005	-0.2266	-0.371328	-0.610611	0.00675374	0.0338373	0.14236	0.583736	0.110122	0.00686536	1
BnaAnng22150D	starch	plastid	AT5G51820	ATPGMP_PGM_PGM1_STF1__phosphoglucomutase	PGM1	0.922511	1.21058	1.04042	0.0150063	0.00656352	-0.0139001	0.0953333	0.0495511	0.301969	1	1	1
BnaC01g19570D	starch	plastid	AT5G51820	ATPGMP_PGM_PGM1_STF1__phosphoglucomutase	PGM1	-0.0371852	0.108231	0.252527	-0.698788	0.146254	-0.112736	0.956786	0.869474	0.869667	0.133221	0.814074	0.998712
BnaA09g11560D	starch	plastid	AT5G51820	ATPGMP_PGM_PGM1_STF1__phosphoglucomutase	PGM1	0.922511	1.21058	1.04042	0.0150063	0.00656352	-0.0139001	0.0953333	0.0495511	0.301969	1	1	1
BnaA10g07730D	starch	plastid	AT5G51820	ATPGMP_PGM_PGM1_STF1__phosphoglucomutase	PGM1	0.153381	-0.311813	-0.137316	0.101072	-0.914966	0.0349114	0.584104	0.294549	0.820843	0.772167	0.000315518	1
BnaCnng50760D	starch	plastid	AT5G51820	ATPGMP_PGM_PGM1_STF1__phosphoglucomutase	PGM1	0.922511	1.21058	1.04042	0.0150064	0.00656353	-0.0139002	0.0953333	0.0495511	0.301969	1	1	1
	starch	plastid	AT1G70730	PGM2__Phosphoglucomutase/phosphomannomutase family protein	PGM2
BnaC08g06210D	starch	cytosol	AT1G23190	PGM3__Phosphoglucomutase/phosphomannomutase family protein	PGM3	-1.09294	-0.483154	-0.339629	-0.618884	-0.478569	-0.0130329	4.56531e-05	0.135343	0.5319	0.0341719	0.128513	1
BnaA08g20600D	starch	cytosol	AT1G23190	PGM3__Phosphoglucomutase/phosphomannomutase family protein	PGM3	-0.586996	-0.65666	-0.741676	-0.174527	-0.060418	0.601802	0.346283	0.354199	0.478538	0.841536	0.964708	0.646863
BnaC05g18490D	starch	cytosol	AT1G23190	PGM3__Phosphoglucomutase/phosphomannomutase family protein	PGM3	-1.37669	-0.726703	0.0611975	-0.889465	-0.623057	0.445175	1.27211e-09	0.0041056	0.974849	0.000169445	0.0138478	0.288485
BnaA09g30060D	starch	cytosol	AT1G23190	PGM3__Phosphoglucomutase/phosphomannomutase family protein	PGM3	-0.267045	0.201745	0.0429996	0.11226	0.390891	0.235034	0.268226	0.490873	0.995814	0.714812	0.115554	0.647695
BnaC09g54280D	starch	plastid	AT5G19220	ADG2_APL1__ADP glucose pyrophosphorylase large subunit 1	APL1	-1.6631	0.704112	-0.330835	-3.1706	-1.86744	0.0623618	0.0840903	0.659127	0.583135	0.000369678	0.00632365	0.997991
BnaAnng08760D	starch	plastid	AT5G19220	ADG2_APL1__ADP glucose pyrophosphorylase large subunit 1	APL1	0.213405	-1.80011	0.315437	-0.764219	2.67494	-0.38455	0.891714	0.272531	0.796782	0.724683	0.182905	0.756784
BnaA10g15850D	starch	plastid	AT5G19220	ADG2_APL1__ADP glucose pyrophosphorylase large subunit 1	APL1	0.450814	-0.323544	-0.194489	0.0970442	0.33568	0.0523713	0.602722	0.771065	0.754747	0.963468	0.731283	1
BnaC02g08620D	starch	plastid	AT5G19220	ADG2_APL1__ADP glucose pyrophosphorylase large subunit 1	APL1	-0.460573	0.0910823	0.433963	0.155509	0.972189	0.798124	0.817429	0.985991	0.962112	0.970658	0.640639	0.877509
BnaA09g27810D	starch	plastid	AT1G27680	APL2__ADPGLC-PPase large subunit	APL2	-0.123288	-0.208847	0.494881	0.23767	-0.364541	0.241356	0.719059	0.600291	0.317894	0.47631	0.28655	0.758176
BnaC03g58050D	starch	plastid	AT1G27680	APL2__ADPGLC-PPase large subunit	APL2	-0.0984909	0.420767	0.399442	-1.76357	-0.261459	1.0627	0.954455	0.758492	0.960028	0.0354669	0.828923	0.466983
BnaC05g21440D	starch	plastid	AT1G27680	APL2__ADPGLC-PPase large subunit	APL2	-0.539024	-0.137302	0.347473	-0.321931	-0.322472	0.19486	0.0203329	0.695891	0.440327	0.228211	0.252703	0.771537
BnaC07g47330D	starch	plastid	AT4G39210	APL3__Glucose-1-phosphate adenylyltransferase family protein	APL3	-1.06038	0.0669943	0.241174	-0.320999	-1.31723	-0.111843	0.0634173	0.959354	0.904346	0.675744	0.0867426	1
BnaA06g40730D	starch	plastid	AT4G39210	APL3__Glucose-1-phosphate adenylyltransferase family protein	APL3	-1.39855	-1.20407	0.455982	-2.05481	-0.765809	1.35279	0.00495152	0.0548738	0.638434	6.61592e-05	0.253613	0.0266451
BnaA09g05340D	starch	plastid	AT2G21590	APL4__Glucose-1-phosphate adenylyltransferase family protein	APL4	0.628074	-0.102223	0.112793	0.433958	0.774564	0.888059	0.179486	0.894945	0.981502	0.723263	0.677625	0.52984
BnaA04g12270D	starch	plastid	AT2G21590	APL4__Glucose-1-phosphate adenylyltransferase family protein	APL4	-0.870252	-1.37543	0.389609	-0.711901	-1.39253	0.228684	0.0889153	0.00899749	0.682055	0.27952	0.0199196	0.870345
BnaC04g33380D	starch	plastid	AT2G21590	APL4__Glucose-1-phosphate adenylyltransferase family protein	APL4	-1.19509	-1.11526	0.875967	-1.6011	-2.27905	0.254883	0.00844259	0.0152777	0.121951	0.00112277	3.5747e-07	0.828427
BnaA06g30310D	starch	plastid	AT5G48300	ADG1_APS1__ADP glucose pyrophosphorylase 1	APS1	-1.16489	-0.792101	0.365488	-1.00147	-0.853891	0.057523	0.000585164	0.0413438	0.638434	0.00544687	0.0283484	1
BnaA07g04740D	starch	plastid	AT5G48300	ADG1_APS1__ADP glucose pyrophosphorylase 1	APS1	2.03289	2.69256	-0.278275	1.84711	1.40478	-0.764991	0.000888849	0.000117036	0.896623	0.0039729	0.0588086	0.564782
BnaCnng59960D	starch	plastid	AT5G48300	ADG1_APS1__ADP glucose pyrophosphorylase 1	APS1	-0.948579	-0.488973	0.689583	-0.89746	-0.633472	-0.0564017	0.000238716	0.112361	0.0656501	0.000833519	0.0291409	1
BnaCnng00430D	starch	plastid	AT5G48300	ADG1_APS1__ADP glucose pyrophosphorylase 1	APS1	-0.460781	0.378614	0.064079	0.174718	0.113992	0.0386186	0.0873216	0.286126	0.973569	0.602569	0.788251	1
BnaA10g03820D	starch	plastid	AT1G05610	APS2__ADP-glucose pyrophosphorylase small subunit 2	APS2	0.388244	-0.111751	0.170036	0.458809	0.131191	-0.557385	0.527811	0.908538	0.978227	0.476548	0.883427	0.810856
BnaC07g30160D	starch	plastid	AT5G24300	ATSS1_SS1__Glycogen/starch synthases, ADP-glucose type	SS1	-0.388101	-1.09977	-0.0757966	-0.23252	-1.08256	0.0644725	0.106978	2.90274e-06	0.93678	0.42402	8.70863e-06	0.967966
BnaA06g26820D	starch	plastid	AT5G24300	ATSS1_SS1__Glycogen/starch synthases, ADP-glucose type	SS1	0.515399	0.444338	-0.0613569	0.685356	0.532712	0.112569	0.0673464	0.180893	0.984281	0.0155454	0.0877777	0.925478
BnaA01g33320D	starch	plastid	AT3G01180	AtSS2_SS2__starch synthase 2	SS2	-1.49789	-1.1333	0.629428	-1.2909	-0.450618	-0.205262	0.00227635	0.0411874	0.499146	0.0135232	0.48131	1
BnaC05g48670D	starch	plastid	AT3G01180	AtSS2_SS2__starch synthase 2	SS2	0.834906	-0.405889	0.00070981	1.80226	0.59512	0.311275	0.00615668	0.285056	1	0.00635373	0.579181	0.817181
BnaCnng29150D	starch	plastid	AT3G01180	AtSS2_SS2__starch synthase 2	SS2	-0.397927	-0.908918	0.706758	0.172894	-0.183263	-0.074356	0.353655	0.049985	0.163379	0.749198	0.752146	0.994463
BnaA05g34030D	starch	plastid	AT3G01180	AtSS2_SS2__starch synthase 2	SS2	0.181239	-0.655334	-0.138164	0.256741	-0.463334	0.147741	0.613014	0.0512176	0.888462	0.476966	0.171823	0.886346
BnaCnng18120D	starch	cytosol	AT1G11720	ATSS3_SS3__starch synthase 3	SS3	0.966099	0.138877	0.833466	0.668908	0.0865089	0.92279	0.00148149	0.773359	0.0431445	0.0435719	0.869276	0.028585
BnaC08g15040D	starch	cytosol	AT1G11720	ATSS3_SS3__starch synthase 3	SS3	0.672939	0.25876	-0.282054	0.563146	-0.0512274	0.0760474	0.0298279	0.531826	0.665349	0.0913078	0.933516	0.984951
BnaA06g07310D	starch	cytosol	AT1G11720	ATSS3_SS3__starch synthase 3	SS3	-0.689624	-0.065929	0.822955	-0.705231	-0.413672	-0.13552	0.0636718	0.925209	0.0979329	0.0838889	0.378476	0.944762
BnaA08g25180D	starch	cytosol	AT1G11720	ATSS3_SS3__starch synthase 3	SS3	-0.0617013	0.00245486	-0.261072	-0.438273	-0.660027	0.158378	0.909366	1	0.771171	0.304269	0.10815	0.915338
BnaC08g11320D	starch	plastid	AT4G18240	ATSS4_SS4_SSIV__starch synthase 4	SS4	0.188823	0.107502	0.0209913	0.239394	0.0105455	0.0406292	0.537855	0.799717	1	0.452692	1	1
BnaA08g08660D	starch	plastid	AT4G18240	ATSS4_SS4_SSIV__starch synthase 4	SS4	0.149545	-0.185391	-0.138249	0.211903	-0.433784	0.194962	0.577658	0.567291	0.815429	0.440884	0.10562	0.725771
BnaA06g24640D	starch	plastid	AT5G65685	ATSS5	SS5	-0.997591	-0.553157	-0.276033	-0.425862	-0.408216	-0.198559	1.93889e-05	0.0432818	0.537549	0.113456	0.148658	0.727393
BnaCnng13270D	starch	plastid	AT5G65685	ATSS5	SS5	-0.574573	-0.200784	0.171515	-0.161604	-0.206867	0.137552	0.00985146	0.506835	0.734726	0.576815	0.473476	0.832349
BnaC05g28320D	starch	plastid	AT1G32900	GBSS1__UDP-Glycosyltransferase superfamily protein	GBSS1	-0.00851271	-0.436501	-0.12523	0.278903	-0.267743	0.333227	0.995581	0.198713	0.900305	0.424129	0.458271	0.591832
BnaC05g28330D	starch	plastid	AT1G32900	GBSS1__UDP-Glycosyltransferase superfamily protein	GBSS1	0.127533	-0.574558	0.155807	0.341699	-0.046756	0.329483	0.723449	0.0736847	0.850516	0.302018	0.933516	0.593548
BnaAnng38950D	starch	plastid	AT1G32900	GBSS1__UDP-Glycosyltransferase superfamily protein	GBSS1	0.429401	-0.853903	-0.508226	0.979169	0.395045	0.373669	0.32424	0.0513927	0.472025	0.0141829	0.409396	0.689363
BnaC01g22960D	starch	cell wall	AT4G25000	AMY1_ATAMY1__alpha-amylase-like	AMY1	-1.76205	0.0603885	-0.53697	-0.513972	-0.403841	0.335999	0.0227532	0.975522	0.780784	0.577178	0.684431	0.930258
BnaC06g36810D	starch	cytosol	AT1G76130	AMY2_ATAMY2__alpha-amylase-like 2	AMY2	1.12203	1.27432	-0.964669	0.264363	0.158109	-0.253056	0.0456831	0.0370196	0.286703	0.731139	0.860059	0.906554
BnaA07g32360D	starch	cytosol	AT1G76130	AMY2_ATAMY2__alpha-amylase-like 2	AMY2	0.31426	-0.00248494	-1.51575	0.141037	0.124249	-0.369063	0.439412	1	0.000364857	0.790873	0.822853	0.658913
BnaC06g30880D	starch	plastid	AT1G69830	AMY3_ATAMY3__alpha-amylase-like 3	AMY3	-0.320191	-0.374496	-0.157128	-0.714007	0.0472051	0.303586	0.256458	0.276997	0.822669	0.00702302	0.931905	0.59143
BnaA07g28350D	starch	plastid	AT1G69830	AMY3_ATAMY3__alpha-amylase-like 3	AMY3	-0.99012	-1.69357	-0.0103857	-0.0432635	-0.310222	-0.586308	0.011762	9.21014e-05	1	0.969505	0.582141	0.442958
BnaC03g78310D	starch	cytosol	AT4G15210	AT-BETA-AMY_ATBETA-AMY_BAM5_BMY1_RAM1__beta-amylase 5	BMY1	-1.43407	-1.81337	-0.0120189	-1.1291	-1.9172	-0.0103237	0.00758954	0.00168648	1	0.0493848	0.000696124	1
BnaCnng71190D	starch	cytosol	AT4G15210	AT-BETA-AMY_ATBETA-AMY_BAM5_BMY1_RAM1__beta-amylase 5	BMY1	-0.472195	0.141046	0.505927	0.518183	0.697816	0.971976	0.575409	0.913752	0.740344	0.561722	0.431706	0.45108
BnaC03g78320D	starch	cytosol	AT4G15210	AT-BETA-AMY_ATBETA-AMY_BAM5_BMY1_RAM1__beta-amylase 5	BMY1	-1.274	-2.04091	-0.038041	-1.56223	-2.33738	0.00444576	0.0616542	0.0046079	1	0.022557	0.000671064	1
BnaCnng71250D	starch	cytosol	AT4G15210	AT-BETA-AMY_ATBETA-AMY_BAM5_BMY1_RAM1__beta-amylase 5	BMY1	0.188091	-0.390766	0.129349	0.741181	0.145917	0.871313	0.829938	0.671835	0.98803	0.333924	0.897794	0.471348
BnaA08g05660D	starch	cytosol	AT4G15210	AT-BETA-AMY_ATBETA-AMY_BAM5_BMY1_RAM1__beta-amylase 5	BMY1	0.248885	0.115747	0.351812	0.932441	0.0408891	0.738419	0.828329	0.946603	0.901256	0.348663	0.997894	0.713724
BnaA08g00480D	starch	cytosol	AT4G15210	AT-BETA-AMY_ATBETA-AMY_BAM5_BMY1_RAM1__beta-amylase 5	BMY1	-1.06541	-1.5069	-0.0277722	-0.786672	-1.23212	0.00117681	0.114319	0.036002	1	0.3003	0.099202	1
BnaC02g31510D	starch	cytosol	AT5G45300	BAM8_BMY2__beta-amylase 2	BMY2	-0.0488192	-0.0591016	-0.226389	-0.0104196	0.0703205	-0.0379545	0.872476	0.874734	0.638434	1	0.841388	1
BnaA02g36650D	starch	cytosol	AT5G45300	BAM8_BMY2__beta-amylase 2	BMY2	-0.158967	-0.279309	-0.995146	-0.0837928	-0.21792	-0.253353	0.552357	0.335699	0.000173675	0.807933	0.455168	0.638495
BnaA10g16290D	starch	plastid	AT5G18670	BAM9_BMY3__beta-amylase 3	BMY3	-0.360395	0.390932	0.161563	-0.930359	-0.673906	-0.565944	0.571452	0.600978	0.959382	0.130086	0.319156	0.664696
BnaC03g09200D	starch	plastid	AT5G18670	BAM9_BMY3__beta-amylase 3	BMY3	0.465516	-0.073059	0.225231	-0.175028	-0.171281	0.314431	0.467906	0.95086	0.920211	0.840985	0.849362	0.865187
BnaA03g07240D	starch	plastid	AT5G18670	BAM9_BMY3__beta-amylase 3	BMY3	0.240505	0.760047	0.277184	-0.714113	0.850195	1.09445	0.608553	0.0838843	0.775248	0.0941248	0.0448325	0.0457497
BnaC09g39140D	starch	plastid	AT5G18670	BAM9_BMY3__beta-amylase 3	BMY3	-0.685887	0.0500655	0.514615	-1.41328	0.0827428	0.368379	0.0770628	0.949549	0.457609	0.000166995	0.90248	0.693371
BnaC05g08020D	starch	plastid	AT5G18670	BAM9_BMY3__beta-amylase 3	BMY3	-0.210353	0.0617481	-0.511383	-0.915476	-0.81862	-0.252205	0.682483	0.944658	0.644432	0.0628361	0.108985	0.876856
BnaC04g04570D	starch	cytosol	AT2G45880	BAM7_BMY4__beta-amylase 7	BMY4	0.290954	0.088541	0.345971	0.648265	0.165159	0.201356	0.186878	0.784271	0.309294	0.00177123	0.537766	0.689564
BnaA05g05170D	starch	cytosol	AT2G45880	BAM7_BMY4__beta-amylase 7	BMY4	0.486025	-0.355977	-0.109837	0.439382	0.258126	0.540906	0.342075	0.572244	0.980326	0.426022	0.685943	0.602395
BnaC04g12480D	starch	cytosol	AT2G32290	BAM6_BMY5__beta-amylase 6	BMY5	0.934755	1.12472	-0.0523198	-0.244097	3.4161	1.21469	0.393614	0.347094	1	0.892589	0.00412663	0.366885
BnaA05g10780D	starch	cytosol	AT2G32290	BAM6_BMY5__beta-amylase 6	BMY5	0.189246	-0.00410798	0.115108	0.0290145	2.69565	1.06281	0.942958	1	1	1	0.188167	0.353811
BnaA02g08900D	starch	plastid	AT5G55700	BAM4_BMY6__beta-amylase 4	BMY6	1.26811	0.521956	0.266775	0.65514	0.568857	0.0168747	1.50152e-05	0.161222	0.713539	0.0619194	0.148472	1
BnaA03g11260D	starch	plastid	AT5G55700	BAM4_BMY6__beta-amylase 4	BMY6	0.822819	0.0848456	0.377462	0.624916	0.0642255	0.186928	0.000268785	0.830507	0.355471	0.00943571	0.877139	0.772267
BnaC03g71580D	starch	plastid	AT5G55700	BAM4_BMY6__beta-amylase 4	BMY6	1.07837	0.432569	-0.0999524	1.43348	0.609571	0.0710985	0.013319	0.463656	0.986887	0.00137868	0.26327	1
BnaC02g12830D	starch	plastid	AT5G55700	BAM4_BMY6__beta-amylase 4	BMY6	0.708944	0.366749	-0.200242	0.349673	0.311374	0.00067007	0.000747302	0.178745	0.686728	0.152374	0.259632	1
BnaC03g14120D	starch	plastid	AT5G55700	BAM4_BMY6__beta-amylase 4	BMY6	0.76354	0.28552	0.196209	0.116386	0.196439	0.0393647	0.0923507	0.650746	0.904185	0.871773	0.76433	1
BnaA07g05790D	starch	plastid	AT3G23920	BAM1_BMY7_TR-BAMY__beta-amylase 1	BMY7	-0.159454	-0.700266	-0.0914074	-0.704276	-0.611101	0.442953	0.769823	0.157295	0.98721	0.132182	0.215167	0.647908
BnaC09g21440D	starch	plastid	AT3G23920	BAM1_BMY7_TR-BAMY__beta-amylase 1	BMY7	-0.325818	-0.551951	0.0962791	-0.715604	-0.573886	0.467483	0.43341	0.20591	0.972241	0.0697357	0.173538	0.550344
BnaA03g37260D	starch	plastid	AT3G23920	BAM1_BMY7_TR-BAMY__beta-amylase 1	BMY7	0.444869	-0.190657	0.869732	-0.976246	0.26716	0.681058	0.413519	0.804263	0.269677	0.0626796	0.695129	0.494847
BnaC03g43570D	starch	plastid	AT3G23920	BAM1_BMY7_TR-BAMY__beta-amylase 1	BMY7	2.21396	0.733175	0.436882	-0.394677	-0.0575268	0.533446	0.000558271	0.37296	0.817343	0.646833	0.976029	0.765722
BnaC01g21190D	starch	plastid	AT4G17090	BAM3_BMY8_CT-BMY__chloroplast beta-amylase	BMY8	2.54189	1.30714	-0.468051	1.76023	0.185452	0.429284	7.19188e-09	0.00976027	0.583643	0.000682034	0.832892	0.663207
BnaA03g42940D	starch	plastid	AT4G17090	BAM3_BMY8_CT-BMY__chloroplast beta-amylase	BMY8	0.57362	-1.06649	-0.485881	0.387983	-0.837818	0.470951	0.290671	0.145628	0.438946	0.742616	0.419741	0.511915
BnaC07g34180D	starch	plastid	AT4G17090	BAM3_BMY8_CT-BMY__chloroplast beta-amylase	BMY8	-1.01216	-1.09223	-0.0765737	-0.684922	-0.247642	0.600597	0.328105	0.420531	0.982258	0.506621	0.879371	0.312811
BnaA01g17940D	starch	plastid	AT4G17090	BAM3_BMY8_CT-BMY__chloroplast beta-amylase	BMY8	-0.00134376	-1.70015	-0.212065	-0.779216	-1.79931	0.247894	1	0.00454134	0.783619	0.355078	0.0441777	0.75313
BnaCnng02280D	starch	plastid	AT4G00490	BAM2_BMY9__beta-amylase 2	BMY9	-0.791055	-2.22844	0.571752	-1.05412	-0.783657	0.54988	0.530738	0.0743971	0.858663	0.43814	0.604083	0.888082
BnaA09g51890D	starch	plastid	AT4G00490	BAM2_BMY9__beta-amylase 2	BMY9	-1.72667	-0.149009	1.15346	-0.868829	0.00858184	-0.186729	0.000235998	0.851793	0.0652164	0.0855865	1	0.927592
BnaA05g05660D	starch	plastid	AT2G39930	ATISA1_ISA1__isoamylase 1	ISA1	-0.832603	-0.337197	-0.0744574	-0.473847	-0.603549	0.236305	0.000156448	0.227202	0.93718	0.0495211	0.0140478	0.624857
BnaC04g05440D	starch	plastid	AT2G39930	ATISA1_ISA1__isoamylase 1	ISA1	-0.998616	-0.22068	0.28758	-0.674992	-0.725016	0.192533	0.000113415	0.543943	0.578972	0.0154439	0.0126182	0.780494
BnaC05g01880D	starch	plastid	AT1G03310	ATISA2_BE2_DBE1_ISA2__debranching enzyme 1	ISA2	-1.13505	-0.386873	-0.388044	-0.62249	-0.323578	-0.417093	4.29829e-05	0.328916	0.380749	0.0394973	0.422556	0.375899
BnaA10g01800D	starch	plastid	AT1G03310	ATISA2_BE2_DBE1_ISA2__debranching enzyme 1	ISA2	-0.383575	0.534848	0.264121	0.087179	-0.600276	0.0206142	0.358221	0.235029	0.731806	0.898552	0.206802	1
BnaC08g03940D	starch	plastid	AT4G09020	ATISA3_ISA3__isoamylase 3	ISA3	-1.16582	-0.765144	0.00220044	-0.799222	-0.922143	-0.316017	0.281368	0.584746	1	0.656846	0.520269	0.962676
BnaA03g23880D	starch	plastid	AT4G09020	ATISA3_ISA3__isoamylase 3	ISA3	-1.08078	-0.417025	0.0693516	-0.881764	-0.225274	0.748385	0.0548955	0.581689	1	0.148393	0.786778	0.513537
BnaCnng67200D	starch	plastid	AT4G09020	ATISA3_ISA3__isoamylase 3	ISA3	-0.62529	-0.483949	0.139422	-0.783857	-0.953169	0.214179	0.136836	0.340753	0.935383	0.0642678	0.0258453	0.86601
BnaC03g28400D	starch	plastid	AT4G09020	ATISA3_ISA3__isoamylase 3	ISA3	-1.07174	-0.433967	0.493664	-1.04989	-1.11761	0.412336	0.0171605	0.462694	0.563156	0.0209729	0.0163607	0.687299
BnaC05g31620D	starch	plastid	AT3G20440	BE1_EMB2729__Alpha amylase family protein	BE1	-0.979151	-0.0436088	-0.659099	-0.390977	-0.146577	-1.00287	0.00562883	0.957739	0.300484	0.35687	0.797788	0.0586889
BnaA05g36120D	starch	plastid	AT3G20440	BE1_EMB2729__Alpha amylase family protein	BE1	-0.688892	0.0539961	-0.402743	-0.40014	-0.457038	-0.837784	0.0872952	0.948657	0.66562	0.428226	0.42471	0.288516
BnaCnng02680D	starch	plastid	AT5G03650	SBE2.2__starch branching enzyme 2.2	BE2	0.977407	1.37069	0.737031	1.01866	1.66182	0.331967	0.30665	0.1833	0.70661	0.311331	0.0870029	0.937971
BnaA10g26450D	starch	plastid	AT5G03650	SBE2.2__starch branching enzyme 2.2	BE2	0.725874	1.06186	-0.416341	1.12282	0.936454	-0.436121	0.0723098	0.0126815	0.614172	0.00592569	0.0293734	0.627582
BnaAnng07370D	starch	plastid	AT2G36390	BE3_SBE2.1__starch branching enzyme 2.1	BE3	-0.87966	-0.90301	0.131548	-0.585111	-1.17756	-0.0715882	0.00089882	0.00163689	0.877163	0.0446087	2.47591e-05	0.977608
BnaC04g08890D	starch	plastid	AT2G36390	BE3_SBE2.1__starch branching enzyme 2.1	BE3	-0.321577	-0.479374	-0.265412	-0.258051	-0.748098	-0.130736	0.286011	0.136557	0.637374	0.487009	0.0324043	0.896029
BnaA05g07860D	starch	plastid	AT2G36390	BE3_SBE2.1__starch branching enzyme 2.1	BE3	-0.475955	-0.102306	0.581635	-0.530457	-0.789032	0.237608	0.10452	0.849896	0.128584	0.121618	0.0370594	0.668461
BnaA09g07040D	starch	plastid	AT5G64860	DPE1__disproportionating enzyme	DPE1	-0.991133	-0.357688	0.441427	-0.622009	-0.789636	0.115577	0.00336011	0.461006	0.601934	0.0950194	0.0582639	0.979499
BnaC09g06730D	starch	plastid	AT5G64860	DPE1__disproportionating enzyme	DPE1	-0.469054	-0.0718555	0.241749	-0.433392	-0.570513	0.10817	0.0422352	0.859424	0.638434	0.0793058	0.031314	0.909935
BnaA05g01890D	starch	plastid	AT2G40840	DPE2__disproportionating enzyme 2	DPE2	-0.586301	-0.139385	0.0159119	-0.438868	-0.50271	0.218445	0.015916	0.710606	1	0.111827	0.0889609	0.717522
BnaC04g01600D	starch	plastid	AT2G40840	DPE2__disproportionating enzyme 2	DPE2	-0.921853	-0.460104	0.260053	-0.762844	-1.21689	-0.017021	0.00127923	0.202985	0.682112	0.017434	0.000544522	1
BnaC08g14540D	starch	plastid	AT1G10760	GWD_GWD1_SEX1_SOP_SOP1__Pyruvate phosphate dikinase, PEP/pyruvate binding domain	GWD1	-0.882255	-0.0186105	0.355737	-0.89844	-0.539894	0.502544	0.0037779	0.987702	0.546123	0.00368651	0.171326	0.356414
BnaA09g47750D	starch	plastid	AT1G10760	GWD_GWD1_SEX1_SOP_SOP1__Pyruvate phosphate dikinase, PEP/pyruvate binding domain	GWD1	-0.34605	0.0295928	-0.408816	-0.28891	0.163585	0.174225	0.401464	0.977567	0.577634	0.527052	0.77404	0.898034
BnaAnng25950D	starch	plastid	AT1G10760	GWD_GWD1_SEX1_SOP_SOP1__Pyruvate phosphate dikinase, PEP/pyruvate binding domain	GWD1	0.745084	0.568167	0.373755	0.516493	1.01136	-0.0215373	0.0377076	0.177173	0.638434	0.195035	0.00659338	1
BnaAnng25960D	starch	plastid	AT1G10760	GWD_GWD1_SEX1_SOP_SOP1__Pyruvate phosphate dikinase, PEP/pyruvate binding domain	GWD1	0.758145	0.864983	-0.0214704	0.886181	1.36292	0.0215803	0.0945149	0.0828927	1	0.058113	0.00300316	1
BnaA08g25580D	starch	plastid	AT1G10760	GWD_GWD1_SEX1_SOP_SOP1__Pyruvate phosphate dikinase, PEP/pyruvate binding domain	GWD1	-0.791345	-0.43274	0.461471	-0.477784	0.66856	0.199443	0.00788316	0.255332	0.390042	0.172328	0.134363	0.850866
BnaC08g49610D	starch	plastid	AT1G10760	GWD_GWD1_SEX1_SOP_SOP1__Pyruvate phosphate dikinase, PEP/pyruvate binding domain	GWD1	-0.93063	-0.150429	-0.517456	0.141491	0.0648851	-0.0142972	0.0846421	0.871072	0.638537	0.867146	0.958885	1
BnaA01g35130D	starch	plastid	AT4G24450	ATGWD2_GWD3_PWD__phosphoglucan, water dikinase	GWD2	-0.200076	0.274908	-0.21234	-0.0745288	0.432475	0.376701	0.530738	0.433715	0.728534	0.868981	0.164063	0.467156
BnaC01g41540D	starch	plastid	AT4G24450	ATGWD2_GWD3_PWD__phosphoglucan, water dikinase	GWD2	0.765436	0.533554	-0.0216025	0.695429	0.709714	0.723496	0.00607632	0.0956423	1	0.0171706	0.0170825	0.0703927
BnaA02g31620D	starch	plastid	AT5G26570	ATGWD3_OK1_PWD__catalytics;carbohydrate kinases;phosphoglucan, water dikinases	GWD3	0.0672102	0.651783	0.0194942	0.412558	0.621799	-0.258099	0.898545	0.129027	1	0.378588	0.208004	0.848094
BnaC09g03660D	starch	plastid	AT5G26570	ATGWD3_OK1_PWD__catalytics;carbohydrate kinases;phosphoglucan, water dikinases	GWD3	0.142601	0.786708	0.248684	0.137556	0.638497	0.351649	0.725202	0.0281628	0.788484	0.766926	0.0797443	0.675368
BnaC02g48400D	starch	plastid	AT5G26570	ATGWD3_OK1_PWD__catalytics;carbohydrate kinases;phosphoglucan, water dikinases	GWD3	0.288176	0.557814	-0.62267	-0.132241	0.428033	-0.254458	0.370279	0.0987212	0.166447	0.748284	0.217414	0.73871
BnaA09g04240D	starch	plastid	AT5G26570	ATGWD3_OK1_PWD__catalytics;carbohydrate kinases;phosphoglucan, water dikinases	GWD3	0.305729	0.757098	0.291438	0.0444084	0.512707	0.0236572	0.399026	0.0347849	0.684592	0.952681	0.185597	1
BnaC02g37910D	starch	plastid	AT3G29320	PHS1__Glycosyl transferase, family 35	PHS1	-0.994745	-0.345853	0.826754	-0.539076	-0.673473	0.2048	1.89258e-06	0.234956	0.020311	0.0165307	0.00785177	0.756486
BnaA02g29830D	starch	plastid	AT3G29320	PHS1__Glycosyl transferase, family 35	PHS1	-0.749755	0.250964	0.990986	-0.745956	-0.287959	0.0508005	0.0114226	0.536432	0.0822593	0.0155194	0.462335	1
BnaC06g30230D	starch	plastid	AT3G29320	PHS1__Glycosyl transferase, family 35	PHS1	0.102624	1.03779	2.28451	0.494565	0.162938	3.598	0.970913	0.625321	0.649995	0.815817	0.958557	0.234471
BnaA06g30890D	starch	plastid	AT3G29320	PHS1__Glycosyl transferase, family 35	PHS1	-0.133536	-0.856688	-0.120745	-0.153146	-0.495996	0.200834	0.692194	0.00297614	0.894098	0.685603	0.114158	0.776696
BnaC07g25770D	starch	plastid	AT3G29320	PHS1__Glycosyl transferase, family 35	PHS1	-0.676258	-0.490709	0.39264	-0.360661	-0.575872	0.205861	0.0171145	0.145362	0.441993	0.270146	0.0725724	0.795245
BnaC03g56240D	starch	cytosol	AT3G46970	ATPHS2_PHS2__alpha-glucan phosphorylase 2	PHS2	-0.929241	-0.160182	-0.0386722	-0.548271	-0.44983	-0.046118	0.00251433	0.751706	1	0.106952	0.258692	1
BnaA06g17710D	starch	cytosol	AT3G46970	ATPHS2_PHS2__alpha-glucan phosphorylase 2	PHS2	-1.11002	-0.777701	-0.309513	-1.5714	-1.38167	-0.506436	0.0230092	0.186524	0.808599	0.00319683	0.0252582	0.649288
BnaCnng72110D	starch	cytosol	AT3G23640	HGL1__heteroglycan glucosidase 1	AGL1	-0.0331306	-0.0925587	-0.416434	0.281437	0.146465	0.24619	0.947063	0.856613	0.451592	0.453991	0.746431	0.758176
BnaCnng35950D	starch	cytosol	AT3G23640	HGL1__heteroglycan glucosidase 1	AGL1	-0.342703	-0.702253	-0.0847168	0.0646861	-0.0971778	-0.218267	0.288499	0.0302825	0.973877	0.899936	0.83448	0.833206
BnaA01g23630D	starch	cytosol	AT3G23640	HGL1__heteroglycan glucosidase 1	AGL1	-0.705675	-0.352433	-0.505008	-0.302174	-0.522967	-0.185467	0.0144934	0.329303	0.84182	0.380244	0.104594	1
BnaCnng29880D	starch	cytosol	AT3G23640	HGL1__heteroglycan glucosidase 1	AGL1	-0.104426	-0.0425368	0.00300482	-0.0466598	-0.154971	0.160496	0.737835	0.929217	1	0.919489	0.647031	0.828675
BnaC02g18350D	starch	cell wall	AT3G45940	Glycosyl hydrolases family 31 protein	AGL3	-2.44689	-2.2211	0.212678	-2.09035	-2.25017	-0.161808	3.62162e-06	8.02558e-05	0.92228	0.000107341	5.35659e-05	0.968181
BnaA07g24570D	starch	cell wall	AT3G45940	Glycosyl hydrolases family 31 protein	AGL3	-1.53705	-2.10029	0.839875	-1.67328	-2.93375	-0.746821	0.0460468	0.0144395	0.578992	0.0400383	0.000615156	0.682681
BnaC06g25790D	starch	cell wall	AT3G45940	Glycosyl hydrolases family 31 protein	AGL3	-1.8239	-1.76989	0.870467	-2.44346	-2.80776	0.594772	3.8594e-05	0.000414635	0.101424	4.26937e-07	2.0209e-07	0.400389
BnaA02g13970D	starch	cell wall	AT3G45940	Glycosyl hydrolases family 31 protein	AGL3	-3.06118	-2.24829	0.0250548	-2.65638	-1.82476	0.17179	3.81971e-09	3.6998e-05	1	4.52977e-07	0.000858573	0.959116
BnaA07g27230D	starch	cell wall	AT3G45940	Glycosyl hydrolases family 31 protein	AGL3	-3.37709	-2.39726	0.555247	-2.85917	-3.48214	-0.404876	1.32241e-09	3.29129e-05	0.638364	7.42716e-07	4.23729e-09	0.789003
BnaC06g30160D	starch	cell wall	AT3G45940	Glycosyl hydrolases family 31 protein	AGL3	-3.08862	-1.58122	-0.358402	-2.51533	-2.09698	0.200974	2.91208e-18	1.56963e-05	0.638434	8.84329e-13	4.44567e-09	0.86403
BnaC03g04980D	starch	cytosol	AT5G11720	Glycosyl hydrolases family 31 protein	AGL4	-0.285943	-0.413967	0.837099	-0.264515	-0.179662	0.496703	0.71959	0.645455	0.485256	0.773775	0.86356	0.768708
BnaA03g03490D	starch	cytosol	AT5G11720	Glycosyl hydrolases family 31 protein	AGL4	-1.28335	-1.41452	0.365015	-1.73959	-1.59002	0.495798	0.000127257	6.91582e-05	0.592136	1.04662e-06	1.73162e-05	0.444279
	starch	cytosol	AT1G68560	ATXYL1_AXY3_TRG1_XYL1__alpha-xylosidase 1	AGL5
BnaCnng20610D	starch	plastid	AT5G04360	ATLDA_ATPU1_LDA_PU1__limit dextrinase	PU1	0.809145	0.588833	0.901803	0.085683	0.2314	-0.206004	0.291639	0.523527	0.533267	0.958422	0.829478	0.975184
BnaA10g25820D	starch	plastid	AT5G04360	ATLDA_ATPU1_LDA_PU1__limit dextrinase	PU1	-1.73236	0.0771796	0.442878	-1.0766	-0.186969	0.110506	9.45624e-06	0.92012	0.601914	0.0101859	0.752415	0.979392
BnaA10g04930D	starch	cytosol	AT1G24320	Six-hairpin glycosidases superfamily protein	GCS2	0.198429	0.135041	-0.0680636	-0.801099	-1.10411	0.025075	0.873899	0.960426	1	0.484411	0.329197	1
BnaA07g08990D	starch	cytosol	AT1G24320	Six-hairpin glycosidases superfamily protein	GCS2	-1.64687	-0.808673	-0.0318542	-1.02829	-0.395864	3.98968	0.00129772	0.199553	1	0.0642644	0.560381	0.261007
BnaA07g24990D	cellulose	ER	AT1G67490	GCS1_KNF__glucosidase 1	GCS1	-0.466556	0.0549028	0.240343	-0.112541	0.0472575	-0.00294025	0.0373495	0.88868	0.638434	0.712205	0.905593	1
BnaC06g26720D	cellulose	ER	AT1G67490	GCS1_KNF__glucosidase 1	GCS1	-0.857751	-0.330851	-0.102052	-0.466759	-0.31066	-0.0304729	0.000233231	0.260462	0.922244	0.0713102	0.282121	1
BnaA06g22950D	cellulose	ER	AT5G63840	PSL5_RSW3__Glycosyl hydrolases family 31 protein	AGL2/GLUIIa	-0.717162	-0.0555136	-0.346599	-0.182217	0.325295	-0.137815	0.0225798	0.925971	0.609854	0.684754	0.434925	0.935042
BnaA09g52360D	cellulose	ER	AT5G63840	PSL5_RSW3__Glycosyl hydrolases family 31 protein	AGL2/GLUIIa	-3.53238	-2.15477	-0.215425	-3.16491	-2.2165	0.553985	4.49784e-11	8.52283e-05	0.917377	3.2124e-09	4.86133e-05	0.65288
BnaA06g22960D	cellulose	ER	AT5G63840	PSL5_RSW3__Glycosyl hydrolases family 31 protein	AGL2/GLUIIa	-0.840217	-0.364977	-0.204056	-0.617841	-0.390763	-0.272793	8.59876e-05	0.162456	0.681086	0.00702947	0.122299	0.595677
BnaA09g52350D	cellulose	ER	AT5G63840	PSL5_RSW3__Glycosyl hydrolases family 31 protein	AGL2/GLUIIa	-3.05625	-1.66045	-0.314343	-2.56197	-1.82253	0.102917	3.68693e-08	0.00296281	0.843919	2.47294e-06	0.00114081	1
BnaC09g06110D	cellulose	ER	AT5G63840	PSL5_RSW3__Glycosyl hydrolases family 31 protein	AGL2/GLUIIa	-3.1119	-1.85373	-0.212596	-2.6133	-2.49738	-0.0847356	7.8346e-20	8.03785e-08	0.833202	1.33455e-14	3.14024e-13	0.988291
BnaC03g50520D	cellulose	ER	AT5G63840	PSL5_RSW3__Glycosyl hydrolases family 31 protein	AGL2/GLUIIa	-0.975096	-0.453051	-0.672623	-0.477463	-0.20102	-0.219612	0.0023639	0.244806	0.191695	0.194824	0.655177	0.828656
BnaC09g06100D	cellulose	ER	AT5G63840	PSL5_RSW3__Glycosyl hydrolases family 31 protein	AGL2/GLUIIa	-2.48348	-2.31412	-0.299663	-2.21652	-1.65933	-0.0327101	3.13907e-09	6.37185e-08	0.810499	1.73163e-07	9.18469e-05	1
BnaC03g50510D	cellulose	ER	AT5G63840	PSL5_RSW3__Glycosyl hydrolases family 31 protein	AGL2/GLUIIa	-1.04392	-0.769333	-0.186023	-0.757105	-0.45708	-0.208463	1.46591e-07	0.000355841	0.702081	0.00026594	0.0445421	0.696149
BnaA03g10900D	cellulose	ER	AT5G56360	PSL4__calmodulin-binding protein	PSL4/GLUIIb	-0.643572	-0.0176047	0.161479	-0.176147	0.00120903	-1.00886	0.104414	0.993009	0.914822	0.744757	1	0.0845019
BnaA10g10600D	cellulose	ER	AT5G56360	PSL4__calmodulin-binding protein	PSL4/GLUIIb	-0.483662	-0.0568386	-0.20177	-0.241313	-0.0440486	-0.374481	0.0167127	0.870957	0.681704	0.309266	0.905083	0.35915
BnaC03g13570D	cellulose	ER	AT5G56360	PSL4__calmodulin-binding protein	PSL4/GLUIIb	-0.3622	-0.334753	-0.574534	-0.0659759	-0.0488762	-0.321246	0.285318	0.402828	0.254415	0.904532	0.938074	0.672484
BnaCnng14010D	cellulose	ER	AT5G56360	PSL4__calmodulin-binding protein	PSL4/GLUIIb	-0.571926	-0.113077	-0.437631	-0.0477186	-0.0774446	-0.428496	0.00308855	0.696769	0.157301	0.886942	0.796802	0.206908
BnaC03g68760D	sucrose	cytosol	AT1G51420	ATSPP1_SPP1__sucrose-phosphatase 1	SPP1	-0.827831	-0.0822067	0.847553	-0.990716	-0.0160551	0.265246	0.0736082	0.922929	0.255521	0.0370493	1	0.871346
BnaC06g08810D	sucrose	cytosol	AT1G51420	ATSPP1_SPP1__sucrose-phosphatase 1	SPP1	-0.472216	-0.135347	-0.756217	-0.111201	0.142365	-1.18847	0.157132	0.783364	0.723598	0.818334	0.759221	0.620514
BnaA05g15220D	sucrose	cytosol	AT1G51420	ATSPP1_SPP1__sucrose-phosphatase 1	SPP1	-0.307698	0.558181	0.0035934	0.174971	0.946864	-2.33831	0.325368	0.0816735	1	0.649821	0.00137298	0.69813
	sucrose	cytosol	AT3G52340	ATSPP2_SPP2__sucrose-6F-phosphate phosphohydrolase 2	SPP2
BnaC03g19650D	sucrose	cytosol	AT2G35840	Sucrose-6F-phosphate phosphohydrolase family protein	SPP3	0.0909176	-0.136787	-0.149023	-0.0931568	0.0372415	0.236059	0.803151	0.742143	0.85565	0.827465	0.950649	0.727885
BnaA03g16340D	sucrose	cytosol	AT2G35840	Sucrose-6F-phosphate phosphohydrolase family protein	SPP3	-0.300937	-0.228045	-0.0436385	-0.219651	-0.399171	0.448197	0.248656	0.468189	1	0.459851	0.145597	0.279287
BnaA03g16350D	sucrose	cytosol	AT2G35840	Sucrose-6F-phosphate phosphohydrolase family protein	SPP3	-2.09068	0.178525	3.63879	-1.90662	-0.90314	-1.43641	0.0147646	0.906239	0.307933	0.0132906	0.281611	0.839307
BnaC03g19660D	sucrose	cytosol	AT2G35840	Sucrose-6F-phosphate phosphohydrolase family protein	SPP3	-2.26845	-5.09711	0.0220486	-0.0853532	-0.570585	-1.44928	0.0798246	0.0033328	1	0.985605	0.706621	0.839574
BnaA04g20870D	sucrose	cytosol	AT2G35840	Sucrose-6F-phosphate phosphohydrolase family protein	SPP3	-0.757803	1.35624	1.23568	1.2141	1.61875	-1.10245	0.541612	0.245791	0.625338	0.269822	0.125779	0.770597
BnaC04g44820D	sucrose	cytosol	AT2G35840	Sucrose-6F-phosphate phosphohydrolase family protein	SPP3	-0.524783	-1.37206	-0.209413	-0.23637	-1.31347	0.0398957	0.0523018	3.07005e-07	0.715225	0.46684	8.39729e-07	1
BnaC04g44830D	sucrose	cytosol	AT2G35840	Sucrose-6F-phosphate phosphohydrolase family protein	SPP3	1.22071	-1.00687	0.637863	0.223987	-0.267442	-0.259626	0.130378	0.26634	0.422578	0.825074	0.766977	0.846857
BnaA09g34190D	sucrose	cytosol	AT3G54270	sucrose-6F-phosphate phosphohydrolase family protein	SPP4	-1.03355	-1.09078	0.31978	-0.509449	-0.680128	0.219507	0.000678556	0.000827202	0.656185	0.141473	0.0464742	0.821485
BnaCnng46880D	sucrose	cytosol	AT3G54270	sucrose-6F-phosphate phosphohydrolase family protein	SPP4	-0.301446	0.231314	0.593172	0.0955276	0.314255	0.832826	0.39562	0.597765	0.648995	0.84827	0.426823	0.388892
BnaA04g04190D	sucrose	cytosol	AT3G54270	sucrose-6F-phosphate phosphohydrolase family protein	SPP4	-0.229676	0.501265	-0.00894429	0.134781	0.759162	0.0193592	0.64931	0.338764	1	0.835831	0.107976	1
BnaC08g25100D	sucrose	cytosol	AT3G54270	sucrose-6F-phosphate phosphohydrolase family protein	SPP4	-1.33074	-1.22512	-0.0173224	-0.609841	-0.7639	-0.770254	0.00859639	0.0286789	1	0.314884	0.201162	0.519965
BnaA02g04800D	sucrose	cytosol	AT5G20280	ATSPS1F_SPS1F_SPSA1__sucrose phosphate synthase 1F	SPS1F	0.507332	-0.0555955	0.496251	0.00699953	-0.129966	1.06359	0.494708	0.973539	0.747949	1	0.91279	0.376666
BnaC09g37470D	sucrose	cytosol	AT5G20280	ATSPS1F_SPS1F_SPSA1__sucrose phosphate synthase 1F	SPS1F	-0.507326	-0.566915	0.0481733	-0.273024	-0.363898	0.320686	0.0275575	0.0234839	0.989314	0.30865	0.168814	0.47979
BnaA10g15120D	sucrose	cytosol	AT5G20280	ATSPS1F_SPS1F_SPSA1__sucrose phosphate synthase 1F	SPS1F	-0.517464	-0.257106	0.086165	0.0936309	-0.0605545	0.30458	0.0220654	0.371275	0.924744	0.78028	0.875596	0.503735
BnaC07g29460D	sucrose	cytosol	AT5G11110	ATSPS2F_KNS2_SPS1_SPS2F_SPSA2__sucrose phosphate synthase 2F	SPS2F	-0.366018	-1.54646	-0.566608	0.344349	-0.468162	0.175324	0.459303	0.000708495	0.48848	0.522598	0.376597	0.92784
BnaA03g03230D	sucrose	cytosol	AT5G11110	ATSPS2F_KNS2_SPS1_SPS2F_SPSA2__sucrose phosphate synthase 2F	SPS2F	-1.1133	-1.41692	0.309932	0.516412	-1.16003	0.785551	0.0399662	0.00870713	0.82596	0.395094	0.0300778	0.416805
BnaC03g04660D	sucrose	cytosol	AT5G11110	ATSPS2F_KNS2_SPS1_SPS2F_SPSA2__sucrose phosphate synthase 2F	SPS2F	0.588826	-0.812928	-0.0311074	1.23652	-1.40027	0.410511	0.405712	0.282585	1	0.0721691	0.0425436	0.838413
BnaC05g27770D	sucrose	cytosol	AT5G11110	ATSPS2F_KNS2_SPS1_SPS2F_SPSA2__sucrose phosphate synthase 2F	SPS2F	0.138341	-0.13361	-2.57988	-0.0277187	-0.030815	0.15761	1	1	0.343628	1	1	1
BnaC05g02930D	sucrose	cytosol	AT1G04920	ATSPS3F_SPS3F__sucrose phosphate synthase 3F	SPS3F	-0.296201	1.15183	0.762596	-3.11141	-0.226175	0.161115	0.726201	0.13806	0.101799	0.000582153	0.854664	0.893909
BnaCnng65550D	sucrose	cytosol	AT4G10120	ATSPS4F__Sucrose-phosphate synthase family protein	SPS4F	1.9655	0.895653	-0.0203348	2.12671	1.18303	0.203368	1.1076e-06	0.0485065	1	3.53688e-07	0.00821745	0.859357
BnaC02g29300D	sucrose	cytosol	AT4G10120	ATSPS4F__Sucrose-phosphate synthase family protein	SPS4F	1.8912	1.07841	-0.454229	2.44939	0.800313	0.377013	3.59754e-08	0.00358281	0.437066	1.44487e-11	0.0427388	0.603754
BnaA02g23460D	sucrose	cytosol	AT4G10120	ATSPS4F__Sucrose-phosphate synthase family protein	SPS4F	2.15175	0.337465	-0.0903488	1.98415	-0.325935	0.452665	2.01548e-10	0.457138	0.97082	6.25217e-09	0.462455	0.51631

## Sheet: others
ID	pathway	localization	AGI	annotation	Name	logFC.Root_H4h_AV	logFC.Root_H24h_AV	logFC.Leaf_H24h_AV	logFC.Root_H4h_ZS	logFC.Root_H24h_ZS	logFC.Leaf_H24h_ZS	FDR.Root_H4h_AV	FDR.Root_H24h_AV	FDR.Leaf_H24h_AV	FDR.Root_H4h_ZS	FDR.Root_H24h_ZS	FDR.Leaf_H24h_ZS
BnaC06g40550D	G3P shuttle	cytosol	AT1G80460	GLI1_NHO1__Actin-like ATPase superfamily protein	GLI1	-0.014578	-0.300202	0.994283	-0.702127	0.0196889	-0.35308	0.988729	0.536417	0.0523189	0.0649844	0.994288	0.709394
BnaA02g19720D	G3P shuttle	cytosol	AT1G80460	GLI1_NHO1__Actin-like ATPase superfamily protein	GLI1	-2.59305	-1.01992	0.384705	-2.79144	-0.972489	0.181939	1.14477e-08	0.0467865	0.693728	5.2359e-09	0.0603852	0.926584
BnaA07g35620D	G3P shuttle	cytosol	AT1G80460	GLI1_NHO1__Actin-like ATPase superfamily protein	GLI1	-0.247899	0.560735	0.325831	-0.79804	1.59807	0.626838	0.785418	0.559202	0.899071	0.334756	0.0392003	0.732063
BnaC04g35780D	G3P shuttle	cytosol	AT1G80460	GLI1_NHO1__Actin-like ATPase superfamily protein	GLI1	0.488871	0.551696	0.269295	0.34028	0.333683	0.459884	0.0795987	0.0781114	0.68156	0.321883	0.35203	0.47325
BnaA08g03870D	G3P shuttle	cytosol	AT1G80460	GLI1_NHO1__Actin-like ATPase superfamily protein	GLI1	0.144631	0.293873	0.646463	0.121949	0.286439	0.105353	0.581172	0.275785	0.025944	0.687113	0.279416	0.905616
BnaC06g19180D	G3P shuttle	cytosol	AT1G80460	GLI1_NHO1__Actin-like ATPase superfamily protein	GLI1	0.0706564	-0.701888	0.320202	-0.337072	-0.661076	0.258975	0.849443	0.0171892	0.56322	0.285032	0.0230542	0.709729
BnaA07g19880D	G3P shuttle	cytosol	AT1G80460	GLI1_NHO1__Actin-like ATPase superfamily protein	GLI1	0.319068	-0.540388	0.0299115	-0.279689	-0.322502	-0.214895	0.432323	0.211857	1	0.550519	0.489883	0.866988
BnaA04g23450D	G3P shuttle	cytosol	AT2G40690	GLY1_SFD1__NAD-dependent glycerol-3-phosphate dehydrogenase family protein	GLY1	-0.610478	0.254877	-1.37611	-0.282295	0.276019	-0.206777	0.267038	0.734538	0.0172938	0.642258	0.66696	0.901913
BnaC04g47330D	G3P shuttle	cytosol	AT2G40690	GLY1_SFD1__NAD-dependent glycerol-3-phosphate dehydrogenase family protein	GLY1	0.327165	0.335159	-0.217589	-0.537481	-1.17224	-0.981585	0.483127	0.567291	0.853789	0.281809	0.0122154	0.095145
BnaC04g01960D	G3P shuttle	cytosol	AT2G41540	GPDHC1__6-phosphogluconate dehydrogenase family protein	GPDHC1	1.81154	0.240647	0.145813	2.16495	0.695842	-2.07068	0.000331212	0.762589	1	2.55041e-05	0.258096	0.226139
BnaC03g23410D	G3P shuttle	cytosol	AT2G41540	GPDHC1__6-phosphogluconate dehydrogenase family protein	GPDHC1	-0.665847	-0.484981	0.034384	-0.417486	-0.479257	-0.147521	0.0770709	0.277748	1	0.324927	0.266059	0.93639
BnaA05g02270D	G3P shuttle	cytosol	AT2G41540	GPDHC1__6-phosphogluconate dehydrogenase family protein	GPDHC1	-0.0766853	-0.457068	-0.365515	0.0168563	-0.270081	2.10612	0.930503	0.562149	0.980901	1	0.741774	0.360514
BnaA03g19520D	G3P shuttle	cytosol	AT2G41540	GPDHC1__6-phosphogluconate dehydrogenase family protein	GPDHC1	-1.43136	-0.79035	0.607425	-0.782935	-0.780739	-0.875693	0.00590179	0.203454	0.552818	0.188581	0.215312	0.386329
BnaC05g44270D	G3P shuttle	cytosol	AT3G07690	6-phosphogluconate dehydrogenase family protein	GPDHC2	0.230647	-0.397643	0.318844	0.214486	-0.323418	-0.260923	0.524875	0.313215	0.753748	0.590974	0.410317	0.822414
BnaA05g29950D	G3P shuttle	cytosol	AT3G07690	6-phosphogluconate dehydrogenase family protein	GPDHC2	0.159798	-0.633514	0.00591074	0.235031	-0.224183	-0.575902	0.630541	0.0409776	1	0.521526	0.578032	0.464628
BnaC01g38650D	G3P shuttle	mito	AT3G10370	SDP6__FAD-dependent oxidoreductase family protein	GPDHM	-1.3807	-1.09547	0.499855	0.130828	0.985855	-2.12466	0.0226674	0.114144	0.723598	0.988507	0.650208	0.726594
BnaC05g42730D	G3P shuttle	mito	AT3G10370	SDP6__FAD-dependent oxidoreductase family protein	GPDHM	-0.778321	-0.330993	0.11649	-1.71753	-4.94699	-5.21214	0.286033	0.741557	1	0.422022	0.00326017	0.0702579
BnaA05g28450D	G3P shuttle	mito	AT3G10370	SDP6__FAD-dependent oxidoreductase family protein	GPDHM	-0.0635771	-0.540474	0.120716	-0.334958	-0.295232	0.358974	0.846547	0.0426136	0.880329	0.207282	0.294326	0.432717
BnaA01g31820D	G3P shuttle	mito	AT3G10370	SDP6__FAD-dependent oxidoreductase family protein	GPDHM	-1.49691	-1.18074	-0.0746563	-1.73732	-1.15766	-0.0749416	0.000144364	0.00653047	0.999942	1.4903e-05	0.0064769	1
BnaC04g32730D	G3P shuttle	plastid	AT5G40610	NAD-dependent glycerol-3-phosphate dehydrogenase family protein	GPDHP	-1.10398	-0.782019	0.389632	-0.994862	-0.751639	-0.104645	0.0500535	0.240506	0.764061	0.115466	0.274113	1
BnaC06g42250D	G3P shuttle	plastid	AT5G40610	NAD-dependent glycerol-3-phosphate dehydrogenase family protein	GPDHP	-0.637635	-1.85578	-0.374258	-0.355738	-0.767634	-0.132364	0.12175	6.06657e-06	0.529077	0.305226	0.0156446	0.911645
BnaA07g15060D	G3P shuttle	plastid	AT5G40610	NAD-dependent glycerol-3-phosphate dehydrogenase family protein	GPDHP	-0.438242	-0.707163	-0.390357	-1.48648	-2.7064	-1.08634	0.542022	0.365745	0.81323	0.104481	0.000933753	0.383079
BnaC02g24620D	other	cytosol	AT1G65930	cICDH__cytosolic NADP+-dependent isocitrate dehydrogenase	cICDH	0.375602	0.0633178	-0.225587	0.597597	0.399228	0.280492	0.137814	0.880149	0.710784	0.0165319	0.145283	0.657201
BnaC06g27300D	other	cytosol	AT1G65930	cICDH__cytosolic NADP+-dependent isocitrate dehydrogenase	cICDH	-0.633445	-0.304507	-0.228286	-0.34986	-0.120491	-0.068936	0.00291907	0.248528	0.630398	0.144903	0.693419	0.964656
BnaA02g12320D	other	cytosol	AT1G65930	cICDH__cytosolic NADP+-dependent isocitrate dehydrogenase	cICDH	-0.00128201	-0.358557	-0.530689	-0.228035	0.232082	0.780289	1	0.76459	0.799961	0.852446	0.853681	0.683704
BnaA07g25510D	other	cytosol	AT1G65930	cICDH__cytosolic NADP+-dependent isocitrate dehydrogenase	cICDH	-0.859356	-0.719657	0.302012	-0.951082	-0.560868	0.0149746	0.0125992	0.0641939	0.701458	0.0072295	0.156924	1
BnaAnng25840D	other	cytosol	AT1G65930	cICDH__cytosolic NADP+-dependent isocitrate dehydrogenase	cICDH	0.479952	1.13598	-0.218156	0.82496	1.94326	-1.42633	0.422459	0.0607463	0.934971	0.158602	0.00118754	0.338951
BnaCnng36970D	other	cytosol	AT1G65930	cICDH__cytosolic NADP+-dependent isocitrate dehydrogenase	cICDH	-0.373238	-0.233835	0.350363	-0.292894	-0.30399	0.00815277	0.102352	0.410102	0.376926	0.244257	0.239897	1
BnaA03g04970D	other	plastid	AT5G14590	Isocitrate/isopropylmalate dehydrogenase family protein	pICDH	-0.323244	-0.385948	-0.957316	0.415254	-0.316085	-0.739966	0.649058	0.638748	0.338893	0.579559	0.702277	0.564798
BnaC03g06570D	other	plastid	AT5G14590	Isocitrate/isopropylmalate dehydrogenase family protein	pICDH	0.492344	0.136181	0.317358	0.562346	0.211327	0.104728	0.452304	0.894132	0.857431	0.417705	0.810947	1
BnaA07g17800D	other	perox	AT1G54340	ICDH__isocitrate dehydrogenase	pxICDH	0.194201	0.177853	-0.218442	0.154594	0.248685	-0.0248146	0.453772	0.572859	0.662942	0.599346	0.376463	1
BnaA04g01840D	glyoxylate	perox	AT3G58740	CSY1__citrate synthase 1	CSY1	-0.569023	-0.0369192	-0.334949	-1.15902	0.229788	-0.0848649	0.496677	0.990108	0.91763	0.173771	0.849975	1
BnaA04g01830D	glyoxylate	perox	AT3G58740	CSY1__citrate synthase 1	CSY1	0.662436	0.789314	-0.0894871	3.29166	0.524374	1.18127	0.511813	0.518781	1	0.00208795	0.757998	0.550677
BnaC08g29460D	glyoxylate	perox	AT3G58750	CSY2__citrate synthase 2	CSY2	-0.24019	-1.20839	-0.303288	-0.302355	-1.00533	-2.14184	0.679314	0.0191164	0.916264	0.627066	0.0539079	0.445717
BnaC08g29490D	glyoxylate	perox	AT3G58750	CSY2__citrate synthase 2	CSY2	1.4213	0.222011	0.300807	0.113411	-0.279472	-0.0114961	3.91195e-05	0.665978	0.735929	0.838285	0.548739	1
BnaA09g55310D	glyoxylate	perox	AT3G58750	CSY2__citrate synthase 2	CSY2	1.00933	-0.260979	-0.18072	0.085586	-0.315863	0.0315479	0.0383006	0.711647	0.935849	0.92485	0.623934	1
BnaA07g18040D	glyoxylate	perox	AT3G58750	CSY2__citrate synthase 2	CSY2	0.305557	0.316708	0.308549	0.0886944	0.260904	0.571481	0.227479	0.271224	0.517369	0.800267	0.36553	0.123715
BnaC06g16900D	glyoxylate	perox	AT3G58750	CSY2__citrate synthase 2	CSY2	-0.288178	-0.232541	0.198863	-0.33369	-0.0965166	0.171521	0.161492	0.343108	0.645994	0.117	0.73106	0.743017
BnaC04g52580D	glyoxylate	perox	AT2G42790	CSY3__citrate synthase 3	CSY3	0.240763	0.23401	1.13774	-0.186193	-0.330793	0.70782	0.626153	0.695273	0.0377871	0.746144	0.526576	0.337051
BnaA07g08220D	glyoxylate	perox	AT2G42790	CSY3__citrate synthase 3	CSY3	0.935435	0.442518	0.125452	2.89941	-1.25218	-2.36459	0.412146	0.774188	1	0.157146	0.377782	0.238216
BnaA05g03050D	glyoxylate	perox	AT2G42790	CSY3__citrate synthase 3	CSY3	0.487622	-0.0396182	0.476298	-0.143137	-1.68869	0.263194	0.604345	0.990108	0.827026	0.943487	0.099357	0.958346
BnaCnng07060D	glyoxylate	perox	AT3G21720	ICL__isocitrate lyase	ICL	6.4985	2.99886	-0.0413902	1.85395	-0.44638	0.0876014	0.040502	0.394768	1	0.750497	0.878031	1
BnaCnng07050D	glyoxylate	perox	AT3G21720	ICL__isocitrate lyase	ICL	3.53383	2.09057	-0.0333738	2.05042	-0.55908	0.12383	0.00212028	0.0990524	1	0.0883665	0.703501	1
BnaA05g19530D	glyoxylate	perox	AT3G21720	ICL__isocitrate lyase	ICL	3.58822	3.3508	-0.0345152	1.80096	1.20069	-1.95065	0.00238835	0.00733503	1	0.153195	0.412975	0.755314
BnaAnng00830D	glyoxylate	perox	AT5G03860	MLS__malate synthase	MLS	1.24486	0.497649	1.63326	-0.349015	-0.520454	0.495259	0.245528	0.775905	0.259506	0.816127	0.782603	0.822517
BnaAnng41760D	glyoxylate	perox	AT5G03860	MLS__malate synthase	MLS	-0.617042	0.0758604	0.861917	-0.658136	-0.40294	0.682906	0.196004	0.929217	0.247445	0.18166	0.467397	0.462399
BnaC06g14420D	glyoxylate	perox	AT5G03860	MLS__malate synthase	MLS	-0.48088	0.333939	1.59595	-0.981157	-0.957774	0.444746	0.596461	0.768214	0.285496	0.307486	0.346908	0.913976
BnaC09g27280D	glyoxylate	perox	AT2G22780	PMDH1__peroxisomal NAD-malate dehydrogenase 1	PMDH1	-0.372315	0.210237	0.115647	-0.22983	0.418015	-0.0735766	0.241179	0.610176	0.933578	0.532848	0.220499	0.994414
BnaC03g27850D	glyoxylate	perox	AT2G22780	PMDH1__peroxisomal NAD-malate dehydrogenase 1	PMDH1	-0.264186	-0.212259	0.360534	-0.937255	0.200424	0.307454	0.623694	0.760389	0.79068	0.066174	0.779884	0.883283
BnaA04g13230D	glyoxylate	perox	AT2G22780	PMDH1__peroxisomal NAD-malate dehydrogenase 1	PMDH1	0.569317	-0.416567	0.056694	-0.453203	-0.804888	-0.650248	0.0690568	0.263832	1	0.204707	0.0160592	0.302029
BnaC03g65500D	glyoxylate	perox	AT2G22780	PMDH1__peroxisomal NAD-malate dehydrogenase 1	PMDH1	-0.05992	-0.58478	0.554082	-0.652593	-0.198973	1.35058	0.924659	0.266786	0.638434	0.155432	0.744257	0.0739381
BnaC07g14970D	glyoxylate	perox	AT2G22780	PMDH1__peroxisomal NAD-malate dehydrogenase 1	PMDH1	0.0130277	0.157026	0.230112	-0.0134222	-0.5007	0.235975	0.993453	0.802935	0.85288	1	0.291729	0.859055
BnaC04g35330D	glyoxylate	perox	AT2G22780	PMDH1__peroxisomal NAD-malate dehydrogenase 1	PMDH1	-0.494302	-0.65943	-0.00968396	-0.50615	-0.509719	0.187265	0.0472472	0.012415	1	0.0515478	0.0571853	0.783292
BnaA02g00100D	glyoxylate	perox	AT5G09660	PMDH2__peroxisomal NAD-malate dehydrogenase 2	PMDH2	1.37855	0.455106	0.12345	-0.511985	0.555651	-0.314915	0.150703	0.665864	0.971182	0.709303	0.618884	0.819688
BnaC09g46980D	glyoxylate	perox	AT5G09660	PMDH2__peroxisomal NAD-malate dehydrogenase 2	PMDH2	-1.68628	-1.34962	-0.137249	-0.70762	-0.902204	0.317895	0.13374	0.355137	0.900597	0.676422	0.300166	0.660253
BnaA10g22420D	glyoxylate	perox	AT5G09660	PMDH2__peroxisomal NAD-malate dehydrogenase 2	PMDH2	-1.32398	-0.156203	0.609162	-0.0678231	0.205807	0.852338	0.00589066	0.843968	0.444384	0.947301	0.769575	0.261191
BnaC02g00740D	glyoxylate	perox	AT5G09660	PMDH2__peroxisomal NAD-malate dehydrogenase 2	PMDH2	0.222047	-1.43449	0.097393	0.11492	-1.29184	0.69084	0.860328	0.203349	1	0.971525	0.399698	0.772692
BnaC03g64520D	other	cytosol	AT4G20930	3-hydroxyisobutyrate dehydrogenase	At4g20930	1.31725	-0.134486	0.844979	0.0466208	-0.790349	0.4114	0.000622139	0.836927	0.161129	0.964833	0.082262	0.681644
BnaA08g09990D	other	cytosol	AT4G20930	3-hydroxyisobutyrate dehydrogenase	At4g20930	0.308272	0.109801	0.728769	-0.274413	-0.515133	0.173604	0.476674	0.864537	0.33637	0.569931	0.246567	0.93554
BnaC05g14020D	other	cytosol	AT1G18270	ketose-bisphosphate aldolase class-II family protein	At1g18270	0.456785	-0.716495	0.957679	-0.672135	-1.04418	0.0737706	0.322676	0.142155	0.117761	0.144136	0.0195498	1
BnaA06g12420D	other	cytosol	AT1G18270	ketose-bisphosphate aldolase class-II family protein	At1g18270	0.846014	-0.467169	0.139779	0.175137	-0.682462	-0.474055	0.0834491	0.448094	0.961556	0.804339	0.219236	0.692498
BnaC05g46610D	other	cytosol	AT3G05170	Phosphoglycerate mutase family protein	At3g05170	0.483547	0.379145	-0.696761	0.333112	0.112067	2.33711	0.2787	0.483829	0.698602	0.516195	0.870128	0.0288973
BnaA05g31980D	other	cytosol	AT3G05170	Phosphoglycerate mutase family protein	At3g05170	0.440282	-0.392297	2.28443	0.557697	0.464725	3.12682	0.312033	0.449776	0.638434	0.286028	0.381993	0.113445
BnaAnng02490D	other	cytosol	AT3G05170	Phosphoglycerate mutase family protein	At3g05170	-0.824759	-0.677841	-0.448673	-1.87806	-2.45857	-1.26462	0.220281	0.40929	0.804375	0.0181465	0.00229248	0.461544
BnaA06g05220D	other	cytosol	AT1G08940	Phosphoglycerate mutase family protein	At1g08940	0.422272	1.8259	0.699301	0.498608	0.770973	-0.610247	0.543301	0.00678566	0.711937	0.496065	0.287286	0.75313
BnaC05g06510D	other	cytosol	AT1G08940	Phosphoglycerate mutase family protein	At1g08940	1.78777	1.75097	-0.105065	0.901543	1.39664	0.0342187	6.87742e-05	0.000466939	1	0.067289	0.00477656	1
	other	plastid	AT5G54950	Aconitase family protein	At5g54950
BnaA08g29810D	gluconeogenesis	cytosol	AT1G43670	AtcFBP_FBP_FINS1__Inositol monophosphatase family protein	FBPaseC1	1.98725	-0.321057	-0.0504578	1.05878	-1.09689	0.202336	8.33899e-09	0.499256	1	0.00374051	0.00339446	0.861243
BnaA05g10520D	gluconeogenesis	cytosol	AT1G43670	AtcFBP_FBP_FINS1__Inositol monophosphatase family protein	FBPaseC1	-0.902436	-0.22155	0.0523482	-0.672991	0.38661	-0.372202	0.0203954	0.704679	1	0.10665	0.421346	0.809196
BnaCnng53590D	gluconeogenesis	cytosol	AT1G43670	AtcFBP_FBP_FINS1__Inositol monophosphatase family protein	FBPaseC1	-0.309454	0.148911	0.640783	-0.35795	0.17989	0.208822	0.224521	0.660969	0.0476724	0.179579	0.566914	0.734029
BnaC08g46760D	gluconeogenesis	cytosol	AT1G43670	AtcFBP_FBP_FINS1__Inositol monophosphatase family protein	FBPaseC1	1.33973	-0.7675	-0.0219592	0.983421	-1.31536	0.18886	0.00022071	0.0677349	1	0.0108865	0.000696782	0.884659
BnaA01g18450D	gluconeogenesis	cytosol	AT4G15530	PPDK__pyruvate orthophosphate dikinase	PPDK	4.36822	1.48091	0.301492	2.42566	0.273479	1.23354	9.48502e-09	0.0686	0.911475	0.00119415	0.807136	0.346408
BnaC07g33060D	gluconeogenesis	cytosol	AT4G15530	PPDK__pyruvate orthophosphate dikinase	PPDK	3.17797	1.91611	0.0980428	1.37095	0.405535	0.769298	0.000545089	0.0674695	1	0.193923	0.769154	0.723634
BnaA01g18440D	gluconeogenesis	cytosol	AT4G15530	PPDK__pyruvate orthophosphate dikinase	PPDK	2.33718	2.34523	0.124738	-1.52799	1.00541	0.989853	0.0771361	0.11753	0.978434	0.266907	0.638894	0.26254
BnaCnng27780D	gluconeogenesis	cytosol	AT4G15530	PPDK__pyruvate orthophosphate dikinase	PPDK	3.97727	1.62087	0.209571	2.40331	0.0231885	0.466719	4.36202e-06	0.0816735	0.972668	0.00478381	1	0.856686
BnaUnng05120D	gluconeogenesis	cytosol	AT4G15530	PPDK__pyruvate orthophosphate dikinase	PPDK	2.39568	-1.59401	0.302618	-0.017092	1.89692	-0.541283	0.157157	0.401658	0.907504	1	0.379613	0.825372
BnaA03g41960D	gluconeogenesis	cytosol	AT4G15530	PPDK__pyruvate orthophosphate dikinase	PPDK	2.82952	1.56549	0.621021	0.103156	-0.209751	1.19794	0.000425828	0.0816748	0.71918	0.956234	0.869362	0.397762
BnaC06g09980D	gluconeogenesis	cytosol	AT1G53310	ATPEPC1_ATPPC1_PEPC1_PPC1__phosphoenolpyruvate carboxylase 1	PPC1	-2.2738	-0.739125	-0.0655932	-1.51442	-0.534038	0.946378	1.08186e-06	0.188432	1	0.00165151	0.358965	0.252406
BnaC03g69540D	gluconeogenesis	cytosol	AT1G53310	ATPEPC1_ATPPC1_PEPC1_PPC1__phosphoenolpyruvate carboxylase 1	PPC1	-1.44032	0.00130514	0.0334896	-0.83505	-0.179412	0.257439	2.67441e-10	1	1	0.000481966	0.571397	0.656384
BnaA08g01200D	gluconeogenesis	cytosol	AT1G53310	ATPEPC1_ATPPC1_PEPC1_PPC1__phosphoenolpyruvate carboxylase 1	PPC1	-1.22364	0.192729	0.123432	-0.779918	-0.491163	0.142382	4.98401e-08	0.547592	0.87643	0.000946162	0.0571844	0.854641
BnaCnng24040D	gluconeogenesis	cytosol	AT2G42600	ATPPC2_PPC2__phosphoenolpyruvate carboxylase 2	PPC2	0.142772	0.757245	0.529951	-0.0706691	0.564355	0.509322	0.685838	0.0145181	0.249186	0.884773	0.0739468	0.346622
BnaAnng39750D	gluconeogenesis	cytosol	AT2G42600	ATPPC2_PPC2__phosphoenolpyruvate carboxylase 2	PPC2	-0.7404	-0.300721	-0.249109	-0.251148	-0.0533282	-0.236293	0.142358	0.648199	0.862504	0.697241	0.959193	0.879962
BnaA05g34260D	gluconeogenesis	cytosol	AT2G42600	ATPPC2_PPC2__phosphoenolpyruvate carboxylase 2	PPC2	-0.969053	-2.46479	-0.723753	-0.817625	-4.36243	-0.0563527	0.0314015	5.42168e-08	0.327411	0.102708	1.14472e-19	1
BnaUnng02020D	gluconeogenesis	cytosol	AT2G42600	ATPPC2_PPC2__phosphoenolpyruvate carboxylase 2	PPC2	-1.57815	-0.188558	-0.64549	0.278928	-0.0641574	-0.422394	0.0551752	0.86497	0.643579	0.79873	0.972064	0.83795
BnaA04g24600D	gluconeogenesis	cytosol	AT2G42600	ATPPC2_PPC2__phosphoenolpyruvate carboxylase 2	PPC2	-1.23135	-3.63774	-0.708581	-1.5403	-3.63486	-0.187703	0.000221749	1.20704e-25	0.147618	1.44358e-05	3.63215e-20	0.864241
BnaC04g02430D	gluconeogenesis	cytosol	AT2G42600	ATPPC2_PPC2__phosphoenolpyruvate carboxylase 2	PPC2	-0.920147	-3.59575	-0.226267	-0.652211	-3.76761	-0.0831782	0.103119	8.01541e-10	0.891626	0.251891	2.64159e-13	1
BnaC04g48440D	gluconeogenesis	cytosol	AT2G42600	ATPPC2_PPC2__phosphoenolpyruvate carboxylase 2	PPC2	-1.73054	-2.91279	-0.334467	-1.79906	-3.37657	0.0422994	2.21258e-05	8.54964e-12	0.733359	1.58958e-05	3.26161e-15	1
BnaA03g33640D	gluconeogenesis	cytosol	AT3G14940	ATPPC3_PPC3__phosphoenolpyruvate carboxylase 3	PPC3	-3.05919	-1.86702	-0.340796	-1.69924	-2.6365	-0.349309	1.38354e-12	2.99478e-05	0.747581	9.10271e-05	1.6993e-09	0.764526
BnaC03g38810D	gluconeogenesis	cytosol	AT3G14940	ATPPC3_PPC3__phosphoenolpyruvate carboxylase 3	PPC3	-2.75969	-1.4353	-0.345133	0.185236	-2.03227	0.449452	1.26718e-05	0.0344432	0.890129	0.849101	0.00173312	0.846774
BnaC05g38590D	gluconeogenesis	cytosol	AT3G14940	ATPPC3_PPC3__phosphoenolpyruvate carboxylase 3	PPC3	-2.42607	-0.94897	0.51204	-1.83039	0.0426472	0.389024	8.31775e-09	0.0474931	0.764303	1.91843e-05	0.969204	0.908669
BnaA05g24610D	gluconeogenesis	cytosol	AT3G14940	ATPPC3_PPC3__phosphoenolpyruvate carboxylase 3	PPC3	-2.37938	-1.31507	-1.51683	-1.90137	-0.789022	-2.38882	2.5777e-06	0.0189539	0.16225	0.000275211	0.181246	0.159112
BnaA09g28740D	gluconeogenesis	cytosol	AT1G68750	ATPPC4_PPC4__phosphoenolpyruvate carboxylase 4	PPC4	-1.41545	-1.2926	0.49975	-0.875601	-1.03081	0.29204	3.40204e-05	0.000417772	0.573098	0.016422	0.00507767	0.851512
BnaC06g02620D	gluconeogenesis	cytosol	AT1G68750	ATPPC4_PPC4__phosphoenolpyruvate carboxylase 4	PPC4	-1.30517	-2.52407	0.220811	-1.51442	-0.0298349	-0.581707	0.404574	0.0804049	0.910553	0.150314	1	0.619598
BnaC05g20500D	gluconeogenesis	cytosol	AT1G68750	ATPPC4_PPC4__phosphoenolpyruvate carboxylase 4	PPC4	-1.43615	-2.13536	0.704302	-1.39649	-2.07196	0.575806	2.4746e-06	1.76493e-11	0.202424	8.532e-06	3.69925e-11	0.38513
BnaC01g01140D	gluconeogenesis	cytosol	AT4G37870	PCK1_PEPCK__phosphoenolpyruvate carboxykinase 1	PCK1	-0.909894	-0.0165347	-0.0148595	-0.0766915	1.12288	-0.206383	0.000152743	0.982873	1	0.844281	5.93517e-06	0.751727
BnaA01g00210D	gluconeogenesis	cytosol	AT4G37870	PCK1_PEPCK__phosphoenolpyruvate carboxykinase 1	PCK1	-0.440654	-0.205116	-0.0927626	-0.652874	-0.0272073	-0.167536	0.1783	0.640358	0.959773	0.0453414	0.976077	0.876699
BnaCnng13230D	gluconeogenesis	cytosol	AT5G65690	PCK2_PEPCK__phosphoenolpyruvate carboxykinase 2	PCK2	0.306565	-2.03416	-3.95878	0.022643	-1.48616	-1.18517	0.767358	0.0242559	0.243503	1	0.102901	0.81357
BnaAnng05000D	gluconeogenesis	cytosol	AT5G65690	PCK2_PEPCK__phosphoenolpyruvate carboxykinase 2	PCK2	0.0382045	-1.07229	-0.837542	0.172528	-1.03785	0.0104611	0.969247	0.0714088	0.886887	0.830629	0.0851551	1
BnaC02g43920D	gluconeogenesis	cytosol	AT5G65690	PCK2_PEPCK__phosphoenolpyruvate carboxykinase 2	PCK2	0.434071	-0.207915	-5.48605	0.420678	-0.468504	-1.82422	0.396835	0.763489	0.0111436	0.441505	0.404836	0.242979
BnaA06g24600D	gluconeogenesis	cytosol	AT5G65690	PCK2_PEPCK__phosphoenolpyruvate carboxykinase 2	PCK2	3.03944	-0.455131	4.81128	1.51237	-1.0006	-1.37369	8.63525e-06	0.635387	0.076493	0.0338444	0.204818	0.556736
BnaCnng27070D	gluconeogenesis	cytosol	AT1G08650	PPCK1__PPCK1 (PHOSPHOENOLPYRUVATE CARBOXYLASE KINASE); kinase	PPCK1	-3.75291	-0.818234	-0.017899	-1.46588	-0.890718	-0.0405049	2.25953e-05	0.349736	1	0.0639951	0.264066	1
BnaCnng14430D	gluconeogenesis	cytosol	AT1G08650	PPCK1__PPCK1 (PHOSPHOENOLPYRUVATE CARBOXYLASE KINASE); kinase	PPCK1	-1.86851	-0.936645	-1.59271	-0.829414	-0.999611	-0.505216	1.18137e-05	0.0533285	0.00784234	0.0709021	0.0296497	0.623626
BnaA08g31670D	gluconeogenesis	cytosol	AT1G08650	PPCK1__PPCK1 (PHOSPHOENOLPYRUVATE CARBOXYLASE KINASE); kinase	PPCK1	-1.59088	-0.865114	-0.130488	-0.5099	-0.465663	-0.111515	0.00249552	0.154583	0.97695	0.427248	0.486694	0.997771
BnaC05g06280D	gluconeogenesis	cytosol	AT1G08650	PPCK1__PPCK1 (PHOSPHOENOLPYRUVATE CARBOXYLASE KINASE); kinase	PPCK1	0.683943	0.657546	-0.199537	0.68695	-0.422808	0.0633581	0.117067	0.190805	0.884985	0.125654	0.404944	1
BnaA06g05020D	gluconeogenesis	cytosol	AT1G08650	PPCK1__PPCK1 (PHOSPHOENOLPYRUVATE CARBOXYLASE KINASE); kinase	PPCK1	-1.03312	-0.252625	-0.209931	0.924136	0.184567	-0.806619	0.00828957	0.650452	0.866574	0.0177908	0.735523	0.195816
BnaA05g32910D	gluconeogenesis	cytosol	AT3G04530	ATPPCK2_PEPCK2_PPCK2__phosphoenolpyruvate carboxylase kinase 2	PPCK2	4.7733	5.25496	0.0605495	3.67007	4.51061	2.41718	5.24469e-06	2.93724e-06	1	0.000462161	2.56527e-05	0.643611
BnaCnng44550D	gluconeogenesis	cytosol	AT3G04530	ATPPCK2_PEPCK2_PPCK2__phosphoenolpyruvate carboxylase kinase 2	PPCK2	3.16254	3.66593	0.444662	2.72169	4.04839	-1.44527	9.09919e-06	1.60043e-06	0.892782	0.000174086	6.88837e-08	0.420439
BnaC05g02530D	gluconeogenesis	cytosol	AT1G04410	c-NAD-MDH1__Lactate/malate dehydrogenase family protein	C-NAD-MDH1	-0.0567959	-0.065921	-0.219764	0.00552112	-0.00603265	0.376134	0.882203	0.890083	0.726719	1	1	0.496401
BnaA10g02560D	gluconeogenesis	cytosol	AT1G04410	c-NAD-MDH1__Lactate/malate dehydrogenase family protein	C-NAD-MDH1	-0.728722	-0.697062	-0.188185	-0.605395	-0.859646	0.126076	0.00071639	0.00285656	0.711937	0.00741871	0.00012265	0.864241
BnaCnng55040D	gluconeogenesis	cytosol	AT1G04410	c-NAD-MDH1__Lactate/malate dehydrogenase family protein	C-NAD-MDH1	-0.916321	-0.391775	0.0223494	-0.590754	-0.509772	0.0305364	5.4016e-05	0.158421	1	0.0152716	0.047804	1
BnaA08g27880D	gluconeogenesis	cytosol	AT1G04410	c-NAD-MDH1__Lactate/malate dehydrogenase family protein	C-NAD-MDH1	-0.919597	-0.340697	-0.0571372	-0.675196	-1.00867	-1.29639	0.0997982	0.656402	1	0.277338	0.0953883	0.126916
BnaC09g17480D	gluconeogenesis	cytosol	AT5G43330	c-NAD-MDH2__Lactate/malate dehydrogenase family protein	C-NAD-MDH2	-0.384734	-0.287466	-0.251741	-0.200399	-0.542978	0.0166886	0.141611	0.362777	0.638434	0.5198	0.0443514	1
BnaA09g16400D	gluconeogenesis	cytosol	AT5G43330	c-NAD-MDH2__Lactate/malate dehydrogenase family protein	C-NAD-MDH2	0.264492	0.0369139	0.522885	0.17508	-0.111703	-0.210125	0.464706	0.958176	0.326451	0.681197	0.818703	0.822414
BnaA06g08600D	gluconeogenesis	cytosol	AT5G43330	c-NAD-MDH2__Lactate/malate dehydrogenase family protein	C-NAD-MDH2	0.199683	-0.156208	0.00133801	-4.26176	0.190238	3.53014	0.789323	0.878549	1	0.00983886	0.95513	0.376381
BnaA10g10850D	gluconeogenesis	cytosol	AT5G56720	c-NAD-MDH3__Lactate/malate dehydrogenase family protein	C-NAD-MDH3	-0.281543	-0.334841	0.122774	-0.521272	-0.709286	-0.19259	0.396322	0.373797	0.935695	0.0921339	0.0205665	0.851512
BnaC09g33250D	gluconeogenesis	cytosol	AT5G56720	c-NAD-MDH3__Lactate/malate dehydrogenase family protein	C-NAD-MDH3	-0.461562	-0.64843	0.256785	-0.65902	-0.840946	0.324143	0.187207	0.0880093	0.787658	0.0611857	0.0168045	0.721652
BnaCnng15110D	malate shuttle	plastid	AT3G47520	MDH_pNAD-MDH__malate dehydrogenase	P-NAD-MDH	-1.13586	-0.887249	-0.635981	-0.292895	-1.01243	-0.364517	1.07813e-05	0.00164646	0.101161	0.359882	0.000210907	0.523342
BnaA06g38600D	malate shuttle	plastid	AT3G47520	MDH_pNAD-MDH__malate dehydrogenase	P-NAD-MDH	-1.06225	-0.549284	-0.186284	-0.549356	-0.739764	-0.320052	0.00018363	0.102326	0.82063	0.0828849	0.0177911	0.645092
BnaC02g10780D	malate shuttle	plastid	AT5G58330	lactate/malate dehydrogenase family protein	MDH-like	1.83966	0.53756	0.129637	0.851565	0.309036	0.313935	0.00123085	0.277165	0.884236	0.135171	0.591014	0.59874
BnaA03g09800D	malate shuttle	plastid	AT5G58330	lactate/malate dehydrogenase family protein	MDH-like	-1.38348	-1.42403	-0.145839	0.239483	-1.78415	-0.28063	0.022851	0.0523186	0.958049	0.793535	0.0077303	0.856038
BnaCnng38370D	malate shuttle	plastid	AT5G58330	lactate/malate dehydrogenase family protein	MDH-like	-0.250526	0.0136371	0.203843	-0.396487	-0.492248	0.429664	0.576628	0.997435	0.867134	0.391848	0.270015	0.612401
BnaA10g11990D	malate shuttle	plastid	AT5G58330	lactate/malate dehydrogenase family protein	MDH-like	1.08902	0.969185	-0.0230042	0.621604	0.764573	0.154884	0.00117126	0.0129353	1	0.0863126	0.027405	0.838087
BnaC09g33800D	malate shuttle	plastid	AT5G58330	lactate/malate dehydrogenase family protein	MDH-like	0.825524	0.43003	0.0827232	0.370883	0.199496	0.129918	0.000359473	0.12835	0.928486	0.161642	0.515172	0.850698
BnaA02g07730D	malate shuttle	plastid	AT5G58330	lactate/malate dehydrogenase family protein	MDH-like	1.50618	0.0584094	0.0370742	0.840554	2.42876	0.385515	0.0387928	0.956014	1	0.542249	0.0249166	0.498863
BnaC03g12430D	malate shuttle	plastid	AT5G58330	lactate/malate dehydrogenase family protein	MDH-like	0.874323	-0.00104306	0.160515	0.275432	0.765718	0.317571	0.231965	1	0.972476	0.824444	0.527897	0.879626
BnaC07g13760D	malate shuttle	plastid	AT5G58330	lactate/malate dehydrogenase family protein	MDH-like	-0.79517	-0.308431	-0.80586	-0.88258	-0.473433	-0.405757	0.0202082	0.501273	0.134023	0.0134768	0.258003	0.628262
BnaA09g08320D	malate shuttle	mito	AT2G13560	NAD-ME1__NAD-dependent malic enzyme 1	NAD-ME1	-1.09363	-0.293365	0.0803643	-0.711483	-0.178636	0.113115	2.0493e-10	0.175059	0.905933	7.42645e-05	0.436496	0.843204
BnaC09g08590D	malate shuttle	mito	AT2G13560	NAD-ME1__NAD-dependent malic enzyme 1	NAD-ME1	-0.657074	-0.117106	-0.101824	-0.433932	0.00011506	0.160602	0.000350517	0.670297	0.865275	0.028923	1	0.741628
BnaCnng42260D	malate shuttle	mito	AT2G13560	NAD-ME1__NAD-dependent malic enzyme 1	NAD-ME1	0.119756	1.52095	0.458698	-0.965248	0.901447	0.710243	0.791299	0.000278258	0.65461	0.109343	0.127386	0.41338
BnaCnng02240D	malate shuttle	mito	AT4G00570	NAD-ME2__NAD-dependent malic enzyme 2	NAD-ME2	-0.637434	-1.29107	-1.02411	-0.460274	-0.894522	-0.894032	0.775498	0.589566	0.834066	0.867825	0.715802	0.884595
BnaCnng60330D	malate shuttle	mito	AT4G00570	NAD-ME2__NAD-dependent malic enzyme 2	NAD-ME2	-0.751091	-0.0694545	0.596834	-0.171453	-1.13468	-1.23999	0.238342	0.956727	0.657387	0.85581	0.0853467	0.244793
BnaA03g27070D	malate shuttle	mito	AT4G00570	NAD-ME2__NAD-dependent malic enzyme 2	NAD-ME2	-0.978296	-0.618548	-0.0227014	-0.84375	-0.574821	0.0792593	0.000615769	0.0590222	1	0.00444455	0.0739582	0.981891
BnaA09g51860D	malate shuttle	mito	AT4G00570	NAD-ME2__NAD-dependent malic enzyme 2	NAD-ME2	-0.960578	-0.210344	0.476992	-0.44193	-0.0843125	0.334027	0.0135596	0.715549	0.535548	0.334296	0.903862	0.737938
	malate shuttle	cytosol	AT2G19900	ATNADP-ME1_NADP-ME1__NADP-malic enzyme 1	NADP-ME1
BnaC02g03980D	malate shuttle	cytosol	AT5G11670	ATNADP-ME2_NADP-ME2__NADP-malic enzyme 2	NADP-ME2	-1.33234	-1.49577	-0.202676	-0.410403	-0.509359	0.535223	0.0834491	0.0777214	0.969164	0.680279	0.609719	0.800237
BnaA02g35010D	malate shuttle	cytosol	AT5G11670	ATNADP-ME2_NADP-ME2__NADP-malic enzyme 2	NADP-ME2	-0.301379	-0.571655	-0.0949987	0.253517	-0.886222	-0.738922	0.683583	0.466557	1	0.769731	0.203484	0.584124
BnaA03g03440D	malate shuttle	cytosol	AT5G11670	ATNADP-ME2_NADP-ME2__NADP-malic enzyme 2	NADP-ME2	-0.105711	0.441357	0.708081	-0.154255	0.580037	0.429336	0.834533	0.350695	0.232897	0.777429	0.181321	0.622684
BnaC03g04930D	malate shuttle	cytosol	AT5G11670	ATNADP-ME2_NADP-ME2__NADP-malic enzyme 2	NADP-ME2	0.720055	-0.447475	1.43397	0.304168	0.41085	0.210973	0.542252	0.772976	0.462442	0.846831	0.784594	0.998459
BnaC07g29000D	malate shuttle	cytosol	AT5G25880	ATNADP-ME3_NADP-ME3__NADP-malic enzyme 3	NADP-ME3	-2.44635	-2.42726	-0.0216621	-1.74626	-1.97401	-0.278194	1.93335e-10	1.20384e-09	1	5.6625e-06	5.97791e-07	0.80422
BnaA06g27940D	malate shuttle	cytosol	AT5G25880	ATNADP-ME3_NADP-ME3__NADP-malic enzyme 3	NADP-ME3	0.0890225	0.00567248	-0.349735	0.0500068	0.25203	-0.0854686	0.857243	1	0.638825	0.949468	0.59549	0.987792
BnaC06g22080D	malate shuttle	plastid	AT1G79750	ATNADP-ME4_NADP-ME4__NADP-malic enzyme 4	NADP-ME4	2.87117	1.48638	-0.081404	3.00007	1.60943	-0.007348	7.67752e-10	0.00338751	1	2.25079e-10	0.00106144	1
BnaA07g21550D	malate shuttle	plastid	AT1G79750	ATNADP-ME4_NADP-ME4__NADP-malic enzyme 4	NADP-ME4	3.54583	2.25683	0.0496991	3.65228	1.95846	0.0725233	1.48092e-10	9.67497e-05	1	7.31792e-11	0.000608142	1
