# Supplementary material for: Transcriptional Response of Two Brassica napus Cultivars to Short-Term Hypoxia in the Root Zone
Source: Front Plant Sci. 2022 Apr 29;13:897673. doi: 10.3389/fpls.2022.897673 (PMC9100894; doi:10.3389/fpls.2022.897673)
Supplement: Supplementary file 7 [file Data_Sheet_7.XLSX]

## Sheet: description
Supporting information
Table S6: Hormone-related expression data
Heatmaps of different hormone-associated pathways (metabolism and signaling)
Gene assignment to pathways was based on annotations of genes of Arabidopsis thaliana
according to KEGG annotation
color code	SLR
-3	0	3
-3	0	3
	FDR > 0.01
	gene not expressed in Bna

## Sheet: ABA
ID	KEGG_ID	HitDesc	AGI	symbol	description	KEGG_Ath	pathway	logFC Root_H4h_AV	logFC Root_H24h_AV	logFC Leaf_H24h_AV	logFC Root_H4h_ZS	logFC Root_H24h_ZS	logFC Leaf_H24h_ZS	FDR Root_H4h_AV	FDR Root_H24h_AV	FDR Leaf_H24h_AV	FDR Root_H4h_ZS	FDR Root_H24h_ZS	FDR Leaf_H24h_ZS
BnaA05g25030D	106423568	9-cis-epoxycarotenoid dioxygenase NCED3, chloroplastic-like	AT3G14440.1	NCED3	nine-cis-epoxycarotenoid dioxygenase 3	K09840	ABA biosynthesis	-0.557598	0.9601	0.441317	-1.03751	-0.971817	0.452579	0.505593	0.26804	0.821331	0.261492	0.302937	0.870407
BnaC05g39200D	106394225	9-cis-epoxycarotenoid dioxygenase NCED3, chloroplastic	AT3G14440.1	NCED3	nine-cis-epoxycarotenoid dioxygenase 3	K09840	ABA biosynthesis	-1.64166	-0.748445	-0.394006	-0.890224	-0.76146	0.326648	0.0360212	0.324233	0.820843	0.230688	0.304086	0.882125
BnaA03g33400D	106439368	9-cis-epoxycarotenoid dioxygenase NCED3, chloroplastic-like isoform X1	AT3G14440.1	NCED3	nine-cis-epoxycarotenoid dioxygenase 3	K09840	ABA biosynthesis	-2.00281	-2.22412	-0.0746956	-0.390768	0.264745	0.212536	0.251185	0.111511	1	0.885744	0.907661	0.984852
BnaA01g29390D	106348955	9-cis-epoxycarotenoid dioxygenase NCED3, chloroplastic isoform X2][protein_id	AT3G14440.1	NCED3	nine-cis-epoxycarotenoid dioxygenase 3	K09840	ABA biosynthesis	-4.34934	-2.07949	1.23755	-3.43355	-2.24058	0.125511	0.000157365	0.0698404	0.547209	0.00549206	0.052971	1
BnaC01g36910D	106348955	9-cis-epoxycarotenoid dioxygenase NCED3, chloroplastic isoform X1][protein_id	AT3G14440.1	NCED3	nine-cis-epoxycarotenoid dioxygenase 3	K09840	ABA biosynthesis	-4.4101	-2.32378	0.016181	-3.67526	-3.46057	0.249697	6.45102e-06	0.0126977	1	0.000179044	0.000211793	0.9692
BnaC06g38870D	106354557	9-cis-epoxycarotenoid dioxygenase NCED9, chloroplastic	AT1G78390.1	NCED9	nine-cis-epoxycarotenoid dioxygenase 9	K09840	ABA biosynthesis	-1.08142	-0.794205	1.04374	-1.91145	-2.49814	-1.21251	0.155095	0.497732	0.534394	0.00508389	0.000409187	0.691018
BnaA01g09900D	106432936	probable carotenoid cleavage dioxygenase 4, chloroplastic	AT4G19170.1	NCED4	nine-cis-epoxycarotenoid dioxygenase 4	K09840	ABA biosynthesis	-0.175129	-0.12953	0.132008	-0.333528	-0.680523	0.600561	0.727507	0.850911	0.925721	0.547092	0.1681	0.323059
BnaC01g11550D	106377068	probable carotenoid cleavage dioxygenase 4, chloroplastic	AT4G19170.1	NCED4	nine-cis-epoxycarotenoid dioxygenase 4	K09840	ABA biosynthesis	-0.332384	-0.359279	0.25764	-0.798832	-0.771782	0.480891	0.618653	0.659111	0.776227	0.193128	0.200825	0.523507
BnaA06g01590D	106345736	xanthoxin dehydrogenase	AT1G52340.1	ABA2	NAD(P)-binding Rossmann-fold superfamily protein	K09841	ABA biosynthesis	2.04062	0.660361	-0.740702	1.57607	0.730141	-0.731463	1.39101e-07	0.170999	0.290979	7.11094e-05	0.109396	0.361449
BnaC06g41140D	106390565	xanthoxin dehydrogenase	AT1G52340.1	ABA2	NAD(P)-binding Rossmann-fold superfamily protein	K09841	ABA biosynthesis	2.00805	1.30998	0.0587152	1.76087	1.51429	-0.183774	2.00319e-08	0.000807735	1	1.37086e-06	6.99564e-05	0.892599
BnaC03g69290D	106390565	xanthoxin dehydrogenase	AT1G52340.1	ABA2	NAD(P)-binding Rossmann-fold superfamily protein	K09841	ABA biosynthesis	1.15064	-0.577736	-0.119001	0.775085	0.898114	-0.356176	0.0592516	0.521699	0.978719	0.269811	0.249574	0.836755
BnaA08g01500D	106390565	xanthoxin dehydrogenase	AT1G52340.1	ABA2	NAD(P)-binding Rossmann-fold superfamily protein	K09841	ABA biosynthesis	0.965547	0.598056	-0.12705	0.0845044	0.736806	-0.227616	0.0984751	0.551258	0.96952	0.944772	0.431527	0.909783
BnaAnng14580D	106446766	abscisic-aldehyde oxidase-like	AT2G27150.2	AAO3	abscisic aldehyde oxidase 3	K09842	ABA biosynthesis	0.814823	-0.37748	2.3531	-0.382256	-0.363024	0.290764	0.273264	0.772647	0.00851531	0.59376	0.644702	0.883405
BnaA04g15640D	106446766	abscisic-aldehyde oxidase-like	AT2G27150.2	AAO3	abscisic aldehyde oxidase 3	K09842	ABA biosynthesis	0.188721	-0.129306	0.279445	0.402275	0.0870166	0.357019	0.603191	0.799108	0.678947	0.232736	0.865182	0.592751
BnaC04g38650D	106445448	abscisic-aldehyde oxidase-like	AT2G27150.2	AAO3	abscisic aldehyde oxidase 3	K09842	ABA biosynthesis	-0.6488	-0.403575	0.0638694	-0.345584	-0.488607	-0.00676432	0.00654878	0.16218	0.972166	0.200239	0.0714296	1
BnaCnng32820D	106391222	abscisic acid 8'-hydroxylase 2 isoform X1	AT2G29090.4	CYP707A2	cytochrome P450, family 707, subfamily A, polypeptide 2	K09843	ABA degradation	-0.0557453	-1.61919	0.945689	0.00403425	0.00445567	0.983896	1	0.451008	0.443216	1	1	0.468514
BnaC04g40260D	111197871	abscisic acid 8'-hydroxylase 2 isoform X1	AT2G29090.2	CYP707A2	cytochrome P450, family 707, subfamily A, polypeptide 2	K09843	ABA degradation	-0.463594	2.46091	1.14816	-1.62932	0.00712733	0.73663	0.844856	0.239836	0.241844	0.432146	1	0.59239
BnaA04g16900D	106446905	abscisic acid 8'-hydroxylase 2-like	AT2G29090.2	CYP707A2	cytochrome P450, family 707, subfamily A, polypeptide 2	K09843	ABA degradation	-0.981875	0.037527	0.563498	-2.40907	-1.35255	0.484003	0.52227	1	0.467816	0.233185	0.45739	0.615236
BnaA05g20890D	106416608	abscisic acid 8'-hydroxylase 4	AT3G19270.2	CYP707A4	cytochrome P450, family 707, subfamily A, polypeptide 4	K09843	ABA degradation	-0.00925062	-2.38513	2.21728	0.0252936	1.88182	1.26649	1	0.254628	0.007179	1	0.379726	0.206467
BnaC05g33590D	111204767	abscisic acid 8'-hydroxylase 4	AT3G19270.2	CYP707A4	cytochrome P450, family 707, subfamily A, polypeptide 4	K09843	ABA degradation	-3.27681	-1.57642	1.17843	-3.5121	-3.00803	1.43075	0.0450875	0.38899	0.153395	0.0519975	0.0243614	0.081876
BnaC02g31560D	106361235	abscisic acid 8'-hydroxylase 3-like	AT5G45340.1	CYP707A3	cytochrome P450, family 707, subfamily A, polypeptide 3	K09843	ABA degradation	2.03315	0.972639	0.652532	1.76786	0.401398	1.37406	0.000166728	0.12475	0.730196	0.00149744	0.576304	0.346085
BnaA09g17560D	106427439	abscisic acid 8'-hydroxylase 3	AT5G45340.1	CYP707A3	cytochrome P450, family 707, subfamily A, polypeptide 3	K09843	ABA degradation	1.01649	1.10789	0.0522613	1.24336	1.16471	0.547934	0.0207945	0.0210954	1	0.00538188	0.0119724	0.811559
BnaC09g18860D	106416491	abscisic acid 8'-hydroxylase 3	AT5G45340.1	CYP707A3	cytochrome P450, family 707, subfamily A, polypeptide 3	K09843	ABA degradation	0.461317	0.42625	1.17692	0.434922	0.104623	0.597181	0.254374	0.370175	0.150149	0.318843	0.865433	0.502154
BnaCnng57040D	106425473	abscisic acid 8'-hydroxylase 3	AT5G45340.1	CYP707A3	cytochrome P450, family 707, subfamily A, polypeptide 3	K09843	ABA degradation	-0.774108	-0.373961	-0.42152	-0.63681	-0.480363	1.11452	0.267085	0.687754	0.953687	0.406566	0.569134	0.730899
BnaC07g18360D	106379426	abscisic acid 8'-hydroxylase 3	AT5G45340.1	CYP707A3	cytochrome P450, family 707, subfamily A, polypeptide 3	K09843	ABA degradation	-3.81559	-0.768494	-3.13187	-3.47987	-1.29615	-2.12592	8.80305e-11	0.271319	0.438799	3.23304e-09	0.0372859	0.726958
BnaAnng05520D	106386394	abscisic acid 8'-hydroxylase 3	AT5G45340.1	CYP707A3	cytochrome P450, family 707, subfamily A, polypeptide 3	K09843	ABA degradation	-3.86912	-1.81085	0.799789	-3.72733	-2.24534	-4.14938	4.71407e-11	0.00313769	0.896131	3.11784e-10	0.000162966	0.273862
BnaC01g11650D	106374933	abscisic acid 8'-hydroxylase 1-like	AT4G19230.1	CYP707A1	cytochrome P450, family 707, subfamily A, polypeptide 1	K09843	ABA degradation	0.721493	-0.251791	-0.451188	1.09652	-0.445029	0.128722	0.0503921	0.61267	0.678822	0.00288984	0.299399	0.976628
BnaA03g43960D	106419785	abscisic acid 8'-hydroxylase 1	AT4G19230.1	CYP707A1	cytochrome P450, family 707, subfamily A, polypeptide 1	K09843	ABA degradation	-0.134518	-0.977721	0.54219	-0.282185	-0.587495	-0.174441	0.801628	0.0294854	0.659624	0.592541	0.215794	0.983924
BnaC07g35800D	111208232	abscisic acid 8'-hydroxylase 1-like	AT4G19230.1	CYP707A1	cytochrome P450, family 707, subfamily A, polypeptide 1	K09843	ABA degradation	-0.259761	-0.0978524	1.62739	-0.721919	-1.31384	-1.84558	0.633001	0.905131	0.11742	0.164729	0.00701183	0.205796
BnaAnng27240D	106373335	abscisic acid 8'-hydroxylase 1-like isoform X2	AT4G19230.1	CYP707A1	cytochrome P450, family 707, subfamily A, polypeptide 1	K09843	ABA degradation	-0.391946	-0.76701	0.368415	-0.464313	-1.10185	-0.463842	0.363203	0.0769031	0.87786	0.301359	0.00625258	0.839629
BnaC06g05340D	106345733	beta-D-glucopyranosyl abscisate beta-glucosidase-like	AT1G52400.3	BGLU18	beta glucosidase 18	K15748	ABA degradation	1.93724	-0.954072	1.05324	0.20645	-1.03748	0.127063	0.116213	0.636827	0.619114	0.957069	0.644702	1
BnaA06g01540D	106345733	beta-D-glucopyranosyl abscisate beta-glucosidase-like	AT1G52400.3	BGLU18	beta glucosidase 18	K15748	ABA degradation	1.39327	-0.357623	1.69041	0.895332	-0.549577	0.866259	0.10725	0.779811	0.180984	0.358313	0.618472	0.64255
BnaA05g14890D	106445716	beta-D-glucopyranosyl abscisate beta-glucosidase-like	AT1G52400.3	BGLU18	beta glucosidase 18	K15748	ABA degradation	-1.28824	-1.54824	1.35958	-0.53526	-1.4872	-0.166225	0.0129009	0.00579403	0.0502122	0.384925	0.00646179	0.960088
BnaC04g56560D	106402367	abscisic acid receptor PYL4	AT2G38310.1	PYL4	PYR1-like 4	K14496	ABA signaling	1.44117	0.894888	-0.478343	1.11861	1.12582	-1.24983	4.43735e-06	0.0113317	0.560885	0.000589359	0.000787418	0.0258199
BnaA03g17720D	106438157	abscisic acid receptor PYL4-like	AT2G38310.1	PYL4	PYR1-like 4	K14496	ABA signaling	1.05353	0.504397	-0.84848	1.15774	0.414104	-0.990843	0.000344377	0.15714	0.0796051	0.000113464	0.247585	0.0397656
BnaA04g21960D	106447667	abscisic acid receptor PYL4	AT2G38310.1	PYL4	PYR1-like 4	K14496	ABA signaling	0.931971	0.700718	0.157836	0.232468	0.919778	-0.791907	0.00640447	0.0758066	0.910489	0.605784	0.0130404	0.192157
BnaC03g21240D	106427731	abscisic acid receptor PYL4	AT2G38310.1	PYL4	PYR1-like 4	K14496	ABA signaling	0.382455	-0.313818	-0.489298	0.425706	-0.385728	-0.720165	0.221299	0.408508	0.587471	0.189993	0.263409	0.257242
BnaC04g07010D	106410560	abscisic acid receptor PYL4	AT2G38310.1	PYL4	PYR1-like 4	K14496	ABA signaling	-0.0875972	-0.0391695	-0.734896	-0.801632	-0.133592	-1.49689	0.87382	0.967372	0.49714	0.0543543	0.82909	0.137445
BnaAnng13200D	106410560	abscisic acid receptor PYL4	AT2G38310.1	PYL4	PYR1-like 4	K14496	ABA signaling	-0.847599	-0.793595	-0.486964	-1.0645	-0.207945	0.301012	0.186846	0.285801	0.790864	0.105181	0.825694	0.922187
BnaA05g05420D	106450920	abscisic acid receptor PYL6 isoform X3	AT2G40330.1	PYL6	PYR1-like 6	K14496	ABA signaling	2.18359	2.08162	0.0187335	1.87674	3.09377	-2.14054	2.70889e-06	3.46677e-05	1	7.71897e-05	2.75134e-10	0.725771
BnaC04g04830D	106450920	abscisic acid receptor PYL6 isoform X1	AT2G40330.1	PYL6	PYR1-like 6	K14496	ABA signaling	1.80729	2.30987	1.76735	1.33983	2.5035	2.48385	4.50839e-05	9.49131e-07	0.572021	0.00371618	6.56393e-08	0.349882
BnaC04g47050D	106391643	abscisic acid receptor PYL6-like isoform X1	AT2G40330.1	PYL6	PYR1-like 6	K14496	ABA signaling	1.22825	1.21692	0.442812	0.825493	1.47925	-0.250443	0.00344634	0.00797495	0.766908	0.0709122	0.000824315	0.94254
BnaA04g29300D	106447538	abscisic acid receptor PYL6	AT2G40330.1	PYL6	PYR1-like 6	K14496	ABA signaling	1.21104	0.980964	-0.6466	1.05514	1.80532	-0.619364	0.00159858	0.0221933	0.515829	0.00843562	5.35007e-06	0.588721
BnaA03g19030D	106438029	abscisic acid receptor PYL6	AT2G40330.1	PYL6	PYR1-like 6	K14496	ABA signaling	0.824279	2.77173	-2.28982	0.567139	3.60589	-3.01256	0.0997848	8.76273e-08	0.638434	0.313461	4.11789e-12	0.564798
BnaC03g22610D	106388157	abscisic acid receptor PYL6-like isoform X1	AT2G40330.1	PYL6	PYR1-like 6	K14496	ABA signaling	0.729295	1.55041	-0.413295	0.376812	2.36576	-0.429025	0.109252	0.00080187	0.814155	0.483517	1.12763e-07	0.815911
BnaA03g26790D	106438631	abscisic acid receptor PYL7-like	AT4G01026.1	PYL7	PYR1-like 7	K14496	ABA signaling	3.79599	2.54653	0.574315	1.82185	1.70564	0.610247	8.54216e-20	1.97881e-09	0.459306	8.09359e-06	6.2496e-05	0.489561
BnaC03g31730D	106388755	abscisic acid receptor PYL7-like	AT4G01026.1	PYL7	PYR1-like 7	K14496	ABA signaling	3.376	2.71092	-0.00078854	2.20434	2.28037	0.513065	5.95551e-16	2.73827e-10	1	9.19988e-08	8.74679e-08	0.58033
BnaA03g43410D	106410251	abscisic acid receptor PYR1	AT4G17870.1	PYR1	Polyketide cyclase/dehydrase and lipid transport superfamily protein	K14496	ABA signaling	1.0448	1.28277	0.0426175	0.187795	1.3938	-0.0611123	0.000188424	1.45059e-05	1	0.623213	2.03473e-06	1
BnaC07g34880D	106410251	abscisic acid receptor PYR1	AT4G17870.1	PYR1	Polyketide cyclase/dehydrase and lipid transport superfamily protein	K14496	ABA signaling	0.777805	0.966094	0.270238	0.173218	1.09316	-0.206867	0.00250631	0.000403658	0.662942	0.612857	3.51885e-05	0.792958
BnaCnng65400D	106359470	abscisic acid receptor PYR1-like	AT4G17870.1	PYR1	Polyketide cyclase/dehydrase and lipid transport superfamily protein	K14496	ABA signaling	0.522621	1.22549	0.532768	0.30384	1.70025	-0.104186	0.215278	0.00416469	0.503449	0.531464	1.85827e-05	0.984939
BnaC08g11070D	106444064	abscisic acid receptor PYR1-like isoform X2	AT4G17870.1	PYR1	Polyketide cyclase/dehydrase and lipid transport superfamily protein	K14496	ABA signaling	0.228687	0.0527134	0.0627945	0.0908048	0.171546	-0.475008	0.556617	0.938543	1	0.86569	0.722974	0.669768
BnaAnng26820D	106366844	abscisic acid receptor PYR1-like	AT4G17870.1	PYR1	Polyketide cyclase/dehydrase and lipid transport superfamily protein	K14496	ABA signaling	-0.265681	-1.00424	-0.739363	-0.811978	-0.771657	0.327798	0.606732	0.0328166	0.296698	0.0795478	0.109859	0.779021
BnaAnng35310D	106427240	abscisic acid receptor PYR1-like	AT4G17870.1	PYR1	Polyketide cyclase/dehydrase and lipid transport superfamily protein	K14496	ABA signaling	-0.273572	2.51912	0.136323	0.362569	0.371141	-1.33976	0.846503	0.0398176	1	0.860487	0.849539	0.58187
BnaA08g08460D	106360843	abscisic acid receptor PYR1-like	AT4G17870.1	PYR1	Polyketide cyclase/dehydrase and lipid transport superfamily protein	K14496	ABA signaling	-0.534412	-0.832168	-0.735384	-0.897406	-0.603268	-0.172845	0.0438858	0.00325475	0.138211	0.000570725	0.0363777	0.892202
BnaC09g19620D	106446153	abscisic acid receptor PYR1-like	AT4G17870.1	PYR1	Polyketide cyclase/dehydrase and lipid transport superfamily protein	K14496	ABA signaling	-0.673142	-0.899552	0.0854048	-1.28031	-1.34803	0.235856	0.110523	0.0437445	0.986293	0.00153699	0.00120219	0.843692
BnaC09g49910D	106440679	abscisic acid receptor PYL5	AT5G05440.1	PYL5	Polyketide cyclase/dehydrase and lipid transport superfamily protein	K14496	ABA signaling	1.36757	1.40521	-0.391851	0.814214	1.51924	-0.838085	0.000231635	0.000445908	0.839302	0.0431386	9.62665e-05	0.580905
BnaA10g24990D	106419095	abscisic acid receptor PYL5-like	AT5G05440.1	PYL5	Polyketide cyclase/dehydrase and lipid transport superfamily protein	K14496	ABA signaling	1.16415	1.34966	0.201167	0.338906	1.28129	-2.57956	0.000617792	0.000195918	0.982501	0.422296	0.00033754	0.251766
BnaC03g02130D	106382978	abscisic acid receptor PYL5-like	AT5G05440.1	PYL5	Polyketide cyclase/dehydrase and lipid transport superfamily protein	K14496	ABA signaling	0.997889	0.674509	4.58561	0.683803	1.00919	-3.78097	0.00558892	0.110866	0.0846773	0.0809952	0.00870583	0.357662
BnaAnng40650D	106427953	abscisic acid receptor PYL5 isoform X1	AT5G05440.1	PYL5	Polyketide cyclase/dehydrase and lipid transport superfamily protein	K14496	ABA signaling	0.593679	0.50501	0.531645	0.382974	0.716566	0.0443045	0.0558006	0.159864	0.929584	0.27143	0.0273518	1
BnaA06g40220D	106380004	abscisic acid receptor PYL11	AT5G45860.1	PYL11	PYR1-like 11	K14496	ABA signaling	1.74587	2.12927	0.0281773	3.46169	1.90521	-0.00911323	0.0157166	0.0259277	1	1.69207e-06	0.0116497	1
BnaC07g19450D	106407039	abscisic acid receptor PYR1	AT5G46790.2	PYL1	PYR1-like 1	K14496	ABA signaling	-1.72294	-1.71368	-0.281563	-1.65503	-1.59854	0.143133	1.61504e-12	1.65914e-12	0.614431	2.68433e-11	7.16779e-11	0.871121
BnaA06g40360D	106397066	abscisic acid receptor PYR1-like isoform X1	AT5G46790.2	PYL1	PYR1-like 1	K14496	ABA signaling	-1.7889	-1.56416	-0.231278	-1.53465	-1.5612	-0.15707	4.20413e-11	1.29946e-08	0.725112	1.97677e-08	9.28514e-09	0.867874
BnaA10g06520D	106430535	abscisic acid receptor PYL8	AT5G53160.2	RCAR3	regulatory components of ABA receptor 3	K14496	ABA signaling	1.61227	1.07457	-0.0187179	1.7451	1.12028	0.174916	4.50264e-08	0.000872661	1	4.56935e-09	0.000373118	0.878754
BnaCnng37890D	106416497	abscisic acid receptor PYL8	AT5G53160.2	RCAR3	regulatory components of ABA receptor 3	K14496	ABA signaling	1.20262	0.992168	0.193008	1.34844	0.875158	-0.244382	0.00686448	0.0481171	0.915527	0.00287444	0.0803965	0.877295
BnaC02g14540D	106367534	abscisic acid receptor PYL8 isoform X2	AT5G53160.2	RCAR3	regulatory components of ABA receptor 3	K14496	ABA signaling	0.685083	0.338891	-0.276995	0.370571	0.280062	0.0307067	0.00311143	0.255563	0.743523	0.148472	0.319809	1
BnaA03g12450D	106437562	abscisic acid receptor PYL8	AT5G53160.2	RCAR3	regulatory components of ABA receptor 3	K14496	ABA signaling	0.650653	1.45079	-1.48607	0.284282	1.33928	-0.011811	0.0704258	0.000128232	0.643238	0.509771	0.000191773	1
BnaC03g15210D	106437508	abscisic acid receptor PYL8-like	AT5G53160.2	RCAR3	regulatory components of ABA receptor 3	K14496	ABA signaling	0.312903	0.14959	0.175966	0.208801	0.384548	-0.341494	0.432021	0.786676	0.928588	0.655867	0.374717	0.761305
BnaA02g10420D	106391759	abscisic acid receptor PYL8-like isoform X2	AT5G53160.2	RCAR3	regulatory components of ABA receptor 3	K14496	ABA signaling	-0.0190816	-0.397556	0.116208	-0.317019	-1.06559	-0.285766	0.983185	0.417034	0.960759	0.528467	0.00954272	0.804223
BnaC06g17940D	111206767	abscisic acid receptor PYL9-like	AT1G01360.1	RCAR1	regulatory component of ABA receptor 1	K14496	ABA signaling	1.86468	-0.54029	-0.716951	-0.015892	-0.0593229	-0.146959	3.16446e-05	0.350317	0.411031	1	0.952857	0.965514
BnaA07g38130D	106353281	abscisic acid receptor PYL9	AT1G01360.1	RCAR1	regulatory component of ABA receptor 1	K14496	ABA signaling	1.47633	-0.712222	0.617283	0.178038	-0.00715282	0.521801	0.00572259	0.260303	0.705888	0.829859	1	0.751058
BnaA10g00540D	106370878	abscisic acid receptor PYL9	AT1G01360.1	RCAR1	regulatory component of ABA receptor 1	K14496	ABA signaling	-0.195222	1.29162	0.111208	-0.433884	0.524058	0.256771	0.592518	3.20527e-05	0.939528	0.213094	0.12732	0.7623
BnaC05g17260D	106397215	abscisic acid receptor PYL9-like	AT1G01360.1	RCAR1	regulatory component of ABA receptor 1	K14496	ABA signaling	-0.944223	-0.237506	-0.140323	-0.157612	-0.221339	0.137533	0.00495152	0.617679	0.917844	0.741874	0.627306	0.934109
BnaC05g00620D	106397289	abscisic acid receptor PYL9	AT1G01360.1	RCAR1	regulatory component of ABA receptor 1	K14496	ABA signaling	-1.01171	-0.196457	-0.120496	-0.980287	-0.463894	0.13495	9.78438e-05	0.620404	0.903556	0.000257759	0.138049	0.888926
BnaA09g40690D	106365123	abscisic acid receptor PYL2	AT2G26040.1	PYL2	PYR1-like 2	K14496	ABA signaling	-1.0063	-0.94867	-0.124687	-1.31732	0.764088	0.323356	0.0505302	0.106799	0.996648	0.0788744	0.411106	0.871346
BnaC08g33170D	106429971	abscisic acid receptor PYL2-like	AT2G26040.1	PYL2	PYR1-like 2	K14496	ABA signaling	-1.78387	-3.85656	0.845966	-0.581417	-1.41393	0.217577	0.000501176	4.40489e-10	0.378171	0.326648	0.0107386	0.938632
BnaC06g06590D	106419899	protein phosphatase 2C 3	AT1G07430.1	HAI2	highly ABA-induced PP2C protein 2	K14497	ABA signaling	-0.0176625	0.0139624	-0.00436484	2.54471	3.33453	2.83452	1	1	1	0.337784	0.221708	0.616346
BnaA08g23040D	106387626	protein phosphatase 2C 7-like	AT1G17550.2	HAB2	homology to ABI2	K14497	ABA signaling	-0.55311	-0.276323	0.303818	-0.911073	-0.429943	0.475985	0.0556744	0.444986	0.604761	0.00161317	0.181468	0.362608
BnaC05g13670D	106447263	protein phosphatase 2C 7-like] [exception	AT1G17550.2	HAB2	homology to ABI2	K14497	ABA signaling	-0.560193	-0.916704	0.041344	-0.70502	-1.13476	-0.0816679	0.0422514	0.00115114	1	0.0142886	4.5237e-05	0.969845
BnaA06g11830D	106346859	protein phosphatase 2C 7	AT1G17550.2	HAB2	homology to ABI2	K14497	ABA signaling	-0.863379	-0.836393	0.163378	-0.799047	-1.19491	0.23133	0.00019357	0.000631177	0.786594	0.001005	4.48266e-07	0.689578
BnaC08g17440D	106358579	protein phosphatase 2C 7-like	AT1G17550.2	HAB2	homology to ABI2	K14497	ABA signaling	-0.998042	-0.324054	0.242324	-0.670435	-0.326475	0.545351	0.00499464	0.490873	0.796721	0.081885	0.466379	0.43324
BnaAnng23920D	106435732	protein phosphatase 2C 37-like	AT3G11410.1	PP2CA	protein phosphatase 2CA	K14497	ABA signaling	-0.901502	0.120094	1.36678	-1.64337	-0.883795	-0.824523	0.136279	0.909592	0.0943379	0.00719466	0.190188	0.488094
BnaA05g27660D	111215747	protein phosphatase 2C 37-like	AT3G11410.1	PP2CA	protein phosphatase 2CA	K14497	ABA signaling	-0.95083	-0.0738042	0.469371	-0.916564	0.159541	0.377126	0.00508684	0.9059	0.454626	0.00907518	0.747769	0.628625
BnaA01g37370D	106435732	protein phosphatase 2C 37-like	AT3G11410.1	PP2CA	protein phosphatase 2CA	K14497	ABA signaling	-1.4078	-0.0172222	0.850189	-1.70489	-0.406723	0.0537219	6.82131e-06	0.989246	0.0507558	1.11493e-07	0.294923	1
BnaC05g41830D	106452531	protein phosphatase 2C 37	AT3G11410.1	PP2CA	protein phosphatase 2CA	K14497	ABA signaling	-1.67895	-0.174071	0.462476	-1.20389	-0.0474814	0.394906	1.79177e-06	0.749789	0.500267	0.000923999	0.951754	0.630973
BnaA01g20940D	106439642	protein phosphatase 2C 56-like	AT4G26080.1	ABI1	Protein phosphatase 2C family protein	K14497	ABA signaling	0.0795596	0.753126	0.773846	-2.90451	0.239609	0.665228	0.936006	0.383542	0.606489	0.00111765	0.812575	0.69808
BnaA03g47830D	106440872	protein phosphatase 2C 56-like	AT4G26080.1	ABI1	Protein phosphatase 2C family protein	K14497	ABA signaling	-1.42898	-0.851042	0.251977	-1.60408	-1.06208	-0.0916526	6.01898e-07	0.0089933	0.715106	3.53875e-08	0.000589569	0.967977
BnaA01g15250D	106444507	protein phosphatase 2C 56	AT4G26080.1	ABI1	Protein phosphatase 2C family protein	K14497	ABA signaling	-1.54446	-0.919525	0.262633	-1.88354	-1.17199	0.428645	6.67954e-08	0.00381212	0.68845	9.18251e-11	0.000113878	0.463744
BnaC07g40100D	106410455	protein phosphatase 2C 56	AT4G26080.1	ABI1	Protein phosphatase 2C family protein	K14497	ABA signaling	-1.7538	-1.22335	0.130154	-1.73004	-1.24392	0.2253	7.11362e-14	8.636e-07	0.869652	1.40809e-13	3.07334e-07	0.722133
BnaC08g12100D	106429516	protein phosphatase 2C 56-like	AT4G26080.1	ABI1	Protein phosphatase 2C family protein	K14497	ABA signaling	-3.01933	-0.701376	0.107472	-3.12312	-1.16715	0.10595	4.00805e-11	0.147386	0.962128	9.16566e-12	0.0075722	0.975477
BnaC01g18020D	106376079	protein phosphatase 2C 56-like	AT4G26080.1	ABI1	Protein phosphatase 2C family protein	K14497	ABA signaling	-3.56223	-2.61756	0.347874	-3.00299	-2.82595	0.207203	2.56027e-15	8.6411e-09	0.734989	1.75521e-11	5.50353e-10	0.901088
BnaA08g14490D	106361341	protein phosphatase 2C 56-like	AT4G26080.1	ABI1	Protein phosphatase 2C family protein	K14497	ABA signaling	-3.98271	-1.82442	-0.03457	-2.92681	-2.20563	0.50657	1.58041e-07	0.0144652	1	6.12668e-05	0.00250656	0.777639
BnaC09g53650D	106418606	protein phosphatase 2C 77-like	AT5G57050.1	ABI2	Protein phosphatase 2C family protein	K14497	ABA signaling	-0.817206	-0.332785	1.04995	-1.84478	-1.53634	0.190706	0.00437344	0.411739	0.00438487	5.37868e-10	3.39586e-05	0.830473
BnaA10g11080D	106418606	protein phosphatase 2C 77-like	AT5G57050.1	ABI2	Protein phosphatase 2C family protein	K14497	ABA signaling	-1.71481	-1.26194	0.739444	-1.48904	-1.6725	0.568209	2.19507e-08	0.000148617	0.085916	2.26534e-06	2.45964e-07	0.2879
BnaC06g33910D	106406130	protein phosphatase 2C 16-like	AT1G72770.3	HAB1	HYPERSENSITIVE TO ABA1	K14497	ABA signaling	0.866946	0.0649251	0.711932	0.642551	-0.180741	0.197212	0.00320256	0.905078	0.0885278	0.0424207	0.658782	0.823717
BnaA07g30430D	106354239	protein phosphatase 2C 16-like] [exception	AT1G72770.3	HAB1	HYPERSENSITIVE TO ABA1	K14497	ABA signaling	0.712034	0.204793	0.500213	0.661239	0.152855	0.768836	0.00242542	0.521893	0.157931	0.0069018	0.638421	0.0144216
BnaC05g08410D	106357949	serine/threonine-protein kinase SRK2A] [exception	AT1G10940.1	SNRK2.4	Protein kinase superfamily protein	K14498	ABA signaling	0.263048	0.0352243	0.134773	0.226474	0.00307611	-0.0279483	0.205556	0.924593	0.791984	0.325369	1	1
BnaA06g06730D	106368166	serine/threonine-protein kinase SRK2A-like	AT1G10940.1	SNRK2.4	Protein kinase superfamily protein	K14498	ABA signaling	0.192741	1.17374	0.689615	0.106983	1.01226	-1.2554	0.879999	0.293466	0.788125	0.960728	0.350944	0.625479
BnaC08g42270D	106416337	serine/threonine-protein kinase SRK2A-like	AT1G10940.2	SNRK2.4	Protein kinase superfamily protein	K14498	ABA signaling	0.102382	-0.621115	-0.199713	0.228607	-0.454543	-0.121728	0.750735	0.0244495	0.751337	0.46623	0.114059	0.911114
BnaA09g47860D	106420236	serine/threonine-protein kinase SRK2A	AT1G10940.1	SNRK2.4	Protein kinase superfamily protein	K14498	ABA signaling	-0.206459	-1.12464	0.0106822	0.176056	-0.871758	-0.0207191	0.406258	3.8356e-07	1	0.527753	0.0001097	1
BnaA06g06740D	106350115	serine/threonine-protein kinase SRK2A-like	AT1G10940.2	SNRK2.4	Protein kinase superfamily protein	K14498	ABA signaling	-0.319026	-0.475381	-0.113172	0.178196	-0.614431	-0.0705846	0.258518	0.114184	0.912521	0.604141	0.0307662	0.981344
BnaA08g25520D	106362434	serine/threonine-protein kinase SRK2A-like	AT1G10940.1	SNRK2.4	Protein kinase superfamily protein	K14498	ABA signaling	-0.408236	-0.380538	0.390128	-0.62387	-0.448828	0.062866	0.0679697	0.13238	0.288363	0.0049727	0.0595266	0.977319
BnaA01g23120D	106451683	serine/threonine-protein kinase SRK2A	AT1G60940.1	SNRK2.10	SNF1-related protein kinase 2.10	K14498	ABA signaling	-0.212112	0.13124	-0.445107	0.564278	0.452878	0.318427	0.564794	0.784806	0.460853	0.0792814	0.18882	0.712661
BnaC01g28850D	106430398	serine/threonine-protein kinase SRK2A-like	AT1G60940.1	SNRK2.10	SNF1-related protein kinase 2.10	K14498	ABA signaling	-0.472305	-0.683657	0.26122	-0.155706	-0.828041	0.308453	0.0817463	0.0157092	0.670224	0.657219	0.00194565	0.627597
BnaA07g20630D	106353441	serine/threonine-protein kinase SRK2C	AT1G78290.3	SNRK2-8	Protein kinase superfamily protein	K14498	ABA signaling	-0.0945929	-0.501001	0.122436	-0.864812	-0.342953	0.308235	0.951597	0.715649	1	0.453739	0.809552	0.9556
BnaC06g20490D	106381016	serine/threonine-protein kinase SRK2C-like	AT1G78290.3	SNRK2-8	Protein kinase superfamily protein	K14498	ABA signaling	-0.172347	-0.845936	0.24825	-0.264134	-0.779018	0.37114	0.762209	0.0350047	0.733359	0.711179	0.0544028	0.602547
BnaC06g38790D	106353441	serine/threonine-protein kinase SRK2C	AT1G78290.3	SNRK2-8	Protein kinase superfamily protein	K14498	ABA signaling	-1.64106	-2.2816	-0.9319	-0.344812	-1.34976	-0.0121163	0.00776104	0.00602927	0.869761	0.659108	0.0508123	1
BnaA04g13420D	106446459	serine/threonine-protein kinase SRK2J	AT2G23030.1	SNRK2.9	SNF1-related protein kinase 2.9	K14498	ABA signaling	-1.91707	-1.17093	-0.0658605	-2.11488	-0.0962013	0.0642518	0.00144082	0.0939006	1	0.000608539	0.936754	1
BnaC04g35560D	106446459	serine/threonine-protein kinase SRK2J	AT2G23030.1	SNRK2.9	SNF1-related protein kinase 2.9	K14498	ABA signaling	-3.58868	-1.42158	0.345821	-3.32724	-1.83403	-2.14157	2.61183e-19	0.000809569	0.967523	1.16835e-16	8.8693e-06	0.725771
BnaC08g21940D	106412502	uncharacterized protein LOC106412502	AT3G50500.2	SNRK2.2	SNF1-related protein kinase 2.2	K14498	ABA signaling	0.567546	0.588228	0.612588	0.269059	0.648559	0.0936591	0.186334	0.263966	0.339869	0.736106	0.385471	0.988489
BnaA03g40850D	106440004	serine/threonine-protein kinase SRK2D	AT3G50500.1	SNRK2.2	SNF1-related protein kinase 2.2	K14498	ABA signaling	0.538028	0.49915	0.0332657	0.446456	0.229581	-0.185696	0.0166136	0.0503736	1	0.0633172	0.418675	0.813492
BnaC07g12960D	106425658	serine/threonine-protein kinase SRK2D	AT3G50500.2	SNRK2.2	SNF1-related protein kinase 2.2	K14498	ABA signaling	0.165184	0.866606	1.17881	-0.458053	-0.299671	0.399714	0.802452	0.142992	0.127847	0.444751	0.65821	0.774004
BnaC07g31800D	106425658	serine/threonine-protein kinase SRK2D	AT3G50500.1	SNRK2.2	SNF1-related protein kinase 2.2	K14498	ABA signaling	0.0635202	0.592875	0.281402	0.0255962	0.746285	-0.0356824	0.875389	0.0727424	0.760184	0.978929	0.0160513	1
BnaAnng41460D	111214337	serine/threonine-protein kinase SRK2E-like	AT4G33950.2	OST1	Protein kinase superfamily protein	K14498	ABA signaling	-0.702279	-1.78464	0.241865	-0.627007	-1.98547	0.108859	0.137367	0.000120208	0.859813	0.218153	1.41405e-05	0.98704
BnaA01g03110D	106370611	serine/threonine-protein kinase SRK2E	AT4G33950.1	OST1	Protein kinase superfamily protein	K14498	ABA signaling	-1.73275	-2.91283	0.590062	-1.73086	-3.10741	0.0560948	1.73227e-05	4.35708e-13	0.395095	2.20953e-05	1.35778e-14	1
BnaC01g04370D	106438561	serine/threonine-protein kinase SRK2E isoform X1	AT4G33950.1	OST1	Protein kinase superfamily protein	K14498	ABA signaling	-4.33847	-3.86703	1.13947	-3.51085	-4.05122	0.727417	2.53814e-09	9.10596e-08	0.314725	7.06208e-07	1.81152e-08	0.641903
BnaC01g00890D	111215815	serine/threonine-protein kinase SRK2F	AT4G40010.1	SNRK2.7	SNF1-related protein kinase 2.7	K14498	ABA signaling	-2.84169	-2.11212	-2.32413	-2.78183	-2.8441	2.11204	4.40706e-09	3.32427e-05	0.638434	1.2124e-08	1.61145e-08	0.343377
BnaA01g34560D	111215815	serine/threonine-protein kinase SRK2F	AT4G40010.1	SNRK2.7	SNF1-related protein kinase 2.7	K14498	ABA signaling	-3.34362	-2.55391	-0.0262273	-3.61079	-3.41909	-1.04811	5.66342e-12	2.79523e-07	1	2.0693e-13	6.8173e-12	0.623462
BnaAnng26730D	111215815	serine/threonine-protein kinase SRK2F	AT4G40010.1	SNRK2.7	SNF1-related protein kinase 2.7	K14498	ABA signaling	-3.47345	-2.13627	3.10527	-3.57378	-3.3255	0.16671	1.70657e-06	0.00518126	0.44748	1.65673e-06	1.14357e-05	1
BnaC03g03700D	106384950	serine/threonine-protein kinase SRK2G-like	AT5G08590.1	SNRK2.1	SNF1-related protein kinase 2.1	K14498	ABA signaling	0.0887561	0.378088	0.788381	-0.0185667	-0.240852	0.298413	0.928172	0.684897	0.525766	1	0.804426	0.903054
BnaC09g47390D	106419321	serine/threonine-protein kinase SRK2G	AT5G08590.1	SNRK2.1	SNF1-related protein kinase 2.1	K14498	ABA signaling	-0.142937	-0.0364785	0.20543	-0.0660049	-0.117009	0.281049	0.51325	0.91809	0.590019	0.817738	0.649556	0.430277
BnaA10g22850D	106419321	serine/threonine-protein kinase SRK2G	AT5G08590.1	SNRK2.1	SNF1-related protein kinase 2.1	K14498	ABA signaling	-0.255399	-0.173951	0.144127	-0.243895	-0.39118	0.260261	0.267648	0.543168	0.791422	0.344348	0.106558	0.589132
BnaA03g02580D	111210492	serine/threonine-protein kinase SRK2G	AT5G08590.1	SNRK2.1	SNF1-related protein kinase 2.1	K14498	ABA signaling	-0.492366	0.301868	0.380437	-0.463651	-0.148545	0.265902	0.0820149	0.382316	0.429154	0.122134	0.695946	0.683213
BnaC03g50700D	106348245	serine/threonine-protein kinase SRK2H-like	AT5G63650.1	SNRK2.5	SNF1-related protein kinase 2.5	K14498	ABA signaling	-0.258358	0.368011	1.00482	-0.091381	0.181809	0.334664	0.451076	0.321716	0.0162374	0.847619	0.658281	0.672484
BnaA06g22800D	106347932	serine/threonine-protein kinase SRK2H	AT5G63650.1	SNRK2.5	SNF1-related protein kinase 2.5	K14498	ABA signaling	-0.47123	0.506662	1.50459	0.425713	0.44131	0.533068	0.291435	0.31314	0.248063	0.386479	0.383238	0.842362
BnaA07g12290D	106358353	serine/threonine-protein kinase SRK2I isoform X2	AT5G66880.2	SNRK2.3	sucrose nonfermenting 1(SNF1)-related protein kinase 2.3	K14498	ABA signaling	1.12629	0.629497	-0.0798774	0.354756	0.54896	-0.133374	0.000132449	0.076558	0.985392	0.323303	0.118281	0.939997
BnaC07g16480D	106390355	serine/threonine-protein kinase SRK2I	AT5G66880.2	SNRK2.3	sucrose nonfermenting 1(SNF1)-related protein kinase 2.3	K14498	ABA signaling	0.471137	-0.172182	0.0785237	0.13957	-0.0380129	0.0982684	0.0285139	0.557573	0.937984	0.618441	0.927513	0.914889
BnaC06g02640D	106418299	ABSCISIC ACID-INSENSITIVE 5-like protein 7 isoform X2	AT1G49720.3	ABF1	abscisic acid responsive element-binding factor 1	K14432	ABA signaling	0.400855	1.63074	0.311737	0.680984	1.04211	0.666162	0.278787	1.04452e-05	0.820313	0.0582477	0.00534295	0.521491
BnaA06g03040D	111204764	ABSCISIC ACID-INSENSITIVE 5-like protein 7 isoform X1	AT1G49720.3	ABF1	abscisic acid responsive element-binding factor 1	K14432	ABA signaling	-0.195007	1.58379	0.36643	-0.0832115	1.23176	0.136236	0.689647	0.000230158	0.775795	0.9055	0.00659513	0.995654
BnaC06g00420D	106422579	ABSCISIC ACID-INSENSITIVE 5-like protein 5 isoform X1	AT1G45249.7	ABF2	abscisic acid responsive elements-binding factor 2	K14432	ABA signaling	-0.751586	-0.353836	0.0899664	-0.536291	-0.490231	0.382294	0.0278087	0.40668	0.968692	0.155065	0.200908	0.601253
BnaA10g28780D	111198524	ABSCISIC ACID-INSENSITIVE 5-like protein 5 isoform X3	AT1G45249.3	ABF2	abscisic acid responsive elements-binding factor 2	K14432	ABA signaling	-0.763008	-0.686924	0.586853	-0.675023	-0.78128	0.15981	0.0236155	0.0422016	0.235322	0.0569905	0.0152691	0.887208
BnaAnng07530D	106447343	protein ABSCISIC ACID-INSENSITIVE 5-like	AT2G36270.3	ABI5	Basic-leucine zipper (bZIP) transcription factor family protein	K14432	ABA signaling	2.90106	0.42828	-0.0372011	0.568232	1.83596	0.158852	0.000603436	0.755716	1	0.592692	0.0547739	0.986335
BnaC04g09030D	106451127	protein ABSCISIC ACID-INSENSITIVE 5] [exception	AT2G36270.1	ABI5	Basic-leucine zipper (bZIP) transcription factor family protein	K14432	ABA signaling	1.00102	0.134471	1.75126	-0.140044	-0.51276	2.28599	0.0958239	0.903326	0.589109	0.888515	0.511478	0.289411
BnaA05g08020D	106451127	protein ABSCISIC ACID-INSENSITIVE 5] [exception	AT2G36270.1	ABI5	Basic-leucine zipper (bZIP) transcription factor family protein	K14432	ABA signaling	0.915363	0.325931	0.614444	0.229933	0.186885	0.293146	0.00212218	0.43044	0.44767	0.554697	0.668256	0.785607
BnaC04g56840D	106391638	ABSCISIC ACID-INSENSITIVE 5-like protein 3	AT2G41070.3	EEL	Basic-leucine zipper (bZIP) transcription factor family protein	K14432	ABA signaling	0.608842	0.661615	0.0962148	0.162742	0.326746	0.146039	0.0184645	0.0199115	0.949898	0.636726	0.296133	0.889718
BnaA04g23690D	106431112	ABSCISIC ACID-INSENSITIVE 5-like protein 3	AT2G41070.3	EEL	Basic-leucine zipper (bZIP) transcription factor family protein	K14432	ABA signaling	0.0771184	0.794726	-0.240125	-0.139597	0.1388	0.824061	0.897333	0.0888668	0.888584	0.82404	0.826783	0.382218
BnaA09g36130D	106368052	ABSCISIC ACID-INSENSITIVE 5-like protein 2	AT3G56850.1	AREB3	ABA-responsive element binding protein 3	K14432	ABA signaling	1.20765	0.933757	0.891922	0.910175	0.139463	-0.800159	0.051614	0.195219	0.427455	0.182504	0.896961	0.569227
BnaC08g27660D	106368052	ABSCISIC ACID-INSENSITIVE 5-like protein 2	AT3G56850.1	AREB3	ABA-responsive element binding protein 3	K14432	ABA signaling	1.07185	0.741298	0.576459	0.967303	0.91336	-0.380968	0.000471445	0.033053	0.377027	0.00236341	0.00557752	0.683925
BnaC08g27670D	106427483	uncharacterized protein LOC106427483 isoform X2	AT3G56850.1	AREB3	ABA-responsive element binding protein 3	K14432	ABA signaling	1.0185	0.73868	0.358527	0.684548	0.895532	-0.0628637	4.88045e-05	0.00914889	0.517193	0.0109916	0.00092932	0.993477
BnaC04g24820D	106445244	ABSCISIC ACID-INSENSITIVE 5-like protein 2 isoform X1	AT3G56850.1	AREB3	ABA-responsive element binding protein 3	K14432	ABA signaling	-0.408725	0.0846891	0.181841	-0.21456	-0.297296	-0.406385	0.249752	0.883773	0.882385	0.645644	0.510776	0.672425
BnaCnng20400D	106403018	ABSCISIC ACID-INSENSITIVE 5-like protein 2 isoform X1	AT3G56850.1	AREB3	ABA-responsive element binding protein 3	K14432	ABA signaling	-0.860719	-0.81539	1.01361	-0.404903	-1.10546	-1.45943	0.114072	0.200169	0.335479	0.593704	0.115976	0.425931
BnaA06g36330D	106410484	G-box-binding factor 4-like isoform X1	AT5G44080.1		Basic-leucine zipper (bZIP) transcription factor family protein	K14432	ABA signaling	1.66101	0.596325	0.0304786	1.38066	0.656512	-0.0218304	2.30083e-09	0.070888	1	1.06875e-06	0.0361312	1
BnaCnng27030D	106410476	G-box-binding factor 4-like	AT5G44080.1		Basic-leucine zipper (bZIP) transcription factor family protein	K14432	ABA signaling	1.41491	0.325276	0.0264633	0.822537	0.309319	0.170711	3.03631e-11	0.233717	1	0.000262163	0.246055	0.794721
BnaC05g02200D	106397642	G-box-binding factor 4-like	AT1G03970.1	GBF4	G-box binding factor 4	K14432	ABA signaling	1.63345	0.478495	0.907205	1.32922	0.550408	0.614683	3.06052e-06	0.288213	0.230216	0.000328876	0.204362	0.615231
BnaA10g02300D	106370949	G-box-binding factor 4-like	AT1G03970.1	GBF4	G-box binding factor 4	K14432	ABA signaling	-0.759829	-0.67913	0.402441	-1.37831	-0.763488	-0.207327	0.0142164	0.0487639	0.555435	1.93734e-05	0.0276223	0.859205
BnaC07g44670D	106436713	ABSCISIC ACID-INSENSITIVE 5-like protein 6	AT4G34000.1	ABF3	abscisic acid responsive elements-binding factor 3	K14432	ABA signaling	0.646466	-0.241514	1.17801	0.693873	0.171431	1.20077	0.0166979	0.500904	0.000384504	0.012241	0.640842	0.000499759
BnaC01g04330D	106438563	ABSCISIC ACID-INSENSITIVE 5-like protein 6 isoform X1	AT4G34000.1	ABF3	abscisic acid responsive elements-binding factor 3	K14432	ABA signaling	-0.218533	0.165983	0.660247	0.243536	0.282917	0.590496	0.516848	0.693385	0.11937	0.499467	0.433858	0.234674
BnaAnng26550D	106362196	ABSCISIC ACID-INSENSITIVE 5-like protein 6	AT4G34000.1	ABF3	abscisic acid responsive elements-binding factor 3	K14432	ABA signaling	-0.538196	-0.262987	0.74766	-0.246506	-0.0234987	0.952394	0.130067	0.570777	0.133209	0.568414	0.985998	0.048219
BnaC01g43800D	106363379	ABSCISIC ACID-INSENSITIVE 5-like protein 7	AT3G19290.5	ABF4	ABRE binding factor 4	K14432	ABA signaling	0.95009	0.485367	0.254815	0.831396	0.363032	0.377084	0.0010413	0.165373	0.716457	0.00605437	0.309878	0.570277
BnaA01g26200D	106346684	ABSCISIC ACID-INSENSITIVE 5-like protein 7] [exception	AT3G19290.5	ABF4	ABRE binding factor 4	K14432	ABA signaling	0.871523	0.6258	0.721498	1.04182	0.683736	0.356334	0.000364405	0.0221286	0.0432655	0.000119078	0.0165646	0.619037
BnaC05g33570D	111204764	ABSCISIC ACID-INSENSITIVE 5-like protein 7 isoform X1	AT3G19290.5	ABF4	ABRE binding factor 4	K14432	ABA signaling	0.845764	0.0152786	0.337944	0.529675	0.0655317	0.0423256	1.52461e-05	0.978528	0.340287	0.0134489	0.838941	1
BnaA05g20870D	106418299	ABSCISIC ACID-INSENSITIVE 5-like protein 7 isoform X2	AT3G19290.5	ABF4	ABRE binding factor 4	K14432	ABA signaling	0.664273	0.157012	0.26489	0.205555	-0.0354881	0.408704	0.00364599	0.623802	0.570619	0.487605	0.940229	0.330847
BnaC06g02650D	106424466	ABSCISIC ACID-INSENSITIVE 5-like protein 7	AT3G19290.5	ABF4	ABRE binding factor 4	K14432	ABA signaling	0.105314	1.72857	-3.12814	1.12068	-0.229109	0.354871	0.92241	0.245767	0.430825	0.105115	0.928144	1
BnaA03g35190D	106424466	ABSCISIC ACID-INSENSITIVE 5-like protein 7	AT3G19290.5	ABF4	ABRE binding factor 4	K14432	ABA signaling	0.0559248	-0.675851	0.472484	0.553135	-0.565725	0.168488	0.920587	0.125294	0.457607	0.201056	0.236734	0.898704
BnaCnng41320D	106390804	ABSCISIC ACID-INSENSITIVE 5-like protein 7 isoform X1	AT3G19290.5	ABF4	ABRE binding factor 4	K14432	ABA signaling	-0.680112	-0.0811506	0.599816	-0.291593	-0.32468	0.471505	0.0395464	0.884224	0.345452	0.458359	0.41582	0.501524

## Sheet: auxin
ID	KEGG_ID	HitDesc	AGI	symbol	description	KEGG_Ath	pathway	logFC Root_H4h_AV	logFC Root_H24h_AV	logFC Leaf_H24h_AV	logFC Root_H4h_ZS	logFC Root_H24h_ZS	logFC Leaf_H24h_ZS	FDR Root_H4h_AV	FDR Root_H24h_AV	FDR Leaf_H24h_AV	FDR Root_H4h_ZS	FDR Root_H24h_ZS	FDR Leaf_H24h_ZS
BnaA07g00240D	106357568	tyrosine decarboxylase 1-like	AT2G20340.1	AAS	Pyridoxal phosphate (PLP)-dependent transferases superfamily protein	K01593	auxin biosynthesis	-0.705368	-0.356801	-0.0432682	-1.42716	-2.26989	-1.24616	0.295302	0.696169	1	0.101876	0.00648268	0.257034
BnaC09g10380D	106445398	tyrosine decarboxylase 1	AT2G20340.1	AAS	Pyridoxal phosphate (PLP)-dependent transferases superfamily protein	K01593	auxin biosynthesis	-0.812002	-2.48773	-0.42423	1.55606	-1.93329	-0.26609	0.410813	0.0847608	0.681302	0.260255	0.229744	0.864561
BnaA07g00220D	106357570	tyrosine decarboxylase 1-like	AT2G20340.1	AAS	Pyridoxal phosphate (PLP)-dependent transferases superfamily protein	K01593	auxin biosynthesis	-1.63858	-1.20039	-0.368061	-0.186128	-1.38574	-1.16906	0.00502235	0.0685374	0.724063	0.902931	0.14068	0.106649
BnaC07g00580D	106380708	tyrosine decarboxylase 1-like	AT2G20340.1	AAS	Pyridoxal phosphate (PLP)-dependent transferases superfamily protein	K01593	auxin biosynthesis	-1.75734	-1.01846	-0.175567	-1.45885	-1.56219	-0.146723	1.76679e-11	0.00187014	0.767458	3.27874e-08	1.27807e-06	0.845256
BnaC03g60820D	106382592	cytochrome P450 79B1-like	AT4G39950.1	CYP79B2	cytochrome P450, family 79, subfamily B, polypeptide 2	K11812	auxin biosynthesis	-0.583114	-0.854365	0.131469	-1.02126	-1.74965	0.841346	0.744933	0.611288	1	0.530076	0.214938	0.77835
BnaA08g16100D	106426528	cytochrome P450 79B1-like	AT4G39950.1	CYP79B2	cytochrome P450, family 79, subfamily B, polypeptide 2	K11812	auxin biosynthesis	-0.812621	-0.717	0.198222	-0.733473	-1.68005	1.02555	0.48936	0.611462	0.988824	0.553951	0.137763	0.630669
BnaC07g51280D	106410467	cytochrome P450 79B1 isoform X2	AT4G39950.1	CYP79B2	cytochrome P450, family 79, subfamily B, polypeptide 2	K11812	auxin biosynthesis	-2.55373	-0.276652	-0.0414556	-2.64426	-1.65955	1.23117	0.00032968	0.804966	1	0.000292719	0.0318402	0.3501
BnaC01g00800D	106439341	cytochrome P450 79B1	AT4G39950.1	CYP79B2	cytochrome P450, family 79, subfamily B, polypeptide 2	K11812	auxin biosynthesis	-3.89287	-2.74087	0.109945	-2.97118	-4.14944	1.10264	9.6021e-07	0.00106801	1	0.000183069	8.05591e-07	0.465638
BnaA01g34610D	106439341	cytochrome P450 79B1	AT4G39950.1	CYP79B2	cytochrome P450, family 79, subfamily B, polypeptide 2	K11812	auxin biosynthesis	-5.10418	-3.06159	-0.315204	-3.62743	-4.2652	1.18061	8.49331e-08	0.00167999	0.934564	8.66637e-05	1.17033e-05	0.513675
BnaA04g12790D	106446405	tryptophan N-monooxygenase 2	AT2G22330.1	CYP79B3	cytochrome P450, family 79, subfamily B, polypeptide 3	K11813	auxin biosynthesis	-1.48808	-0.45318	0.362155	0.172576	-0.185448	1.33303	0.043585	0.659243	0.882437	0.886179	0.880053	0.305105
BnaAnng37780D	106372416	probable indole-3-pyruvate monooxygenase YUCCA4 isoform X1	AT5G11320.1	YUC4	Flavin-binding monooxygenase family protein	K11816	auxin biosynthesis	-0.220971	0.223411	0.74284	-1.52157	-0.246804	-0.216022	0.695628	0.736451	0.553698	0.000612763	0.674822	0.948648
BnaA09g04510D	106365896	indole-3-pyruvate monooxygenase YUCCA6-like isoform X2	AT5G25620.2	YUC6	Flavin-binding monooxygenase family protein	K11816	auxin biosynthesis	-0.393632	0.247382	0.78215	-0.146015	0.317918	-0.199801	0.316887	0.621232	0.236244	0.780939	0.48171	0.915798
BnaC09g03930D	106440374	indole-3-pyruvate monooxygenase YUCCA6-like	AT5G25620.2	YUC6	Flavin-binding monooxygenase family protein	K11816	auxin biosynthesis	-1.13074	0.303889	-0.364478	-0.739976	0.00253744	-0.0615112	0.0615284	0.724603	0.908705	0.283705	1	1
BnaA02g31890D	106403755	indole-3-pyruvate monooxygenase YUCCA6-like] [frame	AT5G25620.2	YUC6	Flavin-binding monooxygenase family protein	K11816	auxin biosynthesis	-1.53696	-0.0400489	0.353985	-0.617213	-1.02556	0.177145	0.0500589	0.997435	0.697041	0.268256	0.0701499	0.93571
BnaC02g48550D	106403755	indole-3-pyruvate monooxygenase YUCCA6-like] [frame	AT5G25620.2	YUC6	Flavin-binding monooxygenase family protein	K11816	auxin biosynthesis	-2.31683	-0.830169	0.198963	-2.83718	-0.840254	0.189767	4.67375e-10	0.0550953	0.867073	2.81175e-15	0.0328415	0.888638
BnaA06g39380D	106348545	indole-3-pyruvate monooxygenase YUCCA6-like isoform X2	AT5G25620.2	YUC6	Flavin-binding monooxygenase family protein	K11816	auxin biosynthesis	-2.38254	-0.0566545	0.200687	-2.92508	-1.03925	0.388412	8.47803e-06	0.962965	0.93741	2.13648e-07	0.0864009	0.829821
BnaC07g29140D	106407352	indole-3-pyruvate monooxygenase YUCCA6 isoform X1	AT5G25620.2	YUC6	Flavin-binding monooxygenase family protein	K11816	auxin biosynthesis	-4.08236	1.07519	0.261274	-2.64253	-0.853975	0.108882	1.63299e-12	0.0660721	0.895381	6.47917e-07	0.144198	1
BnaAnng12250D	106365401	probable indole-3-pyruvate monooxygenase YUCCA3	AT1G04610.1	YUC3	YUCCA 3	K11816	auxin biosynthesis	1.03618	0.296951	0.306651	1.08968	-0.241897	2.44113	0.0694458	0.721082	0.954449	0.0692047	0.768337	0.632943
BnaC05g49050D	106399876	probable indole-3-pyruvate monooxygenase YUCCA3	AT1G04610.1	YUC3	YUCCA 3	K11816	auxin biosynthesis	-0.0533771	-1.99834	0.0157753	0.16079	-1.8612	-0.0355338	0.952951	0.000657913	1	0.855288	0.00140502	1
BnaA10g02750D	106399876	probable indole-3-pyruvate monooxygenase YUCCA3	AT1G04610.1	YUC3	YUCCA 3	K11816	auxin biosynthesis	-0.272534	-1.56255	2.30079	-0.261894	-1.94607	-0.0402125	0.647236	0.00271565	0.638434	0.706512	0.000157297	1
BnaA01g08170D	106372559	probable indole-3-pyruvate monooxygenase YUCCA8	AT4G28720.1	YUC8	Flavin-binding monooxygenase family protein	K11816	auxin biosynthesis	1.58362	1.2071	3.77688	2.38413	2.14796	-2.18346	3.7e-05	0.0033714	0.262189	1.18796e-09	2.83505e-08	0.725771
BnaC01g09750D	106375577	probable indole-3-pyruvate monooxygenase YUCCA8	AT4G28720.1	YUC8	Flavin-binding monooxygenase family protein	K11816	auxin biosynthesis	-0.248008	0.116419	1.61156	0.291652	0.54176	-0.345144	0.657854	0.882153	0.392121	0.626467	0.318854	0.921444
BnaC08g13170D	106413796	probable indole-3-pyruvate monooxygenase YUCCA8	AT4G28720.1	YUC8	Flavin-binding monooxygenase family protein	K11816	auxin biosynthesis	-1.02888	-1.86399	-0.0271268	-0.729147	-2.17033	-0.0196047	0.0978898	0.00280398	1	0.307485	0.000435322	1
BnaAnng41850D	106359824	probable indole-3-pyruvate monooxygenase YUCCA8	AT4G28720.1	YUC8	Flavin-binding monooxygenase family protein	K11816	auxin biosynthesis	-1.52537	-1.81589	2.28503	0.0873841	-0.575341	-3.00999	0.00318642	0.000685007	0.638434	0.933606	0.35945	0.565517
BnaC05g02320D	106399583	probable indole-3-pyruvate monooxygenase YUCCA9	AT1G04180.1	YUC9	YUCCA 9	K11816	auxin biosynthesis	1.15473	1.55076	0.417146	1.42473	2.55848	1.82475	0.0561389	0.0134401	0.866669	0.0190209	1.14257e-05	0.0824141
BnaA10g02450D	106370091	probable indole-3-pyruvate monooxygenase YUCCA9	AT1G04180.1	YUC9	YUCCA 9	K11816	auxin biosynthesis	0.4385	1.04412	-1.5675	-0.949114	2.18487	0.00639622	0.677721	0.272649	0.435482	0.282631	0.00582604	1
BnaA02g14990D	106395273	L-tryptophan--pyruvate aminotransferase 1	AT1G70560.1	TAA1	tryptophan aminotransferase of Arabidopsis 1	K16903	auxin biosynthesis	0.301593	-0.542478	-0.362168	0.36146	-0.967973	-0.232645	0.347865	0.10068	0.501727	0.279056	0.00103168	0.751058
BnaC06g43720D	111207310	L-tryptophan--pyruvate aminotransferase 1	AT1G70560.1	TAA1	tryptophan aminotransferase of Arabidopsis 1	K16903	auxin biosynthesis	0.194014	-0.500045	-1.75459	-0.297406	-1.31691	0.129483	0.697677	0.297816	0.566428	0.563629	0.00138221	1
BnaC02g19980D	106353777	L-tryptophan--pyruvate aminotransferase 1-like	AT1G70560.1	TAA1	tryptophan aminotransferase of Arabidopsis 1	K16903	auxin biosynthesis	-0.672806	-0.748545	-0.603864	0.01952	-1.12839	-0.105796	0.140416	0.136709	0.43773	1	0.013969	0.986335
BnaC01g16530D	106375778	tryptophan aminotransferase-related protein 2-like	AT4G24670.2	TAR2	tryptophan aminotransferase related 2	K16903	auxin biosynthesis	-2.50044	-1.6348	-0.0352468	-1.51947	-1.04077	0.473281	1.14378e-10	4.83043e-05	1	3.15888e-05	0.0075527	0.563699
BnaA01g14030D	106442204	LOW QUALITY PROTEIN: tryptophan aminotransferase-related protein 2-like] [exception	AT4G24670.2	TAR2	tryptophan aminotransferase related 2	K16903	auxin biosynthesis	-3.04591	-2.75774	-0.463439	-1.0891	-1.27023	-0.201839	6.84352e-11	1.18571e-08	0.638434	0.0748583	0.0319865	0.977198
BnaA03g14120D	106437575	indoleacetaldoxime dehydratase-like	AT2G30770.1	CYP71A13	cytochrome P450 family 71 polypeptide	K11868	auxin biosynthesis	0.0444447	-0.0474241	2.04594	0.0320474	0.0060136	-0.42468	1	1	0.550119	1	1	0.999408
BnaA02g05170D	106425715	indole-3-acetaldehyde oxidase-like	AT5G20960.2	AO1	aldehyde oxidase 1	K11817	auxin biosynthesis	-0.425724	0.757421	1.8321	-0.601582	0.475063	0.799061	0.681128	0.497858	0.195049	0.574369	0.686637	0.725771
BnaAnng33020D	106425715	indole-3-acetaldehyde oxidase-like	AT5G20960.2	AO1	aldehyde oxidase 1	K11817	auxin biosynthesis	-0.653787	0.63278	0.0893974	-0.829264	0.0496835	0.351162	0.536291	0.624254	1	0.453457	0.996236	0.976348
BnaUnng02510D	106425715	indole-3-acetaldehyde oxidase-like	AT5G20960.2	AO1	aldehyde oxidase 1	K11817	auxin biosynthesis	-0.715869	0.66708	0.891682	-0.566523	0.574566	0.36208	0.537681	0.637864	0.746541	0.671302	0.681458	0.981934
BnaC09g36910D	106376414	indole-3-acetaldehyde oxidase	AT5G20960.2	AO1	aldehyde oxidase 1	K11817	auxin biosynthesis	-1.89055	-1.87851	-0.434991	-1.56984	-1.3979	0.162521	2.09303e-08	8.3354e-08	0.51794	4.96704e-06	8.12114e-05	0.904196
BnaA10g14600D	106371701	indole-3-acetaldehyde oxidase-like	AT5G20960.2	AO1	aldehyde oxidase 1	K11817	auxin biosynthesis	-2.25642	-1.34814	-1.41944	-1.92831	-0.671448	0.0476597	0.00264085	0.117427	0.232172	0.0135363	0.472291	1
BnaC03g54410D	106347703	indole-3-acetaldehyde oxidase-like	AT3G43600.1	AAO2	aldehyde oxidase 2	K11817	auxin biosynthesis	2.38821	0.0378599	0.202402	2.25085	-0.0252881	0.638443	6.59367e-12	0.962387	0.84331	1.84359e-10	0.984591	0.29962
BnaA06g19620D	106410244	indole-3-acetaldehyde oxidase-like isoform X1	AT3G43600.1	AAO2	aldehyde oxidase 2	K11817	auxin biosynthesis	1.21811	0.275287	-0.089044	0.943152	-0.328566	0.0922004	2.09939e-05	0.478278	0.959383	0.00165016	0.364993	0.965597
BnaA06g20180D	106347703	indole-3-acetaldehyde oxidase-like	AT3G43600.1	AAO2	aldehyde oxidase 2	K11817	auxin biosynthesis	0.459546	0.877654	0.280534	1.13808	0.157016	0.401253	0.464922	0.18217	0.870697	0.0487473	0.860129	0.785969
BnaC08g46370D	106347703	indole-3-acetaldehyde oxidase-like	AT3G43600.1	AAO2	aldehyde oxidase 2	K11817	auxin biosynthesis	-0.454951	0.350029	0.651686	-1.14688	0.393263	-0.354224	0.695944	0.845016	0.733594	0.253061	0.760099	0.909783
BnaC03g54910D	106425068	nitrilase 2-like	AT3G44300.1	NIT2	nitrilase 2	K01501	auxin biosynthesis	-0.082644	-1.0569	-0.12453	-0.223809	-1.01536	0.415725	0.888728	0.0183202	0.958843	0.689399	0.0212647	0.674866
BnaA06g38980D	106425068	nitrilase 2-like	AT3G44300.1	NIT2	nitrilase 2	K01501	auxin biosynthesis	-0.378227	-0.661001	0.00059409	-0.0291415	-0.553052	0.610167	0.52614	0.296123	1	0.996626	0.382888	0.596025
BnaCnng75490D	106402388	nitrilase 2-like	AT3G44300.1	NIT2	nitrilase 2	K01501	auxin biosynthesis	-1.22529	-2.58785	-0.639363	-1.5682	-2.8855	-0.241187	0.000545413	1.16942e-12	0.579252	1.20717e-05	2.48406e-15	0.909925
BnaC02g07040D	106354428	nitrilase 2-like isoform X2	AT3G44300.1	NIT2	nitrilase 2	K01501	auxin biosynthesis	-1.43539	-2.74571	0.310498	-0.631184	-1.48778	0.571021	0.00696957	8.06357e-07	0.839925	0.30835	0.00858588	0.642161
BnaA03g10890D	106403172	nitrilase 2	AT3G44310.3	NIT1	nitrilase 1	K01501	auxin biosynthesis	2.39483	1.16816	1.52466	-0.0254662	-1.92947	-1.85307	0.0427603	0.42945	0.542633	1	0.199116	0.724001
BnaA01g02310D	106416484	putative amidase C869.01	AT4G34880.1		Amidase family protein	K01426	auxin biosynthesis	1.16271	0.673871	0.00266414	0.305872	0.262919	-0.0125753	0.00549709	0.192726	1	0.611077	0.706679	1
BnaC01g03580D	106416484	putative amidase C869.01	AT4G34880.1		Amidase family protein	K01426	auxin biosynthesis	0.737044	0.261083	-0.0424341	0.506078	0.12693	0.029583	0.368477	0.833481	1	0.576158	0.926444	1
BnaA01g02320D	106400862	putative amidase C869.01	AT4G34880.2		Amidase family protein	K01426	auxin biosynthesis	0.639677	0.556252	0.053192	0.424354	0.293102	0.2841	0.0129572	0.0564155	0.997491	0.158727	0.389121	0.701433
BnaA02g25400D	106400862	putative amidase C869.01	AT4G34880.2		Amidase family protein	K01426	auxin biosynthesis	-0.760154	-1.86094	2.0403	-0.877552	-1.39351	-0.543548	0.467863	0.0870415	0.337389	0.426627	0.19243	0.922187
BnaC02g46880D	106416484	putative amidase C869.01	AT4G34880.2		Amidase family protein	K01426	auxin biosynthesis	-1.41844	-2.11475	0.517958	-1.6203	-2.15277	-0.298942	0.00167335	1.04859e-05	0.565462	0.00039842	5.37711e-06	0.823865
BnaA09g48610D	106420154	amidase 1	AT1G08980.1	AMI1	amidase 1	K01426	auxin biosynthesis	3.33898	1.62065	0.27938	0.663327	-0.324378	-0.210655	4.46632e-12	0.00322424	0.836802	0.306081	0.729857	0.916301
BnaC08g42870D	106377010	amidase 1 isoform X1	AT1G08980.1	AMI1	amidase 1	K01426	auxin biosynthesis	-0.14164	2.25572	0.151743	2.23709	1.6482	0.203579	0.911395	0.0119358	0.950665	0.0284235	0.0726024	0.919212
BnaC04g45700D	106406602	auxin transporter protein 1	AT2G38120.1	AUX1	Transmembrane amino acid transporter family protein	K13946	auxin signaling	0.558457	-0.582761	0.256027	0.106601	-0.468183	-0.0570651	0.0359295	0.0479702	0.673461	0.783544	0.116899	1
BnaA03g17600D	106427771	auxin transporter protein 1-like	AT2G38120.1	AUX1	Transmembrane amino acid transporter family protein	K13946	auxin signaling	-0.819283	-0.794547	-0.735217	-2.25064	-2.40187	-0.23199	0.335689	0.427564	0.670052	0.0353793	0.00996613	0.983024
BnaA05g06540D	106429352	auxin transporter protein 1	AT2G38120.1	AUX1	Transmembrane amino acid transporter family protein	K13946	auxin signaling	-1.16795	-0.252929	-0.00279354	-1.29703	-0.444771	-0.233669	4.10891e-06	0.4658	1	4.62731e-07	0.138418	0.729983
BnaA04g21830D	106406649	auxin transporter protein 1-like	AT2G38120.1	AUX1	Transmembrane amino acid transporter family protein	K13946	auxin signaling	-1.20005	-0.715523	0.401538	-1.11055	-0.681985	-0.453142	0.00406179	0.145262	0.676932	0.010341	0.155347	0.658847
BnaC04g07210D	106429352	auxin transporter protein 1	AT2G38120.1	AUX1	Transmembrane amino acid transporter family protein	K13946	auxin signaling	-1.24907	-0.528819	0.0991844	-1.20824	-0.585948	-0.230124	1.68753e-06	0.0877951	0.935009	5.8531e-06	0.0477795	0.742704
BnaAnng30780D	106420715	auxin transporter-like protein 1	AT2G38120.1	AUX1	Transmembrane amino acid transporter family protein	K13946	auxin signaling	-1.62752	-1.93652	0.309285	-1.39135	-1.52687	0.261982	0.00100727	0.000352431	0.873489	0.00746745	0.00586974	0.923238
BnaC03g21070D	106427771	auxin transporter protein 1-like	AT2G38120.1	AUX1	Transmembrane amino acid transporter family protein	K13946	auxin signaling	-1.91035	-0.94126	-0.70072	-1.31716	-1.20246	-0.0637398	0.00126988	0.178836	0.547002	0.0356631	0.0657575	1
BnaA03g18790D	106420715	auxin transporter-like protein 1	AT2G38120.1	AUX1	Transmembrane amino acid transporter family protein	K13946	auxin signaling	-2.711	-1.93287	0.170161	-1.85496	-1.33487	-0.448788	1.36779e-05	0.00501918	0.984424	0.00129646	0.0301058	0.854628
BnaA07g20880D	106353473	auxin transporter-like protein 3	AT1G77690.1	LAX3	like AUX1 3	K13946	auxin signaling	-1.56269	0.294482	0.237654	-0.97021	0.535213	-0.446004	5.63285e-06	0.539923	0.872454	0.00788131	0.192277	0.682336
BnaC06g20740D	106368944	auxin transporter-like protein 3 isoform X1	AT1G77690.1	LAX3	like AUX1 3	K13946	auxin signaling	-2.20751	-0.126753	0.0619944	-1.47294	0.371955	-0.537181	1.97649e-12	0.806672	1	3.95911e-06	0.346672	0.506412
BnaCnng11320D	106397731	auxin transporter-like protein 3	AT1G77690.1	LAX3	like AUX1 3	K13946	auxin signaling	-2.49506	-0.399938	-1.27244	-2.23877	-1.19253	-2.16027	1.14952e-08	0.496763	0.112366	7.93542e-07	0.0134426	0.0140307
BnaA02g18200D	106397731	auxin transporter-like protein 3	AT1G77690.1	LAX3	like AUX1 3	K13946	auxin signaling	-2.50462	-0.220046	-1.12192	-2.22142	-0.2877	-0.774077	2.19207e-16	0.618672	0.0128197	3.32034e-13	0.468276	0.154369
BnaCnng74340D	106368803	auxin transporter-like protein 2	AT2G21050.1	LAX2	like AUXIN RESISTANT 2	K13946	auxin signaling	2.10528	-0.573418	-0.342462	2.03407	-0.266047	0.0495924	6.20028e-09	0.219533	0.720489	3.18988e-08	0.609181	1
BnaA03g23150D	106368803	auxin transporter-like protein 2	AT2G21050.1	LAX2	like AUXIN RESISTANT 2	K13946	auxin signaling	1.63465	-0.767724	0.681337	1.76742	-0.554209	-0.182094	1.06258e-07	0.0362116	0.214384	1.53663e-08	0.14342	0.879626
BnaA09g43460D	106368803	auxin transporter-like protein 2	AT2G21050.1	LAX2	like AUXIN RESISTANT 2	K13946	auxin signaling	-0.35259	-0.899102	1.20243	-0.280266	-1.06585	-0.446928	0.537191	0.120075	0.146775	0.66946	0.0527763	0.78879
BnaC08g36050D	106415548	auxin transporter-like protein 2	AT2G21050.1	LAX2	like AUXIN RESISTANT 2	K13946	auxin signaling	-1.11464	-1.66524	2.24939	-1.03958	-1.42936	0.0224789	0.00494738	0.000107428	3.65905e-05	0.0112833	0.000827181	1
BnaCnng03900D	106435878	auxin transporter-like protein 1 isoform X2	AT5G01240.2	LAX1	like AUXIN RESISTANT 1	K13946	auxin signaling	3.87347	0.84231	1.44231	3.25703	-0.956176	-1.16791	0.000303496	0.537488	0.429144	0.00548547	0.489377	0.613657
BnaA10g27610D	106435168	auxin transporter-like protein 1	AT5G01240.1	LAX1	like AUXIN RESISTANT 1	K13946	auxin signaling	3.70706	1.82087	0.52484	3.7063	1.6318	0.703041	8.3191e-08	0.0159429	0.734458	8.61146e-08	0.0244235	0.641479
BnaA09g50600D	106369249	auxin-responsive protein IAA3-like	AT1G04240.1	SHY2	AUX/IAA transcriptional regulator family protein	K14484	auxin signaling	-1.94435	-1.08288	0.373894	-1.31997	-1.74489	-0.171392	1.51048e-05	0.0364084	0.726784	0.0058596	0.000486118	0.94361
BnaC08g43820D	106406084	auxin-responsive protein IAA3-like	AT1G04240.1	SHY2	AUX/IAA transcriptional regulator family protein	K14484	auxin signaling	-2.28233	-1.5708	-0.150937	-1.1315	-1.69562	-0.490607	2.88489e-06	0.00302688	0.959382	0.0360889	0.00181336	0.708779
BnaC05g02360D	106399474	auxin-responsive protein IAA3	AT1G04240.1	SHY2	AUX/IAA transcriptional regulator family protein	K14484	auxin signaling	-2.48222	-4.32708	-0.137849	-1.18316	-3.34881	-0.215257	2.02545e-05	3.47679e-13	0.940162	0.0351833	2.15037e-07	0.874983
BnaA10g02490D	106370085	auxin-responsive protein IAA3	AT1G04240.1	SHY2	AUX/IAA transcriptional regulator family protein	K14484	auxin signaling	-2.69405	-2.69236	0.395373	-1.01662	-2.34542	-0.167117	2.68748e-08	6.25185e-08	0.706833	0.0464058	1.70956e-06	0.948725
BnaCnng41350D	111200408	auxin-responsive protein IAA17	AT1G04250.1	AXR3	AUX/IAA transcriptional regulator family protein	K14484	auxin signaling	-0.411604	-1.20003	-0.00564063	-2.46551	-1.78438	-0.186721	0.583351	0.0986667	1	0.0195136	0.10775	0.978169
BnaA09g50590D	106369247	auxin-responsive protein IAA17	AT1G04250.1	AXR3	AUX/IAA transcriptional regulator family protein	K14484	auxin signaling	-0.477358	-0.973836	0.0860482	-0.467043	-0.856873	0.250777	0.0672686	0.000195294	0.941719	0.087329	0.000926459	0.675368
BnaA10g02500D	106370934	auxin-responsive protein IAA17	AT1G04250.1	AXR3	AUX/IAA transcriptional regulator family protein	K14484	auxin signaling	-0.945447	-1.79415	0.32255	-0.722765	-1.58077	0.232476	0.00030224	1.24311e-11	0.525915	0.00867365	2.03904e-09	0.725771
BnaA08g27770D	111200408	auxin-responsive protein IAA17	AT1G04250.1	AXR3	AUX/IAA transcriptional regulator family protein	K14484	auxin signaling	-0.975085	-1.2629	-0.364057	-0.965784	-1.59095	-0.196833	0.00154745	7.78453e-05	0.526743	0.00306561	6.46825e-07	0.824288
BnaC08g43830D	106406731	auxin-responsive protein IAA17-like	AT1G04250.1	AXR3	AUX/IAA transcriptional regulator family protein	K14484	auxin signaling	-1.0911	-1.06352	0.395549	-0.726773	-1.06504	0.428113	0.00306896	0.00806807	0.614228	0.0833253	0.00862429	0.621204
BnaC05g02370D	106397047	auxin-responsive protein IAA17	AT1G04250.1	AXR3	AUX/IAA transcriptional regulator family protein	K14484	auxin signaling	-1.39815	-1.62884	-0.223633	-1.13471	-1.6009	0.322762	3.24277e-05	2.92538e-06	0.798532	0.00113183	3.62043e-06	0.698257
BnaC05g02660D	106399391	auxin-responsive protein IAA12-like isoform X2	AT1G04550.2	IAA12	AUX/IAA transcriptional regulator family protein	K14484	auxin signaling	0.244988	0.728627	-0.411738	-0.00391699	-0.268017	-0.0875109	0.550593	0.0555977	0.648692	1	0.550694	0.996617
BnaAnng12210D	106399391	auxin-responsive protein IAA12-like isoform X2	AT1G04550.2	IAA12	AUX/IAA transcriptional regulator family protein	K14484	auxin signaling	-0.537176	-0.0913762	-0.612199	-0.632575	-0.396711	-0.349078	0.101718	0.867053	0.4124	0.0757084	0.323587	0.78554
BnaA10g02680D	106399391	auxin-responsive protein IAA12-like isoform X1	AT1G04550.2	IAA12	AUX/IAA transcriptional regulator family protein	K14484	auxin signaling	-1.12938	-0.520446	0.425487	-1.01659	-0.393958	-0.167887	0.0209092	0.394946	0.79413	0.0438644	0.513278	0.969308
BnaC08g50150D	106399391	auxin-responsive protein IAA12-like isoform X2	AT1G04550.2	IAA12	AUX/IAA transcriptional regulator family protein	K14484	auxin signaling	-1.56179	-0.71428	-0.139353	-1.15655	-0.307113	-0.501257	4.61437e-06	0.0751267	0.9558	0.00148431	0.50615	0.598034
BnaA08g01770D	106360482	auxin-responsive protein IAA18-like	AT1G51950.1	IAA18	indole-3-acetic acid inducible 18	K14484	auxin signaling	1.52495	0.393082	0.505249	1.14851	0.841954	0.367418	1.5061e-11	0.172906	0.157023	9.48333e-07	0.000542616	0.420765
BnaC06g05090D	106403322	auxin-responsive protein IAA18	AT1G51950.1	IAA18	indole-3-acetic acid inducible 18	K14484	auxin signaling	1.16935	-0.127796	0.410521	0.475747	-0.827956	0.611701	5.39172e-05	0.796657	0.450916	0.162765	0.0109813	0.212614
BnaC03g78000D	106427431	auxin-responsive protein IAA18-like	AT1G51950.1	IAA18	indole-3-acetic acid inducible 18	K14484	auxin signaling	1.10935	0.538929	0.747194	0.152183	-0.581315	-0.249358	0.0158577	0.358633	0.344243	0.841665	0.329179	0.901734
BnaA06g02010D	106346047	auxin-responsive protein IAA18	AT1G51950.1	IAA18	indole-3-acetic acid inducible 18	K14484	auxin signaling	0.801944	-0.238104	0.275392	0.684763	-0.420039	0.360133	0.000481406	0.449466	0.554889	0.00434131	0.118293	0.420656
BnaC06g09250D	106427431	auxin-responsive protein IAA18-like	AT1G51950.1	IAA18	indole-3-acetic acid inducible 18	K14484	auxin signaling	-0.254678	-1.64066	-0.177763	-0.682818	-0.374454	0.0237842	0.69999	0.00514899	0.960799	0.20341	0.558528	1
BnaA01g28670D	106380745	auxin-responsive protein IAA19-like isoform X1	AT3G15540.1	IAA19	indole-3-acetic acid inducible 19	K14484	auxin signaling	-0.0379813	-0.801004	0.395026	0.245637	-1.4535	-0.0483748	0.966069	0.1609	0.731197	0.708118	0.00368879	1
BnaA03g33930D	106444036	auxin-responsive protein IAA19	AT3G15540.1	IAA19	indole-3-acetic acid inducible 19	K14484	auxin signaling	-0.385459	-1.5755	0.240662	-0.00189632	-1.23125	-0.540981	0.664086	0.0455526	0.925435	1	0.087589	0.725771
BnaC03g39170D	106406807	auxin-responsive protein IAA19	AT3G15540.1	IAA19	indole-3-acetic acid inducible 19	K14484	auxin signaling	-0.735311	-1.89806	0.632918	-0.175293	-1.8008	-0.125069	0.0978898	1.00815e-05	0.311079	0.778265	1.83604e-05	0.959571
BnaCnng74250D	106399276	auxin-responsive protein IAA19-like	AT3G15540.1	IAA19	indole-3-acetic acid inducible 19	K14484	auxin signaling	-1.25753	-0.931003	0.252954	-0.75403	-0.334469	-0.29737	0.0188673	0.121986	0.832327	0.212516	0.641101	0.809637
BnaC01g36030D	106417632	auxin-responsive protein IAA19-like isoform X1	AT3G15540.1	IAA19	indole-3-acetic acid inducible 19	K14484	auxin signaling	-4.72832	-4.05679	-0.638432	4.23081	-4.42763	-7.53107	0.095362	0.241937	0.978584	0.10355	0.23124	0.224456
BnaC07g16810D	106453499	auxin-responsive protein IAA7 isoform X1	AT3G23050.1	IAA7	indole-3-acetic acid 7	K14484	auxin signaling	0.49941	-0.261626	0.486472	0.51719	1.9527	0.503156	0.700226	0.86961	0.443389	0.370214	3.29111e-06	0.463448
BnaC01g43640D	106453499	auxin-responsive protein IAA7 isoform X1	AT3G23050.1	IAA7	indole-3-acetic acid 7	K14484	auxin signaling	0.49941	-0.261625	0.486472	0.51719	1.9527	0.503156	0.700226	0.86961	0.443389	0.370214	3.29111e-06	0.463448
BnaC05g29300D	106367506	auxin-responsive protein IAA7-like	AT3G23050.1	IAA7	indole-3-acetic acid 7	K14484	auxin signaling	0.0199404	-1.25427	0.0179569	-0.109461	-1.55448	0.199681	0.965827	1.47563e-06	1	0.77275	1.32829e-09	0.7596
BnaA05g16680D	106451788	auxin-responsive protein IAA7	AT3G23050.1	IAA7	indole-3-acetic acid 7	K14484	auxin signaling	-0.258182	-1.42265	-1.41335	-1.08	-1.6843	-0.0243914	0.732922	0.033053	0.106831	0.119488	0.0130518	1
BnaA03g36950D	106439612	auxin-responsive protein IAA7	AT3G23050.1	IAA7	indole-3-acetic acid 7	K14484	auxin signaling	-0.598859	-1.01281	0.221945	-0.648113	-1.90666	0.279771	0.213976	0.0412213	0.886887	0.202676	3.26076e-05	0.850177
BnaA06g27950D	106352114	auxin-responsive protein IAA28	AT5G25890.1	IAA28	indole-3-acetic acid inducible 28	K14484	auxin signaling	1.33917	0.0552171	1.70915	0.245161	-0.00411866	0.844099	0.00637054	0.962427	0.173496	0.685703	1	0.434274
BnaA09g04430D	106364021	auxin-responsive protein IAA28-like	AT5G25890.1	IAA28	indole-3-acetic acid inducible 28	K14484	auxin signaling	-0.0777666	-0.190535	1.31932	0.808917	0.720454	-0.221102	0.870725	0.715052	0.514383	0.0492072	0.139064	1
BnaC07g28990D	106352191	auxin-responsive protein IAA28 isoform X2	AT5G25890.1	IAA28	indole-3-acetic acid inducible 28	K14484	auxin signaling	-0.308063	-0.298361	0.827404	-0.35434	-0.640128	0.323973	0.277454	0.360344	0.0510004	0.226148	0.017494	0.656384
BnaC09g03870D	106444457	auxin-responsive protein IAA28	AT5G25890.1	IAA28	indole-3-acetic acid inducible 28	K14484	auxin signaling	-0.563256	-0.0606592	0.25043	0.493592	0.11372	-0.608487	0.300556	0.955632	0.946753	0.337366	0.879158	0.824321
BnaA01g33420D	106433425	auxin-responsive protein IAA16-like isoform X1	AT3G04730.1	IAA16	indoleacetic acid-induced protein 16	K14484	auxin signaling	0.591149	-0.707896	0.63842	0.325108	-0.530216	1.61079	0.222094	0.185537	0.450601	0.570002	0.330925	0.00913208
BnaC01g39910D	111212783	auxin-responsive protein IAA16-like	AT3G04730.1	IAA16	indoleacetic acid-induced protein 16	K14484	auxin signaling	0.368659	-0.917892	2.18328	1.14014	-0.839955	-2.36326	0.80279	0.546759	0.300797	0.400426	0.577293	0.275582
BnaAnng10570D	106453092	auxin-responsive protein IAA16	AT3G04730.1	IAA16	indoleacetic acid-induced protein 16	K14484	auxin signaling	0.077965	-0.270047	0.554347	0.321532	0.0641755	0.525326	0.821141	0.41877	0.149406	0.283743	0.885206	0.229836
BnaC05g47100D	106427417	auxin-responsive protein IAA16	AT3G04730.1	IAA16	indoleacetic acid-induced protein 16	K14484	auxin signaling	-0.146546	-0.282377	0.668695	-0.078209	-0.244504	0.465628	0.681995	0.453322	0.107813	0.869107	0.509303	0.400618
BnaCnng09720D	106415765	auxin-responsive protein IAA9-like	AT5G65670.1	IAA9	indole-3-acetic acid inducible 9	K14484	auxin signaling	0.327437	0.697716	0.15598	-1.68969	2.76187	-2.12682	0.326933	0.0345531	0.870797	0.418729	0.0335347	0.725771
BnaA06g24570D	106347820	auxin-responsive protein IAA9-like isoform X1	AT5G65670.1	IAA9	indole-3-acetic acid inducible 9	K14484	auxin signaling	0.122462	0.124126	0.39014	0.0457258	0.122726	0.0331736	0.657322	0.710348	0.301969	0.910812	0.699634	1
BnaC02g47310D	106415765	auxin-responsive protein IAA9-like	AT5G65670.1	IAA9	indole-3-acetic acid inducible 9	K14484	auxin signaling	-0.21313	-0.0796243	0.279515	1.63906	-1.38397	-7.47737	0.913967	0.985551	0.991053	0.421945	0.474315	0.0202936
BnaA09g07160D	106441245	auxin-responsive protein IAA9	AT5G65670.1	IAA9	indole-3-acetic acid inducible 9	K14484	auxin signaling	-0.261015	0.419898	0.018752	-0.251969	0.116727	0.223031	0.275129	0.092585	1	0.326731	0.706139	0.688012
BnaC01g43610D	106415765	auxin-responsive protein IAA9-like	AT5G65670.1	IAA9	indole-3-acetic acid inducible 9	K14484	auxin signaling	-0.3891	-0.692616	-0.106511	0.923002	-5.01299	-5.58322	0.805597	0.692983	1	0.711798	0.0167628	0.113814
BnaCnng13150D	106348109	auxin-responsive protein IAA9	AT5G65670.1	IAA9	indole-3-acetic acid inducible 9	K14484	auxin signaling	-0.479708	-0.129178	-0.00790874	-0.227923	-0.174858	0.0115611	0.0138263	0.642208	1	0.320613	0.480933	1
BnaCnng57860D	106415790	auxin-responsive protein IAA9 isoform X1	AT5G65670.1	IAA9	indole-3-acetic acid inducible 9	K14484	auxin signaling	-0.558056	-0.0925424	-0.0244613	-0.410022	-0.332149	-0.0286183	0.00800491	0.779896	1	0.0717839	0.173697	1
BnaC09g21260D	106453684	uncharacterized protein LOC106453684	AT5G65670.1	IAA9	indole-3-acetic acid inducible 9	K14484	auxin signaling	-0.578132	0.359872	0.24536	0.544922	-6.09845	-2.00684	0.771111	0.893182	1	0.867646	0.0101956	0.616327
BnaA08g05350D	106359562	auxin-responsive protein IAA14-like	AT4G14550.1	IAA14	indole-3-acetic acid inducible 14	K14484	auxin signaling	-0.271743	0.175823	0.206458	0.196112	1.35597	-0.299344	0.526152	0.751706	0.860212	0.70055	0.000320025	0.783027
BnaC08g47390D	106413947	auxin-responsive protein IAA14-like	AT4G14550.1	IAA14	indole-3-acetic acid inducible 14	K14484	auxin signaling	-0.381633	-0.135224	0.571793	0.185065	0.696098	0.255752	0.390953	0.833339	0.472808	0.740288	0.115969	0.837278
BnaCnng63870D	106366639	auxin-responsive protein IAA4	AT5G43700.1	ATAUX2-11	AUX/IAA transcriptional regulator family protein	K14484	auxin signaling	-0.0445509	-0.679851	0.16861	-0.156627	-0.955798	-0.00458045	0.88993	0.00432988	0.761851	0.588431	2.29132e-05	1
BnaA09g16590D	111200984	auxin-responsive protein IAA4	AT5G43700.1	ATAUX2-11	AUX/IAA transcriptional regulator family protein	K14484	auxin signaling	-1.29285	-0.370295	0.855373	-0.754121	-1.33024	-0.21772	0.00103507	0.487879	0.160724	0.0817132	0.00152001	0.873607
BnaC05g36730D	106452119	auxin-responsive protein IAA26	AT3G16500.1	PAP1	phytochrome-associated protein 1	K14484	auxin signaling	0.555635	0.272916	-0.263593	0.324104	0.240365	0.291296	0.0546351	0.478631	0.683432	0.332762	0.526351	0.681644
BnaC01g44160D	106428894	auxin-responsive protein IAA26-like	AT3G16500.1	PAP1	phytochrome-associated protein 1	K14484	auxin signaling	0.0851678	0.886046	-0.152977	0.320556	0.693125	0.550962	0.81944	0.0027086	0.886131	0.329144	0.019854	0.321449
BnaA01g27770D	106428894	auxin-responsive protein IAA26-like	AT3G16500.1	PAP1	phytochrome-associated protein 1	K14484	auxin signaling	0.0638357	0.442506	0.128857	0.367302	0.819081	0.478185	0.87819	0.209401	0.927799	0.283335	0.0086195	0.505529
BnaC03g39670D	106358145	auxin-responsive protein IAA26	AT3G16500.1	PAP1	phytochrome-associated protein 1	K14484	auxin signaling	-0.842341	-0.532981	0.328559	-1.53337	-0.531463	0.111476	0.000349928	0.0541313	0.515665	6.88278e-11	0.0489951	0.923699
BnaA05g23300D	106452205	auxin-responsive protein IAA26 isoform X1	AT3G16500.1	PAP1	phytochrome-associated protein 1	K14484	auxin signaling	-0.929748	-0.859092	0.266932	-0.430479	-0.867984	0.282969	0.000398066	0.00338682	0.640297	0.146753	0.00239874	0.667938
BnaA03g34220D	106439439	auxin-responsive protein IAA26 isoform X2	AT3G16500.1	PAP1	phytochrome-associated protein 1	K14484	auxin signaling	-1.31373	-0.215818	0.0184855	-1.47591	-0.428305	0.141884	5.09652e-09	0.487519	1	6.86087e-11	0.103722	0.861537
BnaC01g09350D	106375512	auxin-responsive protein IAA27-like	AT4G29080.1	PAP2	phytochrome-associated protein 2	K14484	auxin signaling	-1.07804	-1.23834	0.521224	-0.803017	-1.5737	-0.360898	0.000382365	0.000100981	0.331902	0.0128203	4.31556e-07	0.628907
BnaA01g07810D	106441059	auxin-responsive protein IAA27-like	AT4G29080.1	PAP2	phytochrome-associated protein 2	K14484	auxin signaling	-1.16881	-0.938219	1.13526	-1.25521	-1.4095	-0.727856	0.000222536	0.00738285	0.0116225	0.000152594	6.85139e-05	0.26502
BnaC04g35180D	106392106	auxin-responsive protein IAA8-like	AT2G22670.3	IAA8	indoleacetic acid-induced protein 8	K14484	auxin signaling	0.157146	-0.116377	-0.00665177	-0.0785483	-0.61813	-0.46329	0.577183	0.747934	1	0.830516	0.0147014	0.267213
BnaA04g13090D	106446437	auxin-responsive protein IAA8	AT2G22670.3	IAA8	indoleacetic acid-induced protein 8	K14484	auxin signaling	-1.69574	-0.812604	-0.346917	-1.60783	-1.00406	0.0509956	4.42892e-07	0.0378603	0.638434	1.54018e-06	0.00525207	1
BnaA07g35660D	106449503	auxin-responsive protein IAA15	AT1G80390.1	IAA15	indole-3-acetic acid inducible 15	K14484	auxin signaling	3.31898	2.59261	2.32517	3.16138	2.35026	-0.688267	0.00672012	0.054269	0.347572	0.0122965	0.0576606	0.92563
BnaC06g40600D	106449503	auxin-responsive protein IAA15	AT1G80390.1	IAA15	indole-3-acetic acid inducible 15	K14484	auxin signaling	3.25362	1.63107	-0.0402619	0.693891	0.768305	-0.368059	0.000254495	0.029313	1	0.46029	0.330699	0.998916
BnaA05g16700D	106451786	auxin-responsive protein IAA2-like isoform X1	AT3G23030.1	IAA2	indole-3-acetic acid inducible 2	K14484	auxin signaling	1.0789	-1.58959	-1.58701	0.394952	-0.894604	0.480632	0.331205	0.187124	0.392611	0.796256	0.501973	0.904196
BnaC05g29330D	106367504	auxin-responsive protein IAA2 isoform X1	AT3G23030.1	IAA2	indole-3-acetic acid inducible 2	K14484	auxin signaling	0.941525	0.0797423	0.934197	0.238825	-0.192685	0.309026	0.00068345	0.871153	0.0092473	0.498304	0.618278	0.637465
BnaA01g24190D	106453688	auxin-responsive protein IAA2-like isoform X1	AT3G23030.1	IAA2	indole-3-acetic acid inducible 2	K14484	auxin signaling	0.700203	-0.402437	0.39742	0.340359	-0.266355	0.0799021	0.0327169	0.317603	0.52163	0.384803	0.525658	0.98532
BnaC03g43130D	106416441	auxin-responsive protein IAA2	AT3G23030.1	IAA2	indole-3-acetic acid inducible 2	K14484	auxin signaling	0.487208	0.630441	-0.291382	0.584492	1.13513	-3.33513	0.336485	0.311913	1	0.264095	0.0254522	0.470582
BnaC01g31190D	106453524	auxin-responsive protein IAA2-like	AT3G23030.1	IAA2	indole-3-acetic acid inducible 2	K14484	auxin signaling	0.42286	-0.899892	-0.0481947	0.0597465	-0.564538	0.17292	0.243012	0.0132083	1	0.92762	0.143254	0.878754
BnaA03g36940D	106439613	auxin-responsive protein IAA2-like	AT3G23030.1	IAA2	indole-3-acetic acid inducible 2	K14484	auxin signaling	0.414725	-0.0999705	0.604696	0.295377	-0.0269736	-0.18517	0.129425	0.812301	0.196391	0.337088	0.967412	0.8442
BnaC03g43120D	106416441	auxin-responsive protein IAA2	AT3G23030.1	IAA2	indole-3-acetic acid inducible 2	K14484	auxin signaling	0.0931613	0.332454	0.794251	-0.198634	-0.379515	0.595078	0.881893	0.585224	0.2718	0.75279	0.50061	0.521023
BnaC08g09640D	106413733	auxin-responsive protein IAA1	AT4G14560.1	IAA1	indole-3-acetic acid inducible	K14484	auxin signaling	0.58878	-2.27106	-0.163439	0.564525	-1.37067	-0.0842539	0.232151	2.64326e-06	0.907504	0.311282	0.00430222	0.99578
BnaA08g30190D	106413733	auxin-responsive protein IAA1	AT4G14560.1	IAA1	indole-3-acetic acid inducible	K14484	auxin signaling	-0.230817	-3.33834	0.61773	-0.385284	-1.92079	0.68313	0.873621	0.00507221	0.765423	0.806872	0.113886	0.774371
BnaA04g26850D	106454444	auxin-responsive protein IAA20	AT2G46990.1	IAA20	indole-3-acetic acid inducible 20	K14484	auxin signaling	-3.08963	-2.00284	-0.958612	-1.79241	-0.764022	-0.350191	0.00785277	0.0671581	0.741784	0.0969892	0.528933	0.965846
BnaC07g41460D	106407193	auxin-responsive protein IAA11-like isoform X1	AT4G28640.2	IAA11	indole-3-acetic acid inducible 11	K14484	auxin signaling	0.639685	-0.151324	-0.37062	0.573025	0.201461	-0.132905	0.0183171	0.728415	0.345655	0.0657063	0.63426	0.863347
BnaA01g08280D	106355940	auxin-responsive protein IAA11	AT4G28640.1	IAA11	indole-3-acetic acid inducible 11	K14484	auxin signaling	0.595214	-0.564125	-0.367372	0.919514	0.0857153	0.434563	0.0151109	0.0411532	0.450849	0.000122301	0.821932	0.366385
BnaC01g09830D	106355940	auxin-responsive protein IAA11	AT4G28640.3	IAA11	indole-3-acetic acid inducible 11	K14484	auxin signaling	0.588224	-0.359822	-0.10026	0.510121	-0.444859	0.522364	0.0762008	0.383591	0.958522	0.151721	0.245607	0.410513
BnaA03g58910D	106386093	auxin-responsive protein IAA11-like	AT4G28640.1	IAA11	indole-3-acetic acid inducible 11	K14484	auxin signaling	0.0272963	-0.737775	0.343136	0.0746092	-0.425542	0.789567	0.982187	0.280398	0.807035	0.947383	0.538202	0.414182
BnaA03g15370D	106437792	auxin-responsive protein IAA13-like	AT2G33310.1	IAA13	auxin-induced protein 13	K14484	auxin signaling	0.231725	1.05852	1.34687	0.138032	0.855075	0.698372	0.664253	0.027541	0.0354778	0.836631	0.0732987	0.422747
BnaA05g10300D	106367474	auxin-responsive protein IAA13-like	AT2G33310.1	IAA13	auxin-induced protein 13	K14484	auxin signaling	0.145151	0.156995	0.2282	-0.00308794	-0.234169	-0.310941	0.760494	0.787103	0.847621	1	0.648555	0.795429
BnaC03g18580D	106388029	auxin-responsive protein IAA13	AT2G33310.1	IAA13	auxin-induced protein 13	K14484	auxin signaling	-0.0230076	0.050166	0.293841	0.0410051	0.32231	0.0454653	0.979701	0.954773	0.806468	0.972732	0.544476	1
BnaC04g11220D	106451148	auxin-responsive protein IAA13 isoform X2	AT2G33310.1	IAA13	auxin-induced protein 13	K14484	auxin signaling	-0.151555	0.0462426	0.228664	0.182029	0.168428	-0.0778871	0.658749	0.933084	0.78084	0.618596	0.664261	0.987403
BnaC05g02280D	106402229	auxin-responsive protein IAA10	AT1G04100.1	IAA10	indoleacetic acid-induced protein 10	K14484	auxin signaling	0.441575	-0.233974	0.439294	0.736116	0.230312	0.284661	0.230617	0.627836	0.590031	0.0421961	0.624279	0.783027
BnaA10g02380D	106370943	auxin-responsive protein IAA10	AT1G04100.1	IAA10	indoleacetic acid-induced protein 10	K14484	auxin signaling	0.438928	-0.284996	1.08088	0.609873	-0.0729433	-0.345241	0.169287	0.477357	0.0256246	0.0544212	0.888762	0.666505
BnaA04g27430D	106449048	auxin-responsive protein IAA30-like	AT3G62100.1	IAA30	indole-3-acetic acid inducible 30	K14484	auxin signaling	1.82364	-0.372041	0.676132	2.04355	-1.27703	0.0435516	0.000309165	0.616104	0.853789	0.000103659	0.0236781	1
BnaA07g19140D	106356870	auxin-responsive protein IAA30	AT3G62100.1	IAA30	indole-3-acetic acid inducible 30	K14484	auxin signaling	1.45541	0.456516	2.37097	2.01472	0.293831	-1.78341	0.0338373	0.624232	0.113062	0.00347855	0.773022	0.365198
BnaC06g18310D	111211370	auxin-responsive protein IAA30-like isoform X1	AT3G62100.1	IAA30	indole-3-acetic acid inducible 30	K14484	auxin signaling	-0.0287967	-1.12338	1.64569	0.409981	-0.0350078	0.65531	0.988056	0.209865	0.0947975	0.654474	0.998549	0.709427
BnaA09g39680D	106365113	auxin-responsive protein IAA30-like	AT3G62100.1	IAA30	indole-3-acetic acid inducible 30	K14484	auxin signaling	-1.75748	-2.24333	0.884334	-1.66966	-2.44031	-1.65945	0.00912998	0.000770826	0.638434	0.0268347	0.000749511	0.513728
BnaA05g22670D	106345288	auxin-responsive protein IAA31-like isoform X2	AT3G17600.1	IAA31	indole-3-acetic acid inducible 31	K14484	auxin signaling	-0.712264	-1.74422	-1.65987	0.0902979	-2.29476	0.519226	0.470164	0.131336	0.481974	0.971235	0.027356	0.870407
BnaC05g35940D	106422875	auxin-responsive protein IAA31-like	AT3G17600.1	IAA31	indole-3-acetic acid inducible 31	K14484	auxin signaling	-0.721459	-1.70269	0.294197	-0.857089	-1.39034	0.110635	0.448378	0.0943353	0.953758	0.436689	0.18845	1
BnaA06g09800D	106377065	auxin-responsive protein IAA34	AT1G15050.2	IAA34	indole-3-acetic acid inducible 34	K14484	auxin signaling	4.71887	1.90545	0.447792	3.51545	2.70111	0.0877959	0.00258515	0.313484	0.990813	0.0557101	0.193606	1
BnaA03g51960D	106423411	auxin-responsive protein IAA29-like	AT4G32280.1	IAA29	indole-3-acetic acid inducible 29	K14484	auxin signaling	0.145737	-1.87142	1.80388	-2.18641	-1.15453	-0.443847	0.917257	0.268606	0.022582	0.0372396	0.279298	0.79997
BnaA01g04710D	106399310	auxin-responsive protein IAA29-like isoform X1	AT4G32280.1	IAA29	indole-3-acetic acid inducible 29	K14484	auxin signaling	-0.0185493	0.0146105	3.42444	0.0617398	-1.63893	-0.709632	1	1	0.00119504	1	0.469151	0.776564
BnaC01g06240D	106399310	auxin-responsive protein IAA29-like isoform X1	AT4G32280.1	IAA29	indole-3-acetic acid inducible 29	K14484	auxin signaling	-1.38818	-2.7248	2.81571	0.123857	-3.51151	-0.315906	0.424418	0.10156	0.0401794	0.989851	0.100943	0.958205
BnaA07g19520D	106353328	protein TRANSPORT INHIBITOR RESPONSE 1-like	AT3G62980.1	TIR1	F-box/RNI-like superfamily protein	K14485	auxin signaling	0.505796	0.237711	0.112271	0.7334	0.115306	-0.00477627	0.0285956	0.436974	0.883514	0.00205054	0.740962	1
BnaA09g40340D	106375233	protein TRANSPORT INHIBITOR RESPONSE 1 isoform X1	AT3G62980.1	TIR1	F-box/RNI-like superfamily protein	K14485	auxin signaling	0.280689	0.543192	-0.0513971	0.455122	0.293749	-0.211248	0.200203	0.0137263	0.97779	0.0402626	0.232876	0.680315
BnaC08g32660D	106415042	protein TRANSPORT INHIBITOR RESPONSE 1-like] [partial	AT3G62980.1	TIR1	F-box/RNI-like superfamily protein	K14485	auxin signaling	0.236121	0.267722	0.230129	0.173152	0.310461	-0.0551195	0.395932	0.400634	0.667183	0.588037	0.295713	0.994826
BnaA04g00230D	106444880	protein TRANSPORT INHIBITOR RESPONSE 1-like	AT3G62980.1	TIR1	F-box/RNI-like superfamily protein	K14485	auxin signaling	0.214932	0.293803	-0.0367779	0.158362	0.095568	-0.73875	0.545903	0.453917	1	0.711104	0.845987	0.116288
BnaCnng60850D	111212233	protein TRANSPORT INHIBITOR RESPONSE 1	AT3G62980.1	TIR1	F-box/RNI-like superfamily protein	K14485	auxin signaling	0.154241	0.410931	-0.0241925	0.303365	0.315267	-0.145479	0.528868	0.0796997	1	0.201327	0.190779	0.807144
BnaC06g43000D	106390402	protein TRANSPORT INHIBITOR RESPONSE 1	AT3G62980.1	TIR1	F-box/RNI-like superfamily protein	K14485	auxin signaling	0.0950384	0.32738	-0.360754	0.176459	0.406721	-0.28523	0.791548	0.349814	0.489957	0.632208	0.217343	0.66043
BnaA06g14040D	106346987	auxin response factor 5	AT1G19850.1	MP	Transcriptional factor B3 family protein / auxin-responsive factor AUX/IAA-like protein	K14486	auxin signaling	1.21001	0.353146	0.925461	0.382399	-0.309944	0.810063	0.000274889	0.428993	0.120778	0.346719	0.477157	0.235607
BnaC05g15390D	106415718	auxin response factor 5-like	AT1G19850.1	MP	Transcriptional factor B3 family protein / auxin-responsive factor AUX/IAA-like protein	K14486	auxin signaling	1.09298	0.39399	0.570177	0.712465	-0.0187942	-0.232336	0.00564163	0.45308	0.464079	0.110422	0.998742	0.872415
BnaA08g31250D	106443862	auxin response factor 5	AT1G19850.1	MP	Transcriptional factor B3 family protein / auxin-responsive factor AUX/IAA-like protein	K14486	auxin signaling	0.170127	-0.536569	0.330066	-0.218281	-0.494666	1.06162	0.684648	0.186497	0.743778	0.623024	0.217938	0.130318
BnaC08g19040D	106433157	auxin response factor 5-like	AT1G19850.1	MP	Transcriptional factor B3 family protein / auxin-responsive factor AUX/IAA-like protein	K14486	auxin signaling	-0.801286	-0.931041	0.687503	-1.03385	-1.37591	0.922407	0.0158347	0.00875024	0.21187	0.00208334	5.2387e-05	0.0756063
BnaA07g11660D	106358270	auxin response factor 5-like isoform X1	AT1G19850.1	MP	Transcriptional factor B3 family protein / auxin-responsive factor AUX/IAA-like protein	K14486	auxin signaling	-1.42987	-1.07915	0.17268	-1.54835	-1.29211	0.374343	0.000210436	0.0121025	0.916264	8.66834e-05	0.00189954	0.725771
BnaC07g48490D	106411172	auxin response factor 5	AT1G19850.1	MP	Transcriptional factor B3 family protein / auxin-responsive factor AUX/IAA-like protein	K14486	auxin signaling	-1.61687	-1.52495	0.0686688	-1.68639	-1.56065	0.567072	2.38993e-06	2.73196e-05	0.999186	1.24947e-06	1.50024e-05	0.425848
BnaC04g18710D	106376940	auxin response factor 1 isoform X1	AT1G59750.3	ARF1	auxin response factor 1	K14486	auxin signaling	1.13236	0.321615	-2.31324	0.203821	0.532743	0.35034	0.0792831	0.728645	0.327169	0.713732	0.267335	0.815982
BnaC01g28340D	106376742	auxin response factor 1 isoform X2	AT1G59750.2	ARF1	auxin response factor 1	K14486	auxin signaling	0.5665	0.156172	0.374387	0.692012	0.1586	0.5685	0.0205448	0.656784	0.399045	0.00526735	0.633923	0.146176
BnaA01g35830D	106376940	auxin response factor 1 isoform X3	AT1G59750.2	ARF1	auxin response factor 1	K14486	auxin signaling	0.288751	0.0351842	0.323295	0.542946	-0.0460874	0.157188	0.205612	0.933182	0.392756	0.0131027	0.904977	0.79522
BnaA05g09790D	106347201	auxin response factor 3-like	AT2G33860.1	ETT	Transcriptional factor B3 family protein / auxin-responsive factor AUX/IAA-like protein	K14486	auxin signaling	-0.891874	-0.639981	0.130857	-1.02185	-0.368374	0.223719	0.000185401	0.0166864	0.876091	3.44851e-05	0.200867	0.724671
BnaCnng05140D	106451191	auxin response factor 3	AT2G33860.1	ETT	Transcriptional factor B3 family protein / auxin-responsive factor AUX/IAA-like protein	K14486	auxin signaling	-1.32925	-1.07821	0.805359	-1.34277	-1.40413	0.261289	4.26934e-08	2.87823e-05	0.0162848	5.94509e-08	2.80779e-08	0.684245
BnaA04g19890D	106447200	auxin response factor 3-like isoform X2	AT2G33860.1	ETT	Transcriptional factor B3 family protein / auxin-responsive factor AUX/IAA-like protein	K14486	auxin signaling	-1.4363	-0.621774	0.403149	-1.66657	-0.939068	-0.326454	5.74964e-08	0.048493	0.407175	1.32715e-09	0.00158819	0.621808
BnaA02g05070D	106425782	auxin response factor 7-like	AT5G20730.2	NPH4	Transcriptional factor B3 family protein / auxin-responsive factor AUX/IAA-like protein	K14486	auxin signaling	-0.624091	-0.224466	-0.185829	-0.770891	-0.489948	0.111426	0.00973841	0.483204	0.753175	0.0015765	0.0667805	0.908245
BnaA10g14760D	106371714	auxin response factor 7	AT5G20730.2	NPH4	Transcriptional factor B3 family protein / auxin-responsive factor AUX/IAA-like protein	K14486	auxin signaling	-0.700502	-0.0889853	0.378862	-0.751216	0.00393211	0.429142	0.00111013	0.798245	0.316696	0.000879368	1	0.289266
BnaC09g37130D	106376592	auxin response factor 7-like isoform X1	AT5G20730.2	NPH4	Transcriptional factor B3 family protein / auxin-responsive factor AUX/IAA-like protein	K14486	auxin signaling	-0.897129	-0.271027	0.283508	-0.64443	-0.119238	0.244118	2.4264e-06	0.266252	0.459306	0.00137751	0.670595	0.607054
BnaC07g38640D	106410461	auxin response factor 9-like isoform X1	AT4G23980.1	ARF9	auxin response factor 9	K14486	auxin signaling	-1.03326	-0.598771	0.33684	-0.2006	-0.437863	0.209428	1.94173e-05	0.0300625	0.543493	0.525114	0.121545	0.776444
BnaA03g46370D	106410461	auxin response factor 9-like isoform X3	AT4G23980.1	ARF9	auxin response factor 9	K14486	auxin signaling	-1.41369	-0.882042	0.261537	-1.03262	-0.816295	0.316172	2.24374e-06	0.00818086	0.728439	0.00101458	0.0135341	0.721652
BnaA01g13580D	106414111	auxin response factor 9-like isoform X1	AT4G23980.1	ARF9	auxin response factor 9	K14486	auxin signaling	-2.94967	-0.971398	1.00315	-2.71092	-1.46856	0.087339	1.83328e-08	0.10674	0.301876	5.84633e-07	0.00998654	1
BnaC01g15800D	106419578	auxin response factor 9-like	AT4G23980.1	ARF9	auxin response factor 9	K14486	auxin signaling	-4.24375	-2.45725	1.24638	-2.51767	-2.37721	0.331233	3.17223e-11	0.000134562	0.617679	4.46583e-05	0.000179451	0.906291
BnaA06g03580D	111198816	4-substituted benzoates-glutamate ligase GH3.12-like	AT1G23160.1		Auxin-responsive GH3 family protein	K14487	auxin signaling	0.128288	0.0220434	-2.22551	-0.607479	-0.09302	-0.0190361	0.891181	0.998142	0.640483	0.480974	0.950896	1
BnaA06g03550D	111216217	4-substituted benzoates-glutamate ligase GH3.12-like	AT1G23160.1		Auxin-responsive GH3 family protein	K14487	auxin signaling	-1.03477	-1.0961	1.54682	-1.32868	-2.5931	-0.771171	0.151579	0.177462	0.149343	0.0820693	0.000511669	0.647605
BnaA06g03570D	106382092	4-substituted benzoates-glutamate ligase GH3.12-like isoform X2][protein_id	AT1G23160.1		Auxin-responsive GH3 family protein	K14487	auxin signaling	-1.8262	-0.192683	0.636438	0.145299	-2.89075	0.409889	1.21263e-08	0.688712	0.201925	0.971964	0.161048	0.57053
BnaC06g02210D	106382088	4-substituted benzoates-glutamate ligase GH3.12-like	AT1G23160.1		Auxin-responsive GH3 family protein	K14487	auxin signaling	-2.79539	-3.1154	-0.461288	-2.24597	-2.50273	-1.37812	7.08299e-07	3.64245e-07	0.638434	5.52141e-07	5.84722e-08	0.0717779
BnaA07g08630D	111200962	indole-3-acetic acid-amido synthetase GH3.17-like	AT1G28130.1	GH3.17	Auxin-responsive GH3 family protein	K14487	auxin signaling	-2.1788	-1.36069	3.07842	-2.35978	-1.89376	2.15791	3.37017e-06	0.00729419	0.443501	7.72455e-07	7.97353e-05	0.182053
BnaCnng41900D	106358052	indole-3-acetic acid-amido synthetase GH3.17	AT1G28130.1	GH3.17	Auxin-responsive GH3 family protein	K14487	auxin signaling	-2.36639	-1.38263	-3.12394	-1.95478	-1.93335	0.0235393	6.58186e-07	0.00761621	0.437274	5.17816e-05	9.21785e-05	1
BnaA09g27530D	111200962	indole-3-acetic acid-amido synthetase GH3.17-like	AT1G28130.1	GH3.17	Auxin-responsive GH3 family protein	K14487	auxin signaling	-2.40707	-1.66844	4.59355	-2.08928	-2.13261	-2.9515	1.61232e-05	0.00396263	0.0936464	0.000235598	9.68512e-05	0.573431
BnaCnng41890D	106358052	indole-3-acetic acid-amido synthetase GH3.17	AT1G28130.2	GH3.17	Auxin-responsive GH3 family protein	K14487	auxin signaling	-2.41089	-1.41803	0.780061	-2.07879	-2.21756	-0.147611	1.5593e-06	0.0100629	0.899175	4.30751e-05	2.05857e-05	1
BnaUnng04720D	106395849	indole-3-acetic acid-amido synthetase GH3.17-like	AT1G28130.2	GH3.17	Auxin-responsive GH3 family protein	K14487	auxin signaling	-2.74191	-1.24412	-0.0576226	-2.34183	-1.85463	1.28295	1.62967e-07	0.0305848	1	7.41113e-06	0.000533088	0.793439
BnaCnng66170D	111200962	indole-3-acetic acid-amido synthetase GH3.17-like	AT1G28130.1	GH3.17	Auxin-responsive GH3 family protein	K14487	auxin signaling	-3.03611	-2.06446	-3.12353	-1.47442	-2.26729	0.22161	2.19902e-07	2.2338e-05	0.43595	0.00425614	5.70305e-07	0.977903
BnaC06g06030D	111207327	4-substituted benzoates-glutamate ligase GH3.12-like	AT1G48660.1		Auxin-responsive GH3 family protein	K14487	auxin signaling	0.462234	0.539962	0.324147	-0.423578	-0.278211	-0.46699	0.25693	0.234366	0.707152	0.356193	0.585472	0.593912
BnaA04g16140D	106449956	4-substituted benzoates-glutamate ligase GH3.12-like isoform X1][protein_id	AT1G48660.1		Auxin-responsive GH3 family protein	K14487	auxin signaling	-1.61011	-1.64749	-0.569851	-1.19452	-1.96823	0.635948	0.00165792	0.00350823	0.878992	0.0268372	0.000259216	0.643715
BnaC07g44350D	106423303	4-substituted benzoates-glutamate ligase GH3.12-like	AT1G48670.2		auxin-responsive GH3 family protein	K14487	auxin signaling	2.78326	-2.3744	1.12095	-1.2588	-1.9214	-2.05882	0.00333477	0.0253354	0.638434	0.224259	0.0598618	0.562058
BnaA09g48080D	106419883	4-substituted benzoates-glutamate ligase GH3.12-like	AT1G48670.2		auxin-responsive GH3 family protein	K14487	auxin signaling	0.505901	-2.96728	-0.00162054	0.895907	-1.70187	-0.018847	0.183784	6.20654e-16	1	0.0142713	2.2199e-06	1
BnaC07g51040D	106423295	4-substituted benzoates-glutamate ligase GH3.12-like isoform X3][protein_id	AT1G48670.1		auxin-responsive GH3 family protein	K14487	auxin signaling	-0.12005	-1.79869	0.856152	-0.627912	-1.62141	-0.0973764	0.910811	0.0693002	0.422361	0.56631	0.18722	1
BnaCnng49810D	106419884	4-substituted benzoates-glutamate ligase GH3.12-like	AT1G48670.1		auxin-responsive GH3 family protein	K14487	auxin signaling	-1.16939	-3.42038	-0.0312036	0.0461736	-2.52161	-2.97699	0.00231343	4.37614e-18	1	0.960431	3.93627e-11	0.567083
BnaA09g48120D	106419902	4-substituted benzoates-glutamate ligase GH3.12-like isoform X2][protein_id	AT1G48670.1		auxin-responsive GH3 family protein	K14487	auxin signaling	-1.29964	-2.06731	3.102	-1.33769	-1.49683	-0.00283889	0.00513832	0.000178352	0.438608	0.00279212	0.00279993	1
BnaA09g48110D	106419902	4-substituted benzoates-glutamate ligase GH3.12-like isoform X1][protein_id	AT1G48670.2		auxin-responsive GH3 family protein	K14487	auxin signaling	-1.43503	-2.15571	0.803467	-1.01386	-1.89907	0.0937636	0.000324382	2.45456e-07	0.54886	0.0161007	4.43702e-06	1
BnaA09g15010D	106366604	4-substituted benzoates-glutamate ligase GH3.12	AT1G48670.1		auxin-responsive GH3 family protein	K14487	auxin signaling	-1.79508	-3.36418	-0.0368501	-1.47534	-3.14375	0.887762	0.000277578	7.17284e-11	1	0.0030539	4.21882e-10	0.897997
BnaA09g48090D	106419884	4-substituted benzoates-glutamate ligase GH3.12-like	AT1G48670.1		auxin-responsive GH3 family protein	K14487	auxin signaling	-2.23183	-3.14844	-0.0137897	-1.08921	-1.80373	-0.0298108	0.000919244	1.8011e-05	1	0.132723	0.0101486	1
BnaCnng49820D	106387098	4-substituted benzoates-glutamate ligase GH3.12-like	AT1G48670.1		auxin-responsive GH3 family protein	K14487	auxin signaling	-2.26281	-2.67898	0.0106153	-1.43925	-1.88073	0.0008289	2.71254e-08	1.57197e-10	1	0.000253811	2.69994e-06	1
BnaA05g14780D	111207327	4-substituted benzoates-glutamate ligase GH3.12-like	AT1G48670.1		auxin-responsive GH3 family protein	K14487	auxin signaling	-2.58565	-1.58571	0.909823	-0.741208	1.8433	-0.0234078	0.00511688	0.148921	0.694295	0.765435	0.393404	1
BnaCnng28110D	106350325	4-substituted benzoates-glutamate ligase GH3.12-like	AT1G48670.1		auxin-responsive GH3 family protein	K14487	auxin signaling	-2.63079	-0.921509	0.880135	-1.71566	-1.23662	0.389832	5.36794e-12	0.0183511	0.0217504	8.01432e-06	0.00230672	0.531155
BnaC09g31070D	106395221	4-substituted benzoates-glutamate ligase GH3.12-like	AT1G48670.1		auxin-responsive GH3 family protein	K14487	auxin signaling	-5.03853	-2.59082	-1.63601	-4.48348	-3.05044	0.563319	6.04994e-09	0.00107259	0.279287	1.37054e-06	0.000185704	0.74469
BnaA09g52740D	106432954	probable indole-3-acetic acid-amido synthetase GH3.1	AT2G14960.1	GH3.1	Auxin-responsive GH3 family protein	K14487	auxin signaling	1.45178	-0.672544	0.790156	1.79565	-1.03972	1.47509	0.000536902	0.205943	0.894386	3.10714e-05	0.0383667	0.477539
BnaCnng22400D	106409452	probable indole-3-acetic acid-amido synthetase GH3.1	AT2G14960.1	GH3.1	Auxin-responsive GH3 family protein	K14487	auxin signaling	0.20777	-1.1116	-0.0337887	0.666555	-1.30326	4.70054	0.847931	0.263979	1	0.497911	0.162628	0.128975
BnaA09g42140D	106377184	indole-3-acetic acid-amido synthetase GH3.3	AT2G23170.1	GH3.3	Auxin-responsive GH3 family protein	K14487	auxin signaling	-2.14348	-1.94536	1.30096	-1.58623	-3.63445	-0.914459	0.000384843	0.0026673	0.385204	0.0114215	1.22713e-08	0.602395
BnaC08g34560D	106377184	indole-3-acetic acid-amido synthetase GH3.3	AT2G23170.1	GH3.3	Auxin-responsive GH3 family protein	K14487	auxin signaling	-2.80013	-2.31729	-0.362983	-1.3551	-3.82786	-3.88182	0.000771153	0.00828989	0.960348	0.11653	8.92685e-06	0.358843
BnaC09g00690D	106435141	indole-3-acetic acid-amido synthetase GH3.10	AT4G03400.1	DFL2	Auxin-responsive GH3 family protein	K14487	auxin signaling	-0.209374	-0.492557	-0.0790763	-0.962982	-1.20697	-0.227802	0.692211	0.365597	0.993996	0.0341688	0.0154502	0.860386
BnaA09g01540D	106401025	indole-3-acetic acid-amido synthetase GH3.10	AT4G03400.1	DFL2	Auxin-responsive GH3 family protein	K14487	auxin signaling	-0.673985	-0.852539	0.101649	-1.15674	-1.4961	-0.405701	0.170589	0.111962	0.98329	0.02061	0.00570244	0.722541
BnaA01g16300D	106445777	indole-3-acetic acid-amido synthetase GH3.5-like	AT4G27260.1	WES1	Auxin-responsive GH3 family protein	K14487	auxin signaling	2.76452	1.20232	0.629977	2.64405	0.494528	0.0688505	3.0833e-07	0.0479919	0.736998	1.52741e-06	0.468854	1
BnaA03g48550D	106440950	indole-3-acetic acid-amido synthetase GH3.5 isoform X2	AT4G27260.1	WES1	Auxin-responsive GH3 family protein	K14487	auxin signaling	1.79529	-0.32402	0.247563	1.66229	-0.102588	-1.2457	4.42892e-07	0.51156	1	5.13304e-06	0.867613	0.599194
BnaC07g40810D	106409348	indole-3-acetic acid-amido synthetase GH3.5	AT4G27260.1	WES1	Auxin-responsive GH3 family protein	K14487	auxin signaling	0.62984	-1.01117	0.455751	0.666519	-0.686643	0.297895	0.163392	0.0315221	0.819455	0.159458	0.162616	0.96397
BnaC01g19430D	106376087	indole-3-acetic acid-amido synthetase GH3.5	AT4G27260.1	WES1	Auxin-responsive GH3 family protein	K14487	auxin signaling	0.553289	0.406435	0.532741	1.29605	0.0488339	-1.59796	0.419746	0.639589	0.935849	0.0471146	0.980951	0.649876
BnaA01g00580D	111214866	indole-3-acetic acid-amido synthetase GH3.2	AT4G37390.1	BRU6	Auxin-responsive GH3 family protein	K14487	auxin signaling	2.66519	0.482504	0.0110858	2.12359	-0.0432112	-0.00107058	1.27979e-05	0.55971	1	0.000662668	0.98475	1
BnaC01g01570D	106426779	indole-3-acetic acid-amido synthetase GH3.2 isoform X1	AT4G37390.1	BRU6	Auxin-responsive GH3 family protein	K14487	auxin signaling	1.43099	-1.30125	4.31071	0.769663	-1.43196	-2.97979	0.00916474	0.0310919	0.145406	0.218727	0.0170706	0.570016
BnaC09g43750D	111200983	4-substituted benzoates-glutamate ligase GH3.12-like	AT5G13320.3	PBS3	Auxin-responsive GH3 family protein	K14487	auxin signaling	-0.500866	0.151776	0.949973	0.220854	0.34617	0.658238	0.422565	0.872852	0.327942	0.787624	0.649016	0.599685
BnaA06g03560D	111216217	4-substituted benzoates-glutamate ligase GH3.12-like	AT5G13320.3	PBS3	Auxin-responsive GH3 family protein	K14487	auxin signaling	-0.946766	-1.00258	1.39769	-1.06453	-2.49669	-1.28608	0.133831	0.167243	0.222554	0.136621	0.000125888	0.276899
BnaA10g19970D	106418215	4-substituted benzoates-glutamate ligase GH3.12-like	AT5G13320.3	PBS3	Auxin-responsive GH3 family protein	K14487	auxin signaling	-1.03052	-0.497178	0.27869	-0.307875	-0.047464	0.178329	0.0321771	0.419697	0.835304	0.620966	0.969342	0.940159
BnaC02g04650D	106407722	4-substituted benzoates-glutamate ligase GH3.12-like	AT5G13320.3	PBS3	Auxin-responsive GH3 family protein	K14487	auxin signaling	-1.09074	-0.741345	-0.506019	-0.683307	0.608461	-5.15843	0.402726	0.656304	0.940534	0.651729	0.709319	0.155849
BnaA02g01560D	106384098	4-substituted benzoates-glutamate ligase GH3.12	AT5G13320.3	PBS3	Auxin-responsive GH3 family protein	K14487	auxin signaling	-1.83254	-0.317222	-5.67183	-0.420956	-1.31749	-0.69236	0.0731919	0.85663	0.0310181	0.762781	0.282016	0.867156
BnaC03g05810D	106454850	4-substituted benzoates-glutamate ligase GH3.12 isoform X1	AT5G13320.3	PBS3	Auxin-responsive GH3 family protein	K14487	auxin signaling	-2.78985	-1.17628	0.462501	-1.51802	-1.05078	0.730917	0.00469832	0.340743	0.944094	0.169481	0.380335	0.878965
BnaAnng25670D	106357730	indole-3-acetic acid-amido synthetase GH3.17-like	AT5G13360.2		Auxin-responsive GH3 family protein	K14487	auxin signaling	0.0008415	-0.00031539	0.468313	-0.0193673	-0.00791623	0.318801	1	1	0.803298	1	1	0.916108
BnaC03g05840D	106431953	indole-3-acetic acid-amido synthetase GH3.17-like	AT5G13360.2		Auxin-responsive GH3 family protein	K14487	auxin signaling	-1.47602	-1.54607	0.622978	-1.27906	-2.97973	-0.90571	0.109677	0.164399	0.759868	0.292919	0.0510664	0.652265
BnaA03g04300D	106431953	indole-3-acetic acid-amido synthetase GH3.17-like	AT5G13360.2		Auxin-responsive GH3 family protein	K14487	auxin signaling	-1.8899	-1.9366	0.028045	-2.61146	-1.79301	0.397113	0.000142382	0.00110054	1	2.39844e-06	0.0108427	0.716254
BnaC02g04680D	106357730	indole-3-acetic acid-amido synthetase GH3.17-like	AT5G13370.1		Auxin-responsive GH3 family protein	K14487	auxin signaling	-0.101594	1.63798	1.42133	0.040634	1.94157	1.52456	1	0.481173	0.657579	1	0.404695	0.695518
BnaC03g05830D	106431953	indole-3-acetic acid-amido synthetase GH3.17-like	AT5G13370.1		Auxin-responsive GH3 family protein	K14487	auxin signaling	-1.98527	-1.46168	0.784115	-1.52547	-2.31308	0.183076	0.0095419	0.0972253	0.619033	0.0675276	0.00826313	0.986243
BnaC02g04690D	106357730	indole-3-acetic acid-amido synthetase GH3.17-like	AT5G13370.1		Auxin-responsive GH3 family protein	K14487	auxin signaling	-2.83773	0.0429359	1.08544	0.032947	0.0160872	0.799031	0.121598	1	0.531091	1	1	0.721711
BnaA06g06420D	106357918	4-substituted benzoates-glutamate ligase GH3.12	AT5G51470.1		Auxin-responsive GH3 family protein	K14487	auxin signaling	-0.0245782	0.0333726	0.665275	1.79976	-1.63191	0.0627782	1	1	0.56079	0.380393	0.465922	1
BnaC03g30320D	106395221	4-substituted benzoates-glutamate ligase GH3.12-like	AT5G51470.2		Auxin-responsive GH3 family protein	K14487	auxin signaling	-0.0382716	0.0343296	0.0113635	0.0354736	0.0158179	0.255802	1	1	1	1	1	0.951443
BnaAnng30610D	106385465	4-substituted benzoates-glutamate ligase GH3.12-like	AT5G51470.2		Auxin-responsive GH3 family protein	K14487	auxin signaling	-0.235489	-0.711859	0.813596	-0.387366	-1.444	-0.00186753	0.543638	0.0563162	0.888145	0.315296	1.67558e-05	1
BnaC01g04630D	106365198	4-substituted benzoates-glutamate ligase GH3.12-like	AT5G51470.1		Auxin-responsive GH3 family protein	K14487	auxin signaling	-2.01764	-3.87531	-0.0403431	-1.19537	-3.37051	-0.0121032	0.00111617	8.69459e-09	1	0.0741094	3.28195e-07	1
BnaC09g15640D	111197996	4-substituted benzoates-glutamate ligase GH3.12-like	AT5G51470.1		Auxin-responsive GH3 family protein	K14487	auxin signaling	-3.09116	-2.8552	-0.0832017	-2.93761	-2.99517	-0.12227	1.96054e-07	4.2468e-06	1	9.55758e-07	1.13065e-06	1
BnaA03g11840D	106437258	indole-3-acetic acid-amido synthetase GH3.6-like	AT5G54510.1	DFL1	Auxin-responsive GH3 family protein	K14487	auxin signaling	-0.450173	0.0943896	-0.106312	-0.846897	-0.295299	2.53903	0.335482	0.903174	1	0.0745501	0.641852	0.625437
BnaC03g14570D	106346022	indole-3-acetic acid-amido synthetase GH3.6-like	AT5G54510.1	DFL1	Auxin-responsive GH3 family protein	K14487	auxin signaling	-1.32298	-0.514373	2.2615	-1.25019	-0.264047	-1.19313	0.00129113	0.335699	0.638434	0.00324343	0.649357	0.56968
BnaAnng25610D	111213957	indole-3-acetic acid-amido synthetase GH3.6	AT5G54510.1	DFL1	Auxin-responsive GH3 family protein	K14487	auxin signaling	-1.84016	-1.55689	0.503574	-2.00877	-1.05785	0.582314	0.000368995	0.00556262	0.738465	0.000283755	0.0797771	0.84988
BnaCnng39150D	111213957	indole-3-acetic acid-amido synthetase GH3.6	AT5G54510.1	DFL1	Auxin-responsive GH3 family protein	K14487	auxin signaling	-2.70057	-1.75417	0.156332	-2.68638	-1.81449	-0.294276	6.6714e-09	0.000353983	0.990209	1.02724e-08	0.000177701	0.897156
BnaA07g11670D	106356457	auxin-responsive protein SAUR50-like	AT1G19840.1		SAUR-like auxin-responsive protein family	K14488	auxin signaling	5.04206	5.39208	0.0241298	3.82406	5.03484	-2.5277	1.41371e-08	1.11942e-07	1	8.78901e-06	4.76786e-08	0.66156
BnaA06g14030D	106351463	auxin-responsive protein SAUR50	AT1G19840.1		SAUR-like auxin-responsive protein family	K14488	auxin signaling	2.73616	1.13919	-0.912874	0.855572	0.753848	0.264762	1.85736e-09	0.0432761	0.245204	0.0824868	0.141272	0.864241
BnaA08g31240D	106369880	auxin-responsive protein SAUR50-like	AT1G19840.1		SAUR-like auxin-responsive protein family	K14488	auxin signaling	0.552638	-0.0929688	0.0403015	1.53427	0.849271	4.00363	0.502975	0.953225	1	0.029854	0.288373	0.257949
BnaCnng59650D	106413747	auxin-responsive protein SAUR50-like	AT1G19840.1		SAUR-like auxin-responsive protein family	K14488	auxin signaling	0.280745	-0.465171	-0.168579	0.348683	-0.765735	-0.19037	0.566029	0.397529	0.925695	0.503894	0.112142	0.916171
BnaC08g19010D	106433167	auxin-responsive protein SAUR50	AT1G19840.1		SAUR-like auxin-responsive protein family	K14488	auxin signaling	-0.846402	-0.862379	-2.03971	-0.107271	-0.331175	-1.86891	0.0732853	0.109877	0.440372	0.902368	0.597156	0.400499
BnaC07g48500D	106409080	auxin-responsive protein SAUR50-like	AT1G19840.1		SAUR-like auxin-responsive protein family	K14488	auxin signaling	-1.03862	-0.699811	-2.08639	-1.09323	-0.368981	-0.372998	0.125112	0.411091	0.0681524	0.133702	0.680986	0.88841
BnaC06g22290D	106433349	auxin-responsive protein SAUR50	AT1G75580.1		SAUR-like auxin-responsive protein family	K14488	auxin signaling	5.10731	3.01968	0.0351032	4.18399	2.9129	-0.139115	7.61297e-14	9.06827e-06	1	1.80931e-09	4.78596e-05	0.99532
BnaAnng09090D	106421574	auxin-responsive protein SAUR50-like	AT1G75580.1		SAUR-like auxin-responsive protein family	K14488	auxin signaling	2.48725	0.287678	-1.02618	1.3797	0.149241	-1.34346	1.16531e-05	0.747389	0.378171	0.0257237	0.872841	0.369207
BnaC06g36290D	106421574	auxin-responsive protein SAUR50-like	AT1G75580.1		SAUR-like auxin-responsive protein family	K14488	auxin signaling	1.04732	-1.1408	-3.30645	1.72256	-0.0355772	-0.493134	0.273521	0.229415	0.00604014	0.110714	0.998549	0.951125
BnaA07g21620D	106356964	auxin-responsive protein SAUR50-like	AT1G75580.1		SAUR-like auxin-responsive protein family	K14488	auxin signaling	0.58092	1.38122	0.581586	0.161016	-0.317302	-0.103355	0.479458	0.172822	0.691722	0.914768	0.822567	1
BnaA02g17300D	106422364	auxin-responsive protein SAUR50	AT1G75580.1		SAUR-like auxin-responsive protein family	K14488	auxin signaling	-0.846037	-2.44664	-0.169147	-3.05105	-2.40378	-0.881065	0.431379	0.0112552	0.98721	0.00257041	0.00664774	0.640236
BnaC02g23710D	106377128	auxin-responsive protein SAUR50-like isoform X1	AT1G75580.1		SAUR-like auxin-responsive protein family	K14488	auxin signaling	-2.1132	-3.90978	0.414909	-1.30578	-2.34196	0.123118	0.244213	0.0428274	0.931243	0.445499	0.180785	1
BnaAnng09080D	106421583	auxin-responsive protein SAUR50	AT1G75590.1		SAUR-like auxin-responsive protein family	K14488	auxin signaling	2.46271	1.05646	-0.381502	2.79201	1.35352	-0.259562	0.00224771	0.261773	0.93145	0.000303697	0.100975	1
BnaC06g36300D	106421583	auxin-responsive protein SAUR50	AT1G75590.1		SAUR-like auxin-responsive protein family	K14488	auxin signaling	0.985615	1.4004	-2.29534	0.53151	0.106886	-2.993	0.281324	0.126763	0.638434	0.609852	0.955639	0.57105
BnaA02g17320D	106422374	auxin-induced protein 6B	AT1G75590.1		SAUR-like auxin-responsive protein family	K14488	auxin signaling	0.494123	-0.581443	-0.470701	-0.345473	-0.717727	-0.0408454	0.586729	0.622926	0.91411	0.778939	0.568782	1
BnaC02g23690D	106374955	auxin-induced protein 6B	AT1G75590.1		SAUR-like auxin-responsive protein family	K14488	auxin signaling	-1.5478	-2.02795	0.0750965	-1.002	-3.00195	-0.515759	0.0854084	0.0570491	1	0.34243	0.00635974	0.938473
BnaA09g56290D	106414038	auxin-responsive protein SAUR41-like	AT1G16510.1		SAUR-like auxin-responsive protein family	K14488	auxin signaling	1.63594	0.920093	-0.843542	1.82775	1.27182	-0.585754	2.1755e-05	0.0382915	0.435136	3.11816e-06	0.00223384	0.6726
BnaC08g38350D	106414004	auxin-responsive protein SAUR41-like	AT1G16510.1		SAUR-like auxin-responsive protein family	K14488	auxin signaling	1.30427	0.790088	-1.16647	1.75554	0.888305	1.29923	0.00350776	0.150615	0.26408	7.82073e-05	0.0732987	0.172272
BnaA07g34680D	106357414	auxin-responsive protein SAUR40	AT1G79130.1		SAUR-like auxin-responsive protein family	K14488	auxin signaling	0.81741	0.984593	-1.59565	-0.549525	0.935466	-0.927844	0.260505	0.341629	0.236514	0.489288	0.269708	0.631627
BnaA03g39160D	106444249	auxin-responsive protein SAUR50-like	AT2G16580.1		SAUR-like auxin-responsive protein family	K14488	auxin signaling	-1.3894	0.115141	-2.79806	-1.41625	0.529352	-3.54406	0.0473039	0.923794	0.200167	0.0412218	0.516288	0.432214
BnaC03g46450D	106414438	auxin-responsive protein SAUR50-like	AT2G16580.1		SAUR-like auxin-responsive protein family	K14488	auxin signaling	-2.21099	-0.211718	1.30143	-2.51074	-0.487916	-1.04794	0.000253205	0.825715	0.450449	9.68876e-05	0.532551	0.76747
BnaA09g09430D	106399633	auxin-responsive protein SAUR50-like	AT2G18010.1		SAUR-like auxin-responsive protein family	K14488	auxin signaling	0.626521	-0.371486	0.647527	0.260998	-0.908558	-0.324319	0.500518	0.763558	0.745262	0.828655	0.356752	0.933606
BnaC06g01240D	106385905	auxin-responsive protein SAUR50-like	AT2G18010.1		SAUR-like auxin-responsive protein family	K14488	auxin signaling	0.174971	0.751788	-0.383641	0.0034812	-1.65508	0.322489	0.94555	0.746293	0.757628	1	0.461594	0.843204
BnaCnng27280D	106399633	auxin-responsive protein SAUR50-like	AT2G18010.1		SAUR-like auxin-responsive protein family	K14488	auxin signaling	-0.487426	-1.00914	-0.23272	-0.359773	-0.663864	-0.567993	0.525926	0.206182	0.933578	0.680529	0.408061	0.728415
BnaCnng59500D	106394925	auxin-responsive protein SAUR50	AT2G18010.1		SAUR-like auxin-responsive protein family	K14488	auxin signaling	-0.512553	0.434021	0.326078	-0.778346	0.196007	0.0114938	0.21737	0.37675	0.812716	0.0576388	0.721449	1
BnaA07g02140D	106455008	auxin-responsive protein SAUR50-like	AT2G18010.1		SAUR-like auxin-responsive protein family	K14488	auxin signaling	-1.23222	0.51671	-0.320962	-0.529358	0.345704	-0.928872	0.0772698	0.574176	0.907325	0.531188	0.716945	0.673073
BnaA09g43330D	106414013	auxin-responsive protein SAUR50-like	AT2G21220.1		SAUR-like auxin-responsive protein family	K14488	auxin signaling	-1.39517	-1.19423	-0.676059	-3.74413	-2.85246	0.403993	0.432323	0.544173	0.447795	0.0293559	0.169377	0.75556
BnaC08g35940D	106414013	auxin-responsive protein SAUR50-like	AT2G21220.1		SAUR-like auxin-responsive protein family	K14488	auxin signaling	-1.39517	-1.19423	-0.676059	-3.74413	-2.85246	0.403993	0.432323	0.544173	0.447795	0.0293559	0.169377	0.75556
BnaC04g36450D	111211464	auxin-responsive protein SAUR71-like	AT2G24400.1		SAUR-like auxin-responsive protein family	K14488	auxin signaling	-1.48765	-1.31881	0.00123624	-2.59429	-3.97982	-1.13422	0.11954	0.281514	1	0.000734207	2.03921e-06	0.667969
BnaA04g14360D	111211464	auxin-responsive protein SAUR71-like	AT2G24400.1		SAUR-like auxin-responsive protein family	K14488	auxin signaling	-3.22415	-2.76396	-1.17257	-3.96123	-4.99281	-5.41886	0.00236011	0.0173804	0.601875	0.000934381	0.000382589	0.082618
BnaC03g46960D	111213185	auxin-responsive protein SAUR50-like	AT2G28085.1		SAUR-like auxin-responsive protein family	K14488	auxin signaling	2.05447	0.137587	0.738888	-0.514932	0.509872	1.44892	0.0716062	0.960426	0.818773	0.743659	0.772536	0.613581
BnaA03g16580D	106385824	auxin-responsive protein SAUR15	AT2G36210.1		SAUR-like auxin-responsive protein family	K14488	auxin signaling	0.294928	-0.0759365	0.0433036	0.0285547	0.0115113	-0.00968785	0.789162	0.976723	1	1	1	1
BnaA05g08090D	106454706	auxin-induced protein 15A-like	AT2G36210.1		SAUR-like auxin-responsive protein family	K14488	auxin signaling	0.107061	-0.0943868	0.00030992	1.68594	-0.788754	0.00132229	0.892231	0.928401	1	0.00625092	0.24409	1
BnaC04g09120D	106396499	auxin-induced protein 15A-like	AT2G36210.1		SAUR-like auxin-responsive protein family	K14488	auxin signaling	-0.1877	-0.0635408	-3.15205	-0.088538	0.0619867	3.41334	0.732825	0.94433	0.431024	0.903655	0.943124	0.402427
BnaC03g20000D	106385824	auxin-responsive protein SAUR15	AT2G36210.1		SAUR-like auxin-responsive protein family	K14488	auxin signaling	-0.367179	-0.92955	-0.459545	0.0191197	-0.262962	-0.379634	0.580204	0.163236	0.822078	1	0.718445	0.906789
BnaAnng07560D	106450212	auxin-responsive protein SAUR22	AT2G36210.1		SAUR-like auxin-responsive protein family	K14488	auxin signaling	-0.754021	-0.864299	-0.0312807	-0.440509	-0.458377	0.016123	0.173786	0.160315	1	0.485319	0.47145	1
BnaC04g08210D	106388512	indole-3-acetic acid-induced protein ARG7	AT2G37030.1		SAUR-like auxin-responsive protein family	K14488	auxin signaling	-0.00030483	0.00024841	0.0158751	-0.0172281	-0.00768555	-3.77143	1	1	1	1	1	0.751993
BnaA05g07390D	106398810	indole-3-acetic acid-induced protein ARG7-like	AT2G37030.1		SAUR-like auxin-responsive protein family	K14488	auxin signaling	-0.00427877	0.00240448	3.94609	0.0223521	0.00856879	1.42971	1	1	0.362292	1	1	0.8272
BnaC03g20480D	106420002	indole-3-acetic acid-induced protein ARG7	AT2G37030.1		SAUR-like auxin-responsive protein family	K14488	auxin signaling	-0.00482858	0.00498782	2.89604	-0.0637203	-0.0266109	-1.82307	1	1	0.349352	1	1	0.468615
BnaA03g16940D	106420002	indole-3-acetic acid-induced protein ARG7	AT2G37030.1		SAUR-like auxin-responsive protein family	K14488	auxin signaling	-0.024802	0.0229015	3.41332	0.00195029	0.00216017	-4.15788	1	1	0.139961	1	1	0.276899
BnaC03g25200D	106429637	auxin-responsive protein SAUR36-like	AT2G45210.1	SAUR36	SAUR-like auxin-responsive protein family	K14488	auxin signaling	0.367533	-0.783753	0.0112951	0.676657	-0.330954	-0.00640532	0.779767	0.582045	1	0.620577	0.84672	1
BnaA05g01170D	106454424	auxin-responsive protein SAUR32	AT2G46690.1		SAUR-like auxin-responsive protein family	K14488	auxin signaling	-1.05599	0.156448	-0.198987	-0.696339	0.364086	0.331038	0.00502163	0.793271	0.886131	0.0900134	0.444915	0.755273
BnaC04g00740D	106413737	auxin-responsive protein SAUR32	AT2G46690.1		SAUR-like auxin-responsive protein family	K14488	auxin signaling	-2.36482	-0.0577497	0.0431969	-2.67519	-0.130934	0.448584	1.35813e-07	0.952721	1	5.56834e-09	0.861481	0.714436
BnaA04g26700D	106345699	auxin-responsive protein SAUR32-like	AT2G46690.1		SAUR-like auxin-responsive protein family	K14488	auxin signaling	-3.15126	-1.77111	1.44572	-2.95253	-1.94958	0.406631	1.82041e-05	0.0203486	0.227982	7.60374e-05	0.00886291	0.858875
BnaA01g30290D	106375083	auxin-responsive protein SAUR72	AT3G12830.1		SAUR-like auxin-responsive protein family	K14488	auxin signaling	-0.579355	-1.47946	-0.87907	-0.379892	-1.48084	-2.62816	0.333297	0.00465821	0.87734	0.532233	0.00277107	0.253284
BnaA03g32480D	106356792	auxin-responsive protein SAUR72	AT3G12830.1		SAUR-like auxin-responsive protein family	K14488	auxin signaling	-0.705262	-0.454939	0.0927145	0.206702	-0.568501	0.218543	0.110949	0.400931	1	0.728515	0.253426	0.994195
BnaCnng23650D	106389840	auxin-responsive protein SAUR72	AT3G12830.1		SAUR-like auxin-responsive protein family	K14488	auxin signaling	-1.11671	-0.367257	-0.136635	-0.306282	-0.0757608	0.773277	0.00744959	0.504054	0.961266	0.561846	0.923506	0.370576
BnaCnng63120D	106399452	auxin-responsive protein SAUR72	AT3G12830.1		SAUR-like auxin-responsive protein family	K14488	auxin signaling	-1.50734	-0.761978	-0.467463	-1.14453	-1.22356	1.08912	0.000504901	0.126304	0.774471	0.0115204	0.00698197	0.400401
BnaA05g26360D	106452367	auxin-responsive protein SAUR72-like	AT3G12830.1		SAUR-like auxin-responsive protein family	K14488	auxin signaling	-2.60054	0.166111	-0.123434	-0.794082	-0.149751	1.2326	0.00498343	0.921402	1	0.4534	0.928978	0.504113
BnaA09g38680D	106413837	auxin-responsive protein SAUR36	AT3G60690.1		SAUR-like auxin-responsive protein family	K14488	auxin signaling	1.27146	-0.716972	0.241841	0.848451	-0.711044	0.0303913	0.0397593	0.343179	0.9335	0.215741	0.329072	1
BnaC08g30850D	106413837	auxin-responsive protein SAUR36	AT3G60690.1		SAUR-like auxin-responsive protein family	K14488	auxin signaling	0.835955	-0.347489	0.427949	1.24692	-0.68056	0.725044	0.0341222	0.493843	0.644432	0.00153974	0.114538	0.362296
BnaA04g01170D	106449087	auxin-responsive protein SAUR36	AT3G60690.1		SAUR-like auxin-responsive protein family	K14488	auxin signaling	-0.434485	-0.401162	0.35519	-0.385862	-0.848384	0.50695	0.167418	0.267857	0.57119	0.276231	0.00732893	0.424962
BnaC04g22040D	111205282	auxin-responsive protein SAUR36-like	AT3G60690.1		SAUR-like auxin-responsive protein family	K14488	auxin signaling	-0.769652	-0.464518	0.160153	-1.22253	-0.613369	0.761941	0.0359122	0.298136	0.908693	0.00076585	0.133464	0.217923
BnaC08g31820D	106414059	auxin-responsive protein SAUR32-like	AT3G61900.1		SAUR-like auxin-responsive protein family	K14488	auxin signaling	-0.0169185	0.37369	0.225967	0.364041	0.0765281	0.789917	0.982755	0.36743	0.872738	0.351942	0.894341	0.270912
BnaA09g39470D	106365107	auxin-responsive protein SAUR32	AT3G61900.1		SAUR-like auxin-responsive protein family	K14488	auxin signaling	-1.70549	0.245972	0.486563	-1.79443	-0.937752	0.535	0.000373092	0.736417	0.687663	0.000321592	0.0855176	0.719423
BnaCnng01670D	106426672	auxin-responsive protein SAUR32-like	AT4G00880.1		SAUR-like auxin-responsive protein family	K14488	auxin signaling	-2.5143	-1.8964	-0.557371	-2.68872	-2.51535	-0.0542697	8.19738e-12	6.88458e-07	0.406045	5.70817e-13	2.21659e-11	1
BnaA03g24040D	111214606	auxin-induced protein 15A-like	AT4G09530.1		SAUR-like auxin-responsive protein family	K14488	auxin signaling	-0.448761	-0.662326	-0.0543269	-2.01421	-0.274487	0.0701503	0.626639	0.420533	1	0.0031615	0.760235	1
BnaC03g28590D	106443742	auxin-induced protein 15A	AT4G09530.1		SAUR-like auxin-responsive protein family	K14488	auxin signaling	-2.04231	-1.17836	-0.0336158	-2.01566	-7.29342	0.11199	0.134994	0.441798	1	0.365031	0.000873607	1
BnaC03g29520D	106385728	auxin-responsive protein SAUR36-like	AT4G12410.1		SAUR-like auxin-responsive protein family	K14488	auxin signaling	-2.65932	-2.72023	0.126286	-2.36117	-1.59846	0.393031	0.0293132	0.0331006	1	0.0594538	0.222902	0.952051
BnaA09g20970D	106405008	auxin-responsive protein SAUR36-like	AT4G12410.1		SAUR-like auxin-responsive protein family	K14488	auxin signaling	-2.83047	-1.19902	0.849742	-1.78608	-1.73316	-5.12796	2.60139e-05	0.0986584	0.787349	0.0147531	0.0139272	0.0825882
BnaCnng22170D	106417909	auxin-responsive protein SAUR36	AT4G12410.1		SAUR-like auxin-responsive protein family	K14488	auxin signaling	-2.86418	-0.10636	2.24071	-2.24277	-1.53265	2.54328	0.0314431	0.951877	0.641965	0.00619033	0.0786766	0.248114
BnaA03g25090D	106443823	auxin-responsive protein SAUR36	AT4G12410.1		SAUR-like auxin-responsive protein family	K14488	auxin signaling	-3.85303	-3.22996	3.38251	-4.16183	-4.74731	-0.0581253	7.48033e-05	1.68763e-06	0.366184	0.0104467	4.41842e-09	1
BnaCnng72960D	106443414	auxin-responsive protein SAUR36-like	AT4G22620.1		SAUR-like auxin-responsive protein family	K14488	auxin signaling	0.236759	-0.145337	-1.04748	1.00799	-1.23026	0.254263	0.784122	0.912874	0.523256	0.171479	0.135383	0.986067
BnaA01g12340D	106374674	auxin-responsive protein SAUR36	AT4G22620.1		SAUR-like auxin-responsive protein family	K14488	auxin signaling	0.0408433	-0.407056	-1.14777	0.540297	-0.531665	-0.653408	0.968161	0.596291	0.163359	0.424922	0.452066	0.640774
BnaA08g10360D	106443414	auxin-responsive protein SAUR36-like	AT4G22620.1		SAUR-like auxin-responsive protein family	K14488	auxin signaling	-6.20839	-1.27055	-0.739041	-3.98922	-3.27896	0.436819	6.51032e-05	0.395515	0.837995	0.00629073	0.0137201	0.962675
BnaC07g43240D	106420555	uncharacterized protein LOC106420555	AT4G31320.1		SAUR-like auxin-responsive protein family	K14488	auxin signaling	0.255563	0.00027738	3.09256	-0.0679926	-0.456412	-0.55204	0.765329	1	0.448838	0.969983	0.605362	0.941796
BnaA01g05940D	106357387	auxin-responsive protein SAUR72	AT4G31320.1		SAUR-like auxin-responsive protein family	K14488	auxin signaling	-0.175995	0.303962	-2.2651	0.394915	0.785546	2.51759	0.71875	0.572523	0.638434	0.399793	0.069255	0.625479
BnaA03g51410D	106409836	auxin-responsive protein SAUR63-like	AT4G31320.1		SAUR-like auxin-responsive protein family	K14488	auxin signaling	-0.650702	-0.652142	-2.2981	-1.23875	-0.669335	0.0079224	0.126923	0.212151	0.638434	0.00336287	0.184829	1
BnaC01g07200D	106374240	auxin-responsive protein SAUR72	AT4G31320.1		SAUR-like auxin-responsive protein family	K14488	auxin signaling	-1.95056	-0.471858	-0.0022635	-1.37168	-0.509316	-0.00956337	0.000170398	0.513074	1	0.0130996	0.454159	1
BnaA01g02430D	106434719	auxin-responsive protein SAUR50-like	AT4G34750.1		SAUR-like auxin-responsive protein family	K14488	auxin signaling	-1.63098	-1.47385	-0.384234	-1.26835	-2.1542	-0.628483	2.77026e-06	0.000102054	0.826447	0.000599186	1.49357e-08	0.596402
BnaC01g03680D	106374198	auxin-responsive protein SAUR50	AT4G34750.1		SAUR-like auxin-responsive protein family	K14488	auxin signaling	-2.81792	-2.53887	-0.717847	-1.52149	-2.61757	-1.18491	1.32358e-07	5.37325e-06	0.541622	0.00894167	4.69302e-06	0.318659
BnaC07g45220D	111207685	auxin-responsive protein SAUR50-like	AT4G34760.1		SAUR-like auxin-responsive protein family	K14488	auxin signaling	-2.09208	-1.65255	-0.363093	-2.06238	-2.36925	-1.09455	7.25188e-05	0.00358949	0.762285	0.000318522	2.73105e-05	0.172503
BnaA01g02420D	106370522	auxin-responsive protein SAUR50	AT4G34760.1		SAUR-like auxin-responsive protein family	K14488	auxin signaling	-2.35853	-2.1594	-0.585898	-1.72037	-2.80111	-0.780372	1.4801e-07	5.67133e-06	0.516515	0.000186614	2.69398e-09	0.370844
BnaA03g58660D	106370226	auxin-responsive protein SAUR50	AT4G34760.1		SAUR-like auxin-responsive protein family	K14488	auxin signaling	-2.75114	-1.33669	-0.114083	-2.14504	-1.6181	-0.0348624	4.60932e-09	0.00718629	0.987157	7.15667e-06	0.000782933	1
BnaA08g10970D	106370226	auxin-responsive protein SAUR50	AT4G34760.1		SAUR-like auxin-responsive protein family	K14488	auxin signaling	-2.75114	-1.33669	-0.114082	-2.14504	-1.6181	-0.0348625	4.60932e-09	0.00718629	0.987157	7.15667e-06	0.000782933	1
BnaCnng68470D	106370226	auxin-responsive protein SAUR50	AT4G34760.1		SAUR-like auxin-responsive protein family	K14488	auxin signaling	-2.75114	-1.33669	-0.114082	-2.14504	-1.6181	-0.0348627	4.60932e-09	0.00718629	0.987157	7.15667e-06	0.000782933	1
BnaA03g53040D	106428757	auxin-responsive protein SAUR50-like	AT4G34760.1		SAUR-like auxin-responsive protein family	K14488	auxin signaling	-2.92017	-1.63068	-0.426298	-2.61701	-2.07811	-0.554485	4.97795e-07	0.00335445	0.701113	5.47575e-06	0.000164146	0.640791
BnaC01g03670D	106374197	auxin-responsive protein SAUR50-like	AT4G34760.1		SAUR-like auxin-responsive protein family	K14488	auxin signaling	-3.21762	-2.69088	0.0194147	-2.05188	-4.35388	0.166127	1.79179e-06	0.000139496	1	0.00288791	2.80182e-09	0.984951
BnaUnng01620D	106434720	auxin-induced protein 15A-like	AT4G34770.1		SAUR-like auxin-responsive protein family	K14488	auxin signaling	-0.014503	0.0113064	0.0566317	1.85426	0.0221386	0.0160967	1	1	1	0.375389	1	1
BnaA01g02400D	106434726	auxin-responsive protein SAUR21	AT4G34790.1		SAUR-like auxin-responsive protein family	K14488	auxin signaling	8.2485	8.6098	-2.49594	6.39902	6.78628	-2.2333	1.43653e-17	2.21645e-14	0.433232	3.60641e-14	3.76701e-14	0.725771
BnaC01g03660D	106374192	auxin-responsive protein SAUR20	AT4G34790.1		SAUR-like auxin-responsive protein family	K14488	auxin signaling	-1.78955	2.79343	-1.57074	2.00193	1.37202	-1.7169	0.327557	0.196158	0.758233	0.180168	0.448386	0.625529
BnaA01g02390D	106434722	auxin-induced protein 15A	AT4G34800.1		SAUR-like auxin-responsive protein family	K14488	auxin signaling	0.555942	1.85356	0.0271122	0.525507	2.34636	-3.52599	0.306067	0.000792157	1	0.377822	1.33791e-05	0.427061
BnaC03g65770D	106421787	auxin-induced protein X15-like	AT4G34800.1		SAUR-like auxin-responsive protein family	K14488	auxin signaling	0.383009	2.09879	-1.27116	3.82544	-0.355776	-0.0419115	0.835731	0.1839	0.791167	0.015772	0.874466	1
BnaC01g03650D	106374191	auxin-induced protein X15	AT4G34800.1		SAUR-like auxin-responsive protein family	K14488	auxin signaling	0.288642	0.552268	-1.49075	-0.555102	1.74269	-0.453981	0.770645	0.624004	0.490953	0.617248	0.0643613	0.967999
BnaC07g45260D	111208283	auxin-responsive protein SAUR21-like	AT4G34800.1		SAUR-like auxin-responsive protein family	K14488	auxin signaling	-2.23733	-0.354682	0.447605	-4.09573	-0.248094	-0.0866685	0.00760954	0.767858	0.973008	0.000580793	0.846781	1
BnaA03g53060D	106428758	auxin-responsive protein SAUR21-like	AT4G34800.1		SAUR-like auxin-responsive protein family	K14488	auxin signaling	-2.36563	0.0151298	0.0306959	-1.67297	-0.486053	-0.702629	8.74867e-08	0.996892	1	0.00111738	0.384754	0.793063
BnaC01g03640D	106375294	auxin-induced protein 15A-like	AT4G34810.1		SAUR-like auxin-responsive protein family	K14488	auxin signaling	1.6204	0.822072	0.31475	-0.170217	1.81993	2.57328	0.0296718	0.407442	0.982	0.888643	0.0225554	0.625479
BnaA01g02380D	106434733	auxin-induced protein 15A-like	AT4G34810.1		SAUR-like auxin-responsive protein family	K14488	auxin signaling	0.542028	1.06375	-0.0010619	0.197373	3.36365	2.5453	0.530239	0.332348	1	0.869202	0.000568312	0.62673
BnaC07g45270D	111207497	auxin-responsive protein SAUR20-like	AT4G34810.1		SAUR-like auxin-responsive protein family	K14488	auxin signaling	-0.936961	-1.02651	-3.15012	-1.44704	-1.53721	-0.414384	0.168222	0.189314	0.43471	0.0453963	0.0543558	0.990199
BnaC08g11390D	106427827	auxin-responsive protein SAUR50-like	AT4G36110.1	SAUR9	SAUR-like auxin-responsive protein family	K14488	auxin signaling	3.54057	3.06102	-0.562561	3.97311	3.49615	-1.10282	1.86917e-06	0.000351969	0.831096	1.81573e-07	1.29537e-05	0.625437
BnaA08g14810D	106359873	auxin-responsive protein SAUR50	AT4G36110.1	SAUR9	SAUR-like auxin-responsive protein family	K14488	auxin signaling	1.23186	1.48822	1.16969	2.57222	2.89748	-0.299984	0.0803399	0.068329	0.445138	0.000367675	0.000194876	0.952051
BnaA01g01490D	106446855	auxin-responsive protein SAUR50-like	AT4G36110.1	SAUR9	SAUR-like auxin-responsive protein family	K14488	auxin signaling	-0.0475645	-0.872656	1.10432	-1.30417	-0.350212	-1.4975	0.983336	0.459358	0.638434	0.317017	0.814001	0.522262
BnaA06g37320D	106349482	auxin-induced protein X15-like	AT4G38840.1		SAUR-like auxin-responsive protein family	K14488	auxin signaling	1.53896	1.41334	-0.117737	-0.148243	1.15699	0.0175971	0.00114917	0.00564013	0.941622	0.877555	0.0931591	1
BnaC07g47570D	106408637	auxin-induced protein X15] [partial	AT4G38840.1		SAUR-like auxin-responsive protein family	K14488	auxin signaling	0.00854711	1.64291	-0.0887258	-0.153123	1.47599	-0.867789	1	0.328835	0.992768	0.964561	0.387426	0.243279
BnaA06g37310D	106409242	LOW QUALITY PROTEIN: auxin-responsive protein SAUR15] [transl_except	AT4G38850.1	SAUR15	SAUR-like auxin-responsive protein family	K14488	auxin signaling	3.00115	3.36818	-4.17958	0.0245937	0.0113818	-0.0773421	0.0848916	0.110707	0.247627	1	1	1
BnaA06g37300D	106408977	auxin-responsive protein SAUR50-like	AT4G38860.1		SAUR-like auxin-responsive protein family	K14488	auxin signaling	-0.00835684	0.00729452	0.268942	0.0158761	0.0068296	-0.0123061	1	1	0.829971	1	1	1
BnaC07g47550D	106408977	auxin-responsive protein SAUR50-like	AT4G38860.1		SAUR-like auxin-responsive protein family	K14488	auxin signaling	-0.0119972	0.0103514	-0.184996	0.0289808	0.0122342	-0.617649	1	1	0.888415	1	1	0.363299
BnaA01g05190D	106444916	auxin-responsive protein SAUR50	AT4G38860.1		SAUR-like auxin-responsive protein family	K14488	auxin signaling	-0.433593	0.159243	0.408928	-1.65742	-5.67632	-0.0608318	0.481608	0.875094	0.510482	0.033892	1.69338e-05	1
BnaC01g00010D	106438746	auxin-responsive protein SAUR50	AT4G38860.1		SAUR-like auxin-responsive protein family	K14488	auxin signaling	-2.23432	-1.59849	-0.0656981	-4.5961	-1.8616	0.0030469	0.0002627	0.0141203	0.996977	4.16529e-07	0.0109268	1
BnaC09g45540D	106370664	auxin-responsive protein SAUR50	AT5G10990.1		SAUR-like auxin-responsive protein family	K14488	auxin signaling	-0.697341	-0.730958	0.00928062	-1.85569	-0.128051	1.77403	0.178023	0.215196	1	0.00594737	0.91522	0.761809
BnaA10g21430D	106370664	auxin-responsive protein SAUR50	AT5G10990.1		SAUR-like auxin-responsive protein family	K14488	auxin signaling	-1.91519	-0.580626	0.0144095	-1.77763	-1.11916	-0.470623	0.000439575	0.393487	1	0.00136	0.0512915	0.967977
BnaC03g08700D	106385115	auxin-responsive protein SAUR19	AT5G18010.1	SAUR19	SAUR-like auxin-responsive protein family	K14488	auxin signaling	-0.622441	-0.14385	6.03491	-0.171906	-0.117711	-6.99501	0.638868	1	0.207117	1	1	0.20302
BnaC02g07870D	106380786	auxin-responsive protein SAUR21-like	AT5G18010.1	SAUR19	SAUR-like auxin-responsive protein family	K14488	auxin signaling	-1.45939	0.0253391	0.423	-1.55423	0.248847	0.621931	0.42968	1	0.957951	0.46919	0.955318	0.909796
BnaA03g06800D	106433626	auxin-responsive protein SAUR19	AT5G18010.1	SAUR19	SAUR-like auxin-responsive protein family	K14488	auxin signaling	-1.85363	0.0163035	0.131247	0.0198415	0.250523	-0.333604	0.293004	1	0.949613	1	0.927408	0.751685
BnaA02g03870D	111211760	auxin-responsive protein SAUR21-like	AT5G18020.1	SAUR20	SAUR-like auxin-responsive protein family	K14488	auxin signaling	0.0124638	1.24669	0.672375	-0.0219251	-2.88328	-6.23606	1	0.853188	1	1	0.560254	0.655269
BnaA02g03950D	106432493	auxin-responsive protein SAUR21-like	AT5G18020.1	SAUR20	SAUR-like auxin-responsive protein family	K14488	auxin signaling	0.0121377	-0.0153398	-1.407	0.00856741	0.00046907	-7.38418	1	1	0.889948	1	1	0.489517
BnaC02g07860D	106380780	auxin-responsive protein SAUR21-like	AT5G18020.1	SAUR20	SAUR-like auxin-responsive protein family	K14488	auxin signaling	-0.0286534	0.0271235	0.443887	-1.7148	0.217085	-0.830151	1	1	0.973576	0.44821	0.963783	0.88699
BnaA03g06860D	106445316	auxin-responsive protein SAUR21-like	AT5G18030.1		SAUR-like auxin-responsive protein family	K14488	auxin signaling	5.78884	5.81291	-0.389534	1.66751	5.04231	-3.32481	0.000647567	0.00291024	0.982	0.420434	0.00919576	0.53085
BnaC03g08750D	106385120	auxin-responsive protein SAUR21	AT5G18030.1		SAUR-like auxin-responsive protein family	K14488	auxin signaling	3.86147	-2.39692	-0.094283	1.6351	0.215138	-1.38073	0.0162114	0.268334	1	0.38037	0.957568	0.554881
BnaA03g06850D	106443176	auxin-responsive protein SAUR21	AT5G18030.1		SAUR-like auxin-responsive protein family	K14488	auxin signaling	3.6373	2.446	1.00504	3.05989	0.00981789	-0.266172	0.013704	0.235983	0.221726	0.0971813	1	0.896336
BnaA03g06880D	106385121	auxin-responsive protein SAUR21	AT5G18030.1		SAUR-like auxin-responsive protein family	K14488	auxin signaling	1.07684	1.42824	0.464418	2.56735	0.0122139	-0.864053	0.450038	0.344692	0.66099	0.18809	1	0.771813
BnaC03g08780D	106385121	auxin-responsive protein SAUR21	AT5G18030.1		SAUR-like auxin-responsive protein family	K14488	auxin signaling	1.02327	-2.92319	0.606319	3.27045	-0.0232798	-0.252365	0.602319	0.170519	0.873638	0.0919165	1	1
BnaA02g03930D	106432492	auxin-responsive protein SAUR21-like	AT5G18030.1		SAUR-like auxin-responsive protein family	K14488	auxin signaling	0.230211	-3.11322	-0.163363	-0.010919	-0.00913296	-7.31346	0.939361	0.179678	1	1	1	0.0306397
BnaC03g08730D	106443173	auxin-responsive protein SAUR21	AT5G18030.1		SAUR-like auxin-responsive protein family	K14488	auxin signaling	0.0722898	-0.0663341	0.597887	-0.0920783	-1.628	-1.30242	1	1	0.852017	1	0.47605	0.572823
BnaC02g34500D	106380779	auxin-responsive protein SAUR21-like	AT5G18030.1		SAUR-like auxin-responsive protein family	K14488	auxin signaling	0.0582971	-0.0549989	0.87224	-0.00997136	-0.00926473	-2.82396	1	1	0.833331	1	1	0.308744
BnaC02g07770D	106380779	auxin-responsive protein SAUR21-like	AT5G18030.1		SAUR-like auxin-responsive protein family	K14488	auxin signaling	0.0347339	-0.0442872	0.316257	0.062876	0.0151289	1.60828	1	1	1	1	1	0.750373
BnaA10g16750D	106385310	auxin-responsive protein SAUR21	AT5G18030.1		SAUR-like auxin-responsive protein family	K14488	auxin signaling	0.0302157	-2.41034	-0.306191	-0.0402913	0.1833	-5.08727	1	0.262538	0.935072	1	0.964176	0.0031861
BnaA02g03900D	106380790	auxin-responsive protein SAUR21-like	AT5G18030.1		SAUR-like auxin-responsive protein family	K14488	auxin signaling	0.0215035	-0.0199152	-0.438351	-0.00291873	-0.00262571	-2.44323	1	1	0.90571	1	1	0.20698
BnaA10g16830D	106385304	auxin-responsive protein SAUR21	AT5G18030.1		SAUR-like auxin-responsive protein family	K14488	auxin signaling	0.0111046	-0.010913	0.320152	-2.32109	0.00613419	0.0645586	1	1	0.94411	0.26277	1	1
BnaC03g08710D	111204329	auxin-responsive protein SAUR21-like	AT5G18030.1		SAUR-like auxin-responsive protein family	K14488	auxin signaling	0.00632993	-0.00518947	0.262333	-0.0534921	-1.65034	-0.642972	1	1	0.977062	1	0.471134	0.845155
BnaA03g06840D	106443175	auxin-responsive protein SAUR24	AT5G18030.1		SAUR-like auxin-responsive protein family	K14488	auxin signaling	0.0060251	-0.00627404	0.594425	0.0262161	0.0100973	-0.0767689	1	1	0.726445	1	1	1
BnaC03g08740D	106385119	auxin-responsive protein SAUR21	AT5G18030.1		SAUR-like auxin-responsive protein family	K14488	auxin signaling	-0.00054999	-1.64769	0.840918	0.00309215	0.00126973	-0.948958	1	0.449565	0.652847	1	1	0.645224
BnaA03g06810D	106433617	auxin-responsive protein SAUR21	AT5G18030.1		SAUR-like auxin-responsive protein family	K14488	auxin signaling	-0.00333409	-1.64389	0.370335	0.010241	-2.41973	-0.107986	1	0.44535	0.812659	1	0.271243	1
BnaA02g03940D	111211762	auxin-responsive protein SAUR21-like	AT5G18030.1		SAUR-like auxin-responsive protein family	K14488	auxin signaling	-0.00334564	-1.89748	-1.79609	1.96712	-2.88442	-0.998177	1	0.518004	0.843919	0.47223	0.430305	0.963004
BnaC02g07890D	106380787	auxin-responsive protein SAUR21-like	AT5G18030.1		SAUR-like auxin-responsive protein family	K14488	auxin signaling	-0.00378597	0.00372742	0.555309	-0.00366591	-0.00121719	-0.209549	1	1	0.929829	1	1	1
BnaA02g03890D	106432494	auxin-responsive protein SAUR21	AT5G18030.1		SAUR-like auxin-responsive protein family	K14488	auxin signaling	-0.01043	0.00984357	0.573653	-0.0429668	1.95113	-3.8467	1	1	0.959965	1	0.405391	0.321136
BnaC02g07830D	106380777	auxin-responsive protein SAUR21-like	AT5G18030.1		SAUR-like auxin-responsive protein family	K14488	auxin signaling	-0.0141788	-1.6403	0.219256	-3.3446	-3.69807	0.466401	1	0.47312	1	0.135565	0.116844	0.962481
BnaC09g52070D	106380787	auxin-responsive protein SAUR21-like	AT5G18030.1		SAUR-like auxin-responsive protein family	K14488	auxin signaling	-0.0221593	0.0194431	0.191354	0.0412056	0.0175317	-0.0327733	1	1	1	1	1	1
BnaA10g16840D	106387762	auxin-responsive protein SAUR20	AT5G18030.1		SAUR-like auxin-responsive protein family	K14488	auxin signaling	-0.0287156	-2.45179	-0.134672	-1.6358	-3.92484	-0.698191	1	0.244326	1	0.433268	0.0411694	0.720132
BnaC02g07800D	106380790	auxin-responsive protein SAUR21-like	AT5G18030.1		SAUR-like auxin-responsive protein family	K14488	auxin signaling	-0.05751	0.0492203	1.04045	-1.58065	0.0232837	0.761006	1	1	0.763044	0.460811	1	0.859357
BnaA10g16800D	106385307	auxin-responsive protein SAUR21	AT5G18030.1		SAUR-like auxin-responsive protein family	K14488	auxin signaling	-1.42313	-0.707961	0.20586	-1.66916	-1.66255	-1.02882	0.412257	0.770772	0.964081	0.427569	0.463231	0.464111
BnaAnng36540D	106432506	auxin-responsive protein SAUR21	AT5G18030.1		SAUR-like auxin-responsive protein family	K14488	auxin signaling	-2.15998	-3.26693	1.01309	-0.0331455	-3.25916	-0.705757	0.229458	0.0987212	0.620786	1	0.118016	0.840557
BnaA10g16790D	106385308	auxin-responsive protein SAUR21	AT5G18030.1		SAUR-like auxin-responsive protein family	K14488	auxin signaling	-2.16609	1.6553	-0.0652588	0.00501732	0.00184851	-1.06308	0.222978	0.441566	1	1	1	0.417504
BnaA10g16780D	106385309	auxin-responsive protein SAUR21-like	AT5G18030.1		SAUR-like auxin-responsive protein family	K14488	auxin signaling	-2.94533	0.00469613	0.176905	-1.67209	-0.00066326	-2.02133	0.0839535	1	0.981502	0.427548	1	0.113349
BnaA10g16770D	106387766	auxin-responsive protein SAUR21	AT5G18060.1	SAUR23	SAUR-like auxin-responsive protein family	K14488	auxin signaling	7.54785	6.38379	-0.0834953	6.75767	4.92304	-3.06799	1.34189e-07	8.66248e-05	1	1.39424e-05	0.000494409	0.57105
BnaC09g39790D	106426153	auxin-responsive protein SAUR21-like	AT5G18060.1	SAUR23	SAUR-like auxin-responsive protein family	K14488	auxin signaling	3.88775	3.53721	-0.929618	1.89657	3.17852	-1.81322	0.0105232	0.0602746	0.678055	0.349446	0.10368	0.415916
BnaC02g07810D	106380785	auxin-responsive protein SAUR21-like	AT5G18060.1	SAUR23	SAUR-like auxin-responsive protein family	K14488	auxin signaling	1.60852	0.022392	0.012541	0.0118281	-2.45266	0.658636	0.359257	1	1	1	0.306992	0.885154
BnaA10g16740D	106385311	auxin-responsive protein SAUR21	AT5G18060.1	SAUR23	SAUR-like auxin-responsive protein family	K14488	auxin signaling	0.189612	-1.65427	0.429358	-0.0183623	-2.40111	-1.03436	0.943093	0.446605	0.820529	1	0.279648	0.455651
BnaC03g08720D	106443172	auxin-responsive protein SAUR21	AT5G18060.1	SAUR23	SAUR-like auxin-responsive protein family	K14488	auxin signaling	0.086933	-0.0795426	1.90288	-0.0437567	-0.025711	-1.68805	1	1	0.383376	1	1	0.492674
BnaA02g03910D	106432486	auxin-responsive protein SAUR21-like	AT5G18060.1	SAUR23	SAUR-like auxin-responsive protein family	K14488	auxin signaling	0.0530954	-0.053464	-0.52642	-0.0331938	-1.02652	-7.49022	1	1	0.934741	1	0.652322	0.100059
BnaAnng37150D	106432486	auxin-responsive protein SAUR21-like	AT5G18060.1	SAUR23	SAUR-like auxin-responsive protein family	K14488	auxin signaling	0.0530953	-0.0534639	-0.526419	-0.0331937	-1.02652	-7.49022	1	1	0.934741	1	0.652322	0.100059
BnaA02g03880D	106432498	auxin-responsive protein SAUR21-like	AT5G18060.1	SAUR23	SAUR-like auxin-responsive protein family	K14488	auxin signaling	0.0500258	-0.0500734	-0.500393	-1.60151	-3.05228	-4.68937	1	1	0.954171	0.470888	0.223292	0.138029
BnaA03g06820D	106443172	auxin-responsive protein SAUR21	AT5G18060.1	SAUR23	SAUR-like auxin-responsive protein family	K14488	auxin signaling	0.0261261	-0.0246714	-0.14144	0.0145507	0.00404964	-2.80865	1	1	1	1	1	0.164644
BnaC09g39840D	106426148	auxin-responsive protein SAUR21	AT5G18060.1	SAUR23	SAUR-like auxin-responsive protein family	K14488	auxin signaling	0.0209251	-1.67705	0.471006	-1.65094	-2.85955	-0.234102	1	0.441861	0.762945	0.427666	0.171557	0.958783
BnaA02g26400D	106421741	auxin-responsive protein SAUR21-like	AT5G18060.1	SAUR23	SAUR-like auxin-responsive protein family	K14488	auxin signaling	0.0170921	-0.0159383	-0.30073	0.0137858	0.00455633	0.3319	1	1	0.783619	1	1	0.80208
BnaC02g34510D	106421741	auxin-responsive protein SAUR21-like	AT5G18060.1	SAUR23	SAUR-like auxin-responsive protein family	K14488	auxin signaling	-0.00811465	0.00714602	-1.4296	0.0121645	1.87522	-0.348963	1	1	0.449119	1	0.382068	0.925939
BnaC02g07790D	106432494	auxin-responsive protein SAUR21	AT5G18060.1	SAUR23	SAUR-like auxin-responsive protein family	K14488	auxin signaling	-0.0253006	1.65602	-0.446441	0.0127827	0.00622443	0.463495	1	0.4636	0.9621	1	1	0.955756
BnaC03g08760D	106385277	auxin-responsive protein SAUR21	AT5G18060.1	SAUR23	SAUR-like auxin-responsive protein family	K14488	auxin signaling	-0.0471978	-2.87022	-0.309154	0.0520303	0.0221222	-1.13571	1	0.175502	0.974119	1	1	0.725771
BnaC02g07750D	106380777	auxin-responsive protein SAUR21-like	AT5G18060.1	SAUR23	SAUR-like auxin-responsive protein family	K14488	auxin signaling	-0.0557971	-1.51771	0.800917	-3.25967	-2.34664	1.28109	1	0.489736	0.830423	0.135544	0.326836	0.713079
BnaAnng36550D	106432490	auxin-responsive protein SAUR23-like	AT5G18060.1	SAUR23	SAUR-like auxin-responsive protein family	K14488	auxin signaling	-1.07914	-1.08352	0.996329	-0.0829624	-0.0390349	-5.28968	0.587145	0.605216	0.703748	1	1	0.0230223
BnaC09g39850D	106426146	auxin-responsive protein SAUR20	AT5G18060.1	SAUR23	SAUR-like auxin-responsive protein family	K14488	auxin signaling	-1.08045	-2.96874	0.313639	-0.827069	-3.77184	-0.899404	0.252262	0.00190613	0.850217	0.490347	0.00110226	0.429417
BnaA03g06830D	106443173	auxin-responsive protein SAUR21	AT5G18060.1	SAUR23	SAUR-like auxin-responsive protein family	K14488	auxin signaling	-1.47499	-2.86093	0.316863	1.79194	0.00908884	-0.0909145	0.401936	0.1449	0.782528	0.379399	1	1
BnaC09g52080D	106380792	auxin-responsive protein SAUR21-like	AT5G18060.1	SAUR23	SAUR-like auxin-responsive protein family	K14488	auxin signaling	-1.86862	-1.01514	0.708063	-0.00021093	-1.66009	0.358449	0.305258	0.621162	0.739023	1	0.4679	0.936107
BnaC09g39410D	106380792	auxin-responsive protein SAUR21-like	AT5G18060.1	SAUR23	SAUR-like auxin-responsive protein family	K14488	auxin signaling	-1.86862	-1.01514	0.708063	-0.0002109	-1.66009	0.358449	0.305258	0.621162	0.739023	1	0.4679	0.936107
BnaC02g07740D	106380776	auxin-responsive protein SAUR21	AT5G18060.1	SAUR23	SAUR-like auxin-responsive protein family	K14488	auxin signaling	-3.23973	-1.25228	0.131801	-4.42995	-1.4037	0.616634	0.101008	0.603844	1	0.038698	0.493219	0.917233
BnaC02g07850D	106380776	auxin-responsive protein SAUR21	AT5G18060.1	SAUR23	SAUR-like auxin-responsive protein family	K14488	auxin signaling	-4.89399	-2.71664	0.0333807	-3.77108	-2.4586	0.494085	0.0133496	0.214189	1	0.085473	0.232891	0.953803
BnaA10g16820D	106385305	auxin-responsive protein SAUR21	AT5G18080.1	SAUR24	SAUR-like auxin-responsive protein family	K14488	auxin signaling	1.63113	-0.726177	-0.488744	-1.67391	1.00098	-0.92722	0.337527	0.769626	0.847872	0.428557	0.654582	0.629916
BnaA10g16810D	106385306	auxin-responsive protein SAUR21-like	AT5G18080.1	SAUR24	SAUR-like auxin-responsive protein family	K14488	auxin signaling	0.00978302	-0.00903968	0.203107	0.00058372	-0.00036469	-1.43313	1	1	0.989842	1	1	0.522515
BnaC02g07820D	106380780	auxin-responsive protein SAUR21-like	AT5G18080.1	SAUR24	SAUR-like auxin-responsive protein family	K14488	auxin signaling	-0.0271761	0.0252016	-0.242957	0.00330125	0.00259392	0.466007	1	1	1	1	1	0.958288
BnaA10g14730D	106371710	auxin-responsive protein SAUR71	AT5G20810.1		SAUR-like auxin-responsive protein family	K14488	auxin signaling	-1.26936	-0.256085	0.00420446	-1.11471	0.355749	-1.36675	0.0063843	0.708012	1	0.0221427	0.520113	0.727797
BnaC09g37090D	111211730	auxin-responsive protein SAUR50-like	AT5G20810.1		SAUR-like auxin-responsive protein family	K14488	auxin signaling	-2.26338	-0.519414	0.0107154	-2.25262	-1.09042	-0.0284714	8.05527e-06	0.35815	1	2.58605e-06	0.0126363	1
BnaCnng73150D	106386292	auxin-responsive protein SAUR72	AT5G50760.1		SAUR-like auxin-responsive protein family	K14488	auxin signaling	1.78991	1.12681	0.0196834	1.52983	1.85146	-2.18623	0.000105588	0.034751	1	0.00134613	0.000119302	0.725771
BnaC03g16420D	106386527	auxin-responsive protein SAUR72-like	AT5G50760.1		SAUR-like auxin-responsive protein family	K14488	auxin signaling	1.32277	0.941011	0.046671	2.2763	1.861	-0.0547197	0.0514845	0.245257	1	0.000479397	0.00492687	1
BnaC03g27910D	111212918	auxin-responsive protein SAUR71-like	AT5G50760.1		SAUR-like auxin-responsive protein family	K14488	auxin signaling	0.140262	0.273009	2.26761	0.0903863	0.695579	3.36357	0.750485	0.57896	0.638434	0.873136	0.0696383	0.40894
BnaA03g23520D	106386855	auxin-responsive protein SAUR71	AT5G50760.1		SAUR-like auxin-responsive protein family	K14488	auxin signaling	-0.162268	0.631807	-0.0091024	0.203676	1.58257	2.49968	0.775126	0.277352	1	0.734449	0.000556748	0.62673
BnaC02g44790D	106380960	auxin-responsive protein SAUR32-like	AT5G53590.1		SAUR-like auxin-responsive protein family	K14488	auxin signaling	0.916332	-0.989857	-0.558928	-1.07454	-0.960725	0.50123	0.151301	0.155772	0.664161	0.0986367	0.159847	0.743064
BnaA10g06890D	106371281	auxin-responsive protein SAUR32-like	AT5G53590.1		SAUR-like auxin-responsive protein family	K14488	auxin signaling	0.464628	-0.48473	0.16944	-0.808337	-0.782486	-0.189245	0.2055	0.253291	0.882437	0.0555154	0.073819	0.880974
BnaC09g29950D	106416521	auxin-responsive protein SAUR32-like	AT5G53590.1		SAUR-like auxin-responsive protein family	K14488	auxin signaling	-0.195006	-0.50189	0.389058	-0.803854	-0.619326	0.12231	0.77126	0.453167	0.714667	0.198979	0.337824	0.981671
BnaA02g10190D	106390689	auxin-responsive protein SAUR32	AT5G53590.1		SAUR-like auxin-responsive protein family	K14488	auxin signaling	-1.71749	-0.684526	1.56908	-2.27164	-4.06856	-1.32895	0.111156	0.634064	0.420872	0.0670467	0.00108057	0.583934
BnaC03g14890D	106416521	auxin-responsive protein SAUR32-like	AT5G53590.1		SAUR-like auxin-responsive protein family	K14488	auxin signaling	-2.18131	-1.90891	0.0333959	-2.44541	-0.384301	-2.2012	0.00426455	0.0186186	1	0.00378742	0.682654	0.725771

## Sheet: BR
ID	KEGG_ID	HitDesc	AGI	symbol	description	KEGG_Ath	pathway	logFC Root_H4h_AV	logFC Root_H24h_AV	logFC Leaf_H24h_AV	logFC Root_H4h_ZS	logFC Root_H24h_ZS	logFC Leaf_H24h_ZS	FDR Root_H4h_AV	FDR Root_H24h_AV	FDR Leaf_H24h_AV	FDR Root_H4h_ZS	FDR Root_H24h_ZS	FDR Leaf_H24h_ZS
BnaA09g31290D	106405681	cytochrome P450 90B1-like isoform X2	AT3G50660.1	DWF4	Cytochrome P450 superfamily protein	K09587	BR biosynthesis	0.294795	0.383162	0.708959	1.65863	1.46183	0.43196	0.730603	0.715974	0.606879	0.0156815	0.0463228	0.822414
BnaC01g23810D	106447365	cytochrome P450 90B1 isoform X5	AT3G50660.1	DWF4	Cytochrome P450 superfamily protein	K09587	BR biosynthesis	-1.60619	-0.331715	0.496249	-1.6665	0.333061	0.426361	2.30136e-05	0.519168	0.498774	2.30537e-05	0.49665	0.625479
BnaA01g35580D	106447365	cytochrome P450 90B1 isoform X3	AT3G50660.1	DWF4	Cytochrome P450 superfamily protein	K09587	BR biosynthesis	-2.31011	-0.251376	0.280628	-1.7789	-0.284286	0.395312	9.74322e-20	0.459549	0.60811	3.88287e-12	0.377193	0.427061
BnaC09g49790D	106440690	cytochrome P450 90A1-like isoform X2	AT5G05690.1	CPD	Cytochrome P450 superfamily protein	K09588	BR biosynthesis	1.31281	1.23729	0.505047	1.08354	0.965022	0.119419	0.000632252	0.00308319	0.524141	0.00683258	0.0215846	0.970015
BnaC02g02210D	106380838	cytochrome P450 90A1	AT5G05690.1	CPD	Cytochrome P450 superfamily protein	K09588	BR biosynthesis	0.453411	-0.500536	0.573062	0.33225	0.0373992	1.57538	0.750712	0.773437	0.872675	0.848032	1	0.495956
BnaA10g24860D	106419352	cytochrome P450 90A1	AT5G05690.1	CPD	Cytochrome P450 superfamily protein	K09588	BR biosynthesis	0.443269	0.838104	0.866046	0.223374	0.378988	0.168838	0.254211	0.0335391	0.103066	0.639538	0.393677	0.903798
BnaAnng01430D	106422628	cytochrome P450 90A1-like	AT5G05690.3	CPD	Cytochrome P450 superfamily protein	K09588	BR biosynthesis	-0.31468	-0.1195	0.449312	0.336504	-0.555678	0.0646849	0.575416	0.87678	0.573927	0.550817	0.285425	1
BnaAnng01440D	106422628	cytochrome P450 90A1-like	AT5G05690.2	CPD	Cytochrome P450 superfamily protein	K09588	BR biosynthesis	-0.318886	0.0456204	0.588048	0.965478	0.035165	0.197652	0.635014	0.970338	0.434232	0.0868735	0.982602	0.892756
BnaA04g21780D	106447426	steroid 5-alpha-reductase DET2-like	AT2G38050.1	DET2	3-oxo-5-alpha-steroid 4-dehydrogenase family protein	K09591	BR biosynthesis	-0.370308	0.381123	0.713577	-0.979229	-0.462962	0.135211	0.41038	0.466142	0.510746	0.0188534	0.344316	0.983729
BnaC04g45630D	106406145	steroid 5-alpha-reductase DET2	AT2G38050.1	DET2	3-oxo-5-alpha-steroid 4-dehydrogenase family protein	K09591	BR biosynthesis	-1.01138	-0.324696	-0.0796025	-0.767983	-0.34694	0.169632	0.000228396	0.367474	0.969915	0.00614876	0.292126	0.856398
BnaA01g01320D	106369862	3-epi-6-deoxocathasterone 23-monooxygenase	AT4G36380.1	ROT3	Cytochrome P450 superfamily protein	K12637	BR biosynthesis	-0.290486	0.813396	2.29443	-0.716944	-0.229029	-0.0219039	0.59494	0.127521	0.638434	0.145097	0.719322	1
BnaAnng19730D	106451959	3-epi-6-deoxocathasterone 23-monooxygenase	AT4G36380.1	ROT3	Cytochrome P450 superfamily protein	K12637	BR biosynthesis	-1.60449	-0.422039	1.06352	-1.67313	-0.968513	-0.227007	1.43886e-06	0.312287	0.555626	2.14394e-06	0.00859063	1
BnaC07g51130D	106409581	3-epi-6-deoxocathasterone 23-monooxygenase-like	AT4G36380.1	ROT3	Cytochrome P450 superfamily protein	K12637	BR biosynthesis	-1.70096	-0.346171	0.862805	-1.43554	-0.605938	0.195249	2.47199e-05	0.528657	0.638434	0.000619029	0.207349	0.994792
BnaA01g37200D	106350972	3-epi-6-deoxocathasterone 23-monooxygenase-like	AT3G13730.1	CYP90D1	cytochrome P450, family 90, subfamily D, polypeptide 1	K12638	BR biosynthesis	-0.632052	0.423287	0.655007	-1.68442	0.837305	0.525935	0.178703	0.457204	0.443627	0.000106069	0.0787761	0.589271
BnaC05g50440D	106350972	3-epi-6-deoxocathasterone 23-monooxygenase-like	AT3G13730.1	CYP90D1	cytochrome P450, family 90, subfamily D, polypeptide 1	K12638	BR biosynthesis	-1.64422	1.617	-0.393604	-3.08049	-0.434785	-1.15307	0.192688	0.292682	0.9599	0.0176579	0.804425	0.699199
BnaA05g25680D	106452300	3-epi-6-deoxocathasterone 23-monooxygenase-like	AT3G13730.1	CYP90D1	cytochrome P450, family 90, subfamily D, polypeptide 1	K12638	BR biosynthesis	-3.04365	0.86635	-0.997434	-3.6399	0.416849	0.590409	2.69232e-10	0.117215	0.28716	1.19124e-12	0.500299	0.617741
BnaC05g39590D	106440615	3-epi-6-deoxocathasterone 23-monooxygenase-like	AT3G13730.2	CYP90D1	cytochrome P450, family 90, subfamily D, polypeptide 1	K12638	BR biosynthesis	-3.8011	0.591449	0.536493	-2.39394	0.402339	0.582187	0.000208874	0.617323	0.820313	0.00807843	0.732828	0.794563
BnaC04g34330D	106449738	cytochrome P450 85A1 isoform X1	AT5G38970.1	BR6OX1	brassinosteroid-6-oxidase 1	K09590	BR biosynthesis	-1.37965	-2.25522	-0.474487	-1.53533	-2.40135	-0.0270583	0.223787	0.0800934	0.910256	0.211133	0.0550848	1
BnaA04g11490D	106449738	cytochrome P450 85A1 isoform X2	AT5G38970.3	BR6OX1	brassinosteroid-6-oxidase 1	K09590	BR biosynthesis	-1.93356	-0.194918	1.56923	-1.5103	0.00083333	0.565216	0.00283806	0.854609	0.0800524	0.0146004	1	0.693809
BnaC04g34320D	106449738	cytochrome P450 85A1 isoform X1	AT5G38970.1	BR6OX1	brassinosteroid-6-oxidase 1	K09590	BR biosynthesis	-2.31638	-0.426363	0.559188	-1.57557	-1.02419	0.15503	8.05506e-06	0.53269	0.544148	0.0036727	0.0778487	0.95981
BnaAnng21530D	106397123	cytochrome P450 85A2-like	AT3G30180.1	BR6OX2	brassinosteroid-6-oxidase 2	K12640	BR biosynthesis	-1.46906	-0.795536	-0.416675	-2.59931	-0.0673086	0.427078	0.00793526	0.174802	0.707977	3.25788e-06	0.946978	0.722133
BnaC02g38080D	106411244	cytochrome P450 85A2-like	AT3G30180.1	BR6OX2	brassinosteroid-6-oxidase 2	K12640	BR biosynthesis	-1.49638	-2.87913	0.017779	-0.918523	0.489827	-0.0189367	0.395062	0.145618	1	0.222102	0.478493	1
BnaC07g25950D	106410432	cytochrome P450 85A2-like	AT3G30180.1	BR6OX2	brassinosteroid-6-oxidase 2	K12640	BR biosynthesis	-2.04065	0.540732	-0.126206	-1.66803	-0.27457	-0.41886	6.16313e-08	0.201173	0.910658	0.000104304	0.571971	0.498889
BnaA06g30720D	106349108	cytochrome P450 85A2-like	AT3G30180.1	BR6OX2	brassinosteroid-6-oxidase 2	K12640	BR biosynthesis	-2.51556	-0.424288	0.0308355	-1.59632	-0.672463	-0.235956	7.04837e-14	0.270648	1	1.55737e-06	0.0530028	0.751727
BnaC04g17240D	106365615	cytochrome P450 734A1-like	AT2G26710.1	BAS1	Cytochrome P450 superfamily protein	K15639	BR biosynthesis	-1.43098	-1.48654	0.658021	-1.75903	-1.95151	-1.32425	0.000495392	0.000901751	0.465062	0.000329925	0.000245836	0.184481
BnaA07g12890D	106358460	cytochrome P450 734A1	AT2G26710.1	BAS1	Cytochrome P450 superfamily protein	K15639	BR biosynthesis	-2.05168	-1.96296	0.358288	-2.44262	-1.47887	-0.55036	1.16025e-05	0.000115015	0.840049	8.55685e-07	0.00423614	0.705733
BnaA01g03510D	106438526	BRASSINOSTEROID INSENSITIVE 1-associated receptor kinase 1-like][protein_id	AT4G33430.1	BAK1	BRI1-associated receptor kinase	K13416	BR signaling	0.856766	0.343268	0.258989	0.586377	0.472512	0.0596752	1.64151e-05	0.1621	0.575536	0.00587658	0.0365291	0.985118
BnaC03g66580D	106361098	BRASSINOSTEROID INSENSITIVE 1-associated receptor kinase 1-like][protein_id	AT4G33430.1	BAK1	BRI1-associated receptor kinase	K13416	BR signaling	0.848827	0.449143	0.466614	1.01261	0.629889	0.449496	0.0018664	0.177147	0.520083	0.000265454	0.0383557	0.577472
BnaA08g11770D	106405819	BRASSINOSTEROID INSENSITIVE 1-associated receptor kinase 1-like][protein_id	AT4G33430.1	BAK1	BRI1-associated receptor kinase	K13416	BR signaling	0.549365	0.17512	0.324463	0.730014	0.629608	-0.0142196	0.0562619	0.667541	0.637521	0.0123548	0.0407998	1
BnaC01g04780D	106368734	BRASSINOSTEROID INSENSITIVE 1-associated receptor kinase 1	AT4G33430.1	BAK1	BRI1-associated receptor kinase	K13416	BR signaling	0.457761	0.160441	0.279164	0.454922	0.213735	0.250935	0.0170624	0.536499	0.448838	0.022499	0.36484	0.574713
BnaC07g44250D	106411181	BRASSINOSTEROID INSENSITIVE 1-associated receptor kinase 1	AT4G33430.1	BAK1	BRI1-associated receptor kinase	K13416	BR signaling	0.28063	0.0324372	0.267064	0.23134	0.0674136	0.132886	0.233296	0.942112	0.606084	0.375877	0.847743	0.876699
BnaA03g52520D	106376693	BRASSINOSTEROID INSENSITIVE 1-associated receptor kinase 1-like isoform X2	AT4G33430.1	BAK1	BRI1-associated receptor kinase	K13416	BR signaling	-0.235472	-0.456224	0.240115	-0.178602	-0.259468	0.0873427	0.340007	0.0693092	0.640101	0.521529	0.335632	0.948648
BnaA05g12570D	106351012	protein BRASSINOSTEROID INSENSITIVE 1-like	AT4G39400.1	BRI1	Leucine-rich receptor-like protein kinase family protein	K13415	BR signaling	0.666061	0.0354452	0.587164	-1.45721	-1.38629	0.593679	0.553645	1	0.476706	0.272988	0.440835	0.500177
BnaA06g40640D	106349513	protein BRASSINOSTEROID INSENSITIVE 1 precursor] [exception	AT4G39400.1	BRI1	Leucine-rich receptor-like protein kinase family protein	K13415	BR signaling	0.271161	-0.113159	0.735986	0.17815	-0.472831	0.339581	0.445555	0.822988	0.0947809	0.67473	0.195942	0.635039
BnaC01g40660D	106439014	protein BRASSINOSTEROID INSENSITIVE 1-like	AT4G39400.1	BRI1	Leucine-rich receptor-like protein kinase family protein	K13415	BR signaling	-0.17638	0.293984	0.784245	-0.219877	0.437893	-0.0725318	0.691393	0.552869	0.198205	0.65495	0.332795	1
BnaA01g05490D	106351012	protein BRASSINOSTEROID INSENSITIVE 1-like	AT4G39400.1	BRI1	Leucine-rich receptor-like protein kinase family protein	K13415	BR signaling	-0.241867	0.593147	0.00687456	-0.674593	0.138406	-0.0154971	0.423999	0.0448031	1	0.016178	0.720261	1
BnaC03g60590D	106361506	protein BRASSINOSTEROID INSENSITIVE 1-like	AT4G39400.1	BRI1	Leucine-rich receptor-like protein kinase family protein	K13415	BR signaling	-0.623512	-0.495014	-0.654864	-1.21892	-0.481763	0.156302	0.0443533	0.167563	0.147277	7.69557e-05	0.178375	0.891231
BnaA08g16520D	106361506	protein BRASSINOSTEROID INSENSITIVE 1-like	AT4G39400.1	BRI1	Leucine-rich receptor-like protein kinase family protein	K13415	BR signaling	-0.758898	-0.0906893	0.115088	-0.559861	-0.00430911	-0.0786231	0.00102785	0.812073	0.887502	0.024363	1	0.960348
BnaC07g47240D	106410294	protein BRASSINOSTEROID INSENSITIVE 1	AT4G39400.1	BRI1	Leucine-rich receptor-like protein kinase family protein	K13415	BR signaling	-1.30073	-0.45482	0.955206	-1.00335	-0.553214	0.2967	0.000116972	0.287001	0.0383774	0.00468258	0.164343	0.73677
BnaA02g23290D	106430401	BRI1 kinase inhibitor 1-like	AT5G42750.1	BKI1	BRI1 kinase inhibitor 1	K14499	BR signaling	-2.70618	-1.45032	-0.142384	-3.24686	-1.42754	-0.0519402	5.22081e-07	0.0114437	0.972316	4.43154e-08	0.0108158	1
BnaC02g28720D	106446381	BRI1 kinase inhibitor 1-like	AT5G42750.1	BKI1	BRI1 kinase inhibitor 1	K14499	BR signaling	-3.36164	-1.50094	0.256191	-3.36248	-1.47425	0.224642	3.24247e-13	0.00039646	0.776313	2.20812e-13	0.00059379	0.839296
BnaCnng02180D	106365531	probable serine/threonine-protein kinase At5g41260	AT4G00710.2	BSK3	BR-signaling kinase 3	K14500	BR signaling	-0.0141075	-0.655801	0.235723	0.0152095	1.77216	-0.00947839	0.980572	0.865505	1	1	0.478173	1
BnaA03g27020D	106388721	probable serine/threonine-protein kinase At5g41260	AT4G00710.2	BSK3	BR-signaling kinase 3	K14500	BR signaling	-1.00702	-0.522888	-0.128724	-0.756249	-0.866422	0.182936	1.0353e-05	0.0489305	0.872005	0.00170043	0.000416141	0.801136
BnaC03g32000D	106388721	probable serine/threonine-protein kinase At5g41260	AT4G00710.2	BSK3	BR-signaling kinase 3	K14500	BR signaling	-1.35815	-0.768971	0.385751	-1.28016	-1.24099	0.222727	1.02981e-06	0.013434	0.52414	7.48509e-06	1.89095e-05	0.80324
BnaA09g51800D	106365531	probable serine/threonine-protein kinase At5g41260	AT4G00710.2	BSK3	BR-signaling kinase 3	K14500	BR signaling	-1.49048	0.0439755	1.85046	-0.581525	-0.307912	-0.0681894	0.00109488	0.968808	0.0137253	0.270906	0.617133	1
BnaA01g08850D	106427202	probable serine/threonine-protein kinase At4g35230	AT5G46570.1	BSK2	BR-signaling kinase 2	K14500	BR signaling	1.61763	1.3927	-0.0172383	1.24706	0.403961	0.22984	1.87905e-10	1.33343e-07	1	9.60834e-06	0.227021	0.739413
BnaC09g19500D	106410389	probable serine/threonine-protein kinase At4g35230	AT5G46570.1	BSK2	BR-signaling kinase 2	K14500	BR signaling	1.43777	0.960188	0.380875	1.07996	0.450342	0.59681	0.0113769	0.157287	0.507154	0.340752	0.681749	0.244713
BnaC01g10520D	106391868	probable serine/threonine-protein kinase At4g35230] [partial	AT5G46570.1	BSK2	BR-signaling kinase 2	K14500	BR signaling	0.357765	0.709604	0.0573811	0.786906	0.767391	0.230848	0.186849	0.00725865	0.982	0.00219324	0.00330815	0.715038
BnaA06g35930D	106400831	probable serine/threonine-protein kinase At4g35230	AT5G46570.1	BSK2	BR-signaling kinase 2	K14500	BR signaling	-0.797468	-0.370074	0.100644	-0.782355	-0.345022	-0.0391376	0.000525812	0.199105	0.924933	0.00105743	0.231704	1
BnaC07g19260D	106410389	probable serine/threonine-protein kinase At4g35230	AT5G46570.1	BSK2	BR-signaling kinase 2	K14500	BR signaling	-0.906633	-0.985536	0.203161	-1.04375	-1.34705	-0.139554	0.000133055	0.000108558	0.719971	1.34859e-05	3.26363e-08	0.866652
BnaC03g65340D	106434640	probable serine/threonine-protein kinase At4g35230 isoform X1	AT4G35230.1	BSK1	BR-signaling kinase 1	K14500	BR signaling	1.23722	0.730925	0.0171899	1.38241	0.805167	0.198066	1.74622e-06	0.0151358	1	1.31056e-07	0.00531428	0.810323
BnaA08g10790D	106421807	probable serine/threonine-protein kinase At4g35230 isoform X1	AT4G35230.1	BSK1	BR-signaling kinase 1	K14500	BR signaling	1.20174	0.906731	0.47815	0.936821	0.805266	0.181607	2.01625e-06	0.00176632	0.323758	0.000363609	0.00483157	0.833206
BnaC01g03320D	106375264	probable serine/threonine-protein kinase At4g35230	AT4G35230.1	BSK1	BR-signaling kinase 1	K14500	BR signaling	0.375721	-0.0409871	0.0810857	0.516292	-0.123691	0.120808	0.0607321	0.910175	0.924012	0.00963202	0.643068	0.852321
BnaA01g02190D	106453426	probable serine/threonine-protein kinase At4g35230	AT4G35230.1	BSK1	BR-signaling kinase 1	K14500	BR signaling	0.341831	-0.20393	0.13366	0.332315	-0.403547	0.158691	0.131755	0.474335	0.833132	0.20271	0.124271	0.830008
BnaA10g00260D	106370846	probable serine/threonine-protein kinase BSK3 isoform X1	AT1G01740.2	BSK4	kinase with tetratricopeptide repeat domain-containing protein	K14500	BR signaling	-0.573911	-0.17805	-0.150871	-0.577104	0.197043	-0.318627	0.084296	0.711692	0.900428	0.179375	0.701783	0.774316
BnaC05g00340D	106358380	probable serine/threonine-protein kinase BSK3 isoform X2	AT1G01740.2	BSK4	kinase with tetratricopeptide repeat domain-containing protein	K14500	BR signaling	-1.08117	-0.529223	0.10357	-1.59006	-0.64431	-0.283105	1.30464e-05	0.0627841	0.927106	2.53156e-08	0.0324795	0.723161
BnaC06g01500D	106389098	probable serine/threonine-protein kinase At5g41260 isoform X2	AT1G63500.1	BSK7	kinase with tetratricopeptide repeat domain-containing protein	K14500	BR signaling	1.5101	0.557973	-0.448017	1.33285	0.410257	0.0229857	0.00506861	0.502558	0.702511	0.0235519	0.623251	1
BnaCnng43070D	106358549	probable serine/threonine-protein kinase At5g41260	AT1G63500.1	BSK7	kinase with tetratricopeptide repeat domain-containing protein	K14500	BR signaling	0.108725	-0.00201577	0.0633937	0.357162	0.204521	-0.149532	0.727901	1	0.981114	0.199703	0.519552	0.865993
BnaAnng28860D	106366515	probable serine/threonine-protein kinase At5g41260	AT1G63500.1	BSK7	kinase with tetratricopeptide repeat domain-containing protein	K14500	BR signaling	0.0287773	-0.0926416	-0.0592179	0.284654	0.149992	0.38994	0.940781	0.811914	0.98721	0.317767	0.652417	0.455492
BnaC02g44820D	106389098	probable serine/threonine-protein kinase At5g41260 isoform X2	AT1G63500.1	BSK7	kinase with tetratricopeptide repeat domain-containing protein	K14500	BR signaling	-0.248866	1.01993	0.0855413	-0.0116098	-0.00481226	0.00391908	0.704532	0.141359	1	1	1	1
BnaC09g11270D	106390273	probable serine/threonine-protein kinase At5g41260	AT1G63500.1	BSK7	kinase with tetratricopeptide repeat domain-containing protein	K14500	BR signaling	-0.42366	-0.393102	-0.283395	0.0238077	-0.26659	-0.157067	0.157167	0.254584	0.644975	0.981785	0.456587	0.874328
BnaC04g54930D	106439600	probable serine/threonine-protein kinase At5g41260	AT1G63500.1	BSK7	kinase with tetratricopeptide repeat domain-containing protein	K14500	BR signaling	-0.952418	-0.277692	-0.121664	-0.581618	-0.0640071	-0.17734	6.93481e-06	0.318001	0.88654	0.011186	0.862549	0.811117
BnaA09g11010D	106450801	probable serine/threonine-protein kinase At5g41260	AT1G63500.1	BSK7	kinase with tetratricopeptide repeat domain-containing protein	K14500	BR signaling	-1.3728	-0.590383	0.396778	-0.855428	-0.446257	0.633845	0.00314092	0.309776	0.713026	0.0925679	0.449663	0.524605
BnaA01g09530D	106404220	shaggy-related protein kinase eta	AT4G18710.1	BIN2	Protein kinase superfamily protein	K14502	BR signaling	0.621463	0.304121	0.220061	0.780545	0.187534	0.139517	0.00126216	0.19793	0.615142	6.02925e-05	0.453614	0.818228
BnaAnng35300D	106415975	shaggy-related protein kinase eta	AT4G18710.1	BIN2	Protein kinase superfamily protein	K14502	BR signaling	0.278485	-0.4553	-0.038727	0.243649	-0.257569	0.183967	0.467752	0.266014	1	0.654755	0.63213	0.933309
BnaC01g11150D	106431803	shaggy-related protein kinase eta	AT4G18710.1	BIN2	Protein kinase superfamily protein	K14502	BR signaling	0.238695	0.318555	0.149421	0.305155	0.0708761	0.266662	0.275784	0.179052	0.770718	0.17368	0.820231	0.543497
BnaC03g62810D	106406307	shaggy-related protein kinase eta	AT4G18710.1	BIN2	Protein kinase superfamily protein	K14502	BR signaling	-0.0638452	0.131585	0.53373	-0.158205	-0.0780508	-0.0269247	0.817045	0.65934	0.0789612	0.547894	0.807215	1
BnaC07g50210D	106415975	shaggy-related protein kinase eta	AT4G18710.1	BIN2	Protein kinase superfamily protein	K14502	BR signaling	-0.261374	0.0110611	0.410645	0.175145	0.0886497	0.109993	0.559169	1	0.596047	0.74964	0.898859	0.972743
BnaAnng31110D	106360901	shaggy-related protein kinase eta-like	AT4G18710.1	BIN2	Protein kinase superfamily protein	K14502	BR signaling	-0.431195	-0.156332	-0.0419226	-0.183421	-0.253595	0.0547756	0.0372067	0.580508	0.995537	0.465677	0.30365	0.983677
BnaA02g17130D	106387257	protein BRASSINAZOLE-RESISTANT 1-like	AT1G75080.2	BZR1	Brassinosteroid signaling positive regulator (BZR1) family protein	K14503	BR signaling	1.10181	0.131313	-0.0701887	1.15014	1.47009	-0.436357	0.149393	0.920687	1	0.152949	0.0397252	0.904647
BnaAnng32010D	106354523	protein BRASSINAZOLE-RESISTANT 1-like	AT1G75080.2	BZR1	Brassinosteroid signaling positive regulator (BZR1) family protein	K14503	BR signaling	0.779842	0.368669	0.14966	0.815667	0.467443	0.0572478	0.0022696	0.254103	0.869936	0.00193675	0.116542	1
BnaC06g35880D	106402664	protein BRASSINAZOLE-RESISTANT 1-like	AT1G75080.2	BZR1	Brassinosteroid signaling positive regulator (BZR1) family protein	K14503	BR signaling	0.602954	0.388576	0.190249	-0.574007	0.0543668	-0.632977	0.133822	0.442878	0.902038	0.277205	0.954407	0.58809
BnaCnng34980D	106387257	protein BRASSINAZOLE-RESISTANT 1-like	AT1G75080.2	BZR1	Brassinosteroid signaling positive regulator (BZR1) family protein	K14503	BR signaling	0.125152	-0.0833185	0.312343	-0.313113	-0.152466	-0.28653	0.630242	0.813312	0.486948	0.210541	0.617245	0.63864
BnaA02g17120D	106387257	protein BRASSINAZOLE-RESISTANT 1-like	AT1G75080.2	BZR1	Brassinosteroid signaling positive regulator (BZR1) family protein	K14503	BR signaling	-0.0131227	0.881645	0.0536963	0.228292	1.14515	-0.451493	0.995818	0.105424	1	0.722069	0.0199817	0.84851
BnaA07g21900D	106353660	protein BRASSINAZOLE-RESISTANT 1	AT1G75080.2	BZR1	Brassinosteroid signaling positive regulator (BZR1) family protein	K14503	BR signaling	-0.440262	-0.464772	0.11701	-0.622869	-0.586899	-0.384971	0.0724331	0.0917164	0.894185	0.0122006	0.0239897	0.427932
BnaA09g44210D	106369090	protein BRASSINAZOLE-RESISTANT 2-like	AT1G19350.6	BES1	Brassinosteroid signaling positive regulator (BZR1) family protein	K14503	BR signaling	2.36341	1.64855	-1.55757	-1.65302	0.00522838	-0.101929	0.155192	0.440939	0.0237273	0.427365	1	1
BnaC08g36760D	106368908	protein BRASSINAZOLE-RESISTANT 2-like	AT1G19350.6	BES1	Brassinosteroid signaling positive regulator (BZR1) family protein	K14503	BR signaling	1.05777	0.50414	0.0452649	-1.13043	1.52771	1.14428	0.459065	0.813534	1	0.550903	0.406458	0.190255
BnaA08g22080D	106440770	protein BRASSINAZOLE-RESISTANT 2-like	AT1G19350.6	BES1	Brassinosteroid signaling positive regulator (BZR1) family protein	K14503	BR signaling	0.420398	0.383679	0.0879346	0.238725	0.464919	0.194379	0.183905	0.295423	0.963771	0.520915	0.172817	0.834692
BnaC08g18770D	106449393	protein BRASSINAZOLE-RESISTANT 2	AT1G19350.6	BES1	Brassinosteroid signaling positive regulator (BZR1) family protein	K14503	BR signaling	0.395238	0.251155	0.0717033	0.498862	0.256566	-0.0567862	0.20932	0.524845	0.981261	0.120379	0.490407	1
BnaA06g13620D	106346965	protein BRASSINAZOLE-RESISTANT 2	AT1G19350.6	BES1	Brassinosteroid signaling positive regulator (BZR1) family protein	K14503	BR signaling	-0.128185	0.492995	0.181528	-0.554596	-0.00182191	0.124189	0.667274	0.0707573	0.761591	0.0274489	1	0.882343
BnaA06g13460D	106400713	protein BRASSINAZOLE-RESISTANT 2	AT1G19350.6	BES1	Brassinosteroid signaling positive regulator (BZR1) family protein	K14503	BR signaling	-0.623808	-0.276375	-0.251568	-0.578696	-0.642108	-0.176273	0.00505602	0.325785	0.591501	0.0127396	0.00597334	0.766025
BnaC01g02070D	106441556	BES1/BZR1 homolog protein 2	AT4G36780.1	BEH2	BES1/BZR1 homolog 2	K14503	BR signaling	1.63141	1.77661	0.584661	3.04433	2.45219	0.440284	0.000112395	7.98051e-05	0.480175	1.4737e-12	1.91461e-08	0.679812
BnaC07g46250D	106410189	BES1/BZR1 homolog protein 2	AT4G36780.1	BEH2	BES1/BZR1 homolog 2	K14503	BR signaling	1.23471	1.22165	0.845429	1.55361	1.43185	0.851206	0.000761896	0.00220013	0.143464	2.92709e-05	0.000195514	0.178924
BnaA01g01040D	106441556	BES1/BZR1 homolog protein 2	AT4G36780.1	BEH2	BES1/BZR1 homolog 2	K14503	BR signaling	1.1432	1.66578	0.935292	1.2028	1.32703	0.664022	0.00462899	8.676e-05	0.121008	0.00372345	0.00174532	0.405883
BnaAnng18240D	111215671	BES1/BZR1 homolog protein 2-like	AT4G36780.1	BEH2	BES1/BZR1 homolog 2	K14503	BR signaling	0.8145	0.80621	0.74996	1.08494	0.794009	0.486622	0.0105162	0.0219816	0.156352	0.00071773	0.020911	0.542593
BnaA03g40910D	111211001	BES1/BZR1 homolog protein 1-like	AT3G50750.1	BEH1	BES1/BZR1 homolog 1	K14503	BR signaling	-0.732194	-0.521571	0.29658	-0.563585	-0.59295	0.285593	0.0774077	0.276948	0.674476	0.223718	0.218598	0.726385
BnaC07g50000D	106425668	BES1/BZR1 homolog protein 1	AT3G50750.1	BEH1	BES1/BZR1 homolog 1	K14503	BR signaling	-1.23841	-0.265332	0.688286	-1.47448	-1.20923	0.0700505	0.0546646	0.767724	0.426348	0.0388047	0.0868087	1
BnaC09g32750D	106431416	xyloglucan endotransglucosylase/hydrolase protein 22	AT5G57560.1	TCH4	Xyloglucan endotransglucosylase/hydrolase family protein	K14504	BR signaling	2.64707	0.571639	0.613582	2.67378	2.08018	-2.7347	0.00293872	0.65261	0.913497	0.00290109	0.0309568	0.161435
BnaC02g11480D	106429199	xyloglucan endotransglucosylase/hydrolase protein 22-like	AT5G57560.1	TCH4	Xyloglucan endotransglucosylase/hydrolase family protein	K14504	BR signaling	2.57417	0.705678	0.929315	2.94336	1.65824	-1.86403	4.26917e-05	0.378609	0.631687	4.00258e-06	0.0143363	0.16177
BnaA10g11500D	106400623	xyloglucan endotransglucosylase/hydrolase protein 22-like	AT5G57560.1	TCH4	Xyloglucan endotransglucosylase/hydrolase family protein	K14504	BR signaling	2.49005	0.614596	-0.0631214	2.58231	1.34275	-1.82731	0.000387296	0.509682	1	0.000341966	0.0869747	0.115693
BnaA02g35250D	106431416	xyloglucan endotransglucosylase/hydrolase protein 22	AT5G57560.1	TCH4	Xyloglucan endotransglucosylase/hydrolase family protein	K14504	BR signaling	2.20348	0.371602	1.05826	2.77179	0.885322	1.3079	0.00255008	0.729413	0.757597	0.000222502	0.309955	0.501144
BnaA07g11980D	106366793	cyclin-D3-2	AT5G67260.1	CYCD3;2	CYCLIN D3;2	K14505	BR signaling	-0.215092	-0.415968	0.374241	0.414546	-0.0779412	-0.24275	0.742152	0.555985	0.766925	0.512659	0.940856	0.905619
BnaC07g16080D	106394545	cyclin-D3-2	AT5G67260.1	CYCD3;2	CYCLIN D3;2	K14505	BR signaling	-0.583652	-0.656471	0.655542	-0.955497	-1.73537	-0.219079	0.244668	0.249742	0.448701	0.0592845	0.000833833	0.920809
BnaCnng64910D	106438575	cyclin-D3-1	AT4G34160.1	CYCD3;1	CYCLIN D3;1	K14505	BR signaling	-0.46476	-0.395272	0.379942	-0.551833	-0.876789	-0.829722	0.269911	0.434781	0.707208	0.208179	0.0383491	0.398765
BnaA03g50910D	106441137	cyclin-D3-1-like	AT4G34160.1	CYCD3;1	CYCLIN D3;1	K14505	BR signaling	-0.789856	-0.620039	1.69485	-0.591702	-0.737084	0.83499	0.0727998	0.231187	0.0180376	0.224469	0.131983	0.590039
BnaCnng71920D	106380654	cyclin-D3-1-like	AT4G34160.1	CYCD3;1	CYCLIN D3;1	K14505	BR signaling	-1.03376	-0.208732	1.00199	-0.590246	-1.42194	-0.126659	0.0147449	0.768143	0.186059	0.222891	0.00588433	0.998671
BnaA01g02970D	106357709	cyclin-D3-1	AT4G34160.1	CYCD3;1	CYCLIN D3;1	K14505	BR signaling	-1.24213	-0.675602	1.32288	-1.39207	-1.18679	-0.132733	0.00559812	0.210562	0.104296	0.00271396	0.0142099	0.99532
BnaC03g77070D	106380654	cyclin-D3-1-like	AT4G34160.1	CYCD3;1	CYCLIN D3;1	K14505	BR signaling	-1.26292	-0.935582	1.03002	-0.486578	-1.14044	-0.360958	0.00157841	0.0488	0.127372	0.306613	0.0180827	0.783003
BnaC07g44750D	106436714	cyclin-D3-1	AT4G34160.1	CYCD3;1	CYCLIN D3;1	K14505	BR signaling	-1.41801	-0.969939	0.853335	-1.13427	-0.941384	-0.0712374	1.79541e-06	0.00278178	0.114007	0.000271014	0.00349103	1
BnaA08g11350D	106361041	cyclin-D3-1-like	AT4G34160.1	CYCD3;1	CYCLIN D3;1	K14505	BR signaling	-2.52442	-1.51762	0.649394	-1.99779	-1.3928	-0.607076	6.3209e-07	0.00712955	0.531497	0.000115879	0.0138305	0.643856
BnaC08g21500D	106382430	cyclin-D3-3	AT3G50070.1	CYCD3;3	CYCLIN D3;3	K14505	BR signaling	0.03909	0.263538	-0.104197	-0.00430457	0.434803	-0.299634	0.919703	0.427372	0.937164	1	0.13141	0.638495
BnaA03g40720D	106444303	cyclin-D3-3	AT3G50070.1	CYCD3;3	CYCLIN D3;3	K14505	BR signaling	-0.00132108	0.163672	0.483758	-0.00386308	0.123405	-1.2802	1	0.71017	0.643341	1	0.780371	0.482431
BnaC07g31650D	106409485	cyclin-D3-3	AT3G50070.1	CYCD3;3	CYCLIN D3;3	K14505	BR signaling	-0.434339	-0.457329	0.447163	-0.412528	-0.261949	1.58926	0.195375	0.225527	0.665024	0.252499	0.51581	0.124136
BnaAnng03820D	106390877	cyclin-D3-3-like	AT3G50070.1	CYCD3;3	CYCLIN D3;3	K14505	BR signaling	-0.484986	-0.21864	-0.148871	-0.386076	-0.0882083	0.00064714	0.0659334	0.531441	0.866476	0.181332	0.82799	1
BnaA01g21120D	106448018	cyclin-D3-3-like	AT3G50070.1	CYCD3;3	CYCLIN D3;3	K14505	BR signaling	-0.995887	-0.888558	0.0108955	-0.979225	-0.858287	-0.504228	0.00269474	0.0163129	1	0.0049752	0.0191784	0.468474
BnaC01g26510D	106402828	cyclin-D3-3	AT3G50070.1	CYCD3;3	CYCLIN D3;3	K14505	BR signaling	-1.46849	-0.815481	0.898334	-1.63611	-0.147216	-0.730764	0.000235079	0.0768112	0.129523	5.83594e-05	0.814696	0.344761

## Sheet: CK
ID	KEGG_ID	HitDesc	AGI	symbol	description	KEGG_Ath	pathway	logFC Root_H4h_AV	logFC Root_H24h_AV	logFC Leaf_H24h_AV	logFC Root_H4h_ZS	logFC Root_H24h_ZS	logFC Leaf_H24h_ZS	FDR Root_H4h_AV	FDR Root_H24h_AV	FDR Leaf_H24h_AV	FDR Root_H4h_ZS	FDR Root_H24h_ZS	FDR Leaf_H24h_ZS
BnaA04g00130D	106365430	adenylate isopentenyltransferase 3, chloroplastic	AT3G63110.1	IPT3	isopentenyltransferase 3	K10760	CK metabolism	-2.12137	-1.26768	-2.75739	-2.47806	-1.35564	-1.65607	0.000794697	0.0776975	0.00584662	0.00016709	0.0468506	0.285445
BnaC04g20940D	106444949	adenylate isopentenyltransferase 3, chloroplastic	AT3G63110.1	IPT3	isopentenyltransferase 3	K10760	CK metabolism	-5.04549	-2.33662	-3.34203	-5.73908	-2.40626	-0.892919	2.61566e-12	0.000896403	0.000104121	2.81538e-08	0.00380612	0.652721
BnaCnng56440D	106413713	adenylate isopentenyltransferase 3, chloroplastic	AT3G63110.1	IPT3	isopentenyltransferase 3	K10760	CK metabolism	-5.68778	-1.60643	-0.390738	-5.41796	-2.52699	-0.0796599	1.15966e-08	0.0963099	0.899017	2.22962e-07	0.00628891	1
BnaA09g55640D	106374178	adenylate isopentenyltransferase 3, chloroplastic	AT3G63110.1	IPT3	isopentenyltransferase 3	K10760	CK metabolism	-9.44757	-1.83256	0.534829	-5.77244	-2.15666	-0.171557	5.16922e-12	0.0719828	0.857853	2.31415e-07	0.0283091	1
BnaAnng08610D	106431451	adenylate isopentenyltransferase 5, chloroplastic	AT5G19040.3	IPT5	isopentenyltransferase 5	K10760	CK metabolism	-1.11867	-0.0665383	-0.0178454	-0.60725	-1.84069	0.0366112	0.029103	0.94931	1	0.320926	0.000563568	1
BnaA10g16020D	106370472	adenylate isopentenyltransferase 5, chloroplastic	AT5G19040.3	IPT5	isopentenyltransferase 5	K10760	CK metabolism	-2.64429	-0.652313	0.0224435	-1.28698	-0.741938	-0.0109189	1.1741e-08	0.252297	1	0.00772652	0.169806	1
BnaC09g38810D	106385487	adenylate isopentenyltransferase 5, chloroplastic isoform X1	AT5G19040.3	IPT5	isopentenyltransferase 5	K10760	CK metabolism	-2.72161	-0.65584	-2.28842	-1.4223	-1.0296	2.54331	1.45445e-12	0.173979	0.638434	0.000266542	0.0155934	0.625143
BnaC02g08450D	106385904	adenylate isopentenyltransferase 5, chloroplastic	AT5G19040.3	IPT5	isopentenyltransferase 5	K10760	CK metabolism	-3.19506	-0.802265	-3.03942	-2.35112	-1.57082	0.00896368	0.00142427	0.527084	0.47391	0.0206772	0.152545	1
BnaC07g07870D	106345617	adenylate isopentenyltransferase 7, mitochondrial	AT3G23630.1	IPT7	isopentenyltransferase 7	K10760	CK metabolism	-1.2821	-0.77408	0.0142182	0.292262	-0.643275	0.0156428	0.00854807	0.157488	1	0.678908	0.267521	1
BnaA07g06300D	106356241	adenylate isopentenyltransferase 7, mitochondrial-like	AT3G23630.1	IPT7	isopentenyltransferase 7	K10760	CK metabolism	-3.20069	-1.05384	-2.27612	-1.24669	-0.920645	-0.00977292	1.44758e-05	0.208562	0.638434	0.116646	0.27028	1
BnaC02g18220D	106395095	adenylate isopentenyltransferase 1, chloroplastic	AT1G68460.1	IPT1	isopentenyltransferase 1	K10760	CK metabolism	-0.660207	-0.970904	-0.404574	0.361576	-0.0377099	-1.97618	0.143178	0.0440326	0.949618	0.546856	0.9788	0.324193
BnaC02g17200D	106379345	cytokinin hydroxylase	AT1G67110.1	CYP735A2	cytochrome P450, family 735, subfamily A, polypeptide 2	K10717	CK metabolism	-0.620413	0.013594	-4.80892	-1.43762	-1.49043	-3.56533	0.298311	1	0.0622038	0.011722	0.0139451	0.417181
BnaA02g12860D	106391900	cytokinin hydroxylase-like isoform X1	AT1G67110.1	CYP735A2	cytochrome P450, family 735, subfamily A, polypeptide 2	K10717	CK metabolism	-0.876551	-0.734226	0.0494846	-1.48855	-2.66305	-1.41561	0.131456	0.284616	1	0.00935806	5.68162e-06	0.445381
BnaC04g30890D	106429444	cytokinin hydroxylase	AT5G38450.2	CYP735A1	cytochrome P450, family 735, subfamily A, polypeptide 1	K10717	CK metabolism	-0.147901	-0.550119	-0.00430846	-1.45333	-0.53796	0.0326113	0.850697	0.517977	1	0.023512	0.577293	1
BnaC04g30880D	106429444	cytokinin hydroxylase	AT5G38450.1	CYP735A1	cytochrome P450, family 735, subfamily A, polypeptide 1	K10717	CK metabolism	-0.381224	-0.212127	-2.31445	-1.8102	-1.29057	0.065626	0.505215	0.782811	0.638434	0.000333836	0.0185672	1
BnaA04g08650D	106429444	cytokinin hydroxylase	AT5G38450.1	CYP735A1	cytochrome P450, family 735, subfamily A, polypeptide 1	K10717	CK metabolism	-0.500704	-0.510866	-0.0526424	-1.37449	-1.45876	0.0552506	0.379588	0.442542	1	0.00897423	0.00774329	1
BnaC09g36710D	106421388	cytokinin dehydrogenase 7	AT5G21482.1	CKX7	cytokinin oxidase 7	K00279	CK metabolism	-0.954936	0.276251	-0.673129	-1.85809	0.76273	-0.340755	0.25336	0.83349	0.490933	0.00593128	0.351256	0.823932
BnaA02g05340D	106384861	cytokinin dehydrogenase 7	AT5G21482.1	CKX7	cytokinin oxidase 7	K00279	CK metabolism	-1.03301	-0.611238	0.240592	0.273272	-0.945344	0.20158	0.0385473	0.30491	0.807918	0.763238	0.122072	0.872037
BnaA10g14370D	106371682	cytokinin dehydrogenase 7	AT5G21482.1	CKX7	cytokinin oxidase 7	K00279	CK metabolism	-2.83891	-1.16775	-0.685484	-3.63339	-2.00411	-0.442567	9.41872e-08	0.045811	0.352997	1.14536e-09	0.000385474	0.669263
BnaC07g50850D	106409493	cytokinin dehydrogenase 4	AT4G29740.2	CKX4	cytokinin oxidase 4	K00279	CK metabolism	1.08692	0.424229	-0.00632946	1.47789	0.972621	0.00511706	0.000519554	0.285349	1	2.34726e-06	0.00355665	1
BnaA03g49660D	106417025	cytokinin dehydrogenase 4 isoform X1	AT4G29740.2	CKX4	cytokinin oxidase 4	K00279	CK metabolism	0.408831	-0.934055	4.32873	0.709877	-1.22115	-0.0121939	0.311852	0.0222038	0.128757	0.0690917	0.0013821	1
BnaA10g28940D	106370330	cytokinin dehydrogenase 3 isoform X2	AT5G56970.1	CKX3	cytokinin oxidase 3	K00279	CK metabolism	0.00565952	-2.39684	0.395102	-0.00988017	-0.00432772	0.293982	1	0.245257	0.636427	1	1	0.772533
BnaA02g08420D	106370330	cytokinin dehydrogenase 3 isoform X2	AT5G56970.1	CKX3	cytokinin oxidase 3	K00279	CK metabolism	-1.24457	-1.43339	-1.3338	-3.00294	-2.0786	-0.569182	0.0594013	0.0453006	0.253526	0.00011095	0.00562081	0.889347
BnaC09g33450D	106417645	cytokinin dehydrogenase 3-like	AT5G56970.1	CKX3	cytokinin oxidase 3	K00279	CK metabolism	-1.45138	0.771425	0.44387	0.00669116	-1.49555	0.354275	0.404507	0.737524	0.609552	1	0.270463	0.727554
BnaCnng41060D	106374136	cytokinin dehydrogenase 3	AT5G56970.1	CKX3	cytokinin oxidase 3	K00279	CK metabolism	-2.15992	-2.00476	-0.86488	-2.56121	-2.2699	-3.54555	0.00378785	0.00613364	0.674475	0.000804893	0.00130789	0.0575003
BnaC06g36220D	106405957	cytokinin dehydrogenase 5	AT1G75450.1	CKX5	cytokinin oxidase 5	K00279	CK metabolism	-1.47561	-0.559491	0.0601721	-1.72068	-1.21995	-0.897729	0.00273641	0.353647	1	0.000769338	0.016546	0.427075
BnaAnng09190D	106415584	cytokinin dehydrogenase 5	AT1G75450.1	CKX5	cytokinin oxidase 5	K00279	CK metabolism	-1.90937	-0.668887	0.32238	-1.34269	-1.16559	0.225499	0.000162506	0.282838	0.812958	0.0117219	0.0335602	0.940269
BnaA09g40400D	106406332	cytokinin dehydrogenase 6	AT3G63440.1	CKX6	cytokinin oxidase/dehydrogenase 6	K00279	CK metabolism	-2.09596	-1.20076	-0.372052	-2.8846	-1.15744	-0.328145	1.64311e-08	0.0034619	0.585098	5.54752e-11	0.0137401	0.688012
BnaC08g32840D	106415860	cytokinin dehydrogenase 6] [transl_except	AT3G63440.1	CKX6	cytokinin oxidase/dehydrogenase 6	K00279	CK metabolism	-3.01202	-0.89163	-0.161834	-2.20654	-0.79574	0.144215	2.33871e-11	0.0755817	0.928509	1.35327e-05	0.15579	0.958111
BnaC09g49620D	106432180	UDP-glycosyltransferase 76C2	AT5G05860.1	UGT76C2	UDP-glucosyl transferase 76C2	K13493	CK metabolism	0.492071	-1.09657	-1.69931	-0.915967	-1.30655	0.5887	0.22474	0.00684842	0.0290776	0.0206833	0.000888475	0.792434
BnaA10g24690D	106419086	UDP-glycosyltransferase 76C2	AT5G05860.1	UGT76C2	UDP-glucosyl transferase 76C2	K13493	CK metabolism	0.352751	-0.31221	-0.00498106	-0.469468	-0.184008	-5.30619	0.333604	0.478374	1	0.212692	0.6973	0.0349606
BnaA10g24670D	106419002	LOW QUALITY PROTEIN: UDP-glycosyltransferase 76C1] [transl_except	AT5G05870.1	UGT76C1	UDP-glucosyl transferase 76C1	K13493	CK metabolism	2.1038	1.49955	1.44772	-0.163718	0.770617	0.642543	0.00453108	0.0769044	0.23983	0.896589	0.403222	0.764698
BnaA10g24680D	106419002	LOW QUALITY PROTEIN: UDP-glycosyltransferase 76C1] [transl_except	AT5G05870.1	UGT76C1	UDP-glucosyl transferase 76C1	K13493	CK metabolism	2.07734	1.16267	1.21368	0.502465	0.963766	0.871868	0.000709811	0.10589	0.247234	0.51248	0.190046	0.610038
BnaC09g49610D	106432224	UDP-glycosyltransferase 76C1 isoform X1	AT5G05870.1	UGT76C1	UDP-glucosyl transferase 76C1	K13493	CK metabolism	0.784689	0.285403	0.817743	-0.842404	-0.704268	0.782364	0.024273	0.549884	0.0983169	0.0197012	0.07541	0.159604
BnaC04g39280D	111212713	tRNA dimethylallyltransferase 2-like isoform X1	AT2G27760.1	IPT2	tRNAisopentenyltransferase 2	K00791	CK metabolism	0.494388	0.504591	-0.225647	0.512004	-0.0200834	-0.303571	0.156024	0.221209	0.834184	0.168363	0.992249	0.757322
BnaA04g16010D	106446741	tRNA dimethylallyltransferase 2-like	AT2G27760.1	IPT2	tRNAisopentenyltransferase 2	K00791	CK metabolism	0.158769	0.173084	0.091071	0.171039	-0.23827	-0.219894	0.530094	0.57508	0.933309	0.542148	0.39419	0.725771
BnaA02g04650D	106380719	tRNA dimethylallyltransferase 9	AT5G20040.2	IPT9	isopentenyltransferase 9	K00791	CK metabolism	1.24439	0.580221	-0.350711	0.200817	0.376379	-0.411299	0.00108442	0.203091	0.702668	0.692509	0.414969	0.642161
BnaA03g07860D	106434529	tRNA dimethylallyltransferase 9-like	AT5G20040.1	IPT9	isopentenyltransferase 9	K00791	CK metabolism	-0.347229	-0.673039	0.0598622	-0.734393	-0.506154	-0.700539	0.516098	0.240234	1	0.153343	0.386523	0.415293
BnaC03g09910D	106386723	tRNA dimethylallyltransferase 9-like	AT5G20040.1	IPT9	isopentenyltransferase 9	K00791	CK metabolism	-0.787735	-0.333803	-0.628966	-0.417638	-0.184917	-0.313148	0.218539	0.704271	0.614886	0.581884	0.845234	0.877399
BnaC07g21210D	106410863	histidine kinase 4-like isoform X3	AT2G01830.1	WOL	CHASE domain containing histidine kinase protein	K14489	CK signaling	0.53017	1.32491	-4.28286	-0.628914	-1.66069	-2.30161	0.836486	0.652617	0.638434	0.913045	0.584015	0.839358
BnaA06g34500D	106431570	histidine kinase 4 isoform X3	AT2G01830.2	WOL	CHASE domain containing histidine kinase protein	K14489	CK signaling	-0.457438	-0.781029	-2.15453	-0.577634	-1.29684	-1.92117	0.421447	0.19197	0.000595666	0.328035	0.0159455	0.00415048
BnaC07g21260D	106410863	histidine kinase 4-like isoform X2	AT2G01830.2	WOL	CHASE domain containing histidine kinase protein	K14489	CK signaling	-0.83777	-0.868753	-1.55352	-0.872428	-1.84206	-2.04769	0.208151	0.249851	0.0846635	0.213541	0.00515805	0.0184744
BnaC07g11340D	106425428	histidine kinase 3-like isoform X1	AT1G27320.1	HK3	histidine kinase 3	K14489	CK signaling	0.535749	0.392613	0.278613	0.305747	0.572051	0.356131	0.0042567	0.066264	0.423846	0.147968	0.00372164	0.293162
BnaC01g22110D	106376220	uncharacterized protein LOC106376220	AT1G27320.1	HK3	histidine kinase 3	K14489	CK signaling	0.436166	0.385064	-0.0418209	0.95643	0.487164	0.119724	0.403869	0.541476	1	0.0538676	0.397518	0.984183
BnaA07g08880D	106358089	histidine kinase 3-like] [exception	AT1G27320.1	HK3	histidine kinase 3	K14489	CK signaling	0.364064	0.257419	0.293595	0.900216	0.756959	0.193229	0.0945917	0.324232	0.445299	1.07614e-05	0.000365835	0.724479
BnaC03g44990D	106439797	histidine kinase 2-like] [exception	AT5G35750.1	HK2	histidine kinase 2	K14489	CK signaling	1.14372	0.521427	0.25754	0.592919	0.646763	0.394055	1.1598e-05	0.0966043	0.668271	0.0386284	0.0279422	0.480124
BnaA03g37960D	106439797	histidine kinase 2-like] [exception	AT5G35750.1	HK2	histidine kinase 2	K14489	CK signaling	0.301997	0.243291	0.0708817	0.527251	0.905825	0.300208	0.206852	0.400057	0.954171	0.0262572	7.39622e-05	0.552157
BnaA04g07540D	106390821	histidine kinase 2] [exception	AT5G35750.1	HK2	histidine kinase 2	K14489	CK signaling	-0.820845	-0.210235	0.397887	-0.296559	0.567776	0.921313	0.0447125	0.726093	0.663495	0.560456	0.227157	0.199548
BnaC04g29780D	106390821	histidine kinase 2] [exception	AT5G35750.1	HK2	histidine kinase 2	K14489	CK signaling	-1.8471	-0.82624	-0.265754	-1.20078	-0.633147	-0.124331	2.31917e-15	0.000972993	0.572021	3.82809e-07	0.0117883	0.876087
BnaA10g01920D	106422927	histidine-containing phosphotransfer protein 5-like	AT1G03430.1	AHP5	histidine-containing phosphotransfer factor 5	K14490	CK signaling	0.268468	0.648581	0.507338	0.310634	0.650697	-0.0593951	0.256024	0.00500256	0.222286	0.207229	0.00406289	0.99508
BnaCnng75260D	106397560	histidine-containing phosphotransfer protein 5	AT1G03430.1	AHP5	histidine-containing phosphotransfer factor 5	K14490	CK signaling	0.0373837	0.191462	0.544735	-0.159901	0.731525	-0.183368	0.943385	0.697583	0.787658	0.727176	0.0467202	0.988313
BnaA07g38280D	106356886	pseudo histidine-containing phosphotransfer protein 6	AT1G80100.1	HP6	histidine phosphotransfer protein 6	K14490	CK signaling	0.876982	0.254631	-0.0052899	0.89509	-0.65762	0.00015101	0.0834153	0.743022	1	0.101485	0.306107	1
BnaC06g43070D	106387001	pseudo histidine-containing phosphotransfer protein 6	AT1G80100.1	HP6	histidine phosphotransfer protein 6	K14490	CK signaling	-0.655533	-2.22881	-0.0293774	0.253046	-3.82693	0.0241422	0.361369	0.00293488	1	0.784192	1.13166e-05	1
BnaA03g34150D	106444048	histidine-containing phosphotransfer protein 4-like	AT3G16360.2	AHP4	HPT phosphotransmitter 4	K14490	CK signaling	11.0245	10.3998	4.54472	8.35117	11.11	3.4947	3.57924e-17	3.07626e-14	0.000113335	1.36376e-14	5.45919e-16	0.0023465
BnaC03g39610D	106356383	histidine-containing phosphotransfer protein 4-like	AT3G16360.2	AHP4	HPT phosphotransmitter 4	K14490	CK signaling	8.00582	6.36961	3.6658	6.40572	7.62217	2.34719	6.86261e-12	4.88197e-06	8.84953e-05	1.65021e-09	3.27544e-09	0.0146545
BnaC05g36960D	106345339	histidine-containing phosphotransfer protein 4-like isoform X1	AT3G16360.2	AHP4	HPT phosphotransmitter 4	K14490	CK signaling	4.29312	5.20177	3.53398	7.41907	6.722	2.89344	0.000116263	2.50712e-05	0.0129332	3.52919e-08	2.40288e-07	0.0554605
BnaA05g36880D	106345339	histidine-containing phosphotransfer protein 4-like isoform X1	AT3G16360.1	AHP4	HPT phosphotransmitter 4	K14490	CK signaling	2.54127	2.3952	3.69843	4.97134	0.0105351	4.95964	0.145629	0.263966	0.0204304	0.00317184	1	0.00216268
BnaC01g31940D	106394869	histidine-containing phosphotransfer protein 1 isoform X2	AT3G21510.1	AHP1	histidine-containing phosphotransmitter 1	K14490	CK signaling	0.66477	-1.60835	-0.554212	0.25608	-1.58932	0.109918	0.114544	0.000109826	0.821072	0.630248	0.000100147	1
BnaA01g25020D	106379214	histidine-containing phosphotransfer protein 1	AT3G21510.1	AHP1	histidine-containing phosphotransmitter 1	K14490	CK signaling	-1.14958	-2.12004	-0.120692	-0.782354	-2.39622	0.437858	0.0248541	6.60149e-05	1	0.166935	4.28491e-06	0.828351
BnaA06g30870D	106349118	histidine-containing phosphotransfer protein 2 isoform X2	AT3G29350.1	AHP2	histidine-containing phosphotransmitter 2	K14490	CK signaling	0.714684	-0.099456	0.482355	0.62199	0.036228	-0.15757	0.015746	0.839873	0.437489	0.04986	0.957437	0.909305
BnaC07g25790D	106410262	histidine-containing phosphotransfer protein 2	AT3G29350.1	AHP2	histidine-containing phosphotransmitter 2	K14490	CK signaling	0.501816	-0.0908752	0.425423	0.655935	0.0979534	0.332105	0.0236155	0.795607	0.259109	0.00332974	0.764541	0.503694
BnaA09g02590D	106365846	histidine-containing phosphotransfer protein 2-like	AT3G29350.1	AHP2	histidine-containing phosphotransmitter 2	K14490	CK signaling	-0.114104	-0.0462686	0.791602	-0.0579368	-0.0947486	-0.281059	0.844038	0.961539	0.569019	0.955555	0.906107	0.919134
BnaC09g02050D	106399414	histidine-containing phosphotransfer protein 2	AT3G29350.1	AHP2	histidine-containing phosphotransmitter 2	K14490	CK signaling	-0.238842	-0.198802	0.31472	-0.34167	-0.0768902	0.540645	0.418228	0.586447	0.628202	0.254467	0.857652	0.310372
BnaCnng32590D	106365846	histidine-containing phosphotransfer protein 2-like	AT3G29350.1	AHP2	histidine-containing phosphotransmitter 2	K14490	CK signaling	-3.70278	1.0099	3.64205	0.402618	0.201469	-2.12325	0.0468138	0.597737	0.369522	0.856734	0.945991	0.739797
BnaA04g09170D	106445952	histidine-containing phosphotransfer protein 3	AT5G39340.1	AHP3	histidine-containing phosphotransmitter 3	K14490	CK signaling	-0.599201	-0.55932	-0.0150068	-0.0872162	-0.923687	0.0848157	0.00404631	0.0151103	1	0.783528	2.09572e-05	0.932741
BnaC04g31390D	106426523	histidine-containing phosphotransfer protein 3	AT5G39340.1	AHP3	histidine-containing phosphotransmitter 3	K14490	CK signaling	-0.654589	-0.965537	-0.11447	-0.600182	-1.23311	0.0632534	0.00726928	0.000128569	0.893874	0.0191637	4.2507e-07	0.983651
BnaC06g26570D	106436806	two-component response regulator ARR11-like isoform X3	AT1G67710.1	ARR11	response regulator 11	K14491	CK signaling	-0.283553	-0.813441	-0.227589	0.572751	-0.763107	-0.0646024	0.553442	0.0721661	0.881995	0.210921	0.0898439	1
BnaA07g24890D	106436806	two-component response regulator ARR11-like isoform X3	AT1G67710.1	ARR11	response regulator 11	K14491	CK signaling	-0.315562	-0.457906	0.360317	0.312452	-0.686113	0.517654	0.375746	0.231456	0.671628	0.410231	0.0448382	0.424793
BnaA07g26610D	106454297	two-component response regulator ARR11-like	AT1G67710.1	ARR11	response regulator 11	K14491	CK signaling	-0.326697	0.446538	0.174471	-0.0457908	0.0212602	0.541062	0.275784	0.16219	0.933698	0.93241	0.980993	0.556634
BnaC06g28780D	106357138	two-component response regulator ARR11	AT1G67710.1	ARR11	response regulator 11	K14491	CK signaling	-0.977956	-0.156447	1.4035	0.229876	-0.306999	-0.523133	0.00164627	0.740689	0.013641	0.562386	0.430243	0.578288
BnaA02g25910D	106432945	two-component response regulator ARR14 isoform X1	AT2G01760.1	RR14	response regulator 14	K14491	CK signaling	2.08909	3.37335	1.36657	2.74869	3.72699	0.79322	7.75128e-10	4.37975e-22	0.000608782	3.03786e-16	4.89263e-27	0.11773
BnaC02g47760D	106432945	two-component response regulator ARR14 isoform X1	AT2G01760.1	RR14	response regulator 14	K14491	CK signaling	0.103374	1.13285	1.16357	0.609876	0.886683	0.673887	0.847687	0.00747492	0.0171236	0.160046	0.0317541	0.321026
BnaC04g56320D	106446688	two-component response regulator ARR12 isoform X1	AT2G25180.1	RR12	response regulator 12	K14491	CK signaling	0.330082	-0.0337764	0.0552908	0.353062	-0.324566	-0.166556	0.181289	0.944176	0.991546	0.174804	0.237741	0.840423
BnaA04g14760D	106446700	two-component response regulator ARR12-like isoform X1	AT2G25180.1	RR12	response regulator 12	K14491	CK signaling	-0.208683	-0.19203	0.622599	-0.030956	-0.187665	0.714163	0.541806	0.644442	0.222406	0.969505	0.637128	0.171135
BnaA05g23050D	106452072	two-component response regulator ARR1-like	AT3G16857.2	RR1	response regulator 1	K14491	CK signaling	1.04404	0.665139	0.564822	0.622743	0.779986	0.330059	1.08365e-05	0.0128655	0.150787	0.015408	0.00234527	0.575316
BnaCnng27490D	106356389	two-component response regulator ARR1	AT3G16857.2	RR1	response regulator 1	K14491	CK signaling	0.752377	1.46167	0.285997	0.107027	0.997664	0.798741	0.0346403	4.65828e-05	0.837728	0.844672	0.00567221	0.311808
BnaC05g36490D	106401571	two-component response regulator ARR1-like	AT3G16857.2	RR1	response regulator 1	K14491	CK signaling	0.608232	0.545339	1.11579	-0.0542561	0.5441	0.235958	0.0116523	0.0422115	0.000364857	0.898494	0.0375354	0.723474
BnaC03g39750D	106358153	two-component response regulator ARR1-like	AT3G16857.2	RR1	response regulator 1	K14491	CK signaling	0.203987	0.0300847	0.328145	-0.524954	0.103351	0.0753994	0.509422	0.959818	0.596377	0.0677966	0.80215	0.984626
BnaA03g34300D	106356389	two-component response regulator ARR1	AT3G16857.2	RR1	response regulator 1	K14491	CK signaling	-0.231693	0.739727	0.51862	-3.99718	0.748812	0.314111	0.678046	0.162618	0.609486	0.0166256	0.439109	1
BnaA03g34320D	106439443	two-component response regulator ARR1-like	AT3G16857.3	RR1	response regulator 1	K14491	CK signaling	-0.32607	-0.162944	0.156631	-0.632313	-0.0405274	-0.0168825	0.174435	0.606425	0.813639	0.00665666	0.927508	1
BnaC01g22100D	106376222	two-component response regulator ARR2	AT4G16110.1	RR2	response regulator 2	K14491	CK signaling	0.32829	0.173433	0.071934	0.317059	0.217435	0.366798	0.255226	0.647839	0.974119	0.303693	0.523414	0.519113
BnaA03g42350D	106440308	two-component response regulator ARR2 isoform X2	AT4G16110.1	RR2	response regulator 2	K14491	CK signaling	0.0669413	0.109784	0.33099	-0.0961292	-0.119993	0.10411	0.866394	0.810361	0.620208	0.825465	0.778243	0.954747
BnaA01g17750D	106360849	two-component response regulator ARR2-like	AT4G16110.1	RR2	response regulator 2	K14491	CK signaling	-0.336446	-0.0382827	0.499541	-0.335013	-0.254352	0.0001172	0.156169	0.930616	0.154445	0.205915	0.376996	1
BnaC07g33430D	106411444	two-component response regulator ARR2-like isoform X2	AT4G16110.1	RR2	response regulator 2	K14491	CK signaling	-0.494925	0.365452	-0.168467	-0.842519	-0.0158835	0.0207622	0.216321	0.44801	0.910099	0.0345036	1	1
BnaC07g43590D	106420511	LOW QUALITY PROTEIN: two-component response regulator ARR10-like][exception	AT4G31920.1	RR10	response regulator 10	K14491	CK signaling	0.447302	0.0392565	-0.0828133	-0.0701098	-0.448078	0.00726339	0.0384523	0.92356	0.941609	0.833058	0.0556283	1
BnaC06g09070D	106412837	two-component response regulator ARR10-like	AT4G31920.1	RR10	response regulator 10	K14491	CK signaling	-0.437391	0.567396	-0.00928713	0.44686	-0.0421747	-0.00651475	0.648417	0.624997	1	0.735866	0.998379	1
BnaA03g51830D	106420511	LOW QUALITY PROTEIN: two-component response regulator ARR10-like][exception	AT4G31920.1	RR10	response regulator 10	K14491	CK signaling	-0.755564	-0.645293	0.073226	-0.649475	-0.840548	-0.227154	0.00367461	0.0252099	0.971182	0.0174657	0.00196723	0.74881
BnaC08g14280D	106453100	two-component response regulator ARR4	AT1G10470.1	ARR4	response regulator 4	K14492	CK signaling	-0.834897	-2.13633	-2.06356	-0.961948	-2.49813	-1.44658	0.196687	0.000983362	0.00821327	0.150661	8.84351e-05	0.128684
BnaA08g25770D	106362416	two-component response regulator ARR4-like	AT1G10470.1	ARR4	response regulator 4	K14492	CK signaling	-1.47619	-2.14992	-1.50336	-2.16182	-2.89263	-1.39657	0.00467163	9.62508e-05	0.033088	5.64904e-05	1.42729e-07	0.0894195
BnaCnng49440D	106350370	two-component response regulator ARR4	AT1G10470.1	ARR4	response regulator 4	K14492	CK signaling	-1.60591	-2.40547	-1.13791	-1.48656	-2.94159	-0.727493	4.75567e-05	5.00824e-09	0.0341923	0.000240939	5.90933e-13	0.317154
BnaC05g07990D	106350402	two-component response regulator ARR4	AT1G10470.1	ARR4	response regulator 4	K14492	CK signaling	-1.79955	-2.60565	-0.0880458	-1.07576	-2.23341	-0.378253	0.000182368	2.56466e-07	1	0.0358746	7.87386e-06	0.788835
BnaC03g48210D	106346524	two-component response regulator ARR4	AT1G10470.1	ARR4	response regulator 4	K14492	CK signaling	-2.05078	-1.2272	-0.878131	-1.81484	-2.05481	-0.940741	1.46646e-07	0.00430354	0.140431	4.67761e-06	3.78028e-07	0.137119
BnaA09g48160D	106419825	two-component response regulator ARR4	AT1G10470.1	ARR4	response regulator 4	K14492	CK signaling	-2.1921	-1.96819	-1.05071	-1.05067	-3.06344	-1.26492	4.3219e-05	0.00063766	0.217066	0.0756703	9.30271e-08	0.169458
BnaA06g06240D	106350402	two-component response regulator ARR4	AT1G10470.1	ARR4	response regulator 4	K14492	CK signaling	-2.47734	-2.48565	-1.46083	-2.07637	-2.81953	-0.770312	4.30583e-07	1.4149e-06	0.0248428	2.98386e-05	2.8509e-08	0.418315
BnaA06g13210D	106361968	two-component response regulator ARR7-like	AT1G19050.1	ARR7	response regulator 7	K14492	CK signaling	0.486559	-0.674434	-1.30081	0.880671	-1.38142	-1.16697	0.497575	0.407142	0.167635	0.208877	0.0456905	0.289155
BnaC08g18570D	106431810	two-component response regulator ARR7	AT1G19050.1	ARR7	response regulator 7	K14492	CK signaling	-0.00704865	-0.46043	-1.98037	-0.0655266	-1.67078	-1.5119	1	0.520762	0.00286031	0.959726	0.00325634	0.0493099
BnaC05g14720D	106401000	two-component response regulator ARR7	AT1G19050.1	ARR7	response regulator 7	K14492	CK signaling	-0.690631	-1.0749	-1.80574	-0.594131	-2.22699	-1.60198	0.291565	0.125717	0.0197373	0.409119	0.000447037	0.0687192
BnaA08g22240D	111199848	two-component response regulator ARR7-like	AT1G19050.1	ARR7	response regulator 7	K14492	CK signaling	-0.872252	-0.863825	-2.1044	-0.221108	-1.52472	-1.46186	0.238377	0.313702	0.0204094	0.8337	0.0446772	0.201612
BnaC09g14930D	106417752	two-component response regulator ARR3	AT1G59940.2	ARR3	response regulator 3	K14492	CK signaling	0.042417	-1.70263	4.05971	0.338143	-1.31287	-2.17574	0.947749	2.30307e-05	0.189688	0.485046	0.00104957	0.725771
BnaA09g14370D	106417752	two-component response regulator ARR3	AT1G59940.2	ARR3	response regulator 3	K14492	CK signaling	-0.42786	-1.43422	-0.00288646	0.218609	-1.26786	-0.103153	0.428693	0.00557049	1	0.738647	0.0101462	1
BnaC06g35700D	106354536	two-component response regulator ARR15 isoform X1	AT1G74890.1	ARR15	response regulator 15	K14492	CK signaling	0.177896	-0.619664	-1.9454	-1.71867	-0.427065	-2.20438	0.940829	0.758975	0.361209	0.429907	0.883813	0.29962
BnaA07g31820D	106354536	two-component response regulator ARR15 isoform X1	AT1G74890.1	ARR15	response regulator 15	K14492	CK signaling	-0.846451	-1.18615	-2.79821	-0.901993	-2.14417	-1.85236	0.297977	0.175059	0.00116745	0.338736	0.026554	0.06855
BnaC06g22740D	106385213	two-component response regulator ARR15-like	AT1G74890.1	ARR15	response regulator 15	K14492	CK signaling	-2.27225	-0.287751	-1.51718	-2.3824	-3.18731	-1.30103	0.0296571	0.881222	0.0110252	0.237988	0.109706	0.25579
BnaA07g22010D	106353654	two-component response regulator ARR15-like	AT1G74890.1	ARR15	response regulator 15	K14492	CK signaling	-2.6434	-1.86248	-1.59302	-4.12258	-0.831218	-0.509948	0.191766	0.44472	0.637948	0.0666712	0.772142	0.962858
BnaC04g01500D	106422087	uncharacterized protein LOC106422087	AT2G40670.1	RR16	response regulator 16	K14492	CK signaling	0.739996	0.227352	0.768788	1.05129	0.567944	0.37513	0.0295658	0.641389	0.219329	0.00261188	0.144198	0.678799
BnaC03g22790D	106385426	two-component response regulator ARR16-like	AT2G40670.1	RR16	response regulator 16	K14492	CK signaling	-0.582228	-0.21582	2.28492	-0.575588	-0.805333	-1.29222	0.604542	0.9059	0.160636	0.600792	0.487318	0.620634
BnaA03g19150D	106443570	two-component response regulator ARR16 isoform X2	AT2G40670.1	RR16	response regulator 16	K14492	CK signaling	-2.28773	-1.77318	1.30626	-2.73871	-1.71137	-1.01273	0.0572758	0.173542	0.47044	0.0378491	0.231499	0.810994
BnaC03g23280D	106352789	two-component response regulator ARR8-like	AT2G41310.1	RR3	response regulator 3	K14492	CK signaling	3.91382	1.64069	-0.742826	3.39891	1.14083	-0.529169	1.42352e-32	6.75312e-07	0.775421	5.6409e-26	0.000589086	0.882382
BnaC04g47580D	106394624	two-component response regulator ARR8-like isoform X1	AT2G41310.1	RR3	response regulator 3	K14492	CK signaling	3.60203	1.30575	0.130387	1.95651	0.142057	-0.589361	6.46065e-09	0.0650617	0.992754	0.0018862	0.89738	0.755551
BnaA04g23810D	106431103	two-component response regulator ARR8-like	AT2G41310.1	RR3	response regulator 3	K14492	CK signaling	2.18868	0.671551	-0.767655	2.04732	0.78329	-0.544687	1.11768e-07	0.187837	0.286879	9.79112e-07	0.10278	0.618081
BnaA05g02140D	106454513	two-component response regulator ARR8-like	AT2G41310.1	RR3	response regulator 3	K14492	CK signaling	1.276	-0.0871029	-0.787368	0.886942	-0.404847	-0.248916	0.000213763	0.889767	0.650546	0.01534	0.348573	0.923484
BnaC05g21960D	106371755	calcineurin B-like protein 5	AT2G41310.1	RR3	response regulator 3	K14492	CK signaling	1.2327	1.18802	1.10563	2.56446	2.10424	0.308423	0.109133	0.164412	0.398718	0.000594223	0.0067919	0.924677
BnaC04g01810D	106394725	two-component response regulator ARR8-like	AT2G41310.1	RR3	response regulator 3	K14492	CK signaling	1.0552	0.162521	-0.608173	0.714365	-0.417364	-0.468024	4.20406e-05	0.675516	0.459948	0.0102041	0.179411	0.750373
BnaA03g19410D	106443560	two-component response regulator ARR8-like	AT2G41310.1	RR3	response regulator 3	K14492	CK signaling	0.438781	-0.269465	0.514323	0.679326	-1.0606	-0.199706	0.310589	0.624004	0.59363	0.110521	0.00950415	0.911228
BnaC01g42890D	106362751	two-component response regulator ARR5	AT3G48100.1	RR5	response regulator 5	K14492	CK signaling	-1.10693	-1.72045	-1.91603	-0.917463	-1.99484	-1.2118	0.0586881	0.00537288	0.0125136	0.145591	0.000865654	0.219504
BnaA06g16900D	106408933	two-component response regulator ARR5	AT3G48100.1	RR5	response regulator 5	K14492	CK signaling	-1.63087	-1.28709	-1.11	-1.35811	-1.8026	-1.21669	0.00848832	0.0896022	0.282077	0.0384543	0.0101267	0.238068
BnaAnng26230D	106408933	two-component response regulator ARR5	AT3G48100.1	RR5	response regulator 5	K14492	CK signaling	-1.72543	-2.42872	-1.81016	-1.45429	-2.67534	-0.766586	0.00143562	4.05299e-05	0.0131795	0.0101859	4.86206e-06	0.495557
BnaCnng67000D	106408933	two-component response regulator ARR5	AT3G48100.1	RR5	response regulator 5	K14492	CK signaling	-3.38199	-2.2429	-1.03313	-2.09316	-3.45409	-0.821294	1.04953e-09	0.000113243	0.210393	0.000148183	1.27043e-09	0.418872
BnaA06g20760D	106399484	two-component response regulator ARR5-like	AT3G48100.1	RR5	response regulator 5	K14492	CK signaling	-4.62755	-4.9489	-1.37696	-2.07983	-2.49573	0.213275	1.80601e-06	3.2404e-07	0.210668	0.0225473	0.00308286	0.97212
BnaCnng35610D	106449169	two-component response regulator ARR5	AT3G48100.1	RR5	response regulator 5	K14492	CK signaling	-4.97432	-3.38784	-0.0372292	-4.93822	-2.92785	0.810035	1.62884e-13	1.76469e-09	1	1.40746e-11	1.10699e-07	0.91461
BnaA07g17140D	106445911	two-component response regulator ARR9-like	AT3G57040.1	ARR9	response regulator 9	K14492	CK signaling	0.119006	-0.0263746	-0.184309	0.579368	0.00713142	0.355542	0.790861	0.978442	0.890915	0.120379	1	0.725771
BnaA09g36380D	106368027	two-component response regulator ARR9 isoform X1	AT3G57040.1	ARR9	response regulator 9	K14492	CK signaling	-0.524977	-0.874981	-0.536918	-0.715069	-1.18573	-0.241641	0.136603	0.018197	0.351808	0.0428444	0.000565153	0.801136
BnaCnng47460D	106445911	two-component response regulator ARR9-like	AT3G57040.1	ARR9	response regulator 9	K14492	CK signaling	-0.704509	0.0611089	0.227644	-0.584235	-1.10282	0.35532	0.157972	0.951687	0.906083	0.28445	0.0340982	0.820068
BnaC08g27970D	106412097	two-component response regulator ARR9	AT3G57040.1	ARR9	response regulator 9	K14492	CK signaling	-1.08816	-1.27246	-0.778901	-1.54817	-1.56872	-0.457852	0.0034947	0.00155061	0.216982	3.68243e-05	5.35062e-05	0.582433
BnaC04g24580D	106399318	two-component response regulator ARR9	AT3G57040.1	ARR9	response regulator 9	K14492	CK signaling	-1.86872	-1.54112	-0.105341	-1.77772	-1.9009	-0.334044	1.14039e-07	3.33412e-05	0.966259	6.74908e-07	1.6402e-07	0.725771
BnaC07g27880D	106409138	two-component response regulator ARR9-like	AT3G57040.1	ARR9	response regulator 9	K14492	CK signaling	-1.8975	0.580549	0.280503	-0.394506	0.772182	0.222419	0.0112231	0.59371	0.906829	0.70521	0.465996	0.949136
BnaA04g03000D	106449149	two-component response regulator ARR9-like	AT3G57040.1	ARR9	response regulator 9	K14492	CK signaling	-3.37765	-2.36677	-0.506878	-3.14292	-2.65007	-0.795975	4.31837e-12	1.12453e-06	0.638434	1.10289e-10	3.3012e-08	0.427061
BnaC03g51340D	106424890	two-component response regulator ARR6	AT5G62920.1	ARR6	response regulator 6	K14492	CK signaling	-2.15127	-1.62802	-2.21431	-1.5523	-2.39494	-1.49438	5.00242e-05	0.00484705	0.000934755	0.00465532	1.55488e-05	0.0546233
BnaA06g22370D	106347864	two-component response regulator ARR6	AT5G62920.1	ARR6	response regulator 6	K14492	CK signaling	-2.24596	-1.37832	-2.43688	-2.11355	-2.86454	-1.60497	0.0106441	0.180954	0.049413	0.0213407	0.00226192	0.323911

## Sheet: ethylene
ID	KEGG_ID	HitDesc	AGI	symbol	description	KEGG_Ath	pathway	logFC Root_H4h_AV	logFC Root_H24h_AV	logFC Leaf_H24h_AV	logFC Root_H4h_ZS	logFC Root_H24h_ZS	logFC Leaf_H24h_ZS	FDR Root_H4h_AV	FDR Root_H24h_AV	FDR Leaf_H24h_AV	FDR Root_H4h_ZS	FDR Root_H24h_ZS	FDR Leaf_H24h_ZS
BnaC04g08360D	106375834	S-adenosylmethionine synthase 3	AT2G36880.2	MAT3	methionine adenosyltransferase 3	K00789	ETH biosynthesis	-1.05703	-0.482578	-0.346835	-0.800157	-0.223657	-0.297191	3.74262e-05	0.116629	0.489957	0.00292502	0.512624	0.62673
BnaA03g16860D	106437889	S-adenosylmethionine synthase 3-like isoform X1	AT2G36880.2	MAT3	methionine adenosyltransferase 3	K00789	ETH biosynthesis	-1.51989	-0.758085	0.101887	-1.15698	-1.27048	-0.224488	3.57193e-07	0.0260839	0.949613	0.000180571	5.5137e-05	0.799508
BnaA05g07530D	106451085	S-adenosylmethionine synthase 3	AT2G36880.2	MAT3	methionine adenosyltransferase 3	K00789	ETH biosynthesis	-1.66002	-0.583843	-0.364216	-1.2392	-0.277128	-0.298617	7.79919e-10	0.0673568	0.497575	8.47356e-06	0.436571	0.652721
BnaC03g20310D	106451494	S-adenosylmethionine synthase 3-like	AT2G36880.2	MAT3	methionine adenosyltransferase 3	K00789	ETH biosynthesis	-1.72254	-1.13989	-0.0163523	-1.63585	-1.89441	-0.132024	8.0763e-07	0.00293871	1	4.33215e-06	1.58721e-07	0.946621
BnaA01g36920D	106451560	S-adenosylmethionine synthase 2	AT3G17390.1	MTO3	S-adenosylmethionine synthetase family protein	K00789	ETH biosynthesis	-1.059	0.0721354	0.146416	0.0410366	-0.45475	-0.654013	0.0083969	0.926312	0.937984	0.971664	0.357051	0.391923
BnaC03g39970D	106389213	S-adenosylmethionine synthase 2	AT3G17390.1	MTO3	S-adenosylmethionine synthetase family protein	K00789	ETH biosynthesis	-1.06858	-1.09471	-0.708067	-0.361661	-0.848409	-0.668894	0.00151231	0.00256484	0.170788	0.378319	0.0208212	0.25536
BnaA03g34510D	106439584	S-adenosylmethionine synthase 2	AT3G17390.1	MTO3	S-adenosylmethionine synthetase family protein	K00789	ETH biosynthesis	-1.3228	-1.22189	-0.426388	-0.529161	-0.940499	-1.25268	0.000473721	0.00296703	0.595641	0.229488	0.0234852	0.015079
BnaCnng16700D	106429018	S-adenosylmethionine synthase 2-like	AT3G17390.1	MTO3	S-adenosylmethionine synthetase family protein	K00789	ETH biosynthesis	-1.44931	-0.876854	-0.828534	-0.695811	-0.797594	-0.548171	7.8604e-06	0.0158752	0.0735028	0.0502829	0.0270972	0.378088
BnaCnng75920D	106426623	S-adenosylmethionine synthase isoform X1	AT4G01850.2	SAM-2	S-adenosylmethionine synthetase 2	K00789	ETH biosynthesis	-0.672219	-0.28116	0.631814	-0.360215	-0.30159	-0.399306	0.694295	0.910852	0.893347	0.869554	0.899147	0.970359
BnaA03g26530D	106438645	S-adenosylmethionine synthase-like	AT4G01850.2	SAM-2	S-adenosylmethionine synthetase 2	K00789	ETH biosynthesis	-0.85275	-0.182458	-0.291555	-0.425295	0.223511	-0.0730044	0.000124542	0.562905	0.515814	0.0876079	0.440056	0.964878
BnaA09g00390D	106430110	S-adenosylmethionine synthase	AT4G01850.2	SAM-2	S-adenosylmethionine synthetase 2	K00789	ETH biosynthesis	-0.866224	-0.00130636	-0.487954	-0.639703	-0.00187594	0.171186	0.00796565	1	0.406045	0.069688	1	0.883215
BnaC03g31390D	111212624	S-adenosylmethionine synthase-like	AT4G01850.2	SAM-2	S-adenosylmethionine synthetase 2	K00789	ETH biosynthesis	-0.88024	-0.186468	-0.273254	-0.555433	0.0762773	-0.328996	8.79789e-05	0.557506	0.565974	0.0216602	0.836624	0.492816
BnaC04g00410D	106395982	S-adenosylmethionine synthase 2	AT1G02500.2	SAM1	S-adenosylmethionine synthetase 1	K00789	ETH biosynthesis	-0.351713	1.2834	0.644199	0.321048	1.24591	-2.71279	0.721253	0.172297	0.73503	0.778495	0.174334	0.0219979
BnaA05g00770D	106450450	S-adenosylmethionine synthase 2	AT1G02500.2	SAM1	S-adenosylmethionine synthetase 1	K00789	ETH biosynthesis	-0.749974	0.646092	0.917226	-0.446322	0.685519	0.0001978	0.0041892	0.0268196	0.00813089	0.124037	0.0147472	1
BnaA09g07210D	106444821	1-aminocyclopropane-1-carboxylate synthase 5-like	AT5G65800.1	ACS5	ACC synthase 5	K01762	ETH biosynthesis	1.51924	2.28454	0.810532	2.10512	2.23893	0.00649958	0.000504052	4.02364e-06	0.890048	2.33623e-06	5.18112e-06	1
BnaC09g07070D	106414306	1-aminocyclopropane-1-carboxylate synthase 5-like	AT5G65800.1	ACS5	ACC synthase 5	K01762	ETH biosynthesis	-0.148188	-0.0712609	-2.28878	0.484168	1.7974	-0.480361	0.823711	0.949749	0.638434	0.429408	0.00150189	0.980223
BnaA09g21860D	106422378	1-aminocyclopropane-1-carboxylate synthase 6-like	AT4G11280.1	ACS6	1-aminocyclopropane-1-carboxylic acid (acc) synthase 6	K20772	ETH biosynthesis	-0.0403927	-0.620323	0.451306	0.498052	-0.755787	0.176401	0.957233	0.243834	0.629891	0.331364	0.128683	0.929897
BnaC09g24050D	106445177	1-aminocyclopropane-1-carboxylate synthase 6	AT4G11280.1	ACS6	1-aminocyclopropane-1-carboxylic acid (acc) synthase 6	K20772	ETH biosynthesis	-0.48359	-0.746641	0.272811	-0.0773102	-0.276533	-0.064202	0.392012	0.21857	0.868242	0.940821	0.697734	1
BnaC05g00530D	106396236	1-aminocyclopropane-1-carboxylate synthase 2	AT1G01480.1	ACS2	1-amino-cyclopropane-1-carboxylate synthase 2	K20772	ETH biosynthesis	3.02122	0.538747	-3.14149	5.75876	3.88659	3.37687	1.31629e-08	0.424105	0.436363	1.12322e-22	1.13128e-12	0.413892
BnaA10g00470D	106370875	1-aminocyclopropane-1-carboxylate synthase 2	AT1G01480.2	ACS2	1-amino-cyclopropane-1-carboxylate synthase 2	K20772	ETH biosynthesis	0.797927	-1.20585	1.01719	1.32444	-0.863922	0.450435	0.294701	0.13084	0.656804	0.0819382	0.290479	0.963271
BnaAnng12450D	106423689	1-aminocyclopropane-1-carboxylate oxidase 4	AT1G05010.1	EFE	ethylene-forming enzyme	K05933	ETH biosynthesis	1.65656	0.592931	1.08841	-0.81153	0.501428	0.524226	1.17502e-06	0.164428	0.03487	0.0260031	0.220022	0.455651
BnaC05g03040D	106401155	1-aminocyclopropane-1-carboxylate oxidase 4	AT1G05010.1	EFE	ethylene-forming enzyme	K05933	ETH biosynthesis	0.353284	-0.603804	1.08077	-0.288563	-0.0701197	0.336162	0.403506	0.172768	0.0242777	0.542603	0.921434	0.722121
BnaAnng21950D	106397796	1-aminocyclopropane-1-carboxylate oxidase 3	AT1G12010.1		2-oxoglutarate (2OG) and Fe(II)-dependent oxygenase superfamily protein	K05933	ETH biosynthesis	-1.43316	-1.73517	-0.723469	-1.02456	-1.84668	0.718468	0.0043966	0.0011915	0.568536	0.0567558	0.00042085	0.512369
BnaC08g41620D	106412278	1-aminocyclopropane-1-carboxylate oxidase 3	AT1G12010.1		2-oxoglutarate (2OG) and Fe(II)-dependent oxygenase superfamily protein	K05933	ETH biosynthesis	-1.72692	-1.62864	0.0483058	-1.2686	-1.73678	0.656844	0.000198865	0.0010814	1	0.00892194	0.000366905	0.532456
BnaCnng67880D	106400855	1-aminocyclopropane-1-carboxylate oxidase 1-like	AT2G19590.1	ACO1	ACC oxidase 1	K05933	ETH biosynthesis	8.67411	10.2522	-0.0648086	8.41396	9.79867	0.00769408	2.10248e-48	9.40919e-57	1	9.73957e-47	6.4218e-56	1
BnaCnng33000D	106376208	1-aminocyclopropane-1-carboxylate oxidase 1-like	AT2G19590.1	ACO1	ACC oxidase 1	K05933	ETH biosynthesis	6.24329	8.02576	-0.47811	6.00721	7.33575	-0.180956	1.93725e-44	1.93416e-61	0.730712	5.46874e-42	5.34553e-55	0.96246
BnaA09g44060D	106436068	1-aminocyclopropane-1-carboxylate oxidase 1	AT2G19590.1	ACO1	ACC oxidase 1	K05933	ETH biosynthesis	5.44576	4.81066	0.0567003	5.02137	4.48391	0.92332	1.20713e-29	2.63491e-24	1	2.75428e-26	1.46984e-21	0.831536
BnaC08g36640D	106365298	1-aminocyclopropane-1-carboxylate oxidase 1	AT2G19590.1	ACO1	ACC oxidase 1	K05933	ETH biosynthesis	4.41575	5.40943	0.861887	4.20813	5.71006	-3.0207	8.91272e-23	8.48189e-31	0.881428	4.39663e-21	3.25645e-33	0.562782
BnaC09g13570D	106365779	1-aminocyclopropane-1-carboxylate oxidase	AT1G62380.1	ACO2	ACC oxidase 2	K05933	ETH biosynthesis	0.992339	-0.614076	0.176526	0.255468	-1.19383	0.628498	0.0728013	0.365315	0.947481	0.7339	0.0392746	0.59827
BnaA09g13300D	106349119	1-aminocyclopropane-1-carboxylate oxidase-like	AT1G62380.1	ACO2	ACC oxidase 2	K05933	ETH biosynthesis	-1.23081	-0.798089	0.261659	-0.971363	-0.689199	0.235203	0.00140719	0.0745968	0.794254	0.0166456	0.119299	0.846741
BnaA03g60430D	111200995	1-aminocyclopropane-1-carboxylate oxidase-like	AT1G62380.1	ACO2	ACC oxidase 2	K05933	ETH biosynthesis	-2.45667	0.506636	-0.0682732	-2.36383	0.778239	0.42909	1.53172e-05	0.50825	1	4.35988e-05	0.249385	0.785969
BnaC04g19630D	106390528	1-aminocyclopropane-1-carboxylate oxidase	AT1G62380.1	ACO2	ACC oxidase 2	K05933	ETH biosynthesis	-2.75819	2.11424	-0.50741	-0.830501	1.93017	-0.246382	5.38939e-08	2.10868e-05	0.659856	0.10216	4.74206e-05	0.893524
BnaC06g38060D	106422042	1-aminocyclopropane-1-carboxylate oxidase 5	AT1G77330.1		2-oxoglutarate (2OG) and Fe(II)-dependent oxygenase superfamily protein	K05933	ETH biosynthesis	4.78638	6.20532	5.17421	0.0211323	2.08884	1.59285	0.0197235	0.0118088	0.176251	1	0.318394	0.752809
BnaAnng41480D	106353485	1-aminocyclopropane-1-carboxylate oxidase 5-like isoform X3	AT1G77330.1		2-oxoglutarate (2OG) and Fe(II)-dependent oxygenase superfamily protein	K05933	ETH biosynthesis	1.37038	2.03981	0.729094	1.70982	2.05081	-0.0460288	0.000611691	1.00288e-06	0.609535	2.54142e-05	6.76898e-07	1
BnaCnng09750D	106385998	1-aminocyclopropane-1-carboxylate oxidase 5	AT1G77330.1		2-oxoglutarate (2OG) and Fe(II)-dependent oxygenase superfamily protein	K05933	ETH biosynthesis	-1.27756	-1.09973	0.626371	0.0576359	-0.610331	0.00053303	3.73581e-05	0.0010253	0.675699	0.925532	0.0868835	1
BnaA07g33490D	106422042	1-aminocyclopropane-1-carboxylate oxidase 5	AT1G77330.1		2-oxoglutarate (2OG) and Fe(II)-dependent oxygenase superfamily protein	K05933	ETH biosynthesis	-1.41542	-0.627137	-1.54318	-1.78033	-1.50977	0.380053	0.0259109	0.439804	0.40319	0.00627704	0.0270134	0.947969
BnaA02g18450D	106422042	1-aminocyclopropane-1-carboxylate oxidase 5	AT1G77330.1		2-oxoglutarate (2OG) and Fe(II)-dependent oxygenase superfamily protein	K05933	ETH biosynthesis	-3.23558	-1.90098	-0.578288	-2.24039	-1.58167	0.913026	8.19365e-09	0.00138965	0.836975	7.01298e-05	0.00769935	0.702968
BnaC08g00620D	106424221	ethylene response sensor 2	AT1G04310.1	ERS2	ethylene response sensor 2	K14509	ETH signaling	2.35082	-0.594281	0.0149428	1.37138	-1.30774	0.630602	4.51566e-06	0.370076	1	0.0128606	0.0174986	0.611528
BnaCnng69330D	111212178	ethylene response sensor 2-like isoform X1	AT1G04310.1	ERS2	ethylene response sensor 2	K14509	ETH signaling	0.409433	-1.2913	-0.259213	0.812623	-0.676941	-0.67225	0.531866	0.0152284	0.900873	0.417273	0.317191	0.808885
BnaCnng17850D	106396643	ethylene receptor 1	AT1G66340.1	ETR1	Signal transduction histidine kinase, hybrid-type, ethylene sensor	K14509	ETH signaling	0.311147	0.180789	-0.0419874	0.452782	0.271851	0.145063	0.0867576	0.430225	0.98472	0.0122782	0.181279	0.769275
BnaA07g25770D	106397998	ethylene receptor 1 isoform X2	AT1G66340.1	ETR1	Signal transduction histidine kinase, hybrid-type, ethylene sensor	K14509	ETH signaling	-0.0753942	0.305931	0.409748	0.0261578	-0.447201	-0.952586	0.919897	0.668453	0.741784	0.998637	0.477637	0.292553
BnaC04g51810D	106450438	ethylene response sensor 1	AT2G40940.1	ERS1	ethylene response sensor 1	K14509	ETH signaling	1.63526	0.125218	0.510515	1.68163	0.236726	-1.08519	8.95012e-05	0.862765	0.652404	8.99075e-05	0.695126	0.323935
BnaA05g00430D	106450438	ethylene response sensor 1	AT2G40940.1	ERS1	ethylene response sensor 1	K14509	ETH signaling	1.56204	0.153067	0.101305	1.41502	0.106191	-0.577001	1.94843e-06	0.770283	0.981283	2.85465e-05	0.846455	0.513391
BnaC01g40040D	106445276	protein EIN4-like	AT3G04580.2	EIN4	Signal transduction histidine kinase, hybrid-type, ethylene sensor	K14509	ETH signaling	-0.0393872	0.0108362	-0.0478304	0.258792	0.0769689	-0.19673	0.907618	0.992628	0.998841	0.336265	0.830371	0.764345
BnaA01g33540D	106445275	protein EIN4-like	AT3G04580.2	EIN4	Signal transduction histidine kinase, hybrid-type, ethylene sensor	K14509	ETH signaling	-0.154756	0.128749	0.173842	-0.0461226	0.313982	0.439942	0.746478	0.833453	0.902824	0.959784	0.51478	0.627346
BnaCnng68360D	106446234	ethylene receptor 2	AT3G23150.1	ETR2	Signal transduction histidine kinase, hybrid-type, ethylene sensor	K14509	ETH signaling	4.36334	1.15474	-0.0137455	3.73808	1.25989	-2.16398	7.95394e-18	0.0320188	1	8.63631e-14	0.017147	0.725771
BnaA01g24090D	106446234	ethylene receptor 2	AT3G23150.1	ETR2	Signal transduction histidine kinase, hybrid-type, ethylene sensor	K14509	ETH signaling	3.83186	1.55217	0.00217321	3.26375	1.11928	0.00605774	9.26058e-15	0.00264756	1	3.00141e-11	0.0352232	1
BnaC06g12180D	106396528	uncharacterized protein LOC106396528 isoform X1	AT5G03730.2	CTR1	Protein kinase superfamily protein	K14510	ETH signaling	1.67127	3.90148	2.50903	-0.100434	-6.12096	-7.1597	0.382963	0.222919	0.638434	1	0.154587	0.376168
BnaCnng02610D	106430032	serine/threonine-protein kinase CTR1-like	AT5G03730.2	CTR1	Protein kinase superfamily protein	K14510	ETH signaling	0.986778	-0.429254	1.12025	0.711501	-0.328858	-0.0282506	0.263774	0.716859	0.448762	0.466926	0.783483	1
BnaC06g08660D	106396528	uncharacterized protein LOC106396528 isoform X1	AT5G03730.2	CTR1	Protein kinase superfamily protein	K14510	ETH signaling	0.909115	-0.00544644	1.01125	0.891248	0.0778093	0.296974	0.000709105	1	0.00305422	0.00115617	0.86008	0.651884
BnaA10g26380D	111204216	serine/threonine-protein kinase CTR1	AT5G03730.2	CTR1	Protein kinase superfamily protein	K14510	ETH signaling	0.685822	-0.113488	-0.417047	1.95583	0.226914	-0.498178	0.0590968	0.847603	0.573484	2.09237e-08	0.640102	0.548696
BnaC03g01380D	111204216	serine/threonine-protein kinase CTR1	AT5G03730.2	CTR1	Protein kinase superfamily protein	K14510	ETH signaling	-0.474828	-0.0467589	0.527023	-0.465057	0.00852437	0.0744412	0.0686017	0.923117	0.175386	0.0915755	1	0.973631
BnaA03g01030D	106428533	serine/threonine-protein kinase CTR1-like	AT5G03730.2	CTR1	Protein kinase superfamily protein	K14510	ETH signaling	-1.04711	-0.339508	-0.00827716	-0.176466	0.280762	-0.0306962	1.54896e-05	0.267897	1	0.594131	0.370529	1
BnaA08g01860D	106360489	mitogen-activated protein kinase kinase 4-like	AT1G51660.1	MKK4	mitogen-activated protein kinase kinase 4	K13413	ETH signaling	1.35532	0.632165	0.0073555	1.40984	0.646576	-0.30769	1.99475e-06	0.059477	1	1.25234e-06	0.0466466	0.715041
BnaC03g77890D	106427499	mitogen-activated protein kinase kinase 4-like] [exception	AT1G51660.1	MKK4	mitogen-activated protein kinase kinase 4	K13413	ETH signaling	1.09006	0.527426	0.159667	1.14903	0.416618	0.0514416	6.97913e-08	0.0235522	0.786723	2.0553e-08	0.0776424	0.994719
BnaC06g08920D	106430580	mitogen-activated protein kinase kinase 4-like	AT1G51660.1	MKK4	mitogen-activated protein kinase kinase 4	K13413	ETH signaling	0.197968	0.679895	1.31644	-0.268195	1.77959	0.718526	0.854372	0.436308	0.117991	0.804961	0.0123007	0.603769
BnaC03g41990D	106389371	mitogen-activated protein kinase kinase 5	AT3G21220.2	MKK5	MAP kinase kinase 5	K13413	ETH signaling	1.27751	0.885222	0.12107	0.0999234	0.114252	-0.0142673	0.150769	0.368775	1	0.952764	0.939303	1
BnaA03g36120D	106439662	mitogen-activated protein kinase kinase 5	AT3G21220.2	MKK5	MAP kinase kinase 5	K13413	ETH signaling	0.652625	0.547158	-0.307304	0.0319907	0.0382741	0.152113	0.0452039	0.148967	0.741573	0.987442	0.978272	0.977725
BnaC06g08910D	106430580	mitogen-activated protein kinase kinase 4-like	AT3G21220.2	MKK5	MAP kinase kinase 5	K13413	ETH signaling	0.291061	0.943615	1.30448	0.138504	1.94508	1.67322	0.877332	0.628837	0.638434	0.973538	0.278244	0.68839
BnaC01g32150D	106374862	mitogen-activated protein kinase kinase 5-like	AT3G21220.2	MKK5	MAP kinase kinase 5	K13413	ETH signaling	-1.04698	-0.90584	-0.0239453	-0.338661	-1.38164	2.58779	0.072184	0.147217	1	0.656917	0.0150324	0.622685
BnaC03g24480D	111197788	mitogen-activated protein kinase 6-like	AT2G43790.1	MPK6	MAP kinase 6	K14512	ETH signaling	1.01859	-0.0482512	0.0797606	0.665467	-0.13355	0.188065	6.71375e-07	0.90265	0.936386	0.00219746	0.653286	0.74011
BnaA03g20470D	106388342	mitogen-activated protein kinase 6-like isoform X1	AT2G43790.1	MPK6	MAP kinase 6	K14512	ETH signaling	0.292676	-0.313575	-0.378113	0.11768	-1.0553	-0.957253	0.631357	0.665676	0.773678	0.892224	0.0589989	0.30165
BnaC04g03080D	106447065	mitogen-activated protein kinase 6	AT2G43790.1	MPK6	MAP kinase 6	K14512	ETH signaling	-0.269536	-0.325292	0.449777	-0.17757	-0.526254	0.126174	0.209059	0.166602	0.140617	0.470908	0.0121111	0.847123
BnaA05g03550D	106360887	mitogen-activated protein kinase 6-like	AT2G43790.1	MPK6	MAP kinase 6	K14512	ETH signaling	-0.665495	0.369648	1.62904	-0.416562	-0.59045	0.187173	0.149369	0.527952	0.00376175	0.427003	0.248256	0.922255
BnaCnng02940D	106436021	ethylene-insensitive protein 2	AT5G03280.1	EIN2	NRAMP metal ion transporter family protein	K14513	ETH signaling	-1.17295	-0.978275	0.554254	-1.01458	-0.890258	0.215773	0.0353245	0.124213	0.638434	0.0849227	0.152141	0.93478
BnaA10g26670D	106436021	ethylene-insensitive protein 2	AT5G03280.1	EIN2	NRAMP metal ion transporter family protein	K14513	ETH signaling	-1.54152	-0.841169	-0.162347	-1.08452	-0.942587	0.0804625	9.07671e-07	0.0175434	0.881995	0.000955586	0.00595981	0.987719
BnaC01g32460D	106383008	protein ETHYLENE INSENSITIVE 3-like	AT3G20770.1	EIN3	Ethylene insensitive 3 family protein	K14514	ETH signaling	0.88535	0.500567	0.0557134	0.744426	0.590589	0.408252	0.000682528	0.104754	0.995187	0.00649276	0.0424658	0.467385
BnaA01g36840D	106383008	protein ETHYLENE INSENSITIVE 3-like	AT3G20770.1	EIN3	Ethylene insensitive 3 family protein	K14514	ETH signaling	0.832712	0.516092	0.85179	0.408735	0.435651	-0.00056891	0.00220212	0.111893	0.0337103	0.200329	0.187008	1
BnaA03g35930D	106420792	protein ETHYLENE INSENSITIVE 3-like	AT3G20770.1	EIN3	Ethylene insensitive 3 family protein	K14514	ETH signaling	0.636355	0.272882	-0.100756	0.28552	0.126325	0.00246117	0.00569177	0.357019	0.937748	0.291798	0.702243	1
BnaC03g41740D	106389350	protein ETHYLENE INSENSITIVE 3-like	AT3G20770.1	EIN3	Ethylene insensitive 3 family protein	K14514	ETH signaling	0.630845	0.331463	0.308314	0.510983	0.358507	0.199876	0.00662453	0.247532	0.510848	0.0389531	0.18845	0.751727
BnaC05g31510D	106345850	protein ETHYLENE INSENSITIVE 3-like	AT3G20770.1	EIN3	Ethylene insensitive 3 family protein	K14514	ETH signaling	0.427106	0.315507	0.214067	0.288982	0.30176	0.0357603	0.0217498	0.145233	0.590593	0.162524	0.154257	1
BnaA05g20140D	106451859	protein ETHYLENE INSENSITIVE 3-like	AT3G20770.1	EIN3	Ethylene insensitive 3 family protein	K14514	ETH signaling	0.140043	0.104129	0.0695269	0.0468661	0.120808	0.0108323	0.51601	0.702466	0.935709	0.879664	0.629991	1
BnaA03g22560D	106438416	ETHYLENE INSENSITIVE 3-like 1 protein	AT2G27050.1	EIL1	ETHYLENE-INSENSITIVE3-like 1	K14514	ETH signaling	1.24418	0.580755	0.230889	1.03709	-0.617586	-0.995074	0.0267606	0.419491	0.917815	0.0862104	0.369095	0.343962
BnaC03g26570D	106388400	ETHYLENE INSENSITIVE 3-like 1 protein	AT2G27050.1	EIL1	ETHYLENE-INSENSITIVE3-like 1	K14514	ETH signaling	0.0812915	-0.615999	0.242318	0.00409383	-0.920374	-0.0352819	0.814858	0.0330161	0.660908	1	0.000639116	1
BnaA07g39030D	106354298	ETHYLENE INSENSITIVE 3-like 3 protein	AT1G73730.1	EIL3	ETHYLENE-INSENSITIVE3-like 3	K14514	ETH signaling	0.505915	0.169116	-0.400655	0.584746	0.316963	-0.158338	0.104907	0.703356	0.493931	0.0715329	0.395256	0.88532
BnaC06g34570D	106406061	ETHYLENE INSENSITIVE 3-like 3 protein isoform X1	AT1G73730.1	EIL3	ETHYLENE-INSENSITIVE3-like 3	K14514	ETH signaling	0.49532	0.233005	-0.0843856	0.172798	0.620414	0.398082	0.230427	0.673516	0.987438	0.758908	0.168223	0.697305
BnaC06g23450D	106382951	ETHYLENE INSENSITIVE 3-like 3 protein	AT1G73730.1	EIL3	ETHYLENE-INSENSITIVE3-like 3	K14514	ETH signaling	-0.0692119	-0.290869	-0.0262595	-0.207474	-0.116556	0.340498	0.821816	0.313109	1	0.466319	0.728689	0.486773
BnaC02g00520D	106418127	putative ETHYLENE INSENSITIVE 3-like 4 protein	AT5G10120.1		Ethylene insensitive 3 family protein	K14514	ETH signaling	8.56142	5.48618	-3.71703	3.91574	3.55699	-0.164061	7.00879e-13	1.83352e-10	0.292134	0.00206933	7.68451e-05	1
BnaC03g04150D	106441413	putative ETHYLENE INSENSITIVE 3-like 4 protein	AT5G10120.1		Ethylene insensitive 3 family protein	K14514	ETH signaling	2.90969	1.81191	-0.0157926	0.0258414	0.01052	-0.00702712	7.80227e-24	5.72883e-05	1	1	1	1
BnaC03g04160D	106383352	putative ETHYLENE INSENSITIVE 3-like 4 protein	AT5G10120.1		Ethylene insensitive 3 family protein	K14514	ETH signaling	2.58527	1.90616	-0.0277625	-0.0254575	-0.0131141	0.05735	6.00975e-10	0.000233956	1	1	1	1
BnaA04g14890D	106391136	EIN3-binding F-box protein 1-like	AT2G25490.1	EBF1	EIN3-binding F box protein 1	K14515	ETH signaling	-0.621688	-0.519561	0.493882	-0.205703	-0.754079	0.255848	0.0212989	0.089997	0.25415	0.549114	0.00780828	0.712824
BnaC04g37750D	106394108	LOW QUALITY PROTEIN: EIN3-binding F-box protein 1-like] [exception	AT2G25490.1	EBF1	EIN3-binding F box protein 1	K14515	ETH signaling	-0.933483	-0.89702	0.0373345	-0.811312	-1.01817	0.228258	0.000129714	0.000611734	1	0.00140164	6.37741e-05	0.725771
BnaA09g04600D	106365899	EIN3-binding F-box protein 2	AT5G25350.1	EBF2	EIN3-binding F box protein 2	K14515	ETH signaling	2.43795	-1.07998	-0.0804857	1.96188	-0.870141	0.683976	1.2885e-08	0.024697	1	6.16472e-06	0.0715724	0.427582
BnaC09g04050D	111209602	EIN3-binding F-box protein 2-like	AT5G25350.1	EBF2	EIN3-binding F box protein 2	K14515	ETH signaling	1.82173	-0.82128	0.322252	1.74558	-0.757721	0.0542606	9.74967e-09	0.0229824	0.665356	6.14693e-08	0.034074	1
BnaC07g29410D	106410357	EIN3-binding F-box protein 2	AT5G25350.1	EBF2	EIN3-binding F box protein 2	K14515	ETH signaling	0.890258	-0.238471	0.00596469	0.709384	-0.0321465	0.405645	0.00142316	0.534815	1	0.0160893	0.961737	0.501144
BnaA06g27640D	106348528	EIN3-binding F-box protein 2-like	AT5G25350.1	EBF2	EIN3-binding F box protein 2	K14515	ETH signaling	0.86666	-0.502521	-0.153068	1.13091	-0.143644	-0.179687	0.000783835	0.0970632	0.853507	1.48364e-05	0.70237	0.838087
BnaA01g23940D	106378600	ethylene-responsive transcription factor 1B	AT3G23240.1	ERF1	ethylene response factor 1	K14516	ETH signaling	3.64117	-0.174532	-1.12535	1.47068	0.981552	-1.01632	1.81773e-05	0.909462	0.54285	0.102838	0.323198	0.65971
BnaA02g25110D	106400711	ethylene-responsive transcription factor 2	AT5G47220.1	ERF2	ethylene responsive element binding factor 2	K14517	ETH signaling	3.6849	1.41176	-0.360488	2.62266	1.56434	0.327116	1.57577e-14	0.00594875	0.751928	5.57247e-08	0.00216971	0.823239
BnaCnng60520D	106381868	ethylene-responsive transcription factor 2-like	AT5G47220.1	ERF2	ethylene responsive element binding factor 2	K14517	ETH signaling	3.06153	1.4361	-0.306442	1.72939	1.72221	0.0984968	6.98184e-15	0.000637712	0.749188	1.15145e-05	2.61556e-05	0.98704
BnaA06g35500D	106400794	ethylene-responsive transcription factor 2-like	AT5G47220.1	ERF2	ethylene responsive element binding factor 2	K14517	ETH signaling	2.44489	0.913719	0.27899	-0.460786	0.217494	0.374772	0.000939173	0.315691	0.924916	0.629431	0.851529	0.888386
BnaC07g20040D	106407379	ethylene-responsive transcription factor 2-like	AT5G47220.1	ERF2	ethylene responsive element binding factor 2	K14517	ETH signaling	2.25483	0.289677	-0.29949	0.768046	0.962337	0.470401	0.000778763	0.78352	0.905042	0.324679	0.225153	0.830571
BnaAnng07060D	106430004	ethylene-responsive transcription factor 2-like	AT5G47220.1	ERF2	ethylene responsive element binding factor 2	K14517	ETH signaling	0.585858	-1.10157	0.152842	1.00958	0.200263	1.8337	0.457331	0.17545	0.989768	0.182597	0.85642	0.144869
BnaC09g20090D	106416580	ethylene-responsive transcription factor 2	AT5G47220.1	ERF2	ethylene responsive element binding factor 2	K14517	ETH signaling	0.36423	-0.244313	0.463707	1.07796	-0.0527133	-0.844405	0.560647	0.757591	0.740204	0.0502277	0.96751	0.559956

## Sheet: GA
ID	KEGG_ID	HitDesc	AGI	symbol	description	KEGG_Ath	pathway	logFC Root_H4h_AV	logFC Root_H24h_AV	logFC Leaf_H24h_AV	logFC Root_H4h_ZS	logFC Root_H24h_ZS	logFC Leaf_H24h_ZS	FDR Root_H4h_AV	FDR Root_H24h_AV	FDR Leaf_H24h_AV	FDR Root_H4h_ZS	FDR Root_H24h_ZS	FDR Leaf_H24h_ZS
BnaA09g01090D	106392263	ent-copalyl diphosphate synthase, chloroplastic-like	AT4G02780.1	GA1	Terpenoid cyclases/Protein prenyltransferases superfamily protein	K04120	GA biosynthesis	0.740756	-2.1263	-0.10357	1.30475	-0.513464	-0.0563526	0.375967	0.0751301	0.97596	0.364742	0.836192	1
BnaAnng04000D	106443785	ent-copalyl diphosphate synthase, chloroplastic-like	AT4G02780.1	GA1	Terpenoid cyclases/Protein prenyltransferases superfamily protein	K04120	GA biosynthesis	0.0424201	0.893632	-1.00352	0.396666	-0.22743	0.0571762	0.982613	0.397808	0.653272	0.724182	0.873762	1
BnaA07g34940D	106354788	ent-kaur-16-ene synthase, chloroplastic isoform X1	AT1G79460.1	GA2	Terpenoid cyclases/Protein prenyltransferases superfamily protein	K04121	GA biosynthesis	0.00338325	0.132006	0.518387	-0.27536	-0.631518	-0.448878	1	0.816091	0.383339	0.618698	0.182096	0.547536
BnaC06g39870D	106430723	ent-kaur-16-ene synthase, chloroplastic isoform X1	AT1G79460.1	GA2	Terpenoid cyclases/Protein prenyltransferases superfamily protein	K04121	GA biosynthesis	-1.17093	-0.920883	0.180431	-1.12431	-0.46549	-0.223964	0.0266745	0.0913242	0.866705	0.0375594	0.513773	0.829478
BnaA06g27960D	106348557	ent-kaurene oxidase, chloroplastic	AT5G25900.1	GA3	GA requiring 3	K04122	GA biosynthesis	1.47927	0.424935	0.496438	1.31072	0.126656	0.489347	2.19364e-05	0.35396	0.46912	0.000320668	0.827839	0.541726
BnaC07g28980D	106348758	ent-kaurene oxidase, chloroplastic-like	AT5G25900.1	GA3	GA requiring 3	K04122	GA biosynthesis	1.11815	-0.557567	0.19078	0.901893	-0.187988	-0.00422957	1.23394e-05	0.0650933	0.809079	0.000668906	0.599662	1
BnaC04g12350D	106440494	ent-kaurenoic acid oxidase 2	AT2G32440.2	KAO2	ent-kaurenoic acid hydroxylase 2	K04123	GA biosynthesis	2.46563	0.683819	0.327208	2.06368	0.286078	-0.0341077	2.33728e-11	0.122586	0.784804	3.53873e-08	0.574014	1
BnaA05g10890D	106451319	ent-kaurenoic acid oxidase 2	AT2G32440.2	KAO2	ent-kaurenoic acid hydroxylase 2	K04123	GA biosynthesis	1.43556	-0.248227	0.0312813	0.912185	-0.588638	0.629546	0.000141267	0.674695	1	0.0284074	0.233006	0.414262
BnaC05g03170D	106401854	ent-kaurenoic acid oxidase 1-like	AT1G05160.1	CYP88A3	cytochrome P450, family 88, subfamily A, polypeptide 3	K04123	GA biosynthesis	-0.329704	-0.496274	-0.164592	-0.984625	-0.876579	0.509801	0.426129	0.292378	0.895314	0.0378982	0.0811282	0.624644
BnaC07g39650D	106408444	gibberellin 20 oxidase 1-like] [partial	AT4G25420.1	GA20OX1	2-oxoglutarate (2OG) and Fe(II)-dependent oxygenase superfamily protein	K05282	GA biosynthesis	4.92562	5.32949	0.534929	5.30947	3.61603	-2.81726	8.57821e-09	3.41107e-08	0.906377	1.3358e-09	2.23264e-05	0.2579
BnaC01g17380D	106444211	gibberellin 20 oxidase 1-like	AT4G25420.1	GA20OX1	2-oxoglutarate (2OG) and Fe(II)-dependent oxygenase superfamily protein	K05282	GA biosynthesis	-2.35113	1.3837	-0.777081	5.31429	3.32147	-1.23505	0.147578	0.422462	0.822709	1.29412e-05	0.0064133	0.693327
BnaC03g02920D	106426311	gibberellin 20 oxidase 3-like	AT5G07200.1	GA20OX3	gibberellin 20-oxidase 3	K05282	GA biosynthesis	0.817069	1.28949	0.300187	-0.726052	0.674528	-0.490957	0.496207	0.283931	0.951078	0.562523	0.595784	0.87929
BnaC09g48370D	106446088	gibberellin 20 oxidase 3 isoform X1	AT5G07200.1	GA20OX3	gibberellin 20-oxidase 3	K05282	GA biosynthesis	0.216949	-0.265884	-3.21674	-0.447472	0.0752455	-1.52512	0.854792	0.89353	4.6005e-05	0.746528	0.974828	0.129639
BnaA10g23640D	106419446	gibberellin 20 oxidase 3-like	AT5G07200.1	GA20OX3	gibberellin 20-oxidase 3	K05282	GA biosynthesis	0.0330653	-1.67261	-0.508801	-0.00889039	-1.65972	-1.20979	1	0.446454	0.809271	1	0.465726	0.461544
BnaC05g11920D	106378169	gibberellin 3-beta-dioxygenase 1	AT1G15550.1	GA3OX1	gibberellin 3-oxidase 1	K04124	GA biosynthesis	-2.77081	-1.72404	1.04546	-2.90984	-2.20435	-0.872928	0.000196219	0.0318673	0.702389	0.000195699	0.00461687	0.741725
BnaA06g10250D	106351318	gibberellin 3-beta-dioxygenase 1	AT1G15550.1	GA3OX1	gibberellin 3-oxidase 1	K04124	GA biosynthesis	-2.89827	0.38415	-0.65485	-3.11903	-0.538591	-0.508137	9.81728e-05	0.713013	0.694623	0.00014149	0.578836	0.885091
BnaA02g19810D	106398539	gibberellin 3-beta-dioxygenase 2	AT1G80340.1	GA3OX2	gibberellin 3-oxidase 2	K04124	GA biosynthesis	-1.26685	0.629655	-2.02904	0.329373	-0.0730634	-1.00781	0.135066	0.549485	0.177366	0.7718	0.970638	0.700638
BnaC01g12970D	106432150	gibberellin 3-beta-dioxygenase 3	AT4G21690.1	GA3OX3	gibberellin 3-oxidase 3	K04124	GA biosynthesis	0.852754	0.635191	0.219944	0.215569	0.91135	0.226157	0.0373996	0.196279	0.871409	0.697699	0.0358198	0.872499
BnaCnng35770D	106404899	uncharacterized protein LOC106404899] [exception	AT1G78440.1	ATGA2OX1	gibberellin 2-beta-dioxygenase	K04125	GA degradation	1.01207	-1.30198	-1.3376	1.69953	-1.15589	0.227889	0.253106	0.17914	0.372202	0.0518625	0.223985	0.976901
BnaA02g18900D	106444436	gibberellin 2-beta-dioxygenase 1-like	AT1G78440.1	ATGA2OX1	gibberellin 2-beta-dioxygenase	K04125	GA degradation	0.407262	-0.156398	-0.665042	0.373336	-0.220394	0.366573	0.696033	0.921402	0.746077	0.755469	0.873294	0.920314
BnaA05g09290D	106450284	gibberellin 2-beta-dioxygenase 3-like	AT2G34555.1	ATGA2OX3	gibberellin 2-oxidase 3	K04125	GA degradation	6.85307	8.28294	0.0818252	7.13857	6.32477	-2.2381	2.7635e-22	1.11632e-21	1	2.70273e-24	1.36345e-21	0.724992
BnaA10g01100D	106370917	gibberellin 2-beta-dioxygenase 6] [exception	AT1G02400.1	GA2OX6	gibberellin 2-oxidase 6	K04125	GA degradation	2.85245	1.48262	0.0178804	0.328118	-0.204386	-3.29715	0.000226594	0.0843316	1	0.670006	0.817737	0.0855629
BnaC04g02480D	106395019	gibberellin 2-beta-dioxygenase 6	AT1G02400.1	GA2OX6	gibberellin 2-oxidase 6	K04125	GA degradation	-0.0495025	0.278401	0.678318	0.675455	1.05161	0.725466	0.939474	0.623093	0.848282	0.136351	0.0115927	0.831597
BnaC05g01200D	106401876	gibberellin 2-beta-dioxygenase 6-like	AT1G02400.1	GA2OX6	gibberellin 2-oxidase 6	K04125	GA degradation	-0.410375	-1.37002	0.784421	-0.0249752	-0.137773	0.906781	0.438598	0.00728657	0.638434	0.998006	0.856286	0.68014
BnaA08g27130D	106395019	gibberellin 2-beta-dioxygenase 6	AT1G02400.1	GA2OX6	gibberellin 2-oxidase 6	K04125	GA degradation	-3.45504	-1.16655	1.73406	-1.07504	-0.661832	-2.11784	3.37529e-06	0.0997165	0.590868	0.163625	0.388957	0.727335
BnaA08g17610D	106361601	gibberellin 2-beta-dioxygenase 2-like	AT1G30040.1	GA2OX2	gibberellin 2-oxidase	K04125	GA degradation	2.0935	2.22139	2.0919	1.33368	0.961702	0.928418	0.00169087	0.00181149	0.242129	0.0645798	0.217773	0.642618
BnaA07g07480D	106357909	gibberellin 2-beta-dioxygenase 2 isoform X1	AT1G30040.1	GA2OX2	gibberellin 2-oxidase	K04125	GA degradation	2.05888	1.16496	2.30172	1.63006	1.50289	0.846624	0.00108265	0.12835	0.638434	0.015245	0.0333731	0.773211
BnaC07g09260D	106375617	gibberellin 2-beta-dioxygenase 2	AT1G30040.1	GA2OX2	gibberellin 2-oxidase	K04125	GA degradation	0.814462	1.16002	-0.00106134	1.75945	1.31267	-0.221043	0.250759	0.132204	1	0.0101725	0.074439	1
BnaC03g59610D	106375947	gibberellin 2-beta-dioxygenase 2	AT1G30040.1	GA2OX2	gibberellin 2-oxidase	K04125	GA degradation	0.613994	0.355868	0.18383	-0.677743	0.490068	1.69337	0.341363	0.670402	1	0.323091	0.509922	0.321479
BnaA09g20650D	106411110	gibberellin receptor GID1C-like	AT5G27320.1	GID1C	alpha/beta-Hydrolases superfamily protein	K14493	GA signaling	1.94022	1.06676	0.169941	1.81803	1.09477	0.152238	4.49364e-14	0.000134396	0.858646	3.42349e-12	7.58948e-05	0.891152
BnaC07g27790D	106348662	gibberellin receptor GID1C	AT5G27320.1	GID1C	alpha/beta-Hydrolases superfamily protein	K14493	GA signaling	0.708298	0.432333	0.410678	0.951626	0.545893	0.603035	0.288144	0.61091	0.796883	0.159612	0.478101	0.691478
BnaA05g32040D	106453059	gibberellin receptor GID1A	AT3G05120.1	GID1A	alpha/beta-Hydrolases superfamily protein	K14493	GA signaling	2.62355	2.13807	0.750374	2.52915	2.50984	0.237176	4.06505e-10	1.30944e-06	0.372901	4.20273e-09	1.80871e-08	0.917245
BnaC05g46680D	106453025	gibberellin receptor GID1A	AT3G05120.1	GID1A	alpha/beta-Hydrolases superfamily protein	K14493	GA signaling	0.613503	1.57999	0.540875	1.52554	1.26928	0.65036	0.117505	5.68728e-05	0.591022	4.18824e-05	0.00122267	0.454809
BnaA09g55590D	106372767	gibberellin receptor GID1B-like	AT3G63010.1	GID1B	alpha/beta-Hydrolases superfamily protein	K14493	GA signaling	1.32014	0.472599	-0.551629	0.517237	0.519421	0.83612	0.00178049	0.38713	0.752194	0.297311	0.312608	0.533976
BnaCnng55170D	106372767	gibberellin receptor GID1B-like	AT3G63010.1	GID1B	alpha/beta-Hydrolases superfamily protein	K14493	GA signaling	1.28062	1.13858	1.76741	0.904287	1.65827	0.796798	1.20163e-05	0.000304969	0.0563171	0.00340654	3.89844e-08	0.564185
BnaA07g19530D	106353329	gibberellin receptor GID1B-like	AT3G63010.1	GID1B	alpha/beta-Hydrolases superfamily protein	K14493	GA signaling	1.08474	0.117367	4.31699	1.16472	0.781403	0.00678474	3.88645e-05	0.788737	0.125196	1.69123e-05	0.00673317	1
BnaCnng69280D	106394964	gibberellin receptor GID1B-like	AT3G63010.1	GID1B	alpha/beta-Hydrolases superfamily protein	K14493	GA signaling	1.00992	0.241363	3.12101	1.2257	0.556212	-2.97041	0.0422584	0.742773	0.438654	0.0153487	0.346189	0.569345
BnaC04g21040D	106444955	gibberellin receptor GID1B	AT3G63010.1	GID1B	alpha/beta-Hydrolases superfamily protein	K14493	GA signaling	0.829781	0.662616	1.45687	0.508995	0.513438	0.675189	0.0173628	0.110089	0.135645	0.197136	0.226502	0.593912
BnaA04g00210D	106444955	gibberellin receptor GID1B	AT3G63010.1	GID1B	alpha/beta-Hydrolases superfamily protein	K14493	GA signaling	-0.136669	-0.32502	-4.05158	0.10336	0.0207216	-1.6519	0.681217	0.344652	0.182908	0.798459	0.982485	0.626052
BnaC01g16070D	106376023	F-box protein GID2-like isoform X1	AT4G24210.1	SLY1	F-box family protein	K14495	GA signaling	0.134035	-0.101702	0.35094	-0.359101	-0.540947	-0.513572	0.849796	0.917815	0.837052	0.594888	0.394274	0.712603
BnaA01g13690D	106411860	F-box protein GID2-like	AT4G24210.1	SLY1	F-box family protein	K14495	GA signaling	-0.113066	-0.0349324	0.216603	-0.254966	-0.351959	-0.0630491	0.739185	0.951571	0.783901	0.446612	0.280463	0.998846
BnaCnng68300D	106426289	DELLA protein RGL1	AT1G66350.1	RGL1	RGA-like 1	K14494	GA signaling	0.803808	-0.537393	0.74397	-0.346925	-3.32046	-3.67375	0.323427	0.603482	0.638434	0.774995	0.000600802	0.001845
BnaCnng28010D	106426289	DELLA protein RGL1	AT1G66350.1	RGL1	RGA-like 1	K14494	GA signaling	-1.10946	-1.15484	0.520545	-0.64778	-0.342949	-0.623769	0.00677839	0.0105036	0.50703	0.139408	0.490407	0.426155
BnaC05g47770D	106450539	DELLA protein RGL2 isoform X3	AT3G03450.1	RGL2	RGA-like 2	K14494	GA signaling	-0.0717074	-0.329594	0.310163	-0.973782	-0.349961	-0.239745	0.913415	0.716168	0.733292	0.022095	0.661214	0.856593
BnaA05g32640D	106450539	DELLA protein RGL2 isoform X2	AT3G03450.1	RGL2	RGA-like 2	K14494	GA signaling	-0.206202	0.724195	1.04717	-0.5567	0.480874	0.170548	0.761766	0.369895	0.275223	0.377538	0.554154	0.979913
BnaC05g47760D	106450539	DELLA protein RGL2 isoform X3	AT3G03450.1	RGL2	RGA-like 2	K14494	GA signaling	-0.357539	-0.219655	0.41741	0.0155333	-0.34613	-0.249364	0.375334	0.704279	0.550425	1	0.497049	0.809101
BnaA05g32630D	106450539	DELLA protein RGL2 isoform X3	AT3G03450.1	RGL2	RGA-like 2	K14494	GA signaling	-0.624669	-0.572236	1.32629	-1.11828	-0.8055	-0.643287	0.224696	0.509578	0.146679	0.0062169	0.242211	0.590626
BnaC09g40420D	106426199	DELLA protein RGL3	AT5G17490.1	RGL3	RGA-like protein 3	K14494	GA signaling	0.797345	-0.00950933	0.372754	0.47348	-0.183299	0.371485	0.0096682	1	0.534046	0.175081	0.683995	0.595097
BnaA10g17240D	106387732	DELLA protein RGL3-like	AT5G17490.1	RGL3	RGA-like protein 3	K14494	GA signaling	0.606965	-0.0370739	0.449061	0.384617	-0.836621	1.11151	0.310466	0.982336	0.716321	0.603212	0.245177	0.321479
BnaC09g52270D	106405764	DELLA protein RGA2-like	AT2G01570.1	RGA1	GRAS family transcription factor family protein	K14494	GA signaling	0.217274	-0.279405	-0.289767	0.0454223	-0.556018	-0.0674692	0.415184	0.350024	0.519942	0.918673	0.0306591	0.974247
BnaC07g28840D	106389181	DELLA protein RGA1	AT2G01570.1	RGA1	GRAS family transcription factor family protein	K14494	GA signaling	-0.0162897	1.24471	1.29317	-1.06215	-0.0958339	0.315441	1	0.416569	0.67187	0.425889	0.980254	1
BnaC07g20900D	106389181	DELLA protein RGA1	AT2G01570.1	RGA1	GRAS family transcription factor family protein	K14494	GA signaling	-0.0410318	0.128533	-0.17532	-0.551437	0.156417	0.184493	0.894823	0.682133	0.722811	0.0125375	0.584883	0.731366
BnaA06g34810D	106389181	DELLA protein RGA1	AT2G01570.1	RGA1	GRAS family transcription factor family protein	K14494	GA signaling	-0.248607	-0.154483	-0.0676221	-0.682393	-0.366064	0.0119258	0.394215	0.683416	0.972668	0.0124923	0.243607	1
BnaA09g18700D	106445425	DELLA protein RGA2	AT2G01570.1	RGA1	GRAS family transcription factor family protein	K14494	GA signaling	-0.741887	-0.77116	-0.182679	-0.727959	-0.848421	0.264561	0.00520636	0.00703326	0.787987	0.00806147	0.00221013	0.682041
BnaA09g48450D	111197989	transcription factor PIF3-like	AT1G09530.5	PIF3	phytochrome interacting factor 3	K12126	GA signaling	0.655543	0.254948	0.28709	0.977754	-1.20149	-1.37246	0.31919	0.787351	0.879518	0.226277	0.136328	0.158451
BnaC08g42700D	106419805	transcription factor PIF3	AT1G09530.5	PIF3	phytochrome interacting factor 3	K12126	GA signaling	0.604579	0.575601	0.261842	0.639687	0.591438	0.0101067	0.094703	0.168027	0.750793	0.0880375	0.136522	1
BnaC05g07080D	106397555	transcription factor PIF3	AT1G09530.5	PIF3	phytochrome interacting factor 3	K12126	GA signaling	0.0345096	-0.5336	0.546101	-0.532486	-0.615508	0.239621	0.960563	0.305022	0.469962	0.224608	0.170966	0.831133
BnaA06g37850D	106346269	transcription factor PIF3-like	AT1G09530.5	PIF3	phytochrome interacting factor 3	K12126	GA signaling	-1.32721	-1.06691	0.442862	-0.549703	-0.563194	0.222775	0.00314239	0.0475805	0.59363	0.365914	0.350103	0.861825
BnaC04g48630D	106391706	transcription factor PIF4 isoform X1	AT2G43010.2	PIF4	phytochrome interacting factor 4	K16189	GA signaling	1.62676	-0.00410928	0.378822	1.7794	-1.64954	-0.00148878	0.330754	1	0.567356	0.379717	0.461223	1
BnaA04g24760D	106351676	transcription factor PIF4-like isoform X1	AT2G43010.2	PIF4	phytochrome interacting factor 4	K16189	GA signaling	1.47202	3.28388	0.48601	-1.67172	1.86927	-0.58486	0.378286	0.0809537	0.669577	0.425292	0.379778	0.632422
BnaC03g23970D	106388298	transcription factor PIF4	AT2G43010.2	PIF4	phytochrome interacting factor 4	K16189	GA signaling	0.45362	0.19167	0.572748	0.0770065	-0.287351	-0.0834863	0.311708	0.768912	0.18222	0.90778	0.547575	0.971572
BnaA03g19970D	106388298	transcription factor PIF4	AT2G43010.2	PIF4	phytochrome interacting factor 4	K16189	GA signaling	-1.00806	-1.65555	0.629528	-0.374809	-0.538179	0.457073	0.549953	0.443342	0.408262	0.862206	0.829409	0.641679
BnaC08g29580D	106368315	transcription factor PIF5 isoform X1	AT3G59060.4	PIL6	phytochrome interacting factor 3-like 6	K16189	GA signaling	-0.553965	0.622264	0.189878	-0.662676	0.398707	0.259379	0.591045	0.527879	0.841263	0.509771	0.855143	0.762335
BnaA09g37540D	111200351	transcription factor PIF5-like	AT3G59060.4	PIL6	phytochrome interacting factor 3-like 6	K16189	GA signaling	-0.571259	1.68211	-0.049683	-2.47024	-0.488946	0.468941	0.421902	0.0875085	1	0.000319791	0.699109	0.502326

## Sheet: JA
ID	KEGG_ID	HitDesc	AGI	symbol	description	KEGG_Ath	pathway	logFC Root_H4h_AV	logFC Root_H24h_AV	logFC Leaf_H24h_AV	logFC Root_H4h_ZS	logFC Root_H24h_ZS	logFC Leaf_H24h_ZS	FDR Root_H4h_AV	FDR Root_H24h_AV	FDR Leaf_H24h_AV	FDR Root_H4h_ZS	FDR Root_H24h_ZS	FDR Leaf_H24h_ZS
BnaA07g19600D	106353334	lipoxygenase 2, chloroplastic-like	AT3G45140.1	LOX2	lipoxygenase 2	K00454	JA metabolism	2.04598	0.329402	0.476568	-0.0603962	-0.421313	0.528651	0.006449	0.782557	0.725831	0.983645	0.705325	0.725771
BnaC06g18870D	106383072	lipoxygenase 2, chloroplastic-like	AT3G45140.1	LOX2	lipoxygenase 2	K00454	JA metabolism	1.58435	-0.666034	0.464288	0.512672	0.282351	0.838558	0.0282709	0.532237	0.650499	0.611128	0.817802	0.338951
BnaCnng38640D	106406325	lipoxygenase 2, chloroplastic-like] [exception	AT3G45140.1	LOX2	lipoxygenase 2	K00454	JA metabolism	-0.0243176	-1.62533	0.00239004	-2.38736	-1.63476	-0.8458	1	0.447642	1	0.238982	0.464759	0.406877
BnaCnng78230D	106406325	lipoxygenase 2, chloroplastic-like isoform X1	AT3G45140.2	LOX2	lipoxygenase 2	K00454	JA metabolism	-0.108202	-0.642428	0.234321	-1.85052	-1.64582	-0.646	0.943929	0.654843	0.908499	0.152325	0.46357	0.601249
BnaAnng34320D	106406325	lipoxygenase 2, chloroplastic-like isoform X1	AT3G45140.2	LOX2	lipoxygenase 2	K00454	JA metabolism	-1.44788	-3.75694	1.0472	-0.027864	-0.01123	-1.08351	0.406812	0.0345611	0.228129	1	1	0.302168
BnaA07g38540D	106406325	lipoxygenase 2, chloroplastic-like isoform X1	AT3G45140.2	LOX2	lipoxygenase 2	K00454	JA metabolism	-2.63784	-0.772736	1.2657	-0.0245915	-0.0104553	-0.88318	0.125974	0.740167	0.101161	1	1	0.423612
BnaC08g37760D	106430278	lipoxygenase 3, chloroplastic	AT1G17420.1	LOX3	lipoxygenase 3	K00454	JA metabolism	2.34993	-1.96789	-0.341512	-3.76688	-4.81727	-0.256821	0.00174479	0.00651554	0.666691	0.0267605	0.00184852	0.89085
BnaC08g48320D	106358574	lipoxygenase 3, chloroplastic	AT1G17420.1	LOX3	lipoxygenase 3	K00454	JA metabolism	0.638817	0.900822	-0.456185	-1.43963	2.08735	-0.255134	0.556135	0.624004	0.728285	0.0987879	0.0153167	0.911353
BnaA02g13230D	106396874	lipoxygenase 6, chloroplastic-like	AT1G67560.1	LOX6	PLAT/LH2 domain-containing lipoxygenase family protein	K00454	JA metabolism	0.112338	-0.436537	-0.125364	0.274956	-0.583264	0.0678723	0.845235	0.423843	0.964406	0.623194	0.248256	1
BnaC02g45800D	106396874	lipoxygenase 6, chloroplastic-like	AT1G67560.1	LOX6	PLAT/LH2 domain-containing lipoxygenase family protein	K00454	JA metabolism	-0.281358	-0.779845	0.249088	-0.0691985	-1.02366	0.168732	0.329224	0.00480879	0.713832	0.870866	0.000105302	0.86055
BnaA07g24960D	106410673	lipoxygenase 6, chloroplastic-like	AT1G67560.1	LOX6	PLAT/LH2 domain-containing lipoxygenase family protein	K00454	JA metabolism	-0.325765	-0.0700794	0.20405	-0.196165	0.228789	0.119313	0.297222	0.892074	0.762046	0.593702	0.536785	0.920657
BnaC06g26670D	111207131	lipoxygenase 6, chloroplastic-like	AT1G67560.1	LOX6	PLAT/LH2 domain-containing lipoxygenase family protein	K00454	JA metabolism	-0.743515	-0.780913	-0.0456996	-0.829201	-1.10323	-0.0746579	0.00783905	0.0110685	1	0.00427912	0.000181724	0.983677
BnaC02g21440D	106381296	lipoxygenase 4, chloroplastic isoform X1	AT1G72520.1	LOX4	PLAT/LH2 domain-containing lipoxygenase family protein	K00454	JA metabolism	1.94671	1.74637	-0.399717	1.72189	2.02565	-0.0612418	0.00559912	0.0272549	0.841832	0.0183807	0.00877158	1
BnaA02g16020D	106446190	lipoxygenase 4, chloroplastic-like	AT1G72520.1	LOX4	PLAT/LH2 domain-containing lipoxygenase family protein	K00454	JA metabolism	1.68097	2.42196	0.0409894	2.16646	2.77747	0.275798	0.0539434	0.0114434	1	0.0185151	0.00363595	0.963997
BnaC02g29610D	106446379	allene oxide synthase, chloroplastic-like	AT5G42650.1	AOS	allene oxide synthase	K01723	JA metabolism	-1.36279	-0.986062	0.501849	-2.04167	-1.5355	0.283778	0.00063304	0.0274031	0.524141	4.31826e-07	0.000238125	0.808192
BnaA02g23180D	106429839	allene oxide synthase, chloroplastic	AT5G42650.1	AOS	allene oxide synthase	K01723	JA metabolism	-1.66322	-1.38518	0.860853	-2.08504	-1.51653	0.0125452	0.0002146	0.00465821	0.230395	5.96139e-06	0.00141363	1
BnaA06g33410D	106352449	allene oxide cyclase 2, chloroplastic	AT3G25770.1	AOC2	allene oxide cyclase 2	K10525	JA metabolism	3.07957	-1.14349	0.482539	-1.6966	-0.728567	-0.678239	0.00111197	0.208307	0.82158	0.426197	0.629369	0.760891
BnaC09g52550D	106416621	allene oxide cyclase 3, chloroplastic	AT3G25780.1	AOC3	allene oxide cyclase 3	K10525	JA metabolism	1.28761	0.755724	1.29755	1.6209	0.740335	-0.797286	0.292646	0.621216	0.616487	0.191488	0.611366	0.824406
BnaA06g33400D	106350927	allene oxide cyclase 3, chloroplastic-like	AT3G25780.1	AOC3	allene oxide cyclase 3	K10525	JA metabolism	0.141639	0.512983	-0.0476338	-0.0502801	1.74636	0.00308756	0.872132	0.665142	1	0.982303	0.0238846	1
BnaA09g19570D	106437957	allene oxide cyclase 3, chloroplastic-like] [exception	AT3G25780.1	AOC3	allene oxide cyclase 3	K10525	JA metabolism	-0.547884	0.0295433	0.85275	-0.302629	0.213451	-0.761133	0.372835	0.989038	0.476265	0.684637	0.797321	0.628493
BnaA08g24350D	106382355	allene oxide cyclase 4, chloroplastic-like	AT1G13280.1	AOC4	allene oxide cyclase 4	K10525	JA metabolism	0.121728	-1.18014	-0.23772	-0.216174	-0.676311	0.158057	0.810165	0.00398511	0.829548	0.674995	0.117388	0.929101
BnaC08g15790D	106362074	allene oxide cyclase 4, chloroplastic	AT1G13280.1	AOC4	allene oxide cyclase 4	K10525	JA metabolism	-1.16305	-0.727243	0.488613	-1.1948	-1.2445	0.543417	4.16919e-05	0.02368	0.322051	4.03356e-05	2.98907e-05	0.294364
BnaC03g45030D	106418331	12-oxophytodienoate reductase 3	AT2G06050.3	OPR3	oxophytodienoate-reductase 3	K05894	JA metabolism	-0.293577	-0.192356	0.114308	-0.414929	-0.29708	0.149776	0.402467	0.66687	0.933901	0.242417	0.446579	0.899975
BnaA03g38210D	106439775	12-oxophytodienoate reductase 3-like	AT2G06050.3	OPR3	oxophytodienoate-reductase 3	K05894	JA metabolism	-0.416452	0.0156857	-0.113725	-0.122376	-0.0315083	-0.0705073	0.253138	0.992702	0.943425	0.809924	0.971988	0.99922
BnaC04g29730D	106387698	12-oxophytodienoate reductase 1	AT1G76680.2	OPR1	12-oxophytodienoate reductase 1	K05894	JA metabolism	3.04769	2.50664	-0.625836	1.95494	2.00376	-0.1625	6.79778e-11	3.03141e-07	0.523256	3.74208e-05	3.47056e-05	0.958752
BnaC09g41020D	106387698	12-oxophytodienoate reductase 1	AT1G76680.1	OPR1	12-oxophytodienoate reductase 1	K05894	JA metabolism	0.973032	-1.18063	6.14782	2.16051	-2.99821	1.96434	0.460634	0.406089	0.0231303	0.0813851	0.016881	0.4167
BnaA10g17650D	106371976	12-oxophytodienoate reductase 1-like	AT1G76680.1	OPR1	12-oxophytodienoate reductase 1	K05894	JA metabolism	0.624231	-1.32764	-0.046676	3.93251	1.28773	0.492609	0.567661	0.257854	1	0.000116355	0.241811	0.962536
BnaA02g17670D	106397650	12-oxophytodienoate reductase 1 isoform X1	AT1G76680.1	OPR1	12-oxophytodienoate reductase 1	K05894	JA metabolism	-0.684925	-0.974029	0.097997	-0.566476	-0.625227	0.255368	0.290047	0.167986	1	0.426383	0.398168	0.920314
BnaC02g24210D	106376739	12-oxophytodienoate reductase 1-like	AT1G76680.1	OPR1	12-oxophytodienoate reductase 1	K05894	JA metabolism	-1.40843	-1.34336	0.11538	-0.56181	-0.746098	-0.415856	0.0104278	0.0272549	0.989842	0.390268	0.253385	0.778865
BnaC08g19310D	106431167	4-coumarate--CoA ligase-like 5	AT1G20510.1	OPCL1	OPC-8:0 CoA ligase1	K10526	JA metabolism	1.18064	1.15625	-0.119819	0.503134	1.2421	0.111084	0.00924965	0.0209933	0.972476	0.349688	0.0102678	0.987719
BnaA08g21760D	106440735	4-coumarate--CoA ligase-like 5	AT1G20510.1	OPCL1	OPC-8:0 CoA ligase1	K10526	JA metabolism	0.88718	0.573171	-0.234587	0.764993	0.372891	0.162908	0.0551501	0.314517	0.872738	0.122594	0.524513	0.951095
BnaC03g56590D	111198587	4-coumarate--CoA ligase-like 2	AT1G20480.1		AMP-dependent synthetase and ligase family protein	K10526	JA metabolism	0.484304	-0.0482682	-0.771373	-0.0730984	-6.75029	-7.23148	0.893919	0.973829	0.850204	1	0.0379305	0.194231
BnaC08g19270D	106431155	4-coumarate--CoA ligase-like 2	AT1G20480.1		AMP-dependent synthetase and ligase family protein	K10526	JA metabolism	-0.0677325	0.215926	-0.0144038	-0.133186	0.039826	0.13576	0.926306	0.7781	1	0.864266	0.979905	0.981344
BnaA06g14430D	111198587	4-coumarate--CoA ligase-like 2	AT1G20480.1		AMP-dependent synthetase and ligase family protein	K10526	JA metabolism	-0.0929884	-0.549196	0.36747	-0.198608	-0.904759	1.13855	0.905235	0.446769	0.889493	0.805191	0.160111	0.515081
BnaC05g15810D	111198587	4-coumarate--CoA ligase-like 2	AT1G20480.1		AMP-dependent synthetase and ligase family protein	K10526	JA metabolism	-0.844852	-1.0668	0.0868508	-0.924786	-1.83287	-0.61132	0.10008	0.0642483	1	0.0909036	0.000745909	0.625479
BnaA08g21810D	106440741	4-coumarate--CoA ligase-like 2	AT1G20480.1		AMP-dependent synthetase and ligase family protein	K10526	JA metabolism	-0.907473	-1.46935	1.57695	-0.98685	-1.52967	0.964649	0.128284	0.0247329	0.15347	0.0844089	0.00878091	0.366796
BnaA07g11430D	106358235	4-coumarate--CoA ligase-like 4	AT1G20500.1		AMP-dependent synthetase and ligase family protein	K10526	JA metabolism	-0.125403	-0.545161	-0.0486268	0.233374	-0.618629	-1.12534	0.795276	0.223576	1	0.631606	0.143115	0.114728
BnaC05g15830D	106350059	4-coumarate--CoA ligase-like 4] [partial	AT1G20500.1		AMP-dependent synthetase and ligase family protein	K10526	JA metabolism	-0.137797	-0.116701	-0.486701	-0.624541	-0.4884	-2.00753	0.91942	0.951535	0.8399	0.597256	0.705697	0.188536
BnaC07g15330D	106410427	4-coumarate--CoA ligase-like 4	AT1G20500.1		AMP-dependent synthetase and ligase family protein	K10526	JA metabolism	-0.160588	-0.166281	0.719361	-0.163909	-0.665717	-0.26138	0.792735	0.8265	0.386064	0.817595	0.224189	0.866898
BnaA07g11420D	106358228	4-coumarate--CoA ligase-like 4	AT1G20500.1		AMP-dependent synthetase and ligase family protein	K10526	JA metabolism	-0.697977	-0.297433	0.181089	-0.248537	-0.0855967	-0.00926077	0.0307382	0.482486	0.856798	0.537051	0.873742	1
BnaA03g16270D	106437859	putative peroxisomal acyl-coenzyme A oxidase 1.2	AT2G35690.1	ACX5	acyl-CoA oxidase 5	K00232	JA metabolism	-2.18771	-1.70731	0.671699	1.09084	-4.21852	0.00837243	0.0143587	0.0877866	0.752194	0.547754	0.000356215	1
BnaC03g19540D	106437859	putative peroxisomal acyl-coenzyme A oxidase 1.2	AT2G35690.1	ACX5	acyl-CoA oxidase 5	K00232	JA metabolism	-2.4547	-2.96777	-1.64624	-2.34328	0.0242823	0.24908	0.0291052	0.0227066	0.164517	0.257334	1	0.962844
BnaA01g18160D	106437449	peroxisomal acyl-coenzyme A oxidase 1	AT4G16760.1	ACX1	acyl-CoA oxidase 1	K00232	JA metabolism	0.766068	-0.247744	0.350661	0.312725	-0.297459	0.153456	0.000738843	0.412973	0.397789	0.242365	0.288307	0.828336
BnaCnng35000D	106437075	peroxisomal acyl-coenzyme A oxidase 1 isoform X2	AT4G16760.1	ACX1	acyl-CoA oxidase 1	K00232	JA metabolism	-0.0788114	-0.208443	-0.00978421	-0.127751	-0.0243919	0.197511	0.80796	0.525304	1	0.705143	0.968902	0.756486
BnaC09g06780D	106414551	acyl-coenzyme A oxidase 2, peroxisomal	AT5G65110.1	ACX2	acyl-CoA oxidase 2	K00232	JA metabolism	1.37814	0.775209	0.0846514	0.989515	0.693242	-0.0220214	9.31768e-08	0.00793317	0.960348	0.000227883	0.0162893	1
BnaA09g07080D	106441260	acyl-coenzyme A oxidase 2, peroxisomal-like	AT5G65110.1	ACX2	acyl-CoA oxidase 2	K00232	JA metabolism	1.00979	0.410571	0.315472	0.433194	0.301731	0.16773	0.000484779	0.263587	0.638434	0.197386	0.41839	0.875993
BnaC03g49190D	106401291	acyl-coenzyme A oxidase 2, peroxisomal	AT5G65110.1	ACX2	acyl-CoA oxidase 2	K00232	JA metabolism	0.661286	-0.4335	0.0837822	0.27408	-0.402144	-0.358108	0.0145814	0.176624	0.958408	0.40265	0.202762	0.5448
BnaA06g24040D	106348000	acyl-coenzyme A oxidase 2, peroxisomal	AT5G65110.1	ACX2	acyl-CoA oxidase 2	K00232	JA metabolism	-0.340467	-0.779241	1.25445	-0.24411	-0.784049	0.0305931	0.493816	0.118652	0.0419295	0.670006	0.0990623	1
BnaA09g32380D	106367680	acyl-coenzyme A oxidase 4, peroxisomal	AT3G51840.1	ACX4	acyl-CoA oxidase 4	K00232	JA metabolism	1.776	0.266476	0.0974917	0.34266	-0.405435	0.043402	7.83605e-09	0.537644	0.96136	0.369493	0.291699	1
BnaC08g23150D	106388175	acyl-coenzyme A oxidase 4, peroxisomal	AT3G51840.1	ACX4	acyl-CoA oxidase 4	K00232	JA metabolism	1.59529	0.281465	0.120383	0.0266359	-0.0691106	0.356161	6.1858e-06	0.574406	0.949472	0.987822	0.920113	0.697391
BnaA04g05950D	106445649	acyl-coenzyme A oxidase 4, peroxisomal	AT3G51840.1	ACX4	acyl-CoA oxidase 4	K00232	JA metabolism	0.907486	0.54079	-0.0389705	0.778707	0.40387	0.275942	0.000108443	0.0470251	1	0.0013992	0.146496	0.633329
BnaC04g28570D	111212065	acyl-coenzyme A oxidase 4, peroxisomal-like isoform X1	AT3G51840.1	ACX4	acyl-CoA oxidase 4	K00232	JA metabolism	0.0486167	-0.0315538	0.253623	-0.0986127	-0.0504892	0.282534	0.869214	0.941572	0.553085	0.741579	0.8914	0.531928
BnaA10g28060D	106427074	acyl-coenzyme A oxidase 3, peroxisomal	AT1G06290.1	ACX3	acyl-CoA oxidase 3	K00232	JA metabolism	-0.775626	-0.913767	0.0713458	-1.38538	-1.10202	-0.154778	0.0566056	0.0381591	1	0.000541912	0.00886516	0.940422
BnaC05g04350D	106401308	acyl-coenzyme A oxidase 3, peroxisomal	AT1G06290.1	ACX3	acyl-CoA oxidase 3	K00232	JA metabolism	-0.980814	-0.823359	0.508053	-1.14201	-0.971522	0.422691	0.000926865	0.011786	0.32356	0.000149827	0.00199062	0.505529
BnaA10g28090D	106401309	putative acyl-coenzyme A oxidase 3.2, peroxisomal	AT1G06310.1	ACX6	acyl-CoA oxidase 6	K00232	JA metabolism	-0.0573499	-1.10405	-0.0133394	-0.991252	-1.72734	-0.0128291	0.941116	0.0469921	1	0.0561733	0.00106465	1
BnaC05g04370D	106401309	putative acyl-coenzyme A oxidase 3.2, peroxisomal	AT1G06310.1	ACX6	acyl-CoA oxidase 6	K00232	JA metabolism	-0.514436	-1.54121	-0.01944	-0.695308	-2.3691	0.0129621	0.378883	0.00796349	1	0.255629	3.53189e-05	1
BnaA03g29710D	106389027	glyoxysomal fatty acid beta-oxidation multifunctional protein MFP-a][protein_id	AT3G06860.1	MFP2	multifunctional protein 2	K10527	JA metabolism	1.3039	-0.231717	-0.133507	0.693903	-0.554794	0.274991	8.76153e-05	0.634532	0.926838	0.0567801	0.159242	0.762946
BnaC03g34950D	106388929	glyoxysomal fatty acid beta-oxidation multifunctional protein MFP-a-like][protein_id	AT3G06860.1	MFP2	multifunctional protein 2	K10527	JA metabolism	0.21337	-0.411074	-0.00081876	-0.0577626	-0.460703	0.0675603	0.46691	0.176624	1	0.897099	0.110845	0.982323
BnaA05g30610D	106348746	glyoxysomal fatty acid beta-oxidation multifunctional protein MFP-a-like][protein_id	AT3G06860.1	MFP2	multifunctional protein 2	K10527	JA metabolism	-0.421826	-0.73405	0.233851	-0.475324	-0.215755	0.550221	0.1704	0.0192063	0.773212	0.134891	0.568317	0.340618
BnaA01g32550D	106346097	glyoxysomal fatty acid beta-oxidation multifunctional protein MFP-a-like][protein_id	AT3G06860.1	MFP2	multifunctional protein 2	K10527	JA metabolism	-1.00031	-0.423379	0.335091	-0.982527	-0.797536	0.0209282	0.000145663	0.192575	0.546469	0.000302705	0.00561679	1
BnaC05g45070D	106401486	glyoxysomal fatty acid beta-oxidation multifunctional protein MFP-a-like][protein_id	AT3G06860.1	MFP2	multifunctional protein 2	K10527	JA metabolism	-1.54669	-0.591557	0.286746	-2.37487	-0.988894	0.142849	8.45542e-06	0.15907	0.749071	2.00813e-11	0.00919894	0.938607
BnaA06g11400D	106351352	uncharacterized protein LOC106351352	AT4G29010.1	AIM1	Enoyl-CoA hydratase/isomerase family	K10527	JA metabolism	1.6123	-1.64698	-1.39781	0.784234	0.0656238	-0.179333	0.333032	0.443548	0.698071	0.12258	0.95513	0.936568
BnaC07g13070D	106370122	peroxisomal fatty acid beta-oxidation multifunctional protein AIM1-like][protein_id	AT4G29010.1	AIM1	Enoyl-CoA hydratase/isomerase family	K10527	JA metabolism	1.52455	0.77178	1.32852	0.994778	0.0679379	-0.141351	0.000253725	0.10586	0.167907	0.0236785	0.932752	0.983197
BnaC08g13270D	106415581	peroxisomal fatty acid beta-oxidation multifunctional protein AIM1][protein_id	AT4G29010.1	AIM1	Enoyl-CoA hydratase/isomerase family	K10527	JA metabolism	1.30212	-0.188801	0.678327	0.452877	-0.491966	-0.327374	4.61336e-06	0.657924	0.167477	0.171119	0.14649	0.673434
BnaC01g09510D	106375554	peroxisomal fatty acid beta-oxidation multifunctional protein AIM1][protein_id	AT4G29010.1	AIM1	Enoyl-CoA hydratase/isomerase family	K10527	JA metabolism	0.15588	-0.108036	0.0639457	0.237262	-0.0846195	0.38687	0.558094	0.753364	0.966676	0.379628	0.807136	0.351079
BnaA03g01000D	106398246	peroxisomal fatty acid beta-oxidation multifunctional protein AIM1][protein_id	AT4G29010.1	AIM1	Enoyl-CoA hydratase/isomerase family	K10527	JA metabolism	1.36e-06	0.00047044	0.0394536	2.41721	0.313218	-0.124005	1	1	1	0.0942998	0.876173	1
BnaA01g07910D	106398246	peroxisomal fatty acid beta-oxidation multifunctional protein AIM1][protein_id	AT4G29010.1	AIM1	Enoyl-CoA hydratase/isomerase family	K10527	JA metabolism	-0.232828	-1.06933	0.199066	0.380543	-0.142928	0.569436	0.728599	0.0816426	0.936046	0.55423	0.864477	0.62673
BnaA08g30740D	106361183	peroxisomal fatty acid beta-oxidation multifunctional protein AIM1][protein_id	AT4G29010.1	AIM1	Enoyl-CoA hydratase/isomerase family	K10527	JA metabolism	-0.609323	-0.607902	0.186646	-1.01659	-2.52516	-2.51092	0.501673	0.571515	0.980756	0.273619	0.00422951	0.0423021
BnaC07g41660D	106409243	peroxisomal fatty acid beta-oxidation multifunctional protein AIM1-like][protein_id	AT4G29010.1	AIM1	Enoyl-CoA hydratase/isomerase family	K10527	JA metabolism	-0.95404	-0.488536	0.926827	-0.548832	-0.559253	0.933399	0.0659363	0.460897	0.333185	0.355072	0.36462	0.509204
BnaCnng62430D	106389792	peroxisomal fatty acid beta-oxidation multifunctional protein AIM1-like][protein_id	AT4G29010.1	AIM1	Enoyl-CoA hydratase/isomerase family	K10527	JA metabolism	-1.51295	-1.10159	0.516218	-1.09015	-0.732876	0.657058	0.0126208	0.118278	0.714383	0.0969222	0.318323	0.654745
BnaA08g28040D	111199887	3-ketoacyl-CoA thiolase 1, peroxisomal-like	AT1G04710.1	PKT4	peroxisomal 3-ketoacyl-CoA thiolase 4	K07513	JA metabolism	0.249872	-0.390501	-0.145741	-0.0271939	-0.826925	-0.700075	0.567475	0.419491	0.924493	0.990796	0.0681174	0.319075
BnaC08g00920D	106424343	3-ketoacyl-CoA thiolase 1, peroxisomal	AT1G04710.1	PKT4	peroxisomal 3-ketoacyl-CoA thiolase 4	K07513	JA metabolism	0.226527	0.364504	0.152818	0.19033	0.0869496	0.341681	0.339899	0.151054	0.804695	0.474474	0.792291	0.456304
BnaC04g11470D	106401070	3-ketoacyl-CoA thiolase 2, peroxisomal] [exception	AT2G33150.1	PKT3	peroxisomal 3-ketoacyl-CoA thiolase 3	K07513	JA metabolism	1.77819	0.235302	0.0914447	0.696461	-0.0731681	0.103702	2.36038e-08	0.611153	0.969083	0.0466829	0.90169	0.964993
BnaA05g10480D	106401070	3-ketoacyl-CoA thiolase 2, peroxisomal] [exception	AT2G33150.1	PKT3	peroxisomal 3-ketoacyl-CoA thiolase 3	K07513	JA metabolism	0.592611	-0.0459972	-0.892996	0.609727	-1.13168	-1.42929	0.548257	0.988502	0.637521	0.568334	0.258303	0.369064
BnaC02g18580D	106377104	3-ketoacyl-CoA thiolase 2, peroxisomal-like	AT2G33150.1	PKT3	peroxisomal 3-ketoacyl-CoA thiolase 3	K07513	JA metabolism	0.344748	0.487399	0.752795	0.217645	0.622973	0.152073	0.331472	0.192834	0.314195	0.598603	0.0670593	0.951444
BnaC03g18470D	106388024	3-ketoacyl-CoA thiolase 2, peroxisomal	AT2G33150.1	PKT3	peroxisomal 3-ketoacyl-CoA thiolase 3	K07513	JA metabolism	0.129629	-0.675212	-0.364923	0.182273	-0.509627	0.0307347	0.897718	0.459813	0.869819	0.873639	0.580475	1
BnaC03g47990D	106452897	uncharacterized protein LOC106452897 isoform X1	AT2G33150.1	PKT3	peroxisomal 3-ketoacyl-CoA thiolase 3	K07513	JA metabolism	-0.310055	0.150792	0.603204	-0.758029	0.0635689	0.528699	0.375967	0.749742	0.2955	0.0193836	0.906943	0.428529
BnaA03g15290D	106437788	3-ketoacyl-CoA thiolase 2, peroxisomal-like	AT2G33150.1	PKT3	peroxisomal 3-ketoacyl-CoA thiolase 3	K07513	JA metabolism	-0.450157	-0.522695	0.168197	-0.660953	-0.592161	0.0692669	0.131723	0.10905	0.839389	0.0265539	0.0568611	0.988489
BnaC04g43560D	106377104	3-ketoacyl-CoA thiolase 2, peroxisomal-like	AT2G33150.1	PKT3	peroxisomal 3-ketoacyl-CoA thiolase 3	K07513	JA metabolism	-0.754151	-0.726969	0.332057	-0.482571	-1.26926	0.318551	0.0136259	0.0326159	0.629359	0.157093	6.1395e-05	0.669768
BnaA02g30470D	106403192	3-ketoacyl-CoA thiolase 5, peroxisomal isoform X1	AT5G48880.4	KAT5	peroxisomal 3-keto-acyl-CoA thiolase 2	K07513	JA metabolism	-1.14932	-1.08349	0.161125	-0.889032	-0.421485	0.851766	0.0104077	0.0281133	0.935383	0.065686	0.456006	0.273247
BnaC02g38800D	106382478	3-ketoacyl-CoA thiolase 5, peroxisomal-like isoform X1	AT5G48880.4	KAT5	peroxisomal 3-keto-acyl-CoA thiolase 2	K07513	JA metabolism	-1.24515	-1.13948	0.370974	-1.23203	-0.910501	1.0085	0.00298151	0.0125326	0.685894	0.00448834	0.047938	0.1118
BnaC04g50800D	106392009	jasmonic acid-amido synthetase JAR1-like	AT2G46370.2	JAR1	Auxin-responsive GH3 family protein	K14506	JA signaling	0.718669	0.25859	-0.272005	0.457337	0.346658	0.409121	0.0139179	0.515014	0.698186	0.161956	0.337507	0.529311
BnaC04g01170D	106415372	jasmonic acid-amido synthetase JAR1-like	AT2G46370.1	JAR1	Auxin-responsive GH3 family protein	K14506	JA signaling	0.688163	0.650385	0.960895	0.614911	0.765035	0.407086	0.0415785	0.0867741	0.0464931	0.0864931	0.0329447	0.600385
BnaA03g21360D	106438277	jasmonic acid-amido synthetase JAR1-like	AT2G46370.2	JAR1	Auxin-responsive GH3 family protein	K14506	JA signaling	0.383169	-0.809514	-1.71575	0.687892	0.566346	-0.314351	0.595786	0.285449	0.114488	0.335902	0.45731	0.928491
BnaA05g01450D	106446159	jasmonic acid-amido synthetase JAR1	AT2G46370.1	JAR1	Auxin-responsive GH3 family protein	K14506	JA signaling	0.200252	0.13619	0.286848	0.0880933	-0.128987	0.342488	0.510511	0.728075	0.607448	0.82668	0.731103	0.543854
BnaCnng59530D	106438298	jasmonic acid-amido synthetase JAR1-like	AT2G46370.1	JAR1	Auxin-responsive GH3 family protein	K14506	JA signaling	-0.099185	0.31274	0.519918	-0.203208	0.850241	0.0691689	0.811441	0.441093	0.414792	0.618585	0.00907568	1
BnaA04g29730D	106453225	jasmonic acid-amido synthetase JAR1-like	AT2G46370.1	JAR1	Auxin-responsive GH3 family protein	K14506	JA signaling	-0.641542	0.0233903	0.0966076	-0.560729	-0.338953	0.244221	0.00451971	0.964778	0.918214	0.0189596	0.199116	0.663749
BnaA03g56600D	106438060	coronatine-insensitive protein 1	AT2G39940.1	COI1	RNI-like superfamily protein	K13463	JA signaling	1.36475	0.766416	0.0377958	1.11868	1.02101	0.141037	3.90823e-06	0.0241878	1	0.000296946	0.00147094	0.916301
BnaC03g22310D	106420742	coronatine-insensitive protein 1-like	AT2G39940.1	COI1	RNI-like superfamily protein	K13463	JA signaling	0.829037	0.49097	0.143801	0.362744	0.267259	0.206102	0.00106887	0.100946	0.862745	0.220048	0.411128	0.773211
BnaA04g22740D	106353807	coronatine-insensitive protein 1-like	AT2G39940.1	COI1	RNI-like superfamily protein	K13463	JA signaling	0.0835964	-0.531204	0.224993	-0.0290515	-0.152539	-0.901954	0.91912	0.447446	0.893885	1	0.876242	0.330524
BnaC04g05430D	106450820	coronatine-insensitive protein 1	AT2G39940.1	COI1	RNI-like superfamily protein	K13463	JA signaling	-0.0955368	-0.243105	0.884966	0.188294	-0.436087	0.417274	0.829209	0.592026	0.0501129	0.678509	0.268406	0.575079
BnaA05g05650D	106396469	coronatine-insensitive protein 1-like	AT2G39940.1	COI1	RNI-like superfamily protein	K13463	JA signaling	-0.442457	-0.267603	0.19316	-0.834581	-0.707664	0.407693	0.0603057	0.358272	0.721009	0.000132177	0.00173394	0.300515
BnaA04g22750D	106353806	coronatine-insensitive protein 1-like	AT2G39940.1	COI1	RNI-like superfamily protein	K13463	JA signaling	-1.18224	-1.06584	0.0969852	-0.97619	-2.64223	0.0847867	0.0633153	0.109559	1	0.340853	0.00134768	1
BnaC04g19600D	106396469	coronatine-insensitive protein 1-like	AT2G39940.1	COI1	RNI-like superfamily protein	K13463	JA signaling	-1.92285	-1.14244	0.519775	-1.27748	-0.563717	0.50113	4.77898e-06	0.0119932	0.630054	0.00290473	0.259098	0.643823
BnaAnng41010D	106347328	protein TIFY 6B-like isoform X2	AT3G17860.2	JAZ3	jasmonate-zim-domain protein 3	K13464	JA signaling	2.69054	2.20464	0.0387314	1.95255	1.5044	0.132871	6.55764e-17	2.32653e-11	1	5.37583e-09	1.08924e-05	0.94305
BnaC05g35610D	106452030	protein TIFY 6B-like	AT3G17860.1	JAZ3	jasmonate-zim-domain protein 3	K13464	JA signaling	2.12408	1.44818	-0.17683	1.90396	1.23422	0.031437	3.19677e-07	0.001325	0.923021	6.96928e-06	0.00579393	1
BnaA01g27170D	106347362	protein TIFY 6B-like isoform X2	AT3G17860.1	JAZ3	jasmonate-zim-domain protein 3	K13464	JA signaling	2.09871	1.58372	-0.569241	1.5972	1.29021	0.334539	1.13558e-13	7.12374e-08	0.213752	5.26164e-08	1.79895e-05	0.627346
BnaC01g34620D	106435207	protein TIFY 6B-like isoform X2	AT3G17860.2	JAZ3	jasmonate-zim-domain protein 3	K13464	JA signaling	1.3884	1.49992	-0.702106	0.473119	0.923033	0.611676	0.000218768	0.000135206	0.2487	0.342751	0.0299504	0.425085
BnaA05g22360D	106390147	protein TIFY 6B	AT3G17860.1	JAZ3	jasmonate-zim-domain protein 3	K13464	JA signaling	1.16678	0.599475	-0.341507	0.959914	0.454633	0.281854	0.000375426	0.126397	0.649855	0.00494982	0.25142	0.785613
BnaC08g36840D	106368904	protein TIFY 10A-like	AT1G19180.3	JAZ1	jasmonate-zim-domain protein 1	K13464	JA signaling	2.21436	1.25614	-0.392172	0.0255516	-0.448564	0.121025	0.000336987	0.0745286	0.82865	1	0.584671	1
BnaA09g44300D	106369086	protein TIFY 10A-like	AT1G19180.3	JAZ1	jasmonate-zim-domain protein 1	K13464	JA signaling	1.02997	0.218925	-0.167037	2.47488	1.91431	0.194413	0.0830095	0.810423	0.966483	1.8803e-05	0.00134787	0.959802
BnaC05g28170D	106431861	protein TIFY 10A	AT1G19180.2	JAZ1	jasmonate-zim-domain protein 1	K13464	JA signaling	0.963267	0.760921	-0.247817	0.701785	0.361028	-0.501175	0.0134044	0.0898837	0.873325	0.0996154	0.462793	0.633467
BnaC05g14810D	111205530	protein TIFY 10A-like	AT1G19180.3	JAZ1	jasmonate-zim-domain protein 1	K13464	JA signaling	0.521355	-1.18209	-0.387953	-0.310807	-1.55254	-3.61433	0.633139	0.291353	0.909925	0.823973	0.13848	0.0132517
BnaA06g13250D	106397247	protein TIFY 10A isoform X1	AT1G19180.3	JAZ1	jasmonate-zim-domain protein 1	K13464	JA signaling	0.0107827	-0.187387	1.06576	-0.65293	-0.914016	0.387777	1	0.904151	0.584794	0.495938	0.332498	0.91482
BnaC08g18640D	106431861	protein TIFY 10A	AT1G19180.3	JAZ1	jasmonate-zim-domain protein 1	K13464	JA signaling	-0.65683	-1.02624	0.532598	-0.263369	-1.06145	-1.05624	0.230977	0.0753008	0.638434	0.709804	0.0592294	0.264954
BnaA08g22180D	106431861	protein TIFY 10A	AT1G19180.3	JAZ1	jasmonate-zim-domain protein 1	K13464	JA signaling	-0.725655	-0.922624	0.198919	-0.914328	-0.64634	0.476728	0.183457	0.120276	0.933409	0.100441	0.293496	0.733955
BnaA06g11690D	106351396	protein TIFY 11A-like	AT1G17380.1	JAZ5	jasmonate-zim-domain protein 5	K13464	JA signaling	2.40718	2.51321	-3.68441	-1.54099	1.53049	0.220343	0.154249	0.224644	0.297987	0.383749	0.253223	0.959302
BnaC05g13540D	106450176	protein TIFY 11A-like	AT1G17380.1	JAZ5	jasmonate-zim-domain protein 5	K13464	JA signaling	0.860741	-0.112974	-0.881701	0.176084	-0.542224	-0.364625	0.244538	0.93643	0.472385	0.873258	0.557345	0.851732
BnaA08g23150D	106387620	protein TIFY 11A-like	AT1G17380.1	JAZ5	jasmonate-zim-domain protein 5	K13464	JA signaling	-1.19921	-1.00794	0.0353843	-1.53295	-0.923376	0.169971	0.0181885	0.0778155	1	0.00509227	0.118469	0.958076
BnaC08g48340D	106358572	protein TIFY 11A-like	AT1G17380.2	JAZ5	jasmonate-zim-domain protein 5	K13464	JA signaling	-1.54917	-1.78357	-1.09913	-2.38347	-1.49944	-0.216653	0.064453	0.049958	0.453784	0.00464302	0.0908796	0.982583
BnaC08g37780D	106436837	protein TIFY 11A-like	AT1G17380.1	JAZ5	jasmonate-zim-domain protein 5	K13464	JA signaling	-1.58893	-1.67187	-0.295003	-1.96277	-1.66696	0.173987	0.0189912	0.0251811	0.89656	0.00478692	0.0224332	0.980223
BnaA07g28810D	106406284	protein TIFY 7	AT1G70700.1	TIFY7	TIFY domain/Divergent CCT motif family protein	K13464	JA signaling	2.02257	-0.360424	0.884181	-0.551697	-2.40892	-1.35168	0.0182154	0.778343	0.606936	0.612259	0.00992916	0.385521
BnaCnng65670D	106395195	protein TIFY 7 isoform X1	AT1G70700.1	TIFY7	TIFY domain/Divergent CCT motif family protein	K13464	JA signaling	1.58107	0.233016	-0.346455	-0.56451	-0.495603	0.227592	0.000292119	0.742794	0.714675	0.302201	0.41729	0.870437
BnaC06g24560D	106446486	protein TIFY 7 isoform X2	AT1G70700.1	TIFY7	TIFY domain/Divergent CCT motif family protein	K13464	JA signaling	1.20258	-0.535221	0.150191	0.172767	-0.499491	-0.157269	0.195067	0.695145	1	0.913045	0.692866	1
BnaC02g20120D	106381147	protein TIFY 7-like isoform X1	AT1G70700.1	TIFY7	TIFY domain/Divergent CCT motif family protein	K13464	JA signaling	0.75618	0.338833	-0.0187691	-0.347121	0.240579	0.460716	0.160497	0.643496	1	0.603505	0.752324	0.716254
BnaC06g31830D	106406284	protein TIFY 7	AT1G70700.1	TIFY7	TIFY domain/Divergent CCT motif family protein	K13464	JA signaling	0.479584	-1.3526	-0.0790017	-1.65623	-2.15839	-0.230549	0.34063	0.00654247	1	0.000479975	1.46814e-05	0.884459
BnaA07g23750D	106353800	protein TIFY 7	AT1G70700.1	TIFY7	TIFY domain/Divergent CCT motif family protein	K13464	JA signaling	-1.08465	-0.747703	-0.102698	-1.23023	-1.18578	0.171195	0.307592	0.580951	1	0.253966	0.304017	1
BnaA07g30200D	106354217	protein TIFY 11B	AT1G72450.1	JAZ6	jasmonate-zim-domain protein 6	K13464	JA signaling	3.22887	1.37222	-0.0398558	2.17738	1.67733	0.306638	1.04203e-10	0.0135511	1	1.38261e-05	0.00164042	0.847059
BnaA02g15990D	106446184	protein TIFY 11B-like	AT1G72450.1	JAZ6	jasmonate-zim-domain protein 6	K13464	JA signaling	1.30171	0.429636	0.265253	-0.994657	-1.39439	-0.198783	0.00569509	0.504014	0.850974	0.0772523	0.0110211	0.92563
BnaC02g45660D	106376719	protein TIFY 11B	AT1G72450.1	JAZ6	jasmonate-zim-domain protein 6	K13464	JA signaling	0.597331	-0.909157	-0.407926	-1.87209	-0.800106	0.210905	0.291658	0.139558	0.702973	0.00052316	0.189045	0.913426
BnaC06g33640D	106405682	protein TIFY 11B isoform X2	AT1G72450.1	JAZ6	jasmonate-zim-domain protein 6	K13464	JA signaling	-1.85474	-0.667194	0.391321	-2.13168	-0.393441	-0.058703	0.00230668	0.592884	0.745565	0.000478901	0.725473	1
BnaA07g31880D	106354531	protein TIFY 10B	AT1G74950.1	TIFY10B	TIFY domain/Divergent CCT motif family protein	K13464	JA signaling	2.61172	1.73467	0.0915735	1.49923	0.871385	0.474079	8.71976e-10	0.000132145	0.990657	0.000582907	0.0701562	0.643733
BnaC06g35750D	106406454	protein TIFY 10B-like isoform X2	AT1G74950.1	TIFY10B	TIFY domain/Divergent CCT motif family protein	K13464	JA signaling	1.94187	0.235154	0.0215842	1.0224	-0.236115	0.462446	3.44165e-09	0.62527	1	0.00308136	0.606429	0.521388
BnaC06g22690D	106387250	protein TIFY 10B-like isoform X1	AT1G74950.1	TIFY10B	TIFY domain/Divergent CCT motif family protein	K13464	JA signaling	0.103158	-0.165294	0.234333	-0.912474	-1.84055	0.249651	0.895729	0.860504	0.900477	0.13263	0.00240989	0.899919
BnaCnng08230D	111202931	protein TIFY 10B-like	AT1G74950.1	TIFY10B	TIFY domain/Divergent CCT motif family protein	K13464	JA signaling	-0.555678	-0.73112	0.213086	-1.01923	-1.01035	-0.176656	0.13819	0.0690165	0.828206	0.00515354	0.00733804	0.892601
BnaA02g17040D	111202931	protein TIFY 10B-like	AT1G74950.1	TIFY10B	TIFY domain/Divergent CCT motif family protein	K13464	JA signaling	-0.737569	-0.885716	-0.0429616	-1.78667	-0.82576	-0.167185	0.0329319	0.016582	1	1.04282e-07	0.0239897	0.901544
BnaA07g21960D	106353656	protein TIFY 10B-like isoform X1	AT1G74950.1	TIFY10B	TIFY domain/Divergent CCT motif family protein	K13464	JA signaling	-1.2538	-1.51305	0.183356	-1.34644	-1.52548	0.147884	0.16995	0.163723	0.984791	0.127959	0.100029	1
BnaA07g21950D	106353656	protein TIFY 10B-like isoform X2	AT1G74950.1	TIFY10B	TIFY domain/Divergent CCT motif family protein	K13464	JA signaling	-3.32294	-1.68931	0.348184	-3.40292	-0.130577	-0.414616	0.0537067	0.446943	0.936951	0.0193791	0.974033	0.913181
BnaC03g71460D	106454811	protein TIFY 9 isoform X1	AT5G13220.1	JAZ10	jasmonate-zim-domain protein 10	K13464	JA signaling	4.08945	3.06418	1.75072	4.24436	5.94073	-0.905101	0.00136352	0.0281497	0.442365	0.00141875	8.86663e-05	0.811559
BnaC02g04570D	106384060	protein TIFY 9-like isoform X1	AT5G13220.1	JAZ10	jasmonate-zim-domain protein 10	K13464	JA signaling	2.79128	-0.90912	2.65665	-1.24913	-0.0543751	0.638873	0.0320529	0.625585	0.244689	0.398449	1	0.895378
BnaA03g04250D	106454811	protein TIFY 9 isoform X1	AT5G13220.1	JAZ10	jasmonate-zim-domain protein 10	K13464	JA signaling	2.6751	0.405758	2.29756	5.82597	3.14125	-0.27826	0.0845	0.881222	0.402217	0.000521512	0.0812611	1
BnaA10g20060D	111198027	protein TIFY 9-like isoform X1	AT5G13220.1	JAZ10	jasmonate-zim-domain protein 10	K13464	JA signaling	1.94857	-0.933133	1.15794	0.636056	-0.114741	0.913156	0.0874766	0.580733	0.638434	0.661308	0.970869	0.773364
BnaA02g01520D	106384060	protein TIFY 9-like isoform X1	AT5G13220.1	JAZ10	jasmonate-zim-domain protein 10	K13464	JA signaling	1.14183	0.536208	1.24373	0.466014	-0.273932	-0.0379729	0.0551834	0.486103	0.206671	0.524263	0.750475	1
BnaC09g43860D	106372313	protein TIFY 9 isoform X1	AT5G13220.1	JAZ10	jasmonate-zim-domain protein 10	K13464	JA signaling	0.564093	-0.478057	1.05108	-0.168017	-0.264291	0.181624	0.446389	0.603024	0.365635	0.875304	0.789893	0.982167
BnaC09g36990D	106376408	protein TIFY 3B-like	AT5G20900.1	JAZ12	jasmonate-zim-domain protein 12	K13464	JA signaling	0.186173	0.102966	0.352361	-0.041	-0.0685696	0.190623	0.389668	0.721709	0.287675	0.904389	0.818703	0.71512
BnaA10g14660D	106371706	protein TIFY 3B-like	AT5G20900.1	JAZ12	jasmonate-zim-domain protein 12	K13464	JA signaling	-0.0427834	-0.278977	0.678694	-0.572443	-0.575584	0.227086	0.918034	0.438238	0.0795042	0.053116	0.0594379	0.762484
BnaA02g05120D	106425723	protein TIFY 3B-like	AT5G20900.1	JAZ12	jasmonate-zim-domain protein 12	K13464	JA signaling	-0.268901	-0.0531389	0.488591	-0.041176	0.0731348	0.316333	0.396814	0.920686	0.300109	0.946076	0.878332	0.630697
BnaA05g18020D	106436996	transcription factor MYC2-like	AT1G32640.1	MYC2	Basic helix-loop-helix (bHLH) DNA-binding family protein	K13422	JA signaling	-0.919656	-1.69481	-0.331758	-1.4771	-1.41243	-0.0976782	0.0163088	1.44551e-05	0.697115	9.56231e-05	0.000295127	0.983714
BnaC08g07580D	111212520	transcription factor MYC2-like	AT1G32640.1	MYC2	Basic helix-loop-helix (bHLH) DNA-binding family protein	K13422	JA signaling	-1.04222	-0.779676	-0.691529	-1.47197	-0.953467	0.662385	0.0477147	0.202133	0.478424	0.0053845	0.0946906	0.563888
BnaC05g28450D	106436996	transcription factor MYC2-like	AT1G32640.1	MYC2	Basic helix-loop-helix (bHLH) DNA-binding family protein	K13422	JA signaling	-1.49507	-1.41701	-0.189702	-1.91276	-1.52532	0.111399	6.98952e-08	1.07538e-06	0.802741	9.01404e-12	1.04418e-07	0.938632

## Sheet: SA+SL
ID	KEGG_ID	HitDesc	AGI	symbol	description	KEGG_Ath	pathway	logFC Root_H4h_AV	logFC Root_H24h_AV	logFC Leaf_H24h_AV	logFC Root_H4h_ZS	logFC Root_H24h_ZS	logFC Leaf_H24h_ZS	FDR Root_H4h_AV	FDR Root_H24h_AV	FDR Leaf_H24h_AV	FDR Root_H4h_ZS	FDR Root_H24h_ZS	FDR Leaf_H24h_ZS
BnaA08g14460D	106361344	regulatory protein NPR1-like	AT1G64280.1	NPR1	regulatory protein (NPR1)	K14508	SA signaling	0.818079	0.462122	-0.502175	1.01463	1.27306	-0.00047548	0.0435991	0.362777	0.575953	0.0194194	0.00511654	1
BnaA08g14450D	106361344	regulatory protein NPR1-like	AT1G64280.1	NPR1	regulatory protein (NPR1)	K14508	SA signaling	0.642209	0.325205	-0.290103	0.575342	0.22882	0.389798	0.00495732	0.246457	0.528059	0.0224856	0.453082	0.419567
BnaC08g12110D	106429517	regulatory protein NPR1	AT1G64280.1	NPR1	regulatory protein (NPR1)	K14508	SA signaling	0.0487339	-0.202154	-0.323776	-0.0162805	-0.0504697	0.0872799	0.898963	0.574232	0.51937	0.994565	0.920088	0.95732
BnaC01g18080D	106376076	regulatory protein NPR1-like	AT1G64280.1	NPR1	regulatory protein (NPR1)	K14508	SA signaling	-0.0109046	0.0756216	0.360768	0.16053	0.0206886	0.148778	0.982755	0.827299	0.340471	0.553119	0.970638	0.82213
BnaA01g15290D	106444456	regulatory protein NPR1	AT1G64280.1	NPR1	regulatory protein (NPR1)	K14508	SA signaling	-0.0147022	-0.0449309	0.239255	0.235308	0.392607	0.221064	0.967061	0.89728	0.568624	0.294311	0.064155	0.664131
BnaA09g11550D	106452668	regulatory protein NPR1-like	AT1G64280.1	NPR1	regulatory protein (NPR1)	K14508	SA signaling	-0.780557	1.22533	0.846468	0.516355	0.812331	0.0699005	0.0904566	0.0196094	0.125285	0.382604	0.19143	1
BnaC09g12000D	106389246	regulatory protein NPR1 isoform X2	AT1G64280.1	NPR1	regulatory protein (NPR1)	K14508	SA signaling	-0.984841	2.17868	-0.112823	-0.133963	1.46434	0.132511	0.338812	0.146452	0.942817	0.912797	0.307634	0.944762
BnaA04g23860D	106431086	regulatory protein NPR5	AT2G41370.1	BOP2	Ankyrin repeat family protein / BTB/POZ domain-containing protein	K14508	SA signaling	-0.237441	-0.548967	0.114263	0.146127	-0.445534	0.775831	0.672019	0.338734	0.992543	0.836677	0.437302	0.504959
BnaC04g47620D	106394350	regulatory protein NPR5	AT2G41370.1	BOP2	Ankyrin repeat family protein / BTB/POZ domain-containing protein	K14508	SA signaling	-0.706242	0.0304248	0.884133	-0.301878	0.157196	0.0482056	0.097541	0.979379	0.51786	0.560456	0.801334	1
BnaC01g18130D	106390207	regulatory protein NPR2	AT4G26120.1		Ankyrin repeat family protein / BTB/POZ domain-containing protein	K14508	SA signaling	1.88894	1.27522	0.151198	1.81975	1.02241	0.479388	1.47278e-09	0.000161887	0.944739	8.74905e-09	0.00249787	0.567083
BnaA01g15310D	106444435	regulatory protein NPR2	AT4G26120.1		Ankyrin repeat family protein / BTB/POZ domain-containing protein	K14508	SA signaling	1.57073	1.00182	-1.05254	1.51705	0.964598	1.12983	0.000123287	0.0318246	0.437713	0.000323419	0.0354057	0.415395
BnaAnng05410D	106386375	regulatory protein NPR3 isoform X1	AT5G45110.2	NPR3	NPR1-like protein 3	K14508	SA signaling	-0.263937	-0.566059	0.331771	0.218124	-0.451915	-0.503108	0.542252	0.196523	0.714142	0.661003	0.311226	0.558937
BnaC07g02890D	106391283	regulatory protein NPR3-like isoform X1	AT5G45110.2	NPR3	NPR1-like protein 3	K14508	SA signaling	-1.83688	-0.627461	0.591848	-0.845881	-0.622965	0.116217	1.22464e-06	0.163866	0.430761	0.0410068	0.156815	0.975321
BnaA02g23720D	106437691	regulatory protein NPR3-like isoform X1	AT5G45110.2	NPR3	NPR1-like protein 3	K14508	SA signaling	-3.46448	-1.31848	-0.730427	-1.22602	-2.03959	1.83904	1.36165e-06	0.0754883	0.646779	0.107623	0.0077303	0.144408
BnaC01g12020D	106365916	regulatory protein NPR4-like	AT4G19660.1	NPR4	NPR1-like protein 4	K14508	SA signaling	-0.402385	-0.0962174	0.195015	0.0606362	-0.127333	-0.00782168	0.107043	0.798593	0.756058	0.879938	0.707703	1
BnaA01g10220D	106437694	regulatory protein NPR4	AT4G19660.1	NPR4	NPR1-like protein 4	K14508	SA signaling	-0.842112	-0.137308	-0.269959	0.0246675	0.202361	-0.0122945	0.0695753	0.855297	0.83722	0.997466	0.758236	1
BnaA09g36500D	106364931	regulatory protein NPR6	AT3G57130.1	BOP1	Ankyrin repeat family protein / BTB/POZ domain-containing protein	K14508	SA signaling	-1.44616	-1.51416	-0.616674	-1.0989	-1.45859	0.373169	0.00279363	0.00446546	0.744492	0.031316	0.0045823	0.880052
BnaC04g24530D	106436045	regulatory protein NPR6-like	AT3G57130.1	BOP1	Ankyrin repeat family protein / BTB/POZ domain-containing protein	K14508	SA signaling	-2.5691	-1.75533	0.00403139	-2.2679	-1.90149	0.674434	8.35975e-08	0.000207634	1	1.74584e-06	3.82416e-05	0.511915
BnaC02g43620D	106382900	transcription factor TGA1	AT5G65210.7	TGA1	bZIP transcription factor family protein	K14431	SA signaling	0.822092	0.302513	-0.115727	-0.329001	-0.0780773	0.195914	0.00285831	0.40592	0.966417	0.318937	0.868213	0.900707
BnaAnng04710D	106377387	coatomer subunit beta'-3-like isoform X2	AT5G65210.6	TGA1	bZIP transcription factor family protein	K14431	SA signaling	0.611816	-0.0761121	-2.34389	-0.391237	0.264841	-1.74297	0.125539	0.919091	0.144296	0.385619	0.620986	0.312165
BnaAnng04720D	106382900	transcription factor TGA1	AT5G65210.7	TGA1	bZIP transcription factor family protein	K14431	SA signaling	0.167151	-0.327574	-0.481894	-0.139239	0.206994	-0.761076	0.70853	0.494828	0.699779	0.791954	0.680941	0.56588
BnaC03g49070D	106347995	transcription factor TGA1	AT5G65210.7	TGA1	bZIP transcription factor family protein	K14431	SA signaling	-0.566431	-0.617287	0.15745	-0.793489	-0.412877	0.394208	0.0792815	0.0824767	0.888415	0.0138084	0.267699	0.597313
BnaA06g24140D	106347995	transcription factor TGA1	AT5G65210.7	TGA1	bZIP transcription factor family protein	K14431	SA signaling	-0.972727	-0.710529	-0.0227528	-1.11299	-0.478787	0.233664	0.000540726	0.0243189	1	9.67177e-05	0.146145	0.770119
BnaC09g06840D	106362534	transcription factor TGA1-like	AT5G65210.7	TGA1	bZIP transcription factor family protein	K14431	SA signaling	-1.28906	-0.699691	0.0526638	-0.961524	-0.37192	0.46193	1.95071e-06	0.0232436	1	0.000650118	0.268406	0.477005
BnaA09g07120D	106382900	transcription factor TGA1	AT5G65210.7	TGA1	bZIP transcription factor family protein	K14431	SA signaling	-1.5759	-0.748361	0.064031	-1.31625	-0.527448	0.188219	7.46304e-08	0.0250941	1	1.19687e-05	0.126126	0.8941
BnaC07g14080D	106401946	transcription factor TGA3	AT1G22070.1	TGA3	transcription factor TGA3	K14431	SA signaling	0.658633	0.52704	0.615068	0.265572	-0.0219674	-0.173986	0.390229	0.632837	0.835821	0.806002	1	1
BnaA08g20970D	106425973	transcription factor TGA3-like isoform X1	AT1G22070.1	TGA3	transcription factor TGA3	K14431	SA signaling	0.4462	0.166451	0.0246866	0.517478	0.737502	1.23083	0.560963	0.882826	1	0.524894	0.353085	0.600506
BnaC05g17700D	106401946	transcription factor TGA3	AT1G22070.1	TGA3	transcription factor TGA3	K14431	SA signaling	0.379717	0.546283	0.690096	0.179308	0.152713	-0.362522	0.382132	0.247036	0.301962	0.744766	0.79639	0.725771
BnaA09g30910D	106451231	transcription factor TGA3-like	AT1G22070.1	TGA3	transcription factor TGA3	K14431	SA signaling	0.174779	0.228238	0.536402	0.294123	0.741893	0.731627	0.618572	0.57607	0.31962	0.398625	0.0166981	0.142002
BnaC07g14090D	106399780	transcription factor TGA3-like	AT1G22070.1	TGA3	transcription factor TGA3	K14431	SA signaling	0.164443	1.06071	-0.401446	0.495121	0.462401	0.212646	0.805597	0.111099	0.847863	0.43479	0.551707	0.976908
BnaC08g20170D	106425973	transcription factor TGA3-like isoform X1	AT1G22070.1	TGA3	transcription factor TGA3	K14431	SA signaling	-0.657267	-0.750042	0.0566756	-0.399414	0.0329772	0.188729	0.133289	0.125743	1	0.426005	0.980951	0.927592
BnaA10g24020D	106419049	transcription factor TGA2	AT5G06950.5	AHBP-1B	bZIP transcription factor family protein	K14431	SA signaling	0.436698	0.409316	-0.0319503	0.713027	0.25289	0.0505512	0.185786	0.284559	1	0.0389582	0.556984	1
BnaC09g48640D	106446065	transcription factor TGA2	AT5G06950.5	AHBP-1B	bZIP transcription factor family protein	K14431	SA signaling	0.147632	0.183619	-0.15704	0.160342	0.153483	0.0452347	0.626744	0.599988	0.844876	0.631817	0.660782	1
BnaA02g00310D	106383049	transcription factor TGA4	AT5G10030.2	TGA4	TGACG motif-binding factor 4	K14431	SA signaling	-1.31641	-0.0819101	0.0466981	-1.24402	-0.995926	-0.190675	0.00425105	0.926802	1	0.00918637	0.0494607	0.929694
BnaC09g46670D	106426688	transcription factor TGA4-like	AT5G10030.2	TGA4	TGACG motif-binding factor 4	K14431	SA signaling	-1.42652	-0.960198	-0.259571	-1.22545	-0.747404	0.703763	1.94762e-07	0.00133133	0.69805	1.33827e-05	0.0136768	0.118529
BnaA10g22150D	111212031	transcription factor TGA4-like	AT5G10030.2	TGA4	TGACG motif-binding factor 4	K14431	SA signaling	-1.47866	-0.751169	0.209885	-0.333638	-0.91896	-0.261996	0.000579317	0.139879	0.89541	0.547528	0.057803	0.865187
BnaC02g00560D	106416410	transcription factor TGA4-like isoform X1	AT5G10030.2	TGA4	TGACG motif-binding factor 4	K14431	SA signaling	-1.885	-0.421425	-0.0423135	-1.27604	0.201099	0.705146	0.107693	0.810013	1	0.325232	0.923549	0.835434
BnaC06g20630D	106353466	transcription factor TGA7-like isoform X2	AT1G77920.1	TGA7	bZIP transcription factor family protein	K14431	SA signaling	0.130776	-0.426361	0.101073	0.0564913	-0.2	0.138568	0.595145	0.0711224	0.877001	0.867675	0.449532	0.811559
BnaA07g33790D	106400213	transcription factor TGA7-like	AT1G77920.1	TGA7	bZIP transcription factor family protein	K14431	SA signaling	-0.725168	0.18346	1.04887	-0.170361	0.0630381	0.628962	0.0231075	0.694557	0.0216175	0.702896	0.917284	0.346618
BnaC06g38430D	106354586	transcription factor TGA7-like	AT1G77920.1	TGA7	bZIP transcription factor family protein	K14431	SA signaling	-0.910475	-0.261412	0.808882	-0.469661	0.307468	1.07401	0.00327283	0.54414	0.0967388	0.180623	0.436367	0.0166783
BnaA07g20770D	106353450	transcription factor TGA7-like isoform X2	AT1G77920.1	TGA7	bZIP transcription factor family protein	K14431	SA signaling	-1.78846	-0.946144	0.219639	-1.83598	-0.646547	1.23695	0.000443369	0.11569	0.919974	0.00043916	0.298051	0.139729
BnaA05g26790D	106452396	transcription factor TGA6 isoform X1	AT3G12250.6	TGA6	TGACG motif-binding factor 6	K14431	SA signaling	0.699094	0.254521	-0.0649885	0.47473	0.164905	-0.0479784	0.00323487	0.427602	0.989493	0.0727702	0.621775	1
BnaC05g40810D	106435410	transcription factor TGA6-like isoform X6	AT3G12250.4	TGA6	TGACG motif-binding factor 6	K14431	SA signaling	0.395325	0.449875	0.336815	0.320798	0.468075	-0.299437	0.281896	0.290847	0.711937	0.438662	0.251808	0.811844
BnaA01g30760D	106351867	transcription factor TGA6 isoform X1	AT3G12250.6	TGA6	TGACG motif-binding factor 6	K14431	SA signaling	0.0601733	0.643887	-0.020555	0.292222	0.796777	0.968133	0.93696	0.28043	1	0.640315	0.139405	0.30653
BnaA03g32170D	106400758	transcription factor TGA6	AT3G12250.6	TGA6	TGACG motif-binding factor 6	K14431	SA signaling	-0.111273	-0.140934	0.0323118	-0.173357	-0.423172	0.148425	0.67017	0.642898	1	0.517281	0.0715724	0.862807
BnaC03g37460D	106400758	transcription factor TGA6	AT3G12250.6	TGA6	TGACG motif-binding factor 6	K14431	SA signaling	-0.32234	-0.275168	-0.052129	-0.365935	-0.591757	-0.0315363	0.125233	0.260412	0.991574	0.097148	0.00486499	1
BnaCnng22950D	106418554	transcription factor TGA6 isoform X2	AT3G12250.6	TGA6	TGACG motif-binding factor 6	K14431	SA signaling	-0.35484	-1.48596	-1.48333	1.41406	-6.8179	-6.27939	0.908591	0.60506	0.777469	0.497149	0.0250151	0.233015
BnaC05g06030D	106412233	transcription factor TGA9 isoform X1	AT1G08320.3	TGA9	bZIP transcription factor family protein	K14431	SA signaling	0.0772431	0.229108	0.0737955	-0.112659	0.519682	0.0570355	0.896125	0.703356	1	0.86448	0.286568	1
BnaA06g04770D	106346343	transcription factor TGA9-like isoform X1	AT1G08320.3	TGA9	bZIP transcription factor family protein	K14431	SA signaling	0.00995403	-0.00791303	0.525435	-0.378843	0.470222	0.3084	0.996956	1	0.681405	0.397146	0.293008	0.873027
BnaA09g48940D	106420023	transcription factor TGA9 isoform X1	AT1G08320.3	TGA9	bZIP transcription factor family protein	K14431	SA signaling	-0.255881	0.818535	-0.00301766	-0.683567	1.18417	2.53582	0.43756	0.0107991	1	0.0234823	6.79715e-05	0.625314
BnaC08g43230D	106377038	transcription factor TGA9-like isoform X1	AT1G08320.3	TGA9	bZIP transcription factor family protein	K14431	SA signaling	-0.746743	0.338457	-2.06144	-0.90437	0.333593	-2.95618	0.0606515	0.516853	0.436272	0.0260489	0.500698	0.569263
BnaC08g43220D	106377038	transcription factor TGA9-like isoform X1	AT1G08320.3	TGA9	bZIP transcription factor family protein	K14431	SA signaling	-1.81151	-0.274988	-0.11069	-0.97726	-0.0569577	0.0456573	0.0101134	0.80899	1	0.216129	0.978213	1
BnaA10g24100D	106419453	transcription factor TGA10 isoform X1	AT5G06839.3	TGA10	bZIP transcription factor family protein	K14431	SA signaling	0.432319	0.173616	1.85915	0.73152	0.268796	-1.46568	0.174125	0.693769	0.638434	0.0197949	0.492118	0.836638
BnaCnng67350D	106448281	transcription factor TGA10-like isoform X2	AT5G06839.3	TGA10	bZIP transcription factor family protein	K14431	SA signaling	0.397625	-0.26708	-0.00911277	0.341336	0.102037	-2.14546	0.247399	0.541579	1	0.374768	0.843542	0.725771
BnaUnng03970D	106448281	transcription factor TGA10-like isoform X2	AT5G06839.3	TGA10	bZIP transcription factor family protein	K14431	SA signaling	0.131115	-0.33307	0.824582	0.280614	0.175771	0.474948	0.742597	0.425778	0.885791	0.465834	0.692243	0.96668
BnaC09g48720D	106448281	transcription factor TGA10-like isoform X2	AT5G06839.3	TGA10	bZIP transcription factor family protein	K14431	SA signaling	0.0158772	-0.0941472	1.83916	0.443993	0.147941	1.09041	0.978283	0.833216	0.638434	0.132275	0.696668	0.880543
BnaAnng01920D	106422605	transcription factor TGA5	AT5G06960.2	OBF5	OCS-element binding factor 5	K14431	SA signaling	1.68494	0.504201	0.0664803	-0.657607	-1.47591	-2.73075	0.0634565	0.681405	1	0.548782	0.14172	0.0374138
BnaC02g01780D	106397420	transcription factor TGA5	AT5G06960.2	OBF5	OCS-element binding factor 5	K14431	SA signaling	-0.986608	-0.647928	0.134967	-0.31475	0.0992393	0.87735	0.153264	0.446756	0.993248	0.729741	0.940686	0.547605
BnaC08g03660D	106413785	pathogenesis-related protein 1-like	AT2G14610.1	PR1	pathogenesis-related protein 1	K13449	SA signaling	0.00811823	-0.00757107	2.11712	0.00574273	0.00184119	0.517023	1	1	0.0038414	1	1	0.638495
BnaC08g03670D	106413785	pathogenesis-related protein 1-like	AT2G14610.1	PR1	pathogenesis-related protein 1	K13449	SA signaling	0.00126191	-0.00182536	2.40806	0.0226041	0.00892009	0.19549	1	1	0.104224	1	1	0.968253
BnaA03g38630D	106439741	pathogenesis-related protein 1	AT2G14610.1	PR1	pathogenesis-related protein 1	K13449	SA signaling	-0.0170225	0.00265716	-0.111876	2.15893	-0.0831185	-0.675892	1	1	0.94214	0.360175	1	0.90462
BnaC03g45470D	106437008	pathogenesis-related protein 1	AT2G14610.1	PR1	pathogenesis-related protein 1	K13449	SA signaling	-0.0517207	-2.9136	-0.236978	-0.0316659	-0.0107018	-0.120662	1	0.168013	0.967219	1	1	1
BnaA03g50570D	106444787	pathogenesis-related protein 1-like	AT4G33720.1		CAP (Cysteine-rich secretory proteins, Antigen 5, and Pathogenesis-related 1 protein) superfamily protein	K13449	SA signaling	2.75421	2.88007	-0.167375	0.0654669	1.81483	0.108377	0.0111258	0.0076085	1	1	0.401738	1
BnaA03g50560D	106444787	pathogenesis-related protein 1-like	AT4G33720.1		CAP (Cysteine-rich secretory proteins, Antigen 5, and Pathogenesis-related 1 protein) superfamily protein	K13449	SA signaling	1.22148	3.91413	-0.0755622	-0.186631	1.39688	-1.46909	0.18428	3.01799e-05	1	0.915134	0.189125	0.838184
BnaC01g04530D	106365193	pathogenesis-related protein 1-like	AT4G33720.1		CAP (Cysteine-rich secretory proteins, Antigen 5, and Pathogenesis-related 1 protein) superfamily protein	K13449	SA signaling	0.755254	1.45107	0.886285	-0.385554	-2.1392	0.65274	0.472127	0.188146	0.748145	0.771596	0.0429996	0.884532
BnaA03g52720D	106444786	pathogenesis-related protein 1-like	AT4G33720.1		CAP (Cysteine-rich secretory proteins, Antigen 5, and Pathogenesis-related 1 protein) superfamily protein	K13449	SA signaling	0.576819	3.77186	2.27463	1.47789	3.17245	-1.4863	0.349638	2.71041e-10	0.638434	0.0112191	4.20305e-08	0.835927
BnaA01g03260D	106370793	pathogenesis-related protein 1	AT4G33720.1		CAP (Cysteine-rich secretory proteins, Antigen 5, and Pathogenesis-related 1 protein) superfamily protein	K13449	SA signaling	0.149254	1.13605	1.63011	-0.913115	1.90135	0.285889	0.792855	0.0165624	0.298127	0.0483024	1.84907e-05	0.933974
BnaA03g52700D	106444787	pathogenesis-related protein 1-like	AT4G33720.1		CAP (Cysteine-rich secretory proteins, Antigen 5, and Pathogenesis-related 1 protein) superfamily protein	K13449	SA signaling	0.116302	2.34373	-0.0257045	0.531707	1.29575	2.51135	0.885522	0.000107209	1	0.457449	0.0401575	0.627213
BnaC06g03200D	106424442	pathogenesis-related leaf protein 6	AT1G50060.1		CAP (Cysteine-rich secretory proteins, Antigen 5, and Pathogenesis-related 1 protein) superfamily protein	K13449	SA signaling	-2.16682	-1.67626	0.0234767	-2.80345	-2.04323	-0.0204225	0.129688	0.293649	1	0.0476105	0.168491	1
BnaA07g09290D	106424439	pathogenesis-related protein 1-like	AT1G50060.1		CAP (Cysteine-rich secretory proteins, Antigen 5, and Pathogenesis-related 1 protein) superfamily protein	K13449	SA signaling	-4.02601	-0.972833	-0.00734782	-1.70215	-1.21584	-0.0111841	0.000122538	0.389419	1	0.130258	0.260439	1
BnaA01g03250D	106370805	pathogenesis-related protein 1	AT4G33730.1		CAP (Cysteine-rich secretory proteins, Antigen 5, and Pathogenesis-related 1 protein) superfamily protein	K13449	SA signaling	-1.28891	-2.78199	-0.0262174	-1.38481	-1.25749	-0.0153919	0.123979	0.00327122	1	0.111724	0.181943	1
BnaC01g04510D	111214004	pathogenesis-related protein 1-like	AT4G33730.1		CAP (Cysteine-rich secretory proteins, Antigen 5, and Pathogenesis-related 1 protein) superfamily protein	K13449	SA signaling	-1.96989	-2.10858	-0.00711532	-0.321285	-1.27552	-0.0195496	0.00688106	0.0149519	1	0.757928	0.131011	1
BnaA03g52710D	106444785	pathogenesis-related protein 1	AT4G33710.1		CAP (Cysteine-rich secretory proteins, Antigen 5, and Pathogenesis-related 1 protein) superfamily protein	K13449	SA signaling	0.87311	3.78344	0.00404445	0.145005	4.97136	-0.0102192	0.498682	0.00243868	1	0.966172	0.00651001	1
BnaA03g52740D	106444785	pathogenesis-related protein 1	AT4G33710.1		CAP (Cysteine-rich secretory proteins, Antigen 5, and Pathogenesis-related 1 protein) superfamily protein	K13449	SA signaling	0.676498	2.14862	2.06056	0.719356	0.590048	-2.07506	0.440845	0.0125413	0.494833	0.442756	0.568464	0.734389
BnaC07g44430D	106444785	pathogenesis-related protein 1	AT4G33710.1		CAP (Cysteine-rich secretory proteins, Antigen 5, and Pathogenesis-related 1 protein) superfamily protein	K13449	SA signaling	-0.0656575	0.535695	0.878375	0.191387	-0.00885134	0.20198	0.939361	0.452083	0.606831	0.816127	1	0.992838
BnaA09g51010D	106369285	beta-carotene isomerase D27, chloroplastic-like	AT1G03055.1	D27	beta-carotene isomerase D27-like protein	K17911	SL biosynthesis	-0.725353	-1.04454	-0.0445473	0.204258	-0.638411	-0.358775	0.196374	0.107967	1	0.866627	0.509063	0.68548
BnaC08g45810D	106402766	beta-carotene isomerase D27, chloroplastic	AT1G03055.1	D27	beta-carotene isomerase D27-like protein	K17911	SL biosynthesis	-1.40012	0.141888	-0.0760383	-0.253937	0.0209397	0.343621	0.00874812	0.870366	0.991871	0.689556	1	0.716254
