# Supplementary material for: Transcriptional Response of Two Brassica napus Cultivars to Short-Term Hypoxia in the Root Zone
Source: Front Plant Sci. 2022 Apr 29;13:897673. doi: 10.3389/fpls.2022.897673 (PMC9100894; doi:10.3389/fpls.2022.897673)
Supplement: Supplementary file 8 [file Data_Sheet_8.XLSX]

## Sheet: TableS7A
Supporting information
Table S7A: Statistics for enrichment of affected genes (hypergeometric distributions)
	p-values calculated by the phyper function in R
	gray p-values are not significant (p > 0.05)
affected genes
	Guo et al. 2020		number of transcripts in seedlings of B. napus, cv. ZS11, treated with 12 h flooding
	Li et al. 2021 - T		number of transcripts in seedlings of B. napus, cv. Santana, treated with 6 h flooding
	Li et al. 2021 - S		number of transcripts in seedlings of B. napus, cv. 23651, treated with 6 h flooding
sample size		number of transcripts in B. napus that were significantly regulated under root hypoxia
sample affected genes		overlap between sample size and affected genes
		AV	Avatar
		ZS	Zhongshuang 9
	total number of genes	total number of affected genes	sample size	sample affected genes	p-value (phyper)			total number of genes	total number of affected genes	sample size	sample affected genes	p-value (phyper)
treatment		up in Guo et al. 2020					treatment		down in Guo et al. 2020
R4h up AV	63569	3384	5736	1003	5.06798e-277		R4h up AV	63569	6832	5736	489	1
R4h down AV	63569	3384	8983	232	1		R4h down AV	63569	6832	8983	2076	8.19847e-300
R4h up ZS	63569	3384	3948	815	4.09436e-270		R4h up ZS	63569	6832	3948	263	1
R4h down ZS	63569	3384	7010	175	1		R4h down ZS	63569	6832	7010	1718	8.19992e-272
R24h up AV	63569	3384	2550	491	2.39238e-143		R24h up AV	63569	6832	2550	139	1
R24h down AV	63569	3384	4415	192	0.999046		R24h down AV	63569	6832	4415	1192	2.57455e-218
R24h up ZS	63569	3384	3061	596	1.08294e-178		R24h up ZS	63569	6832	3061	159	1
R24h down ZS	63569	3384	5619	182	1		R24h down ZS	63569	6832	5619	1484	5.44249e-267
L24h up AV	63569	3384	341	18	0.548795		L24h up AV	63569	6832	341	71	3.90153e-08
L24h down AV	63569	3384	564	68	3.84248e-10		L24h down AV	63569	6832	564	28	1
L24h up ZS	63569	3384	112	23	2.15933e-08		L24h up ZS	63569	6832	112	14	0.316199
L24h down ZS	63569	3384	418	19	0.791005		L24h down ZS	63569	6832	418	24	0.999881
treatment		up in Li et al. 2021 - T					treatment		down in Li et al. 2021 - T
R4h up AV	63569	1945	5736	787	1.250E-318		R4h up AV	63569	2625	5736	83	1
R4h down AV	63569	1945	8983	100	1		R4h down AV	63569	2625	8983	1043	5.44224e-241
R4h up ZS	63569	1945	3948	614	4.85522e-269		R4h up ZS	63569	2625	3948	68	1
R4h down ZS	63569	1945	7010	95	1		R4h down ZS	63569	2625	7010	817	7.89967e-180
R24h up AV	63569	1945	2550	375	3.23291e-148		R24h up AV	63569	2625	2550	59	1
R24h down AV	63569	1945	4415	152	0.0703303		R24h down AV	63569	2625	4415	518	2.77426e-108
R24h up ZS	63569	1945	3061	418	1.77153e-154		R24h up ZS	63569	2625	3061	61	1
R24h down ZS	63569	1945	5619	145	0.988384		R24h down ZS	63569	2625	5619	573	1.77523e-95
L24h up AV	63569	1945	341	32	2.78326e-08		L24h up AV	63569	2625	341	19	0.116612
L24h down AV	63569	1945	564	4	0.999974		L24h down AV	63569	2625	564	13	0.993259
L24h up ZS	63569	1945	112	18	9.46172e-09		L24h up ZS	63569	2625	112	2	0.948378
L24h down ZS	63569	1945	418	0	1		L24h down ZS	63569	2625	418	13	0.883528
treatment		up in Li et al. 2021 - S					treatment		down in Li et al. 2021 - S
R4h up AV	63569	2575	5736	1140	0		R4h up AV	63569	4246	5736	117	1
R4h down AV	63569	2575	8983	106	1		R4h down AV	63569	4246	8983	1762	0
R4h up ZS	63569	2575	3948	936	0		R4h up ZS	63569	4246	3948	85	1
R4h down ZS	63569	2575	7010	102	1		R4h down ZS	63569	4246	7010	1419	0
R24h up AV	63569	2575	2550	618	2.231E-310		R24h up AV	63569	4246	2550	42	1
R24h down AV	63569	2575	4415	102	1		R24h down AV	63569	4246	4415	982	6.86556e-273
R24h up ZS	63569	2575	3061	692	0		R24h up ZS	63569	4246	3061	54	1
R24h down ZS	63569	2575	5619	100	1		R24h down ZS	63569	4246	5619	1166	1.30479e-300
L24h up AV	63569	2575	341	22	0.022619		L24h up AV	63569	4246	341	34	0.0132421
L24h down AV	63569	2575	564	10	0.999289		L24h down AV	63569	4246	564	19	0.999809
L24h up ZS	63569	2575	112	14	0.000179859		L24h up ZS	63569	4246	112	6	0.766122
L24h down ZS	63569	2575	418	2	0.999999		L24h down ZS	63569	4246	418	20	0.956686

## Sheet: TableS7B
Supporting information
Table S7B: Core response of rapeseed to hypoxia (induced genes)
	Table is a subset of Table S2
	all genes with significant induction in root samples from this study as well as the studies from Guo et al. 2020 and Li et al. 2021 were chosen
	Column M-O: data are taken from from Mustroph et al. 2010
	Column P-Q: data are taken from from Lee and Bailey-Serres 2019
ID	ID	QueryLength	Arabidopsis_regulation	HitAcc	symbol	description		HitLength	eValue	AGI	Affy ID	count hypoxia up	count hypoxia down	Hypoxia core	AGI	Lee 2019 count_up	Lee 2019 count_down	ID	logFC Root_H4h_AV	logFC Root_H24h_AV	logFC Leaf_H24h_AV	logFC Root_H4h_ZS	logFC Root_H24h_ZS	logFC Leaf_H24h_ZS	FDR Root_H4h_AV	FDR Root_H24h_AV	FDR Leaf_H24h_AV	FDR Root_H4h_ZS	FDR Root_H24h_ZS	FDR Leaf_H24h_ZS	ID	log2.FC 12 h ZS11	pval	log2FC_6 h Santana	padj	log2FC_6h 23651	padj
BnaA04g09690D	GSBRNA2T00114271001	846	HRG	AT5G39890.1	PCO2	2-aminoethanethiol dioxygenase, putative (DUF1637)	Chr5:15974270-15976270 FORWARD LENGTH=1361	1361	0	AT5G39890	249384_at	56	0	HRG	AT5G39890	3	0	BnaA04g09690D	7.42643	6.1853	-1.07034	6.82263	5.78534	0.640371	8.36833e-56	1.107e-42	0.227298	8.86992e-50	5.42642e-39	0.618081	BnaA04g09690D	1.64174	1.59114e-13	1.05491	5.78e-29	2.08654	6.62e-23
BnaCnng47880D	GSBRNA2T00046848001	858	HRG	AT5G39890.1	PCO2	2-aminoethanethiol dioxygenase, putative (DUF1637)	Chr5:15974270-15976270 FORWARD LENGTH=1361	1361	0	AT5G39890	249384_at	56	0	HRG	AT5G39890	3	0	BnaCnng47880D	6.18259	4.88431	0.425815	5.76144	4.92613	-0.268339	4.6248e-67	1.1895e-46	0.618747	1.97039e-60	1.50883e-47	0.811844	BnaCnng47880D	1.44233	7.96299e-11	1.0271	7.71e-25	1.75659	1.97e-60
BnaA03g45530D	GSBRNA2T00106849001	1353	HRG	AT4G22780.2	ACR7	ACT domain repeat 7	Chr4:11968276-11971357 REVERSE LENGTH=2052	2052	0	AT4G22780	254300_at	45	0	HRG	AT4G22780	3	0	BnaA03g45530D	3.30201	2.00171	0.433719	2.47356	2.02973	0.108882	2.1987e-14	8.0955e-06	0.650165	8.34111e-09	4.76612e-06	0.988498	BnaA03g45530D	2.97536	3.1446e-32	3.01845	3.35e-181	4.18387	1.16e-161
BnaC07g37570D	GSBRNA2T00157036001	1353	HRG	AT4G22780.2	ACR7	ACT domain repeat 7	Chr4:11968276-11971357 REVERSE LENGTH=2052	2052	0	AT4G22780	254300_at	45	0	HRG	AT4G22780	3	0	BnaC07g37570D	3.19465	2.19806	0.553134	2.99815	2.47616	0.215616	5.19391e-11	1.57674e-05	0.590837	9.26025e-10	8.13282e-07	0.918962	BnaC07g37570D	3.50696	8.15143e-37	3.01218	1.41e-152	4.99155	3.27e-84
BnaA05g32500D	GSBRNA2T00076108001	480	hypoxia-induced	AT3G03270.2		Adenine nucleotide alpha hydrolases-like superfamily protein	Chr3:761004-763369 REVERSE LENGTH=1906	1906	0	AT3G03270	258879_at	52	0		AT3G03270	3	0	BnaA05g32500D	4.17479	1.72533	0.744389	3.83096	2.0782	0.311038	1.14366e-51	1.18375e-10	0.0698646	6.90971e-45	4.21866e-15	0.641881	BnaA05g32500D	1.768	3.1102e-18	1.46934	1.33e-44	1.97328	3.03e-188
BnaA08g23190D	GSBRNA2T00103004001	1629	HRG	AT1G17290.1	AlaAT1	alanine aminotransferas	Chr1:5922332-5926400 FORWARD LENGTH=2378	2378	0	AT1G17290	260847_s_at	33	0	HRG	AT1G17290	3	0	BnaA08g23190D	10.2106	9.43727	-0.183624	8.64788	7.94782	-0.111725	6.59788e-25	6.36924e-22	0.980845	4.02082e-20	1.87961e-17	1	BnaA08g23190D	1.99582	8.53269e-31	1.89508	1.21e-58	4.05699	0
BnaC06g14270D	GSBRNA2T00071328001	1077	hypoxia-induced	AT3G52930.1	FBA8	Aldolase superfamily protein	Chr3:19626748-19629204 REVERSE LENGTH=2042	2042	0	AT3G52930	252022_at	2	1		AT3G52930	0	0	BnaC06g14270D	2.47114	1.99511	-0.240414	2.65575	2.22796	-0.169579	2.63959e-15	5.23456e-10	0.763297	3.3767e-17	2.57498e-12	0.880581	BnaC06g14270D	1.02246	2.29514e-11	1.13443	1.54e-28	1.59883	1.86e-131
BnaC08g12490D	GSBRNA2T00104493001	753	HRG	AT4G27450.1		aluminum induced protein with YGL and LRDR motifs	Chr4:13727370-13729002 REVERSE LENGTH=1367	1367	0	AT4G27450	253874_at	52	0	HRG	AT4G27450	3	0	BnaC08g12490D	8.34277	6.04579	0.687806	7.29444	5.48501	0.216152	6.16035e-32	6.42746e-20	0.578762	1.09498e-26	1.99732e-17	0.947969	BnaC08g12490D	2.05234	3.76104e-23	1.20337	5.2e-26	2.98801	1.79e-74
BnaA08g14100D	GSBRNA2T00078867001	753	HRG	AT4G27450.1		aluminum induced protein with YGL and LRDR motifs	Chr4:13727370-13729002 REVERSE LENGTH=1367	1367	0	AT4G27450	253874_at	52	0	HRG	AT4G27450	3	0	BnaA08g14100D	6.28255	3.87276	1.15816	5.70916	4.56056	-0.107356	2.84928e-14	1.51445e-06	0.367474	2.12409e-12	1.59559e-08	1	BnaA08g14100D	1.64518	1.11089e-13	2.11832	1.99e-91	3.03263	6.64e-164
BnaA09g54170D	GSBRNA2T00097488001	2136	hypoxia-induced	AT4G01360.1	BPS3	BPS1-like protein	Chr4:564760-566408 FORWARD LENGTH=1484	1484	0	AT4G01360					AT4G01360	3	0	BnaA09g54170D	8.51834	8.20479	0.924453	8.67303	8.13791	-1.48198	3.27907e-24	1.21288e-21	0.68156	1.68097e-24	4.39895e-22	0.492426	BnaA09g54170D	7.16549	4.62614e-33	2.74105	6.12e-136	7.99013	2.87e-106
BnaA02g09840D	GSBRNA2T00041442001	1296	hypoxia-induced	AT5G54130.2		Calcium-binding endonuclease/exonuclease/phosphatase family	Chr5:21962570-21965623 FORWARD LENGTH=1985	1985	0	AT5G54130	248191_at	22	0		AT5G54130	1	0	BnaA02g09840D	3.63589	2.24115	-1.09798	3.43671	2.3482	-0.117548	2.87424e-19	4.36423e-08	0.0431672	2.41648e-17	7.75515e-09	0.973026	BnaA02g09840D	2.67628	1.35306e-22	1.45546	1.93e-47	2.56123	1.33e-19
BnaC04g56800D	GSBRNA2T00022381001	678	hypoxia-induced	AT2G41010.1	CAMBP25	calmodulin (CAM)-binding protein of 25 kDa	Chr2:17113798-17115047 REVERSE LENGTH=1250	1250	3e-153	AT2G41010	267069_at	7	2		AT2G41010	2	0	BnaC04g56800D	3.14118	2.17135	1.488	2.72666	2.36806	0.53629	1.75599e-06	0.00290304	0.202078	4.27148e-05	0.000722281	0.797035	BnaC04g56800D	2.27483	2.38131e-15	3.37161	5.45e-103	2.17255	1.13e-40
BnaC06g32130D	GSBRNA2T00103142001	507	hypoxia-induced	AT1G71000.1		Chaperone DnaJ-domain superfamily protein	Chr1:26768792-26770175 REVERSE LENGTH=1106	1106	3e-152	AT1G71000	262307_at	9	0		AT1G71000	0	0	BnaC06g32130D	3.66713	5.28372	-0.709463	2.66994	5.35482	-1.05682	2.85617e-06	2.33024e-09	0.728285	0.00115592	4.13294e-08	0.74101	BnaC06g32130D	3.89721	9.17809e-12	2.53151	1.38e-117	4.91101	1.68e-47
BnaC05g40060D	GSBRNA2T00023790001	486	hypoxia-induced	AT3G13310.1		Chaperone DnaJ-domain superfamily protein	Chr3:4310544-4311629 REVERSE LENGTH=1086	1086	2e-115	AT3G13310	257654_at	42	0		AT3G13310	3	0	BnaC05g40060D	3.90107	3.10203	0.398122	3.26482	3.26044	0.309818	1.47137e-18	3.37765e-12	0.695415	8.60344e-14	2.32259e-13	0.810407	BnaC05g40060D	3.00235	3.04032e-53	2.57661	1.44e-108	3.09853	0
BnaA10g13660D	GSBRNA2T00096444001	888	hypoxia-induced	AT5G22920.1		CHY-type/CTCHY-type/RING-type Zinc finger protein	Chr5:7664871-7667288 FORWARD LENGTH=1405	1405	0	AT5G22920	249862_at	18	1		AT5G22920	1	0	BnaA10g13660D	11.2606	10.2524	-0.439115	10.4688	11.4793	0.323557	8.36833e-56	1.02774e-47	0.872044	3.45827e-51	3.72603e-52	0.916974	BnaA10g13660D	3.46697	3.28516e-10	1.08187	1.86e-14	3.7541	4.21e-40
BnaC08g12310D	GSBRNA2T00104463001	858		AT4G26780.1	AR192	Co-chaperone GrpE family protein	Chr4:13484839-13486858 REVERSE LENGTH=1509	1509	0	AT4G26780	253949_at	1	4		AT4G26780	0	0	BnaC08g12310D	2.10368	1.22035	0.494032	1.51458	1.0877	0.213604	9.25116e-09	0.00238505	0.56241	5.35232e-05	0.00582604	0.881044	BnaC08g12310D	2.93366	6.0877e-35	1.07295	1.49e-08	1.94397	6.65e-16
BnaC03g49620D	GSBRNA2T00141780001	1260	hypoxia-induced	AT5G64660.1	CMPG2	CYS, MET, PRO, and GLY protein 2	Chr5:25841913-25843555 REVERSE LENGTH=1643	1643	0	AT5G64660	247240_at	11	0		AT5G64660	0	0	BnaC03g49620D	1.40574	1.34532	-0.276402	1.29138	1.42272	-0.301572	0.00129795	0.00487712	0.84331	0.00443721	0.00217347	0.838087	BnaC03g49620D	3.48876	4.85199e-58	2.07108	7.63e-94	3.85028	3.72e-195
BnaC06g31680D	GSBRNA2T00049676001	6642	hypoxia-induced	AT1G70530.1	CRK3	cysteine-rich RLK (RECEPTOR-like protein kinase) 3	Chr1:26588391-26591776 REVERSE LENGTH=2697	2697	0	AT1G70530	260362_at	19	1		AT1G70530	1	0	BnaC06g31680D	2.94102	2.08312	0.282791	2.67089	2.00951	0.151681	6.18979e-22	2.4247e-11	0.705888	2.01231e-18	8.93283e-11	0.905718	BnaC06g31680D	2.00062	3.93885e-19	2.04468	3.59e-65	3.78334	3.69e-72
BnaA06g38070D	GSBRNA2T00054636001	1425	hypoxia-induced	AT1G12740.1	CYP87A2	cytochrome P450, family 87, subfamily A, polypeptide 2	Chr1:4342209-4344875 FORWARD LENGTH=1978	1978	0	AT1G12740	255934_at	5	2		AT1G12740	0	0	BnaA06g38070D	3.20504	2.40588	0.030525	3.98521	2.80321	-2.19732	6.76174e-17	2.12776e-09	1	7.47348e-26	3.8236e-13	0.725771	BnaA06g38070D	4.44167	8.02714e-16	1.0496	1.42e-10	2.68134	2.12e-40
BnaA03g19470D	GSBRNA2T00058402001	441	hypoxia-induced	AT2G41430.4	ERD15	dehydration-induced protein (ERD15)	Chr2:17269232-17270542 FORWARD LENGTH=1224	1224	2e-108	AT2G41430	267104_at	12	0		AT2G41430	3	0	BnaA03g19470D	3.03633	2.68838	1.57346	2.16488	2.66719	0.493055	5.52001e-14	8.74335e-11	0.00179393	7.84018e-08	9.66201e-11	0.591801	BnaA03g19470D	1.32729	2.76664e-14	1.53567	1.86e-53	2.73117	0
BnaA06g13740D	GSBRNA2T00043019001	336	HRG	AT1G19530.2		DNA polymerase epsilon catalytic subunit A	Chr1:6763915-6764989 FORWARD LENGTH=654	654	3e-99	AT1G19530	260668_at	47	0	HRG	AT1G19530	3	0	BnaA06g13740D	3.79594	3.17341	0.71233	2.54645	2.70147	1.40498	5.21684e-19	1.26145e-13	0.638434	9.99252e-10	2.20789e-10	0.148572	BnaA06g13740D	2.5503	4.97979e-27	1.45942	2.47e-39	3.03337	3.5e-76
BnaC03g77910D	GSBRNA2T00008218001	585	hypoxia-induced	AT1G51700.1	DOF1	DOF zinc finger protein 1	Chr1:19173880-19175228 FORWARD LENGTH=1349	1349	6e-117	AT1G51700	256185_at	2	2		AT1G51700	0	0	BnaC03g77910D	4.35205	2.72472	-0.474098	4.59856	3.71349	0.596452	1.68122e-12	2.02836e-05	0.746905	3.19515e-13	6.89865e-09	0.689417	BnaC03g77910D	2.76906	4.26536e-27	2.54089	1.56e-81	5.6537	5.7e-79
BnaA08g01830D	GSBRNA2T00085759001	603	hypoxia-induced	AT1G51700.1	DOF1	DOF zinc finger protein 1	Chr1:19173880-19175228 FORWARD LENGTH=1349	1349	1e-126	AT1G51700	256185_at	2	2		AT1G51700	0	0	BnaA08g01830D	4.00078	3.48573	0.126011	3.93061	2.95603	0.452428	7.48892e-22	3.71354e-16	0.961585	5.33424e-21	1.85414e-12	0.646684	BnaA08g01830D	2.90121	1.70611e-09	3.04482	4.49e-127	4.85358	5.74e-173
BnaA07g24230D	GSBRNA2T00124299001	1161	hypoxia-induced	AT1G69570.1		Dof-type zinc finger DNA-binding family protein	Chr1:26161528-26163715 REVERSE LENGTH=1928	1928	0	AT1G69570	259834_at	3	4		AT1G69570	0	1	BnaA07g24230D	4.87017	2.86885	0.32183	4.65745	3.45535	0.758604	2.19682e-25	8.00562e-11	0.809993	3.51264e-23	4.54893e-15	0.419967	BnaA07g24230D	2.49081	5.12766e-05	2.24886	4.25e-31	3.19897	1e-23
BnaAnng01320D	GSBRNA2T00119678001	975	hypoxia-induced	AT5G05410.1	DREB2A	DRE-binding protein 2A	Chr5:1602205-1604112 FORWARD LENGTH=1651	1651	0	AT5G05410	250781_at	33	0		AT5G05410	3	0	BnaAnng01320D	4.87946	3.0664	-0.46178	3.87325	2.87174	-2.23389	8.17476e-12	2.96622e-05	0.918298	3.25426e-08	5.99053e-05	0.29962	BnaAnng01320D	8.1974	1.1482e-112	6.04433	2.02e-70	7.44931	8.56e-87
BnaC09g49920D	GSBRNA2T00106944001	1005	hypoxia-induced	AT5G05410.1	DREB2A	DRE-binding protein 2A	Chr5:1602205-1604112 FORWARD LENGTH=1651	1651	7e-170	AT5G05410	250781_at	33	0		AT5G05410	3	0	BnaC09g49920D	3.78302	2.1036	-0.197066	2.81348	2.7406	0.130598	1.4434e-10	0.000794736	0.96341	1.40324e-06	5.65816e-06	1	BnaC09g49920D	6.63308	7.73056e-81	5.88657	4.8e-263	5.95119	0
BnaA07g08440D	GSBRNA2T00089886001	507	hypoxia-induced	AT1G28370.2	ERF11	ERF domain protein 11	Chr1:9955816-9956980 REVERSE LENGTH=1165	1165	4e-100	AT1G28370	261470_at	4	0		AT1G28370	2	0	BnaA07g08440D	2.87012	2.13976	0.334988	2.83214	1.97287	0.918561	4.45176e-11	3.06885e-06	0.837908	1.08903e-10	1.27702e-05	0.398168	BnaA07g08440D	4.31042	4.47006e-17	1.58093	1.59e-27	3.52896	2.5e-34
BnaCnng67070D	GSBRNA2T00096854001	507	hypoxia-induced	AT1G28370.2	ERF11	ERF domain protein 11	Chr1:9955816-9956980 REVERSE LENGTH=1165	1165	7e-97	AT1G28370	261470_at	4	0		AT1G28370	2	0	BnaCnng67070D	2.09209	1.68135	0.789667	2.09408	2.13545	0.507784	3.79021e-13	3.02835e-08	0.226187	4.88181e-13	5.20799e-13	0.542721	BnaCnng67070D	3.42018	2.60752e-30	1.4409	5.35e-19	3.58228	3.2e-29
BnaC09g38470D	GSBRNA2T00078484001	1152	hypoxia-induced	AT5G19120.1		Eukaryotic aspartyl protease family protein	Chr5:6414488-6415907 FORWARD LENGTH=1420	1420	0	AT5G19120	249923_at	31	0		AT5G19120	2	0	BnaC09g38470D	7.29637	4.82392	-0.225491	6.28272	5.07256	-0.0204206	9.78669e-28	1.10541e-14	0.932318	2.35482e-22	1.50699e-15	1	BnaC09g38470D	3.90329	4.51006e-51	2.67774	4.29e-98	4.02649	6.08e-104
BnaA10g15920D	GSBRNA2T00154337001	1143	hypoxia-induced	AT5G19120.1		Eukaryotic aspartyl protease family protein	Chr5:6414488-6415907 FORWARD LENGTH=1420	1420	0	AT5G19120	249923_at	31	0		AT5G19120	2	0	BnaA10g15920D	6.36725	4.74884	0.569152	5.04741	4.7461	0.0808783	9.10866e-26	3.42469e-16	0.638434	2.49027e-18	3.41419e-16	1	BnaA10g15920D	3.07392	7.27757e-40	2.00349	1.5e-11	4.14749	0
BnaA07g25000D	GSBRNA2T00124412001	231	hypoxia-induced	AT2G14247.1		Expressed protein	Chr2:6034282-6035375 FORWARD LENGTH=1094	1094	2e-47	AT2G14247					AT2G14247	3	0	BnaA07g25000D	10.6623	9.46349	-0.614305	11.7016	7.07785	-0.665081	2.55714e-15	1.38103e-12	0.898214	1.51015e-16	7.57735e-09	0.902854	BnaA07g25000D	4.11941	2.33851e-16	1.25525	1.09e-26	4.61998	1.18e-95
BnaC06g40570D	GSBRNA2T00068867001	1080	hypoxia-induced	AT1G80440.1		Galactose oxidase/kelch repeat superfamily protein	Chr1:30241452-30243176 FORWARD LENGTH=1725	1725	0	AT1G80440	260287_at	18	0		AT1G80440	1	0	BnaC06g40570D	3.4662	2.51345	0.155461	2.16059	1.83102	0.261232	9.94864e-10	2.21287e-05	0.974608	0.0001296	0.00187072	0.910369	BnaC06g40570D	2.63392	7.38837e-35	3.55285	2.5e-204	3.62898	5e-27
BnaA05g02300D	GSBRNA2T00132782001	1467	hypoxia-induced	AT2G41640.1		Glycosyltransferase family 61 protein	Chr2:17360374-17362601 FORWARD LENGTH=1993	1993	0	AT2G41640	245119_at	17	2		AT2G41640	0	0	BnaA05g02300D	3.81598	1.94467	0.293065	3.52035	2.33042	0.478388	3.03016e-12	0.000691621	0.872173	1.278e-10	2.70462e-05	0.727542	BnaA05g02300D	3.15494	1.25228e-49	1.93188	8.22e-78	4.14661	9.74e-180
BnaA07g03790D	GSBRNA2T00093269001	483	HRG	AT2G16060.1	HB1	hemoglobin 1	Chr2:6982531-6983777 REVERSE LENGTH=989	989	0	AT2G16060	263096_at	52	0	HRG	AT2G16060	3	0	BnaA07g03790D	7.15329	6.21527	-0.154755	7.91994	6.37704	0.4875	3.33396e-16	6.88989e-13	0.99791	2.40496e-18	1.95052e-13	0.862174	BnaA07g03790D	2.5501	1.80706e-22	1.18201	1.73e-25	3.61153	0
BnaC05g26650D	GSBRNA2T00124203001	1497	hypoxia-induced	AT1G50460.1	HKL1	hexokinase-like 1	Chr1:18693644-18697706 FORWARD LENGTH=2161	2161	0	AT1G50460	261851_at	4	0		AT1G50460	0	0	BnaC05g26650D	3.63795	1.43227	-1.07214	3.21943	1.86414	-0.223512	9.98235e-14	0.00617887	0.456393	4.87474e-11	0.000198756	0.977198	BnaC05g26650D	2.25665	2.15169e-17	1.49756	3.38e-17	2.25854	1.49e-22
BnaA08g02130D	GSBRNA2T00081329001	1467	hypoxia-induced	AT1G50460.1	HKL1	hexokinase-like 1	Chr1:18693644-18697706 FORWARD LENGTH=2161	2161	0	AT1G50460	261851_at	4	0		AT1G50460	0	0	BnaA08g02130D	2.76632	1.15094	0.319214	2.69413	1.46457	0.0113976	1.81236e-12	0.00999057	0.78927	9.47626e-12	0.000458489	1	BnaA08g02130D	2.52522	3.57622e-18	1.78078	3.19e-22	3.12624	1.46e-37
BnaA02g17000D	GSBRNA2T00083143001	669	hypoxia-induced	AT1G74840.2		Homeodomain-like superfamily protein	Chr1:28115908-28117405 REVERSE LENGTH=1101	1101	8e-148	AT1G74840	262166_at	3	1		AT1G74840	0	0	BnaA02g17000D	3.63928	5.21358	-0.678749	3.55958	4.89918	0.785897	2.31672e-24	2.08742e-42	0.845733	1.89422e-23	8.94989e-39	0.717251	BnaA02g17000D	3.0629	7.32667e-06	1.18102	1.54e-31	1.86253	1.5e-11
BnaA03g34150D	GSBRNA2T00137530001	402		AT3G16360.2	AHP4	HPT phosphotransmitter 4	Chr3:5554197-5555789 FORWARD LENGTH=863	863	4e-168	AT3G16360	259329_at	0	0		AT3G16360	0	0	BnaA03g34150D	11.0245	10.3998	4.54472	8.35117	11.11	3.4947	3.57924e-17	3.07626e-14	0.000113335	1.36376e-14	5.45919e-16	0.0023465	BnaA03g34150D	2.80023	4.8929e-14	1.04916	1.36e-21	2.81092	4.83e-75
BnaA02g05360D	GSBRNA2T00001330001	750	hypoxia-induced	AT5G21940.1		hybrid signal transduction histidine kinase M-like protein	Chr5:7249014-7250770 REVERSE LENGTH=1644	1644	0	AT5G21940					AT5G21940	1	0	BnaA02g05360D	4.59837	3.01071	0.833902	3.15644	2.95685	0.338075	4.7167e-29	5.31149e-14	0.171068	1.08211e-15	1.36931e-13	0.74563	BnaA02g05360D	3.78496	6.0272e-48	2.54229	8.04e-132	3.31239	2.53e-295
BnaC01g42000D	GSBRNA2T00013787001	519	hypoxia-induced	AT3G02555.2		hypothetical protein	Chr3:539611-541523 REVERSE LENGTH=1378	1378	7e-97	AT3G02555	258493_at	35	0		AT3G02555	3	0	BnaC01g42000D	6.4021	5.58986	0.234604	5.86139	5.01574	0.076598	3.34591e-29	2.83646e-23	0.905042	1.01753e-25	7.09141e-20	1	BnaC01g42000D	1.10271	1.62512e-05	1.44639	2.29e-05	2.33884	6.82e-25
BnaC03g37520D	GSBRNA2T00110649001	795	hypoxia-induced	AT3G12320.3		hypothetical protein	Chr3:3923969-3925469 FORWARD LENGTH=1082	1082	0	AT3G12320	256266_at	7	6		AT3G12320	0	1	BnaC03g37520D	3.96296	1.99994	-0.00936876	2.59057	1.85307	-0.0783295	4.40955e-25	4.011e-08	1	4.2973e-11	3.81559e-07	0.996039	BnaC03g37520D	3.17814	1.96543e-11	1.17043	0.0267648	2.50115	7.9e-07
BnaA03g05830D	GSBRNA2T00130096001	543	hypoxia-induced	AT5G16110.1		hypothetical protein	Chr5:5260522-5262840 REVERSE LENGTH=1556	1556	3e-145	AT5G16110	246506_at	2	0		AT5G16110	0	1	BnaA03g05830D	3.808	2.31943	0.475515	3.29542	2.22949	0.706821	6.6651e-16	1.44887e-06	0.638434	1.80563e-12	2.63719e-06	0.446207	BnaA03g05830D	1.56675	7.75901e-08	1.26594	1.24e-26	3.86657	5.54e-177
BnaC03g49100D	GSBRNA2T00079279001	219	hypoxia-induced	AT5G65207.1		hypothetical protein	Chr5:26052200-26052717 REVERSE LENGTH=518	518	6e-55	AT5G65207					AT5G65207	3	0	BnaC03g49100D	6.32529	6.25989	-0.05101	6.29712	6.70969	0.36886	9.95417e-15	1.27191e-13	1	1.96204e-14	5.76426e-15	0.928221	BnaC03g49100D	6.75721	1.0418e-101	1.03548	1.49e-16	6.36765	5.31e-95
BnaAnng04700D	GSBRNA2T00064750001	219	hypoxia-induced	AT5G65207.1		hypothetical protein	Chr5:26052200-26052717 REVERSE LENGTH=518	518	1e-63	AT5G65207					AT5G65207	3	0	BnaAnng04700D	4.67856	3.67489	1.27907	3.91245	4.66643	0.0829422	1.35124e-13	1.0218e-08	0.232607	3.47005e-10	1.05221e-12	1	BnaAnng04700D	3.00915	7.49928e-37	1.16988	1.07e-23	4.72723	0
BnaC02g43600D	GSBRNA2T00055818001	219	hypoxia-induced	AT5G65207.1		hypothetical protein	Chr5:26052200-26052717 REVERSE LENGTH=518	518	2e-60	AT5G65207					AT5G65207	3	0	BnaC02g43600D	2.88471	2.66916	3.12931	2.05039	3.22313	0.509136	3.25709e-06	5.58014e-05	0.442278	0.00118796	1.32475e-06	0.964926	BnaC02g43600D	1.32956	2.71708e-05	1.0577	3e-14	2.53295	3.7e-52
BnaA09g30920D	GSBRNA2T00079623001	912	hypoxia-induced	AT1G23710.1		hypothetical protein (DUF1645)	Chr1:8385188-8386522 FORWARD LENGTH=1335	1335	3e-154	AT1G23710	265184_at	30	0		AT1G23710	3	0	BnaA09g30920D	2.14513	1.35598	1.09322	1.7459	1.67311	0.562765	1.19032e-07	0.00238622	0.0990972	2.45313e-05	9.78532e-05	0.571255	BnaA09g30920D	2.31464	2.54248e-21	2.77639	1.44e-108	3.88449	5.35e-160
BnaA02g34370D	GSBRNA2T00047471001	1146		AT5G64750.1	ABR1	Integrase-type DNA-binding superfamily protein	Chr5:25891449-25893888 FORWARD LENGTH=1638	1638	0	AT5G64750					AT5G64750	0	0	BnaA02g34370D	6.47429	4.81905	3.60017	5.87881	5.10403	0.309159	7.44662e-07	0.000329691	0.0827094	7.93957e-06	0.000181589	1	BnaA02g34370D	2.96002	1.32864e-05	2.22406	1.11e-17	5.21184	1.02e-15
BnaC02g43290D	GSBRNA2T00086262001	1149		AT5G64750.1	ABR1	Integrase-type DNA-binding superfamily protein	Chr5:25891449-25893888 FORWARD LENGTH=1638	1638	0	AT5G64750					AT5G64750	0	0	BnaC02g43290D	5.56625	3.6941	0.549035	4.85748	3.16365	-0.954506	2.02912e-07	0.000674995	0.845952	5.29006e-06	0.00287225	0.689417	BnaC02g43290D	2.90189	3.54211e-07	1.58715	1.5e-10	4.24421	1.5e-22
BnaA04g29310D	GSBRNA2T00008106001	1011		AT2G40340.3	DREB2C	Integrase-type DNA-binding superfamily protein	Chr2:16848160-16850487 REVERSE LENGTH=1532	1532	1e-123	AT2G40340					AT2G40340	0	0	BnaA04g29310D	6.78305	5.80057	0.451062	5.73465	7.24624	2.12598	1.51913e-14	1.99099e-10	0.950799	1.71281e-11	1.67114e-13	0.240293	BnaA04g29310D	8.49057	1.2775e-118	5.68051	0	7.67923	2.04e-194
BnaC04g47060D	GSBRNA2T00155125001	642		AT2G40340.6	DREB2C	Integrase-type DNA-binding superfamily protein	Chr2:16848389-16850487 REVERSE LENGTH=1479	1479	5e-93	AT2G40340					AT2G40340	0	0	BnaC04g47060D	7.78289	7.42006	-0.0589369	5.63471	8.63277	2.5289	3.72316e-15	2.18923e-11	1	2.87121e-09	3.19375e-10	0.628674	BnaC04g47060D	9.60281	8.4658e-172	5.01158	2.27e-264	8.29869	1.13e-128
BnaA04g27050D	GSBRNA2T00003368001	591	HRG	AT2G47520.1	ERF71	Integrase-type DNA-binding superfamily protein	Chr2:19502776-19503702 REVERSE LENGTH=843	843	1e-75	AT2G47520	245173_at	51	0	HRG	AT2G47520	3	0	BnaA04g27050D	9.40887	7.9822	-3.56913	10.0289	7.84682	-0.0323626	9.59681e-55	5.84697e-43	0.308969	1.0049e-55	8.33619e-43	1	BnaA04g27050D	3.4226	1.79075e-22	1.14213	1.77e-38	2.73057	5.8e-61
BnaC07g31340D	GSBRNA2T00021519001	597	hypoxia-induced	AT5G61590.1		Integrase-type DNA-binding superfamily protein	Chr5:24764256-24765511 REVERSE LENGTH=1256	1256	0	AT5G61590	247540_at	23	0		AT5G61590	0	0	BnaC07g31340D	2.73967	1.76133	1.18422	1.64048	1.28128	-0.645024	7.59416e-10	0.000231588	0.0931453	0.000291149	0.00773508	0.52583	BnaC07g31340D	1.44866	1.5093e-09	2.29095	8.21e-51	3.14427	3.21e-66
BnaC05g35610D	GSBRNA2T00101752001	1008	HRG	AT3G17860.1	JAZ3	jasmonate-zim-domain protein 3	Chr3:6119707-6123044 FORWARD LENGTH=1673	1673	0	AT3G17860	258189_at	34	0	HRG	AT3G17860	2	0	BnaC05g35610D	2.12408	1.44818	-0.17683	1.90396	1.23422	0.031437	3.19677e-07	0.001325	0.923021	6.96928e-06	0.00579393	1	BnaC05g35610D	1.98022	8.9572e-25	1.884	1.13e-63	2.58455	3.26e-258
BnaA01g27170D	GSBRNA2T00005482001	1062	HRG	AT3G17860.1	JAZ3	jasmonate-zim-domain protein 3	Chr3:6119707-6123044 FORWARD LENGTH=1673	1673	0	AT3G17860	258189_at	34	0	HRG	AT3G17860	2	0	BnaA01g27170D	2.09871	1.58372	-0.569241	1.5972	1.29021	0.334539	1.13558e-13	7.12374e-08	0.213752	5.26164e-08	1.79895e-05	0.627346	BnaA01g27170D	2.49366	2.99196e-11	1.45255	8.2e-35	1.34824	4.7e-12
BnaAnng41010D	GSBRNA2T00028451001	468	HRG	AT3G17860.2	JAZ3	jasmonate-zim-domain protein 3	Chr3:6120029-6123012 FORWARD LENGTH=2395	2395	2e-159	AT3G17860	258189_at	34	0	HRG	AT3G17860	2	0	BnaAnng41010D	2.69054	2.20464	0.0387314	1.95255	1.5044	0.132871	6.55764e-17	2.32653e-11	1	5.37583e-09	1.08924e-05	0.94305	BnaAnng41010D	2.24287	1.94528e-09	1.51139	1.24e-18	1.18071	0.000181545
BnaC07g34250D	GSBRNA2T00031281001	1053	hypoxia-induced	AT4G17260.1	LDH	Lactate/malate dehydrogenase family protein	Chr4:9673897-9675540 FORWARD LENGTH=1453	1453	0	AT4G17260	245324_at	40	0		AT4G17260	0	0	BnaC07g34250D	5.75093	4.00608	0.108621	5.51489	3.96872	0.00554751	3.78134e-46	6.46407e-26	0.968479	2.4548e-43	1.16866e-25	1	BnaC07g34250D	1.57575	1.91412e-18	1.05993	5.14e-25	1.47302	6.44e-45
BnaA03g27980D	GSBRNA2T00112032001	783	HRG	AT3G02550.1	LBD41	LOB domain-containing protein 41	Chr3:536500-538126 REVERSE LENGTH=1515	1515	0	AT3G02550	258487_at	57	0	HRG	AT3G02550	3	0	BnaA03g27980D	7.21451	4.69788	1.59485	6.62953	5.08524	-3.8739	4.7746e-31	2.25922e-16	0.301808	1.35888e-26	8.15556e-18	0.340823	BnaA03g27980D	2.77021	7.87606e-16	2.31578	2.3e-119	2.07778	1.08e-09
BnaC03g33010D	GSBRNA2T00153653001	783	HRG	AT3G02550.1	LBD41	LOB domain-containing protein 41	Chr3:536500-538126 REVERSE LENGTH=1515	1515	0	AT3G02550	258487_at	57	0	HRG	AT3G02550	3	0	BnaC03g33010D	7.06778	4.98346	1.23371	6.32047	4.59286	0.455375	1.96502e-52	2.86257e-31	0.591501	8.82293e-45	1.3834e-27	0.92457	BnaC03g33010D	3.33787	6.04728e-17	3.04881	6.44e-148	2.50172	6.17e-28
BnaA01g32900D	GSBRNA2T00057270001	567	HRG	AT3G02550.1	LBD41	LOB domain-containing protein 41	Chr3:536500-538126 REVERSE LENGTH=1515	1515	6e-117	AT3G02550	258487_at	57	0	HRG	AT3G02550	3	0	BnaA01g32900D	6.96291	5.11554	0.755477	6.41569	4.85698	0.37304	1.5774e-43	1.68382e-27	0.606769	9.13433e-39	1.76529e-25	0.876174	BnaA01g32900D	1.7218	2.32309e-08	1.40516	1e-35	1.38141	0.00190267
BnaAnng22510D	GSBRNA2T00054629001	651	hypoxia-induced	AT5G01750.2		LURP-one-like protein (DUF567)	Chr5:289722-291604 FORWARD LENGTH=1461	1461	1e-125	AT5G01750	251073_at	2	0		AT5G01750	0	0	BnaAnng22510D	6.24176	5.16937	0.646122	5.40056	5.02988	-0.857699	9.98792e-16	1.71628e-11	0.805479	1.02325e-12	3.69925e-11	0.725771	BnaAnng22510D	1.12219	7.40726e-09	1.50957	5.03e-45	3.13035	0
BnaC03g58590D	GSBRNA2T00059172001	1839	hypoxia-induced	AT1G28380.1	NSL1	MAC/Perforin domain-containing protein	Chr1:9963448-9966320 FORWARD LENGTH=2347	2347	0	AT1G28380	261445_at	10	0		AT1G28380	2	0	BnaC03g58590D	2.89362	1.81298	-0.269445	2.8218	2.24433	-0.13071	2.76226e-09	0.000498206	0.866145	9.91017e-09	8.76631e-06	0.982662	BnaC03g58590D	1.99151	6.03509e-06	1.51904	7.49e-19	2.97587	1.83e-29
BnaAnng27980D	GSBRNA2T00076581001	450	hypoxia-induced	AT2G24550.1		major centromere autoantigen B-like protein	Chr2:10427856-10429487 REVERSE LENGTH=1378	1378	7e-90	AT2G24550	263799_at	14	0		AT2G24550	2	0	BnaAnng27980D	2.5538	1.60732	0.4804	1.0487	1.13282	0.361426	7.50507e-13	2.40721e-05	0.529282	0.0049647	0.00352274	0.725771	BnaAnng27980D	2.03398	2.56916e-17	2.68562	3.77e-96	2.85383	1.04e-85
BnaC03g45960D	GSBRNA2T00150082001	603	hypoxia-induced	AT2G15890.1	MEE14	maternal effect embryo arrest 14	Chr2:6920369-6922161 REVERSE LENGTH=1622	1622	6e-168	AT2G15890	265478_at	39	0		AT2G15890	3	0	BnaC03g45960D	6.57561	7.60957	0.523504	5.83872	6.99757	0.604669	1.01196e-19	2.02478e-22	0.741502	1.45357e-16	2.08941e-20	0.725771	BnaC03g45960D	2.30964	2.36792e-20	1.39537	3.74e-38	3.0677	2.63e-232
BnaA07g02870D	GSBRNA2T00026575001	384		AT2G17705.1		methionine-S-oxide reductase	Chr2:7692396-7693253 FORWARD LENGTH=858	858	1e-123	AT2G17705					AT2G17705	0	0	BnaA07g02870D	2.07602	2.63315	0.443214	1.75775	1.88303	-0.096123	6.23238e-06	2.94193e-07	0.790834	0.00018165	0.00016103	1	BnaA07g02870D	1.67181	2.51988e-08	1.3206	3.35e-15	2.70904	3.35e-32
BnaC09g31820D	GSBRNA2T00009708001	1341	hypoxia-induced	AT5G55090.2	MAPKKK15	mitogen-activated protein kinase kinase kinase 15	Chr5:22356852-22358413 REVERSE LENGTH=1562	1562	0	AT5G55090	248090_at	3	0		AT5G55090	0	0	BnaC09g31820D	1.93859	1.79039	-0.500345	2.0973	2.43474	-0.00103764	1.15962e-05	0.00016325	0.655248	3.87467e-06	1.29997e-07	1	BnaC09g31820D	1.76256	5.163e-09	1.9375	1.14e-20	1.88028	2.06e-18
BnaA03g02640D	GSBRNA2T00129716001	789	hypoxia-induced	AT5G08790.1	ATAF2	NAC (No Apical Meristem) domain transcriptional regulator superfamily protein	Chr5:2858849-2860558 REVERSE LENGTH=1530	1530	0	AT5G08790					AT5G08790	1	0	BnaA03g02640D	4.47456	3.20754	0.15654	2.89295	2.74084	0.593605	7.6607e-20	4.09086e-11	0.949328	1.39864e-09	1.96688e-08	0.603959	BnaA03g02640D	3.48058	1.42672e-67	2.33631	1.4e-110	4.00161	6.63e-56
BnaC03g03740D	GSBRNA2T00134569001	726	hypoxia-induced	AT5G08790.1	ATAF2	NAC (No Apical Meristem) domain transcriptional regulator superfamily protein	Chr5:2858849-2860558 REVERSE LENGTH=1530	1530	0	AT5G08790					AT5G08790	1	0	BnaC03g03740D	3.25531	2.32476	0.136616	2.60739	2.6662	0.586459	1.12087e-06	0.00110966	0.992543	0.000110727	0.000126915	0.727452	BnaC03g03740D	2.30753	1.10019e-23	1.13363	5.16e-11	3.99824	1.83e-32
BnaA07g34240D	GSBRNA2T00146429001	954		AT1G78590.1	NADK3	NAD(H) kinase 3	Chr1:29564241-29566812 FORWARD LENGTH=1740	1740	0	AT1G78590					AT1G78590	0	0	BnaA07g34240D	4.7163	2.5123	0.30399	6.11478	3.45769	0.0469128	3.42217e-21	4.23778e-07	0.819768	6.15865e-31	2.19887e-12	1	BnaA07g34240D	2.07802	7.88062e-19	1.16275	1.12e-23	2.30118	1.78e-77
BnaA02g02250D	GSBRNA2T00143309001	1107	hypoxia-induced	AT5G14700.1		NAD(P)-binding Rossmann-fold superfamily protein	Chr5:4740238-4743539 REVERSE LENGTH=1583	1583	0	AT5G14700	250149_at	2	0		AT5G14700	0	0	BnaA02g02250D	4.85093	4.37351	0.0447127	3.49615	3.81821	0.0461781	2.0413e-23	2.50217e-18	1	9.85166e-14	8.99553e-15	1	BnaA02g02250D	1.9684	0.000625681	2.79538	8.42e-25	3.03559	6.5e-21
BnaC02g05680D	GSBRNA2T00151793001	1104	hypoxia-induced	AT5G14700.1		NAD(P)-binding Rossmann-fold superfamily protein	Chr5:4740238-4743539 REVERSE LENGTH=1583	1583	0	AT5G14700	250149_at	2	0		AT5G14700	0	0	BnaC02g05680D	4.01869	2.71341	0.57078	3.34734	3.91299	1.2931	7.93149e-11	2.19019e-05	0.725381	5.52064e-08	1.21091e-09	0.277129	BnaC02g05680D	3.66726	1.8163e-19	2.71699	1.06e-68	3.51786	9.56e-119
BnaC04g10830D	GSBRNA2T00141431001	861	HRG	AT2G34390.1	NIP2;1	NOD26-like intrinsic protein 2;1	Chr2:14514487-14515958 REVERSE LENGTH=1162	1162	0	AT2G34390	267024_s_at	50	0	HRG	AT2G34390			BnaC04g10830D	7.90686	5.76323	-4.2186	7.08796	4.95166	-1.03701	5.25784e-25	4.42613e-15	0.166461	1.81478e-21	2.42934e-12	0.847884	BnaC04g10830D	3.56593	7.82523e-06	3.91996	4.8e-130	5.23984	5.97e-115
BnaA09g45400D	GSBRNA2T00055145001	540		AT1G14860.1	NUDT18	nudix hydrolase homolog 18	Chr1:5124670-5126280 FORWARD LENGTH=1329	1329	0	AT1G14860					AT1G14860	0	0	BnaA09g45400D	2.37947	1.71141	0.220003	3.07602	2.22765	0.0830743	5.01665e-08	0.000224127	0.888462	4.63558e-12	7.33955e-07	1	BnaA09g45400D	1.13024	8.8095e-07	2.21922	3.05e-82	2.7974	2.69e-31
BnaC08g39230D	GSBRNA2T00136600001	540		AT1G14860.1	NUDT18	nudix hydrolase homolog 18	Chr1:5124670-5126280 FORWARD LENGTH=1329	1329	0	AT1G14860					AT1G14860	0	0	BnaC08g39230D	1.48041	1.61287	0.0596092	2.63766	1.97259	-0.0765261	0.00525107	0.00529736	1	9.05524e-07	0.000366508	1	BnaC08g39230D	1.55868	0.000418961	1.55161	3.88e-21	2.61999	2.18e-21
BnaC03g13410D	GSBRNA2T00060755001	519	hypoxia-induced	AT5G56550.1	OXS3	oxidative stress 3	Chr5:22895616-22896734 REVERSE LENGTH=982	982	1e-157	AT5G56550					AT5G56550	1	0	BnaC03g13410D	3.84361	2.35561	0.111679	2.23965	1.98215	0.360804	9.47705e-15	5.84197e-06	0.994414	4.89354e-06	0.000155176	0.839215	BnaC03g13410D	3.77012	5.89518e-20	4.27354	9e-84	4.019	4.66e-60
BnaCnng41650D	GSBRNA2T00038050001	873	HRG	AT1G63090.1	PP2-A11	phloem protein 2-A11	Chr1:23390968-23392873 REVERSE LENGTH=1449	1449	0	AT1G63090	259685_at	36	0	HRG	AT1G63090	3	0	BnaCnng41650D	3.60014	1.97661	0.0443618	2.89456	1.96406	0.072921	7.34852e-15	3.58598e-05	1	2.85328e-10	3.16875e-05	1	BnaCnng41650D	1.02469	6.44314e-06	2.1233	1.28e-50	1.63035	6.25e-23
BnaA07g32860D	GSBRNA2T00146592001	1854	hypoxia-induced	AT1G76550.1		Phosphofructokinase family protein	Chr1:28722657-28727111 REVERSE LENGTH=2279	2279	0	AT1G76550	259969_at	4	1		AT1G76550	0	0	BnaA07g32860D	5.04194	2.81408	0.0384393	4.95884	2.87351	0.0910513	5.71027e-20	1.91899e-07	1	2.55266e-19	7.29531e-08	1	BnaA07g32860D	2.6378	1.07643e-54	1.3876	3.89e-28	3.7075	0
BnaC05g44660D	GSBRNA2T00039006001	1110	hypoxia-induced	AT3G07310.1		phosphoserine aminotransferase, putative (DUF760)	Chr3:2327818-2329926 REVERSE LENGTH=1595	1595	0	AT3G07310	259017_at	16	0		AT3G07310	1	0	BnaC05g44660D	1.96336	1.7757	0.273326	1.60483	1.63578	0.400632	6.16461e-11	1.38191e-08	0.694623	2.18272e-07	2.2421e-07	0.55258	BnaC05g44660D	2.52299	3.47942e-36	1.51715	7.46e-35	2.21271	2.5e-83
BnaC04g35420D	GSBRNA2T00149819001	258	hypoxia-induced	AT2G22860.1	PSK2	phytosulfokine 2 precursor	Chr2:9737583-9738384 FORWARD LENGTH=654	654	2e-56	AT2G22860	266799_at	8	6		AT2G22860	0	0	BnaC04g35420D	3.35686	2.97898	-0.228617	1.56147	2.72075	-0.615667	6.49553e-12	3.63128e-09	0.959005	0.00149439	4.59452e-08	0.725771	BnaC04g35420D	2.81565	1.14777e-07	3.22651	4.77e-30	4.38119	2.64e-38
BnaCnng65920D	GSBRNA2T00093407001	681	hypoxia-induced	AT4G17900.1		PLATZ transcription factor family protein	Chr4:9945778-9948157 FORWARD LENGTH=1412	1412	5e-144	AT4G17900	254694_at	11	0		AT4G17900	3	0	BnaCnng65920D	4.00586	3.09325	-0.0440282	3.83866	3.09236	0.323444	1.25355e-19	8.25271e-12	1	4.05488e-18	4.65142e-12	0.810894	BnaCnng65920D	1.69044	8.91115e-13	2.73736	2.12e-91	4.14955	9.58e-257
BnaC06g19150D	GSBRNA2T00132094001	1377	hypoxia-induced	AT1G80380.2		P-loop containing nucleoside triphosphate hydrolases superfamily protein	Chr1:30217202-30220004 FORWARD LENGTH=1721	1721	0	AT1G80380	260284_at	15	0		AT1G80380	0	0	BnaC06g19150D	2.84969	1.67338	-0.116083	1.10407	1.54446	0.0165936	2.43289e-13	4.4618e-05	0.961776	0.00635321	0.000145831	1	BnaC06g19150D	2.69243	5.35681e-38	3.27238	2.39e-176	2.35577	2.05e-147
BnaC02g24170D	GSBRNA2T00012438001	642	hypoxia-induced	AT1G76600.1		poly polymerase	Chr1:28746833-28747848 FORWARD LENGTH=1016	1016	1e-145	AT1G76600	259979_at	35	0		AT1G76600	3	0	BnaC02g24170D	3.70286	1.61914	0.530649	3.14581	1.70205	0.123645	6.51674e-11	0.00728657	0.732709	2.56706e-08	0.00361973	1	BnaC02g24170D	4.34908	3.09772e-33	5.10889	1.52e-77	5.26758	1.65e-38
BnaA03g04460D	GSBRNA2T00129937001	1443	hypoxia-induced	AT5G13700.1	PAO1	polyamine oxidase 1	Chr5:4420069-4423095 REVERSE LENGTH=1693	1693	0	AT5G13700	250246_at	2	0		AT5G13700	0	0	BnaA03g04460D	4.58505	2.87797	0.656293	4.31369	2.78786	0.558393	4.19084e-19	1.52657e-08	0.583458	4.31392e-17	3.24303e-08	0.695789	BnaA03g04460D	3.60904	6.00339e-37	1.88114	1.79e-37	3.87409	1.63e-62
BnaA06g09200D	GSBRNA2T00092316001	1263	hypoxia-induced	AT1G14370.1	APK2A	protein kinase 2A	Chr1:4915491-4918138 FORWARD LENGTH=1828	1828	0	AT1G14370	261526_at	6	0		AT1G14370	1	0	BnaA06g09200D	2.73856	1.86612	0.292506	2.30776	2.37339	-0.0740751	1.10637e-06	0.00247904	0.898717	4.42779e-05	5.1268e-05	1	BnaA06g09200D	1.38146	0.000427983	2.21469	1.36e-39	4.13576	6.44e-76
BnaC05g15340D	GSBRNA2T00067794001	1149	hypoxia-induced	AT1G19770.1	PUP14	purine permease 14	Chr1:6832325-6833837 FORWARD LENGTH=1418	1418	0	AT1G19770	261143_at	9	0		AT1G19770	2	0	BnaC05g15340D	3.681	1.84884	0.383042	2.47891	2.42589	-0.602423	5.38116e-14	0.000873222	0.765359	2.86615e-07	5.05638e-06	0.614518	BnaC05g15340D	2.22455	7.31518e-05	1.73418	2.35e-20	4.24099	1.49e-29
BnaC03g31730D	GSBRNA2T00153492001	582	hypoxia-induced	AT4G01026.1	PYL7	PYR1-like 7	Chr4:446978-448511 FORWARD LENGTH=1240	1240	0	AT4G01026	255602_at	8	0		AT4G01026	0	0	BnaC03g31730D	3.376	2.71092	-0.00078854	2.20434	2.28037	0.513065	5.95551e-16	2.73827e-10	1	9.19988e-08	8.74679e-08	0.58033	BnaC03g31730D	1.17969	1.23163e-08	1.04357	3.66e-11	1.99849	1.65e-50
BnaC05g50000D	GSBRNA2T00026188001	852	hypoxia-induced	AT1G17710.1	PEPC1	Pyridoxal phosphate phosphatase-related protein	Chr1:6090405-6092027 REVERSE LENGTH=1250	1250	0	AT1G17710	259399_at	13	5		AT1G17710	0	0	BnaC05g50000D	2.91714	2.96492	0.996413	3.31537	2.54706	0.134934	0.000624946	0.00129156	0.707806	0.000202466	0.0054591	1	BnaC05g50000D	5.31293	2.15421e-70	7.31568	6.91e-187	5.78911	4.64e-180
BnaA10g10590D	GSBRNA2T00052858001	1266	hypoxia-induced	AT5G56350.1		Pyruvate kinase family protein	Chr5:22819936-22822904 REVERSE LENGTH=2190	2190	0	AT5G56350	247989_at	3	1		AT5G56350	0	0	BnaA10g10590D	2.90697	2.69435	-0.107508	3.22634	3.22175	0.640867	2.32632e-08	8.75861e-07	0.999947	1.21173e-09	3.13836e-09	0.603278	BnaA10g10590D	1.23813	7.13485e-14	1.71805	2.57e-39	2.19324	9.49e-102
BnaCnng14000D	GSBRNA2T00085820001	1266	hypoxia-induced	AT5G56350.1		Pyruvate kinase family protein	Chr5:22819936-22822904 REVERSE LENGTH=2190	2190	0	AT5G56350	247989_at	3	1		AT5G56350	0	0	BnaCnng14000D	2.56154	2.24705	-0.259821	2.67345	2.6322	0.00837023	2.46102e-07	2.16346e-05	0.877283	1.20932e-07	3.93297e-07	1	BnaCnng14000D	1.30372	4.96976e-16	2.38664	1.53e-123	2.74307	0
BnaC07g26270D	GSBRNA2T00142980001	2769	HRG	AT5G47910.1	RBOHD	respiratory burst oxidase homologue D	Chr5:19397041-19402061 FORWARD LENGTH=3603	3603	0	AT5G47910	248719_at	45	0	HRG	AT5G47910	3	0	BnaC07g26270D	3.57463	2.72402	-0.0326138	3.30589	2.67893	0.270787	7.60722e-16	1.39003e-09	1	8.91258e-14	2.07453e-09	0.85285	BnaC07g26270D	3.06499	8.82887e-57	2.03505	2.62e-93	4.53739	0
BnaA06g30520D	GSBRNA2T00144457001	2769	HRG	AT5G47910.1	RBOHD	respiratory burst oxidase homologue D	Chr5:19397041-19402061 FORWARD LENGTH=3603	3603	0	AT5G47910	248719_at	45	0	HRG	AT5G47910	3	0	BnaA06g30520D	2.99816	2.29517	-0.0461382	2.47223	2.07277	0.134544	7.97389e-18	1.07289e-10	1	1.3278e-12	5.93735e-09	0.949898	BnaA06g30520D	3.071	3.36119e-39	2.03967	1.02e-77	4.67068	2.72e-49
BnaA01g27930D	GSBRNA2T00086359001	2157	hypoxia-induced	AT3G17611.1	RBL14	RHOMBOID-like protein 14	Chr3:6024796-6026556 FORWARD LENGTH=1538	1538	0	AT3G17611	258406_at	4	0		AT3G17611	0	0	BnaA01g27930D	1.86811	1.26967	0.356962	1.93371	1.305	0.565024	2.18432e-12	5.77914e-06	0.578257	6.21109e-13	2.33842e-06	0.302029	BnaA01g27930D	3.46858	1.08425e-72	1.4322	1.51e-33	1.64681	2.16e-29
BnaC09g00760D	GSBRNA2T00018305001	714	hypoxia-induced	AT4G03510.4	RMA1	RING membrane-anchor 1	Chr4:1557593-1559421 REVERSE LENGTH=1353	1353	0	AT4G03510	255381_at	19	0		AT4G03510	0	0	BnaC09g00760D	3.61914	1.98738	0.245339	2.13289	1.34731	0.348496	1.293e-13	9.25798e-05	0.888462	9.32178e-06	0.00845516	0.819688	BnaC09g00760D	2.06026	5.46052e-14	3.13065	1.64e-209	2.97303	3.14e-40
BnaA09g01600D	GSBRNA2T00091300001	696	hypoxia-induced	AT4G03510.4	RMA1	RING membrane-anchor 1	Chr4:1557593-1559421 REVERSE LENGTH=1353	1353	1e-171	AT4G03510	255381_at	19	0		AT4G03510	0	0	BnaA09g01600D	2.53769	2.00346	0.853572	1.62222	2.2108	0.529966	1.2265e-08	3.07173e-05	0.432122	0.000334269	1.6321e-06	0.636629	BnaA09g01600D	2.59002	2.47735e-35	1.87009	2.73e-45	3.934	6.99e-301
BnaC05g10460D	GSBRNA2T00067753001	1059	hypoxia-induced	AT1G14200.1		RING/U-box superfamily protein	Chr1:4854224-4855287 REVERSE LENGTH=1064	1064	3e-79	AT1G14200	262656_at	23	0		AT1G14200	3	0	BnaC05g10460D	4.87875	1.76902	0.567208	4.33007	2.23052	-0.579705	1.5866e-21	0.000534474	0.566972	9.2186e-18	7.44734e-06	0.598673	BnaC05g10460D	5.00805	5.7504e-125	4.28162	0	4.68135	0
BnaC08g31130D	GSBRNA2T00155467001	1113	hypoxia-induced	AT3G61180.1		RING/U-box superfamily protein	Chr3:22645492-22647765 FORWARD LENGTH=1803	1803	0	AT3G61180	251314_at	2	0		AT3G61180	0	0	BnaC08g31130D	3.49037	1.4488	-0.189552	3.57213	2.07189	0.342873	2.60032e-21	0.000164258	0.879589	5.3633e-22	2.10572e-08	0.724992	BnaC08g31130D	1.69054	3.25603e-22	1.07365	3.7e-25	2.16548	3.77e-82
BnaA09g38770D	GSBRNA2T00006757001	1122	hypoxia-induced	AT3G61180.1		RING/U-box superfamily protein	Chr3:22645492-22647765 FORWARD LENGTH=1803	1803	0	AT3G61180	251314_at	2	0		AT3G61180	0	0	BnaA09g38770D	3.18846	1.31918	-0.0880979	2.93012	1.65875	0.304467	4.42766e-35	7.21534e-07	0.951929	3.53096e-30	1.60663e-10	0.627574	BnaA09g38770D	1.29557	5.61797e-15	1.02389	7.02e-21	1.95487	9.97e-82
BnaA01g06660D	GSBRNA2T00039900001	489	hypoxia-induced	AT4G30370.1		RING/U-box superfamily protein	Chr4:14858444-14859503 REVERSE LENGTH=1060	1060	2e-122	AT4G30370					AT4G30370	3	0	BnaA01g06660D	4.8595	3.13421	-0.0739634	4.00415	2.34718	0.185151	1.1875e-33	5.81288e-15	1	1.31933e-25	3.74293e-10	0.9122	BnaA01g06660D	2.11342	2.24456e-21	1.19166	3.59e-26	2.5105	2.58e-49
BnaC03g67950D	GSBRNA2T00116239001	456	hypoxia-induced	AT4G30370.1		RING/U-box superfamily protein	Chr4:14858444-14859503 REVERSE LENGTH=1060	1060	2e-89	AT4G30370					AT4G30370	3	0	BnaC03g67950D	4.5663	2.63543	0.0841009	6.68584	4.90467	0.260002	2.33761e-09	0.00082569	1	1.53269e-15	1.01596e-09	0.983453	BnaC03g67950D	3.45168	3.20803e-35	1.41062	1.41e-36	4.15362	5.85e-58
BnaC07g45800D	GSBRNA2T00100096001	699	hypoxia-induced	AT4G35840.1		RING/U-box superfamily protein	Chr4:16980712-16982550 FORWARD LENGTH=1366	1366	0	AT4G35840	253105_at	2	1		AT4G35840	0	0	BnaC07g45800D	2.04982	2.20851	0.19777	2.2847	2.54353	0.166321	2.11506e-05	3.56221e-05	0.945997	3.7349e-06	8.05591e-07	0.978965	BnaC07g45800D	1.65562	7.22214e-18	1.03841	2.21e-21	2.5949	1.92e-137
BnaC03g12360D	GSBRNA2T00141118001	741	hypoxia-induced	AT5G58787.1		RING/U-box superfamily protein	Chr5:23742363-23744646 FORWARD LENGTH=1421	1421	0	AT5G58787	247792_at	3	0		AT5G58787	0	0	BnaC03g12360D	4.84417	2.88657	1.56682	3.81239	2.59579	0.364955	8.47095e-34	6.46122e-14	0.0545729	9.84693e-23	1.90345e-11	0.81357	BnaC03g12360D	1.73639	2.08649e-14	1.0969	1.86e-12	2.22008	8.89e-39
BnaAnng17320D	GSBRNA2T00030453001	780	hypoxia-induced	AT5G58787.1		RING/U-box superfamily protein	Chr5:23742363-23744646 FORWARD LENGTH=1421	1421	0	AT5G58787	247792_at	3	0		AT5G58787	0	0	BnaAnng17320D	3.39502	1.65143	0.179742	3.1722	1.58377	0.860011	6.03997e-26	5.62972e-07	0.883514	9.15877e-23	1.61222e-06	0.156581	BnaAnng17320D	1.31451	1.77302e-10	1.1096	3.93e-23	1.69594	1.58e-50
BnaA09g10200D	GSBRNA2T00068565001	1101		AT2G20310.1	RIN13	RPM1 interacting protein 13	Chr2:8761180-8763372 REVERSE LENGTH=1730	1730	4e-104	AT2G20310	265307_at	0	0		AT2G20310	0	0	BnaA09g10200D	3.25358	2.75448	-0.807967	3.86013	3.24453	0.737352	1.00823e-06	0.000120774	0.553085	1.53169e-08	3.18992e-06	0.632181	BnaA09g10200D	1.66051	4.78764e-15	2.11908	2.45e-63	3.58264	3.09e-115
BnaC01g03440D	GSBRNA2T00130894001	618		AT4G35070.2		SBP (S-ribonuclease binding protein) family protein	Chr4:16694149-16695698 FORWARD LENGTH=1371	1371	2e-136	AT4G35070	253168_at	0	1		AT4G35070	0	0	BnaC01g03440D	2.1338	2.23186	0.0803129	3.07548	2.40999	0.306606	0.000343373	0.000524168	1	8.19539e-07	8.36601e-05	0.878316	BnaC01g03440D	2.14606	1.57404e-12	1.32703	1.97e-12	1.88585	2.94e-12
BnaA06g02700D	GSBRNA2T00021149001	1263	hypoxia-induced	AT1G50600.3	SCL5	scarecrow-like 5	Chr1:18737132-18739335 REVERSE LENGTH=2020	2020	0	AT1G50600	261860_at	9	0		AT1G50600	0	0	BnaA06g02700D	2.94639	2.18292	0.305012	2.46281	2.07179	0.232112	1.59121e-13	1.21689e-07	0.761092	7.39275e-10	4.39923e-07	0.863201	BnaA06g02700D	2.08548	1.23409e-34	1.64613	1.39e-51	2.91925	0
BnaA03g30430D	GSBRNA2T00111738001	108	HRG	AT3G10040.1		sequence-specific DNA binding transcription factor	Chr3:3096345-3098417 REVERSE LENGTH=2073	2073	1e-21	AT3G10040	258930_at	55	0	HRG	AT3G10040	3	0	BnaA03g30430D	9.8514	6.30121	-0.28955	7.87586	7.2266	2.45673	5.13446e-34	4.08495e-18	0.997254	2.91111e-26	4.54456e-21	0.378809	BnaA03g30430D	5.9712	3.72141e-69	1.86829	1.34e-71	4.17197	1.5e-09
BnaCnng58040D	GSBRNA2T00072010001	108	HRG	AT3G10040.1		sequence-specific DNA binding transcription factor	Chr3:3096345-3098417 REVERSE LENGTH=2073	2073	2e-24	AT3G10040	258930_at	55	0	HRG	AT3G10040	3	0	BnaCnng58040D	9.78285	8.73322	0.447628	8.35397	6.76459	2.44706	1.64698e-28	1.90941e-21	0.973192	1.76142e-23	1.42469e-16	0.634207	BnaCnng58040D	5.80052	4.46471e-48	2.24723	2.81e-74	4.25809	1.55e-10
BnaA03g03220D	GSBRNA2T00129792001	669	hypoxia-induced	AT5G11090.1		serine-rich protein-like protein	Chr5:3524677-3525846 FORWARD LENGTH=1170	1170	3e-135	AT5G11090	245905_at	35	1		AT5G11090	0	0	BnaA03g03220D	3.56716	2.59579	0.0958032	3.19173	2.89299	0.687702	1.09447e-26	5.44988e-15	0.970847	4.80721e-22	3.18161e-18	0.265505	BnaA03g03220D	1.13151	2.32477e-08	1.209	4.26e-30	1.32085	2.51e-43
BnaAnng34290D	GSBRNA2T00004628001	912	HRG	AT5G62520.1	SRO5	similar to RCD one 5	Chr5:25097944-25099907 FORWARD LENGTH=1700	1700	0	AT5G62520	247431_at	55	0	HRG	AT5G62520	3	0	BnaAnng34290D	9.49646	7.32716	0.383614	8.37692	7.78188	-0.470134	4.30148e-24	2.9067e-16	0.885512	3.07038e-20	1.58635e-17	0.884551	BnaAnng34290D	5.55867	3.69833e-92	1.07936	1.47e-24	4.31826	3.09e-12
BnaA06g22030D	GSBRNA2T00109882001	942	HRG	AT5G62520.1	SRO5	similar to RCD one 5	Chr5:25097944-25099907 FORWARD LENGTH=1700	1700	0	AT5G62520	247431_at	55	0	HRG	AT5G62520	3	0	BnaA06g22030D	5.40439	4.25681	-0.966879	5.2774	5.25738	-1.6192	6.19828e-05	0.00306058	0.844775	0.000125139	0.000231135	0.655368	BnaA06g22030D	5.83203	1.28e-120	1.51589	1.05e-16	5.82852	2.35e-109
BnaA05g24250D	GSBRNA2T00104889001	2388		AT3G15354.1	SPA3	SPA1-related 3	Chr3:5169095-5173037 REVERSE LENGTH=3303	3303	0	AT3G15354					AT3G15354	0	0	BnaA05g24250D	6.19199	2.74123	0.319898	4.70518	1.46237	0.189761	2.63322e-74	2.49076e-20	0.620328	1.20582e-48	1.10011e-06	0.839248	BnaA05g24250D	2.26476	5.01872e-19	1.0863	2.7e-16	2.43261	1.99e-19
BnaC03g49410D	GSBRNA2T00079228001	1413	hypoxia-induced	AT5G64870.1		SPFH/Band 7/PHB domain-containing membrane-associated protein family	Chr5:25929432-25931384 REVERSE LENGTH=1860	1860	0	AT5G64870	247208_at	22	0		AT5G64870	2	0	BnaC03g49410D	2.11611	1.05532	-1.3137	2.3432	1.75484	-0.516951	4.6931e-09	0.0087744	0.00784234	1.50984e-10	3.13147e-06	0.524461	BnaC03g49410D	2.9341	8.36086e-27	3.99407	2.92e-226	4.79331	5.91e-183
BnaC03g10290D	GSBRNA2T00140859001	2421	hypoxia-induced	AT5G20830.2	SUS1	sucrose synthase 1	Chr5:7050226-7055398 REVERSE LENGTH=3082	3082	0	AT5G20830	245998_at	52	0		AT5G20830	3	0	BnaC03g10290D	5.80653	3.20814	-0.191319	6.14165	4.1752	0.333737	1.7774e-24	2.21596e-09	0.938821	1.96195e-26	1.71486e-14	0.837702	BnaC03g10290D	3.00364	1.90159e-31	3.45173	9.3e-287	3.95555	0
BnaA03g08110D	GSBRNA2T00148916001	2232	hypoxia-induced	AT5G20830.2	SUS1	sucrose synthase 1	Chr5:7050226-7055398 REVERSE LENGTH=3082	3082	0	AT5G20830	245998_at	52	0		AT5G20830	3	0	BnaA03g08110D	5.46589	4.39061	-0.562999	6.04387	3.65703	-1.06406	2.21392e-13	3.43793e-09	0.723314	3.33674e-15	6.28632e-07	0.432008	BnaA03g08110D	3.08901	6.52785e-22	3.5721	0	4.08822	8.9e-78
BnaA10g14710D	GSBRNA2T00154198001	2418	hypoxia-induced	AT5G20830.2	SUS1	sucrose synthase 1	Chr5:7050226-7055398 REVERSE LENGTH=3082	3082	0	AT5G20830	245998_at	52	0		AT5G20830	3	0	BnaA10g14710D	4.55129	2.93808	-0.0967255	4.29561	3.32341	0.895664	4.81719e-37	1.55353e-17	0.969164	1.2667e-33	9.04828e-22	0.114807	BnaA10g14710D	2.67002	9.15818e-31	1.32015	1.89e-06	4.32644	0
BnaC09g37040D	GSBRNA2T00094365001	2418	hypoxia-induced	AT5G20830.2	SUS1	sucrose synthase 1	Chr5:7050226-7055398 REVERSE LENGTH=3082	3082	0	AT5G20830	245998_at	52	0		AT5G20830	3	0	BnaC09g37040D	3.43646	1.93457	-0.349805	3.64739	2.71457	0.592018	1.74116e-17	2.62233e-06	0.705209	4.07289e-19	2.17497e-11	0.471834	BnaC09g37040D	1.25969	1.40463e-13	1.22365	5.91e-20	2.60799	0
BnaC01g20890D	GSBRNA2T00006211001	900	hypoxia-induced	AT4G32480.1		sugar phosphate exchanger, putative (DUF506)	Chr4:15676240-15677977 FORWARD LENGTH=1313	1313	0	AT4G32480					AT4G32480	3	0	BnaC01g20890D	4.99077	3.84524	0.900979	4.56455	4.01988	-0.0836053	1.14303e-15	2.91209e-09	0.638434	2.81559e-13	5.59411e-10	1	BnaC01g20890D	6.65555	9.9571e-43	4.09564	3.28e-215	7.26454	0
BnaC09g33600D	GSBRNA2T00077445001	558	HRG	AT5G58070.1	TIL	temperature-induced lipocalin	Chr5:23500061-23501416 REVERSE LENGTH=1272	1272	0	AT5G58070	247851_at	42	0	HRG	AT5G58070	3	0	BnaC09g33600D	3.74447	1.68167	0.627745	4.19473	3.50855	0.282115	2.65478e-10	0.00822907	0.611374	5.0308e-12	9.81074e-09	0.896029	BnaC09g33600D	1.09411	1.31323e-10	1.74524	2.42e-43	1.78771	6.39e-48
BnaA08g08500D	GSBRNA2T00126985001	792	hypoxia-induced	AT4G17940.1		Tetratricopeptide repeat (TPR)-like superfamily protein	Chr4:9965742-9967013 FORWARD LENGTH=1105	1105	0	AT4G17940	254702_at	8	1		AT4G17940	0	0	BnaA08g08500D	5.15025	2.38118	0.76752	4.22142	2.74067	0.501753	1.85867e-51	2.42731e-13	0.165986	1.27595e-37	2.06122e-17	0.494371	BnaA08g08500D	1.63778	2.49453e-12	1.94481	2.58e-60	3.39964	3.47e-283
BnaCnng03960D	GSBRNA2T00032432001	1827	HRG	AT4G33070.1	PDC1	Thiamine pyrophosphate dependent pyruvate decarboxylase family protein	Chr4:15952257-15954803 REVERSE LENGTH=2213	2213	0	AT4G33070	253416_at	56	0	HRG	AT4G33070	3	0	BnaCnng03960D	8.69027	7.53314	0.116217	9.49629	7.79527	-0.215884	3.27258e-34	1.92839e-27	1	3.30447e-38	4.69954e-29	0.95732	BnaCnng03960D	3.7043	2.18645e-26	1.54116	2.81e-37	5.25773	1.89e-211
BnaC07g29960D	GSBRNA2T00133531001	1674	hypoxia-induced	AT5G24470.1	PRR5	two-component response regulator-like protein	Chr5:8356204-8358546 REVERSE LENGTH=1677	1677	0	AT5G24470	249741_at	15	1		AT5G24470	2	0	BnaC07g29960D	2.76004	2.68556	2.25019	2.24406	2.88398	3.89049	3.28718e-08	6.96546e-07	0.378013	9.15489e-06	4.6805e-08	0.275387	BnaC07g29960D	4.96921	4.73005e-69	2.0599	1.8e-57	4.57113	0
BnaA06g26980D	GSBRNA2T00147540001	2091	hypoxia-induced	AT5G24470.1	PRR5	two-component response regulator-like protein	Chr5:8356204-8358546 REVERSE LENGTH=1677	1677	0	AT5G24470	249741_at	15	1		AT5G24470	2	0	BnaA06g26980D	2.60496	2.18417	-0.91389	1.87766	2.79528	1.37559	5.90932e-09	5.9235e-06	0.724024	3.56972e-05	3.16211e-09	0.397047	BnaA06g26980D	6.03435	7.2959e-122	2.8971	1.23e-95	5.54934	0
BnaC07g42640D	GSBRNA2T00099706001	1293	hypoxia-induced	AT4G30440.1	GAE1	UDP-D-glucuronate 4-epimerase 1	Chr4:14881689-14883583 REVERSE LENGTH=1895	1895	0	AT4G30440	253631_at	17	3		AT4G30440	2	0	BnaC07g42640D	2.22399	1.46153	0.218494	2.10022	1.1923	-0.0463944	5.96094e-16	3.93585e-07	0.759884	3.59034e-14	4.16494e-05	1	BnaC07g42640D	2.63351	9.73764e-48	1.0299	1.66e-19	2.76476	7.42e-37
BnaAnng21550D	GSBRNA2T00052127001	1173		AT5G59790.1		UPSTREAM OF FLC protein (DUF966)	Chr5:24090645-24093168 FORWARD LENGTH=1941	1941	0	AT5G59790					AT5G59790	0	0	BnaAnng21550D	4.52336	2.83936	-0.247737	4.45442	2.88345	-0.0523533	1.30321e-15	6.82687e-07	0.911113	5.19219e-15	3.7616e-07	1	BnaAnng21550D	1.99291	5.93797e-08	1.09438	0.00988579	1.15734	3.67e-05
BnaA08g00260D	GSBRNA2T00074672001	1416	HRG	AT1G55810.6	UKL3	uridine kinase-like 3	Chr1:20860638-20864266 FORWARD LENGTH=2299	2299	0	AT1G55810	264561_at	34	0	HRG	AT1G55810	3	0	BnaA08g00260D	6.46141	1.96068	-0.692048	5.4871	2.49344	-0.190051	1.6043e-28	0.00036326	0.540376	3.1351e-22	5.11069e-06	0.956364	BnaA08g00260D	1.02002	7.26192e-05	1.13968	2.07e-08	1.19812	4.15e-13
BnaA09g36180D	GSBRNA2T00037052001	687	hypoxia-induced	AT3G56880.1		VQ motif-containing protein	Chr3:21059785-21061247 FORWARD LENGTH=1463	1463	3e-154	AT3G56880	246289_at	12	0		AT3G56880	3	0	BnaA09g36180D	4.85426	3.47533	0.33644	4.87999	3.73544	0.805003	1.15699e-22	8.40715e-13	0.808356	1.29997e-22	1.74732e-14	0.438666	BnaA09g36180D	1.0785	2.36392e-08	1.44124	2e-43	2.60021	6.35e-131
BnaA01g05060D	GSBRNA2T00121042001	852	hypoxia-induced	AT4G31800.2	WRKY18	WRKY DNA-binding protein 18	Chr4:15383633-15385045 FORWARD LENGTH=1217	1217	1e-160	AT4G31800	253485_at	21	0		AT4G31800	2	0	BnaA01g05060D	3.95808	2.98551	1.2011	3.68081	4.88695	0.514743	9.51489e-08	0.000109023	0.331902	8.52426e-07	1.41609e-09	0.805226	BnaA01g05060D	3.33636	5.2402e-24	3.93416	1.38e-164	5.90509	5.58e-89
BnaA04g26970D	GSBRNA2T00003355001	975	hypoxia-induced	AT2G47260.1	WRKY23	WRKY DNA-binding protein 23	Chr2:19404802-19407098 REVERSE LENGTH=1909	1909	0	AT2G47260	260528_at	4	0		AT2G47260	0	0	BnaA04g26970D	3.11115	1.69039	0.0804363	2.45625	1.64683	0.846328	1.04849e-07	0.00759197	1	3.23942e-05	0.00791413	0.625437	BnaA04g26970D	2.78062	3.16691e-25	2.93361	1.23e-50	3.30977	3.36e-26
BnaA07g35260D	GSBRNA2T00146315001	903	hypoxia-induced	AT1G80840.1	WRKY40	WRKY DNA-binding protein 40	Chr1:30383561-30385499 FORWARD LENGTH=1325	1325	0	AT1G80840	261892_at	36	0		AT1G80840	3	0	BnaA07g35260D	2.98035	1.91623	0.0696776	2.96764	2.14996	0.0531937	6.09301e-06	0.00727466	1	1.21886e-05	0.00203565	1	BnaA07g35260D	2.44035	3.68616e-13	2.31903	3.19e-47	3.87581	8.49e-28
BnaC03g22460D	GSBRNA2T00028718001	1665	hypoxia-induced	AT2G40140.2	CZF1	zinc finger (CCCH-type) family protein	Chr2:16772203-16774657 FORWARD LENGTH=2176	2176	0	AT2G40140	263379_at	25	0		AT2G40140	3	0	BnaC03g22460D	3.68799	1.86	0.410955	2.9383	2.16141	1.55626	3.53728e-09	0.00489645	0.88379	2.21556e-06	0.00070861	0.231738	BnaC03g22460D	2.72935	5.20191e-08	1.85278	4.62e-62	4.48094	6.02e-199
BnaA03g18910D	GSBRNA2T00124719001	396	hypoxia-induced	AT2G40140.2	CZF1	zinc finger (CCCH-type) family protein	Chr2:16772203-16774657 FORWARD LENGTH=2176	2176	2e-101	AT2G40140	263379_at	25	0		AT2G40140	3	0	BnaA03g18910D	2.10664	1.66347	-0.492878	1.55615	1.61173	2.41398	0.000135379	0.00654064	0.909182	0.00680996	0.0070236	0.0397982	BnaA03g18910D	2.36557	8.10817e-14	1.43121	3.41e-41	4.10074	1.62e-83
BnaA10g25850D	GSBRNA2T00136367001	687	hypoxia-induced	AT5G04340.1	ZAT6	ZINC FINGER OF ARABIDOPSIS THALIANA 6	Chr5:1216058-1217362 REVERSE LENGTH=1305	1305	0	AT5G04340	245711_at	29	0		AT5G04340	3	0	BnaA10g25850D	5.42965	3.17157	-0.0107429	3.31637	2.76264	-0.288617	9.82468e-14	1.1416e-05	1	1.41349e-06	0.000117795	0.97366	BnaA10g25850D	6.64653	2.86084e-25	3.7319	1.49e-37	7.75255	1.37e-12

## Sheet: TableS7C
Supporting information
Table S7C: Core response of rapeseed to hypoxia (reduced genes)
	Table is a subset of Table S2
	all genes with significant reduction in root samples from this study as well as the studies from Guo et al. 2020 and Li et al. 2021 were chosen
	Column P-Q: data from Lee and Bailey-Serres 2019 were included
ID	ID	QueryLength	Arabidopsis_regulation	HitAcc	symbol	description		HitLength	eValue	AGI	Affy ID	count hypoxia up	count hypoxia down	Hypoxia core	AGI	Lee 2019 count_up	Lee 2019 count_down	ID	logFC Root_H4h_AV	logFC Root_H24h_AV	logFC Leaf_H24h_AV	logFC Root_H4h_ZS	logFC Root_H24h_ZS	logFC Leaf_H24h_ZS	FDR Root_H4h_AV	FDR Root_H24h_AV	FDR Leaf_H24h_AV	FDR Root_H4h_ZS	FDR Root_H24h_ZS	FDR Leaf_H24h_ZS	gene_name	log2.FC 12 h ZS11	pval	log2FC_6 h Santana	padj	log2FC_6h 23651	padj
BnaA03g25870D	GSBRNA2T00151640001	960	hypoxia-responsive	AT4G03070.1	AOP1	2-oxoglutarate (2OG) and Fe(II)-dependent oxygenase superfamily protein	Chr4:1358267-1359698 FORWARD LENGTH=1222	1222	0	AT4G03070	255438_at	0	11		AT4G03070	0	0	BnaA03g25870D	-3.5314	-2.90312	-0.66514	-3.15752	-2.14813	0.0234259	7.67017e-09	4.87915e-06	0.609806	3.27273e-07	0.000677337	1	BnaA03g25870D	-5.91768	1.10128e-37	-3.37378	2.42e-23	-3.2239	0.00168507
BnaA02g18450D	GSBRNA2T00065756001	927	hypoxia-responsive	AT1G77330.1		2-oxoglutarate (2OG) and Fe(II)-dependent oxygenase superfamily protein	Chr1:29062945-29064637 REVERSE LENGTH=1384	1384	0	AT1G77330	246390_at	3	8		AT1G77330	0	0	BnaA02g18450D	-3.23558	-1.90098	-0.578288	-2.24039	-1.58167	0.913026	8.19365e-09	0.00138965	0.836975	7.01298e-05	0.00769935	0.702968	BnaA02g18450D	-2.17412	1.36311e-15	-1.73704	4.43e-37	-2.46868	3.12e-226
BnaA07g14020D	GSBRNA2T00118770001	1422	hypoxia-responsive	AT2G28630.2	KCS12	3-ketoacyl-CoA synthase 12	Chr2:12275256-12277417 REVERSE LENGTH=2162	2162	0	AT2G28630	263443_at	5	7		AT2G28630	1	0	BnaA07g14020D	-2.09123	-2.08896	-0.268355	-2.81732	-2.08629	-0.50283	6.94661e-05	0.000141284	0.793492	6.73697e-06	0.000197346	0.558937	BnaA07g14020D	-1.36869	1.5045e-08	-2.05528	7.87e-31	-2.24253	2.65e-58
BnaC01g09840D	GSBRNA2T00065790001	2085		AT4G28630.1	ABCB23	ABC transporter of the mitochondrion 1	Chr4:14138321-14141054 REVERSE LENGTH=2410	2410	0	AT4G28630					AT4G28630	0	0	BnaC01g09840D	-2.02874	-1.08121	-0.416116	-1.45062	-1.06585	-0.276721	2.67236e-16	2.55289e-05	0.351601	5.21424e-09	2.75619e-05	0.642901	BnaC01g09840D	-1.79579	3.74049e-12	-2.55863	4.42e-07	-2.78081	2.11e-18
BnaC07g23140D	GSBRNA2T00139227001	468		AT3G25930.1		Adenine nucleotide alpha hydrolases-like superfamily protein	Chr3:9492765-9494302 REVERSE LENGTH=1163	1163	4e-131	AT3G25930	258080_at	4	0		AT3G25930	0	0	BnaC07g23140D	-2.97492	-2.09196	1.29819	-2.54958	-1.27433	0.705201	1.05451e-15	3.65644e-08	0.544148	5.1625e-12	0.000957443	0.816448	BnaC07g23140D	-7.29819	3.52004e-71	-3.37264	5.2e-30	-3.5687	0.000136816
BnaC09g21150D	GSBRNA2T00095550001	1476		AT2G03060.2	AGL30	AGAMOUS-like 30	Chr2:901143-903569 FORWARD LENGTH=1336	1336	0	AT2G03060	266793_at	0	0		AT2G03060	0	0	BnaC09g21150D	-2.68191	-2.07259	0.866688	-2.00635	-2.09918	0.251262	2.34586e-08	0.00028485	0.40319	0.000119372	5.67843e-05	0.876174	BnaC09g21150D	-2.22948	2.51218e-17	-1.52962	1.58e-18	-1.49106	2.49e-26
BnaAnng00240D	GSBRNA2T00119555001	1284		AT5G01370.1	ACI1	ALC-interacting protein 1	Chr5:152446-154467 FORWARD LENGTH=1585	1585	0	AT5G01370	251113_at	1	1		AT5G01370	0	0	BnaAnng00240D	-2.14879	-1.00299	0.0503827	-1.90179	-1.96125	-0.222838	1.44001e-10	0.0071445	1	2.42061e-08	2.58293e-08	0.822414	BnaAnng00240D	-4.0709	2.92766e-07	-1.47938	0.0292633	-2.30932	1.55e-06
BnaC09g36910D	GSBRNA2T00094388001	4098		AT5G20960.2	AO1	aldehyde oxidase 1	Chr5:7116687-7122774 FORWARD LENGTH=4477	4477	0	AT5G20960	246133_at	5	0		AT5G20960	1	0	BnaC09g36910D	-1.89055	-1.87851	-0.434991	-1.56984	-1.3979	0.162521	2.09303e-08	8.3354e-08	0.51794	4.96704e-06	8.12114e-05	0.904196	BnaC09g36910D	-2.70829	3.00963e-09	-1.67248	8.65e-43	-1.50553	7.65e-64
BnaC01g08820D	GSBRNA2T00123018001	1350	hypoxia-responsive	AT4G29700.1		Alkaline-phosphatase-like family protein	Chr4:14543138-14545310 REVERSE LENGTH=2173	2173	0	AT4G29700	253697_at	0	27		AT4G29700	0	2	BnaC01g08820D	-3.37903	-1.73502	0.517895	-2.739	-1.86533	0.135677	3.28815e-08	0.00872922	0.703355	9.31472e-06	0.00356177	0.994769	BnaC01g08820D	-5.64023	2.82579e-42	-1.7971	2.72e-05	-4.15576	1.26e-264
BnaC08g23920D	GSBRNA2T00109176001	846	hypoxia-responsive	AT3G52720.4	ACA1	alpha carbonic anhydrase 1	Chr3:19538609-19541284 REVERSE LENGTH=1218	1218	0	AT3G52720	252011_at	6	5		AT3G52720	0	0	BnaC08g23920D	-4.00554	-3.27361	-0.130194	-3.17412	-4.82279	0.512732	2.28039e-08	7.00765e-06	0.995725	9.17169e-06	1.32053e-10	0.777822	BnaC08g23920D	-2.93731	5.06526e-21	-1.85186	7.59e-08	-2.64597	1.94e-13
BnaA09g33130D	GSBRNA2T00129414001	921	hypoxia-responsive	AT3G52720.4	ACA1	alpha carbonic anhydrase 1	Chr3:19538609-19541284 REVERSE LENGTH=1218	1218	0	AT3G52720	252011_at	6	5		AT3G52720	0	0	BnaA09g33130D	-4.97022	-2.79916	-0.35603	-4.06688	-4.1152	0.115665	1.56525e-15	3.30229e-06	0.818773	3.65955e-11	1.80592e-11	1	BnaA09g33130D	-3.70321	3.25734e-30	-2.97081	1.18e-12	-3.26407	4.55e-62
BnaAnng17510D	GSBRNA2T00033665001	1398	hypoxia-responsive	AT1G10740.1		alpha/beta-Hydrolases superfamily protein	Chr1:3568112-3571053 REVERSE LENGTH=2240	2240	0	AT1G10740	262786_at	0	11		AT1G10740	0	1	BnaAnng17510D	-2.0498	-2.68314	-0.291713	-2.77609	-2.48111	-0.0601298	1.04438e-05	6.19724e-08	0.829698	8.7783e-09	1.0265e-06	1	BnaAnng17510D	-1.6709	0.000854813	-2.31332	5.21e-37	-1.67234	2.31e-54
BnaC08g49970D	GSBRNA2T00013640001	1398	hypoxia-responsive	AT1G10740.1		alpha/beta-Hydrolases superfamily protein	Chr1:3568112-3571053 REVERSE LENGTH=2240	2240	0	AT1G10740	262786_at	0	11		AT1G10740	0	1	BnaC08g49970D	-6.61681	-2.66821	-0.153399	-3.98629	-2.41622	-0.175429	2.91965e-19	1.83279e-06	0.954078	7.77542e-12	2.49085e-05	0.946791	BnaC08g49970D	-1.88651	3.73906e-21	-2.14575	2.04e-28	-2.54461	7.26e-75
BnaA03g42310D	GSBRNA2T00151182001	993		AT4G15960.1		alpha/beta-Hydrolases superfamily protein	Chr4:9045610-9047449 REVERSE LENGTH=1531	1531	0	AT4G15960	245527_at	0	0		AT4G15960	0	0	BnaA03g42310D	-2.27647	-3.43422	0.745971	-2.40456	-3.28951	0.69136	1.9764e-08	6.63928e-16	0.248422	7.46084e-09	1.22113e-14	0.352761	BnaA03g42310D	-1.74205	1.75298e-21	-1.05152	1.39e-07	-1.39702	2.27e-27
BnaC04g44160D	GSBRNA2T00011437001	660	hypoxia-responsive	AT2G33790.1	AGP30	arabinogalactan protein 30	Chr2:14293561-14295353 REVERSE LENGTH=1137	1137	7e-136	AT2G33790	267457_at	3	13		AT2G33790	0	0	BnaC04g44160D	-4.37277	-5.47546	0.0023577	-3.24527	-3.98636	-0.0384712	7.39052e-11	6.72523e-14	1	9.06643e-07	1.97794e-08	1	BnaC04g44160D	-2.24953	2.23351e-07	-1.15434	0.0235196	-2.19612	2.05e-22
BnaA09g52770D	GSBRNA2T00014139001	552	hypoxia-responsive	AT2G14890.1	AGP9	arabinogalactan protein 9	Chr2:6399405-6401149 FORWARD LENGTH=1244	1244	8e-147	AT2G14890	266588_at	1	5		AT2G14890	0	1	BnaA09g52770D	-3.76409	-1.93127	0.0586526	-3.4602	-2.11714	-0.910844	2.14137e-10	0.00173104	1	5.74379e-09	0.000444981	0.451583	BnaA09g52770D	-1.34751	5.11536e-07	-1.3526	2.76e-11	-1.42853	1.5e-19
BnaUnng03440D	GSBRNA2T00092830001	471	hypoxia-responsive	AT4G16980.1		arabinogalactan-protein family	Chr4:9556783-9557939 FORWARD LENGTH=1157	1157	3e-113	AT4G16980	245318_at	3	6		AT4G16980	0	0	BnaUnng03440D	-2.65929	-2.07134	0.112268	-1.73549	-2.10392	-0.221946	3.56808e-12	1.28132e-07	0.961834	7.25915e-06	7.43929e-08	0.858352	BnaUnng03440D	-1.61957	4.00144e-18	-1.26854	8.26e-13	-1.70389	1.83e-55
BnaC07g13370D	GSBRNA2T00061813001	1794	hypoxia-responsive	AT1G23030.1		ARM repeat superfamily protein	Chr1:8156504-8159185 FORWARD LENGTH=2423	2423	0	AT1G23030	264770_at	0	23		AT1G23030	0	3	BnaC07g13370D	-1.68792	-1.37576	-0.269658	-1.74158	-1.50212	-0.462555	1.83503e-06	0.000260833	0.760635	1.43311e-06	5.4223e-05	0.553468	BnaC07g13370D	-1.10747	9.78338e-07	-1.23718	1.4e-18	-1.1713	1.54e-18
BnaC05g18430D	GSBRNA2T00119415001	1830	hypoxia-responsive	AT1G23030.1		ARM repeat superfamily protein	Chr1:8156504-8159185 FORWARD LENGTH=2423	2423	0	AT1G23030	264770_at	0	23		AT1G23030	0	3	BnaC05g18430D	-2.97053	-1.75098	-0.458648	-2.57598	-1.35666	-0.398871	2.68609e-11	0.000161887	0.637441	1.0354e-08	0.00382367	0.725771	BnaC05g18430D	-1.59643	4.82934e-09	-1.33465	7.21e-18	-1.41449	2.41e-19
BnaA09g10660D	GSBRNA2T00068628001	1218	hypoxia-responsive	AT1G62800.2	ASP4	aspartate aminotransferase 4	Chr1:23253703-23257546 REVERSE LENGTH=1579	1579	0	AT1G62800	262646_at	0	5		AT1G62800	0	0	BnaA09g10660D	-1.71806	-1.97742	-0.420451	-1.25454	-1.50054	0.218674	0.000148389	3.85729e-05	0.678341	0.00802615	0.00193593	0.902771	BnaA09g10660D	-1.55609	4.97869e-17	-1.50378	1.8e-21	-1.39752	6.39e-47
BnaC05g02370D	GSBRNA2T00002743001	675		AT1G04250.1	AXR3	AUX/IAA transcriptional regulator family protein	Chr1:1136078-1138663 FORWARD LENGTH=1317	1317	0	AT1G04250	263664_at	1	1		AT1G04250	0	0	BnaC05g02370D	-1.39815	-1.62884	-0.223633	-1.13471	-1.6009	0.322762	3.24277e-05	2.92538e-06	0.798532	0.00113183	3.62043e-06	0.698257	BnaC05g02370D	-1.32776	0.00342418	-1.58816	1.08e-12	-1.83404	1.39e-34
BnaA03g44890D	GSBRNA2T00106769001	1518		AT4G21760.2	BGLU47	beta-glucosidase 47	Chr4:11561123-11563871 FORWARD LENGTH=1744	1744	0	AT4G21760	254371_at	0	1		AT4G21760	0	0	BnaA03g44890D	-3.68763	-4.55575	-2.07063	-2.61995	-3.02029	0.0888011	2.81055e-06	2.86013e-06	0.348128	0.000509174	0.000312703	1	BnaA03g44890D	-1.48632	5.33901e-10	-1.07474	9.43e-08	-2.20446	2.65e-26
BnaA07g25350D	GSBRNA2T00124454001	1605		AT1G65590.1	HEXO3	beta-hexosaminidase 3	Chr1:24385552-24391208 FORWARD LENGTH=2271	2271	0	AT1G65590	264684_at	0	1		AT1G65590	0	0	BnaA07g25350D	-2.53613	-1.95599	0.622214	-2.2683	-1.87072	0.22195	5.24846e-09	1.69078e-05	0.43254	3.32053e-07	4.43994e-05	0.886836	BnaA07g25350D	-1.97644	1.51134e-12	-1.9117	8.1e-20	-1.26885	7.06e-43
BnaA03g38500D	GSBRNA2T00155047001	525	hypoxia-responsive	AT2G13820.3	XYP2	Bifunctional inhibitor/lipid-transfer protein/seed storage 2S albumin superfamily protein	Chr2:5774115-5776342 REVERSE LENGTH=753	753	2e-160	AT2G13820	265656_at	2	5		AT2G13820	0	0	BnaA03g38500D	-2.90726	-1.40524	-0.52325	-2.27249	-1.4756	-0.134081	3.57924e-17	7.87117e-05	0.484629	3.49393e-11	2.8909e-05	0.962178	BnaA03g38500D	-2.30048	2.77868e-10	-1.6149	3.43e-09	-2.33236	2.33e-26
BnaCnng05430D	GSBRNA2T00038879001	1170	hypoxia-responsive	AT2G33560.1	BUBR1	BUB1-related (BUB1: budding uninhibited by benzymidazol 1)	Chr2:14213601-14216054 REVERSE LENGTH=1533	1533	0	AT2G33560	255790_at	0	2		AT2G33560	0	0	BnaCnng05430D	-2.69108	-1.54006	0.170947	-2.32604	-1.94473	-0.494843	1.8934e-11	0.000306648	0.922753	1.0391e-08	3.59972e-06	0.635384	BnaCnng05430D	-4.04853	9.0898e-23	-1.27474	0.0175846	-2.8752	5.96e-09
BnaC04g36180D	GSBRNA2T00149949001	987		AT2G23790.1		calcium uniporter (DUF607)	Chr2:10125367-10127589 REVERSE LENGTH=1470	1470	0	AT2G23790					AT2G23790	0	0	BnaC04g36180D	-1.68687	-1.60101	0.301572	-2.04118	-1.71926	-0.0307309	1.41116e-09	4.81292e-08	0.650168	8.9303e-13	6.45879e-09	1	BnaC04g36180D	-1.9055	1.13814e-05	-1.21979	2.69e-08	-1.34016	1.14e-11
BnaA09g10870D	GSBRNA2T00092553001	444		AT1G63220.1		Calcium-dependent lipid-binding (CaLB domain) family protein	Chr1:23448812-23450530 FORWARD LENGTH=935	935	6e-154	AT1G63220	260083_at	2	0		AT1G63220	0	0	BnaA09g10870D	-2.73624	-2.3803	0.0883714	-1.92295	-1.79924	0.983294	8.62973e-08	9.48695e-06	1	0.000320658	0.00130897	0.8182	BnaA09g10870D	-1.3832	0.00161675	-1.26681	0.0281774	-1.36486	8.64e-06
BnaC08g40090D	GSBRNA2T00090535001	540	hypoxia-responsive	AT1G13830.1		Carbohydrate-binding X8 domain superfamily protein	Chr1:4739734-4741189 REVERSE LENGTH=1122	1122	7e-148	AT1G13830	259424_at	0	3		AT1G13830	0	0	BnaC08g40090D	-3.69509	-2.31849	-2.31449	-2.98292	-3.61448	0.0197381	1.32378e-06	0.00390637	0.638434	0.00132626	5.73721e-05	1	BnaC08g40090D	-3.57019	6.71595e-09	-2.84009	0.00116498	-2.3926	1.18e-05
BnaA03g25100D	GSBRNA2T00151540001	1758	hypoxia-responsive	AT4G12420.1	SKU5	Cupredoxin superfamily protein	Chr4:7349662-7353117 REVERSE LENGTH=2292	2292	0	AT4G12420	254815_at	1	11		AT4G12420	0	1	BnaA03g25100D	-1.7449	-1.40973	0.218318	-1.5183	-1.13132	-0.741828	2.10045e-08	1.97574e-05	0.800336	1.80315e-06	0.000677865	0.155401	BnaA03g25100D	-1.51072	4.07731e-17	-1.55121	1.71e-31	-1.90519	1.58e-102
BnaCnng05250D	GSBRNA2T00038850001	1695		AT4G01740.1		Cysteine/Histidine-rich C1 domain family protein	Chr4:753422-755456 FORWARD LENGTH=1959	1959	2e-20	AT4G01740	255563_at	0	0		AT4G01740	0	0	BnaCnng05250D	-1.64304	-2.05874	1.02656	-1.20949	-1.87872	0.295942	6.51662e-05	2.75176e-06	0.0297457	0.00340958	1.69933e-05	0.745039	BnaCnng05250D	-2.80702	4.84893e-08	-1.34058	0.0210248	-3.70305	1.22e-10
BnaCnng45890D	GSBRNA2T00045329001	1491	hypoxia-responsive	AT3G26330.1	CYP71B37	cytochrome P450, family 71, subfamily B, polypeptide 37	Chr3:9646784-9648658 REVERSE LENGTH=1714	1714	0	AT3G26330	256875_at	2	11		AT3G26330	0	0	BnaCnng45890D	-2.06596	-1.28504	1.68847	-1.29892	-1.49142	-0.447364	2.88238e-06	0.00903827	0.597507	0.00479631	0.0016626	0.984415	BnaCnng45890D	-7.49093	7.39827e-41	-3.35296	3.02e-05	-3.89012	5.3e-15
BnaA01g34610D	GSBRNA2T00039720001	1623	hypoxia-responsive	AT4G39950.1	CYP79B2	cytochrome P450, family 79, subfamily B, polypeptide 2	Chr4:18525246-18527579 FORWARD LENGTH=1986	1986	0	AT4G39950	252827_at	1	23		AT4G39950	0	1	BnaA01g34610D	-5.10418	-3.06159	-0.315204	-3.62743	-4.2652	1.18061	8.49331e-08	0.00167999	0.934564	8.66637e-05	1.17033e-05	0.513675	BnaA01g34610D	-1.38345	9.39308e-10	-2.04493	5.89e-16	-2.17409	8.67e-116
BnaC08g17520D	GSBRNA2T00139667001	1869	hypoxia-responsive	AT1G17745.1	PGDH	D-3-phosphoglycerate dehydrogenase	Chr1:6100964-6105347 FORWARD LENGTH=2436	2436	0	AT1G17745	259403_at	1	4		AT1G17745	0	0	BnaC08g17520D	-2.11954	-1.57685	0.749532	-1.88636	-2.12426	0.578877	1.93716e-07	0.000283245	0.268491	4.7841e-06	4.47742e-07	0.498671	BnaC08g17520D	-1.09011	1.16452e-07	-1.15892	1.69e-09	-1.47545	1.38e-47
BnaAnng18850D	GSBRNA2T00039203001	570	hypoxia-responsive	AT1G55210.2		Disease resistance-responsive (dirigent-like protein) family protein	Chr1:20597790-20598675 REVERSE LENGTH=814	814	0	AT1G55210	259655_at	1	4		AT1G55210	0	0	BnaAnng18850D	-2.26889	-1.80473	0.456855	-1.69099	-1.65238	-0.485899	1.71364e-06	0.000294719	0.658925	0.000437297	0.000604082	0.708974	BnaAnng18850D	-2.25674	6.2722e-15	-1.78607	6.49e-05	-2.44876	5.71e-13
BnaC03g70320D	GSBRNA2T00032555001	570	hypoxia-responsive	AT1G55210.2		Disease resistance-responsive (dirigent-like protein) family protein	Chr1:20597790-20598675 REVERSE LENGTH=814	814	0	AT1G55210	259655_at	1	4		AT1G55210	0	0	BnaC03g70320D	-2.36987	-1.37547	0.0891268	-1.38203	-1.80167	-0.13618	9.93664e-09	0.00166793	0.990419	0.000986848	1.67823e-05	0.962536	BnaC03g70320D	-2.26293	4.31357e-21	-1.976	2.3e-12	-2.44339	1.45e-18
BnaA02g22810D	GSBRNA2T00084872001	1050	hypoxia-responsive	AT5G44680.1		DNA glycosylase superfamily protein	Chr5:18023985-18026077 REVERSE LENGTH=1722	1722	0	AT5G44680	249008_at	1	19		AT5G44680	0	1	BnaA02g22810D	-1.77624	-1.56706	0.213542	-2.30224	-1.96871	-0.196499	7.47449e-08	1.37884e-05	0.784563	1.00334e-11	3.06613e-08	0.834178	BnaA02g22810D	-1.0271	0.0018695	-1.7801	4.56e-11	-1.1137	1.31e-08
BnaA05g29710D	GSBRNA2T00059537001	1098	hypoxia-responsive	AT3G08030.1		DNA-directed RNA polymerase subunit beta (Protein of unknown function, DUF642)	Chr3:2563803-2566042 FORWARD LENGTH=1709	1709	0	AT3G08030	258641_at	1	7		AT3G08030	0	1	BnaA05g29710D	-3.41826	-1.96064	0.58391	-3.06393	-2.2958	-0.0182481	1.05047e-11	0.00016115	0.557345	1.70674e-07	8.80476e-05	1	BnaA05g29710D	-1.02544	6.36258e-05	-1.13312	4.84e-20	-1.615	4.56e-96
BnaA01g07550D	GSBRNA2T00091371001	1275		AT4G29310.1		DUF1005 family protein (DUF1005)	Chr4:14437133-14439723 REVERSE LENGTH=2148	2148	0	AT4G29310					AT4G29310	1	0	BnaA01g07550D	-2.14321	-1.98029	0.149612	-1.69712	-2.07771	-1.20975	1.81248e-05	0.000128963	0.961528	0.00101976	6.39459e-05	0.116803	BnaA01g07550D	-1.98747	1.28579e-07	-1.76439	1.78e-09	-2.36493	4.04e-18
BnaC01g09220D	GSBRNA2T00123069001	1278		AT4G29310.1		DUF1005 family protein (DUF1005)	Chr4:14437133-14439723 REVERSE LENGTH=2148	2148	0	AT4G29310					AT4G29310	1	0	BnaC01g09220D	-2.52557	-1.94105	-0.00220064	-1.76579	-2.41329	-1.3593	7.80581e-08	6.87032e-05	1	0.000220153	5.50112e-07	0.0536784	BnaC01g09220D	-3.06199	0.00109747	-2.70951	4.66e-07	-4.63035	1.09e-20
BnaC09g30230D	GSBRNA2T00010111001	954	hypoxia-responsive	AT5G53870.2	ENODL1	early nodulin-like protein 1	Chr5:21869863-21871284 REVERSE LENGTH=1315	1315	8e-112	AT5G53870	248236_at	1	4		AT5G53870	0	0	BnaC09g30230D	-3.16439	-3.35016	-1.72033	-2.82567	-4.48471	0.47212	7.07876e-06	6.45693e-06	0.0856751	8.39716e-05	3.40023e-09	0.822517	BnaC09g30230D	-1.65881	8.59805e-05	-2.62107	2.94e-05	-1.67381	1.1e-07
BnaC08g33620D	GSBRNA2T00127271001	537	hypoxia-responsive	AT2G25060.1	ENODL14	early nodulin-like protein 14	Chr2:10662190-10663103 FORWARD LENGTH=840	840	0	AT2G25060	264377_at	0	7		AT2G25060	0	0	BnaC08g33620D	-3.73319	-1.6237	-0.00915681	-3.04523	-2.37317	-1.20574	6.97648e-11	0.00653593	1	9.53622e-08	4.48081e-05	0.257764	BnaC08g33620D	-5.41738	5.69501e-67	-2.9067	1.38e-05	-3.99087	1.51e-32
BnaA09g41080D	GSBRNA2T00057277001	537	hypoxia-responsive	AT2G25060.1	ENODL14	early nodulin-like protein 14	Chr2:10662190-10663103 FORWARD LENGTH=840	840	0	AT2G25060	264377_at	0	7		AT2G25060	0	0	BnaA09g41080D	-3.98537	-1.84044	0.269587	-3.33906	-2.303	-1.14107	6.16461e-11	0.00327848	0.897351	2.98755e-08	0.000179913	0.302066	BnaA09g41080D	-4.91283	4.83276e-37	-2.75409	4.89e-05	-4.58548	5e-45
BnaA09g34280D	GSBRNA2T00129561001	1293	hypoxia-responsive	AT3G54400.1		Eukaryotic aspartyl protease family protein	Chr3:20140025-20142763 REVERSE LENGTH=1708	1708	0	AT3G54400	251899_at	0	24		AT3G54400	0	2	BnaA09g34280D	-2.45963	-1.10811	0.0665906	-1.80746	-1.74617	-0.0701988	5.84404e-14	0.00188254	0.995781	3.70756e-08	2.00509e-07	0.999935	BnaA09g34280D	-2.91484	7.3671e-32	-2.12537	2.05e-34	-1.92259	1.14e-33
BnaA04g04140D	GSBRNA2T00126443001	1290	hypoxia-responsive	AT3G54400.1		Eukaryotic aspartyl protease family protein	Chr3:20140025-20142763 REVERSE LENGTH=1708	1708	0	AT3G54400	251899_at	0	24		AT3G54400	0	2	BnaA04g04140D	-2.8802	-1.07434	-0.023305	-2.7914	-1.73466	-0.421181	2.9538e-16	0.00495057	1	2.78631e-15	1.391e-06	0.59386	BnaA04g04140D	-1.93204	2.99314e-24	-1.89117	4.1e-47	-1.5499	3.29e-67
BnaCnng73250D	GSBRNA2T00016865001	834	hypoxia-responsive	AT3G54400.1		Eukaryotic aspartyl protease family protein	Chr3:20140025-20142763 REVERSE LENGTH=1708	1708	0	AT3G54400	251899_at	0	24		AT3G54400	0	2	BnaCnng73250D	-3.0361	-1.50742	0.420627	-2.20848	-2.23989	0.419325	2.98848e-13	0.000499273	0.638434	7.77897e-08	7.47977e-08	0.673251	BnaCnng73250D	-2.64613	6.47537e-28	-1.96857	1.98e-22	-1.85354	2.63e-21
BnaC04g26330D	GSBRNA2T00071093001	1290	hypoxia-responsive	AT3G54400.1		Eukaryotic aspartyl protease family protein	Chr3:20140025-20142763 REVERSE LENGTH=1708	1708	0	AT3G54400	251899_at	0	24		AT3G54400	0	2	BnaC04g26330D	-3.42216	-2.57129	0.0289488	-3.41709	-2.77926	-0.210815	5.52001e-14	3.18547e-08	1	1.06042e-13	2.00536e-09	0.901062	BnaC04g26330D	-3.06821	4.94736e-48	-1.1771	1.02e-18	-2.35736	3.2e-65
BnaC09g18420D	GSBRNA2T00041896001	1602	hypoxia-responsive	AT5G44410.1		FAD-binding Berberine family protein	Chr5:17891132-17893067 REVERSE LENGTH=1936	1936	0	AT5G44410	249047_at	4	2		AT5G44410	0	0	BnaC09g18420D	-2.4231	-2.32123	-0.408588	-3.23664	-1.25597	0.233394	1.11205e-07	2.18463e-07	0.483033	7.26767e-14	0.00119983	0.8037	BnaC09g18420D	-1.74374	3.97699e-13	-1.51694	3.7e-10	-1.49668	1.3e-18
BnaA09g16950D	GSBRNA2T00070974001	753	hypoxia-responsive	AT5G44130.1	FLA13	FASCICLIN-like arabinogalactan protein 13 precursor	Chr5:17760865-17762089 FORWARD LENGTH=1225	1225	0	AT5G44130	249037_at	4	10		AT5G44130	0	0	BnaA09g16950D	-1.68078	-1.8189	-0.172693	-1.25874	-1.17388	-0.481015	3.91337e-07	1.18886e-07	0.875005	0.000199295	0.000786586	0.504813	BnaA09g16950D	-2.67845	3.51946e-34	-2.30655	5.72e-52	-2.67874	2.05e-99
BnaC05g02150D	GSBRNA2T00002720001	753	hypoxia-responsive	AT1G03870.1	FLA9	FASCICLIN-like arabinoogalactan 9	Chr1:982381-983544 REVERSE LENGTH=1164	1164	0	AT1G03870	265066_at	1	18		AT1G03870	0	3	BnaC05g02150D	-3.27026	-1.78262	0.0920199	-3.29886	-1.40006	-0.427886	5.88175e-19	2.17531e-06	0.977643	3.57924e-18	0.000327301	0.622181	BnaC05g02150D	-2.06961	8.90519e-18	-2.2343	4.87e-90	-2.9694	1.39e-183
BnaA10g02230D	GSBRNA2T00150322001	753	hypoxia-responsive	AT1G03870.1	FLA9	FASCICLIN-like arabinoogalactan 9	Chr1:982381-983544 REVERSE LENGTH=1164	1164	0	AT1G03870	265066_at	1	18		AT1G03870	0	3	BnaA10g02230D	-3.33749	-1.57599	0.225345	-3.83473	-1.51785	-0.378928	1.29223e-13	0.000874507	0.879073	1.1977e-16	0.00124169	0.740471	BnaA10g02230D	-2.67935	1.23426e-34	-3.01717	1.36e-95	-3.43485	5.3e-225
BnaA08g30070D	GSBRNA2T00053589001	2079	hypoxia-responsive	AT5G35700.1	FIM5	fimbrin-like protein 2	Chr5:13872479-13876876 REVERSE LENGTH=2643	2643	0	AT5G35700	249720_at	0	4		AT5G35700	0	0	BnaA08g30070D	-3.30257	-4.27829	-0.239964	-2.79756	-3.46243	-0.303535	2.13136e-14	7.56945e-21	0.855031	8.00083e-11	1.13835e-14	0.808634	BnaA08g30070D	-2.55223	0.0013305	-3.66064	4.68e-05	-1.10293	7.58e-13
BnaA08g18340D	GSBRNA2T00150683001	837	hypoxia-responsive	AT1G28400.1		GATA zinc finger protein	Chr1:9972185-9973942 REVERSE LENGTH=1758	1758	1e-146	AT1G28400	261500_at	0	16		AT1G28400	0	0	BnaA08g18340D	-1.43102	-1.04708	0.305744	-1.38086	-1.53545	0.508214	2.41719e-06	0.00154714	0.659076	9.18576e-06	1.27725e-06	0.417447	BnaA08g18340D	-2.64262	4.98836e-13	-2.45714	3.48e-12	-2.71486	4.43e-20
BnaC05g51160D	GSBRNA2T00047949001	957	hypoxia-responsive	AT1G28400.1		GATA zinc finger protein	Chr1:9972185-9973942 REVERSE LENGTH=1758	1758	0	AT1G28400	261500_at	0	16		AT1G28400	0	0	BnaC05g51160D	-2.40775	-1.20041	-0.198947	-2.27216	-1.75231	0.0641463	1.76087e-09	0.00625539	0.885272	1.96875e-08	2.56527e-05	1	BnaC05g51160D	-3.15269	4.41405e-26	-1.61488	2.11e-21	-2.50143	1.82e-74
BnaA09g27270D	GSBRNA2T00056033001	1011	hypoxia-responsive	AT1G28400.1		GATA zinc finger protein	Chr1:9972185-9973942 REVERSE LENGTH=1758	1758	0	AT1G28400	261500_at	0	16		AT1G28400	0	0	BnaA09g27270D	-2.77205	-1.34613	-0.144904	-2.35092	-1.75137	0.0261428	7.87577e-17	0.000128027	0.91186	1.50554e-12	2.58233e-07	1	BnaA09g27270D	-4.01584	9.70027e-60	-2.13603	8.22e-27	-3.23591	1.34e-83
BnaA08g18210D	GSBRNA2T00150703001	1173	hypoxia-responsive	AT1G28670.1	ARAB-1	GDSL-like Lipase/Acylhydrolase superfamily protein	Chr1:10074359-10076457 REVERSE LENGTH=1672	1672	0	AT1G28670	262733_s_at	2	20		AT1G28670	0	3	BnaA08g18210D	-8.82115	-3.96979	-0.230587	-5.69353	-5.63079	0.282505	6.88998e-20	1.1335e-09	0.912639	8.79837e-16	4.96642e-15	0.879696	BnaA08g18210D	-3.84566	1.96579e-57	-3.05092	2.23e-73	-3.35278	6.22e-252
BnaC08g08070D	GSBRNA2T00061633001	1611	hypoxia-responsive	AT5G34940.2	GUS3	glucuronidase 3	Chr5:13235741-13238884 REVERSE LENGTH=1948	1948	0	AT5G34940	255860_at	0	6		AT5G34940	0	0	BnaC08g08070D	-1.84535	-1.42307	-0.31229	-1.4953	-1.36721	-0.136807	2.96371e-08	4.09555e-05	0.676817	1.10329e-05	7.39459e-05	0.934872	BnaC08g08070D	-1.6114	6.16056e-08	-1.54542	3.03e-13	-2.32821	2.44e-42
BnaC06g07780D	GSBRNA2T00085525001	891	hypoxia-responsive	AT1G33800.1	GXMT1	glucuronoxylan 4-O-methyltransferase-like protein (DUF579)	Chr1:12261165-12262750 FORWARD LENGTH=1503	1503	0	AT1G33800	261999_at	1	13		AT1G33800	0	1	BnaC06g07780D	-2.56709	-2.61277	0.500378	-1.92554	-2.60577	0.595027	2.8034e-07	6.3334e-07	0.658697	0.000155004	5.96419e-07	0.625437	BnaC06g07780D	-1.73494	3.25331e-06	-2.59812	4.04e-50	-3.56716	3.34e-99
BnaA09g23510D	GSBRNA2T00156477001	891	hypoxia-responsive	AT1G33800.1	GXMT1	glucuronoxylan 4-O-methyltransferase-like protein (DUF579)	Chr1:12261165-12262750 FORWARD LENGTH=1503	1503	0	AT1G33800	261999_at	1	13		AT1G33800	0	1	BnaA09g23510D	-2.8244	-2.54218	0.698768	-2.3402	-2.40069	0.574112	1.60878e-08	1.11237e-06	0.49461	3.60992e-06	3.79778e-06	0.635384	BnaA09g23510D	-2.94634	4.27623e-22	-3.23443	4.75e-47	-3.8181	1.99e-81
BnaC09g13230D	GSBRNA2T00050517001	1965	hypoxia-responsive	AT1G62660.1		Glycosyl hydrolases family 32 protein	Chr1:23199612-23203808 FORWARD LENGTH=2577	2577	0	AT1G62660	265118_at	1	10		AT1G62660	0	0	BnaC09g13230D	-2.23497	-1.72072	-0.140483	-2.86515	-2.13796	0.104298	3.38681e-05	0.00339758	0.975289	2.26658e-07	0.000179156	1	BnaC09g13230D	-1.96864	2.52885e-18	-1.75799	9.78e-35	-2.96119	1.72e-177
BnaC07g15910D	GSBRNA2T00070484001	519	hypoxia-responsive	AT5G67390.1		glycosyltransferase-like protein	Chr5:26887611-26889367 REVERSE LENGTH=1172	1172	6e-161	AT5G67390	246997_at	0	3		AT5G67390	0	0	BnaC07g15910D	-1.21831	-2.04367	0.155325	-1.93451	-2.22751	-0.00951714	0.00288479	1.23563e-06	0.92933	3.37406e-06	1.02175e-07	1	BnaC07g15910D	-4.75317	5.63729e-08	-2.17734	0.000122484	-2.93967	3.59e-08
BnaC02g16680D	GSBRNA2T00076873001	522	hypoxia-responsive	AT5G67390.1		glycosyltransferase-like protein	Chr5:26887611-26889367 REVERSE LENGTH=1172	1172	2e-153	AT5G67390	246997_at	0	3		AT5G67390	0	0	BnaC02g16680D	-1.73824	-1.60174	0.141977	-1.56562	-2.08745	0.109916	3.71645e-07	7.57672e-06	0.923323	1.18869e-05	3.13836e-09	0.967325	BnaC02g16680D	-4.13208	1.02732e-08	-1.92741	9.69e-09	-1.72623	4.85e-10
BnaA09g27240D	GSBRNA2T00056028001	2916	hypoxia-responsive	AT1G28440.1	HSL1	HAESA-like 1	Chr1:9996713-10000455 FORWARD LENGTH=3476	3476	0	AT1G28440	261498_at	1	15		AT1G28440	0	3	BnaA09g27240D	-3.46037	-1.84474	-0.216877	-2.9045	-1.94551	-0.0813693	6.60546e-25	1.97094e-08	0.787884	7.34626e-19	2.34598e-09	0.983436	BnaA09g27240D	-1.92738	2.19257e-13	-1.09494	3.39e-05	-2.15711	7.33e-39
BnaA04g12690D	GSBRNA2T00090182001	1017	hypoxia-responsive	AT2G22190.2	TPPE	Haloacid dehalogenase-like hydrolase (HAD) superfamily protein	Chr2:9433616-9436658 REVERSE LENGTH=1670	1670	0	AT2G22190	263452_at	0	8		AT2G22190	0	0	BnaA04g12690D	-3.86117	-1.75454	0.579998	-2.36767	-2.20321	0.165142	1.85711e-22	1.69423e-05	0.37998	7.19587e-10	7.92917e-08	0.918097	BnaA04g12690D	-4.25735	1.18882e-15	-3.97288	9.17e-13	-2.12442	1.27e-12
BnaC02g41180D	GSBRNA2T00120311001	936	hypoxia-responsive	AT5G24580.4		Heavy metal transport/detoxification superfamily protein	Chr5:8410229-8412512 REVERSE LENGTH=1291	1291	0	AT5G24580	249755_at	0	10		AT5G24580	0	0	BnaC02g41180D	-2.81773	-1.77512	-0.45769	-3.65993	-2.20193	-0.38922	1.26694e-06	0.00284697	0.712042	3.65453e-09	0.000181194	0.809223	BnaC02g41180D	-1.47125	1.18204e-09	-1.04993	1.29e-05	-1.27177	2.61e-18
BnaA01g18650D	GSBRNA2T00021309001	1317	hypoxia-responsive	AT4G15390.2		HXXXD-type acyl-transferase family protein	Chr4:8792800-8794442 REVERSE LENGTH=1568	1568	0	AT4G15390	245555_at	3	3		AT4G15390	0	0	BnaA01g18650D	-3.95772	-2.23926	1.19024	-3.03541	-2.16151	0.450358	4.49791e-10	0.000695593	0.527039	1.20808e-06	0.000794572	0.850866	BnaA01g18650D	-2.4087	4.09625e-10	-1.26165	0.0223209	-3.45643	3.34e-34
BnaCnng77660D	GSBRNA2T00029779001	378	hypoxia-responsive	AT3G02120.1		hydroxyproline-rich glycoprotein family protein	Chr3:377025-377713 FORWARD LENGTH=614	614	3e-61	AT3G02120	258859_at	3	2		AT3G02120	0	0	BnaCnng77660D	-2.90391	-1.57511	-0.0205482	-2.42151	-1.30158	-0.785236	7.86237e-11	0.000641634	1	5.41164e-08	0.00476608	0.403578	BnaCnng77660D	-3.1426	3.68219e-32	-1.8976	0.00800398	-2.15872	1.44e-12
BnaCnng74510D	GSBRNA2T00020324001	576	hypoxia-responsive	AT2G30930.1		hypothetical protein	Chr2:13162074-13163497 FORWARD LENGTH=1220	1220	3e-70	AT2G30930	267209_at	2	6		AT2G30930	0	0	BnaCnng74510D	-2.8854	-3.60652	0.0329921	-2.33698	-2.38032	-2.05437	0.000243286	2.24519e-05	1	0.0036625	0.00463962	0.191939	BnaCnng74510D	-2.28976	9.31567e-07	-1.92614	2.96e-44	-2.54865	6.47e-120
BnaC01g04360D	GSBRNA2T00130772001	198	hypoxia-responsive	AT4G33960.1		hypothetical protein	Chr4:16277282-16277896 FORWARD LENGTH=615	615	2e-53	AT4G33960	253317_at	2	7		AT4G33960	0	0	BnaC01g04360D	-4.24165	-2.6118	0.149503	-1.80305	-2.04505	-0.454475	9.53895e-11	2.13173e-05	0.9599	0.000765823	0.000507642	0.725771	BnaC01g04360D	-3.00375	7.37242e-31	-1.66345	1.5e-05	-3.0529	9.39e-30
BnaC07g29920D	GSBRNA2T00133535001	213	hypoxia-responsive	AT5G24570.1		hypothetical protein	Chr5:8405681-8406132 REVERSE LENGTH=452	452	6e-61	AT5G24570	249750_at	2	17		AT5G24570	0	2	BnaC07g29920D	-2.06129	-2.05372	0.824258	-3.2318	-1.80517	0.314504	9.89316e-05	2.04616e-05	0.190137	6.67655e-07	0.000388422	0.776779	BnaC07g29920D	-2.25536	6.60219e-33	-1.62976	3.85e-16	-1.89837	4.98e-45
BnaA10g03900D	GSBRNA2T00087964001	492		AT1G05870.4		hypothetical protein (DUF1685)	Chr1:1771457-1773261 REVERSE LENGTH=1284	1284	5e-111	AT1G05870					AT1G05870	0	0	BnaA10g03900D	-1.7521	-1.72658	0.53016	-1.95312	-1.84905	-0.292965	2.46543e-05	6.40967e-05	0.474856	1.51878e-05	2.05562e-05	0.791998	BnaA10g03900D	-1.54302	2.57885e-06	-1.54129	1.69e-07	-2.65213	8.47e-22
BnaC09g21860D	GSBRNA2T00067338001	2382	hypoxia-responsive	AT4G05190.1	ATK5	kinesin 5	Chr4:2675064-2680214 FORWARD LENGTH=3169	3169	0	AT4G05190	255265_at	2	4		AT4G05190	0	0	BnaC09g21860D	-2.67557	-1.89446	0.532067	-2.34218	-1.92916	-0.499376	6.18433e-08	0.000321983	0.627715	3.44295e-06	0.00023194	0.709598	BnaC09g21860D	-2.68524	1.35089e-13	-1.01824	0.00117637	-2.63011	2.66e-45
BnaC09g08380D	GSBRNA2T00135009001	3798	hypoxia-responsive	AT5G65930.2	ZWI	kinesin-like calmodulin-binding protein (ZWICHEL)	Chr5:26369857-26376572 REVERSE LENGTH=4216	4216	0	AT5G65930	247115_at	0	4		AT5G65930	0	0	BnaC09g08380D	-2.60525	-1.86106	0.116559	-2.55393	-1.8568	-0.121697	4.84319e-12	1.7944e-06	0.958624	1.98924e-11	1.67539e-06	0.963521	BnaC09g08380D	-1.19876	0.000545959	-1.15417	1e-07	-1.41455	1.11e-31
BnaC04g41010D	GSBRNA2T00105159001	1713	hypoxia-responsive	AT2G30210.1	LAC3	laccase 3	Chr2:12887446-12889931 REVERSE LENGTH=2106	2106	0	AT2G30210	267307_at	1	8		AT2G30210	0	0	BnaC04g41010D	-1.76703	-1.89686	-3.11253	-1.53449	-2.10057	0.362862	0.000196721	0.000179153	0.438573	0.00175176	2.81304e-05	1	BnaC04g41010D	-7.60065	8.90339e-34	-8.42269	9.32e-11	-9.12559	1.85e-13
BnaA03g44500D	GSBRNA2T00106719001	2535	hypoxia-responsive	AT4G20270.1	BAM3	Leucine-rich receptor-like protein kinase family protein	Chr4:10949573-10953113 FORWARD LENGTH=3417	3417	0	AT4G20270	254515_at	0	30		AT4G20270	0	2	BnaA03g44500D	-1.76621	-1.30194	-0.457674	-1.86615	-1.30636	-0.176336	1.34233e-06	0.000731004	0.533353	2.62877e-07	0.00042	0.897444	BnaA03g44500D	-1.71671	6.83758e-08	-1.86735	1.82e-11	-1.63259	8.61e-10
BnaC06g33240D	GSBRNA2T00103286001	2922	hypoxia-responsive	AT1G72180.1		Leucine-rich receptor-like protein kinase family protein	Chr1:27162820-27167430 FORWARD LENGTH=3593	3593	0	AT1G72180	259848_at	0	18		AT1G72180	0	1	BnaC06g33240D	-1.91338	-1.66831	0.479106	-1.16389	-2.57166	0.0511231	2.83828e-06	0.000127871	0.583047	0.00683317	1.39098e-09	1	BnaC06g33240D	-3.13002	8.36642e-23	-2.33367	9.95e-30	-2.91208	1.89e-19
BnaC05g26270D	GSBRNA2T00013173001	1551	hypoxia-responsive	AT1G49750.1		Leucine-rich repeat (LRR) family protein	Chr1:18410857-18413016 REVERSE LENGTH=2042	2042	0	AT1G49750	261598_at	1	8		AT1G49750	0	0	BnaC05g26270D	-2.09943	-1.14367	-0.0127786	-1.32427	-1.8686	-0.12847	6.64957e-09	0.00346345	1	0.000352507	4.22839e-07	0.951566	BnaC05g26270D	-1.48976	9.66062e-07	-1.02798	0.00129673	-1.7841	1.21e-12
BnaC09g32080D	GSBRNA2T00082436001	1260	hypoxia-responsive	AT5G66330.1		Leucine-rich repeat (LRR) family protein	Chr5:26500402-26501955 REVERSE LENGTH=1554	1554	0	AT5G66330	247087_at	0	5		AT5G66330	0	0	BnaC09g32080D	-3.46976	-2.29507	0.800656	-2.88597	-2.646	0.638844	6.55764e-17	1.42197e-08	0.325563	5.74165e-12	3.76637e-10	0.5387	BnaC09g32080D	-2.36347	2.05692e-10	-2.59991	5.72e-10	-3.09792	3.74e-16
BnaC09g13530D	GSBRNA2T00009190001	2304	hypoxia-responsive	AT1G62440.1	LRX2	leucine-rich repeat/extensin 2	Chr1:23112933-23115293 FORWARD LENGTH=2361	2361	0	AT1G62440	265114_at	0	3		AT1G62440	0	1	BnaC09g13530D	-1.96683	-2.03813	-0.496157	-1.87341	-1.7668	-4.1239	0.00077158	0.00120503	0.876616	0.00195364	0.00488504	0.00880197	BnaC09g13530D	-1.0315	7.55554e-06	-1.46461	6.64e-26	-2.2929	6.68e-86
BnaA05g28330D	GSBRNA2T00000388001	390	hypoxia-responsive	AT3G10525.1	LGO	LOSS OF GIANT CELLS FROM ORGANS	Chr3:3281306-3282131 REVERSE LENGTH=826	826	2e-109	AT3G10525	258919_at	0	7		AT3G10525	0	0	BnaA05g28330D	-3.66488	-2.26061	0.229514	-2.35836	-1.88016	-0.0115391	1.24921e-14	3.32343e-08	0.757949	3.51489e-08	1.96896e-06	1	BnaA05g28330D	-3.3439	9.11673e-43	-2.00656	1.74e-11	-2.39771	5.62e-20
BnaC02g47680D	GSBRNA2T00003541001	234		AT2G02100.1	LCR69	low-molecular-weight cysteine-rich 69	Chr2:528179-529186 FORWARD LENGTH=753	753	7e-80	AT2G02100	266119_at	3	0		AT2G02100	1	0	BnaC02g47680D	-1.93633	-1.10376	0.561875	-1.7504	-1.59179	-0.244721	1.11742e-15	1.99644e-05	0.140145	6.58827e-13	1.68561e-10	0.705158	BnaC02g47680D	-4.26157	1.53462e-25	-1.91419	2.51e-18	-2.39287	2.9e-96
BnaA02g26210D	GSBRNA2T00030867001	234		AT2G02100.1	LCR69	low-molecular-weight cysteine-rich 69	Chr2:528179-529186 FORWARD LENGTH=753	753	6e-81	AT2G02100	266119_at	3	0		AT2G02100	1	0	BnaA02g26210D	-2.00517	-1.07698	1.10118	-2.05258	-1.85582	0.0432511	1.53809e-09	0.00336642	0.025104	1.02726e-09	8.75221e-08	1	BnaA02g26210D	-4.40845	7.70601e-23	-1.98119	1.29e-08	-2.59808	2.71e-64
BnaA09g06190D	GSBRNA2T00094638001	1725	hypoxia-responsive	AT5G62680.1	GTR2	Major facilitator superfamily protein	Chr5:25165137-25168060 REVERSE LENGTH=2382	2382	0	AT5G62680	247440_at	1	8		AT5G62680	0	0	BnaA09g06190D	-3.20597	-1.86129	-0.599998	-2.85915	-2.17792	-0.111745	4.03299e-13	4.54846e-05	0.477743	1.0579e-10	1.20061e-06	0.986243	BnaA09g06190D	-2.68625	8.18124e-11	-1.47185	5.02e-05	-2.76669	2.34e-09
BnaC05g36760D	GSBRNA2T00076064001	444	hypoxia-responsive	AT3G16470.2	JR1	Mannose-binding lectin superfamily protein	Chr3:5595929-5598027 REVERSE LENGTH=1131	1131	5e-79	AT3G16470	259383_at	4	4		AT3G16470	1	0	BnaC05g36760D	-2.50683	-1.51197	1.41105	-1.84283	-1.71414	0.274814	1.17004e-06	0.00738765	0.0476778	0.000469003	0.0016343	0.878956	BnaC05g36760D	-2.43053	3.71748e-11	-1.18442	7.43e-07	-2.20542	8.82e-11
BnaC03g64710D	GSBRNA2T00037405001	1524	hypoxia-responsive	AT4G21910.2		MATE efflux family protein	Chr4:11625309-11631255 REVERSE LENGTH=3965	3965	0	AT4G21910	254389_s_at	2	10		AT4G21910	1	0	BnaC03g64710D	-1.94726	-1.60321	-2.35025	-1.9537	-1.62525	2.54156	2.72645e-07	6.93561e-05	0.638309	3.40784e-07	4.20653e-05	0.625437	BnaC03g64710D	-2.83726	4.20533e-06	-2.37828	0.000438294	-2.07748	1.87e-07
BnaAnng12630D	GSBRNA2T00011283001	1101	hypoxia-responsive	AT3G63210.1		mediator of aba-regulated dormancy protein (DUF581)	Chr3:23353514-23355480 REVERSE LENGTH=1871	1871	4e-180	AT3G63210	251169_at	0	13		AT3G63210	0	1	BnaAnng12630D	-3.1101	-1.75409	0.0555259	-1.95793	-1.94488	0.296559	2.77263e-13	6.82599e-05	1	4.33215e-06	6.88425e-06	0.869918	BnaAnng12630D	-2.5196	6.4304e-18	-1.97301	2.27e-06	-2.71577	8.86e-22
BnaC07g18150D	GSBRNA2T00093142001	828		AT5G44610.3	MAP18	microtubule-associated protein 18	Chr5:17993565-17994584 REVERSE LENGTH=701	701	2e-99	AT5G44610	249009_at	5	0		AT5G44610	0	0	BnaC07g18150D	-3.47142	-3.4073	0.0499943	-2.12337	-2.31378	-3.5259	4.70434e-06	2.80061e-05	1	0.00639756	0.00426912	0.442495	BnaC07g18150D	-8.00895	1.14093e-37	-2.70234	1.1e-53	-4.63135	5.68e-146
BnaC09g42790D	GSBRNA2T00031637001	597	hypoxia-responsive	AT5G14750.1	MYB66	myb domain protein 66	Chr5:4763372-4764823 REVERSE LENGTH=981	981	0	AT5G14750	246585_at	2	2		AT5G14750	0	0	BnaC09g42790D	-1.80822	-1.64984	-2.25029	-3.00635	-2.93748	-0.0266699	1.94384e-06	4.08968e-05	0.638434	4.95576e-13	2.44512e-12	1	BnaC09g42790D	-1.37449	0.000497648	-2.17424	1.13e-09	-1.7852	2.07e-12
BnaA01g30110D	GSBRNA2T00076448001	1314	hypoxia-responsive	AT3G13040.3		myb-like HTH transcriptional regulator family protein	Chr3:4172142-4175248 REVERSE LENGTH=1735	1735	0	AT3G13040	257855_at	1	2		AT3G13040	0	0	BnaA01g30110D	-3.46935	-1.33723	0.658896	-3.11112	-1.44477	0.480793	1.87801e-12	0.00419528	0.331621	1.52426e-12	0.000746038	0.591605	BnaA01g30110D	-1.68066	4.73706e-07	-1.16171	0.00100811	-1.23834	7.15e-08
BnaC02g19970D	GSBRNA2T00030966001	1233	hypoxia-responsive	AT1G70550.1		NEP-interacting protein, putative (DUF239)	Chr1:26597067-26600445 FORWARD LENGTH=2398	2398	0	AT1G70550	260363_at	0	5		AT1G70550	0	0	BnaC02g19970D	-1.78107	-1.36763	-0.162366	-2.04936	-1.33178	-0.306076	1.02511e-06	0.000409323	0.893902	2.44616e-08	0.000558145	0.730693	BnaC02g19970D	-2.38541	0.00012354	-1.91625	6.56e-05	-1.46529	2.3e-06
BnaA06g18430D	GSBRNA2T00107312001	1674	hypoxia-responsive	AT3G45650.1	NAXT1	nitrate excretion transporter1	Chr3:16758877-16761430 FORWARD LENGTH=2217	2217	0	AT3G45650	252589_s_at	1	6		AT3G45650	0	0	BnaA06g18430D	-4.53943	-3.17917	1.41555	-3.89698	-2.62385	-0.0383144	7.10612e-13	4.92468e-07	0.181287	3.15957e-10	2.43077e-05	1	BnaA06g18430D	-2.3034	7.6856e-13	-1.19361	0.00462197	-3.04477	1.79e-11
BnaC03g55450D	GSBRNA2T00143967001	819	hypoxia-responsive	AT3G45650.2	NAXT1	nitrate excretion transporter1	Chr3:16758877-16761430 FORWARD LENGTH=2295	2295	0	AT3G45650	252589_s_at	1	6		AT3G45650	0	0	BnaC03g55450D	-3.60376	-2.09313	1.29772	-3.13927	-1.98158	-0.181089	5.12039e-08	0.00300321	0.554812	8.17586e-07	0.00254934	0.984856	BnaC03g55450D	-3.23297	3.59022e-06	-1.92188	0.00267146	-2.42458	7.07e-06
BnaC01g35360D	GSBRNA2T00040172001	1404		AT2G33070.1	NSP2	nitrile specifier protein 2	Chr2:14029190-14031074 REVERSE LENGTH=1716	1716	0	AT2G33070	245161_at	2	1		AT2G33070	0	0	BnaC01g35360D	-2.10808	-2.36944	-0.461201	-1.82924	-1.77569	-0.0261241	9.86454e-07	1.50498e-07	0.628566	3.13115e-05	9.21785e-05	1	BnaC01g35360D	-3.19026	1.54382e-16	-1.5857	3.9e-28	-2.11371	9.61e-144
BnaA08g13030D	GSBRNA2T00021800001	1104	hypoxia-responsive	AT4G30420.2	UMAMIT34	nodulin MtN21 /EamA-like transporter family protein	Chr4:14876905-14878914 FORWARD LENGTH=1286	1286	0	AT4G30420	253618_at	1	4		AT4G30420	0	0	BnaA08g13030D	-3.27772	-2.19855	2.25169	-2.46999	-2.3782	-3.54898	2.66691e-15	1.55301e-07	0.638434	2.27138e-09	2.81636e-08	0.420565	BnaA08g13030D	-3.88594	8.24366e-08	-1.9657	0.00020415	-1.50614	2.98e-10
BnaC05g27230D	GSBRNA2T00106603001	1761		AT1G38131.1		O-fucosyltransferase family protein	Chr1:14292996-14296253 REVERSE LENGTH=2399	2399	0	AT1G38131					AT1G38131	0	0	BnaC05g27230D	-3.90036	-1.87183	-0.22984	-2.56088	-2.14139	0.190991	6.92885e-23	1.62317e-06	0.815205	2.50488e-11	8.42025e-08	0.879013	BnaC05g27230D	-1.37511	8.42536e-06	-1.83536	1.64e-05	-2.14695	8.09e-12
BnaAnng16070D	GSBRNA2T00027392001	1146		AT1G77520.1		O-methyltransferase family protein	Chr1:29130375-29132272 FORWARD LENGTH=1593	1593	0	AT1G77520					AT1G77520	0	0	BnaAnng16070D	-3.63286	-2.84432	-0.845742	-3.0084	-3.009	0.810046	1.32344e-08	2.01885e-05	0.887777	2.57704e-06	4.64217e-06	0.725771	BnaAnng16070D	-1.2559	0.00103431	-2.3007	1.42e-10	-3.12069	9.32e-156
BnaA02g18320D	GSBRNA2T00065742001	1146		AT1G77520.1		O-methyltransferase family protein	Chr1:29130375-29132272 FORWARD LENGTH=1593	1593	0	AT1G77520					AT1G77520	0	0	BnaA02g18320D	-4.07372	-2.79233	-2.47362	-3.36587	-3.47756	-2.26304	5.58155e-12	4.03442e-06	0.0575243	8.28237e-09	6.25752e-09	0.0571661	BnaA02g18320D	-1.07399	2.12204e-05	-1.71268	3.7e-42	-1.21574	1.68e-49
BnaC07g45430D	GSBRNA2T00100055001	984	hypoxia-responsive	AT4G35150.1		O-methyltransferase family protein	Chr4:16726948-16728531 REVERSE LENGTH=978	978	0	AT4G35150	253177_s_at	2	13		AT4G35150	0	0	BnaC07g45430D	-3.42997	-2.2375	-0.0332436	-2.9676	-2.66914	-2.11787	1.12191e-10	5.48424e-05	1	2.18402e-08	8.592e-07	0.727126	BnaC07g45430D	-3.64239	1.7203e-06	-3.26432	6.02e-06	-3.63828	1.87e-07
BnaC07g45440D	GSBRNA2T00100056001	963	hypoxia-responsive	AT4G35150.1		O-methyltransferase family protein	Chr4:16726948-16728531 REVERSE LENGTH=978	978	0	AT4G35150	253177_s_at	2	13		AT4G35150	0	0	BnaC07g45440D	-4.52049	-2.75609	0.322156	-3.23412	-3.02904	-0.0790791	8.93967e-16	9.18679e-07	0.872454	2.2438e-09	4.17205e-08	1	BnaC07g45440D	-3.00773	1.08584e-28	-3.34172	5.97e-14	-2.64944	9.48e-05
BnaA03g18490D	GSBRNA2T00124773001	1431	hypoxia-responsive	AT2G39220.1	PLP6	PATATIN-like protein 6	Chr2:16374881-16377168 REVERSE LENGTH=2179	2179	0	AT2G39220	267012_at	0	7		AT2G39220	0	0	BnaA03g18490D	-2.39107	-2.02234	-0.0134281	-1.96838	-2.00968	0.118473	6.87826e-13	2.3674e-09	1	3.8851e-09	2.63505e-09	0.958346	BnaA03g18490D	-3.79174	5.66373e-25	-2.22065	1.2e-16	-2.76707	2.01e-38
BnaC03g21980D	GSBRNA2T00028775001	1431	hypoxia-responsive	AT2G39220.1	PLP6	PATATIN-like protein 6	Chr2:16374881-16377168 REVERSE LENGTH=2179	2179	0	AT2G39220	267012_at	0	7		AT2G39220	0	0	BnaC03g21980D	-2.90594	-1.74772	-0.499876	-2.35483	-1.355	0.308112	8.29208e-14	1.36371e-05	0.544206	1.43288e-09	0.000809606	0.784609	BnaC03g21980D	-2.99871	8.71094e-05	-1.38538	0.000607491	-2.66465	1.14e-17
BnaA07g38610D	GSBRNA2T00019702001	1224	hypoxia-responsive	AT1G67750.1		Pectate lyase family protein	Chr1:25401514-25403595 FORWARD LENGTH=1803	1803	0	AT1G67750	245196_at	0	7		AT1G67750	0	0	BnaA07g38610D	-3.36465	-1.73712	0.273638	-2.07195	-2.44633	-0.214606	1.82754e-10	0.00137807	0.867652	7.2879e-05	4.49296e-06	0.925712	BnaA07g38610D	-2.56024	7.89149e-27	-2.30549	6.77e-33	-2.23976	6.68e-115
BnaA04g25450D	GSBRNA2T00045147001	1182	hypoxia-responsive	AT2G43880.1		Pectin lyase-like superfamily protein	Chr2:18172889-18174674 FORWARD LENGTH=1522	1522	0	AT2G43880	267222_at	0	10		AT2G43880	0	0	BnaA04g25450D	-6.46755	-2.69798	-0.0241792	-8.92897	-3.5504	0.0104563	4.91457e-11	0.00277845	1	3.99658e-11	0.000200285	1	BnaA04g25450D	-3.70024	3.43667e-07	-4.659	7.66e-06	-5.20141	1.17e-23
BnaC05g46700D	GSBRNA2T00073919001	1509	hypoxia-responsive	AT3G42950.1		Pectin lyase-like superfamily protein	Chr3:15015086-15018653 FORWARD LENGTH=2605	2605	0	AT3G42950	252781_at	0	3		AT3G42950	0	0	BnaC05g46700D	-2.26754	-1.12819	-0.135305	-1.56949	-1.21878	-0.147769	2.17059e-17	7.2505e-05	0.896063	5.98521e-09	1.33406e-05	0.888921	BnaC05g46700D	-1.63603	9.11309e-11	-1.18126	6.81e-07	-1.96195	6.5e-33
BnaA05g25150D	GSBRNA2T00104777001	1779	hypoxia-responsive	AT3G14310.1	PME3	pectin methylesterase 3	Chr3:4771833-4775258 REVERSE LENGTH=2323	2323	0	AT3G14310	258369_at	0	13		AT3G14310	0	0	BnaA05g25150D	-2.92391	-1.49594	-0.0566326	-2.80634	-1.55312	-0.911936	1.62741e-09	0.00403438	1	8.49081e-09	0.00217953	0.288485	BnaA05g25150D	-2.386	9.66471e-36	-1.24963	1.36e-21	-2.12606	4.22e-54
BnaC09g15790D	GSBRNA2T00100943001	1266	hypoxia-responsive	AT1G57590.1		Pectinacetylesterase family protein	Chr1:21327360-21329944 REVERSE LENGTH=1670	1670	0	AT1G57590	246403_at	0	7		AT1G57590	0	0	BnaC09g15790D	-5.58447	-3.40334	0.00138512	-3.97731	-3.42159	0.936567	1.91009e-19	5.38647e-09	1	2.13886e-12	3.35771e-09	0.622459	BnaC09g15790D	-3.29255	4.4605e-07	-1.86956	0.000867334	-2.63046	3.52e-12
BnaA06g39520D	GSBRNA2T00074772001	1254	hypoxia-responsive	AT5G26670.1		Pectinacetylesterase family protein	Chr5:9317968-9321076 FORWARD LENGTH=1999	1999	0	AT5G26670	246837_at	0	2		AT5G26670	0	0	BnaA06g39520D	-1.54097	-1.43065	0.387811	-1.57804	-1.37076	-0.74235	0.000342289	0.00224932	0.711141	0.000375239	0.00328852	0.414416	BnaA06g39520D	-1.59201	6.5372e-07	-1.67257	2.04e-06	-2.77658	2.6e-15
BnaA04g29190D	GSBRNA2T00016831001	987	hypoxia-responsive	AT2G37130.1		Peroxidase superfamily protein	Chr2:15597921-15600154 REVERSE LENGTH=1438	1438	0	AT2G37130	265471_at	3	3		AT2G37130	0	0	BnaA04g29190D	-1.40485	-2.15455	-0.628083	-1.53651	-1.89473	0.715068	0.000326891	1.17893e-07	0.379414	0.000116355	3.15599e-06	0.334434	BnaA04g29190D	-1.82725	0.00013279	-1.44649	6.13e-14	-2.19914	9.62e-13
BnaA09g08390D	GSBRNA2T00063701001	903		AT3G32980.1		Peroxidase superfamily protein	Chr3:13526071-13530098 REVERSE LENGTH=1541	1541	0	AT3G32980					AT3G32980	0	0	BnaA09g08390D	-1.61955	-1.36112	-0.122118	-1.32252	-1.39351	-0.230938	2.0769e-05	0.000964532	0.959191	0.000784287	0.000560861	0.860386	BnaA09g08390D	-3.16686	4.58542e-27	-1.12163	1.71e-09	-1.9085	3.45e-36
BnaA03g06740D	GSBRNA2T00130201001	933	hypoxia-responsive	AT5G17820.2		Peroxidase superfamily protein	Chr5:5887906-5890260 REVERSE LENGTH=1390	1390	0	AT5G17820	250059_at	3	10		AT5G17820	0	0	BnaA03g06740D	-3.16337	-1.84556	-0.0206557	-2.30994	-1.76459	-0.00475106	1.2584e-07	0.004227	1	0.000129743	0.00603693	1	BnaA03g06740D	-3.26178	1.6925e-06	-2.90761	8.6e-41	-3.92694	3.2e-137
BnaA08g29870D	GSBRNA2T00064422001	1239	hypoxia-responsive	AT1G50280.1		Phototropic-responsive NPH3 family protein	Chr1:18623698-18626441 REVERSE LENGTH=1886	1886	0	AT1G50280	262464_at	0	2		AT1G50280	0	0	BnaA08g29870D	-2.01067	-1.76732	-0.00667003	-1.62296	-1.66164	-0.0283354	1.36165e-06	3.98421e-05	1	0.000264561	0.000146239	1	BnaA08g29870D	-1.79975	0.000580787	-2.21294	0.00101736	-1.69105	0.0041573
BnaA09g30040D	GSBRNA2T00015813001	561	hypoxia-responsive	AT1G23205.1		Plant invertase/pectin methylesterase inhibitor superfamily protein	Chr1:8233953-8235019 REVERSE LENGTH=1067	1067	3e-140	AT1G23205	264898_at	9	4		AT1G23205	0	0	BnaA09g30040D	-1.68776	-1.59085	0.294495	-1.29425	-1.22147	-0.478538	6.91299e-05	0.000396493	0.802453	0.00341174	0.00662546	0.636315	BnaA09g30040D	-3.87601	1.05244e-05	-2.4481	7.22e-16	-3.38041	1.28e-38
BnaA03g08820D	GSBRNA2T00148824001	783	hypoxia-responsive	AT5G60660.1	PIP2;4	plasma membrane intrinsic protein 2;4	Chr5:24375368-24377206 REVERSE LENGTH=1448	1448	0	AT5G60660	247586_at	3	12		AT5G60660	0	1	BnaA03g08820D	-3.54183	-3.31322	0.105109	-3.212	-2.65845	0.559776	9.70603e-20	3.83977e-17	0.981162	1.00442e-16	1.00592e-11	0.552349	BnaA03g08820D	-1.70568	0.000207337	-1.47307	8.04e-20	-1.66369	2.32e-57
BnaC02g46990D	GSBRNA2T00046655001	1125		AT5G45490.1		P-loop containing nucleoside triphosphate hydrolases superfamily protein	Chr5:18430717-18432430 FORWARD LENGTH=1714	1714	0	AT5G45490	248943_s_at	6	0		AT5G45490	0	0	BnaC02g46990D	-2.95535	-1.33971	0.28488	-2.37516	-1.88793	0.395881	1.61144e-20	5.802e-05	0.710773	7.98529e-14	5.60964e-09	0.59143	BnaC02g46990D	-1.63362	4.32861e-09	-1.04632	4.81e-05	-1.27445	5.74e-31
BnaC04g51910D	GSBRNA2T00022566001	2955	hypoxia-responsive	AT2G47500.1		P-loop nucleoside triphosphate hydrolases superfamily protein with CH (Calponin Homology) domain-containing protein	Chr2:19492867-19498189 FORWARD LENGTH=3639	3639	0	AT2G47500	245174_at	0	2		AT2G47500	0	0	BnaC04g51910D	-3.55629	-1.68381	0.224183	-2.56242	-1.46045	0.0476804	9.51044e-21	1.39654e-05	0.841279	6.83386e-12	0.000160313	1	BnaC04g51910D	-1.91676	6.00058e-17	-1.41932	0.00060281	-2.03376	4.04e-44
BnaA09g29940D	GSBRNA2T00033999001	519	hypoxia-responsive	AT1G23720.1		Proline-rich extensin-like family protein	Chr1:8388655-8391540 FORWARD LENGTH=2886	2886	4e-151	AT1G23720	265169_x_at	2	2		AT1G23720	0	0	BnaA09g29940D	-2.01037	-1.38033	-0.0257711	-1.78533	-1.4533	-2.14224	5.6287e-06	0.00449292	1	8.17388e-05	0.00239874	0.725771	BnaA09g29940D	-2.28938	8.05093e-10	-2.23361	7e-45	-3.08881	8.26e-111
BnaC02g35050D	GSBRNA2T00063503001	1815	hypoxia-responsive	AT2G03480.1	QUL2	QUASIMODO2 LIKE 2	Chr2:1050706-1054478 FORWARD LENGTH=2676	2676	0	AT2G03480	265715_s_at	0	24		AT2G03480	0	2	BnaC02g35050D	-1.27448	-1.40646	-0.136626	-1.29113	-1.43953	0.165187	0.000230413	7.79238e-05	0.93708	0.000107052	1.86131e-05	0.909935	BnaC02g35050D	-1.13065	0.000455695	-1.10365	0.00039812	-1.03138	3.5e-06
BnaA04g12520D	GSBRNA2T00090215001	633	hypoxia-responsive	AT2G21880.1	RAB7A	RAB GTPase homolog 7A	Chr2:9324633-9326426 REVERSE LENGTH=1161	1161	0	AT2G21880	263876_at	1	14		AT2G21880	0	0	BnaA04g12520D	-2.48816	-1.77187	0.637922	-1.90049	-1.40292	0.431346	5.30158e-12	2.1852e-06	0.369062	2.27385e-07	0.00020512	0.652721	BnaA04g12520D	-1.53256	0.000895817	-3.51874	6.58e-31	-2.98073	2.15e-45
BnaC04g16630D	GSBRNA2T00148271001	510	hypoxia-responsive	AT2G27740.1		RAB6-interacting golgin (DUF662)	Chr2:11822513-11823857 FORWARD LENGTH=1094	1094	0	AT2G27740	266244_at	0	5		AT2G27740	0	0	BnaC04g16630D	-1.23384	-1.26977	0.916124	-1.20856	-1.19374	0.344848	0.000418085	0.0011411	0.177945	0.000865616	0.00166784	0.770075	BnaC04g16630D	-1.81836	0.000102367	-1.1884	0.00522875	-1.56634	1.58e-06
BnaC06g14220D	GSBRNA2T00071335001	498	hypoxia-responsive	AT3G52900.1		RAB6-interacting golgin (DUF662)	Chr3:19613078-19614027 FORWARD LENGTH=726	726	0	AT3G52900	252025_at	0	3		AT3G52900	0	0	BnaC06g14220D	-1.7656	-1.67784	0.220607	-1.59379	-1.88568	0.353827	3.80461e-06	3.13207e-05	0.85858	4.74474e-05	1.967e-06	0.727542	BnaC06g14220D	-1.29921	0.00160547	-1.44998	1.04e-07	-1.59748	7.67e-12
BnaA08g25770D	GSBRNA2T00015093001	762	hypoxia-responsive	AT1G10470.1	ARR4	response regulator 4	Chr1:3441988-3444360 REVERSE LENGTH=2017	2017	0	AT1G10470	263236_at	0	16		AT1G10470	0	1	BnaA08g25770D	-1.47619	-2.14992	-1.50336	-2.16182	-2.89263	-1.39657	0.00467163	9.62508e-05	0.033088	5.64904e-05	1.42729e-07	0.0894195	BnaA08g25770D	-2.11276	1.08906e-19	-2.33284	1.02e-08	-2.89341	3.45e-56
BnaA06g06240D	GSBRNA2T00156087001	762	hypoxia-responsive	AT1G10470.1	ARR4	response regulator 4	Chr1:3441988-3444360 REVERSE LENGTH=2017	2017	0	AT1G10470	263236_at	0	16		AT1G10470	0	1	BnaA06g06240D	-2.47734	-2.48565	-1.46083	-2.07637	-2.81953	-0.770312	4.30583e-07	1.4149e-06	0.0248428	2.98386e-05	2.8509e-08	0.418315	BnaA06g06240D	-2.23704	8.82214e-10	-1.6104	7.07e-05	-3.17742	3.62e-30
BnaC03g51340D	GSBRNA2T00141512001	573	hypoxia-responsive	AT5G62920.1	ARR6	response regulator 6	Chr5:25252007-25254318 REVERSE LENGTH=1459	1459	0	AT5G62920	247406_at	0	17		AT5G62920	0	0	BnaC03g51340D	-2.15127	-1.62802	-2.21431	-1.5523	-2.39494	-1.49438	5.00242e-05	0.00484705	0.000934755	0.00465532	1.55488e-05	0.0546233	BnaC03g51340D	-2.1873	2.23076e-10	-1.09871	0.00205712	-1.51075	2.58e-07
BnaC08g27970D	GSBRNA2T00155875001	708	hypoxia-responsive	AT3G57040.1	ARR9	response regulator 9	Chr3:21109414-21111503 FORWARD LENGTH=1625	1625	0	AT3G57040	251665_at	0	11		AT3G57040	0	1	BnaC08g27970D	-1.08816	-1.27246	-0.778901	-1.54817	-1.56872	-0.457852	0.0034947	0.00155061	0.216982	3.68243e-05	5.35062e-05	0.582433	BnaC08g27970D	-3.14249	1.37546e-31	-1.14415	0.000254338	-2.359	1.04e-23
BnaC04g24580D	GSBRNA2T00046988001	699	hypoxia-responsive	AT3G57040.1	ARR9	response regulator 9	Chr3:21109414-21111503 FORWARD LENGTH=1625	1625	0	AT3G57040	251665_at	0	11		AT3G57040	0	1	BnaC04g24580D	-1.86872	-1.54112	-0.105341	-1.77772	-1.9009	-0.334044	1.14039e-07	3.33412e-05	0.966259	6.74908e-07	1.6402e-07	0.725771	BnaC04g24580D	-2.05907	3.28463e-05	-2.1371	0.00382281	-2.26849	4.69e-07
BnaA04g03000D	GSBRNA2T00126266001	678	hypoxia-responsive	AT3G57040.1	ARR9	response regulator 9	Chr3:21109414-21111503 FORWARD LENGTH=1625	1625	0	AT3G57040	251665_at	0	11		AT3G57040	0	1	BnaA04g03000D	-3.37765	-2.36677	-0.506878	-3.14292	-2.65007	-0.795975	4.31837e-12	1.12453e-06	0.638434	1.10289e-10	3.3012e-08	0.427061	BnaA04g03000D	-1.97503	9.19486e-06	-1.849	0.00251989	-2.57705	2.69e-07
BnaA09g54630D	GSBRNA2T00025515001	1101	hypoxia-responsive	AT1G23980.1		RING/U-box superfamily protein	Chr1:8484703-8486002 REVERSE LENGTH=1300	1300	0	AT1G23980	263024_at	0	2		AT1G23980	0	0	BnaA09g54630D	-1.47862	-1.62183	-0.0559746	-1.20831	-1.74215	0.0138414	8.20686e-06	1.44998e-06	1	0.000466998	1.66556e-07	1	BnaA09g54630D	-1.45228	1.11129e-05	-1.36572	1.12e-05	-1.24004	1.53e-05
BnaC05g19060D	GSBRNA2T00087872001	1068	hypoxia-responsive	AT1G23980.1		RING/U-box superfamily protein	Chr1:8484703-8486002 REVERSE LENGTH=1300	1300	0	AT1G23980	263024_at	0	2		AT1G23980	0	0	BnaC05g19060D	-2.92402	-2.03448	0.141565	-2.07109	-1.6974	-0.368374	3.97535e-14	7.22857e-08	0.94655	5.26851e-08	6.28919e-06	0.733531	BnaC05g19060D	-1.32861	0.00128277	-2.39592	1.45e-06	-1.92994	3.81e-07
BnaA10g10270D	GSBRNA2T00095507001	705		AT5G56120.1		RNA polymerase II elongation factor	Chr5:22721373-22722613 FORWARD LENGTH=1165	1165	0	AT5G56120					AT5G56120	0	0	BnaA10g10270D	-4.53322	-1.86499	0.0172878	-3.62562	-2.01504	-0.478419	5.54647e-16	0.000518139	1	1.76331e-11	0.000177473	0.737814	BnaA10g10270D	-4.11189	5.68757e-32	-1.31129	0.0494758	-2.91912	2.01e-22
BnaC08g07230D	GSBRNA2T00139871001	1839	hypoxia-responsive	AT1G33170.1		S-adenosyl-L-methionine-dependent methyltransferases superfamily protein	Chr1:12026936-12030539 FORWARD LENGTH=2388	2388	0	AT1G33170	261593_at	0	3		AT1G33170	0	0	BnaC08g07230D	-4.02648	-3.56385	0.239928	-3.22209	-3.24004	0.136761	1.6463e-18	6.42746e-20	0.742821	1.19222e-14	2.06032e-16	0.912038	BnaC08g07230D	-2.28353	2.57736e-16	-2.0815	0.0056945	-1.2061	3.6e-14
BnaCnng01670D	GSBRNA2T00123506001	402	hypoxia-responsive	AT4G00880.1		SAUR-like auxin-responsive protein family	Chr4:366373-367274 REVERSE LENGTH=902	902	2e-128	AT4G00880	255645_at	0	21		AT4G00880	0	0	BnaCnng01670D	-2.5143	-1.8964	-0.557371	-2.68872	-2.51535	-0.0542697	8.19738e-12	6.88458e-07	0.406045	5.70817e-13	2.21659e-11	1	BnaCnng01670D	-2.44918	0.000872408	-3.06935	1.41e-33	-2.32088	7.25e-26
BnaA01g36120D	GSBRNA2T00006738001	474	hypoxia-responsive	AT1G61667.1		serine protease, putative (Protein of unknown function, DUF538)	Chr1:22767617-22768501 FORWARD LENGTH=760	760	0	AT1G61667	265005_at	1	5		AT1G61667	0	0	BnaA01g36120D	-2.90413	-2.51196	-1.08776	-2.6002	-2.76149	-0.994083	1.26819e-11	7.1608e-09	0.0739444	1.34497e-09	1.58417e-10	0.139541	BnaA01g36120D	-2.79284	4.44301e-14	-2.54748	7.27e-06	-7.10185	3.6e-08
BnaC07g46390D	GSBRNA2T00100164001	1626	hypoxia-responsive	AT4G37160.1	sks15	SKU5 similar 15	Chr4:17494512-17497276 REVERSE LENGTH=2086	2086	0	AT4G37160	246229_at	3	19		AT4G37160	0	0	BnaC07g46390D	-6.06251	-2.45904	-2.33338	-5.40402	-2.89413	-3.4068	5.77795e-11	0.0067531	0.638434	3.30852e-09	0.00112593	0.474599	BnaC07g46390D	-1.75967	0.00190757	-2.10579	3.32e-17	-2.68642	1.16e-40
BnaC02g14790D	GSBRNA2T00102241001	798		AT5G52990.1		SNARE-like superfamily protein	Chr5:21483919-21485385 FORWARD LENGTH=1467	1467	4e-165	AT5G52990					AT5G52990	0	0	BnaC02g14790D	-3.1519	-1.47315	-0.0324878	-1.90822	-1.50859	0.148938	1.77936e-09	0.00745333	1	0.000350535	0.00622871	1	BnaC02g14790D	-1.66732	9.6439e-10	-2.28261	4.86e-12	-2.60657	8.26e-19
BnaCnng04500D	GSBRNA2T00026608001	417	hypoxia-responsive	AT1G26210.1	SOFL1	SOB five-like 1	Chr1:9067039-9068207 FORWARD LENGTH=1073	1073	1e-136	AT1G26210	245816_at	0	17		AT1G26210			BnaCnng04500D	-2.5482	-3.03043	0.401328	-2.51003	-2.59546	-0.982565	3.69253e-07	4.68844e-09	0.710157	9.65834e-07	2.5476e-07	0.212614	BnaCnng04500D	-1.2452	0.0036545	-1.69059	0.00775286	-2.32131	9.64e-09
BnaC05g21280D	GSBRNA2T00142279001	1104		AT1G27370.7	SPL10	squamosa promoter binding protein-like 10	Chr1:9505202-9508322 REVERSE LENGTH=1673	1673	0	AT1G27370	264489_at	0	1		AT1G27370	0	0	BnaC05g21280D	-2.59362	-1.29489	0.230703	-1.73735	-1.40658	0.062121	4.73228e-09	0.00142055	0.794254	9.3261e-05	0.00112658	1	BnaC05g21280D	-1.71603	0.000878005	-1.22057	0.00382613	-1.6185	2.87e-09
BnaAnng14590D	GSBRNA2T00022265001	2346	hypoxia-responsive	AT1G20160.2	ATSBT5.2	Subtilisin-like serine endopeptidase family protein	Chr1:6990784-6993972 REVERSE LENGTH=2383	2383	1e-18	AT1G20160	261224_at	0	7		AT1G20160	0	0	BnaAnng14590D	-3.97201	-2.49094	0.820071	-4.28145	-2.70732	-0.0274638	6.35538e-20	4.58896e-09	0.3666	2.70068e-22	1.43596e-10	1	BnaAnng14590D	-4.96246	2.05096e-23	-4.26058	6.14e-09	-4.66198	1.23e-17
BnaA07g23350D	GSBRNA2T00099581001	1545	hypoxia-responsive	AT1G71880.1	SUC1	sucrose-proton symporter 1	Chr1:27054030-27056464 FORWARD LENGTH=2210	2210	0	AT1G71880	260143_at	4	10		AT1G71880	1	0	BnaA07g23350D	-3.85462	-2.83062	0.119344	-3.99094	-3.09463	-0.0906889	1.76756e-11	1.05292e-06	0.988151	5.32117e-12	8.52233e-08	1	BnaA07g23350D	-2.53836	6.72611e-22	-1.49427	2.07e-06	-1.08181	7.66e-20
BnaA09g18130D	GSBRNA2T00058073001	813	hypoxia-responsive	AT5G46700.1	TRN2	Tetraspanin family protein	Chr5:18950843-18953127 FORWARD LENGTH=1690	1690	0	AT5G46700	248861_at	0	11		AT5G46700	0	0	BnaA09g18130D	-2.31688	-1.08367	0.251749	-2.00611	-1.68439	0.429349	1.91961e-11	0.00396263	0.855757	1.17934e-08	3.33679e-06	0.688855	BnaA09g18130D	-1.8989	7.64292e-07	-2.46238	4.68e-06	-2.27402	3.07e-07
BnaA05g11910D	GSBRNA2T00048560001	309	hypoxia-responsive	AT2G30540.1		Thioredoxin superfamily protein	Chr2:13011105-13012043 REVERSE LENGTH=939	939	2e-120	AT2G30540	267497_at	4	2		AT2G30540	0	0	BnaA05g11910D	-2.77513	-3.54575	-0.631567	-2.05473	-3.78691	-0.112322	8.09012e-11	1.51717e-15	0.267771	2.6383e-07	1.14423e-19	0.962536	BnaA05g11910D	-2.48278	2.54664e-05	-1.34256	0.00808051	-1.91868	3.14e-07
BnaC03g31560D	GSBRNA2T00153470001	894	hypoxia-responsive	AT4G01390.1		TRAF-like family protein	Chr4:570200-571595 REVERSE LENGTH=945	945	1e-152	AT4G01390	255621_at	0	4		AT4G01390	0	0	BnaC03g31560D	-3.0364	-2.79113	-0.789102	-2.86862	-4.15762	-0.136918	6.24698e-09	3.05383e-07	0.400534	5.52874e-08	6.03377e-14	0.981935	BnaC03g31560D	-1.92002	5.88483e-05	-2.52106	0.000646294	-2.12807	2.61e-09
BnaC06g21580D	GSBRNA2T00143836001	957	hypoxia-responsive	AT1G76870.1		transcription factor	Chr1:28857250-28858530 FORWARD LENGTH=1281	1281	3e-155	AT1G76870	256330_at	0	2		AT1G76870	0	0	BnaC06g21580D	-2.17235	-2.23679	-0.536563	-2.09054	-1.5307	-0.607814	3.99753e-05	1.73182e-05	0.446483	0.000992252	0.00608665	0.434457	BnaC06g21580D	-4.05968	6.23608e-10	-3.28961	8.62e-05	-3.51779	1.08e-05
BnaA02g34160D	GSBRNA2T00047501001	705	hypoxia-responsive	AT5G64340.1	SAC51	transcription factor SAC51	Chr5:25730335-25733313 REVERSE LENGTH=2471	2471	6e-99	AT5G64340	247273_at	0	5		AT5G64340	0	0	BnaA02g34160D	-1.991	-1.96368	-0.355851	-1.28994	-1.27408	0.271311	1.90186e-07	2.53017e-07	0.686717	0.0021645	0.00179521	0.835434	BnaA02g34160D	-1.91946	0.000388456	-1.1341	0.0104875	-1.56123	1.3e-06
BnaA03g03040D	GSBRNA2T00129768001	1887		AT5G10630.5		Translation elongation factor EF1A/initiation factor IF2gamma family protein	Chr5:3360519-3364619 FORWARD LENGTH=2254	2254	0	AT5G10630	250452_at	0	0		AT5G10630	0	0	BnaA03g03040D	-2.05175	-1.32089	-0.817008	-1.15581	-1.56491	-0.436062	1.65511e-07	0.00140022	0.164853	0.0057998	0.000175783	0.633328	BnaA03g03040D	-1.47943	0.00343397	-1.33387	5.91e-07	-1.62883	5.03e-11
BnaUnng00280D	GSBRNA2T00038455001	1359		AT5G41800.1		Transmembrane amino acid transporter family protein	Chr5:16733663-16736093 FORWARD LENGTH=1743	1743	0	AT5G41800	249283_at	0	0		AT5G41800	0	0	BnaUnng00280D	-2.71083	-1.40193	-0.199945	-1.77945	-1.63188	0.170454	2.84089e-21	3.11275e-07	0.789473	8.29503e-11	1.19991e-09	0.850076	BnaUnng00280D	-1.98786	0.00182795	-1.60473	0.0178933	-1.39433	0.0221455
BnaC06g07230D	GSBRNA2T00053675001	180	hypoxia-responsive	AT1G55335.1		transmembrane protein	Chr1:20648469-20648832 FORWARD LENGTH=364	364	4e-43	AT1G55335	259664_at	2	6		AT1G55335	0	0	BnaC06g07230D	-3.94173	-1.73597	-0.553548	-2.97758	-1.38528	-0.967683	3.10142e-18	0.000128547	0.465096	8.08778e-12	0.00221284	0.127437	BnaC06g07230D	-1.65119	7.12356e-09	-1.56759	7.39e-20	-2.67725	1.07e-37
BnaA06g00380D	GSBRNA2T00024570001	180	hypoxia-responsive	AT1G55335.1		transmembrane protein	Chr1:20648469-20648832 FORWARD LENGTH=364	364	4e-43	AT1G55335	259664_at	2	6		AT1G55335	0	0	BnaA06g00380D	-4.04335	-1.98163	-0.183041	-3.31173	-1.76686	-0.853097	8.50542e-22	2.56828e-06	0.896827	1.60967e-15	3.1857e-05	0.190414	BnaA06g00380D	-3.33358	1.34867e-28	-2.62161	8.94e-35	-3.6415	1.49e-55
BnaC03g39860D	GSBRNA2T00123908001	651	hypoxia-responsive	AT3G17120.2		transmembrane protein	Chr3:5841317-5843547 FORWARD LENGTH=1746	1746	0	AT3G17120	257875_at	0	5		AT3G17120	0	0	BnaC03g39860D	-1.67806	-1.30134	-0.393724	-1.76929	-1.46828	-0.125078	2.59542e-08	5.45679e-05	0.447833	8.93771e-09	4.14454e-06	0.917349	BnaC03g39860D	-1.64557	1.35299e-06	-1.55856	1.49e-09	-1.91606	9.21e-19
BnaA08g15190D	GSBRNA2T00027243001	564		AT4G36230.1		transmembrane protein	Chr4:17145525-17146544 FORWARD LENGTH=1020	1020	4e-75	AT4G36230	253082_at	0	0		AT4G36230	0	0	BnaA08g15190D	-2.88857	-1.83957	0.203361	-2.03878	-1.11549	0.0300064	5.80179e-14	2.00794e-07	0.820529	1.70859e-08	0.00182091	1	BnaA08g15190D	-1.73219	0.000120295	-3.85629	1.99e-15	-2.85221	9.08e-16
BnaA03g40120D	GSBRNA2T00113556001	975	hypoxia-responsive	AT5G61340.1		transmembrane protein	Chr5:24661735-24663139 REVERSE LENGTH=1405	1405	0	AT5G61340	247522_at	0	11		AT5G61340	0	0	BnaA03g40120D	-2.35783	-1.75312	-0.183646	-2.19353	-1.37382	0.89007	6.91361e-07	0.000566379	0.960578	8.32288e-06	0.00804897	0.444279	BnaA03g40120D	-1.78848	0.000319579	-1.7513	0.000333659	-2.45663	5.72e-09
BnaCnng46150D	GSBRNA2T00045424001	360		AT3G20510.1		Transmembrane proteins 14C	Chr3:7160677-7162395 FORWARD LENGTH=971	971	7e-133	AT3G20510	257088_at	2	1		AT3G20510	0	0	BnaCnng46150D	-2.99003	-2.05345	-0.486855	-2.15912	-2.09744	-0.261897	4.34136e-13	9.84814e-07	0.57019	2.10149e-07	5.64865e-07	0.844828	BnaCnng46150D	-1.3711	2.31052e-05	-1.16866	0.00823112	-1.2043	1.92e-05
BnaA05g09090D	GSBRNA2T00050240001	1335		AT5G44340.1	TUB4	tubulin beta chain 4	Chr5:17859136-17861150 REVERSE LENGTH=1797	1797	0	AT5G44340	249049_at	0	0		AT5G44340	0	0	BnaA05g09090D	-1.89531	-2.25947	-0.103655	-1.53982	-1.83289	-0.431816	2.8836e-07	3.7683e-09	0.9663	2.69726e-05	8.24748e-07	0.59874	BnaA05g09090D	-1.35319	1.80639e-08	-1.16705	0.000126151	-1.03647	7.82e-09
BnaA04g19910D	GSBRNA2T00064569001	1377		AT5G03490.1		UDP-Glycosyltransferase superfamily protein	Chr5:871204-873072 FORWARD LENGTH=1869	1869	0	AT5G03490	250948_at	2	0		AT5G03490	0	0	BnaA04g19910D	-2.67896	-1.24631	0.598122	-2.17757	-2.06162	0.0505329	4.21797e-11	0.00367689	0.435136	3.16289e-07	6.62242e-07	1	BnaA04g19910D	-4.21408	1.59675e-10	-1.68083	0.00191783	-3.27186	8.37e-08
BnaA08g30690D	GSBRNA2T00047941001	972	hypoxia-responsive	AT4G31600.1	UTr7	UDP-N-acetylglucosamine (UAA) transporter family	Chr4:15314867-15317160 REVERSE LENGTH=1588	1588	0	AT4G31600	253486_at	0	11		AT4G31600	0	0	BnaA08g30690D	-2.87615	-1.74152	0.0141635	-2.35247	-2.43705	-0.198053	7.49764e-07	0.00509841	1	9.50751e-05	0.000118615	0.962919	BnaA08g30690D	-1.44444	1.96162e-05	-1.4354	0.00775807	-1.76277	2.96e-12
BnaA03g31780D	GSBRNA2T00111582001	615	hypoxia-responsive	AT3G11550.1	CASP2	Uncharacterized protein family (UPF0497)	Chr3:3638178-3639348 FORWARD LENGTH=995	995	0	AT3G11550	259291_at	4	2		AT3G11550	0	0	BnaA03g31780D	-1.78864	-2.25721	-0.0200681	-1.35447	-2.03429	-2.13966	0.000127831	3.86439e-06	1	0.00579922	3.52675e-05	0.725771	BnaA03g31780D	-6.79359	3.56705e-26	-7.9773	1.1e-09	-6.55007	1.04e-16
BnaC08g12560D	GSBRNA2T00104504001	3522		AT4G27595.2		WEB family protein (DUF827)	Chr4:13772126-13777437 REVERSE LENGTH=4935	4935	0	AT4G27595					AT4G27595	0	0	BnaC08g12560D	-2.44621	-1.26	-0.280659	-1.95589	-1.10669	-0.362825	2.36989e-14	0.000231322	0.707824	1.36491e-09	0.00120906	0.630973	BnaC08g12560D	-1.97958	3.99352e-26	-2.12398	2.82e-24	-1.78561	1.23e-46
BnaCnng38050D	GSBRNA2T00034024001	843	hypoxia-responsive	AT3G23730.1	XTH16	xyloglucan endotransglucosylase/hydrolase 16	Chr3:8550037-8551403 FORWARD LENGTH=1216	1216	0	AT3G23730	257203_at	2	15		AT3G23730	0	0	BnaCnng38050D	-4.9334	-3.70984	0.797711	-3.6727	-2.9984	-1.1617	9.56984e-21	7.97299e-13	0.345546	4.28807e-13	4.37005e-09	0.135792	BnaCnng38050D	-1.59032	1.40727e-16	-1.71609	1.19e-32	-1.38814	2.2e-34
BnaAnng19040D	GSBRNA2T00039598001	579	hypoxia-responsive	AT3G23730.1	XTH16	xyloglucan endotransglucosylase/hydrolase 16	Chr3:8550037-8551403 FORWARD LENGTH=1216	1216	0	AT3G23730	257203_at	2	15		AT3G23730	0	0	BnaAnng19040D	-5.03117	-3.46372	0.452691	-3.76226	-2.93365	-0.0155528	2.00215e-16	8.30676e-09	0.72713	2.73429e-11	4.11239e-07	1	BnaAnng19040D	-1.05768	2.43286e-07	-1.46925	1.21e-14	-1.19097	3.6e-17
BnaAnng03530D	GSBRNA2T00043543001	879	hypoxia-responsive	AT3G44990.1	XTH31	xyloglucan endo-transglycosylase-related 8	Chr3:16446935-16448844 REVERSE LENGTH=1393	1393	0	AT3G44990	252607_at	0	36		AT3G44990	0	3	BnaAnng03530D	-3.38346	-1.24666	0.01449	-2.36572	-1.34816	-0.103643	3.04436e-15	0.00653571	1	2.18635e-08	0.00243414	1	BnaAnng03530D	-6.27413	1.27641e-25	-3.38327	2.81e-05	-3.88754	3.48e-17
BnaA06g18630D	GSBRNA2T00107344001	879	hypoxia-responsive	AT3G44990.1	XTH31	xyloglucan endo-transglycosylase-related 8	Chr3:16446935-16448844 REVERSE LENGTH=1393	1393	0	AT3G44990	252607_at	0	36		AT3G44990	0	3	BnaA06g18630D	-3.39796	-2.90713	-0.372299	-2.51824	-2.87253	0.645812	1.00276e-11	1.19726e-08	0.759475	3.73937e-07	1.50658e-08	0.542655	BnaA06g18630D	-2.24705	1.73301e-14	-1.30538	0.000666506	-1.33145	9.54e-72
BnaC03g55190D	GSBRNA2T00047062001	879	hypoxia-responsive	AT3G44990.1	XTH31	xyloglucan endo-transglycosylase-related 8	Chr3:16446935-16448844 REVERSE LENGTH=1393	1393	0	AT3G44990	252607_at	0	36		AT3G44990	0	3	BnaC03g55190D	-3.85286	-2.53499	-0.384068	-2.79686	-3.00011	0.456763	3.38754e-17	2.83544e-08	0.719509	4.1124e-10	5.13077e-11	0.687743	BnaC03g55190D	-1.49135	4.12628e-05	-1.32748	1.71e-06	-1.36591	5.76e-22
BnaC08g29770D	GSBRNA2T00155637001	2037		AT3G59570.1		Ypt/Rab-GAP domain of gyp1p superfamily protein	Chr3:22000831-22006132 REVERSE LENGTH=2708	2708	0	AT3G59570	251470_at	0	0		AT3G59570	0	0	BnaC08g29770D	-2.35707	-1.41674	0.190348	-1.78475	-1.49603	-0.0361535	5.6394e-08	0.00204809	0.927803	5.53716e-05	0.000895887	1	BnaC08g29770D	-1.83004	4.49208e-10	-1.74625	8.92e-09	-1.23714	1.07e-11
BnaC05g24480D	GSBRNA2T00111467001	1068		AT1G32360.1		Zinc finger (CCCH-type) family protein	Chr1:11672766-11675387 FORWARD LENGTH=1939	1939	0	AT1G32360	260652_at	0	0		AT1G32360	0	0	BnaC05g24480D	-2.06314	-1.01838	0.262437	-2.50116	-1.60685	0.249783	2.98215e-14	0.000733796	0.680347	1.63232e-19	2.87227e-08	0.734731	BnaC05g24480D	-1.56157	3.3178e-07	-1.25816	1.4e-05	-1.33884	1.66e-11
BnaA09g24410D	GSBRNA2T00156629001	903		AT1G32360.1		Zinc finger (CCCH-type) family protein	Chr1:11672766-11675387 FORWARD LENGTH=1939	1939	1e-146	AT1G32360	260652_at	0	0		AT1G32360	0	0	BnaA09g24410D	-2.52999	-1.42974	0.0251313	-2.49519	-1.74502	-0.0517289	6.95279e-17	9.07402e-06	1	2.44938e-16	3.74634e-08	1	BnaA09g24410D	-1.97634	2.3365e-13	-1.01107	0.00178336	-1.3029	6.64e-11
