# Supplementary material for: Transcriptional Response of Two Brassica napus Cultivars to Short-Term Hypoxia in the Root Zone
Source: Front Plant Sci. 2022 Apr 29;13:897673. doi: 10.3389/fpls.2022.897673 (PMC9100894; doi:10.3389/fpls.2022.897673)
Supplement: Supplementary file 9 [file Data_Sheet_9.XLSX]

## Sheet: TableS8A
Table S8A: Comparison to Zou et al. 2015
ID	ID	QueryLength	HitAcc	symbol	description	ID	logFC Root_H4h_AV	logFC Root_H24h_AV	logFC Leaf_H24h_AV	logFC Root_H4h_ZS	logFC Root_H24h_ZS	logFC Leaf_H24h_ZS	FDR Root_H4h_AV	FDR Root_H24h_AV	FDR Leaf_H24h_AV	FDR Root_H4h_ZS	FDR Root_H24h_ZS	FDR Leaf_H24h_ZS	ID	logFC Root_K4h_GT	logFC Root_K24h_GT	logFC Leaf_K24h_GT	logFC Root_H4h_GT	logFC Root_H24h_GT	logFC Leaf_H24h_GT	FDR Root_K4h_GT	FDR Root_K24h_GT	FDR Leaf_K24h_GT	FDR Root_H4h_GT	FDR Root_H24h_GT	FDR Leaf_H24h_GT		logFC Root_4h_GT	logFC Root_24h_GT	logFC Leaf_24h_GT	FDR Root_4h_GT	FDR Root_24h_GT	FDR Leaf_24h_GT	GeneID	ZS9_0h RPKM	ZS9_12h RPKM	log2 Ratio 12h 0h	P value	FDR	GeneID	GH01_0h RPKM	GH01_12h RPKM	log2 Ratio 12h 0h	P value
Bra038700	more induced in Zhongshuang																																						Bra038700	61.2831	199.141	1.70023	0	0	Bra038700	49.8018	21.1658	-1.23446	1.97343e-25
BnaA01g30830D	GSBRNA2T00097000001	978	AT3G12145.1	FLR1	Leucine-rich repeat (LRR) family protein	BnaA01g30830D	0.378819	-0.282163	0.672428	0.163647	-0.240999	0.5026	0.638466	0.789375	0.645005	0.881959	0.814595	0.784261	BnaA01g30830D	-1.61853	-1.31138	-1.35136	-1.40336	-1.35254	-1.18154	0.0327204	0.112017	0.107288	0.0651015	0.0829372	0.147002	BnaA01g30830D	0.215172	-0.0411642	0.169827	1	1	1
BnaA05g26870D	GSBRNA2T00000217001	981	AT3G12145.1	FLR1	Leucine-rich repeat (LRR) family protein	BnaA05g26870D	-0.0488509	-0.251722	3.67202	-0.961399	-2.2677	-0.277216	0.990422	0.91813	0.00363653	0.351379	0.0405913	0.956852	BnaA05g26870D	-3.79212	-3.45435	-5.28148	-2.87957	-1.43837	-1.33224	0.000181432	0.00263283	1.75178e-07	0.00772651	0.407383	0.216489	BnaA05g26870D	0.912548	2.01598	3.94924	1	1	0.107345
BnaCnng23020D	GSBRNA2T00007408001	978	AT3G12145.1	FLR1	Leucine-rich repeat (LRR) family protein	BnaCnng23020D	-0.509564	-4.03038	-1.064	-0.17798	-7.57199	-6.31305	0.869019	0.164002	0.900818	0.982921	0.0185881	0.245526	BnaCnng23020D	6.35856	3.44869	3.13824	6.02698	6.9903	8.38729	0.0434201	0.3608	0.378569	0.0564102	0.0272499	0.0209075	BnaCnng23020D	-0.331583	3.54161	5.24905	1	1	0.706781
BnaC05g40920D	GSBRNA2T00074305001	981	AT3G12145.1	FLR1	Leucine-rich repeat (LRR) family protein	BnaC05g40920D	-2.2831	-0.82776	0.925801	-1.92012	-1.76591	-0.0977601	4.91609e-09	0.0673394	0.107057	1.39337e-06	1.67657e-05	0.988489	BnaC05g40920D	0.304613	0.026418	0.863683	-0.0583723	0.964569	1.88724	0.684523	0.991363	0.0693347	0.953558	0.0316016	2.38399e-06	BnaC05g40920D	-0.362986	0.938151	1.02356	1	0.893678	0.541508
Bra021558	more induced in Zhongshuang																																						Bra021558	10.2441	31.6446	1.62717	0	0
BnaA05g25030D	GSBRNA2T00104791001	1794	AT3G14440.1	NCED3	nine-cis-epoxycarotenoid dioxygenase 3	BnaA05g25030D	-0.557598	0.9601	0.441317	-1.03751	-0.971817	0.452579	0.505593	0.26804	0.821331	0.261492	0.302937	0.870407	BnaA05g25030D	1.05296	0.826199	2.55327	1.53287	2.75812	2.542	0.29909	0.458739	0.00179812	0.0969929	0.00039485	0.0015539	BnaA05g25030D	0.479909	1.93192	-0.0112615	1	0.762177	1
BnaC05g39200D	GSBRNA2T00106070001	1794	AT3G14440.1	NCED3	nine-cis-epoxycarotenoid dioxygenase 3	BnaC05g39200D	-1.64166	-0.748445	-0.394006	-0.890224	-0.76146	0.326648	0.0360212	0.324233	0.820843	0.230688	0.304086	0.882125	BnaC05g39200D	-1.31022	-0.00402876	0.389107	-2.06166	0.00898686	-0.331546	0.0917103	1	0.735506	0.0123802	1	0.771407	BnaC05g39200D	-0.751433	0.0130156	-0.720653	1	1	0.932066
BnaA01g29390D	GSBRNA2T00067283001	1662	AT3G14440.1	NCED3	nine-cis-epoxycarotenoid dioxygenase 3	BnaA01g29390D	-4.34934	-2.07949	1.23755	-3.43355	-2.24058	0.125511	0.000157365	0.0698404	0.547209	0.00549206	0.052971	1	BnaA01g29390D	1.00638	1.91175	0.0418275	0.0905913	2.07284	1.15387	0.538456	0.122546	1	0.985639	0.0929629	0.418743	BnaA01g29390D	-0.915789	0.161086	1.11204	1	1	0.940176
BnaC01g36910D	GSBRNA2T00053960001	1797	AT3G14440.1	NCED3	nine-cis-epoxycarotenoid dioxygenase 3	BnaC01g36910D	-4.4101	-2.32378	0.016181	-3.67526	-3.46057	0.249697	6.45102e-06	0.0126977	1	0.000179044	0.000211793	0.9692	BnaC01g36910D	0.199102	0.247069	0.326431	-0.535739	1.38386	0.0929146	0.937968	0.897326	0.859563	0.778406	0.203696	0.993715	BnaC01g36910D	-0.734842	1.13679	-0.233516	1	1	1
BnaA01g09900D	GSBRNA2T00131415001	1791	AT4G19170.1	NCED4	nine-cis-epoxycarotenoid dioxygenase 4	BnaA01g09900D	-0.175129	-0.12953	0.132008	-0.333528	-0.680523	0.600561	0.727507	0.850911	0.925721	0.547092	0.1681	0.323059	BnaA01g09900D	0.469858	-0.131477	-0.0189734	0.628257	0.419515	-0.487526	0.453365	0.888008	1	0.241772	0.505653	0.261733	BnaA01g09900D	0.158399	0.550993	-0.468553	1	1	0.887848
BnaC01g11550D	GSBRNA2T00107720001	1782	AT4G19170.1	NCED4	nine-cis-epoxycarotenoid dioxygenase 4	BnaC01g11550D	-0.332384	-0.359279	0.25764	-0.798832	-0.771782	0.480891	0.618653	0.659111	0.776227	0.193128	0.200825	0.523507	BnaC01g11550D	-0.57018	-0.84753	-0.236	-0.103732	-0.435028	-0.459251	0.476066	0.1998	0.713098	0.939531	0.628382	0.337906	BnaC01g11550D	0.466448	0.412502	-0.223251	1	1	1
BnaC06g38870D	GSBRNA2T00147987001	1809	AT1G78390.1	NCED9	nine-cis-epoxycarotenoid dioxygenase 9	BnaC06g38870D	-1.08142	-0.794205	1.04374	-1.91145	-2.49814	-1.21251	0.155095	0.497732	0.534394	0.00508389	0.000409187	0.691018	BnaC06g38870D	-2.95059	-4.51857	0.668697	-2.12055	-2.81464	2.92494	1.65257e-05	1.0901e-09	0.687819	0.00481468	0.000673978	0.0120822	BnaC06g38870D	0.830034	1.70394	2.25625	1	0.99736	0.687057
Bra003701	more induced in Zhongshuang																																						Bra003701	17.0369	42.4361	1.31663	1.90958e-13	8.00456e-13
BnaC05g38410D	GSBRNA2T00106179001	591	AT3G15210.1	ERF4	ethylene responsive element binding factor 4	BnaC05g38410D	3.32719	1.7133	1.01765	3.5182	2.05525	0.771245	4.03869e-21	2.6924e-06	0.0447298	7.33179e-23	9.18496e-09	0.227333	BnaC05g38410D	0.228621	-0.120576	0.1889	0.0376137	-0.462521	0.435301	0.761325	0.884813	0.810025	0.969545	0.325853	0.397395	BnaC05g38410D	-0.191007	-0.341945	0.246401	1	1	1
BnaA05g24390D	GSBRNA2T00104869001	570	AT3G15210.1	ERF4	ethylene responsive element binding factor 4	BnaA05g24390D	2.00569	1.06513	0.908185	1.46	1.21654	0.622967	4.66254e-11	0.00152983	0.051224	2.54235e-06	0.000168932	0.336501	BnaA05g24390D	-0.763921	-0.551819	0.379037	-0.218237	-0.703231	0.664255	0.0338651	0.186869	0.486318	0.658452	0.0484041	0.100445	BnaA05g24390D	0.545684	-0.151412	0.285218	0.979053	1	0.986416	Bra027270	23.2223	199.848	3.10532	0	0	Bra027270	35.109	84.2703	1.26318	2.62012e-13
BnaA03g33790D	GSBRNA2T00137580001	615	AT3G15210.1	ERF4	ethylene responsive element binding factor 4	BnaA03g33790D	1.86612	0.70329	0.192528	1.06157	0.721248	0.20952	1.45613e-09	0.0500528	0.843919	0.000965632	0.0378362	0.837855	BnaA03g33790D	-0.882242	-0.423169	-0.137521	-0.0776954	-0.441128	-0.154513	0.0109132	0.3608	0.85136	0.907422	0.288219	0.80776	BnaA03g33790D	0.804547	-0.0179589	-0.0169915	0.69064	1	1	Bra001588	109.854	22.3011	-2.3004	1.20697e-78	1.44677e-77
BnaC03g39000D	GSBRNA2T00123774001	615	AT3G15210.1	ERF4	ethylene responsive element binding factor 4	BnaC03g39000D	1.40586	0.288124	0.92486	1.04015	0.58255	0.417549	7.38272e-05	0.565237	0.0790857	0.00525678	0.164782	0.649288	BnaC03g39000D	-0.0487749	-0.0340905	1.03543	0.316944	-0.328517	1.54274	0.97194	0.981038	0.0160154	0.549692	0.538124	5.80033e-05	BnaC03g39000D	0.365719	-0.294426	0.50731	1	1	0.901871
BnaA01g28970D	GSBRNA2T00009958001	630	AT3G15210.1	ERF4	ethylene responsive element binding factor 4	BnaA01g28970D	0.633035	0.221825	1.15912	-0.412223	-0.100528	-0.555418	0.258132	0.782952	0.135769	0.538083	0.919533	0.706008	BnaA01g28970D	0.999458	1.41256	1.22514	2.04472	1.73491	2.93968	0.116618	0.0148081	0.0566186	0.000124484	0.00136648	1.55211e-07	BnaA01g28970D	1.04526	0.322353	1.71453	0.89704	1	0.363686	Bra021594	21.6054	45.0036	1.05865	6.12844e-13	2.36666e-12
BnaC03g69420D	GSBRNA2T00033098001	417	AT3G15210.1	ERF4	ethylene responsive element binding factor 4	BnaC03g69420D	-1.33515	-0.236299	-0.214253	-0.592454	0.396195	-0.387266	0.00924702	0.745603	0.899197	0.305869	0.531134	0.77036	BnaC03g69420D	-0.24067	0.519663	0.626059	-0.983368	-0.112831	0.799071	0.826867	0.493344	0.347869	0.112088	0.911644	0.189434	BnaC03g69420D	-0.742698	-0.632494	0.173013	1	1	1
BnaC01g36330D	GSBRNA2T00051811001	657	AT3G15210.1	ERF4	ethylene responsive element binding factor 4	BnaC01g36330D	-2.5083	1.86033	0.393699	-0.16797	-6.52387	-7.20724	0.718724	0.782815	1	1	0.139956	0.386264	BnaC01g36330D	5.75754	0.476174	-0.24431	3.41721	8.86037	7.35663	0.202023	0.940663	1	0.338343	0.0798449	0.182677	BnaC01g36330D	-2.34033	8.3842	7.60094	1	0.868825	0.704214
Bra014080	more induced in Zhongshuang																																						Bra014080	52.5506	128.271	1.28742	4.30544e-13	1.70472e-12	Bra014080	24.9231	10.8294	-1.20253	1.35238e-12
BnaA08g03780D	GSBRNA2T00094970001	945	AT1G47480.1		alpha/beta-Hydrolases superfamily protein	BnaA08g03780D	-0.789254	-1.02902	0.269818	-0.721063	-1.40264	-1.41749	0.203741	0.129463	0.937776	0.282858	0.0254062	0.275012	BnaA08g03780D	0.0807336	-0.201702	-1.26969	0.0125427	0.171923	0.417617	0.970083	0.875525	0.154534	1	0.878598	0.770498	BnaA08g03780D	-0.068191	0.373625	1.6873	1	1	0.649967
BnaC08g46740D	GSBRNA2T00087775001	945	AT1G47480.1		alpha/beta-Hydrolases superfamily protein	BnaC08g46740D	-0.857837	-1.15121	-0.297563	-0.741211	-0.569369	-0.382832	0.006317	0.000482982	0.771159	0.0396391	0.141521	0.822974	BnaC08g46740D	1.53484	1.78669	1.53246	1.41822	1.20485	1.61773	1.09901e-06	8.97434e-09	0.00108992	1.78956e-05	0.000372507	0.00226751	BnaC08g46740D	-0.116627	-0.581843	0.0852692	1	1	1
Bra007609	more induced in Zhongshuang																																						Bra007609	139.854	318.981	1.18955	9.35518e-12	3.2157e-11	Bra007609	144.681	66.4179	-1.12323	1.4036e-87
BnaC08g49000D	GSBRNA2T00045683001	1419	AT3G61490.3		Pectin lyase-like superfamily protein	BnaC08g49000D	-0.428706	0.256186	-0.053987	-0.808594	-0.257917	0.359664	0.424766	0.716362	1	0.120049	0.70137	0.782021	BnaC08g49000D	-0.475188	-0.291313	0.126417	-0.0952997	0.22279	-0.287234	0.546079	0.749153	0.926594	0.927359	0.787267	0.722941	BnaC08g49000D	0.379889	0.514103	-0.413651	1	1	0.97696
BnaA09g39240D	GSBRNA2T00091999001	1416	AT3G61490.3		Pectin lyase-like superfamily protein	BnaA09g39240D	-0.930999	0.250881	-0.511497	-1.6388	-0.628297	0.190995	0.0804341	0.747827	0.638537	0.00180908	0.3143	0.944762	BnaA09g39240D	-0.205251	-0.0811155	0.558609	0.502547	0.798063	-0.143884	0.87341	0.9566	0.472668	0.49046	0.217489	0.912557	BnaA09g39240D	0.707797	0.879178	-0.702493	1	1	0.890979
Bra016729	induced in both genotypes																																						Bra016729	612.612	2539.02	2.05123	0	0	Bra016729	824.238	3060.79	1.89277	0
BnaC08g40330D	GSBRNA2T00090500001	1293	AT3G04120.1	GAPC1	glyceraldehyde-3-phosphate dehydrogenase C subunit 1	BnaC08g40330D	2.12208	1.17265	0.41318	2.12029	0.543263	0.360986	1.93457e-08	0.00491303	0.616495	3.60522e-08	0.240194	0.716385	BnaC08g40330D	0.104882	-0.0860594	-0.126391	0.106666	0.543323	-0.0741972	0.92778	0.93257	0.898013	0.891524	0.2786	0.957451	BnaC08g40330D	0.00178488	0.629383	0.0521934	1	1	1
BnaA08g24270D	GSBRNA2T00015275001	1122	AT3G04120.1	GAPC1	glyceraldehyde-3-phosphate dehydrogenase C subunit 1	BnaA08g24270D	1.52667	0.823711	-1.25456	1.51656	1.53345	-0.110699	0.00429236	0.19904	0.111187	0.00599152	0.00731833	0.999408	BnaA08g24270D	-1.05655	-0.408657	-0.668923	-1.04644	-1.1184	-1.81279	0.103974	0.667973	0.387654	0.0930606	0.0693145	0.00126043	BnaA08g24270D	0.0101097	-0.709739	-1.14386	1	1	0.684726
BnaC08g15900D	GSBRNA2T00096086001	1119	AT3G04120.1	GAPC1	glyceraldehyde-3-phosphate dehydrogenase C subunit 1	BnaC08g15900D	1.44407	1.58858	-0.00564633	1.79054	1.91966	0.0202258	0.000101192	5.67193e-05	1	1.98304e-06	6.08668e-07	1	BnaC08g15900D	0.00446336	-0.120473	-0.126293	-0.342013	-0.451551	-0.152165	1	0.891352	0.894343	0.533565	0.381831	0.847168	BnaC08g15900D	-0.346476	-0.331077	-0.0258722	1	1	1
BnaA01g33660D	GSBRNA2T00015321001	1026	AT3G04120.1	GAPC1	glyceraldehyde-3-phosphate dehydrogenase C subunit 1	BnaA01g33660D	-0.571829	-0.273395	-0.100464	-0.0776971	0.465676	0.751189	0.279023	0.700301	0.991062	0.936586	0.44461	0.42713	BnaA01g33660D	0.026984	-0.0792372	0.39293	-0.467148	-0.818309	-0.458723	0.995598	0.955177	0.621979	0.494823	0.163755	0.518103	BnaA01g33660D	-0.494132	-0.739072	-0.851653	1	1	0.797536
BnaA03g28480D	GSBRNA2T00111966001	1059	AT3G04120.1	GAPC1	glyceraldehyde-3-phosphate dehydrogenase C subunit 1	BnaA03g28480D	-0.770096	-1.20404	-0.224861	-1.9521	-1.753	0.961373	0.310517	0.139108	0.956194	0.0192962	0.0442767	0.834692	BnaA03g28480D	4.09085	4.3299	5.66298	5.27286	4.87886	4.47674	4.12563e-08	8.93287e-09	2.82681e-08	4.83922e-11	8.26484e-10	6.80599e-06	BnaA03g28480D	1.18201	0.548959	-1.18623	1	1	0.954249
BnaA05g33200D	GSBRNA2T00092896001	1011	AT3G04120.1	GAPC1	glyceraldehyde-3-phosphate dehydrogenase C subunit 1	BnaA05g33200D	-1.0439	-1.09591	0.485931	-0.844636	-0.68743	-1.73256	0.00023717	0.000320283	0.34996	0.00876438	0.0616358	0.0333459	BnaA05g33200D	4.36236	4.08849	3.9426	4.1631	3.68001	6.16109	6.941e-48	8.10078e-42	5.72912e-31	3.44443e-43	3.14576e-33	3.70718e-49	BnaA05g33200D	-0.199264	-0.408481	2.21849	1	1	0.0543698
BnaC05g47450D	GSBRNA2T00075637001	1062	AT3G04120.1	GAPC1	glyceraldehyde-3-phosphate dehydrogenase C subunit 1	BnaC05g47450D	-1.70918	-1.0892	0.244164	-1.07178	-0.797898	-0.222246	2.96897e-08	0.00125667	0.759975	0.000854633	0.0205148	0.815456	BnaC05g47450D	0.0976761	-0.00209381	-0.798473	-0.539722	-0.293399	-0.332063	0.91332	1	0.0305572	0.16353	0.532715	0.474922	BnaC05g47450D	-0.637398	-0.291305	0.46641	0.902865	1	0.876201
BnaC03g33610D	GSBRNA2T00153727001	1047	AT3G04120.1	GAPC1	glyceraldehyde-3-phosphate dehydrogenase C subunit 1	BnaC03g33610D	-1.82847	-1.47503	-0.290165	-1.1924	-1.09358	0.00821205	1.09092e-08	1.35452e-05	0.713539	0.000354252	0.00158754	1	BnaC03g33610D	1.09004	0.908971	0.575333	0.45397	0.527514	0.276956	0.00149349	0.0128792	0.19525	0.293021	0.206806	0.608815	BnaC03g33610D	-0.63607	-0.381457	-0.298377	0.922516	1	0.978509
BnaC01g40210D	GSBRNA2T00044509001	1131	AT3G04120.1	GAPC1	glyceraldehyde-3-phosphate dehydrogenase C subunit 1	BnaC01g40210D	-3.02993	-4.88241	0.128884	-0.286548	-4.19267	-7.284	0.137097	0.0375598	1	0.932121	0.0701583	0.0207332	BnaC01g40210D	-0.208791	-1.55982	-7.42596	-2.95217	-2.24957	-0.013073	0.975912	0.575419	0.00562853	0.232616	0.353282	1	BnaC01g40210D	-2.74338	-0.689744	7.41288	1	1	0.489056
BnaC05g09880D	GSBRNA2T00044567001	1182	AT1G13440.1	GAPC2	glyceraldehyde-3-phosphate dehydrogenase C2	BnaC05g09880D	2.57192	2.37335	-0.35359	2.97475	2.89174	-0.00976551	1.73976e-11	2.14831e-09	0.680437	1.89166e-14	1.94106e-13	1	BnaC05g09880D	0.104363	-0.0354308	-0.0195625	-0.29846	-0.553821	-0.363387	0.927403	0.981789	1	0.613794	0.269095	0.528295	BnaC05g09880D	-0.402824	-0.51839	-0.343824	1	1	0.975108	Bra019722	998.818	3646.78	1.86833	3.18518e-11	1.06762e-10	Bra019722	1426.55	5538.31	1.95691	0
BnaA06g08510D	GSBRNA2T00105484001	957	AT1G13440.1	GAPC2	glyceraldehyde-3-phosphate dehydrogenase C2	BnaA06g08510D	2.0102	2.61498	-0.210217	2.17321	2.13657	-0.872798	0.000196283	5.27933e-06	0.926838	8.39716e-05	0.000190009	0.402191	BnaA06g08510D	1.88073	1.26849	0.969189	1.71772	1.7469	1.63177	0.000967858	0.0472613	0.161799	0.00264185	0.00224665	0.00508375	BnaA06g08510D	-0.163016	0.478411	0.662581	1	1	0.920071
BnaA09g46260D	GSBRNA2T00035531001	1002	AT1G13440.1	GAPC2	glyceraldehyde-3-phosphate dehydrogenase C2	BnaA09g46260D	1.6138	1.03751	0.617534	1.84762	1.6225	0.328215	1.21796e-05	0.0121137	0.354787	8.3009e-07	2.9784e-05	0.740162	BnaA09g46260D	0.0381951	0.0783783	-0.520949	-0.195618	-0.50662	-0.231631	0.982168	0.938107	0.3338	0.760055	0.309515	0.726809	BnaA09g46260D	-0.233813	-0.584998	0.289319	1	1	0.995592
Bra022115	more induced in Zhongshuang																																						Bra022115	54.475	114.77	1.07508	1.33893e-13	5.72753e-13
BnaA02g25110D	GSBRNA2T00041679001	693	AT5G47220.1	ERF2	ethylene responsive element binding factor 2	BnaA02g25110D	3.6849	1.41176	-0.360488	2.62266	1.56434	0.327116	1.57577e-14	0.00594875	0.751928	5.57247e-08	0.00216971	0.823239	BnaA02g25110D	0.830268	1.362	2.25927	1.8925	1.20942	1.57166	0.189991	0.0115478	3.11164e-06	6.53667e-05	0.0203798	0.00174884	BnaA02g25110D	1.06223	-0.15258	-0.687604	0.819463	1	0.877459
BnaCnng60520D	GSBRNA2T00079836001	678	AT5G47220.1	ERF2	ethylene responsive element binding factor 2	BnaCnng60520D	3.06153	1.4361	-0.306442	1.72939	1.72221	0.0984968	6.98184e-15	0.000637712	0.749188	1.15145e-05	2.61556e-05	0.98704	BnaCnng60520D	-0.716495	0.501759	0.913429	0.615647	0.215652	0.508491	0.156098	0.405383	0.0485344	0.205937	0.747553	0.34022	BnaCnng60520D	1.33214	-0.286108	-0.404939	0.315755	1	0.952564
BnaA06g35500D	GSBRNA2T00054775001	651	AT5G47220.1	ERF2	ethylene responsive element binding factor 2	BnaA06g35500D	2.44489	0.913719	0.27899	-0.460786	0.217494	0.374772	0.000939173	0.315691	0.924916	0.629431	0.851529	0.888386	BnaA06g35500D	-0.862161	-0.962528	0.876129	2.04352	-0.266303	0.780347	0.44159	0.359449	0.406298	0.0088496	0.840613	0.445681	BnaA06g35500D	2.90568	0.696225	-0.0957818	0.133021	1	1	Bra024954	29.4527	61.9663	1.07309	8.4155e-14	3.68429e-13
BnaC07g20040D	GSBRNA2T00128779001	669	AT5G47220.1	ERF2	ethylene responsive element binding factor 2	BnaC07g20040D	2.25483	0.289677	-0.29949	0.768046	0.962337	0.470401	0.000778763	0.78352	0.905042	0.324679	0.225153	0.830571	BnaC07g20040D	-0.762726	0.020471	1.49937	0.724061	-0.65219	0.729481	0.467367	1	0.0739021	0.424871	0.502584	0.468691	BnaC07g20040D	1.48679	-0.672661	-0.769891	0.808228	1	0.940176
BnaAnng07060D	GSBRNA2T00076656001	687	AT5G47220.1	ERF2	ethylene responsive element binding factor 2	BnaAnng07060D	0.585858	-1.10157	0.152842	1.00958	0.200263	1.8337	0.457331	0.17545	0.989768	0.182597	0.85642	0.144869	BnaAnng07060D	-0.496706	0.569701	1.74998	-0.920424	-0.732132	0.069126	0.7083	0.619028	0.0621029	0.285845	0.450797	1	BnaAnng07060D	-0.423718	-1.30183	-1.68086	1	1	0.660167
BnaC09g20090D	GSBRNA2T00033505001	723	AT5G47220.1	ERF2	ethylene responsive element binding factor 2	BnaC09g20090D	0.36423	-0.244313	0.463707	1.07796	-0.0527133	-0.844405	0.560647	0.757591	0.740204	0.0502277	0.96751	0.559956	BnaC09g20090D	-0.631728	-0.107965	0.292587	-1.34546	-0.299565	1.6007	0.429239	0.936558	0.813007	0.0165023	0.724744	0.0233518	BnaC09g20090D	-0.713731	-0.1916	1.30811	1	1	0.69561
Bra004778	induced in both genotypes																																						Bra004778	106.849	1823.79	4.09329	4.51394e-12	1.59117e-11	Bra004778	92.4125	1117.9	3.59656	7.24754e-13
BnaA03g20420D	GSBRNA2T00139042001	1197	AT2G43710.1	SSI2	Plant stearoyl-acyl-carrier-protein desaturase family protein	BnaA03g20420D	7.38547	6.64975	-0.342038	7.37246	6.87221	-0.237581	8.06453e-47	5.44784e-40	0.744402	1.6187e-46	7.40949e-42	0.87309	BnaA03g20420D	0.562347	0.594388	0.375847	0.575359	0.371929	0.27139	0.394802	0.350186	0.5913	0.30918	0.566035	0.714089	BnaA03g20420D	0.0130117	-0.222459	-0.104457	1	1	1	Bra000321	33.1183	3563.32	6.74945	9.31478e-13	3.51179e-12	Bra000321	31.2457	2451.19	6.29368	6.47926e-13
BnaC03g24420D	GSBRNA2T00079758001	1200	AT2G43710.1	SSI2	Plant stearoyl-acyl-carrier-protein desaturase family protein	BnaC03g24420D	6.6996	5.86539	-0.330786	6.93187	6.09672	-0.0645663	2.57168e-42	2.08869e-34	0.751796	2.71263e-44	1.2739e-36	1	BnaC03g24420D	-0.417641	-0.530935	-0.291667	-0.649905	-0.762257	-0.557887	0.574924	0.415923	0.700593	0.225278	0.140573	0.332332	BnaC03g24420D	-0.232264	-0.231322	-0.266219	1	1	1
BnaC04g03030D	GSBRNA2T00002263001	1200	AT2G43710.1	SSI2	Plant stearoyl-acyl-carrier-protein desaturase family protein	BnaC04g03030D	4.11548	3.61648	-0.146535	4.62909	3.65462	-0.00533502	5.41858e-11	2.71879e-08	0.978655	6.78251e-13	1.27077e-08	1	BnaC04g03030D	-0.106517	-0.283881	-0.100358	-0.620124	-0.322015	-0.241558	0.95802	0.820554	0.972034	0.454749	0.748599	0.84373	BnaC04g03030D	-0.513607	-0.0381346	-0.1412	1	1	1
BnaA05g03490D	GSBRNA2T00132639001	1206	AT2G43710.1	SSI2	Plant stearoyl-acyl-carrier-protein desaturase family protein	BnaA05g03490D	3.90115	3.61031	0.458292	3.86614	3.23017	0.177412	2.27966e-15	7.545e-13	0.653654	4.97562e-15	7.17476e-11	0.944686	BnaA05g03490D	-0.960604	-1.0583	-1.0612	-0.925594	-0.678164	-0.780317	0.0986781	0.0677662	0.0599854	0.095418	0.268805	0.188566	BnaA05g03490D	0.0350104	0.380139	0.28088	1	1	1
Bra012551	more reduced in Zhongshuang																																						Bra012551	43.7864	14.6856	-1.57608	5.98066e-43	4.89442e-42	Bra012551	43.4141	91.2784	1.07211	0
BnaC01g11650D	GSBRNA2T00107705001	1494	AT4G19230.1	CYP707A1	cytochrome P450, family 707, subfamily A, polypeptide 1	BnaC01g11650D	0.721493	-0.251791	-0.451188	1.09652	-0.445029	0.128722	0.0503921	0.61267	0.678822	0.00288984	0.299399	0.976628	BnaC01g11650D	0.209945	0.0980149	-0.311712	-0.165081	0.291253	-0.891622	0.788394	0.908786	0.703887	0.792283	0.586377	0.125745	BnaC01g11650D	-0.375026	0.193238	-0.579909	1	1	0.920543
BnaA03g43960D	GSBRNA2T00106651001	1404	AT4G19230.1	CYP707A1	cytochrome P450, family 707, subfamily A, polypeptide 1	BnaA03g43960D	-0.134518	-0.977721	0.54219	-0.282185	-0.587495	-0.174441	0.801628	0.0294854	0.659624	0.592541	0.215794	0.983924	BnaA03g43960D	0.275252	-0.328374	0.431947	0.422919	-0.7186	1.14858	0.734827	0.639524	0.68641	0.454442	0.142964	0.126918	BnaA03g43960D	0.147667	-0.390226	0.716631	1	1	0.932514
BnaC07g35800D	GSBRNA2T00112637001	1404	AT4G19230.1	CYP707A1	cytochrome P450, family 707, subfamily A, polypeptide 1	BnaC07g35800D	-0.259761	-0.0978524	1.62739	-0.721919	-1.31384	-1.84558	0.633001	0.905131	0.11742	0.164729	0.00701183	0.205796	BnaC07g35800D	1.67387	1.26865	-1.00211	2.13603	2.48464	2.47086	0.000314185	0.0104337	0.344322	2.9824e-06	4.44622e-08	0.00498632	BnaC07g35800D	0.462158	1.21599	3.47297	1	0.731303	0.0969804
BnaAnng27240D	GSBRNA2T00074212001	1494	AT4G19230.1	CYP707A1	cytochrome P450, family 707, subfamily A, polypeptide 1	BnaAnng27240D	-0.391946	-0.76701	0.368415	-0.464313	-1.10185	-0.463842	0.363203	0.0769031	0.87786	0.301359	0.00625258	0.839629	BnaAnng27240D	-0.265958	-0.213658	-0.494996	-0.193592	0.121187	0.337261	0.727095	0.77843	0.688305	0.767815	0.868426	0.820527	BnaAnng27240D	0.0723667	0.334845	0.832257	1	1	0.93371
BnaC04g40260D	GSBRNA2T00127902001	1449	AT2G29090.2	CYP707A2	cytochrome P450, family 707, subfamily A, polypeptide 2	BnaC04g40260D	-0.463594	2.46091	1.14816	-1.62932	0.00712733	0.73663	0.844856	0.239836	0.241844	0.432146	1	0.59239	BnaC04g40260D	-0.184011	0.00546117	0.0554063	0.98171	2.45924	0.466939	0.975622	1	1	0.674437	0.3165	0.633021	BnaC04g40260D	1.16572	2.45378	0.411533	1	1	1
BnaA04g16900D	GSBRNA2T00050400001	1449	AT2G29090.2	CYP707A2	cytochrome P450, family 707, subfamily A, polypeptide 2	BnaA04g16900D	-0.981875	0.037527	0.563498	-2.40907	-1.35255	0.484003	0.52227	1	0.467816	0.233185	0.45739	0.615236	BnaA04g16900D	0.550166	-3.22934	0.138061	1.97736	-1.83927	0.217556	0.855911	0.108491	0.895143	0.397239	0.442647	0.776502	BnaA04g16900D	1.4272	1.39008	0.0794944	1	1	1
BnaC02g31560D	GSBRNA2T00146915001	1413	AT5G45340.1	CYP707A3	cytochrome P450, family 707, subfamily A, polypeptide 3	BnaC02g31560D	2.03315	0.972639	0.652532	1.76786	0.401398	1.37406	0.000166728	0.12475	0.730196	0.00149744	0.576304	0.346085	BnaC02g31560D	-0.105963	-0.58626	0.289637	0.159334	-0.0150189	-0.43189	0.952726	0.493322	0.893211	0.881852	1	0.741157	BnaC02g31560D	0.265298	0.571241	-0.721527	1	1	0.972894
BnaA09g17560D	GSBRNA2T00070888001	1401	AT5G45340.1	CYP707A3	cytochrome P450, family 707, subfamily A, polypeptide 3	BnaA09g17560D	1.01649	1.10789	0.0522613	1.24336	1.16471	0.547934	0.0207945	0.0210954	1	0.00538188	0.0119724	0.811559	BnaA09g17560D	-0.20579	-0.358016	-0.254702	-0.432662	-0.414835	-0.750375	0.839983	0.637931	0.907544	0.480415	0.510215	0.535199	BnaA09g17560D	-0.226872	-0.0568187	-0.495673	1	1	1	Bra027602	34.6519	14.9983	-1.20814	1.4819e-23	8.70202e-23
BnaC09g18860D	GSBRNA2T00021648001	1401	AT5G45340.1	CYP707A3	cytochrome P450, family 707, subfamily A, polypeptide 3	BnaC09g18860D	0.461317	0.42625	1.17692	0.434922	0.104623	0.597181	0.254374	0.370175	0.150149	0.318843	0.865433	0.502154	BnaC09g18860D	-0.192723	-0.274347	-2.13006	-0.166328	0.0472802	-1.55033	0.818556	0.684179	3.52291e-05	0.798899	0.960947	0.00101679	BnaC09g18860D	0.0263953	0.321627	0.579734	1	1	0.927516
BnaCnng57040D	GSBRNA2T00067701001	1401	AT5G45340.1	CYP707A3	cytochrome P450, family 707, subfamily A, polypeptide 3	BnaCnng57040D	-0.774108	-0.373961	-0.42152	-0.63681	-0.480363	1.11452	0.267085	0.687754	0.953687	0.406566	0.569134	0.730899	BnaCnng57040D	-0.110956	-1.06307	0.601893	-0.248254	-0.956669	-0.934145	0.958436	0.206692	0.831667	0.83026	0.237078	0.648794	BnaCnng57040D	-0.137298	0.106402	-1.53604	1	1	0.927165	Bra021965	44.1079	8.35728	-2.39993	4.65822e-69	5.11347e-68	Bra021965	20.6261	5.90275	-1.80501	8.12376e-25
BnaC07g18360D	GSBRNA2T00067054001	1413	AT5G45340.1	CYP707A3	cytochrome P450, family 707, subfamily A, polypeptide 3	BnaC07g18360D	-3.81559	-0.768494	-3.13187	-3.47987	-1.29615	-2.12592	8.80305e-11	0.271319	0.438799	3.23304e-09	0.0372859	0.726958	BnaC07g18360D	-0.339651	-0.567539	1.00734	-0.675369	-0.0398862	0.00139395	0.775277	0.533637	0.760873	0.382011	0.984461	1	BnaC07g18360D	-0.335719	0.527653	-1.00595	1	1	1
BnaAnng05520D	GSBRNA2T00067882001	1413	AT5G45340.1	CYP707A3	cytochrome P450, family 707, subfamily A, polypeptide 3	BnaAnng05520D	-3.86912	-1.81085	0.799789	-3.72733	-2.24534	-4.14938	4.71407e-11	0.00313769	0.896131	3.11784e-10	0.000162966	0.273862	BnaAnng05520D	-0.148275	-0.40176	-1.81634	-0.290064	0.0327291	3.13284	0.928359	0.694634	0.406199	0.770125	0.990872	0.327971	BnaAnng05520D	-0.141789	0.43449	4.94917	1	1	0.585147
BnaA05g20890D	GSBRNA2T00154046001	1422	AT3G19270.2	CYP707A4	cytochrome P450, family 707, subfamily A, polypeptide 4	BnaA05g20890D	-0.00925062	-2.38513	2.21728	0.0252936	1.88182	1.26649	1	0.254628	0.007179	1	0.379726	0.206467	BnaA05g20890D	0.0115025	2.41179	-2.14142	-0.0230417	-1.85516	-1.19062	1	0.31706	0.0020862	1	0.443625	0.0946765	BnaA05g20890D	-0.0345442	-4.26695	0.950794	1	0.861272	0.855345
BnaC05g33590D	GSBRNA2T00107470001	1482	AT3G19270.2	CYP707A4	cytochrome P450, family 707, subfamily A, polypeptide 4	BnaC05g33590D	-3.27681	-1.57642	1.17843	-3.5121	-3.00803	1.43075	0.0450875	0.38899	0.153395	0.0519975	0.0243614	0.081876	BnaC05g33590D	-0.24553	-1.63766	-0.0643486	-0.0102452	-0.206055	-0.316669	0.941422	0.203888	0.996319	1	0.964262	0.737458	BnaC05g33590D	0.235285	1.43161	-0.25232	1	1	1
Bra019528	more reduced in Zhongshuang																																						Bra019528	97.5131	29.3579	-1.73185	1.4511e-114	2.2129e-113	Bra019528	89.1623	44.3021	-1.00906	2.39162e-49
BnaA07g21990D	GSBRNA2T00099413001	1506	AT1G74920.1	ALDH10A8	aldehyde dehydrogenase 10A8	BnaA07g21990D	-0.186094	-1.06707	0.0291143	-0.0964014	-1.13723	-0.110069	0.556833	0.00010715	1	0.812474	2.65079e-05	0.929279	BnaA07g21990D	-0.018583	0.057026	-0.0240499	-0.108276	0.127191	0.115133	0.991856	0.935341	1	0.823164	0.786946	0.830293	BnaA07g21990D	-0.0896926	0.0701648	0.139183	1	1	1
BnaC03g53290D	GSBRNA2T00129104001	1512	AT3G48170.1	ALDH10A9	aldehyde dehydrogenase 10A9	BnaC03g53290D	-0.385185	-0.1011	-0.353755	-0.323963	-0.303829	-0.311748	0.0617263	0.740672	0.290085	0.147149	0.195091	0.42947	BnaC03g53290D	0.317562	0.0905285	0.164187	0.256341	0.293257	0.12218	0.23361	0.831279	0.623085	0.331481	0.255295	0.728475	BnaC03g53290D	-0.0612213	0.202729	-0.0420071	1	1	1
BnaA06g20780D	GSBRNA2T00016360001	1512	AT3G48170.1	ALDH10A9	aldehyde dehydrogenase 10A9	BnaA06g20780D	-0.485268	-0.24016	-0.204468	-0.253367	-0.113566	0.319869	0.0539912	0.456807	0.723586	0.391337	0.753536	0.553972	BnaA06g20780D	-0.159705	-0.0794382	0.343105	-0.391607	-0.206032	-0.181232	0.750093	0.888926	0.316363	0.195307	0.576138	0.65022	BnaA06g20780D	-0.231902	-0.126593	-0.524337	1	1	0.690813
BnaC06g22720D	GSBRNA2T00143654001	1509	AT1G74920.1	ALDH10A8	aldehyde dehydrogenase 10A8	BnaC06g22720D	-0.686579	-1.13709	-0.222984	-0.432229	-0.981927	-0.499925	0.00413567	3.23745e-06	0.692344	0.109881	9.4245e-05	0.274907	BnaC06g22720D	1.46676	1.4486	0.78917	1.21241	1.29343	1.06611	2.77952e-10	4.9063e-10	0.00344621	3.39081e-07	6.13347e-08	3.83775e-05	BnaC06g22720D	-0.254351	-0.155167	0.276942	1	1	0.941551
Bra015693	induced in both genotypes																																						Bra015693	1561.31	25289.7	4.01772	0	0	Bra015693	992.915	14355.8	3.85382	2.5721e-11
BnaC06g37860D	GSBRNA2T00147859001	1140	AT1G77120.1	ADH1	alcohol dehydrogenase 1	BnaC06g37860D	9.42885	7.93978	-0.149603	9.69246	8.48853	0.342632	1.42207e-50	5.54352e-40	0.966135	3.53303e-52	1.11935e-43	0.832363	BnaC06g37860D	0.135125	-0.0133608	0.324984	-0.128477	-0.562106	-0.167251	0.926116	1	0.738114	0.899347	0.408457	0.893161	BnaC06g37860D	-0.263601	-0.548745	-0.492235	1	1	0.965309
BnaA07g33310D	GSBRNA2T00146534001	1140	AT1G77120.1	ADH1	alcohol dehydrogenase 1	BnaA07g33310D	9.33394	8.39705	-0.014285	9.34909	8.08162	0.33973	5.68314e-50	5.84697e-43	1	5.74334e-50	5.84163e-41	0.825137	BnaA07g33310D	-0.24826	-0.810367	-0.954857	-0.263412	-0.49493	-1.30887	0.8271	0.222608	0.143781	0.749019	0.482297	0.0237023	BnaA07g33310D	-0.015152	0.315437	-0.354015	1	1	1
Bra030945	reduced in both genotypes																																						Bra030945	131.079	38.6501	-1.76189	9.1336e-299	2.2062e-297	Bra030945	134.952	26.5927	-2.34334	0
BnaA08g01200D	GSBRNA2T00114172001	2895	AT1G53310.1	PPC1	phosphoenolpyruvate carboxylase 1	BnaA08g01200D	-1.22364	0.192729	0.123432	-0.779918	-0.491163	0.142382	4.98401e-08	0.547592	0.87643	0.000946162	0.0571844	0.854641	BnaA08g01200D	-0.295777	-0.453292	-0.17207	-0.739501	0.2306	-0.19102	0.399791	0.121691	0.679849	0.00238639	0.495753	0.610959	BnaA08g01200D	-0.443723	0.683892	-0.0189502	0.932617	0.622544	1
BnaC03g69540D	GSBRNA2T00033072001	2676	AT1G53310.1	PPC1	phosphoenolpyruvate carboxylase 1	BnaC03g69540D	-1.44032	0.00130514	0.0334896	-0.83505	-0.179412	0.257439	2.67441e-10	1	1	0.000481966	0.571397	0.656384	BnaC03g69540D	0.13314	0.189738	0.132016	-0.472128	0.370455	-0.0919339	0.800017	0.652107	0.783399	0.0904296	0.217239	0.861196	BnaC03g69540D	-0.605268	0.180718	-0.22395	0.687715	1	0.96919
BnaC06g09980D	GSBRNA2T00082920001	2517	AT1G53310.1	PPC1	phosphoenolpyruvate carboxylase 1	BnaC06g09980D	-2.2738	-0.739125	-0.0655932	-1.51442	-0.534038	0.946378	1.08186e-06	0.188432	1	0.00165151	0.358965	0.252406	BnaC06g09980D	-0.269803	-0.218304	0.0737924	-1.02919	-0.423391	-0.938179	0.790538	0.825093	0.979111	0.0544928	0.539267	0.095371	BnaC06g09980D	-0.759383	-0.205086	-1.01197	1	1	0.693109
BnaC04g02430D	GSBRNA2T00003606001	2895	AT2G42600.2	PPC2	phosphoenolpyruvate carboxylase 2	BnaC04g02430D	-0.920147	-3.59575	-0.226267	-0.652211	-3.76761	-0.0831782	0.103119	8.01541e-10	0.891626	0.251891	2.64159e-13	1	BnaC04g02430D	-2.28321	-3.34694	-1.11228	-2.55115	-3.17508	-1.25537	6.96274e-06	1.96009e-11	0.0486234	1.12575e-06	4.29118e-08	0.0180865	BnaC04g02430D	-0.267936	0.171863	-0.143089	1	1	1
BnaA05g34260D	GSBRNA2T00016792001	2928	AT2G42600.2	PPC2	phosphoenolpyruvate carboxylase 2	BnaA05g34260D	-0.969053	-2.46479	-0.723753	-0.817625	-4.36243	-0.0563527	0.0314015	5.42168e-08	0.327411	0.102708	1.14472e-19	1	BnaA05g34260D	1.55908	0.50584	-0.152599	1.40765	2.40348	-0.819999	0.000782785	0.453905	0.885784	0.00307308	3.19409e-07	0.116266	BnaA05g34260D	-0.151429	1.89764	-0.6674	1	0.150461	0.852482
BnaA04g24600D	GSBRNA2T00088609001	2919	AT2G42600.2	PPC2	phosphoenolpyruvate carboxylase 2	BnaA04g24600D	-1.23135	-3.63774	-0.708581	-1.5403	-3.63486	-0.187703	0.000221749	1.20704e-25	0.147618	1.44358e-05	3.63215e-20	0.864241	BnaA04g24600D	0.879079	2.03587	2.32126	1.18803	2.03299	1.80039	0.0192648	5.67818e-10	3.96516e-13	0.00142269	1.40594e-06	2.55553e-08	BnaA04g24600D	0.308948	-0.00287931	-0.520878	1	1	0.838449	Bra016866	21.1465	2.40429	-3.13674	2.4631e-95	3.34272e-94	Bra016866	28.5068	2.1692	-3.71608	5.677e-157
BnaC04g48440D	GSBRNA2T00084729001	2895	AT2G42600.2	PPC2	phosphoenolpyruvate carboxylase 2	BnaC04g48440D	-1.73054	-2.91279	-0.334467	-1.79906	-3.37657	0.0422994	2.21258e-05	8.54964e-12	0.733359	1.58958e-05	3.26161e-15	1	BnaC04g48440D	-0.102653	0.329575	-0.0198439	-0.0341341	0.793362	-0.39661	0.935646	0.651915	1	0.980034	0.11376	0.516005	BnaC04g48440D	0.0685191	0.463787	-0.376766	1	1	0.970451
BnaA05g24610D	GSBRNA2T00104838001	2331	AT3G14940.2	PPC3	phosphoenolpyruvate carboxylase 3	BnaA05g24610D	-2.37938	-1.31507	-1.51683	-1.90137	-0.789022	-2.38882	2.5777e-06	0.0189539	0.16225	0.000275211	0.181246	0.159112	BnaA05g24610D	1.39101	1.11127	1.20041	0.913007	0.585231	2.0724	0.0124966	0.0670185	0.170479	0.141571	0.405402	0.122546	BnaA05g24610D	-0.478007	-0.526043	0.871982	1	1	0.96482
BnaC05g38590D	GSBRNA2T00106160001	2802	AT3G14940.2	PPC3	phosphoenolpyruvate carboxylase 3	BnaC05g38590D	-2.42607	-0.94897	0.51204	-1.83039	0.0426472	0.389024	8.31775e-09	0.0474931	0.764303	1.91843e-05	0.969204	0.908669	BnaC05g38590D	-0.151526	0.332204	0.722564	-0.747214	-0.659413	0.84558	0.894166	0.658855	0.555387	0.14832	0.218457	0.417944	BnaC05g38590D	-0.595688	-0.991617	0.123016	1	0.898509	1
BnaC03g38810D	GSBRNA2T00123751001	2139	AT3G14940.2	PPC3	phosphoenolpyruvate carboxylase 3	BnaC03g38810D	-2.75969	-1.4353	-0.345133	0.185236	-2.03227	0.449452	1.26718e-05	0.0344432	0.890129	0.849101	0.00173312	0.846774	BnaC03g38810D	0.910299	-0.566594	0.464745	-2.03463	0.0303774	-0.32984	0.276542	0.568398	0.723103	0.00250333	0.9931	0.82141	BnaC03g38810D	-2.94493	0.596971	-0.794585	0.0332249	1	0.940176
BnaA03g33640D	GSBRNA2T00137595001	2325	AT3G14940.2	PPC3	phosphoenolpyruvate carboxylase 3	BnaA03g33640D	-3.05919	-1.86702	-0.340796	-1.69924	-2.6365	-0.349309	1.38354e-12	2.99478e-05	0.747581	9.10271e-05	1.6993e-09	0.764526	BnaA03g33640D	0.574659	-0.178976	-0.037237	-0.785296	0.590507	-0.0287239	0.355861	0.847381	1	0.130265	0.301164	1	BnaA03g33640D	-1.35996	0.769483	0.00851307	0.403735	1	1
BnaC06g02620D	GSBRNA2T00039034001	1494	AT1G68750.1	PPC4	phosphoenolpyruvate carboxylase 4	BnaC06g02620D	-1.30517	-2.52407	0.220811	-1.51442	-0.0298349	-0.581707	0.404574	0.0804049	0.910553	0.150314	1	0.619598	BnaC06g02620D	-1.99041	0.625949	-1.04089	-1.78116	-1.86829	-0.238374	0.0655527	0.73982	0.0909179	0.332489	0.317158	0.809072	BnaC06g02620D	0.209245	-2.49424	0.802517	1	1	0.840736
BnaA09g28740D	GSBRNA2T00090574001	3414	AT1G68750.1	PPC4	phosphoenolpyruvate carboxylase 4	BnaA09g28740D	-1.41545	-1.2926	0.49975	-0.875601	-1.03081	0.29204	3.40204e-05	0.000417772	0.573098	0.016422	0.00507767	0.851512	BnaA09g28740D	0.0627972	-0.179575	0.602955	-0.477049	-0.441367	0.810665	0.957392	0.801672	0.352163	0.297053	0.352345	0.140679	BnaA09g28740D	-0.539846	-0.261791	0.20771	1	1	1	Bra024730	97.8677	3.90006	-4.64926	0	0	Bra024730	78.7075	4.79268	-4.0376	0
BnaC05g20500D	GSBRNA2T00142427001	3165	AT1G68750.1	PPC4	phosphoenolpyruvate carboxylase 4	BnaC05g20500D	-1.43615	-2.13536	0.704302	-1.39649	-2.07196	0.575806	2.4746e-06	1.76493e-11	0.202424	8.532e-06	3.69925e-11	0.38513	BnaC05g20500D	-0.0733982	-0.41052	-0.282222	-0.113058	-0.473914	-0.153727	0.938935	0.352979	0.644319	0.855679	0.283503	0.822348	BnaC05g20500D	-0.0396598	-0.0633947	0.128496	1	1	1
[truncated: 38 more columns]

## Sheet: TableS8B
Table S8B: Comparison to Ding et al. 2020
ID	ID	QueryLength	Arabidopsis_regulation	HitAcc	symbol	description	ID	logFC Root_H4h_AV	logFC Root_H24h_AV	logFC Leaf_H24h_AV	logFC Root_H4h_ZS	logFC Root_H24h_ZS	logFC Leaf_H24h_ZS	FDR Root_H4h_AV	FDR Root_H24h_AV	FDR Leaf_H24h_AV	FDR Root_H4h_ZS	FDR Root_H24h_ZS	FDR Leaf_H24h_ZS	ID	logFC Root_K4h_GT	logFC Root_K24h_GT	logFC Leaf_K24h_GT	logFC Root_H4h_GT	logFC Root_H24h_GT	logFC Leaf_H24h_GT	FDR Root_K4h_GT	FDR Root_K24h_GT	FDR Leaf_K24h_GT	FDR Root_H4h_GT	FDR Root_H24h_GT	FDR Leaf_H24h_GT		logFC Root_4h_GT	logFC Root_24h_GT	logFC Leaf_24h_GT	FDR Root_4h_GT	FDR Root_24h_GT	FDR Leaf_24h_GT	HitAcc	GeneID	ZS9_0h RPKM	ZS9_12h RPKM	log2 Ratio 12h 0h	P value	FDR	HitAcc	GeneID	GH01_0h RPKM
BnA07CAT3	more reduced in Zhongshuang
BnaA06g14510D	GSBRNA2T00043215001	1479		AT1G20620.1	CAT3	catalase 3	BnaA06g14510D	-1.38942	-0.694239	0.501906	-1.0628	-2.41696	-1.07431	0.123333	0.585007	0.707824	0.388282	0.27473	0.311184	BnaA06g14510D	0.851747	2.45745	-1.12795	0.525136	4.18017	0.448266	0.52291	0.0628614	0.128761	0.776697	0.0238303	0.626416	BnaA06g14510D	-0.326611	1.72272	1.57621	1	1	0.497369	BnaA06g14510D	Bra025832	71.7853	19.4462	-1.8842	9.22964e-93	1.22702e-91	BnaA06g14510D
BnaA07g11370D	GSBRNA2T00112341001	1671		AT1G20620.1	CAT3	catalase 3	BnaA07g11370D	-0.409138	-0.0805032	0.0671374	-1.49584	-0.222609	0.323674	0.441969	0.929252	1	0.00149485	0.742262	0.809101	BnaA07g11370D	-0.41062	0.0824684	-0.0729763	0.676085	0.224575	-0.329513	0.615393	0.949946	0.97665	0.249232	0.780623	0.658906	BnaA07g11370D	1.0867	0.142106	-0.256537	0.765001	1	1	BnaA07g11370D	Bra012238	1741.08	389.635	-2.15979	0	0	BnaA07g11370D	Bra012238	1600.79
BnaA08g21730D	GSBRNA2T00102833001	1479		AT1G20620.1	CAT3	catalase 3	BnaA08g21730D	-1.23378	-1.02044	0.184327	-1.6784	-0.803473	0.286319	8.74479e-05	0.00350366	0.84636	1.07473e-07	0.0220708	0.725771	BnaA08g21730D	-0.82653	-0.313514	-0.436114	-0.381916	-0.530484	-0.538106	0.0198871	0.555515	0.324759	0.382748	0.195822	0.171487	BnaA08g21730D	0.444614	-0.216969	-0.101992	1	1	1	BnaA08g21730D	Bra016459	289.804	18.3807	-3.97882	0	0	BnaA08g21730D	Bra016459	417.221
BnaC05g15970D	GSBRNA2T00047774001	1503		AT1G20620.6	CAT3	catalase 3	BnaC05g15970D	1.48973	-2.15703	0.130199	-0.631981	0.296414	0.47621	0.155617	0.0354898	0.983714	0.66792	0.914758	0.746394	BnaC05g15970D	-0.917248	3.13393	1.14873	1.20447	0.680481	0.80272	0.622474	0.00459709	0.0944223	0.38646	0.766092	0.272076	BnaC05g15970D	2.12171	-2.45345	-0.346011	0.888002	1	1	BnaC05g15970D							BnaC05g15970D
BnaC07g15280D	GSBRNA2T00050618001	1479		AT1G20620.1	CAT3	catalase 3	BnaC07g15280D	-1.24041	-0.120565	0.547541	-1.53383	-0.43896	0.554459	0.000272896	0.833216	0.363492	8.69372e-06	0.296873	0.403763	BnaC07g15280D	-0.214999	-0.0239773	-0.148808	0.0784216	0.294418	-0.155725	0.768037	0.990547	0.844714	0.91638	0.572827	0.819271	BnaC07g15280D	0.29342	0.318395	-0.00691788	1	1	1	BnaC07g15280D							BnaC07g15280D
BnaC08g19360D	GSBRNA2T00054982001	1479		AT1G20620.1	CAT3	catalase 3	BnaC08g19360D	-0.803157	-0.83185	0.456803	-1.60691	-1.478	0.387595	0.0923779	0.123753	0.638434	0.000546	0.00247274	0.737496	BnaC08g19360D	-0.379082	-0.409706	-0.57885	0.424668	0.236444	-0.509642	0.648268	0.59607	0.366707	0.521821	0.768237	0.422218	BnaC08g19360D	0.803749	0.64615	0.0692078	0.970306	1	1	BnaC08g19360D							BnaC08g19360D
BnA07SKS17	more reduced in Zhongshuang
BnaA07g12260D	GSBRNA2T00112459001	1638		AT5G66920.1	sks17	SKU5 similar 17	BnaA07g12260D	-0.935017	-0.458515	-0.538862	-0.528753	-0.542824	0.41218	0.0768221	0.49838	0.625864	0.386882	0.390385	0.762743	BnaA07g12260D	-0.108143	-0.0835642	0.80402	-0.514408	0.00074502	-0.147022	0.947414	0.955234	0.237216	0.472194	1	0.909081	BnaA07g12260D	-0.406264	0.0843092	-0.951042	1	1	0.768509	BnaA07g12260D	Bra012117	88.4962	6.7348	-3.71591	5.4277e-258	1.2407e-256	BnaA07g12260D	Bra012117	42.1008
BnaA09g07690D	GSBRNA2T00005688001	1626		AT5G66920.1	sks17	SKU5 similar 17	BnaA09g07690D	-1.28845	-1.10167	-0.78259	-0.794981	-0.980851	0.571429	0.0343272	0.110485	0.484693	0.244447	0.153247	0.706008	BnaA09g07690D	0.0337133	-0.00087416	0.949358	-0.459755	-0.121693	-0.404661	0.995383	1	0.230299	0.61126	0.925087	0.679337	BnaA09g07690D	-0.493468	-0.120819	-1.35402	1	1	0.639073	BnaA09g07690D							BnaA09g07690D
BnaAnng28440D	GSBRNA2T00079900001	1341		AT5G66920.1	sks17	SKU5 similar 17	BnaAnng28440D	-0.298132	-1.0017	-0.163769	-0.418446	-1.11385	0.599036	0.285438	0.00013755	0.87033	0.137218	1.67413e-05	0.281685	BnaAnng28440D	-0.186124	-0.025176	0.458939	-0.0658102	0.0869753	-0.303866	0.703379	0.979059	0.281515	0.901096	0.860124	0.50957	BnaAnng28440D	0.120314	0.112151	-0.762805	1	1	0.590662	BnaAnng28440D							BnaAnng28440D
BnaC02g16540D	GSBRNA2T00076849001	1626		AT5G66920.1	sks17	SKU5 similar 17	BnaC02g16540D	-0.760869	-0.732076	-0.30102	-0.350904	-0.951291	0.286032	0.022439	0.047574	0.729652	0.374472	0.00613858	0.800778	BnaC02g16540D	-0.301575	0.0258097	0.895977	-0.71154	0.245025	0.308925	0.600127	0.986902	0.0408591	0.0576193	0.634886	0.607877	BnaC02g16540D	-0.409965	0.219215	-0.587051	1	1	0.852608	BnaC02g16540D	Bra036800	180.51	19.8689	-3.1835	0	0	BnaC02g16540D	Bra036800	140.097
BnaC07g16450D	GSBRNA2T00070396001	1632		AT5G66920.1	sks17	SKU5 similar 17	BnaC07g16450D	-1.5725	-0.9305	-0.269337	-1.24179	-0.865559	0.103139	2.96466e-07	0.00576807	0.751785	8.3335e-05	0.00946528	0.972369	BnaC07g16450D	-0.194497	-0.00738237	0.122631	-0.525205	-0.0723229	-0.249844	0.766678	1	0.883818	0.185095	0.913751	0.665862	BnaC07g16450D	-0.330708	-0.0649405	-0.372476	1	1	0.94447	BnaC07g16450D							BnaC07g16450D
BnaC09g07640D	GSBRNA2T00134907001	1626		AT5G66920.1	sks17	SKU5 similar 17	BnaC09g07640D	0.030221	-0.503476	-0.215292	0.618992	-0.376665	0.0171677	0.945879	0.10834	0.761249	0.0305561	0.240047	1	BnaC09g07640D	0.151301	-0.199379	-0.0498177	-0.43747	-0.32619	-0.282277	0.800773	0.683539	0.968955	0.189802	0.377879	0.503112	BnaC09g07640D	-0.588771	-0.126811	-0.23246	0.839925	1	0.986674	BnaC09g07640D							BnaC09g07640D
BnA07OTLD1	more reduced in Zhongshuang
BnaA04g15810D	GSBRNA2T00045282001	1443		AT2G27350.1	OTLD1	OTU-like cysteine protease family protein	BnaA04g15810D	0.79251	-0.0495598	-0.5877	0.725441	0.477112	0.0156002	0.00124264	0.917759	0.120185	0.00528703	0.0965442	1	BnaA04g15810D	0.333826	0.486798	0.480499	0.400895	-0.0398741	-0.122802	0.370944	0.126832	0.136209	0.193433	0.946641	0.810859	BnaA04g15810D	0.067069	-0.526672	-0.6033	1	1	0.629381	BnaA04g15810D							BnaA04g15810D
BnaA07g13150D	GSBRNA2T00118653001	1437		AT2G27350.1	OTLD1	OTU-like cysteine protease family protein	BnaA07g13150D	0.397907	0.0331787	-0.417841	0.251797	0.0685942	-0.0917441	0.231131	0.962303	0.465096	0.514475	0.901367	0.971223	BnaA07g13150D	-0.119757	0.106158	0.0486091	0.0263519	0.0707427	-0.277488	0.879465	0.878801	0.976969	0.978618	0.912806	0.545879	BnaA07g13150D	0.146109	-0.0354155	-0.326097	1	1	0.946677	BnaA07g13150D	Bra012023	55.8112	10.5842	-2.39864	8.4008e-102	1.187e-100	BnaA07g13150D	Bra012023	40.2105
BnaC04g16920D	GSBRNA2T00148319001	1473		AT2G27350.1	OTLD1	OTU-like cysteine protease family protein	BnaC04g16920D	0.481056	0.324755	0.199355	0.134706	0.0350954	0.0309221	0.0245629	0.203424	0.678947	0.633781	0.934226	1	BnaC04g16920D	-0.253809	-0.331847	-1.35606	0.092541	-0.0421879	-1.18763	0.436082	0.249694	3.07293e-11	0.806228	0.928397	8.88764e-09	BnaC04g16920D	0.34635	0.28966	0.168432	0.999354	1	0.991188	BnaC04g16920D							BnaC04g16920D
BnaC04g39080D	GSBRNA2T00127712001	1437		AT2G27350.1	OTLD1	OTU-like cysteine protease family protein	BnaC04g39080D	-0.00897946	-0.00024342	0.222074	-0.311504	-0.161412	0.0266221	0.983566	1	0.561726	0.119397	0.485711	1	BnaC04g39080D	-0.17305	-0.0540848	-0.155702	0.129474	0.107083	0.0397491	0.571429	0.898086	0.614526	0.650402	0.721287	0.949126	BnaC04g39080D	0.302525	0.161168	0.195452	0.989291	1	0.950958	BnaC04g39080D							BnaC04g39080D
BnaA07g29460D	more induced in Zhongshuang
BnaA07g23450D	GSBRNA2T00099596001	1089		AT1G71695.1		Peroxidase superfamily protein	BnaA07g23450D	-0.914136	-2.177	0.537916	-1.73505	-1.94433	-0.234135	0.106134	0.00168889	0.553613	0.00741619	0.0198558	0.883214	BnaA07g23450D	0.395865	0.807613	-0.864675	1.21678	0.574939	-0.0926237	0.692575	0.322541	0.122132	0.114087	0.692894	0.952127	BnaA07g23450D	0.820914	-0.232674	0.772051	1	1	0.812151	BnaA07g23450D							BnaA07g23450D
BnaA07g29460D	GSBRNA2T00102485001	1089		AT1G71695.1		Peroxidase superfamily protein	BnaA07g29460D	1.80322	1.72187	0.627448	1.24346	1.39103	0.467075	8.97328e-06	6.40819e-05	0.401755	0.00339811	0.00130189	0.627597	BnaA07g29460D	-0.250841	0.0469326	-0.835919	0.308918	0.377781	-0.675545	0.774942	0.973819	0.102575	0.627941	0.533365	0.195084	BnaA07g29460D	0.559759	0.330848	0.160374	1	1	1	BnaA07g29460D	Bra016127	25.6313	437.641	4.09377	6.95888e-13	2.66512e-12	BnaA07g29460D	Bra016127	35.642
BnaAnng12900D	GSBRNA2T00011506001	1089		AT1G71695.1		Peroxidase superfamily protein	BnaAnng12900D	-0.00726889	-0.983003	1.51741	-0.717223	-1.97661	0.31847	1	0.056816	0.0167233	0.134891	9.59042e-05	0.734	BnaAnng12900D	-0.228888	-0.339003	-2.31648	0.481066	0.654606	-1.11754	0.78932	0.62671	2.08406e-07	0.428004	0.409231	0.00762199	BnaAnng12900D	0.709955	0.99361	1.19894	0.984237	1	0.477615	BnaAnng12900D							BnaAnng12900D
BnaC06g32660D	GSBRNA2T00103208001	1089		AT1G71695.1		Peroxidase superfamily protein	BnaC06g32660D	3.29569	3.92084	0.474444	0.843028	0.726586	0.156872	4.27215e-25	2.81231e-33	0.39813	0.00917554	0.0326792	0.894464	BnaC06g32660D	-4.05409	-4.00478	0.917518	-1.60143	-0.81053	1.23509	4.35425e-36	2.8353e-35	0.00784055	1.89846e-07	0.0175716	0.000113551	BnaC06g32660D	2.45266	3.19425	0.317573	2.80829e-06	8.40311e-11	0.9551	BnaC06g32660D							BnaC06g32660D
BnaA07g31960D	more reduced in Zhongshuang
BnaC06g35970D	more reduced in Zhongshuang
BnaA07g21820D	GSBRNA2T00099394001	1953		AT1G75200.1		flavodoxin family protein / radical SAM domain-containing protein	BnaA07g21820D	0.0292771	0.438352	-0.435941	0.543003	0.253231	-1.32731	0.960348	0.295183	0.552484	0.142105	0.569658	0.00759669	BnaA07g21820D	-0.105688	-0.349042	-0.157962	-0.619414	-0.163921	0.733406	0.909238	0.521002	0.837193	0.114704	0.778328	0.116588	BnaA07g21820D	-0.513726	0.185121	0.891367	1	1	0.605843	BnaA07g21820D							BnaA07g21820D
BnaA07g31960D	GSBRNA2T00081927001	1932		AT1G75200.1		flavodoxin family protein / radical SAM domain-containing protein	BnaA07g31960D	0.118339	0.348451	-0.717999	0.375569	0.265019	-0.965434	0.727344	0.299953	0.0857266	0.218165	0.434068	0.0113546	BnaA07g31960D	0.035104	-0.34466	-0.625171	-0.222126	-0.261228	-0.377736	0.972472	0.386057	0.0606718	0.575218	0.502243	0.357751	BnaA07g31960D	-0.25723	0.0834322	0.247435	1	1	0.982894	BnaA07g31960D	Bra015860	55.1339	6.31192	-3.12679	1.9687e-164	3.7156e-163	BnaA07g31960D	Bra015860	50.4397
BnaC06g22530D	GSBRNA2T00143686001	1782		AT1G75200.1		flavodoxin family protein / radical SAM domain-containing protein	BnaC06g22530D	0.280089	0.467751	-2.14778	0.940819	1.11963	-1.15862	0.664041	0.507456	0.0103931	0.10004	0.0536919	0.24758	BnaC06g22530D	0.0240807	0.120113	-0.615648	-0.636649	-0.53177	-1.60481	0.997945	0.930369	0.469884	0.358845	0.475001	0.0380576	BnaC06g22530D	-0.66073	-0.651884	-0.989162	1	1	0.84107	BnaC06g22530D							BnaC06g22530D
BnaC06g35970D	GSBRNA2T00103628001	1932		AT1G75200.1		flavodoxin family protein / radical SAM domain-containing protein	BnaC06g35970D	0.607938	0.729825	-0.266179	0.644527	0.87074	-0.612981	0.0285851	0.0149043	0.699779	0.0255968	0.00246154	0.22219	BnaC06g35970D	0.0392697	0.0585261	-0.488196	0.00268056	-0.0823888	-0.141393	0.969904	0.936861	0.201566	1	0.877187	0.814653	BnaC06g35970D	-0.0365891	-0.140915	0.346803	1	1	0.931747	BnaC06g35970D							BnaC06g35970D
BnC01RPN1b	more reduced in Zhongshuang
BnaA01g08440D	GSBRNA2T00058090001	2679		AT4G28470.1	RPN1B	26S proteasome regulatory subunit S2 1B	BnaA01g08440D	-0.592453	-0.571488	-0.17785	-0.290352	-0.30048	0.00262637	0.00392334	0.0112681	0.734161	0.226839	0.228237	1	BnaA01g08440D	0.252669	0.404428	0.118877	-0.0494325	0.13342	-0.0615991	0.422169	0.117967	0.782961	0.912256	0.698473	0.915811	BnaA01g08440D	-0.302102	-0.271008	-0.180476	1	1	0.986439	BnaA01g08440D	Bra011030	77.4303	8.19577	-3.23995	0	0	BnaA01g08440D	Bra011030	66.4323
BnaA03g49280D	GSBRNA2T00044368001	2676		AT4G28470.1	RPN1B	26S proteasome regulatory subunit S2 1B	BnaA03g49280D	-0.49854	-0.97619	-0.690058	-0.311246	0.103179	0.578232	0.404603	0.114529	0.499425	0.660633	0.916879	0.637645	BnaA03g49280D	-0.382842	-0.0565372	0.344028	-0.570136	-1.13591	-0.924262	0.708524	0.976545	0.722509	0.435394	0.0617117	0.154055	BnaA03g49280D	-0.187294	-1.07937	-1.26829	1	1	0.610076	BnaA03g49280D	Bra024200	57.9128	12.5145	-2.21028	2.3567e-164	4.44e-163	BnaA03g49280D	Bra024200	57.5606
BnaC01g09980D	GSBRNA2T00065813001	2679		AT4G28470.1	RPN1B	26S proteasome regulatory subunit S2 1B	BnaC01g09980D	-0.559113	-0.338147	-0.102925	-0.257237	-0.381224	0.111385	0.00412313	0.143738	0.87692	0.259823	0.0832238	0.869863	BnaC01g09980D	0.0391887	0.0165555	-0.0447071	-0.262687	0.0596324	-0.259018	0.95188	0.984336	0.947175	0.306764	0.876732	0.338361	BnaC01g09980D	-0.301875	0.0430769	-0.214311	1	1	0.94447	BnaC01g09980D							BnaC01g09980D
BnaC07g41330D	GSBRNA2T00154714001	2676		AT4G28470.1	RPN1B	26S proteasome regulatory subunit S2 1B	BnaC07g41330D	-0.649114	-0.297595	-0.14027	-0.398751	-0.41448	0.0717872	0.00358898	0.286924	0.830423	0.105634	0.101625	0.965535	BnaC07g41330D	-0.270099	-0.31352	-0.196175	-0.520462	-0.196635	-0.408232	0.432453	0.326712	0.595484	0.0382818	0.557983	0.142098	BnaC07g41330D	-0.250363	0.116885	-0.212057	1	1	0.967557	BnaC07g41330D							BnaC07g41330D
BnC06XRN3	more reduced in Zhongshuang
BnaA02g17350D	GSBRNA2T00067189001	3117		AT1G75660.1	XRN3	5'-3' exoribonuclease 3	BnaA02g17350D	0.658843	0.833101	-0.329723	0.693261	1.00325	0.302845	0.0321502	0.0109067	0.624056	0.0295079	0.00140392	0.700027	BnaA02g17350D	-0.0340592	0.231493	0.397723	-0.0684774	0.0613395	-0.234845	0.978165	0.669801	0.368529	0.915747	0.926049	0.639127	BnaA02g17350D	-0.0344182	-0.170153	-0.632569	1	1	0.719668	BnaA02g17350D	Bra008212	26.1213	3.25195	-3.00585	1.3677e-122	2.1826e-121	BnaA02g17350D	Bra008212	17.1969
BnaAnng09050D	GSBRNA2T00087565001	3045		AT1G75660.1	XRN3	5'-3' exoribonuclease 3	BnaAnng09050D	0.440325	0.338538	-0.367351	0.572543	0.418323	-0.196547	0.0841056	0.260987	0.417004	0.0267769	0.136852	0.773713	BnaAnng09050D	0.283916	0.289597	0.380576	0.151698	0.209812	0.209772	0.46172	0.442168	0.25351	0.702635	0.566577	0.58793	BnaAnng09050D	-0.132218	-0.0797853	-0.170804	1	1	1	BnaAnng09050D	Bra015828	24.8886	4.99807	-2.31604	6.42844e-86	8.1331e-85	BnaAnng09050D	Bra015828	22.965
BnaC02g23590D	GSBRNA2T00077892001	3093		AT1G75660.1	XRN3	5'-3' exoribonuclease 3	BnaC02g23590D	0.229398	0.147998	-0.255802	0.433949	0.199083	0.0770783	0.348512	0.635437	0.592864	0.0649314	0.476247	0.957713	BnaC02g23590D	-0.0493269	0.0316546	0.0708908	-0.253878	-0.0194301	-0.261989	0.943576	0.962463	0.906196	0.390255	0.976809	0.419005	BnaC02g23590D	-0.204551	-0.0510847	-0.33288	1	1	0.874517	BnaC02g23590D							BnaC02g23590D
BnaC06g36330D	GSBRNA2T00103678001	3015		AT1G75660.1	XRN3	5'-3' exoribonuclease 3	BnaC06g36330D	0.587058	0.659455	-0.200612	0.742984	0.800755	-0.0962199	0.00426455	0.00267996	0.667321	0.000330845	0.000145891	0.914363	BnaC06g36330D	-0.0892205	0.0227703	-0.0192938	-0.245146	-0.118529	-0.123686	0.86274	0.975614	1	0.379879	0.73112	0.744414	BnaC06g36330D	-0.155926	-0.141299	-0.104392	1	1	1	BnaC06g36330D							BnaC06g36330D
BnaC07g30500D	more reduced in Zhongshuang
BnaA06g26460D	GSBRNA2T00147469001	2799		AT5G23890.1		GPI-anchored adhesin-like protein	BnaA06g26460D	0.100786	0.418125	-0.153534	0.386893	0.632071	0.112328	0.711666	0.0904898	0.778925	0.100305	0.00497666	0.882382	BnaA06g26460D	-0.122069	-0.133669	0.125688	-0.408175	-0.347616	-0.140174	0.795179	0.748997	0.759174	0.10623	0.192651	0.698035	BnaA06g26460D	-0.286107	-0.213947	-0.265862	1	1	0.917814	BnaA06g26460D	Bra009713	46.6191	2.86211	-4.02577	1.7919e-246	4.0268e-245	BnaA06g26460D	Bra009713	36.5528
BnaA09g05120D	GSBRNA2T00094759001	2724		AT5G23890.1		GPI-anchored adhesin-like protein	BnaA09g05120D	-0.962091	-0.414367	-0.272146	-0.793226	-0.0247398	0.395793	0.00263312	0.305143	0.68035	0.0133512	0.981167	0.530476	BnaA09g05120D	-1.08052	-0.542793	-0.514213	-1.24938	-0.93242	-1.18215	0.000624604	0.188415	0.176346	0.000124159	0.00601096	7.93174e-05	BnaA09g05120D	-0.168865	-0.389627	-0.667939	1	1	0.651377	BnaA09g05120D							BnaA09g05120D
BnaC07g30500D	GSBRNA2T00133460001	2802		AT5G23890.1		GPI-anchored adhesin-like protein	BnaC07g30500D	0.039072	0.381391	-0.241464	0.283116	0.657964	0.0451076	0.904123	0.137107	0.603081	0.265935	0.00401251	1	BnaC07g30500D	-0.116976	-0.147384	0.0536748	-0.36102	-0.423957	-0.232897	0.812614	0.720903	0.938176	0.178234	0.0991763	0.459217	BnaC07g30500D	-0.244044	-0.276573	-0.286572	1	1	0.90656	BnaC07g30500D							BnaC07g30500D
BnaC09g04680D	GSBRNA2T00146072001	2715		AT5G23890.1		GPI-anchored adhesin-like protein	BnaC09g04680D	0.461055	0.31072	-0.305263	0.557837	0.236694	-0.258189	0.0361374	0.240418	0.432	0.0137606	0.384461	0.593575	BnaC09g04680D	0.0580103	0.0338657	0.284624	-0.0387721	0.107892	0.237551	0.928845	0.958436	0.335541	0.938238	0.774292	0.435923	BnaC09g04680D	-0.0967824	0.0740261	-0.0470736	1	1	1	BnaC09g04680D							BnaC09g04680D
BnC07FER	more reduced in Zhongshuang
BnaA01g19380D	GSBRNA2T00054041001	2571		AT3G51550.1	FER	Malectin/receptor-like protein kinase family protein	BnaA01g19380D	-0.141766	-0.300416	0.0190133	0.158052	0.111715	-0.276196	0.552266	0.217419	1	0.536844	0.695671	0.563098	BnaA01g19380D	0.0775101	0.0422161	-0.368721	-0.222308	-0.369915	-0.0735116	0.881496	0.937078	0.182636	0.423124	0.125118	0.884633	BnaA01g19380D	-0.299818	-0.412131	0.295209	1	1	0.894213	BnaA01g19380D	Bra038906	34.335	16.5819	-1.05007	7.34704e-14	3.2347e-13	BnaA01g19380D
BnaA03g41360D	GSBRNA2T00151294001	2445		AT3G51550.1	FER	Malectin/receptor-like protein kinase family protein	BnaA03g41360D	-0.069765	-0.260047	-0.15309	-0.230271	0.0114101	-0.0782705	0.854447	0.478563	0.878849	0.503134	1	0.983804	BnaA03g41360D	-0.0525696	0.0298125	-0.0592162	0.107936	-0.241645	-0.134036	0.95367	0.976026	0.95924	0.829952	0.55667	0.825845	BnaA03g41360D	0.160506	-0.271458	-0.0748199	1	1	1	BnaA03g41360D							BnaA03g41360D
BnaA09g32070D	GSBRNA2T00129285001	2556		AT3G51550.1	FER	Malectin/receptor-like protein kinase family protein	BnaA09g32070D	-0.735643	-0.266806	-0.329288	-0.591337	-0.192676	-0.317366	0.00252644	0.403473	0.498052	0.0218309	0.551411	0.569106	BnaA09g32070D	-0.174262	-0.167454	-0.459104	-0.318568	-0.241584	-0.471025	0.720914	0.71658	0.147554	0.325893	0.496971	0.122556	BnaA09g32070D	-0.144306	-0.0741302	-0.0119216	1	1	1	BnaA09g32070D							BnaA09g32070D
BnaC01g23340D	GSBRNA2T00090802001	2601		AT3G51550.1	FER	Malectin/receptor-like protein kinase family protein	BnaC01g23340D	0.034486	0.54319	-0.140894	0.972965	1.24798	-0.0786055	0.952974	0.192103	0.923323	0.00613066	0.000477194	0.99468	BnaC01g23340D	0.149209	0.0268768	-0.418786	-0.78927	-0.677918	-0.481074	0.861304	0.987281	0.412675	0.0405031	0.0928994	0.3013	BnaC01g23340D	-0.938479	-0.704795	-0.0622883	0.606146	1	1	BnaC01g23340D	Bra012850	131.345	17.0687	-2.94393	0	0	BnaC01g23340D	Bra012850	71.2331
BnaC07g32280D	GSBRNA2T00041754001	2412		AT3G51550.1	FER	Malectin/receptor-like protein kinase family protein	BnaC07g32280D	0.162339	0.137041	0.316457	-0.109401	0.179688	-0.302785	0.595196	0.717272	0.560783	0.767665	0.596778	0.627053	BnaC07g32280D	-0.170228	0.018568	-0.294178	0.101513	-0.0240786	0.325063	0.74074	0.988853	0.46836	0.826466	0.97399	0.382297	BnaC07g32280D	0.271741	-0.0426466	0.619242	1	1	0.631292	BnaC07g32280D							BnaC07g32280D
BnaC08g22890D	GSBRNA2T00109312001	3531		AT3G51550.1	FER	Malectin/receptor-like protein kinase family protein	BnaC08g22890D	-1.15484	-0.373193	-0.299418	-0.682392	-0.221233	-0.114399	1.10944e-05	0.262751	0.606743	0.015892	0.530913	0.927722	BnaC08g22890D	0.24938	0.092451	0.0951027	-0.22307	-0.0595091	-0.0899162	0.600287	0.881126	0.887978	0.585094	0.918114	0.888267	BnaC08g22890D	-0.47245	-0.15196	-0.185019	0.977755	1	1	BnaC08g22890D							BnaC08g22890D
BnC07AR1	more reduced in Zhongshuang
BnaA01g13900D	GSBRNA2T00056319001	2085		AT4G24520.1	ATR1	P450 reductase 1	BnaA01g13900D	-1.49692	-2.03296	-0.0183109	-1.67708	-1.46015	0.398722	0.000122505	8.75861e-07	1	0.00203134	0.0152334	0.774424	BnaA01g13900D	1.64309	2.13866	1.8949	1.82325	1.56585	1.47786	5.68936e-05	1.43506e-07	2.41036e-05	0.000694189	0.00803984	0.001584	BnaA01g13900D	0.180163	-0.572809	-0.417033	1	1	0.970451	BnaA01g13900D							BnaA01g13900D
BnaA01g13910D	GSBRNA2T00056320001	2088		AT4G24520.1	ATR1	P450 reductase 1	BnaA01g13910D	0.532236	0.520876	-0.0302952	0.232722	0.542486	-0.022422	0.00940372	0.0208281	1	0.343245	0.0131758	1	BnaA01g13910D	-0.0153316	-0.0621031	-0.29273	0.284182	-0.083713	-0.300603	0.991026	0.89898	0.329113	0.282735	0.822656	0.292801	BnaA01g13910D	0.299514	-0.0216098	-0.0078732	1	1	1	BnaA01g13910D	Bra013811	23.6197	4.46568	-2.40304	7.94052e-59	7.91895e-58	BnaA01g13910D	Bra013811	22.4243
BnaA03g46760D	GSBRNA2T00048968001	2088		AT4G24520.1	ATR1	P450 reductase 1	BnaA03g46760D	-0.27057	-0.380021	0.00192772	-0.21425	-0.237796	0.0474086	0.328524	0.20344	1	0.481908	0.442279	1	BnaA03g46760D	-1.23751	-1.49302	-1.64986	-1.29383	-1.63524	-1.69534	2.31801e-07	2.48125e-10	2.83106e-11	5.92239e-08	3.60089e-12	7.83491e-12	BnaA03g46760D	-0.0563205	-0.142225	-0.0454809	1	1	1	BnaA03g46760D	Bra019223	38.9303	5.07362	-2.93981	1.0605e-114	1.6179e-113	BnaA03g46760D	Bra019223	40.5487
BnaC01g16350D	GSBRNA2T00116101001	2088		AT4G24520.1	ATR1	P450 reductase 1	BnaC01g16350D	0.100218	0.340297	-0.114736	0.406762	0.135387	-0.854411	0.833322	0.459965	0.9558	0.32631	0.80119	0.134108	BnaC01g16350D	0.0613907	-0.199123	-0.601953	-0.245153	0.00578787	0.137721	0.958715	0.775505	0.201688	0.65539	1	0.863797	BnaC01g16350D	-0.306544	0.204911	0.739675	1	1	0.722294	BnaC01g16350D							BnaC01g16350D
BnaC07g38970D	GSBRNA2T00154446001	2088		AT4G24520.1	ATR1	P450 reductase 1	BnaC07g38970D	-0.0520824	0.029838	-0.0625735	0.0953183	0.323071	0.0441385	0.838636	0.936683	0.956573	0.715597	0.127309	0.995815	BnaC07g38970D	0.00769445	0.00352161	-0.0360473	-0.139706	-0.289711	-0.142759	0.99943	1	0.966857	0.628499	0.216802	0.665363	BnaC07g38970D	-0.147401	-0.293233	-0.106712	1	1	1	BnaC07g38970D							BnaC07g38970D
BnaCnng67910D	GSBRNA2T00098200001	1779		AT4G24520.1	ATR1	P450 reductase 1	BnaCnng67910D	-0.819057	-0.238993	0.386188	-1.06052	-0.847495	0.327107	0.063211	0.70996	0.800015	0.016289	0.0791412	0.799889	BnaCnng67910D	-0.537457	-0.46635	-1.76871	-0.295998	0.142152	-1.70962	0.369699	0.479111	0.00107654	0.673648	0.866391	0.000840986	BnaCnng67910D	0.241459	0.608502	0.0590811	1	1	1	BnaCnng67910D							BnaCnng67910D
BnC07CBL3	more reduced in Zhongshuang
BnaA01g15690D	GSBRNA2T00149543001	681		AT4G26570.1	CBL3	calcineurin B-like 3	BnaA01g15690D	-0.575255	-0.335434	-0.075588	-0.493619	-0.263558	0.152901	0.00432024	0.168436	0.943978	0.0197177	0.279367	0.807944	BnaA01g15690D	-0.271663	-0.433489	-0.23116	-0.3533	-0.505366	-0.459648	0.348378	0.0739102	0.486053	0.155534	0.0254519	0.0688869	BnaA01g15690D	-0.0816362	-0.0718762	-0.228489	1	1	0.948733	BnaA01g15690D	Bra026421	63.8576	27.585	-1.21097	1.24491e-20	6.86476e-20	BnaA01g15690D
BnaA03g48110D	GSBRNA2T00075268001	681		AT4G26570.1	CBL3	calcineurin B-like 3	BnaA03g48110D	-1.45282	-1.48738	-0.165508	-1.49092	-1.89761	0.0111282	5.25819e-08	1.10321e-07	0.843676	3.52919e-08	3.69231e-12	1	BnaA03g48110D	-0.2967	-0.548269	-0.618923	-0.258596	-0.138035	-0.795559	0.499485	0.102434	0.0605392	0.532009	0.784992	0.00836841	BnaA03g48110D	0.0381034	0.410234	-0.176636	1	1	1	BnaA03g48110D	Bra019099	57.5248	11.7709	-2.28896	1.00368e-86	1.27691e-85	BnaA03g48110D	Bra019099	56.3162
BnaC01g18690D	GSBRNA2T00157416001	681		AT4G26570.1	CBL3	calcineurin B-like 3	BnaC01g18690D	-0.297096	-0.0973386	0.0530348	-0.119715	-0.291638	-0.0442359	0.160268	0.750781	0.976338	0.65566	0.212271	0.999005	BnaC01g18690D	-0.0138079	-0.306524	0.00944855	-0.191189	-0.112224	0.106719	0.991856	0.257938	1	0.504598	0.738788	0.785318	BnaC01g18690D	-0.177381	0.1943	0.0972707	1	1	1	BnaC01g18690D							BnaC01g18690D
BnaC07g40720D	GSBRNA2T00154643001	681		AT4G26570.1	CBL3	calcineurin B-like 3	BnaC07g40720D	-2.37832	-1.3394	-0.172142	-2.71659	-1.74531	-0.0175545	1.88479e-15	1.94913e-05	0.863457	1.69931e-19	6.7573e-09	1	BnaC07g40720D	-0.509108	-0.775164	-0.94315	-0.170837	-0.369256	-1.09774	0.183285	0.0208096	0.00464576	0.761855	0.391889	0.00061903	BnaC07g40720D	0.338272	0.405908	-0.154587	1	1	1	BnaC07g40720D							BnaC07g40720D
[truncated: 41 more columns]
